# Supplementary material
Source: PeerJ journal article supplement (doi:10.7717/peerj-cs.3610)
Supplement: Solar_station_site_1_Nominal_capacity50MW.xlsx [file Solar_station_site_1_Nominal_capacity50MW.xlsx]

## Sheet: sheet1
Time(year-month-day h:m:s)	Total solar irradiance (W/m2)	Direct normal irradiance (W/m2)	Global horizontal irradiance (W/m2)	Air temperature (°C)	Atmosphere (hpa)	Power (MW)
2019-01-01 00:00:00	0	0	0	-11.7	930.5	0
2019-01-01 00:15:00	0	0	0	-11.8	930.5	0
2019-01-01 00:30:00	0	0	0	-11.4	930.5	0
2019-01-01 00:45:00	0	0	0	-11.5	930.5	0
2019-01-01 01:00:00	0	0	0	-11.5	930.4	0
2019-01-01 01:15:00	0	0	0	-11.8	930.1	0
2019-01-01 01:30:00	0	0	0	-11.4	930	0
2019-01-01 01:45:00	0	0	0	-10.7	930	0
2019-01-01 02:00:00	0	1	0	-10.9	929.8	0
2019-01-01 02:15:00	0	0	0	-10.9	929.8	0
2019-01-01 02:30:00	0	1	0	-11.1	929.6	0
2019-01-01 02:45:00	0	0	0	-10.1	929.5	0
2019-01-01 03:00:00	0	1	0	-10.5	929.5	0
2019-01-01 03:15:00	0	0	0	-11.1	929.7	0
2019-01-01 03:30:00	0	1	0	-11.3	929.5	0
2019-01-01 03:45:00	0	0	0	-11	929.6	0
2019-01-01 04:00:00	0	1	0	-11.6	929.9	0
2019-01-01 04:15:00	0	0	0	-11.3	929.7	0
2019-01-01 04:30:00	0	1	0	-11.3	929.6	0
2019-01-01 04:45:00	0	0	0	-11.4	929.5	0
2019-01-01 05:00:00	0	1	0	-11.7	929.5	0
2019-01-01 05:15:00	0	0	0	-11.1	929.3	0
2019-01-01 05:30:00	0	0	0	-10.7	929.3	0
2019-01-01 05:45:00	0	1	0	-11.4	929.3	0
2019-01-01 06:00:00	0	0	0	-11.5	929.1	0
2019-01-01 06:15:00	0	1	0	-11.7	929	0
2019-01-01 06:30:00	0	0	0	-11.6	928.8	0
2019-01-01 06:45:00	0	1	0	-12.2	928.7	0
2019-01-01 07:00:00	0	0	0	-12.7	928.7	0
2019-01-01 07:15:00	0	0	0	-12.7	928.8	0
2019-01-01 07:30:00	0	0	0	-12.6	929	0
2019-01-01 07:45:00	0	1	0	-13	929	0
2019-01-01 08:00:00	0	0	0	-12.7	928.9	0
2019-01-01 08:15:00	0	0	0	-12.7	929	0
2019-01-01 08:30:00	0	0	0	-12.5	929.1	0
2019-01-01 08:45:00	0	0	0	-12.5	929.2	0
2019-01-01 09:00:00	2	0	1	-12.7	929.3	0
2019-01-01 09:15:00	14	1	7	-12.5	929.3	0.238533
2019-01-01 09:30:00	63	12	20	-12.7	929.6	0.856733
2019-01-01 09:45:00	92	11	34	-13.3	929.5	2.3806
2019-01-01 10:00:00	237	36	64	-12.9	929.6	4.8044
2019-01-01 10:15:00	279	35	91	-12.9	929.5	8.13113
2019-01-01 10:30:00	444	54	137	-12.5	929.1	15.1601
2019-01-01 10:45:00	435	49	135	-12	928.9	16.6566
2019-01-01 11:00:00	415	29	153	-11.6	928.7	19.2751
2019-01-01 11:15:00	486	32	187	-10.6	928.3	21.8933
2019-01-01 11:30:00	598	37	237	-10	928	25.8685
2019-01-01 11:45:00	661	37	270	-8.6	927.8	28.3103
2019-01-01 12:00:00	735	36	318	-8.4	927.5	30.6696
2019-01-01 12:15:00	743	35	322	-7.6	927.2	31.1261
2019-01-01 12:30:00	786	32	355	-7.8	926.7	33.8291
2019-01-01 12:45:00	793	27	366	-7.7	926.4	34.6374
2019-01-01 13:00:00	776	22	364	-7.3	926.3	34.7974
2019-01-01 13:15:00	823	20	394	-7.1	926.1	36.7744
2019-01-01 13:30:00	827	20	411	-7.1	925.9	35.821
2019-01-01 13:45:00	818	18	428	-6.7	925.5	34.6736
2019-01-01 14:00:00	746	17	363	-6.8	925.4	33.5337
2019-01-01 14:15:00	714	15	342	-6.8	925.2	31.9964
2019-01-01 14:30:00	701	14	329	-6.4	924.9	30.9723
2019-01-01 14:45:00	753	14	343	-5	924.6	32.9824
2019-01-01 15:00:00	680	15	304	-5.2	924.3	30.0327
2019-01-01 15:15:00	519	13	222	-5.5	924.2	27.3357
2019-01-01 15:30:00	678	13	285	-5.7	924.1	31.5343
2019-01-01 15:45:00	475	10	193	-4.9	923.9	23.2026
2019-01-01 16:00:00	547	12	193	-5.4	924	24.1242
2019-01-01 16:15:00	445	12	143	-5.3	923.9	19.0436
2019-01-01 16:30:00	458	12	148	-5.5	924	20.1233
2019-01-01 16:45:00	313	10	110	-5.5	924	11.1999
2019-01-01 17:00:00	152	6	77	-5.9	923.9	5.63693
2019-01-01 17:15:00	92	3	58	-6.4	924.2	3.34013
2019-01-01 17:30:00	46	1	41	-6.8	924.6	1.58733
2019-01-01 17:45:00	19	1	17	-7	924.9	0.363067
2019-01-01 18:00:00	10	1	8	-7.3	925.1	0.029667
2019-01-01 18:15:00	2	1	2	-7.6	925.1	0
2019-01-01 18:30:00	0	0	0	-7.9	925.1	0
2019-01-01 18:45:00	0	0	0	-7.9	925.2	0
2019-01-01 19:00:00	0	1	0	-7.9	925.3	0
2019-01-01 19:15:00	0	0	0	-8.4	925.2	0
2019-01-01 19:30:00	0	0	0	-8.1	925.3	0
2019-01-01 19:45:00	0	0	0	-8.2	925.3	0
2019-01-01 20:00:00	0	0	0	-8.3	925.4	0
2019-01-01 20:15:00	0	0	0	-8.2	925.4	0
2019-01-01 20:30:00	0	0	0	-8.6	925.3	0
2019-01-01 20:45:00	0	0	0	-8.4	925.2	0
2019-01-01 21:00:00	0	0	0	-8.3	925.2	0
2019-01-01 21:15:00	0	0	0	-8	925.2	0
2019-01-01 21:30:00	0	0	0	-7.8	925	0
2019-01-01 21:45:00	0	0	0	-8.1	924.9	0
2019-01-01 22:00:00	0	0	0	-8.1	924.7	0
2019-01-01 22:15:00	0	1	0	-8.5	924.6	0
2019-01-01 22:30:00	0	1	0	-8.9	924.4	0
2019-01-01 22:45:00	0	0	0	-8.8	924.3	0
2019-01-01 23:00:00	0	0	0	-8.2	924.3	0
2019-01-01 23:15:00	0	0	0	-8.3	924.3	0
2019-01-01 23:30:00	0	3	0	-10.7	924.2	0
2019-01-01 23:45:00	0	0	0	-9.5	924.1	0
2019-01-02 00:00:00	0	1	0	-9.9	924.1	0
2019-01-02 00:15:00	0	1	0	-10.9	924.2	0
2019-01-02 00:30:00	0	1	0	-11.2	924.3	0
2019-01-02 00:45:00	0	1	0	-11.2	924.3	0
2019-01-02 01:00:00	0	0	0	-11.5	924.3	0
2019-01-02 01:15:00	0	1	0	-11.5	924.3	0
2019-01-02 01:30:00	0	0	0	-11.6	924.3	0
2019-01-02 01:45:00	0	0	0	-11.5	924.3	0
2019-01-02 02:00:00	0	0	0	-11.9	924.3	0
2019-01-02 02:15:00	0	0	0	-11.9	924.3	0
2019-01-02 02:30:00	0	0	0	-12.1	924.2	0
2019-01-02 02:45:00	0	1	0	-12.5	924.2	0
2019-01-02 03:00:00	0	1	0	-12.9	924.1	0
2019-01-02 03:15:00	0	0	0	-13.1	924.1	0
2019-01-02 03:30:00	0	1	0	-13.1	924.2	0
2019-01-02 03:45:00	0	1	0	-13.7	924.1	0
2019-01-02 04:00:00	0	1	0	-13.6	924.3	0
2019-01-02 04:15:00	0	0	0	-13.3	924.3	0
2019-01-02 04:30:00	0	0	0	-13.5	924.1	0
2019-01-02 04:45:00	0	1	0	-13.5	924.1	0
2019-01-02 05:00:00	0	1	0	-14	924	0
2019-01-02 05:15:00	0	0	0	-13.9	924.2	0
2019-01-02 05:30:00	0	1	0	-14	924.2	0
2019-01-02 05:45:00	0	0	0	-14.4	924.1	0
2019-01-02 06:00:00	0	1	0	-14.6	924.2	0
2019-01-02 06:15:00	0	1	0	-14.9	924	0
2019-01-02 06:30:00	0	0	0	-14.5	924	0
2019-01-02 06:45:00	0	1	0	-14.6	924	0
2019-01-02 07:00:00	0	1	0	-14.4	923.9	0
2019-01-02 07:15:00	0	0	0	-14.6	923.7	0
2019-01-02 07:30:00	0	0	0	-14.1	923.7	0
2019-01-02 07:45:00	0	1	0	-14.2	923.8	0
2019-01-02 08:00:00	0	0	0	-13.9	923.9	0
2019-01-02 08:15:00	0	1	0	-14.2	924.1	0
2019-01-02 08:30:00	0	0	0	-14.5	924.1	0
2019-01-02 08:45:00	0	1	0	-14.4	924.7	0
2019-01-02 09:00:00	1	2	0	-16	924.7	0
2019-01-02 09:15:00	10	0	6	-16.1	925	0.156
2019-01-02 09:30:00	48	8	18	-16	925.4	1.04167
2019-01-02 09:45:00	111	11	31	-14.7	925.3	2.5178
2019-01-02 10:00:00	219	36	55	-14.8	925.2	4.53453
2019-01-02 10:15:00	314	48	79	-14.8	925.1	7.7816
2019-01-02 10:30:00	406	57	107	-14.1	924.8	13.9945
2019-01-02 10:45:00	484	47	135	-13.2	924.5	19.1436
2019-01-02 11:00:00	553	49	167	-11.8	924.1	22.6588
2019-01-02 11:15:00	608	48	198	-11	923.8	25.5741
2019-01-02 11:30:00	652	47	229	-10.4	923.6	28.0909
2019-01-02 11:45:00	695	48	260	-11.6	923.3	30.2883
2019-01-02 12:00:00	731	43	287	-10.8	923.4	32.2712
2019-01-02 12:15:00	766	40	313	-10.7	923.5	33.9479
2019-01-02 12:30:00	801	37	339	-11	923.4	35.3997
2019-01-02 12:45:00	824	31	357	-10.7	923.4	36.4975
2019-01-02 13:00:00	846	28	373	-10.5	923.5	37.3999
2019-01-02 13:15:00	867	25	389	-10.4	923.4	38.1049
2019-01-02 13:30:00	876	22	407	-9.9	923	38.3305
2019-01-02 13:45:00	870	18	444	-8.7	922.8	38.3597
2019-01-02 14:00:00	871	19	414	-9.4	922.5	38.1982
2019-01-02 14:15:00	852	18	381	-9	922.3	37.72
2019-01-02 14:30:00	839	18	369	-8.6	922.2	36.7
2019-01-02 14:45:00	811	16	349	-8.2	922.2	35.5947
2019-01-02 15:00:00	739	15	307	-8	922	34.2443
2019-01-02 15:15:00	733	15	296	-8	922	33.6335
2019-01-02 15:30:00	700	14	268	-7.1	922	31.9711
2019-01-02 15:45:00	656	13	237	-6.8	922.1	29.8899
2019-01-02 16:00:00	619	14	206	-7.1	922.2	27.2028
2019-01-02 16:15:00	539	13	167	-7.3	922.5	23.4641
2019-01-02 16:30:00	464	12	130	-7.5	923	18.0858
2019-01-02 16:45:00	380	11	98	-7.6	923.2	14.2808
2019-01-02 17:00:00	343	9	84	-7.7	923.5	10.188
2019-01-02 17:15:00	250	8	61	-7.9	923.5	5.61007
2019-01-02 17:30:00	195	7	42	-8.2	923.7	3.55513
2019-01-02 17:45:00	88	5	26	-8.1	923.8	1.629
2019-01-02 18:00:00	20	2	10	-8.5	923.8	0.2466
2019-01-02 18:15:00	4	1	2	-8.9	924	0
2019-01-02 18:30:00	0	1	0	-9.5	924.1	0
2019-01-02 18:45:00	0	0	0	-9.7	924.4	0
2019-01-02 19:00:00	0	0	0	-9.7	924.6	0
2019-01-02 19:15:00	0	1	0	-9.8	924.8	0
2019-01-02 19:30:00	0	0	0	-10.2	924.8	0
2019-01-02 19:45:00	0	0	0	-10.2	925	0
2019-01-02 20:00:00	0	1	0	-10.3	925.2	0
2019-01-02 20:15:00	0	0	0	-10.2	925.4	0
2019-01-02 20:30:00	0	1	0	-10.4	925.7	0
2019-01-02 20:45:00	0	0	0	-10.3	925.7	0
2019-01-02 21:00:00	0	1	0	-10.8	925.9	0
2019-01-02 21:15:00	0	1	0	-11.2	926.2	0
2019-01-02 21:30:00	0	1	0	-11.4	926.1	0
2019-01-02 21:45:00	0	0	0	-11.2	926.3	0
2019-01-02 22:00:00	0	1	0	-11.1	926.5	0
2019-01-02 22:15:00	0	0	0	-11.2	926.5	0
2019-01-02 22:30:00	0	0	0	-11	926.5	0
2019-01-02 22:45:00	0	1	0	-11.7	926.4	0
2019-01-02 23:00:00	0	0	0	-11.9	926.2	0
2019-01-02 23:15:00	0	0	0	-11.5	926.1	0
2019-01-02 23:30:00	0	0	0	-11.7	926.2	0
2019-01-02 23:45:00	0	0	0	-11.6	926	0
2019-01-03 00:00:00	0	0	0	-11.5	926.1	0
2019-01-03 00:15:00	0	1	0	-12	926.1	0
2019-01-03 00:30:00	0	0	0	-11.9	926.1	0
2019-01-03 00:45:00	0	0	0	-11.6	926.2	0
2019-01-03 01:00:00	0	1	0	-11.7	926	0
2019-01-03 01:15:00	0	1	0	-12.5	926	0
2019-01-03 01:30:00	0	0	0	-12.6	926	0
2019-01-03 01:45:00	0	0	0	-12.3	926	0
2019-01-03 02:00:00	0	3	0	-14	926.1	0
2019-01-03 02:15:00	0	0	0	-14.5	926.3	0
2019-01-03 02:30:00	0	2	0	-14.6	926.2	0
2019-01-03 02:45:00	0	1	0	-14.7	926.4	0
2019-01-03 03:00:00	0	0	0	-14.9	926.5	0
2019-01-03 03:15:00	0	1	0	-14.6	926.6	0
2019-01-03 03:30:00	0	0	0	-14.4	926.7	0
2019-01-03 03:45:00	0	1	0	-14.7	926.7	0
2019-01-03 04:00:00	0	1	0	-15.1	926.9	0
2019-01-03 04:15:00	0	1	0	-15.5	926.9	0
2019-01-03 04:30:00	0	0	0	-15.6	927.1	0
2019-01-03 04:45:00	0	0	0	-15.8	927	0
2019-01-03 05:00:00	0	0	0	-15.8	927	0
2019-01-03 05:15:00	0	1	0	-16.1	927	0
2019-01-03 05:30:00	0	0	0	-16	926.9	0
2019-01-03 05:45:00	0	0	0	-15.6	927	0
2019-01-03 06:00:00	0	0	0	-15.8	927.1	0
2019-01-03 06:15:00	0	0	0	-15.5	927	0
2019-01-03 06:30:00	0	0	0	-15.3	927	0
2019-01-03 06:45:00	0	1	0	-15.5	927.1	0
2019-01-03 07:00:00	0	0	0	-15.8	927.2	0
2019-01-03 07:15:00	0	0	0	-15.5	927.4	0
2019-01-03 07:30:00	0	1	0	-15.8	927.5	0
2019-01-03 07:45:00	0	1	0	-16.3	927.6	0
2019-01-03 08:00:00	0	0	0	-16.2	927.7	0
2019-01-03 08:15:00	0	0	0	-15.5	928.1	0
2019-01-03 08:30:00	0	0	0	-15.4	928.3	0
2019-01-03 08:45:00	0	1	0	-15.6	928.4	0
2019-01-03 09:00:00	1	0	0	-15.9	928.7	0
2019-01-03 09:15:00	12	2	6	-16	929	0.1792
2019-01-03 09:30:00	61	14	18	-16.2	929.3	1.04293
2019-01-03 09:45:00	99	7	28	-16.1	929.5	2.6336
2019-01-03 10:00:00	242	46	55	-15.9	929.7	4.8484
2019-01-03 10:15:00	340	58	80	-15.3	929.8	8.2496
2019-01-03 10:30:00	427	66	109	-15	929.7	14.6627
2019-01-03 10:45:00	499	52	138	-14.2	929.4	19.489
2019-01-03 11:00:00	558	54	167	-13.6	929.5	22.9108
2019-01-03 11:15:00	579	50	188	-12.7	929.3	25.5243
2019-01-03 11:30:00	635	52	220	-11.6	929	27.7645
2019-01-03 11:45:00	664	50	246	-10.8	928.9	28.6171
2019-01-03 12:00:00	726	47	281	-9.9	928.7	32.1979
2019-01-03 12:15:00	767	43	311	-9.3	928.7	33.4856
2019-01-03 12:30:00	806	38	337	-8.8	928.3	35.175
2019-01-03 12:45:00	826	35	355	-8.3	928.3	36.3035
2019-01-03 13:00:00	839	29	368	-7.8	928	36.7828
2019-01-03 13:15:00	859	26	382	-7.3	927.8	37.2662
2019-01-03 13:30:00	844	21	389	-6.6	927.5	37.2822
2019-01-03 13:45:00	836	22	418	-5.8	927.4	36.8999
2019-01-03 14:00:00	849	19	408	-5.8	927.2	37.8617
2019-01-03 14:15:00	842	17	373	-6.5	927	37.7469
2019-01-03 14:30:00	804	19	350	-7	927	36.4944
2019-01-03 14:45:00	795	16	339	-6.9	926.8	36.1935
2019-01-03 15:00:00	745	16	309	-6.6	926.9	35.1172
2019-01-03 15:15:00	723	14	289	-6.7	926.8	33.5897
2019-01-03 15:30:00	675	13	256	-6.5	926.8	31.4922
2019-01-03 15:45:00	624	14	223	-6.3	926.8	28.5605
2019-01-03 16:00:00	580	13	192	-6	926.7	25.5891
2019-01-03 16:15:00	537	13	164	-6	926.9	23.1374
2019-01-03 16:30:00	479	12	135	-6.1	927	19.9665
2019-01-03 16:45:00	426	11	111	-6.3	927.1	15.9766
2019-01-03 17:00:00	363	10	89	-6.2	927.2	11.0577
2019-01-03 17:15:00	278	9	67	-6.4	927.5	6.1818
2019-01-03 17:30:00	166	7	41	-6.8	927.5	3.1438
2019-01-03 17:45:00	75	5	23	-7	927.6	1.4776
2019-01-03 18:00:00	26	2	11	-7.6	928	0.3896
2019-01-03 18:15:00	6	1	3	-7.8	928.3	0
2019-01-03 18:30:00	0	1	0	-8.5	928.5	0
2019-01-03 18:45:00	0	1	0	-8.9	929	0
2019-01-03 19:00:00	0	0	0	-9	929.2	0
2019-01-03 19:15:00	0	0	0	-9.2	929.4	0
2019-01-03 19:30:00	0	0	0	-9.2	929.5	0
2019-01-03 19:45:00	0	1	0	-9.1	929.6	0
2019-01-03 20:00:00	0	0	0	-9.1	929.8	0
2019-01-03 20:15:00	0	0	0	-9	929.7	0
2019-01-03 20:30:00	0	0	0	-8.9	929.8	0
2019-01-03 20:45:00	0	0	0	-9.1	929.8	0
2019-01-03 21:00:00	0	0	0	-9.3	929.7	0
2019-01-03 21:15:00	0	1	0	-9.7	929.7	0
2019-01-03 21:30:00	0	0	0	-9.4	929.8	0
2019-01-03 21:45:00	0	0	0	-9.7	929.8	0
2019-01-03 22:00:00	0	1	0	-10.2	929.9	0
2019-01-03 22:15:00	0	0	0	-10.4	929.7	0
2019-01-03 22:30:00	0	0	0	-10.7	929.7	0
2019-01-03 22:45:00	0	0	0	-9.3	929.7	0
2019-01-03 23:00:00	0	0	0	-9.3	929.5	0
2019-01-03 23:15:00	0	0	0	-9	929.3	0
2019-01-03 23:30:00	0	0	0	-9.5	929	0
2019-01-03 23:45:00	0	0	0	-9.4	928.9	0
2019-01-04 00:00:00	0	2	0	-10.7	928.7	0
2019-01-04 00:15:00	0	1	0	-11.3	928.7	0
2019-01-04 00:30:00	0	0	0	-10.9	928.7	0
2019-01-04 00:45:00	0	2	0	-12.1	928.7	0
2019-01-04 01:00:00	0	0	0	-11.5	928.6	0
2019-01-04 01:15:00	0	1	0	-12	928.7	0
2019-01-04 01:30:00	0	0	0	-12.3	928.5	0
2019-01-04 01:45:00	0	1	0	-12.7	928.5	0
2019-01-04 02:00:00	0	0	0	-12.2	928.5	0
2019-01-04 02:15:00	0	1	0	-12	928.4	0
2019-01-04 02:30:00	0	1	0	-12.4	928.4	0
2019-01-04 02:45:00	0	0	0	-12.1	928.3	0
2019-01-04 03:00:00	0	0	0	-12.2	928.4	0
2019-01-04 03:15:00	0	0	0	-11.8	928.2	0
2019-01-04 03:30:00	0	0	0	-11.2	928	0
2019-01-04 03:45:00	0	0	0	-10.3	928	0
2019-01-04 04:00:00	0	1	0	-11	927.8	0
2019-01-04 04:15:00	0	1	0	-11.5	927.7	0
2019-01-04 04:30:00	0	0	0	-11	927.6	0
2019-01-04 04:45:00	0	1	0	-11.5	927.2	0
2019-01-04 05:00:00	0	2	0	-13.4	927.2	0
2019-01-04 05:15:00	0	0	0	-13	927.2	0
2019-01-04 05:30:00	0	0	0	-12.5	927.4	0
2019-01-04 05:45:00	0	0	0	-12.4	927.2	0
2019-01-04 06:00:00	0	0	0	-12.5	927.2	0
2019-01-04 06:15:00	0	0	0	-12.5	927.1	0
2019-01-04 06:30:00	0	0	0	-12.9	927.1	0
2019-01-04 06:45:00	0	0	0	-12.8	927.1	0
2019-01-04 07:00:00	0	0	0	-12.7	927	0
2019-01-04 07:15:00	0	0	0	-12.4	926.8	0
2019-01-04 07:30:00	0	0	0	-12.5	926.9	0
2019-01-04 07:45:00	0	1	0	-12.2	926.9	0
2019-01-04 08:00:00	0	0	0	-10.9	926.8	0
2019-01-04 08:15:00	0	1	0	-11.9	926.8	0
2019-01-04 08:30:00	0	0	0	-12.1	926.8	0
2019-01-04 08:45:00	0	0	0	-12.4	926.9	0
2019-01-04 09:00:00	3	0	1	-11.4	926.9	0
2019-01-04 09:15:00	16	4	9	-12.8	927.1	0.393267
2019-01-04 09:30:00	71	14	27	-13.9	927.3	1.48447
2019-01-04 09:45:00	77	6	36	-13.5	927.4	2.8686
2019-01-04 10:00:00	245	49	60	-12.7	927.4	4.92333
2019-01-04 10:15:00	344	62	84	-12.6	927.5	8.34967
2019-01-04 10:30:00	420	67	112	-11.9	927.4	14.8577
2019-01-04 10:45:00	476	51	147	-11.1	927.1	19.1795
2019-01-04 11:00:00	425	39	153	-10.4	926.8	17.8983
2019-01-04 11:15:00	510	41	192	-9.6	926.5	21.0674
2019-01-04 11:30:00	574	42	236	-8.1	926.3	23.8696
2019-01-04 11:45:00	484	29	216	-6.5	925.9	18.8768
2019-01-04 12:00:00	335	15	175	-6.4	925.5	15.4625
2019-01-04 12:15:00	242	6	164	-5.8	925.6	12.0228
2019-01-04 12:30:00	253	6	180	-5.9	925.1	13.4035
2019-01-04 12:45:00	412	16	236	-6.3	924.9	21.7966
2019-01-04 13:00:00	450	14	255	-6.1	924.8	20.1257
2019-01-04 13:15:00	314	9	211	-6.2	924.6	15.0939
2019-01-04 13:30:00	270	6	203	-6.3	924.5	13.6397
2019-01-04 13:45:00	361	10	234	-6.3	924.4	17.0761
2019-01-04 14:00:00	382	10	232	-6.3	924.5	18.2482
2019-01-04 14:15:00	705	14	368	-5.9	924.3	30.1347
2019-01-04 14:30:00	498	14	239	-5.8	923.7	25.8159
2019-01-04 14:45:00	712	17	318	-5.6	923.5	34.4975
2019-01-04 15:00:00	601	19	270	-6	923.5	20.5037
2019-01-04 15:15:00	312	5	198	-6.2	923.4	11.8847
2019-01-04 15:30:00	256	3	182	-6.3	923.5	14.0205
2019-01-04 15:45:00	530	10	258	-5.7	923.5	22.4713
2019-01-04 16:00:00	599	12	229	-4.1	923	25.9099
2019-01-04 16:15:00	549	15	176	-4.6	922.9	23.8205
2019-01-04 16:30:00	489	13	142	-4.8	922.7	20.2881
2019-01-04 16:45:00	391	11	102	-4.1	922.5	15.0203
2019-01-04 17:00:00	323	11	81	-4.1	922.1	10.1033
2019-01-04 17:15:00	237	9	62	-4.4	922.2	5.91127
2019-01-04 17:30:00	139	7	40	-4.7	922.2	3.33967
2019-01-04 17:45:00	66	4	24	-4.7	922	1.70287
2019-01-04 18:00:00	24	2	12	-5	922.1	0.479333
2019-01-04 18:15:00	3	1	2	-5.6	922.2	0
2019-01-04 18:30:00	0	0	0	-6	922.3	0
2019-01-04 18:45:00	0	1	0	-6.6	922.2	0
2019-01-04 19:00:00	0	1	0	-7.7	922.2	0
2019-01-04 19:15:00	0	0	0	-7.7	922.2	0
2019-01-04 19:30:00	0	0	0	-7.3	922.5	0
2019-01-04 19:45:00	0	1	0	-7.8	922.3	0
2019-01-04 20:00:00	0	0	0	-8.2	922.1	0
2019-01-04 20:15:00	0	0	0	-7.6	921.7	0
2019-01-04 20:30:00	0	0	0	-7.5	921.5	0
2019-01-04 20:45:00	0	0	0	-7.6	921.1	0
2019-01-04 21:00:00	0	1	0	-7.5	920.9	0
2019-01-04 21:15:00	0	1	0	-7.7	920.7	0
2019-01-04 21:30:00	0	1	0	-8.6	920.4	0
2019-01-04 21:45:00	0	1	0	-8.9	920.1	0
2019-01-04 22:00:00	0	0	0	-8.3	919.9	0
2019-01-04 22:15:00	0	0	0	-7.9	919.8	0
2019-01-04 22:30:00	0	0	0	-6.9	919.4	0
2019-01-04 22:45:00	0	0	0	-6.8	918.9	0
2019-01-04 23:00:00	0	2	0	-8.7	918.7	0
2019-01-04 23:15:00	0	0	0	-9.3	918.6	0
2019-01-04 23:30:00	0	1	0	-9.4	918.5	0
2019-01-04 23:45:00	0	0	0	-8.8	918.4	0
2019-01-05 00:00:00	0	1	0	-10	918.1	0
2019-01-05 00:15:00	0	0	0	-9.9	918	0
2019-01-05 00:30:00	0	1	0	-10.1	917.9	0
2019-01-05 00:45:00	0	0	0	-10.1	917.6	0
2019-01-05 01:00:00	0	0	0	-9.9	917.4	0
2019-01-05 01:15:00	0	0	0	-9.8	916.9	0
2019-01-05 01:30:00	0	0	0	-9.7	916.4	0
2019-01-05 01:45:00	0	0	0	-8.2	916.2	0
2019-01-05 02:00:00	0	0	0	-8.7	915.8	0
2019-01-05 02:15:00	0	1	0	-8	915.9	0
2019-01-05 02:30:00	0	2	0	-10.6	915.7	0
2019-01-05 02:45:00	0	0	0	-9.8	915.7	0
2019-01-05 03:00:00	0	0	0	-8.4	915.7	0
2019-01-05 03:15:00	0	2	0	-10.3	915.9	0
2019-01-05 03:30:00	0	1	0	-11.5	916	0
2019-01-05 03:45:00	0	0	0	-11.5	916	0
2019-01-05 04:00:00	0	1	0	-11.7	916	0
2019-01-05 04:15:00	0	0	0	-11.5	915.9	0
2019-01-05 04:30:00	0	0	0	-11.5	916	0
2019-01-05 04:45:00	0	0	0	-11.6	915.7	0
2019-01-05 05:00:00	0	0	0	-11.2	915.4	0
2019-01-05 05:15:00	0	0	0	-10.7	915.3	0
2019-01-05 05:30:00	0	0	0	-10.6	915.2	0
2019-01-05 05:45:00	0	1	0	-11	915.2	0
2019-01-05 06:00:00	0	1	0	-11.8	915.3	0
2019-01-05 06:15:00	0	0	0	-12	915.6	0
2019-01-05 06:30:00	0	0	0	-11.4	915.8	0
2019-01-05 06:45:00	0	1	0	-12.3	915.6	0
2019-01-05 07:00:00	0	2	0	-13.5	915.9	0
2019-01-05 07:15:00	0	0	0	-12.4	916.1	0
2019-01-05 07:30:00	0	0	0	-12	916.4	0
2019-01-05 07:45:00	0	0	0	-12.9	916.5	0
2019-01-05 08:00:00	0	0	0	-13.4	916.5	0
2019-01-05 08:15:00	0	0	0	-12.9	916.6	0
2019-01-05 08:30:00	0	0	0	-12.2	916.9	0
2019-01-05 08:45:00	0	0	0	-11.7	917.3	0
2019-01-05 09:00:00	0	1	0	-12.2	917.6	0
2019-01-05 09:15:00	5	1	3	-12.4	917.9	0.098
2019-01-05 09:30:00	28	3	15	-14.4	918.3	0.8168
2019-01-05 09:45:00	61	6	26	-13.6	918.9	1.93233
2019-01-05 10:00:00	85	11	33	-12.8	919	3.02493
2019-01-05 10:15:00	251	47	61	-11.9	919.3	7.35193
2019-01-05 10:30:00	356	63	84	-11.3	919.5	12.5595
2019-01-05 10:45:00	484	62	121	-11.8	919	19.0885
2019-01-05 11:00:00	547	63	147	-10.8	919	22.5969
2019-01-05 11:15:00	605	66	176	-10.2	919	25.5814
2019-01-05 11:30:00	660	66	209	-11	918.9	27.9925
2019-01-05 11:45:00	666	63	221	-9.2	918.8	30.5086
2019-01-05 12:00:00	701	59	251	-9.6	918.8	31.7187
2019-01-05 12:15:00	788	58	298	-9.3	919	34.1819
2019-01-05 12:30:00	796	50	311	-9	918.9	35.3064
2019-01-05 12:45:00	832	46	333	-8.3	919	36.4483
2019-01-05 13:00:00	848	40	348	-8.4	919	37.1367
2019-01-05 13:15:00	861	35	360	-7.3	918.9	37.624
2019-01-05 13:30:00	868	31	375	-7.5	918.8	37.7018
2019-01-05 13:45:00	872	27	418	-7.6	918.8	37.4569
2019-01-05 14:00:00	867	25	404	-7.2	918.8	37.4335
2019-01-05 14:15:00	849	20	356	-6.1	918.7	36.8791
2019-01-05 14:30:00	814	17	335	-5.3	918.7	36.2119
2019-01-05 14:45:00	795	17	320	-5.1	918.5	35.4099
2019-01-05 15:00:00	764	18	299	-5.8	918.3	34.3362
2019-01-05 15:15:00	722	16	272	-5.4	918.2	32.9855
2019-01-05 15:30:00	686	15	246	-5.4	918.3	31.2808
2019-01-05 15:45:00	641	15	217	-5.1	918.4	28.9509
2019-01-05 16:00:00	598	15	189	-5.7	918.6	26.3623
2019-01-05 16:15:00	545	14	159	-5.8	918.9	23.4981
2019-01-05 16:30:00	489	12	131	-5.7	919	19.9539
2019-01-05 16:45:00	432	13	107	-5.7	919.2	15.9607
2019-01-05 17:00:00	356	11	84	-6	919.4	11.3809
2019-01-05 17:15:00	279	10	66	-6.2	919.6	6.6136
2019-01-05 17:30:00	187	8	44	-6.1	920	3.65253
2019-01-05 17:45:00	96	6	26	-6.4	920.2	1.81433
2019-01-05 18:00:00	31	3	14	-7.1	920.5	0.501133
2019-01-05 18:15:00	6	1	3	-7.5	920.9	0
2019-01-05 18:30:00	0	1	0	-8.1	921.2	0
2019-01-05 18:45:00	0	1	0	-8.4	921.6	0
2019-01-05 19:00:00	0	0	0	-8.7	921.7	0
2019-01-05 19:15:00	0	0	0	-8.9	922	0
2019-01-05 19:30:00	0	1	0	-9.1	922.3	0
2019-01-05 19:45:00	0	1	0	-8.9	922.7	0
2019-01-05 20:00:00	0	0	0	-8.8	922.9	0
2019-01-05 20:15:00	0	1	0	-8.9	923	0
2019-01-05 20:30:00	0	0	0	-9.1	923.3	0
2019-01-05 20:45:00	0	0	0	-9.6	923.5	0
2019-01-05 21:00:00	0	1	0	-9.9	923.5	0
2019-01-05 21:15:00	0	1	0	-10.4	923.6	0
2019-01-05 21:30:00	0	0	0	-9.9	923.8	0
2019-01-05 21:45:00	0	1	0	-10.1	924	0
2019-01-05 22:00:00	0	0	0	-9.3	924.3	0
2019-01-05 22:15:00	0	1	0	-10	924.2	0
2019-01-05 22:30:00	0	0	0	-10.2	924.3	0
2019-01-05 22:45:00	0	1	0	-10.4	924.4	0
2019-01-05 23:00:00	0	0	0	-10.3	924.5	0
2019-01-05 23:15:00	0	0	0	-10.2	924.6	0
2019-01-05 23:30:00	0	0	0	-10.2	924.6	0
2019-01-05 23:45:00	0	0	0	-10.1	924.6	0
2019-01-06 00:00:00	0	0	0	-10.5	924.4	0
2019-01-06 00:15:00	0	0	0	-10.9	924.4	0
2019-01-06 00:30:00	0	1	0	-10.8	924.4	0
2019-01-06 00:45:00	0	1	0	-11.5	924.5	0
2019-01-06 01:00:00	0	0	0	-11.3	924.8	0
2019-01-06 01:15:00	0	1	0	-11.4	924.8	0
2019-01-06 01:30:00	0	0	0	-11.8	924.9	0
2019-01-06 01:45:00	0	0	0	-12	925	0
2019-01-06 02:00:00	0	0	0	-11.9	925.1	0
2019-01-06 02:15:00	0	0	0	-12	925.4	0
2019-01-06 02:30:00	0	0	0	-12.1	925.5	0
2019-01-06 02:45:00	0	0	0	-11.1	925.7	0
2019-01-06 03:00:00	0	0	0	-10.7	925.7	0
2019-01-06 03:15:00	0	0	0	-10.7	925.8	0
2019-01-06 03:30:00	0	0	0	-10.3	926.1	0
2019-01-06 03:45:00	0	0	0	-10	926.4	0
2019-01-06 04:00:00	0	1	0	-11.2	926.4	0
2019-01-06 04:15:00	0	0	0	-11	926.5	0
2019-01-06 04:30:00	0	0	0	-10.8	926.7	0
2019-01-06 04:45:00	0	0	0	-10.8	926.5	0
2019-01-06 05:00:00	0	0	0	-10.7	926.6	0
2019-01-06 05:15:00	0	0	0	-10.7	926.8	0
2019-01-06 05:30:00	0	0	0	-10.4	926.8	0
2019-01-06 05:45:00	0	0	0	-10.4	926.9	0
2019-01-06 06:00:00	0	0	0	-10.5	926.8	0
2019-01-06 06:15:00	0	0	0	-10.4	926.8	0
2019-01-06 06:30:00	0	0	0	-10.7	927.1	0
2019-01-06 06:45:00	0	0	0	-10.6	927.2	0
2019-01-06 07:00:00	0	1	0	-10.5	927.6	0
2019-01-06 07:15:00	0	0	0	-10.8	927.7	0
2019-01-06 07:30:00	0	0	0	-10.9	928	0
2019-01-06 07:45:00	0	0	0	-10.9	928.3	0
2019-01-06 08:00:00	0	0	0	-11	928.4	0
2019-01-06 08:15:00	0	1	0	-11.2	928.7	0
2019-01-06 08:30:00	0	0	0	-11	928.9	0
2019-01-06 08:45:00	0	0	0	-10.7	929	0
2019-01-06 09:00:00	1	0	0	-10.7	929.2	0
2019-01-06 09:15:00	11	1	6	-11.2	929.5	0.143533
2019-01-06 09:30:00	43	10	16	-11.5	929.6	0.862
2019-01-06 09:45:00	62	9	28	-11.5	929.8	2.40207
2019-01-06 10:00:00	230	52	52	-11.3	930	4.65853
2019-01-06 10:15:00	268	58	61	-11.5	930.2	7.37927
2019-01-06 10:30:00	326	59	85	-10.9	930.2	12.381
2019-01-06 10:45:00	414	55	112	-10.4	930	17.8695
2019-01-06 11:00:00	546	69	144	-9.2	930.1	21.3816
2019-01-06 11:15:00	500	58	141	-7.8	930	24.2803
2019-01-06 11:30:00	614	68	184	-6.6	929.8	26.2847
2019-01-06 11:45:00	607	59	196	-6	929.6	25.8119
2019-01-06 12:00:00	696	63	235	-6.2	929.4	31.3091
2019-01-06 12:15:00	741	62	258	-5.4	929.3	32.8744
2019-01-06 12:30:00	793	57	292	-5	929.1	34.6475
2019-01-06 12:45:00	856	54	328	-6.3	928.9	35.3697
2019-01-06 13:00:00	856	45	336	-6.1	928.5	36.1523
2019-01-06 13:15:00	837	40	333	-5.9	928.8	36.7035
2019-01-06 13:30:00	863	35	357	-5.9	928.6	37.7178
2019-01-06 13:45:00	886	32	411	-5.8	928.5	37.7251
2019-01-06 14:00:00	879	27	394	-5.6	928.2	37.5939
2019-01-06 14:15:00	855	25	340	-5.4	928	35.0912
2019-01-06 14:30:00	831	18	326	-4.4	927.8	36.3265
2019-01-06 14:45:00	800	18	307	-4.1	927.6	35.431
2019-01-06 15:00:00	769	16	285	-4	927.5	33.1686
2019-01-06 15:15:00	722	15	262	-3.6	927.3	31.4035
2019-01-06 15:30:00	703	15	242	-2.9	927.2	30.3248
2019-01-06 15:45:00	623	15	201	-2.9	927	27.7223
2019-01-06 16:00:00	587	16	178	-3.3	927	24.4559
2019-01-06 16:15:00	534	14	149	-3.4	927.1	22.6338
2019-01-06 16:30:00	462	11	119	-2.9	927.4	18.8953
2019-01-06 16:45:00	377	11	92	-3.4	927.3	15.1524
2019-01-06 17:00:00	329	10	75	-2.8	927.5	10.5701
2019-01-06 17:15:00	195	8	51	-2.8	927.5	5.65893
2019-01-06 17:30:00	195	8	46	-2.9	927.5	3.92253
2019-01-06 17:45:00	109	5	31	-2.9	927.7	2.42447
2019-01-06 18:00:00	52	4	15	-3.1	927.9	0.9462
2019-01-06 18:15:00	9	1	4	-3.9	928.1	0.0412
2019-01-06 18:30:00	0	1	0	-4.3	928.5	0
2019-01-06 18:45:00	0	1	0	-4.7	928.6	0
2019-01-06 19:00:00	0	0	0	-5.1	928.9	0
2019-01-06 19:15:00	0	2	0	-6.5	929.2	0
2019-01-06 19:30:00	0	1	0	-7.2	929.4	0
2019-01-06 19:45:00	0	0	0	-7.2	929.6	0
2019-01-06 20:00:00	0	0	0	-7.5	929.9	0
2019-01-06 20:15:00	0	0	0	-7.4	930.2	0
2019-01-06 20:30:00	0	1	0	-8	930.4	0
2019-01-06 20:45:00	0	1	0	-8.2	930.5	0
2019-01-06 21:00:00	0	0	0	-7.8	930.7	0
2019-01-06 21:15:00	0	0	0	-7.2	930.9	0
2019-01-06 21:30:00	0	1	0	-8	930.8	0
2019-01-06 21:45:00	0	0	0	-8.2	931	0
2019-01-06 22:00:00	0	0	0	-8.1	931.1	0
2019-01-06 22:15:00	0	1	0	-8.5	931	0
2019-01-06 22:30:00	0	1	0	-9.1	931	0
2019-01-06 22:45:00	0	0	0	-8.2	931.1	0
2019-01-06 23:00:00	0	1	0	-8.9	931	0
2019-01-06 23:15:00	0	1	0	-8.9	931.1	0
2019-01-06 23:30:00	0	1	0	-9.3	931.1	0
2019-01-06 23:45:00	0	1	0	-10	931	0
2019-01-07 00:00:00	0	1	0	-10.2	930.9	0
2019-01-07 00:15:00	0	1	0	-10.8	930.8	0
2019-01-07 00:30:00	0	1	0	-11.4	931	0
2019-01-07 00:45:00	0	0	0	-11.1	930.9	0
2019-01-07 01:00:00	0	1	0	-11.9	930.9	0
2019-01-07 01:15:00	0	0	0	-12	930.9	0
2019-01-07 01:30:00	0	0	0	-12.1	931	0
2019-01-07 01:45:00	0	1	0	-12.4	930.8	0
2019-01-07 02:00:00	0	0	0	-12	930.8	0
2019-01-07 02:15:00	0	0	0	-11.8	930.9	0
2019-01-07 02:30:00	0	1	0	-12.3	931.1	0
2019-01-07 02:45:00	0	1	0	-12.5	931.1	0
2019-01-07 03:00:00	0	1	0	-12.8	931.2	0
2019-01-07 03:15:00	0	0	0	-12.7	931.2	0
2019-01-07 03:30:00	0	0	0	-12.4	931	0
2019-01-07 03:45:00	0	0	0	-12.1	931.3	0
2019-01-07 04:00:00	0	0	0	-12.1	931.3	0
2019-01-07 04:15:00	0	0	0	-12.4	931.4	0
2019-01-07 04:30:00	0	0	0	-12.4	931.4	0
2019-01-07 04:45:00	0	0	0	-12.4	931.1	0
2019-01-07 05:00:00	0	0	0	-12.6	930.9	0
2019-01-07 05:15:00	0	0	0	-12.4	931	0
2019-01-07 05:30:00	0	0	0	-12	930.9	0
2019-01-07 05:45:00	0	0	0	-12.4	930.6	0
2019-01-07 06:00:00	0	1	0	-12.6	930.6	0
2019-01-07 06:15:00	0	0	0	-12.7	930.6	0
2019-01-07 06:30:00	0	0	0	-12.8	930.5	0
2019-01-07 06:45:00	0	0	0	-12.7	930.5	0
2019-01-07 07:00:00	0	0	0	-12.3	930.7	0
2019-01-07 07:15:00	0	0	0	-12.1	930.8	0
2019-01-07 07:30:00	0	0	0	-12.2	931	0
2019-01-07 07:45:00	0	0	0	-11.7	931.2	0
2019-01-07 08:00:00	0	1	0	-12.1	931.3	0
2019-01-07 08:15:00	0	1	0	-12.6	931.2	0
2019-01-07 08:30:00	0	1	0	-12.5	931.4	0
2019-01-07 08:45:00	0	1	0	-12.7	931.4	0
2019-01-07 09:00:00	1	1	0	-12.8	931.6	0
2019-01-07 09:15:00	9	1	5	-12.8	931.7	0.139133
2019-01-07 09:30:00	72	26	17	-12.9	931.6	1.08347
2019-01-07 09:45:00	96	44	31	-13	931.5	3.2384
2019-01-07 10:00:00	285	85	49	-13	931.4	5.6312
2019-01-07 10:15:00	382	104	68	-12.1	931.3	10.048
2019-01-07 10:30:00	486	122	90	-12	931.2	17.4256
2019-01-07 10:45:00	563	101	113	-11.8	931	22.5212
2019-01-07 11:00:00	623	103	136	-11.4	930.8	25.9691
2019-01-07 11:15:00	673	102	161	-10.7	930.7	28.9485
2019-01-07 11:30:00	716	100	186	-9.6	930.5	31.4483
2019-01-07 11:45:00	760	99	213	-8.7	930.3	33.6795
2019-01-07 12:00:00	802	94	240	-8.4	930	35.4519
2019-01-07 12:15:00	837	86	265	-7.4	929.8	36.7695
2019-01-07 12:30:00	866	77	286	-6.8	929.6	38.0215
2019-01-07 12:45:00	886	68	305	-5.8	929.3	38.8554
2019-01-07 13:00:00	910	61	324	-5.7	929	39.485
2019-01-07 13:15:00	920	53	336	-5	928.6	39.8699
2019-01-07 13:30:00	931	46	352	-4	928.3	40.1054
2019-01-07 13:45:00	934	40	406	-3.7	927.8	40.1818
2019-01-07 14:00:00	924	33	390	-3.6	927.5	40.212
2019-01-07 14:15:00	905	27	335	-3.3	927.5	39.8799
2019-01-07 14:30:00	883	23	321	-3.4	927.2	39.4133
2019-01-07 14:45:00	852	19	303	-3.2	927.1	38.4687
2019-01-07 15:00:00	814	18	281	-3.1	927.1	37.2181
2019-01-07 15:15:00	777	17	258	-3.1	926.8	35.7398
2019-01-07 15:30:00	737	16	234	-3.1	926.8	34.1379
2019-01-07 15:45:00	689	15	207	-3.3	926.8	32.0883
2019-01-07 16:00:00	653	14	180	-3.2	927	29.9691
2019-01-07 16:15:00	615	14	154	-3.6	927	27.4059
2019-01-07 16:30:00	570	13	128	-3.6	927.1	24.7177
2019-01-07 16:45:00	522	12	104	-3.5	927.2	21.2251
2019-01-07 17:00:00	462	11	83	-3.8	927.1	16.1309
2019-01-07 17:15:00	389	10	65	-3.7	927.2	9.40407
2019-01-07 17:30:00	306	10	46	-4.2	927.2	5.433
2019-01-07 17:45:00	199	8	28	-4.6	927.1	2.78633
2019-01-07 18:00:00	102	1	15	-4.9	927.2	0.921067
2019-01-07 18:15:00	18	15	6	-5.1	927.3	0.059067
2019-01-07 18:30:00	0	1	0	-5.5	927.4	0
2019-01-07 18:45:00	0	1	0	-5.8	927.4	0
2019-01-07 19:00:00	0	0	0	-5.8	927.5	0
2019-01-07 19:15:00	0	1	0	-6.1	927.5	0
2019-01-07 19:30:00	0	0	0	-6.3	927.6	0
2019-01-07 19:45:00	0	0	0	-6.2	927.7	0
2019-01-07 20:00:00	0	1	0	-6.4	927.6	0
2019-01-07 20:15:00	0	1	0	-6.7	927.7	0
2019-01-07 20:30:00	0	0	0	-7	927.7	0
2019-01-07 20:45:00	0	0	0	-7.2	927.7	0
2019-01-07 21:00:00	0	0	0	-6.9	927.8	0
2019-01-07 21:15:00	0	0	0	-6.9	927.7	0
2019-01-07 21:30:00	0	1	0	-7.1	927.8	0
2019-01-07 21:45:00	0	0	0	-7.3	927.6	0
2019-01-07 22:00:00	0	0	0	-7.3	927.7	0
2019-01-07 22:15:00	0	0	0	-7.1	927.5	0
2019-01-07 22:30:00	0	0	0	-7.1	927.4	0
2019-01-07 22:45:00	0	1	0	-7.1	927.4	0
2019-01-07 23:00:00	0	0	0	-7.9	927.3	0
2019-01-07 23:15:00	0	0	0	-8	927.3	0
2019-01-07 23:30:00	0	0	0	-8.8	927	0
2019-01-07 23:45:00	0	1	0	-8.5	926.9	0
2019-01-08 00:00:00	0	1	0	-9.7	926.8	0
2019-01-08 00:15:00	0	0	0	-9.8	926.7	0
2019-01-08 00:30:00	0	0	0	-9.7	926.6	0
2019-01-08 00:45:00	0	2	0	-10.6	926.3	0
2019-01-08 01:00:00	0	1	0	-11	926.1	0
2019-01-08 01:15:00	0	0	0	-11	925.9	0
2019-01-08 01:30:00	0	0	0	-10.2	925.7	0
2019-01-08 01:45:00	0	1	0	-10.8	925.5	0
2019-01-08 02:00:00	0	0	0	-10.3	925.4	0
2019-01-08 02:15:00	0	3	0	-12	925.3	0
2019-01-08 02:30:00	0	1	0	-11.3	925.3	0
2019-01-08 02:45:00	0	0	0	-11.9	925.2	0
2019-01-08 03:00:00	0	1	0	-12.1	925.2	0
2019-01-08 03:15:00	0	1	0	-11.7	925.1	0
2019-01-08 03:30:00	0	0	0	-10.5	925	0
2019-01-08 03:45:00	0	1	0	-11.4	925.1	0
2019-01-08 04:00:00	0	1	0	-11.7	924.9	0
2019-01-08 04:15:00	0	0	0	-11.1	924.8	0
2019-01-08 04:30:00	0	0	0	-10.2	924.7	0
2019-01-08 04:45:00	0	0	0	-9.6	924.6	0
2019-01-08 05:00:00	0	1	0	-9.9	924.3	0
2019-01-08 05:15:00	0	0	0	-10	924.2	0
2019-01-08 05:30:00	0	1	0	-10.9	924	0
2019-01-08 05:45:00	0	0	0	-10.9	924	0
2019-01-08 06:00:00	0	1	0	-11.7	923.9	0
2019-01-08 06:15:00	0	0	0	-10.9	923.8	0
2019-01-08 06:30:00	0	0	0	-10.7	923.6	0
2019-01-08 06:45:00	0	1	0	-11.1	923.6	0
2019-01-08 07:00:00	0	0	0	-11.5	923.5	0
2019-01-08 07:15:00	0	1	0	-11.8	923.5	0
2019-01-08 07:30:00	0	0	0	-11.2	923.5	0
2019-01-08 07:45:00	0	1	0	-11.2	923.4	0
2019-01-08 08:00:00	0	0	0	-10.6	923.5	0
2019-01-08 08:15:00	0	0	0	-10.6	923.3	0
2019-01-08 08:30:00	0	0	0	-11.5	923.3	0
2019-01-08 08:45:00	0	1	0	-12.4	923.2	0
2019-01-08 09:00:00	1	2	1	-13.6	923.4	0
2019-01-08 09:15:00	17	10	7	-14.2	923.5	0.240667
2019-01-08 09:30:00	101	117	16	-12.8	923.7	1.33707
2019-01-08 09:45:00	156	231	27	-12.7	923.6	3.98147
2019-01-08 10:00:00	310	335	39	-12.5	923.4	6.42727
2019-01-08 10:15:00	408	410	51	-11.7	923.3	11.5695
2019-01-08 10:30:00	490	468	64	-11	923	18.8131
2019-01-08 10:45:00	562	520	78	-10.3	922.7	22.9473
2019-01-08 11:00:00	617	560	92	-9.7	922.6	25.9396
2019-01-08 11:15:00	664	592	108	-9.2	922.3	28.6397
2019-01-08 11:30:00	705	621	124	-8	922	31.0269
2019-01-08 11:45:00	745	651	140	-7.2	922	32.9461
2019-01-08 12:00:00	782	674	154	-5.5	921.6	34.7084
2019-01-08 12:15:00	818	696	172	-5.5	921.3	36.1848
2019-01-08 12:30:00	853	712	192	-5.6	921.2	37.5943
2019-01-08 12:45:00	884	723	209	-5.5	920.8	38.7481
2019-01-08 13:00:00	910	734	226	-6.1	920.7	39.6869
2019-01-08 13:15:00	928	744	239	-5.6	920.7	40.2742
2019-01-08 13:30:00	946	760	256	-5.7	920.4	40.7987
2019-01-08 13:45:00	953	769	314	-5.8	920.3	40.9697
2019-01-08 14:00:00	949	780	308	-5.6	920.3	40.8563
2019-01-08 14:15:00	936	786	260	-4.9	920.1	40.4623
2019-01-08 14:30:00	913	783	252	-5.1	919.9	39.1185
2019-01-08 14:45:00	801	656	230	-4.6	919.9	35.7359
2019-01-08 15:00:00	817	708	236	-4.4	919.9	36.0541
2019-01-08 15:15:00	834	744	244	-4.1	919.6	36.1949
2019-01-08 15:30:00	763	740	199	-4.2	919.5	34.3525
2019-01-08 15:45:00	713	716	179	-4.3	919.7	32.3375
2019-01-08 16:00:00	673	693	159	-3.9	919.6	29.6971
2019-01-08 16:15:00	483	324	114	-4	919.6	26.8108
2019-01-08 16:30:00	568	428	117	-3.7	919.5	24.0063
2019-01-08 16:45:00	527	529	108	-3.7	919.6	16.3193
2019-01-08 17:00:00	243	150	80	-3.9	919.5	7.20593
2019-01-08 17:15:00	297	241	69	-3.9	919.6	6.27033
2019-01-08 17:30:00	148	132	46	-4.3	919.8	3.34853
2019-01-08 17:45:00	57	19	22	-4.5	920	1.46827
2019-01-08 18:00:00	50	43	13	-4.6	920.1	0.6198
2019-01-08 18:15:00	13	9	5	-4.9	920.3	0.044133
2019-01-08 18:30:00	0	1	0	-4.9	920.4	0
2019-01-08 18:45:00	0	0	0	-5.4	920.4	0
2019-01-08 19:00:00	0	1	0	-6.4	920.5	0
2019-01-08 19:15:00	0	0	0	-6.7	920.8	0
2019-01-08 19:30:00	0	0	0	-7.1	920.9	0
2019-01-08 19:45:00	0	1	0	-7.7	921.1	0
2019-01-08 20:00:00	0	0	0	-7.3	921.2	0
2019-01-08 20:15:00	0	0	0	-7.2	921.1	0
2019-01-08 20:30:00	0	0	0	-7	921.4	0
2019-01-08 20:45:00	0	1	0	-7.3	921.4	0
2019-01-08 21:00:00	0	1	0	-7.4	921.3	0
2019-01-08 21:15:00	0	0	0	-7.4	921.4	0
2019-01-08 21:30:00	0	0	0	-7.5	921.3	0
2019-01-08 21:45:00	0	1	0	-8.9	921.4	0
2019-01-08 22:00:00	0	1	0	-8.2	921.1	0
2019-01-08 22:15:00	0	1	0	-8.4	921	0
2019-01-08 22:30:00	0	0	0	-8.2	921	0
2019-01-08 22:45:00	0	0	0	-8.2	921.2	0
2019-01-08 23:00:00	0	0	0	-8	921	0
2019-01-08 23:15:00	0	0	0	-8.3	921	0
2019-01-08 23:30:00	0	1	0	-8.5	920.9	0
2019-01-08 23:45:00	0	0	0	-7.9	920.8	0
2019-01-09 00:00:00	0	1	0	-8.7	921	0
2019-01-09 00:15:00	0	1	0	-9.5	921	0
2019-01-09 00:30:00	0	1	0	-9.9	921.3	0
2019-01-09 00:45:00	0	0	0	-10	921.1	0
2019-01-09 01:00:00	0	0	0	-9.2	921.3	0
2019-01-09 01:15:00	0	0	0	-9.4	921.3	0
2019-01-09 01:30:00	0	1	0	-10.6	921.3	0
2019-01-09 01:45:00	0	1	0	-11.1	921.2	0
2019-01-09 02:00:00	0	0	0	-10.5	921.3	0
2019-01-09 02:15:00	0	1	0	-10.4	921.3	0
2019-01-09 02:30:00	0	1	0	-10.8	921.4	0
2019-01-09 02:45:00	0	0	0	-10.9	921.4	0
2019-01-09 03:00:00	0	0	0	-11.2	921.5	0
2019-01-09 03:15:00	0	1	0	-11.8	921.6	0
2019-01-09 03:30:00	0	1	0	-11.9	921.9	0
2019-01-09 03:45:00	0	0	0	-12.1	922	0
2019-01-09 04:00:00	0	0	0	-11.2	922.1	0
2019-01-09 04:15:00	0	0	0	-11.4	922.3	0
2019-01-09 04:30:00	0	0	0	-11.3	922.3	0
2019-01-09 04:45:00	0	0	0	-11.2	922.3	0
2019-01-09 05:00:00	0	1	0	-11.4	922.4	0
2019-01-09 05:15:00	0	0	0	-11.3	922.4	0
2019-01-09 05:30:00	0	0	0	-11.5	922.4	0
2019-01-09 05:45:00	0	0	0	-11.2	922.6	0
2019-01-09 06:00:00	0	0	0	-11.3	922.6	0
2019-01-09 06:15:00	0	1	0	-11.7	922.7	0
2019-01-09 06:30:00	0	1	0	-11.9	922.7	0
2019-01-09 06:45:00	0	1	0	-11.7	923	0
2019-01-09 07:00:00	0	0	0	-11.3	923.1	0
2019-01-09 07:15:00	0	1	0	-11.4	923.3	0
2019-01-09 07:30:00	0	1	0	-11.7	923.3	0
2019-01-09 07:45:00	0	0	0	-11.8	923.5	0
2019-01-09 08:00:00	0	0	0	-11.7	923.6	0
2019-01-09 08:15:00	0	0	0	-11.2	923.8	0
2019-01-09 08:30:00	0	0	0	-11.3	923.8	0
2019-01-09 08:45:00	0	0	0	-11.5	923.8	0
2019-01-09 09:00:00	1	0	0	-11.2	924.1	0
2019-01-09 09:15:00	8	1	5	-11.5	924.3	0.089333
2019-01-09 09:30:00	33	9	16	-11.6	924.4	0.802133
2019-01-09 09:45:00	69	30	25	-11.2	924.6	1.64213
2019-01-09 10:00:00	112	44	38	-10.7	924.7	3.67113
2019-01-09 10:15:00	313	247	56	-10.4	924.7	8.92787
2019-01-09 10:30:00	408	311	70	-10.1	924.6	15.502
2019-01-09 10:45:00	476	351	81	-9.6	924.6	19.8216
2019-01-09 11:00:00	551	403	95	-8.9	924.4	22.8117
2019-01-09 11:15:00	594	427	108	-7.8	924.4	25.5878
2019-01-09 11:30:00	607	424	116	-6.6	924.3	23.7918
2019-01-09 11:45:00	674	468	134	-5.5	924.1	19.4291
2019-01-09 12:00:00	728	503	148	-4.8	923.9	17.3291
2019-01-09 12:15:00	759	515	161	-5	923.9	14.8684
2019-01-09 12:30:00	788	522	175	-4.6	923.8	12.9444
2019-01-09 12:45:00	819	536	186	-4.1	923.6	11.4322
2019-01-09 13:00:00	839	549	194	-3.3	923.4	11.25
2019-01-09 13:15:00	862	562	204	-3.2	923.2	11.7791
2019-01-09 13:30:00	875	576	217	-3	923.1	12.8603
2019-01-09 13:45:00	875	575	258	-2.9	922.9	14.2535
2019-01-09 14:00:00	875	582	256	-3.4	922.9	16.2498
2019-01-09 14:15:00	866	586	224	-4.3	922.9	16.4179
2019-01-09 14:30:00	841	578	218	-4.3	923	15.375
2019-01-09 14:45:00	811	567	212	-4	923	14.8068
2019-01-09 15:00:00	761	546	199	-3.9	923	14.7723
2019-01-09 15:15:00	738	560	189	-4	923	15.7134
2019-01-09 15:30:00	695	544	175	-3.2	922.9	18.3519
2019-01-09 15:45:00	658	543	162	-3.2	922.9	21.1644
2019-01-09 16:00:00	616	521	147	-2.9	922.8	22.8305
2019-01-09 16:15:00	562	327	127	-2.3	922.8	23.2513
2019-01-09 16:30:00	508	309	109	-3.4	923.1	21.0988
2019-01-09 16:45:00	443	277	92	-3.6	923	17.3771
2019-01-09 17:00:00	375	255	77	-3.8	923.3	13.0217
2019-01-09 17:15:00	311	226	63	-4.1	923.3	8.31353
2019-01-09 17:30:00	230	192	48	-4.4	923.4	4.7272
2019-01-09 17:45:00	147	118	33	-4.7	923.7	2.65327
2019-01-09 18:00:00	66	42	19	-5	923.9	1.1404
2019-01-09 18:15:00	15	3	7	-5.6	924	0.108133
2019-01-09 18:30:00	1	1	0	-5.9	924.2	0
2019-01-09 18:45:00	0	1	0	-6	924.6	0
2019-01-09 19:00:00	0	1	0	-6.2	924.8	0
2019-01-09 19:15:00	0	0	0	-6.4	925	0
2019-01-09 19:30:00	0	1	0	-6.4	925.2	0
2019-01-09 19:45:00	0	1	0	-6.7	925.3	0
2019-01-09 20:00:00	0	0	0	-6.6	925.4	0
2019-01-09 20:15:00	0	0	0	-6.4	925.5	0
2019-01-09 20:30:00	0	1	0	-7.1	925.6	0
2019-01-09 20:45:00	0	0	0	-7.1	925.7	0
2019-01-09 21:00:00	0	1	0	-7.7	925.7	0
2019-01-09 21:15:00	0	0	0	-7.9	925.9	0
2019-01-09 21:30:00	0	1	0	-8.4	926	0
2019-01-09 21:45:00	0	0	0	-8.3	926.1	0
2019-01-09 22:00:00	0	0	0	-8.7	926	0
2019-01-09 22:15:00	0	0	0	-8.7	926	0
2019-01-09 22:30:00	0	0	0	-8.6	926	0
2019-01-09 22:45:00	0	1	0	-8.8	925.9	0
2019-01-09 23:00:00	0	0	0	-9.1	925.9	0
2019-01-09 23:15:00	0	0	0	-9.5	925.9	0
2019-01-09 23:30:00	0	0	0	-9.7	926	0
2019-01-09 23:45:00	0	1	0	-10.3	926	0
2019-01-10 00:00:00	0	1	0	-10.4	926.1	0
2019-01-10 00:15:00	0	0	0	-10.9	926.2	0
2019-01-10 00:30:00	0	0	0	-10.7	926.2	0
2019-01-10 00:45:00	0	0	0	-10.9	926.2	0
2019-01-10 01:00:00	0	1	0	-11.3	926.2	0
2019-01-10 01:15:00	0	0	0	-11.1	926	0
2019-01-10 01:30:00	0	0	0	-11	926	0
2019-01-10 01:45:00	0	0	0	-10.5	925.8	0
2019-01-10 02:00:00	0	0	0	-10.2	925.8	0
2019-01-10 02:15:00	0	1	0	-10.3	925.6	0
2019-01-10 02:30:00	0	1	0	-11.2	925.5	0
2019-01-10 02:45:00	0	0	0	-11.6	925.5	0
2019-01-10 03:00:00	0	1	0	-12	925.5	0
2019-01-10 03:15:00	0	0	0	-11.6	925.5	0
2019-01-10 03:30:00	0	0	0	-11.5	925.5	0
2019-01-10 03:45:00	0	1	0	-11.7	925.5	0
2019-01-10 04:00:00	0	0	0	-11.4	925.5	0
2019-01-10 04:15:00	0	0	0	-11.5	925.4	0
2019-01-10 04:30:00	0	0	0	-11.5	925.5	0
2019-01-10 04:45:00	0	1	0	-11.9	925.4	0
2019-01-10 05:00:00	0	1	0	-12.2	925.3	0
2019-01-10 05:15:00	0	1	0	-12.3	925.2	0
2019-01-10 05:30:00	0	0	0	-12.1	925	0
2019-01-10 05:45:00	0	1	0	-12.2	924.8	0
2019-01-10 06:00:00	0	0	0	-12	924.8	0
2019-01-10 06:15:00	0	0	0	-12	924.7	0
2019-01-10 06:30:00	0	0	0	-12.1	924.5	0
2019-01-10 06:45:00	0	0	0	-11.5	924.6	0
2019-01-10 07:00:00	0	0	0	-11.9	924.6	0
2019-01-10 07:15:00	0	0	0	-11.3	924.5	0
2019-01-10 07:30:00	0	1	0	-11.8	924.7	0
2019-01-10 07:45:00	0	0	0	-12	924.7	0
2019-01-10 08:00:00	0	1	0	-11.9	924.7	0
2019-01-10 08:15:00	0	1	0	-12.5	924.7	0
2019-01-10 08:30:00	0	1	0	-12.3	924.9	0
2019-01-10 08:45:00	0	0	0	-12.5	925	0
2019-01-10 09:00:00	3	0	2	-12.4	925.1	0
2019-01-10 09:15:00	15	1	8	-12.6	925	0.287333
2019-01-10 09:30:00	47	21	19	-12.9	925	1.017
2019-01-10 09:45:00	97	45	34	-12.2	925	2.84787
2019-01-10 10:00:00	237	159	50	-12	925	5.1658
2019-01-10 10:15:00	267	180	51	-12.3	925	7.12733
2019-01-10 10:30:00	430	309	70	-11.9	925	15.8931
2019-01-10 10:45:00	520	377	80	-11.2	924.8	20.7631
2019-01-10 11:00:00	583	423	89	-10.3	924.3	24.0738
2019-01-10 11:15:00	635	458	98	-9.9	924.2	27.0431
2019-01-10 11:30:00	682	491	108	-9.2	923.9	29.5832
2019-01-10 11:45:00	723	515	117	-8.1	923.6	31.7751
2019-01-10 12:00:00	759	537	126	-7	923.2	33.1897
2019-01-10 12:15:00	802	563	135	-6	922.9	34.9555
2019-01-10 12:30:00	837	584	143	-4.8	922.5	36.0878
2019-01-10 12:45:00	867	600	152	-4.7	922	36.4845
2019-01-10 13:00:00	908	623	164	-3.7	921.7	38.0893
2019-01-10 13:15:00	885	591	169	-4.3	921.2	36.9872
2019-01-10 13:30:00	911	589	191	-4.3	920.9	36.3607
2019-01-10 13:45:00	829	502	236	-4.6	920.7	34.9808
2019-01-10 14:00:00	709	397	217	-4.4	920.4	32.7363
2019-01-10 14:15:00	523	229	174	-4.4	920.3	24.3645
2019-01-10 14:30:00	519	193	208	-4.5	920.3	22.5704
2019-01-10 14:45:00	493	174	218	-4.4	920.1	26.2853
2019-01-10 15:00:00	917	632	276	-3.6	919.9	31.4365
2019-01-10 15:15:00	485	223	167	-4.2	919.6	19.5971
2019-01-10 15:30:00	546	273	206	-4	919.6	25.4456
2019-01-10 15:45:00	537	331	170	-3.8	919.4	21.6675
2019-01-10 16:00:00	555	369	158	-3.9	919.4	23.8087
2019-01-10 16:15:00	638	335	159	-3.8	919.5	22.946
2019-01-10 16:30:00	460	235	134	-4.2	919.3	17.5424
2019-01-10 16:45:00	121	6	73	-4.3	919.2	6.4576
2019-01-10 17:00:00	228	86	89	-4.2	919.2	12.8389
2019-01-10 17:15:00	411	267	116	-3.9	919.4	11.9242
2019-01-10 17:30:00	150	78	56	-4.4	919.4	4.92607
2019-01-10 17:45:00	161	138	33	-4.5	919.4	2.80907
2019-01-10 18:00:00	83	60	22	-4.8	919.3	1.44987
2019-01-10 18:15:00	23	6	9	-5.4	919.5	0.262733
2019-01-10 18:30:00	3	1	1	-5.9	919.6	0
2019-01-10 18:45:00	0	0	0	-6.1	919.8	0
2019-01-10 19:00:00	0	0	0	-6.1	919.9	0
2019-01-10 19:15:00	0	1	0	-6.3	919.9	0
2019-01-10 19:30:00	0	1	0	-6.7	920	0
2019-01-10 19:45:00	0	0	0	-6.9	920.1	0
2019-01-10 20:00:00	0	1	0	-7	920.2	0
2019-01-10 20:15:00	0	1	0	-7.3	920.3	0
2019-01-10 20:30:00	0	0	0	-7.2	920.3	0
2019-01-10 20:45:00	0	0	0	-6.9	920.3	0
2019-01-10 21:00:00	0	1	0	-7.3	920.3	0
2019-01-10 21:15:00	0	0	0	-7.2	920.3	0
2019-01-10 21:30:00	0	1	0	-7.6	920.2	0
2019-01-10 21:45:00	0	0	0	-7.5	920.2	0
2019-01-10 22:00:00	0	0	0	-8.1	920.2	0
2019-01-10 22:15:00	0	1	0	-8	920.1	0
2019-01-10 22:30:00	0	0	0	-8	920.1	0
2019-01-10 22:45:00	0	1	0	-8.3	920.2	0
2019-01-10 23:00:00	0	1	0	-8.4	920.2	0
2019-01-10 23:15:00	0	1	0	-9.2	920.1	0
2019-01-10 23:30:00	0	0	0	-9.5	919.9	0
2019-01-10 23:45:00	0	0	0	-9.8	919.8	0
2019-01-11 00:00:00	0	1	0	-9.9	919.7	0
2019-01-11 00:15:00	0	0	0	-10	919.7	0
2019-01-11 00:30:00	0	0	0	-10.1	919.6	0
2019-01-11 00:45:00	0	1	0	-10.7	919.4	0
2019-01-11 01:00:00	0	0	0	-11.1	919.3	0
2019-01-11 01:15:00	0	0	0	-10.9	919.2	0
2019-01-11 01:30:00	0	1	0	-11.2	919.2	0
2019-01-11 01:45:00	0	1	0	-11.5	919	0
2019-01-11 02:00:00	0	1	0	-11.7	919	0
2019-01-11 02:15:00	0	0	0	-11.3	918.7	0
2019-01-11 02:30:00	0	0	0	-11.1	918.8	0
2019-01-11 02:45:00	0	1	0	-11.5	918.7	0
2019-01-11 03:00:00	0	0	0	-11.5	918.5	0
2019-01-11 03:15:00	0	0	0	-11.5	918.5	0
2019-01-11 03:30:00	0	0	0	-11.4	918.5	0
2019-01-11 03:45:00	0	0	0	-11.4	918.5	0
2019-01-11 04:00:00	0	1	0	-11.6	918.6	0
2019-01-11 04:15:00	0	0	0	-11.4	918.6	0
2019-01-11 04:30:00	0	0	0	-11.6	918.4	0
2019-01-11 04:45:00	0	0	0	-11.5	918.4	0
2019-01-11 05:00:00	0	0	0	-11.8	918.4	0
2019-01-11 05:15:00	0	1	0	-11.9	918.5	0
2019-01-11 05:30:00	0	0	0	-12	918.3	0
2019-01-11 05:45:00	0	0	0	-11.9	918.1	0
2019-01-11 06:00:00	0	0	0	-11.9	918	0
2019-01-11 06:15:00	0	1	0	-11.8	918	0
2019-01-11 06:30:00	0	0	0	-11.3	918	0
2019-01-11 06:45:00	0	0	0	-12	918	0
2019-01-11 07:00:00	0	0	0	-11.7	918	0
2019-01-11 07:15:00	0	0	0	-11.6	918	0
2019-01-11 07:30:00	0	1	0	-11.5	918.1	0
2019-01-11 07:45:00	0	1	0	-11.8	918.4	0
2019-01-11 08:00:00	0	1	0	-12.3	918.5	0
2019-01-11 08:15:00	0	1	0	-12.6	918.8	0
2019-01-11 08:30:00	0	0	0	-12.3	919	0
2019-01-11 08:45:00	0	0	0	-13	919.4	0
2019-01-11 09:00:00	1	0	0	-12.7	919.6	0
2019-01-11 09:15:00	7	0	5	-11.9	919.9	0.0618
2019-01-11 09:30:00	67	47	19	-12.6	920.2	1.13533
2019-01-11 09:45:00	50	21	18	-12	920.7	1.541
2019-01-11 10:00:00	143	94	35	-11.8	920.7	4.2748
2019-01-11 10:15:00	352	270	52	-11.8	920.9	9.65187
2019-01-11 10:30:00	430	318	61	-11.5	921	16.5439
2019-01-11 10:45:00	505	363	70	-10.9	920.9	20.3635
2019-01-11 11:00:00	566	401	78	-10.7	920.8	23.6253
2019-01-11 11:15:00	619	438	87	-10.2	920.6	26.4484
2019-01-11 11:30:00	668	470	95	-9.7	920.6	29.0784
2019-01-11 11:45:00	710	497	103	-8.9	920.6	31.2017
2019-01-11 12:00:00	752	523	108	-7.5	920.5	32.9265
2019-01-11 12:15:00	793	549	116	-7.2	920.3	34.5881
2019-01-11 12:30:00	827	567	122	-6.6	920.2	36.1394
2019-01-11 12:45:00	864	590	128	-6.2	920.1	37.3493
2019-01-11 13:00:00	893	609	134	-5.7	919.9	38.2753
2019-01-11 13:15:00	912	623	139	-4.8	919.7	38.8561
2019-01-11 13:30:00	928	644	149	-4.5	919.5	39.0271
2019-01-11 13:45:00	934	655	197	-4.5	919.4	39.1715
2019-01-11 14:00:00	935	666	185	-4.6	919.3	39.3254
2019-01-11 14:15:00	919	671	155	-4.9	919.2	39.0473
2019-01-11 14:30:00	902	681	150	-4.5	919.4	38.3949
2019-01-11 14:45:00	870	680	147	-4.8	919.2	37.5021
2019-01-11 15:00:00	833	675	143	-4.5	919.3	36.2089
2019-01-11 15:15:00	795	667	137	-4.6	919.3	34.721
2019-01-11 15:30:00	755	661	131	-4.4	919.2	33.2729
2019-01-11 15:45:00	710	643	122	-4.3	919.2	31.4136
2019-01-11 16:00:00	674	632	112	-4.1	919.1	29.2879
2019-01-11 16:15:00	623	388	102	-4.1	919.2	26.7003
2019-01-11 16:30:00	577	383	90	-4.3	919.2	23.7901
2019-01-11 16:45:00	523	368	78	-3.9	919.2	20.6192
2019-01-11 17:00:00	458	367	65	-4.2	919.3	16.4619
2019-01-11 17:15:00	380	322	54	-4.1	919.2	10.6099
2019-01-11 17:30:00	287	267	42	-4.3	919.5	5.68313
2019-01-11 17:45:00	192	188	30	-4.5	919.7	3.1142
2019-01-11 18:00:00	93	88	18	-4.8	919.7	1.28947
2019-01-11 18:15:00	22	12	8	-5.2	919.8	0.214267
2019-01-11 18:30:00	2	1	0	-5.5	920	0
2019-01-11 18:45:00	0	1	0	-5.8	920.2	0
2019-01-11 19:00:00	0	0	0	-6.1	920.5	0
2019-01-11 19:15:00	0	0	0	-6.3	920.5	0
2019-01-11 19:30:00	0	0	0	-6.5	920.6	0
2019-01-11 19:45:00	0	1	0	-6.6	920.6	0
2019-01-11 20:00:00	0	0	0	-7.1	920.6	0
2019-01-11 20:15:00	0	0	0	-6.8	920.6	0
2019-01-11 20:30:00	0	0	0	-7	920.7	0
2019-01-11 20:45:00	0	0	0	-7.3	920.6	0
2019-01-11 21:00:00	0	0	0	-7.1	920.7	0
2019-01-11 21:15:00	0	0	0	-6.9	920.8	0
2019-01-11 21:30:00	0	0	0	-6.8	920.7	0
2019-01-11 21:45:00	0	0	0	-6.6	920.6	0
2019-01-11 22:00:00	0	1	0	-8	920.7	0
2019-01-11 22:15:00	0	0	0	-8.5	920.8	0
2019-01-11 22:30:00	0	0	0	-8.6	920.8	0
2019-01-11 22:45:00	0	0	0	-8.7	920.9	0
2019-01-11 23:00:00	0	1	0	-8.6	921	0
2019-01-11 23:15:00	0	0	0	-8.2	921	0
2019-01-11 23:30:00	0	0	0	-7.1	921	0
2019-01-11 23:45:00	0	3	0	-7.9	920.9	0
2019-01-12 00:00:00	0	1	0	-9.9	920.8	0
2019-01-12 00:15:00	0	0	0	-9.4	920.9	0
2019-01-12 00:30:00	0	0	0	-10	921	0
2019-01-12 00:45:00	0	2	0	-10.6	921	0
2019-01-12 01:00:00	0	0	0	-11.1	921.1	0
2019-01-12 01:15:00	0	0	0	-9	921	0
2019-01-12 01:30:00	0	2	0	-11	920.8	0
2019-01-12 01:45:00	0	0	0	-10.7	920.8	0
2019-01-12 02:00:00	0	0	0	-10.6	921	0
2019-01-12 02:15:00	0	0	0	-9.3	920.9	0
2019-01-12 02:30:00	0	0	0	-7.9	920.9	0
2019-01-12 02:45:00	0	0	0	-6.8	920.7	0
2019-01-12 03:00:00	0	2	0	-7	920.6	0
2019-01-12 03:15:00	0	0	0	-7.8	920.6	0
2019-01-12 03:30:00	0	4	0	-11.7	920.8	0
2019-01-12 03:45:00	0	2	0	-11.6	921	0
2019-01-12 04:00:00	0	0	0	-10.7	921	0
2019-01-12 04:15:00	0	1	0	-12.4	920.8	0
2019-01-12 04:30:00	0	0	0	-10.7	920.8	0
2019-01-12 04:45:00	0	0	0	-9	920.8	0
2019-01-12 05:00:00	0	2	0	-11.5	920.5	0
2019-01-12 05:15:00	0	1	0	-11.7	920.6	0
2019-01-12 05:30:00	0	0	0	-11.7	920.5	0
2019-01-12 05:45:00	0	2	0	-12.5	920.7	0
2019-01-12 06:00:00	0	0	0	-12.4	920.9	0
2019-01-12 06:15:00	0	1	0	-12.5	921	0
2019-01-12 06:30:00	0	0	0	-12.6	921	0
2019-01-12 06:45:00	0	1	0	-12.7	921.3	0
2019-01-12 07:00:00	0	0	0	-12.3	921.6	0
2019-01-12 07:15:00	0	0	0	-12.1	921.7	0
2019-01-12 07:30:00	0	0	0	-12.4	921.8	0
2019-01-12 07:45:00	0	2	0	-12.9	922.1	0
2019-01-12 08:00:00	0	1	0	-13.8	922.2	0
2019-01-12 08:15:00	0	0	0	-13.4	922.5	0
2019-01-12 08:30:00	0	0	0	-13.5	922.7	0
2019-01-12 08:45:00	0	0	0	-12.6	922.9	0
2019-01-12 09:00:00	5	0	2	-11.7	923.1	0
2019-01-12 09:15:00	23	8	9	-12.4	923.2	0.436133
2019-01-12 09:30:00	98	72	25	-11.7	923.3	1.76427
2019-01-12 09:45:00	201	159	36	-10.7	923.4	4.0692
2019-01-12 10:00:00	308	237	44	-10.7	923.4	6.5324
2019-01-12 10:15:00	323	213	50	-10.8	923.1	11.1941
2019-01-12 10:30:00	488	349	54	-11.4	923.2	18.4569
2019-01-12 10:45:00	553	390	59	-11.1	923.3	22.2585
2019-01-12 11:00:00	612	422	66	-10.9	923.2	25.5395
2019-01-12 11:15:00	662	451	72	-9.8	923.4	28.2253
2019-01-12 11:30:00	703	476	77	-8.5	923.6	30.5853
2019-01-12 11:45:00	743	503	81	-7.2	923.4	32.7278
2019-01-12 12:00:00	784	527	86	-7.4	922.9	34.5232
2019-01-12 12:15:00	822	548	92	-6.8	922.9	36.0281
2019-01-12 12:30:00	859	580	96	-6.3	922.8	37.3967
2019-01-12 12:45:00	891	620	100	-5.8	922.5	38.3402
2019-01-12 13:00:00	918	638	105	-5.4	922.3	39.0771
2019-01-12 13:15:00	943	657	109	-5.2	922.1	39.6893
2019-01-12 13:30:00	957	676	120	-5.1	922	40.0301
2019-01-12 13:45:00	962	686	167	-4.3	921.8	39.9967
2019-01-12 14:00:00	964	702	156	-5.2	921.7	39.9656
2019-01-12 14:15:00	950	703	126	-5.3	921.7	39.8413
2019-01-12 14:30:00	922	700	124	-5.1	921.7	39.1507
2019-01-12 14:45:00	896	705	122	-5	921.9	38.2943
2019-01-12 15:00:00	855	702	117	-4.6	921.7	37.1572
2019-01-12 15:15:00	813	691	115	-4.5	921.5	35.5383
2019-01-12 15:30:00	769	680	110	-4.3	921.6	33.6806
2019-01-12 15:45:00	717	655	105	-4.2	921.6	31.4633
2019-01-12 16:00:00	672	626	100	-4.2	921.8	29.2787
2019-01-12 16:15:00	630	382	92	-4.1	921.9	26.5777
2019-01-12 16:30:00	584	381	83	-4	922	23.8463
2019-01-12 16:45:00	532	368	73	-4	922.1	20.7455
2019-01-12 17:00:00	450	351	62	-4	921.9	16.0612
2019-01-12 17:15:00	394	327	54	-4	922	11.1071
2019-01-12 17:30:00	309	285	43	-4.2	922.1	5.45747
2019-01-12 17:45:00	195	186	31	-4.5	922.1	2.52053
2019-01-12 18:00:00	32	13	12	-4.8	922.5	0.6234
2019-01-12 18:15:00	16	7	6	-5.4	922.5	0.0632
2019-01-12 18:30:00	1	1	0	-5.9	922.9	0
2019-01-12 18:45:00	0	1	0	-6.2	923.1	0
2019-01-12 19:00:00	0	0	0	-6.4	923.2	0
2019-01-12 19:15:00	0	1	0	-6.8	923.5	0
2019-01-12 19:30:00	0	0	0	-7.2	923.7	0
2019-01-12 19:45:00	0	0	0	-7	923.9	0
2019-01-12 20:00:00	0	0	0	-6.6	923.8	0
2019-01-12 20:15:00	0	0	0	-7.4	924	0
2019-01-12 20:30:00	0	1	0	-7.4	924.1	0
2019-01-12 20:45:00	0	0	0	-7.4	924.3	0
2019-01-12 21:00:00	0	0	0	-7.5	924.4	0
2019-01-12 21:15:00	0	0	0	-7.5	924.3	0
2019-01-12 21:30:00	0	1	0	-7.6	924.4	0
2019-01-12 21:45:00	0	1	0	-8.4	924.5	0
2019-01-12 22:00:00	0	0	0	-8.2	924.5	0
2019-01-12 22:15:00	0	0	0	-8	924.5	0
2019-01-12 22:30:00	0	0	0	-8	924.7	0
2019-01-12 22:45:00	0	0	0	-7.9	925	0
2019-01-12 23:00:00	0	0	0	-8.2	925	0
2019-01-12 23:15:00	0	0	0	-8.3	924.9	0
2019-01-12 23:30:00	0	1	0	-8.7	925	0
2019-01-12 23:45:00	0	0	0	-8.7	925.1	0
2019-01-13 00:00:00	0	0	0	-8.7	924.9	0
2019-01-13 00:15:00	0	1	0	-8.8	925.1	0
2019-01-13 00:30:00	0	1	0	-10.8	925	0
2019-01-13 00:45:00	0	0	0	-10.7	924.9	0
2019-01-13 01:00:00	0	0	0	-9.7	924.9	0
2019-01-13 01:15:00	0	1	0	-10	925	0
2019-01-13 01:30:00	0	1	0	-10.1	925.1	0
2019-01-13 01:45:00	0	0	0	-9.9	925.2	0
2019-01-13 02:00:00	0	0	0	-10.4	925.2	0
2019-01-13 02:15:00	0	2	0	-12.1	925.3	0
2019-01-13 02:30:00	0	0	0	-12.5	925.3	0
2019-01-13 02:45:00	0	1	0	-12.5	925.6	0
2019-01-13 03:00:00	0	1	0	-12.4	925.4	0
2019-01-13 03:15:00	0	0	0	-12.3	925.4	0
2019-01-13 03:30:00	0	0	0	-11.6	925	0
2019-01-13 03:45:00	0	0	0	-10.8	925.2	0
2019-01-13 04:00:00	0	0	0	-10.5	925.3	0
2019-01-13 04:15:00	0	3	0	-13.5	925.3	0
2019-01-13 04:30:00	0	0	0	-12.8	925.6	0
2019-01-13 04:45:00	0	0	0	-12.6	925.5	0
2019-01-13 05:00:00	0	0	0	-13.8	925.8	0
2019-01-13 05:15:00	0	0	0	-13.7	925.7	0
2019-01-13 05:30:00	0	0	0	-13.5	925.8	0
2019-01-13 05:45:00	0	0	0	-13.1	925.8	0
2019-01-13 06:00:00	0	0	0	-11.9	925.7	0
2019-01-13 06:15:00	0	1	0	-11.9	925.8	0
2019-01-13 06:30:00	0	1	0	-12.4	925.6	0
2019-01-13 06:45:00	0	1	0	-12.8	925.5	0
2019-01-13 07:00:00	0	0	0	-11.9	925.7	0
2019-01-13 07:15:00	0	1	0	-12.5	925.9	0
2019-01-13 07:30:00	0	1	0	-13.3	926.3	0
2019-01-13 07:45:00	0	0	0	-13.9	926.6	0
2019-01-13 08:00:00	0	0	0	-13.6	926.9	0
2019-01-13 08:15:00	0	0	0	-13.9	927	0
2019-01-13 08:30:00	0	0	0	-13.1	927	0
2019-01-13 08:45:00	0	1	0	-13.6	927.2	0
2019-01-13 09:00:00	6	2	3	-14.1	927.2	0.0178
2019-01-13 09:15:00	27	5	14	-14.1	927.3	0.697733
2019-01-13 09:30:00	113	60	38	-13.8	927.4	2.3432
2019-01-13 09:45:00	173	86	55	-13.9	927.3	4.524
2019-01-13 10:00:00	289	182	55	-13.2	927.2	5.77007
2019-01-13 10:15:00	164	70	47	-12.9	927	4.1292
2019-01-13 10:30:00	239	111	57	-13.1	926.9	10.1773
2019-01-13 10:45:00	521	315	67	-11.9	927.3	19.8302
2019-01-13 11:00:00	590	366	69	-10.6	927.3	25.0891
2019-01-13 11:15:00	644	388	80	-10.2	927.1	26.5347
2019-01-13 11:30:00	650	389	81	-8.7	927.1	28.6651
2019-01-13 11:45:00	693	429	84	-8	926.8	31.7929
2019-01-13 12:00:00	800	486	105	-7.3	926.4	30.5418
2019-01-13 12:15:00	593	289	130	-7.7	926.4	26.0903
2019-01-13 12:30:00	792	450	152	-7.4	926.2	36.0438
2019-01-13 12:45:00	688	334	216	-7.2	926.1	32.4519
2019-01-13 13:00:00	374	76	187	-6.9	925.9	14.5201
2019-01-13 13:15:00	299	54	139	-7.2	926	18.773
2019-01-13 13:30:00	878	482	173	-6.9	925.9	30.8803
2019-01-13 13:45:00	675	314	199	-6.5	925.7	24.2308
2019-01-13 14:00:00	558	251	155	-6.8	925.5	32.0837
2019-01-13 14:15:00	861	553	136	-5.9	925.4	38.0792
2019-01-13 14:30:00	915	658	114	-5.5	925	36.3898
2019-01-13 14:45:00	870	659	103	-5.1	924.9	36.7107
2019-01-13 15:00:00	841	668	97	-4.4	924.6	35.8315
2019-01-13 15:15:00	786	626	101	-4.3	924.5	32.6653
2019-01-13 15:30:00	763	547	148	-4.4	924.3	21.3944
2019-01-13 15:45:00	342	110	156	-4.5	924.2	11.8135
2019-01-13 16:00:00	232	38	136	-4.6	924.2	7.88633
2019-01-13 16:15:00	160	6	108	-4.5	924.6	7.93393
2019-01-13 16:30:00	219	56	95	-4.4	924.8	9.2828
2019-01-13 16:45:00	129	4	85	-4.4	925	5.87547
2019-01-13 17:00:00	114	1	88	-4.4	925	5.43727
2019-01-13 17:15:00	124	8	87	-4.5	925.2	5.35507
2019-01-13 17:30:00	81	1	61	-4.5	925.2	3.32473
2019-01-13 17:45:00	45	1	36	-4.9	925.3	1.5426
2019-01-13 18:00:00	20	0	19	-5.2	925.5	0.356667
2019-01-13 18:15:00	5	0	5	-5.3	925.8	0
2019-01-13 18:30:00	1	0	1	-5.8	926	0
2019-01-13 18:45:00	0	0	0	-5.8	926.3	0
2019-01-13 19:00:00	0	0	0	-5.8	926.5	0
2019-01-13 19:15:00	0	0	0	-5.9	926.6	0
2019-01-13 19:30:00	0	1	0	-6.2	926.9	0
2019-01-13 19:45:00	0	0	0	-6.1	927	0
2019-01-13 20:00:00	0	0	0	-6.1	927.3	0
2019-01-13 20:15:00	0	0	0	-6.4	927.3	0
2019-01-13 20:30:00	0	1	0	-6.8	927.6	0
2019-01-13 20:45:00	0	0	0	-6.7	927.7	0
2019-01-13 21:00:00	0	0	0	-6.9	928	0
2019-01-13 21:15:00	0	1	0	-7	928.2	0
2019-01-13 21:30:00	0	1	0	-6.8	928.3	0
2019-01-13 21:45:00	0	0	0	-7.1	928.4	0
2019-01-13 22:00:00	0	0	0	-6.8	928.5	0
2019-01-13 22:15:00	0	1	0	-7.4	928.5	0
2019-01-13 22:30:00	0	0	0	-7.4	928.4	0
2019-01-13 22:45:00	0	0	0	-7.5	928.4	0
2019-01-13 23:00:00	0	0	0	-7.3	928.5	0
2019-01-13 23:15:00	0	1	0	-7.7	928.5	0
2019-01-13 23:30:00	0	1	0	-8.7	928.4	0
2019-01-13 23:45:00	0	0	0	-8	928.6	0
2019-01-14 00:00:00	0	0	0	-7.2	928.7	0
2019-01-14 00:15:00	0	1	0	-7.9	928.8	0
2019-01-14 00:30:00	0	0	0	-7.8	928.8	0
2019-01-14 00:45:00	0	0	0	-7.6	928.8	0
2019-01-14 01:00:00	0	1	0	-8	928.9	0
2019-01-14 01:15:00	0	1	0	-8.7	928.9	0
2019-01-14 01:30:00	0	1	0	-9.2	929	0
2019-01-14 01:45:00	0	2	0	-9.4	928.9	0
2019-01-14 02:00:00	0	0	0	-9.4	929	0
2019-01-14 02:15:00	0	0	0	-10.7	929	0
2019-01-14 02:30:00	0	1	0	-10.5	929.2	0
2019-01-14 02:45:00	0	1	0	-10.9	929.1	0
2019-01-14 03:00:00	0	1	0	-10.6	929.4	0
2019-01-14 03:15:00	0	0	0	-10.8	929.5	0
2019-01-14 03:30:00	0	0	0	-10.4	929.6	0
2019-01-14 03:45:00	0	0	0	-10.7	929.7	0
2019-01-14 04:00:00	0	0	0	-10.6	929.7	0
2019-01-14 04:15:00	0	0	0	-10.3	929.7	0
2019-01-14 04:30:00	0	0	0	-10.1	929.9	0
2019-01-14 04:45:00	0	1	0	-10.1	929.7	0
2019-01-14 05:00:00	0	1	0	-10.3	929.6	0
2019-01-14 05:15:00	0	0	0	-10.5	929.5	0
2019-01-14 05:30:00	0	0	0	-10.7	929.5	0
2019-01-14 05:45:00	0	0	0	-10.5	929.5	0
2019-01-14 06:00:00	0	0	0	-10.6	929.5	0
2019-01-14 06:15:00	0	1	0	-11.1	929.6	0
2019-01-14 06:30:00	0	1	0	-11.5	929.8	0
2019-01-14 06:45:00	0	0	0	-11.7	930.1	0
2019-01-14 07:00:00	0	0	0	-11.6	930.2	0
2019-01-14 07:15:00	0	0	0	-10.5	930.5	0
2019-01-14 07:30:00	0	2	0	-11.6	930.6	0
2019-01-14 07:45:00	0	1	0	-11.8	930.8	0
2019-01-14 08:00:00	0	0	0	-12	930.9	0
2019-01-14 08:15:00	0	0	0	-10.7	931.2	0
2019-01-14 08:30:00	0	0	0	-9.6	931	0
2019-01-14 08:45:00	0	1	0	-10.2	931	0
2019-01-14 09:00:00	3	0	1	-10.5	931.2	0
2019-01-14 09:15:00	30	14	9	-9.2	931.3	0.4528
2019-01-14 09:30:00	125	99	22	-8.7	931.3	1.826
2019-01-14 09:45:00	230	175	30	-9.8	931.1	3.7566
2019-01-14 10:00:00	268	178	36	-8.4	931	5.5006
2019-01-14 10:15:00	335	214	42	-6.7	931	11.2058
2019-01-14 10:30:00	468	299	46	-5.6	930.9	17.6761
2019-01-14 10:45:00	558	354	51	-4.3	930.6	22.2735
2019-01-14 11:00:00	622	385	57	-5.5	930.5	25.6113
2019-01-14 11:15:00	657	403	60	-5.5	930.4	28.1123
2019-01-14 11:30:00	702	428	63	-6	930.2	30.2543
2019-01-14 11:45:00	746	491	64	-4.1	930.3	32.5039
2019-01-14 12:00:00	770	502	68	-3.7	930.1	34.0361
2019-01-14 12:15:00	831	536	73	-2.1	929.8	35.9193
2019-01-14 12:30:00	869	549	81	-3.3	929.5	37.1424
2019-01-14 12:45:00	874	525	93	-2.5	929.3	37.4009
2019-01-14 13:00:00	875	511	101	-2.4	929	37.3725
2019-01-14 13:15:00	835	467	107	-2.6	929	36.3785
2019-01-14 13:30:00	908	521	123	-2.3	928.7	36.6506
2019-01-14 13:45:00	765	405	154	-1.5	928.6	35.7956
2019-01-14 14:00:00	829	480	144	-0.8	928.4	35.1839
2019-01-14 14:15:00	808	480	121	-0.4	928.3	35.2292
2019-01-14 14:30:00	832	519	118	0.3	928.1	34.4018
2019-01-14 14:45:00	791	494	120	0.7	928	33.5067
2019-01-14 15:00:00	744	476	120	0	928	32.2731
2019-01-14 15:15:00	696	466	109	0.5	927.9	30.4621
2019-01-14 15:30:00	710	505	115	0	928	31.0591
2019-01-14 15:45:00	649	478	108	0.3	927.7	29.2537
2019-01-14 16:00:00	610	457	101	0.4	928	25.9827
2019-01-14 16:15:00	544	254	94	0.8	928.2	23.0479
2019-01-14 16:30:00	476	232	92	1.2	928	19.3797
2019-01-14 16:45:00	369	176	79	1.6	928.2	14.3039
2019-01-14 17:00:00	283	140	68	0.6	928.2	10.7589
2019-01-14 17:15:00	206	96	58	0.3	928.4	6.8824
2019-01-14 17:30:00	130	54	43	0	928.6	3.66407
2019-01-14 17:45:00	62	12	27	-0.2	928.6	1.94507
2019-01-14 18:00:00	32	0	18	-0.3	928.9	0.867333
2019-01-14 18:15:00	12	0	7	-0.7	928.9	0.071933
2019-01-14 18:30:00	1	2	0	-1.5	929.1	0
2019-01-14 18:45:00	0	1	0	-2.6	929.3	0
2019-01-14 19:00:00	0	0	0	-2.7	929.5	0
2019-01-14 19:15:00	0	1	0	-3	929.7	0
2019-01-14 19:30:00	0	1	0	-2.8	929.9	0
2019-01-14 19:45:00	0	0	0	-2.5	930	0
2019-01-14 20:00:00	0	0	0	-2.4	930.2	0
2019-01-14 20:15:00	0	0	0	-2.6	930.2	0
2019-01-14 20:30:00	0	1	0	-3.2	930.1	0
2019-01-14 20:45:00	0	1	0	-4.8	930.2	0
2019-01-14 21:00:00	0	0	0	-4.6	930.1	0
2019-01-14 21:15:00	0	0	0	-4.1	930.2	0
2019-01-14 21:30:00	0	2	0	-5.2	930.1	0
2019-01-14 21:45:00	0	0	0	-5	930.2	0
2019-01-14 22:00:00	0	0	0	-5.1	930.2	0
2019-01-14 22:15:00	0	0	0	-5.4	930.1	0
2019-01-14 22:30:00	0	0	0	-5.4	930	0
2019-01-14 22:45:00	0	0	0	-5.6	929.9	0
2019-01-14 23:00:00	0	0	0	-5.6	929.8	0
2019-01-14 23:15:00	0	0	0	-5.5	929.7	0
2019-01-14 23:30:00	0	0	0	-5.5	929.6	0
2019-01-14 23:45:00	0	0	0	-5.2	929.3	0
2019-01-15 00:00:00	0	0	0	-5.7	929	0
2019-01-15 00:15:00	0	1	0	-5.8	929	0
2019-01-15 00:30:00	0	1	0	-6.2	929	0
2019-01-15 00:45:00	0	1	0	-6.7	928.8	0
2019-01-15 01:00:00	0	1	0	-6.9	928.7	0
2019-01-15 01:15:00	0	1	0	-7.1	928.5	0
2019-01-15 01:30:00	0	0	0	-6.4	928.4	0
2019-01-15 01:45:00	0	0	0	-6	928.2	0
2019-01-15 02:00:00	0	0	0	-5.9	928	0
2019-01-15 02:15:00	0	0	0	-5.7	927.8	0
2019-01-15 02:30:00	0	0	0	-4.5	927.6	0
2019-01-15 02:45:00	0	0	0	-5.9	927.5	0
2019-01-15 03:00:00	0	0	0	-6.2	927.6	0
2019-01-15 03:15:00	0	1	0	-5.7	927.2	0
2019-01-15 03:30:00	0	0	0	-5.2	927.1	0
2019-01-15 03:45:00	0	0	0	-5.6	927.1	0
2019-01-15 04:00:00	0	0	0	-5.2	927	0
2019-01-15 04:15:00	0	0	0	-5.1	927	0
2019-01-15 04:30:00	0	0	0	-5.5	926.7	0
2019-01-15 04:45:00	0	0	0	-5.1	926.6	0
2019-01-15 05:00:00	0	1	0	-5.6	926.3	0
2019-01-15 05:15:00	0	1	0	-5.7	926	0
2019-01-15 05:30:00	0	0	0	-5.7	926	0
2019-01-15 05:45:00	0	0	0	-5.1	925.7	0
2019-01-15 06:00:00	0	0	0	-5.8	925.5	0
2019-01-15 06:15:00	0	0	0	-4.6	925.2	0
2019-01-15 06:30:00	0	0	0	-4.3	925	0
2019-01-15 06:45:00	0	0	0	-4.8	924.6	0
2019-01-15 07:00:00	0	0	0	-4.8	924.5	0
2019-01-15 07:15:00	0	2	0	-5.5	924.3	0
2019-01-15 07:30:00	0	1	0	-5.4	924.2	0
2019-01-15 07:45:00	0	0	0	-5.9	924.2	0
2019-01-15 08:00:00	0	0	0	-4.5	924.3	0
2019-01-15 08:15:00	0	2	0	-5.8	924.1	0
2019-01-15 08:30:00	0	3	0	-5.1	924	0
2019-01-15 08:45:00	0	0	0	-5.7	924	0
2019-01-15 09:00:00	1	0	1	-4.9	924.1	0
2019-01-15 09:15:00	29	1	18	-5.2	924.2	0.555933
2019-01-15 09:30:00	64	25	27	-6.1	924.2	1.16247
2019-01-15 09:45:00	60	6	38	-4.3	924.2	1.91447
2019-01-15 10:00:00	92	8	60	-4.1	924	3.41353
2019-01-15 10:15:00	124	12	79	-6	924	5.289
2019-01-15 10:30:00	232	61	101	-6.5	924.1	8.12167
2019-01-15 10:45:00	159	19	102	-6.1	924	8.74993
2019-01-15 11:00:00	278	52	120	-5.7	923.8	19.7696
2019-01-15 11:15:00	566	193	160	-5.6	923.8	24.7599
2019-01-15 11:30:00	487	144	173	-4.9	923.8	16.5695
2019-01-15 11:45:00	324	57	163	-4.5	923.7	14.801
2019-01-15 12:00:00	679	266	162	-4.3	923.7	28.4568
2019-01-15 12:15:00	797	373	153	-4.2	923.5	32.3696
2019-01-15 12:30:00	787	341	153	-4.1	923.3	30.6248
2019-01-15 12:45:00	345	41	165	-4.1	923.1	17.6157
2019-01-15 13:00:00	377	40	214	-4	922.8	18.2707
2019-01-15 13:15:00	859	340	240	-3.3	922.7	33.2431
2019-01-15 13:30:00	513	184	153	-3.2	922.4	25.1059
2019-01-15 13:45:00	939	399	269	-3.1	922.2	34.9454
2019-01-15 14:00:00	825	312	272	-3.4	922.3	20.0231
2019-01-15 14:15:00	240	5	190	-3.6	921.9	15.9375
2019-01-15 14:30:00	434	129	169	-3.1	921.8	26.3234
2019-01-15 14:45:00	650	318	142	-3.2	921.9	22.2241
2019-01-15 15:00:00	178	3	110	-3	921.9	12.0903
2019-01-15 15:15:00	125	1	86	-3	922.1	8.98847
2019-01-15 15:30:00	346	107	139	-2.9	922.2	23.089
2019-01-15 15:45:00	495	253	124	-2.2	922	23.283
2019-01-15 16:00:00	452	190	127	-2.2	922	19.7685
2019-01-15 16:15:00	352	69	132	-2.3	921.9	14.2247
2019-01-15 16:30:00	207	13	120	-1.9	922	8.46213
2019-01-15 16:45:00	142	6	92	-2	922	7.8794
2019-01-15 17:00:00	227	46	100	-1.9	922.1	10.6068
2019-01-15 17:15:00	264	111	79	-1.4	922	9.27187
2019-01-15 17:30:00	185	63	75	-1.6	922	5.0478
2019-01-15 17:45:00	67	5	39	-2.2	922	2.532
2019-01-15 18:00:00	37	3	25	-3	922	1.34007
2019-01-15 18:15:00	19	2	12	-3.5	922.1	0.337733
2019-01-15 18:30:00	4	1	3	-4.3	922.3	0
2019-01-15 18:45:00	0	1	0	-4.9	922.5	0
2019-01-15 19:00:00	0	1	0	-5.3	922.8	0
2019-01-15 19:15:00	0	0	0	-5.4	923	0
2019-01-15 19:30:00	0	1	0	-5.5	923	0
2019-01-15 19:45:00	0	0	0	-5.6	923.3	0
2019-01-15 20:00:00	0	1	0	-5.8	923.3	0
2019-01-15 20:15:00	0	0	0	-6.1	923.3	0
2019-01-15 20:30:00	0	0	0	-6.2	923	0
2019-01-15 20:45:00	0	1	0	-6.3	923	0
2019-01-15 21:00:00	0	0	0	-6.8	922.9	0
2019-01-15 21:15:00	0	0	0	-6.1	923	0
2019-01-15 21:30:00	0	0	0	-6	923	0
2019-01-15 21:45:00	0	0	0	-6.5	923	0
2019-01-15 22:00:00	0	0	0	-6.3	922.8	0
2019-01-15 22:15:00	0	0	0	-6	922.8	0
2019-01-15 22:30:00	0	1	0	-6.5	922.5	0
2019-01-15 22:45:00	0	0	0	-6.8	922.3	0
2019-01-15 23:00:00	0	0	0	-7.4	922.3	0
2019-01-15 23:15:00	0	0	0	-7	922.4	0
2019-01-15 23:30:00	0	0	0	-6.7	922.4	0
2019-01-15 23:45:00	0	0	0	-6.6	922.3	0
2019-01-16 00:00:00	0	1	0	-6.8	922	0
2019-01-16 00:15:00	0	0	0	-6.5	921.8	0
2019-01-16 00:30:00	0	2	0	-7.5	921.7	0
2019-01-16 00:45:00	0	1	0	-7.6	921.7	0
2019-01-16 01:00:00	0	2	0	-9.4	921.8	0
2019-01-16 01:15:00	0	1	0	-8.7	921.6	0
2019-01-16 01:30:00	0	2	0	-10.6	921.8	0
2019-01-16 01:45:00	0	0	0	-9.2	921.6	0
2019-01-16 02:00:00	0	1	0	-9.8	921.5	0
2019-01-16 02:15:00	0	0	0	-10.1	921.3	0
2019-01-16 02:30:00	0	0	0	-10.2	921.2	0
2019-01-16 02:45:00	0	0	0	-10.1	920.9	0
2019-01-16 03:00:00	0	0	0	-10.2	920.9	0
2019-01-16 03:15:00	0	0	0	-9.8	921	0
2019-01-16 03:30:00	0	1	0	-10.3	920.9	0
2019-01-16 03:45:00	0	0	0	-10.1	920.8	0
2019-01-16 04:00:00	0	0	0	-9.9	920.8	0
2019-01-16 04:15:00	0	2	0	-10.2	920.6	0
2019-01-16 04:30:00	0	0	0	-10.1	920.6	0
2019-01-16 04:45:00	0	0	0	-9.1	920.5	0
2019-01-16 05:00:00	0	3	0	-10.4	920.6	0
2019-01-16 05:15:00	0	1	0	-12.2	920.5	0
2019-01-16 05:30:00	0	0	0	-11.5	920.9	0
2019-01-16 05:45:00	0	1	0	-12	921	0
2019-01-16 06:00:00	0	0	0	-11.6	920.7	0
2019-01-16 06:15:00	0	0	0	-11.3	920.5	0
2019-01-16 06:30:00	0	0	0	-10.7	920.3	0
2019-01-16 06:45:00	0	0	0	-10.8	919.9	0
2019-01-16 07:00:00	0	0	0	-10.5	920	0
2019-01-16 07:15:00	0	0	0	-10.3	920.1	0
2019-01-16 07:30:00	0	0	0	-10.3	920	0
2019-01-16 07:45:00	0	1	0	-10.4	920	0
2019-01-16 08:00:00	0	0	0	-11.3	920.4	0
2019-01-16 08:15:00	0	1	0	-11.7	920.6	0
2019-01-16 08:30:00	0	0	0	-9.8	920.8	0
2019-01-16 08:45:00	0	0	0	-10.9	921	0
2019-01-16 09:00:00	10	0	5	-10.8	921	0
2019-01-16 09:15:00	20	3	10	-10.5	921	0.4282
2019-01-16 09:30:00	44	14	19	-11.3	921.1	1.00693
2019-01-16 09:45:00	53	4	30	-11.4	920.9	1.6434
2019-01-16 10:00:00	73	5	35	-11.2	921	2.80433
2019-01-16 10:15:00	172	48	54	-10.2	921	9.617
2019-01-16 10:30:00	380	157	75	-9.5	920.8	17.559
2019-01-16 10:45:00	476	196	81	-8.1	920.4	19.5102
2019-01-16 11:00:00	431	169	76	-7.4	920	20.7457
2019-01-16 11:15:00	589	274	71	-6.7	919.8	26.9493
2019-01-16 11:30:00	727	366	72	-6.7	919.6	31.4635
2019-01-16 11:45:00	744	410	74	-5.1	919.6	32.2671
2019-01-16 12:00:00	784	425	79	-4.4	919.5	33.8433
2019-01-16 12:15:00	789	423	79	-3.9	919	35.2353
2019-01-16 12:30:00	879	474	86	-3.2	918.9	37.4661
2019-01-16 12:45:00	876	447	106	-2.8	918.5	37.6876
2019-01-16 13:00:00	611	207	172	-2.4	918	33.0165
2019-01-16 13:15:00	656	202	216	-1.8	917.6	28.1485
2019-01-16 13:30:00	645	215	215	-1.6	917.4	17.1529
2019-01-16 13:45:00	359	105	113	-2.5	917.3	25.0557
2019-01-16 14:00:00	929	504	150	-2.9	917.3	34.2968
2019-01-16 14:15:00	937	562	105	-3.5	917.6	41.8193
2019-01-16 14:30:00	944	588	96	-3.7	917.5	40.5467
2019-01-16 14:45:00	719	402	117	-3.8	917.9	33.5503
2019-01-16 15:00:00	869	584	90	-3.7	917.8	35.9375
2019-01-16 15:15:00	787	554	89	-3.6	918	35.1124
2019-01-16 15:30:00	655	431	99	-3.7	917.8	28.0841
2019-01-16 15:45:00	431	242	99	-3.3	917.7	20.9943
2019-01-16 16:00:00	275	92	81	-3.7	917.8	13.4161
2019-01-16 16:15:00	253	49	91	-3.7	917.7	16.4979
2019-01-16 16:30:00	309	90	81	-3.5	917.7	18.2656
2019-01-16 16:45:00	446	202	78	-3.6	917.5	17.8596
2019-01-16 17:00:00	331	153	66	-3.5	917.7	12.8207
2019-01-16 17:15:00	254	117	57	-3.5	917.8	7.62007
2019-01-16 17:30:00	123	31	46	-3.6	918	4.38547
2019-01-16 17:45:00	90	19	38	-3.7	918.3	2.56593
2019-01-16 18:00:00	35	3	22	-3.8	918.2	0.9232
2019-01-16 18:15:00	19	1	12	-4.4	918.1	0.215333
2019-01-16 18:30:00	2	1	1	-4.3	918.3	0
2019-01-16 18:45:00	0	1	0	-4.7	918.4	0
2019-01-16 19:00:00	0	1	0	-4.7	918.3	0
2019-01-16 19:15:00	0	0	0	-5.2	918.3	0
2019-01-16 19:30:00	0	1	0	-5.5	918.3	0
2019-01-16 19:45:00	0	0	0	-5.5	918.5	0
2019-01-16 20:00:00	0	0	0	-5.4	918.8	0
2019-01-16 20:15:00	0	0	0	-5.3	918.8	0
2019-01-16 20:30:00	0	1	0	-5	919.1	0
2019-01-16 20:45:00	0	1	0	-5.3	919.3	0
2019-01-16 21:00:00	0	0	0	-5.4	919.5	0
2019-01-16 21:15:00	0	1	0	-5.7	919.6	0
2019-01-16 21:30:00	0	2	0	-7	919.5	0
2019-01-16 21:45:00	0	2	0	-7	919.7	0
2019-01-16 22:00:00	0	1	0	-7.4	920.1	0
2019-01-16 22:15:00	0	1	0	-7.5	920.3	0
2019-01-16 22:30:00	0	0	0	-7.7	920.4	0
2019-01-16 22:45:00	0	1	0	-7.8	920.8	0
2019-01-16 23:00:00	0	1	0	-8.3	920.6	0
2019-01-16 23:15:00	0	1	0	-8.7	920.4	0
2019-01-16 23:30:00	0	0	0	-8.8	920.1	0
2019-01-16 23:45:00	0	0	0	-9	920.2	0
2019-01-17 00:00:00	0	0	0	-9	920.1	0
2019-01-17 00:15:00	0	1	0	-9.1	920	0
2019-01-17 00:30:00	0	0	0	-8.9	919.9	0
2019-01-17 00:45:00	0	0	0	-8.6	919.7	0
2019-01-17 01:00:00	0	0	0	-8.5	919.6	0
2019-01-17 01:15:00	0	0	0	-8.7	919.5	0
2019-01-17 01:30:00	0	0	0	-8.2	919.6	0
2019-01-17 01:45:00	0	1	0	-8.7	919.7	0
2019-01-17 02:00:00	0	0	0	-9	919.9	0
2019-01-17 02:15:00	0	1	0	-9.5	919.7	0
2019-01-17 02:30:00	0	0	0	-9.5	920	0
2019-01-17 02:45:00	0	0	0	-9	919.9	0
2019-01-17 03:00:00	0	0	0	-8.5	919.7	0
2019-01-17 03:15:00	0	1	0	-9	919.6	0
2019-01-17 03:30:00	0	0	0	-9.3	919.5	0
2019-01-17 03:45:00	0	1	0	-9.6	919.7	0
2019-01-17 04:00:00	0	1	0	-9.7	920	0
2019-01-17 04:15:00	0	0	0	-9.1	920	0
2019-01-17 04:30:00	0	1	0	-9.7	920.1	0
2019-01-17 04:45:00	0	0	0	-9.4	920	0
2019-01-17 05:00:00	0	1	0	-9.3	919.8	0
2019-01-17 05:15:00	0	1	0	-10.2	919.5	0
2019-01-17 05:30:00	0	0	0	-9.2	919.6	0
2019-01-17 05:45:00	0	0	0	-9.2	919.7	0
2019-01-17 06:00:00	0	0	0	-9.4	919.5	0
2019-01-17 06:15:00	0	0	0	-9.5	919.3	0
2019-01-17 06:30:00	0	0	0	-9.3	919.7	0
2019-01-17 06:45:00	0	0	0	-8.4	919.6	0
2019-01-17 07:00:00	0	0	0	-9.3	919.8	0
2019-01-17 07:15:00	0	0	0	-8.5	920.2	0
2019-01-17 07:30:00	0	0	0	-7.5	920.3	0
2019-01-17 07:45:00	0	0	0	-7.2	920.4	0
2019-01-17 08:00:00	0	1	0	-7.2	920.6	0
2019-01-17 08:15:00	0	2	0	-8.6	921	0
2019-01-17 08:30:00	0	0	0	-9.4	921.2	0
2019-01-17 08:45:00	0	0	0	-9.5	921.6	0
2019-01-17 09:00:00	1	0	0	-9.3	921.9	0
2019-01-17 09:15:00	10	0	6	-9.6	922.1	0.1118
2019-01-17 09:30:00	26	2	14	-10.2	922.3	0.669933
2019-01-17 09:45:00	84	20	30	-10.2	922.3	2.36853
2019-01-17 10:00:00	166	53	47	-9.8	922.6	4.8864
2019-01-17 10:15:00	223	72	62	-10	922.5	7.7586
2019-01-17 10:30:00	192	21	99	-9.5	922.8	8.3926
2019-01-17 10:45:00	177	11	98	-9.2	922.9	6.409
2019-01-17 11:00:00	206	28	83	-8.9	923	9.06693
2019-01-17 11:15:00	413	137	72	-8.1	923.1	10.9203
2019-01-17 11:30:00	628	240	105	-7.4	923.1	27.1564
2019-01-17 11:45:00	687	301	93	-5.5	923	29.1563
2019-01-17 12:00:00	752	306	128	-5.1	923	31.1221
2019-01-17 12:15:00	774	286	180	-4.5	922.8	33.0554
2019-01-17 12:30:00	772	296	168	-3.6	922.5	32.4075
2019-01-17 12:45:00	731	268	155	-3.1	922.5	32.4799
2019-01-17 13:00:00	733	294	132	-4	922.4	30.5029
2019-01-17 13:15:00	645	249	129	-3.8	922.2	30.8466
2019-01-17 13:30:00	884	393	135	-3.3	922.3	36.6237
2019-01-17 13:45:00	804	360	168	-3.1	922.2	33.6834
2019-01-17 14:00:00	924	412	195	-3.1	922.1	30.8331
2019-01-17 14:15:00	980	503	150	-2.5	922	39.6033
2019-01-17 14:30:00	924	502	130	-2.3	921.7	38.8983
2019-01-17 14:45:00	865	486	109	-1.7	921.5	36.0908
2019-01-17 15:00:00	835	508	98	-1.3	921.6	32.9541
2019-01-17 15:15:00	817	529	97	-1.5	921.4	34.4893
2019-01-17 15:30:00	650	443	85	-1.5	921.3	31.7633
2019-01-17 15:45:00	570	371	86	-1.3	921.4	26.9872
2019-01-17 16:00:00	554	346	95	-1.5	921.5	24.6545
2019-01-17 16:15:00	495	169	91	-1.3	921.5	18.6579
2019-01-17 16:30:00	226	47	74	-1.8	921.5	8.51793
2019-01-17 16:45:00	202	30	85	-2.1	921.6	8.36767
2019-01-17 17:00:00	193	41	79	-2.2	921.8	6.773
2019-01-17 17:15:00	128	17	62	-2.4	921.9	4.5678
2019-01-17 17:30:00	154	55	51	-2.7	922.1	4.62247
2019-01-17 17:45:00	75	16	33	-2.6	922.2	2.3218
2019-01-17 18:00:00	46	9	22	-3	922.3	1.145
2019-01-17 18:15:00	15	1	10	-3.5	922.6	0.144533
2019-01-17 18:30:00	2	1	1	-3.8	922.7	0
2019-01-17 18:45:00	0	0	0	-4.1	922.9	0
2019-01-17 19:00:00	0	0	0	-4.1	923.1	0
2019-01-17 19:15:00	0	0	0	-4.2	923.4	0
2019-01-17 19:30:00	0	0	0	-4.3	923.5	0
2019-01-17 19:45:00	0	1	0	-4.6	923.5	0
2019-01-17 20:00:00	0	0	0	-4.5	923.6	0
2019-01-17 20:15:00	0	0	0	-4.3	923.6	0
2019-01-17 20:30:00	0	0	0	-4.2	923.6	0
2019-01-17 20:45:00	0	0	0	-3.9	923.6	0
2019-01-17 21:00:00	0	1	0	-4.5	923.5	0
2019-01-17 21:15:00	0	0	0	-4.6	923.6	0
2019-01-17 21:30:00	0	1	0	-4.7	923.6	0
2019-01-17 21:45:00	0	0	0	-4.8	923.6	0
2019-01-17 22:00:00	0	0	0	-4.7	923.7	0
2019-01-17 22:15:00	0	0	0	-4.5	923.6	0
2019-01-17 22:30:00	0	0	0	-4.3	923.6	0
2019-01-17 22:45:00	0	0	0	-3.5	923.4	0
2019-01-17 23:00:00	0	0	0	-3.5	923.4	0
2019-01-17 23:15:00	0	1	0	-4.4	923.5	0
2019-01-17 23:30:00	0	0	0	-4.4	923.3	0
2019-01-17 23:45:00	0	0	0	-4.2	923.4	0
2019-01-18 00:00:00	0	0	0	-3.8	923.4	0
2019-01-18 00:15:00	0	0	0	-4.1	923.3	0
2019-01-18 00:30:00	0	0	0	-3.9	923.3	0
2019-01-18 00:45:00	0	0	0	-3.9	923.3	0
2019-01-18 01:00:00	0	1	0	-4.1	923.2	0
2019-01-18 01:15:00	0	0	0	-3.9	923.3	0
2019-01-18 01:30:00	0	0	0	-3.8	923.1	0
2019-01-18 01:45:00	0	0	0	-4	923.1	0
2019-01-18 02:00:00	0	0	0	-4.1	923	0
2019-01-18 02:15:00	0	0	0	-3.8	922.9	0
2019-01-18 02:30:00	0	0	0	-4.1	922.8	0
2019-01-18 02:45:00	0	0	0	-4.4	922.7	0
2019-01-18 03:00:00	0	0	0	-4.3	922.7	0
2019-01-18 03:15:00	0	0	0	-4.1	922.8	0
2019-01-18 03:30:00	0	0	0	-4.2	922.6	0
2019-01-18 03:45:00	0	0	0	-3.9	922.6	0
2019-01-18 04:00:00	0	0	0	-4	922.7	0
2019-01-18 04:15:00	0	0	0	-4	922.5	0
2019-01-18 04:30:00	0	0	0	-4	922.5	0
2019-01-18 04:45:00	0	0	0	-4.1	922.4	0
2019-01-18 05:00:00	0	0	0	-4.3	922.3	0
2019-01-18 05:15:00	0	0	0	-4.2	922.2	0
2019-01-18 05:30:00	0	0	0	-4.6	922.2	0
2019-01-18 05:45:00	0	0	0	-4.7	922.1	0
2019-01-18 06:00:00	0	0	0	-4.5	922	0
2019-01-18 06:15:00	0	1	0	-4.8	921.9	0
2019-01-18 06:30:00	0	1	0	-4.9	921.8	0
2019-01-18 06:45:00	0	1	0	-5.2	921.9	0
2019-01-18 07:00:00	0	0	0	-5.6	922	0
2019-01-18 07:15:00	0	0	0	-5.4	921.8	0
2019-01-18 07:30:00	0	0	0	-5.4	921.9	0
2019-01-18 07:45:00	0	0	0	-5.4	922.2	0
2019-01-18 08:00:00	0	0	0	-5.6	922.2	0
2019-01-18 08:15:00	0	1	0	-6.5	922.5	0
2019-01-18 08:30:00	0	0	0	-6.5	922.6	0
2019-01-18 08:45:00	0	0	0	-6.4	922.5	0
2019-01-18 09:00:00	0	0	0	-6.7	922.7	0
2019-01-18 09:15:00	8	0	6	-6.4	922.8	0.06
2019-01-18 09:30:00	22	1	17	-6.8	922.9	0.589467
2019-01-18 09:45:00	43	0	34	-6.7	922.6	1.56993
2019-01-18 10:00:00	61	1	50	-6.8	922.7	2.505
2019-01-18 10:15:00	82	0	66	-7.4	922.6	3.59
2019-01-18 10:30:00	109	0	87	-6.9	922.8	4.62853
2019-01-18 10:45:00	131	1	100	-6.6	922.8	5.61447
2019-01-18 11:00:00	161	3	114	-6.6	922.8	7.01173
2019-01-18 11:15:00	184	4	128	-6	922.6	8.68007
2019-01-18 11:30:00	204	10	132	-5.3	922.6	9.40507
2019-01-18 11:45:00	206	6	144	-4.5	922.4	10.048
2019-01-18 12:00:00	268	19	170	-4.2	922.1	12.5397
2019-01-18 12:15:00	355	44	190	-3.7	922	16.0321
2019-01-18 12:30:00	396	53	205	-3.2	921.8	16.5195
2019-01-18 12:45:00	352	32	206	-2.7	921.4	15.7228
2019-01-18 13:00:00	342	25	204	-2.5	921.2	15.8198
2019-01-18 13:15:00	381	38	210	-2.3	920.9	17.3249
2019-01-18 13:30:00	383	38	213	-1.9	920.7	17.9874
2019-01-18 13:45:00	404	45	224	-1.9	920.5	18.7957
2019-01-18 14:00:00	413	47	229	-1.6	920.5	18.2899
2019-01-18 14:15:00	396	42	231	-0.8	920.1	16.7699
2019-01-18 14:30:00	379	43	221	-1.2	920	16.7549
2019-01-18 14:45:00	403	61	207	-0.9	920	18.2381
2019-01-18 15:00:00	355	48	194	-0.6	919.7	15.7962
2019-01-18 15:15:00	399	69	198	-0.6	919.5	18.6181
2019-01-18 15:30:00	502	154	192	-0.5	919.5	21.8801
2019-01-18 15:45:00	363	89	163	-0.5	919.4	15.1486
2019-01-18 16:00:00	249	19	141	-0.6	919.3	10.9022
2019-01-18 16:15:00	201	13	131	-0.3	919.5	8.80407
2019-01-18 16:30:00	164	4	126	-0.6	919.7	7.12273
2019-01-18 16:45:00	132	2	110	-0.6	919.5	5.8162
2019-01-18 17:00:00	109	2	95	-0.7	919.8	4.68127
2019-01-18 17:15:00	78	3	66	-0.7	919.8	3.2174
2019-01-18 17:30:00	65	1	56	-0.7	919.7	2.6364
2019-01-18 17:45:00	50	1	48	-0.7	919.7	1.85147
2019-01-18 18:00:00	27	1	26	-0.9	919.8	0.784733
2019-01-18 18:15:00	14	0	14	-1	919.9	0.150067
2019-01-18 18:30:00	4	0	4	-1.2	920	0
2019-01-18 18:45:00	0	0	0	-1.3	920.1	0
2019-01-18 19:00:00	0	0	0	-1.5	920.2	0
2019-01-18 19:15:00	0	0	0	-1.8	920.3	0
2019-01-18 19:30:00	0	0	0	-1.8	920.4	0
2019-01-18 19:45:00	0	0	0	-2	920.4	0
2019-01-18 20:00:00	0	0	0	-2.1	920.6	0
2019-01-18 20:15:00	0	0	0	-2	920.7	0
2019-01-18 20:30:00	0	0	0	-2.1	920.7	0
2019-01-18 20:45:00	0	0	0	-2.3	920.7	0
2019-01-18 21:00:00	0	0	0	-2.7	920.8	0
2019-01-18 21:15:00	0	0	0	-2.6	920.9	0
2019-01-18 21:30:00	0	0	0	-2.8	920.9	0
2019-01-18 21:45:00	0	1	0	-3.2	920.9	0
2019-01-18 22:00:00	0	0	0	-3.6	921	0
2019-01-18 22:15:00	0	0	0	-3.6	921.1	0
2019-01-18 22:30:00	0	0	0	-3.7	921.1	0
2019-01-18 22:45:00	0	0	0	-3.7	921	0
2019-01-18 23:00:00	0	0	0	-3.9	921.4	0
2019-01-18 23:15:00	0	0	0	-3.9	921.2	0
2019-01-18 23:30:00	0	0	0	-4	921.4	0
2019-01-18 23:45:00	0	0	0	-4.5	921.5	0
2019-01-19 00:00:00	0	0	0	-4.5	921.5	0
2019-01-19 00:15:00	0	1	0	-4.9	921.6	0
2019-01-19 00:30:00	0	0	0	-4.8	921.6	0
2019-01-19 00:45:00	0	0	0	-4.9	921.7	0
2019-01-19 01:00:00	0	0	0	-4.8	921.6	0
2019-01-19 01:15:00	0	0	0	-5.1	921.8	0
2019-01-19 01:30:00	0	1	0	-5.4	921.8	0
2019-01-19 01:45:00	0	0	0	-5.5	922	0
2019-01-19 02:00:00	0	0	0	-5.8	921.9	0
2019-01-19 02:15:00	0	0	0	-5.7	921.9	0
2019-01-19 02:30:00	0	0	0	-5.7	921.9	0
2019-01-19 02:45:00	0	0	0	-5.5	921.8	0
2019-01-19 03:00:00	0	0	0	-5.5	921.9	0
2019-01-19 03:15:00	0	0	0	-5.3	921.9	0
2019-01-19 03:30:00	0	1	0	-5.4	922	0
2019-01-19 03:45:00	0	0	0	-5.2	921.9	0
2019-01-19 04:00:00	0	0	0	-5.4	922	0
2019-01-19 04:15:00	0	0	0	-5.5	922	0
2019-01-19 04:30:00	0	0	0	-5.6	922	0
2019-01-19 04:45:00	0	1	0	-5.6	922.1	0
2019-01-19 05:00:00	0	0	0	-5.8	921.9	0
2019-01-19 05:15:00	0	0	0	-5.9	921.8	0
2019-01-19 05:30:00	0	0	0	-5.6	922	0
2019-01-19 05:45:00	0	0	0	-5.7	922.1	0
2019-01-19 06:00:00	0	1	0	-6.3	922	0
2019-01-19 06:15:00	0	0	0	-6.4	922	0
2019-01-19 06:30:00	0	0	0	-6.5	922.1	0
2019-01-19 06:45:00	0	0	0	-6.2	922.2	0
2019-01-19 07:00:00	0	0	0	-5.8	922.3	0
2019-01-19 07:15:00	0	0	0	-5.9	922.4	0
2019-01-19 07:30:00	0	0	0	-5.6	922.5	0
2019-01-19 07:45:00	0	0	0	-5.7	922.4	0
2019-01-19 08:00:00	0	0	0	-5.8	922.6	0
2019-01-19 08:15:00	0	1	0	-6	922.7	0
2019-01-19 08:30:00	0	1	0	-6.4	922.8	0
2019-01-19 08:45:00	0	0	0	-6.8	923	0
2019-01-19 09:00:00	2	0	1	-6.7	923.2	0
2019-01-19 09:15:00	20	0	15	-6.9	923.6	0.0932
2019-01-19 09:30:00	40	0	27	-6.8	923.8	0.3634
2019-01-19 09:45:00	65	1	40	-6.7	923.7	0.8442
2019-01-19 10:00:00	110	4	61	-6.5	924	1.71107
2019-01-19 10:15:00	104	1	68	-6.5	924	1.9024
2019-01-19 10:30:00	110	1	72	-6.5	924.1	1.90367
2019-01-19 10:45:00	113	1	81	-6.4	924.1	2.6834
2019-01-19 11:00:00	170	5	102	-6.8	924.3	3.18507
2019-01-19 11:15:00	205	8	118	-7	924.5	3.7602
2019-01-19 11:30:00	252	10	136	-5.2	924.5	4.35573
2019-01-19 11:45:00	309	25	148	-6.4	924.4	4.99693
2019-01-19 12:00:00	279	15	148	-4.2	924.7	5.53753
2019-01-19 12:15:00	343	28	155	-2.6	924.6	8.85787
2019-01-19 12:30:00	505	79	174	-2	924.8	14.8584
2019-01-19 12:45:00	534	88	185	-4.7	924.8	21.1949
2019-01-19 13:00:00	522	75	186	-5.1	924.8	24.1072
2019-01-19 13:15:00	522	75	188	-5.3	925	25.5224
2019-01-19 13:30:00	510	72	187	-4.8	925.1	26.8244
2019-01-19 13:45:00	491	72	187	-4.2	925.2	24.9853
2019-01-19 14:00:00	501	86	178	-4.2	925.1	23.4187
2019-01-19 14:15:00	603	138	173	-3.6	925.1	26.2885
2019-01-19 14:30:00	693	198	165	-3	925.1	29.5827
2019-01-19 14:45:00	695	235	155	-2.9	925.2	30.8791
2019-01-19 15:00:00	688	260	147	-2.6	925.3	31.1323
2019-01-19 15:15:00	759	343	138	-2.1	925.6	31.9393
2019-01-19 15:30:00	716	347	129	-1.9	925.7	31.3347
2019-01-19 15:45:00	679	334	131	-1.3	925.7	28.6706
2019-01-19 16:00:00	631	150	125	-1.3	926	27.1479
2019-01-19 16:15:00	561	136	137	-1.2	926.3	22.7988
2019-01-19 16:30:00	407	69	144	-1.4	926.3	18.8841
2019-01-19 16:45:00	370	62	136	-1.2	926.7	16.7525
2019-01-19 17:00:00	328	70	113	-1.4	926.9	14.2391
2019-01-19 17:15:00	302	86	97	-1.3	927.2	11.7128
2019-01-19 17:30:00	208	53	81	-1.2	927.4	7.74527
2019-01-19 17:45:00	119	16	62	-1.6	927.5	4.33687
2019-01-19 18:00:00	84	17	41	-1.8	928	2.50727
2019-01-19 18:15:00	37	6	20	-2.4	928.2	0.9182
2019-01-19 18:30:00	10	1	6	-2.8	928.6	0.032867
2019-01-19 18:45:00	0	1	0	-3.5	928.7	0
2019-01-19 19:00:00	0	1	0	-3.9	929.1	0
2019-01-19 19:15:00	0	1	0	-4.3	929.4	0
2019-01-19 19:30:00	0	0	0	-4.4	929.6	0
2019-01-19 19:45:00	0	0	0	-4.5	930	0
2019-01-19 20:00:00	0	0	0	-4.4	930.3	0
2019-01-19 20:15:00	0	0	0	-4.5	930.5	0
2019-01-19 20:30:00	0	1	0	-5.2	930.7	0
2019-01-19 20:45:00	0	0	0	-5.5	930.8	0
2019-01-19 21:00:00	0	1	0	-5.5	931	0
2019-01-19 21:15:00	0	0	0	-5.3	931.3	0
2019-01-19 21:30:00	0	0	0	-5.4	931.5	0
2019-01-19 21:45:00	0	0	0	-5.1	931.6	0
2019-01-19 22:00:00	0	0	0	-5.2	931.7	0
2019-01-19 22:15:00	0	0	0	-5.7	931.8	0
2019-01-19 22:30:00	0	0	0	-5.6	931.9	0
2019-01-19 22:45:00	0	0	0	-5.4	932.1	0
2019-01-19 23:00:00	0	0	0	-5.6	932.2	0
2019-01-19 23:15:00	0	0	0	-5.8	932.2	0
2019-01-19 23:30:00	0	0	0	-5.9	932.5	0
2019-01-19 23:45:00	0	0	0	-6	932.5	0
2019-01-20 00:00:00	0	1	0	-6.9	932.5	0
2019-01-20 00:15:00	0	1	0	-7.5	932.8	0
2019-01-20 00:30:00	0	2	0	-7.6	932.8	0
2019-01-20 00:45:00	0	1	0	-8.5	933	0
2019-01-20 01:00:00	0	0	0	-7.7	933.1	0
2019-01-20 01:15:00	0	1	0	-7.5	933	0
2019-01-20 01:30:00	0	2	0	-7.8	933.1	0
2019-01-20 01:45:00	0	0	0	-8.7	933.2	0
2019-01-20 02:00:00	0	0	0	-7.6	933.2	0
2019-01-20 02:15:00	0	1	0	-7.4	933.2	0
2019-01-20 02:30:00	0	0	0	-7.2	933.2	0
2019-01-20 02:45:00	0	0	0	-6	933.1	0
2019-01-20 03:00:00	0	2	0	-6.9	932.9	0
2019-01-20 03:15:00	0	2	0	-8.2	933	0
2019-01-20 03:30:00	0	0	0	-7.3	933.2	0
2019-01-20 03:45:00	0	3	0	-7	933.3	0
2019-01-20 04:00:00	0	2	0	-9	933.5	0
2019-01-20 04:15:00	0	1	0	-9.5	933.5	0
2019-01-20 04:30:00	0	1	0	-9.9	933.7	0
2019-01-20 04:45:00	0	0	0	-9.5	933.5	0
2019-01-20 05:00:00	0	0	0	-10.1	933.6	0
2019-01-20 05:15:00	0	0	0	-10.5	933.6	0
2019-01-20 05:30:00	0	0	0	-10.2	933.5	0
2019-01-20 05:45:00	0	0	0	-9.9	933.5	0
2019-01-20 06:00:00	0	1	0	-9.7	933.5	0
2019-01-20 06:15:00	0	0	0	-9.7	933.4	0
2019-01-20 06:30:00	0	0	0	-8.9	933.5	0
2019-01-20 06:45:00	0	0	0	-8.2	933.5	0
2019-01-20 07:00:00	0	0	0	-7.5	933.6	0
2019-01-20 07:15:00	0	1	0	-9.7	933.5	0
2019-01-20 07:30:00	0	0	0	-8.8	933.7	0
2019-01-20 07:45:00	0	0	0	-8.7	933.8	0
2019-01-20 08:00:00	0	0	0	-7.3	934	0
2019-01-20 08:15:00	0	3	0	-8.5	933.9	0
2019-01-20 08:30:00	0	0	0	-9.3	934.1	0
2019-01-20 08:45:00	0	0	0	-9.3	934.2	0
2019-01-20 09:00:00	3	0	2	-8.3	934.3	0
2019-01-20 09:15:00	17	1	10	-7.8	934.4	0.455267
2019-01-20 09:30:00	111	41	22	-7.8	934.5	1.77167
2019-01-20 09:45:00	100	18	34	-7.9	934.2	3.75293
2019-01-20 10:00:00	149	14	42	-8.1	934.2	7.36647
2019-01-20 10:15:00	399	125	47	-7.6	933.9	14.9433
2019-01-20 10:30:00	494	155	49	-6.6	933.9	20.1089
2019-01-20 10:45:00	575	179	52	-6.6	933.3	24.1309
2019-01-20 11:00:00	632	194	54	-5.3	933.3	26.7122
2019-01-20 11:15:00	681	214	57	-4.7	933.1	29.35
2019-01-20 11:30:00	730	260	60	-4	932.7	31.7611
2019-01-20 11:45:00	777	283	63	-3.8	932.6	33.9967
2019-01-20 12:00:00	822	301	66	-3.1	932.5	35.8587
2019-01-20 12:15:00	865	325	67	-2.9	932.3	37.4243
2019-01-20 12:30:00	909	340	68	-2.4	932.1	38.8455
2019-01-20 12:45:00	945	358	69	-1.9	931.9	40.0517
2019-01-20 13:00:00	977	376	72	-1.8	931.4	41.1436
2019-01-20 13:15:00	1004	392	75	-1.6	931.2	41.8783
2019-01-20 13:30:00	1023	418	82	-1.3	931.2	42.3353
2019-01-20 13:45:00	1033	446	141	-0.6	931	42.4749
2019-01-20 14:00:00	1035	470	109	-0.2	930.8	42.4015
2019-01-20 14:15:00	1021	483	77	-0.1	930.4	42.0597
2019-01-20 14:30:00	994	491	70	0.1	930.2	41.5057
2019-01-20 14:45:00	962	507	68	0.5	929.9	40.5847
2019-01-20 15:00:00	924	517	66	0.7	929.5	39.6363
2019-01-20 15:15:00	881	525	64	0.5	929.4	38.538
2019-01-20 15:30:00	837	536	62	0.7	929.1	37.0925
2019-01-20 15:45:00	790	538	59	0.9	929	35.3046
2019-01-20 16:00:00	745	516	56	1.1	928.8	33.3187
2019-01-20 16:15:00	706	255	53	1	928.7	31.1534
2019-01-20 16:30:00	675	270	51	1	928.6	28.7937
2019-01-20 16:45:00	621	278	45	1.2	928.5	25.9817
2019-01-20 17:00:00	564	321	41	1.1	928.3	22.5577
2019-01-20 17:15:00	493	309	38	0.8	928.3	18.354
2019-01-20 17:30:00	415	304	33	0.8	928.2	12.2691
2019-01-20 17:45:00	316	266	28	0.4	928.2	6.14413
2019-01-20 18:00:00	209	194	22	0.2	928.1	3.06213
2019-01-20 18:15:00	111	121	14	0	928.1	0.9772
2019-01-20 18:30:00	22	17	5	-1.1	928	0.0594
2019-01-20 18:45:00	0	1	0	-1.5	928.2	0
2019-01-20 19:00:00	0	0	0	-1.8	928.3	0
2019-01-20 19:15:00	0	0	0	-1.9	928.3	0
2019-01-20 19:30:00	0	0	0	-2.5	928.4	0
2019-01-20 19:45:00	0	0	0	-2.2	928.4	0
2019-01-20 20:00:00	0	1	0	-2.4	928.5	0
2019-01-20 20:15:00	0	1	0	-2.8	928.5	0
2019-01-20 20:30:00	0	0	0	-2.9	928.3	0
2019-01-20 20:45:00	0	1	0	-3	928.4	0
2019-01-20 21:00:00	0	1	0	-3	928.5	0
2019-01-20 21:15:00	0	1	0	-3.4	928.4	0
2019-01-20 21:30:00	0	1	0	-3.6	928.4	0
2019-01-20 21:45:00	0	0	0	-4.2	928.2	0
2019-01-20 22:00:00	0	0	0	-4.4	928.3	0
2019-01-20 22:15:00	0	0	0	-4.1	928	0
2019-01-20 22:30:00	0	1	0	-4.2	928	0
2019-01-20 22:45:00	0	0	0	-4.7	927.8	0
2019-01-20 23:00:00	0	1	0	-5.5	927.5	0
2019-01-20 23:15:00	0	1	0	-5.2	927.5	0
2019-01-20 23:30:00	0	1	0	-5.5	927.4	0
2019-01-20 23:45:00	0	1	0	-5.7	927.4	0
2019-01-21 00:00:00	0	1	0	-5.3	927.4	0
2019-01-21 00:15:00	0	1	0	-6.8	927.3	0
2019-01-21 00:30:00	0	0	0	-7	927.2	0
2019-01-21 00:45:00	0	1	0	-7.5	927.1	0
2019-01-21 01:00:00	0	0	0	-7.9	927.2	0
2019-01-21 01:15:00	0	0	0	-8.3	927.2	0
2019-01-21 01:30:00	0	0	0	-7.1	927.1	0
2019-01-21 01:45:00	0	2	0	-9.1	927	0
2019-01-21 02:00:00	0	0	0	-8.2	926.7	0
2019-01-21 02:15:00	0	0	0	-7	926.5	0
2019-01-21 02:30:00	0	1	0	-7.3	926.4	0
2019-01-21 02:45:00	0	2	0	-9.5	926.2	0
2019-01-21 03:00:00	0	0	0	-8.9	926.2	0
2019-01-21 03:15:00	0	0	0	-7	925.9	0
2019-01-21 03:30:00	0	0	0	-6.8	925.8	0
2019-01-21 03:45:00	0	0	0	-6.5	925.7	0
2019-01-21 04:00:00	0	3	0	-7.6	925.5	0
2019-01-21 04:15:00	0	1	0	-7.9	925.6	0
2019-01-21 04:30:00	0	0	0	-7.1	925.5	0
2019-01-21 04:45:00	0	1	0	-7.4	925.5	0
2019-01-21 05:00:00	0	2	0	-10.1	925.5	0
2019-01-21 05:15:00	0	0	0	-10.4	925.5	0
2019-01-21 05:30:00	0	1	0	-10.8	925.3	0
2019-01-21 05:45:00	0	0	0	-10.8	925.3	0
2019-01-21 06:00:00	0	0	0	-10.8	925.3	0
2019-01-21 06:15:00	0	0	0	-10.5	925.4	0
2019-01-21 06:30:00	0	0	0	-10.2	925.2	0
2019-01-21 06:45:00	0	0	0	-9.9	925.3	0
2019-01-21 07:00:00	0	0	0	-10.2	925.2	0
2019-01-21 07:15:00	0	1	0	-10.7	925.2	0
2019-01-21 07:30:00	0	1	0	-10.9	925.1	0
2019-01-21 07:45:00	0	1	0	-11.5	925	0
2019-01-21 08:00:00	0	0	0	-10.7	925.1	0
2019-01-21 08:15:00	0	0	0	-10.2	925	0
2019-01-21 08:30:00	0	2	0	-11.3	925.1	0
2019-01-21 08:45:00	0	0	0	-11.7	925.1	0
2019-01-21 09:00:00	4	0	2	-11.6	925	0.010267
2019-01-21 09:15:00	57	19	10	-11.9	925.4	0.517533
2019-01-21 09:30:00	163	59	20	-10.8	925.2	2.42507
2019-01-21 09:45:00	274	92	28	-11.6	925.1	5.18733
2019-01-21 10:00:00	82	28	33	-11.3	925	9.8966
2019-01-21 10:15:00	476	136	39	-10.6	924.9	17.6888
2019-01-21 10:30:00	564	156	41	-9.8	924.6	22.8307
2019-01-21 10:45:00	629	171	45	-8.9	924.2	26.4409
2019-01-21 11:00:00	685	183	48	-7.9	923.9	29.2546
2019-01-21 11:15:00	729	196	52	-7.2	923.8	31.4503
2019-01-21 11:30:00	770	215	53	-6.4	923.7	33.6913
2019-01-21 11:45:00	809	273	54	-5.1	923.4	35.6539
2019-01-21 12:00:00	846	286	57	-4.2	923.3	37.0062
2019-01-21 12:15:00	889	307	55	-2.3	923.2	38.6294
2019-01-21 12:30:00	935	324	55	-2.8	923	39.9182
2019-01-21 12:45:00	966	336	57	-2.1	922.8	41.0841
2019-01-21 13:00:00	1000	353	62	-2.7	922.5	41.9067
2019-01-21 13:15:00	1031	372	62	-2.3	922.3	42.6518
2019-01-21 13:30:00	1052	401	68	-1.7	922	43.1325
2019-01-21 13:45:00	1068	431	138	-1.9	921.9	43.2853
2019-01-21 14:00:00	1066	450	108	-1.6	921.6	43.2799
2019-01-21 14:15:00	1051	461	70	-1.2	921.6	43.1027
2019-01-21 14:30:00	1031	476	63	-1.3	921.4	42.5826
2019-01-21 14:45:00	996	488	60	-0.7	921.2	41.9285
2019-01-21 15:00:00	962	503	59	-0.7	921.1	40.8906
2019-01-21 15:15:00	913	507	58	-0.7	920.9	39.5576
2019-01-21 15:30:00	865	513	58	-0.7	920.6	37.7761
2019-01-21 15:45:00	808	507	58	-0.6	920.5	35.8316
2019-01-21 16:00:00	759	502	56	-0.4	920.5	33.6955
2019-01-21 16:15:00	714	230	53	0	920.4	31.2379
2019-01-21 16:30:00	667	236	51	0	920	28.4882
2019-01-21 16:45:00	612	240	49	-0.2	920.1	25.4597
2019-01-21 17:00:00	558	276	46	-0.1	920	22.3054
2019-01-21 17:15:00	500	276	42	-0.4	920.3	18.6996
2019-01-21 17:30:00	418	267	36	-0.4	920.1	12.9927
2019-01-21 17:45:00	322	239	30	-0.7	920.2	6.6574
2019-01-21 18:00:00	216	175	24	-1.3	920.2	3.3128
2019-01-21 18:15:00	110	95	16	-1.6	920.3	1.13987
2019-01-21 18:30:00	21	9	6	-2.1	920.5	0.1254
2019-01-21 18:45:00	0	1	0	-2.6	920.5	0
2019-01-21 19:00:00	0	1	0	-3.3	920.9	0
2019-01-21 19:15:00	0	0	0	-3.6	921	0
2019-01-21 19:30:00	0	0	0	-3.8	921.1	0
[truncated: 68,177 more rows]
