# Supplementary material
Source: PeerJ journal article supplement (doi:10.7717/peerj-cs.3610)
Supplement: Solar_station_site_2_Nominal_capacity130MW.xlsx [file Solar_station_site_2_Nominal_capacity130MW.xlsx]

## Sheet: sheet1
Time(year-month-day h:m:s)	Total solar irradiance (W/m2)	Direct normal irradiance (W/m2)	Global horizontal irradiance (W/m2)	Air temperature (°C)	Atmosphere (hpa)	Power (MW)
2019-01-01 00:00:00	0	0	0	-9.62	872.81	0.269033
2019-01-01 00:15:00	0	0	0	-9.96	872.78	0.2681
2019-01-01 00:30:00	0	0	0	-10.16	872.76	0.266933
2019-01-01 00:45:00	0	0	0	-10.37	872.77	0.269267
2019-01-01 01:00:00	0	0	0	-10.49	872.8	0.269967
2019-01-01 01:15:00	0	0	0	-10.38	872.87	0.272067
2019-01-01 01:30:00	0	0	0	-10.37	855.57	0.267633
2019-01-01 01:45:00	0	0	0	-10.74	873.04	0.2702
2019-01-01 02:00:00	0	0	0	-10.54	873.01	0.269033
2019-01-01 02:15:00	0	0	0	-10.6	872.99	0.2772
2019-01-01 02:30:00	0	0	0	-10.94	872.84	0.2758
2019-01-01 02:45:00	0	0	0	-11.11	872.85	0.276733
2019-01-01 03:00:00	0	0	0	-11.59	872.77	0.272767
2019-01-01 03:15:00	0	0	0	-11.38	872.82	0.2716
2019-01-01 03:30:00	0	0	0	-11.53	872.7	0.273
2019-01-01 03:45:00	0	0	0	-12.07	872.75	0.273233
2019-01-01 04:00:00	0	0	0	-11.83	872.65	0.277433
2019-01-01 04:15:00	0	0	0	-12.01	872.59	0.2779
2019-01-01 04:30:00	0	0	0	-12	872.56	0.279067
2019-01-01 04:45:00	0	0	0	-11.55	872.54	0.276033
2019-01-01 05:00:00	0	0	0	-11.49	872.52	0.277667
2019-01-01 05:15:00	0	0	0	-11.42	872.46	0.2779
2019-01-01 05:30:00	0	0	0	-11.48	872.49	0.278133
2019-01-01 05:45:00	0	0	0	-11.55	872.15	0.279767
2019-01-01 06:00:00	0	0	0	-12.12	872.02	0.2828
2019-01-01 06:15:00	0	0	0	-11.6	871.78	0.279067
2019-01-01 06:30:00	0	0	0	-11.97	871.61	0.278367
2019-01-01 06:45:00	0	0	0	-11.87	871.51	0.274867
2019-01-01 07:00:00	0	0	0	-12.22	871.19	0.272533
2019-01-01 07:15:00	0	0	0	-12.12	871.06	0.2772
2019-01-01 07:30:00	0	0	0	-12.55	870.85	0.28
2019-01-01 07:45:00	0	0	0	-12.53	870.54	0.276733
2019-01-01 08:00:00	0	0	0	-12.98	870.61	0.267167
2019-01-01 08:15:00	0	0	0	-13.42	870.6	0.2772
2019-01-01 08:30:00	0	0	0	-13.5	870.86	0.273467
2019-01-01 08:45:00	0	0	0	-13.03	871.11	0.2737
2019-01-01 09:00:00	0	0	0	-12.8	871.27	0.271367
2019-01-01 09:15:00	0	0	0	-13.05	871.46	0.270667
2019-01-01 09:30:00	0	0	0	-13.05	871.65	0.278833
2019-01-01 09:45:00	0	0	0	-13.04	871.85	0.2744
2019-01-01 10:00:00	0	0	0	-12.91	871.94	0.6384
2019-01-01 10:15:00	10.96	7.91	6.57	-12.83	872.08	3.22443
2019-01-01 10:30:00	33.32	24.04	20.5	-12.79	872.18	7.28047
2019-01-01 10:45:00	64.77	46.73	41.97	-11.99	872.25	11.0866
2019-01-01 11:00:00	86.91	62.7	58.2	-11.14	872.24	12.6226
2019-01-01 11:15:00	106.44	76.8	72.71	-10.14	872.09	17.9461
2019-01-01 11:30:00	142.05	102.49	97.41	-9.26	871.72	31.2195
2019-01-01 11:45:00	206.83	149.23	141.49	-8.38	871.46	43.7134
2019-01-01 12:00:00	243.83	175.92	167.07	-7.12	871.08	51.8121
2019-01-01 12:15:00	210.9	152.16	190.26	-6.09	870.61	59.6034
2019-01-01 12:30:00	328.75	237.2	176.47	-5.14	870.09	63.0714
2019-01-01 12:45:00	291.77	210.51	198.99	-4.79	869.69	65.0081
2019-01-01 13:00:00	398.64	287.62	281.22	-4.38	869.3	77.7663
2019-01-01 13:15:00	409.67	295.58	292.04	-3.99	869.02	80.2165
2019-01-01 13:30:00	414.97	299.4	299.4	-3.79	868.67	82.7932
2019-01-01 13:45:00	427.77	308.64	309.09	-3.59	868.35	85.3391
2019-01-01 14:00:00	442.39	319.18	319.39	-3.25	867.92	87.0289
2019-01-01 14:15:00	453.83	327.44	326.93	-3.05	867.81	87.7366
2019-01-01 14:30:00	459.5	331.53	331.36	-3.1	867.57	87.8831
2019-01-01 14:45:00	457.36	329.99	330.66	-2.64	867.43	85.9574
2019-01-01 15:00:00	451.74	325.93	326.2	-2.27	867.28	84.2833
2019-01-01 15:15:00	445.45	321.39	320.58	-1.8	866.9	81.6132
2019-01-01 15:30:00	434.28	313.33	312.2	-2.11	866.8	80.2769
2019-01-01 15:45:00	425.62	307.08	306.21	-1.26	866.44	77.6067
2019-01-01 16:00:00	402.05	290.08	288.85	-1.09	866.1	74.0371
2019-01-01 16:15:00	388.11	280.02	276.76	-1.23	865.96	70.2525
2019-01-01 16:30:00	361.03	260.49	255.49	-0.82	865.75	64.8291
2019-01-01 16:45:00	336.36	242.69	235.54	-1.31	865.47	59.5525
2019-01-01 17:00:00	313.27	226.03	217.19	-1.04	865.22	56.3871
2019-01-01 17:15:00	274.91	198.35	187.84	-1.13	865.04	48.4909
2019-01-01 17:30:00	248.35	179.18	167.11	-1.17	864.79	43.0577
2019-01-01 17:45:00	217.5	156.93	145.26	-1.12	864.5	32.9875
2019-01-01 18:00:00	181.14	130.69	120.3	-1.35	864.36	18.6576
2019-01-01 18:15:00	90.85	65.55	58.48	-1.92	864.41	11.6424
2019-01-01 18:30:00	100.09	72.22	63.76	-2.12	864.57	9.61847
2019-01-01 18:45:00	51.29	37.01	30.98	-2.52	864.62	4.67623
2019-01-01 19:00:00	26.5	19.12	15.05	-3.04	864.81	2.3086
2019-01-01 19:15:00	10.95	7.9	5.84	-3.57	865.02	0.589167
2019-01-01 19:30:00	0	0	0	-4.22	865.15	0.285367
2019-01-01 19:45:00	0	0	0	-4.77	865.41	0.2681
2019-01-01 20:00:00	0	0	0	-5.13	865.5	0.266467
2019-01-01 20:15:00	0	0	0	-5.61	865.73	0.269733
2019-01-01 20:30:00	0	0	0	-6.25	865.83	0.2758
2019-01-01 20:45:00	0	0	0	-6.51	865.92	0.276033
2019-01-01 21:00:00	0	0	0	-6.69	865.93	0.2751
2019-01-01 21:15:00	0	0	0	-6.96	866.01	0.262733
2019-01-01 21:30:00	0	0	0	-6.94	866	0.2639
2019-01-01 21:45:00	0	0	0	-6.88	866.2	0.257367
2019-01-01 22:00:00	0	0	0	-6.98	866.25	0.262267
2019-01-01 22:15:00	0	0	0	-7.11	866.24	0.257367
2019-01-01 22:30:00	0	0	0	-6.64	866.3	0.262267
2019-01-01 22:45:00	0	0	0	-6.67	866.25	0.262733
2019-01-01 23:00:00	0	0	0	-7.8	866.25	0.264133
2019-01-01 23:15:00	0	0	0	-8.36	866.33	0.264833
2019-01-01 23:30:00	0	0	0	-8.33	866.46	0.265067
2019-01-01 23:45:00	0	0	0	-7.84	866.53	0.267633
2019-01-02 00:00:00	0	0	0	-8.56	866.46	0.266
2019-01-02 00:15:00	0	0	0	-9.2	866.5	0.266933
2019-01-02 00:30:00	0	0	0	-8.93	866.46	0.266467
2019-01-02 00:45:00	0	0	0	-9.12	866.44	0.2681
2019-01-02 01:00:00	0	0	0	-9.33	866.49	0.271133
2019-01-02 01:15:00	0	0	0	-9.44	866.53	0.2688
2019-01-02 01:30:00	0	0	0	-9.49	866.55	0.269967
2019-01-02 01:45:00	0	0	0	-9.94	866.5	0.271133
2019-01-02 02:00:00	0	0	0	-9.76	866.51	0.275567
2019-01-02 02:15:00	0	0	0	-9.29	866.49	0.267633
2019-01-02 02:30:00	0	0	0	-9.62	866.45	0.269033
2019-01-02 02:45:00	0	0	0	-8.9	866.51	0.273
2019-01-02 03:00:00	0	0	0	-9.28	866.45	0.276033
2019-01-02 03:15:00	0	0	0	-9.6	866.52	0.274633
2019-01-02 03:30:00	0	0	0	-8.77	866.54	0.2786
2019-01-02 03:45:00	0	0	0	-8.62	866.55	0.269733
2019-01-02 04:00:00	0	0	0	-8.81	866.5	0.269033
2019-01-02 04:15:00	0	0	0	-9.61	866.54	0.2793
2019-01-02 04:30:00	0	0	0	-9.79	866.57	0.279767
2019-01-02 04:45:00	0	0	0	-9.99	866.61	0.277433
2019-01-02 05:00:00	0	0	0	-10.04	866.69	0.273
2019-01-02 05:15:00	0	0	0	-10.06	866.7	0.2758
2019-01-02 05:30:00	0	0	0	-9.89	866.68	0.2765
2019-01-02 05:45:00	0	0	0	-9.99	866.64	0.2744
2019-01-02 06:00:00	0	0	0	-9.84	866.47	0.272533
2019-01-02 06:15:00	0	0	0	-9.84	866.19	0.2744
2019-01-02 06:30:00	0	0	0	-9.73	866.03	0.2765
2019-01-02 06:45:00	0	0	0	-9.55	865.93	0.2744
2019-01-02 07:00:00	0	0	0	-9.5	865.79	0.273467
2019-01-02 07:15:00	0	0	0	-9.64	865.65	0.2709
2019-01-02 07:30:00	0	0	0	-9.9	865.63	0.2709
2019-01-02 07:45:00	0	0	0	-10.3	865.72	0.266933
2019-01-02 08:00:00	0	0	0	-10.32	865.75	0.269733
2019-01-02 08:15:00	0	0	0	-10.5	865.92	0.271133
2019-01-02 08:30:00	0	0	0	-10.79	866.02	0.2709
2019-01-02 08:45:00	0	0	0	-10.82	866.17	0.2653
2019-01-02 09:00:00	0	0	0	-11.04	866.3	0.268333
2019-01-02 09:15:00	0	0	0	-11.11	866.54	0.267633
2019-01-02 09:30:00	0	0	0	-10.85	866.55	0.277433
2019-01-02 09:45:00	0	0	0	-10.93	866.69	0.2933
2019-01-02 10:00:00	0	0	0	-10.91	866.89	0.4333
2019-01-02 10:15:00	9.19	6.63	5.1	-10.75	867.02	2.5396
2019-01-02 10:30:00	34.56	24.94	20.29	-10.18	867.11	6.64323
2019-01-02 10:45:00	68.91	49.72	39.97	-9.57	867.24	14.2844
2019-01-02 11:00:00	128.33	92.59	77.4	-9.28	867.21	21.6974
2019-01-02 11:15:00	194.88	140.61	121.99	-8.99	867.12	28.1545
2019-01-02 11:30:00	207.95	150.03	133.01	-8.47	867.05	35.6946
2019-01-02 11:45:00	241.29	174.09	156.4	-7.67	866.83	42.921
2019-01-02 12:00:00	279.36	201.56	181.88	-6.88	866.73	53.0707
2019-01-02 12:15:00	292.45	211	218.63	-6.15	866.57	63.28
2019-01-02 12:30:00	357.09	257.64	190.85	-5.72	866.42	60.6972
2019-01-02 12:45:00	366.79	264.64	240.98	-5.15	866.28	60.637
2019-01-02 13:00:00	333.01	240.27	216.96	-5.35	866.15	46.9726
2019-01-02 13:15:00	222.37	160.44	139.54	-5.09	866.11	42.9431
2019-01-02 13:30:00	261.34	188.56	160.2	-4.64	866.13	48.4904
2019-01-02 13:45:00	384.49	277.41	257.49	-4.41	866.03	63.6417
2019-01-02 14:00:00	311.2	224.53	211.51	-4.15	865.83	52.601
2019-01-02 14:15:00	309.13	223.03	207.93	-4.5	865.68	57.9836
2019-01-02 14:30:00	361.77	261.02	243.46	-4.27	865.57	69.6323
2019-01-02 14:45:00	397.45	286.76	269.24	-3.52	865.43	66.6736
2019-01-02 15:00:00	364.29	262.83	250.07	-3.44	865.26	66.8596
2019-01-02 15:15:00	387.1	279.29	269.89	-3.05	865.15	73.7539
2019-01-02 15:30:00	417.62	301.31	294.52	-3.28	864.97	77.9683
2019-01-02 15:45:00	411.75	297.08	289.98	-2.79	864.84	75.8998
2019-01-02 16:00:00	400.99	289.32	283.12	-2.59	864.73	72.8292
2019-01-02 16:15:00	382.75	276.16	269.36	-2.41	864.57	67.5458
2019-01-02 16:30:00	336.89	243.06	235.12	-3.04	864.54	57.089
2019-01-02 16:45:00	329.72	237.89	228.1	-2.72	864.72	51.2776
2019-01-02 17:00:00	294.38	212.4	195.79	-2.72	864.77	49.3519
2019-01-02 17:15:00	215.3	155.34	136.74	-2.23	864.8	28.5621
2019-01-02 17:30:00	126.58	91.33	75.82	-2.79	864.95	14.3292
2019-01-02 17:45:00	122.27	88.22	76.53	-2.91	865.23	14.8057
2019-01-02 18:00:00	74	53.39	42.75	-2.81	865.47	9.583
2019-01-02 18:15:00	56.7	40.91	31.07	-2.8	865.61	5.87043
2019-01-02 18:30:00	39.18	28.27	22.17	-2.95	865.84	4.48117
2019-01-02 18:45:00	29.21	21.08	16.18	-3.16	866.01	2.7223
2019-01-02 19:00:00	13.75	9.92	7.67	-3.28	866.15	0.9401
2019-01-02 19:15:00	2.83	2.04	1.4	-3.35	866.27	0.1701
2019-01-02 19:30:00	0	0	0	-3.6	866.39	0.280467
2019-01-02 19:45:00	0	0	0	-3.88	866.5	0.266467
2019-01-02 20:00:00	0	0	0	-4.06	866.67	0.2695
2019-01-02 20:15:00	0	0	0	-4.12	866.84	0.265067
2019-01-02 20:30:00	0	0	0	-4.21	866.93	0.268333
2019-01-02 20:45:00	0	0	0	-4.58	867.02	0.268567
2019-01-02 21:00:00	0	0	0	-4.6	867.04	0.271833
2019-01-02 21:15:00	0	0	0	-5	867.06	0.260167
2019-01-02 21:30:00	0	0	0	-5.05	867.17	0.2583
2019-01-02 21:45:00	0	0	0	-5.12	867.23	0.255967
2019-01-02 22:00:00	0	0	0	-5.42	867.28	0.257133
2019-01-02 22:15:00	0	0	0	-5.47	867.4	0.2555
2019-01-02 22:30:00	0	0	0	-5.28	867.34	0.256667
2019-01-02 22:45:00	0	0	0	-5.3	867.32	0.2604
2019-01-02 23:00:00	0	0	0	-5.32	867.26	0.2625
2019-01-02 23:15:00	0	0	0	-5.33	867.33	0.259
2019-01-02 23:30:00	0	0	0	-5.57	867.45	0.266467
2019-01-02 23:45:00	0	0	0	-5.67	867.52	0.261333
2019-01-03 00:00:00	0	0	0	-5.59	867.6	0.261333
2019-01-03 00:15:00	0	0	0	-5.49	867.72	0.262967
2019-01-03 00:30:00	0	0	0	-5.66	867.66	0.262033
2019-01-03 00:45:00	0	0	0	-5.7	867.59	0.2625
2019-01-03 01:00:00	0	0	0	-5.73	867.7	0.262967
2019-01-03 01:15:00	0	0	0	-5.72	867.69	0.263667
2019-01-03 01:30:00	0	0	0	-5.78	867.74	0.263433
2019-01-03 01:45:00	0	0	0	-5.81	867.94	0.2625
2019-01-03 02:00:00	0	0	0	-5.78	868.01	0.262033
2019-01-03 02:15:00	0	0	0	-5.69	868.09	0.263667
2019-01-03 02:30:00	0	0	0	-5.66	868.19	0.2611
2019-01-03 02:45:00	0	0	0	-5.71	868.27	0.265533
2019-01-03 03:00:00	0	0	0	-5.79	868.37	0.264133
2019-01-03 03:15:00	0	0	0	-5.98	868.46	0.262733
2019-01-03 03:30:00	0	0	0	-6.11	868.58	0.262267
2019-01-03 03:45:00	0	0	0	-6.14	868.63	0.264367
2019-01-03 04:00:00	0	0	0	-6.13	868.92	0.266933
2019-01-03 04:15:00	0	0	0	-6.37	869.03	0.261567
2019-01-03 04:30:00	0	0	0	-6.38	869.11	0.265067
2019-01-03 04:45:00	0	0	0	-6.83	869.23	0.265533
2019-01-03 05:00:00	0	0	0	-6.84	869.27	0.265067
2019-01-03 05:15:00	0	0	0	-6.74	869.2	0.2653
2019-01-03 05:30:00	0	0	0	-6.68	869.12	0.266233
2019-01-03 05:45:00	0	0	0	-6.91	869.15	0.267633
2019-01-03 06:00:00	0	0	0	-7.01	869.05	0.266933
2019-01-03 06:15:00	0	0	0	-6.92	869.1	0.265067
2019-01-03 06:30:00	0	0	0	-6.76	868.96	0.264833
2019-01-03 06:45:00	0	0	0	-6.82	868.84	0.262733
2019-01-03 07:00:00	0	0	0	-7.23	868.9	0.264833
2019-01-03 07:15:00	0	0	0	-7.05	868.77	0.2653
2019-01-03 07:30:00	0	0	0	-7.11	868.84	0.262967
2019-01-03 07:45:00	0	0	0	-7.47	868.91	0.2604
2019-01-03 08:00:00	0	0	0	-8.22	869.03	0.263667
2019-01-03 08:15:00	0	0	0	-8.8	869.21	0.2618
2019-01-03 08:30:00	0	0	0	-8.92	869.37	0.266
2019-01-03 08:45:00	0	0	0	-8.99	869.5	0.265767
2019-01-03 09:00:00	0	0	0	-9.37	869.67	0.264833
2019-01-03 09:15:00	0	0	0	-8.85	869.82	0.266233
2019-01-03 09:30:00	0	0	0	-9.18	869.92	0.269967
2019-01-03 09:45:00	0	0	0	-9.28	870.19	0.287467
2019-01-03 10:00:00	0	0	0	-9.54	870.33	0.239633
2019-01-03 10:15:00	4.71	3.4	2.74	-9.51	870.54	1.477
2019-01-03 10:30:00	13.05	9.42	7.98	-9.29	870.65	3.10987
2019-01-03 10:45:00	37.03	26.71	22.52	-8.99	870.89	6.0844
2019-01-03 11:00:00	21.47	15.49	13.15	-8.22	870.89	5.15387
2019-01-03 11:15:00	38.75	27.96	24.17	-8.09	871.02	13.4748
2019-01-03 11:30:00	164.87	118.95	114.6	-7.51	871.06	32.7159
2019-01-03 11:45:00	196.56	141.82	135.52	-5.47	871.01	44.4789
2019-01-03 12:00:00	238.11	171.8	165.22	-3.26	870.84	52.4664
2019-01-03 12:15:00	209.15	150.9	187.61	-4.71	870.8	58.9027
2019-01-03 12:30:00	302.34	218.14	136.9	-4.43	870.65	65.0911
2019-01-03 12:45:00	334.17	241.11	237.56	-3.7	870.58	70.3178
2019-01-03 13:00:00	360.87	260.37	259.49	-3.18	870.42	74.5061
2019-01-03 13:15:00	384.06	277.1	277.82	-2.52	870.23	78.0577
2019-01-03 13:30:00	401.34	289.57	290.96	-2.09	870.12	80.7877
2019-01-03 13:45:00	417.53	301.25	302.36	-1.19	869.96	83.3075
2019-01-03 14:00:00	430.69	310.75	311.27	-0.67	869.79	84.7187
2019-01-03 14:15:00	438.93	316.69	317.6	-0.7	869.55	85.3939
2019-01-03 14:30:00	445.77	321.63	321.46	-0.52	869.26	85.4285
2019-01-03 14:45:00	441.65	318.65	320.11	-0.07	869.03	84.6081
2019-01-03 15:00:00	448.73	323.76	324.41	0	868.81	83.6351
2019-01-03 15:15:00	440.7	317.97	318.45	0.67	868.53	82.7038
2019-01-03 15:30:00	435.34	314.1	314.64	0.79	868.3	80.6706
2019-01-03 15:45:00	422.8	305.05	305.41	1.12	868.1	78.3463
2019-01-03 16:00:00	406.13	293.02	292.74	1.56	867.86	75.2078
2019-01-03 16:15:00	388.77	280.5	278.61	1.84	867.64	71.3074
2019-01-03 16:30:00	369.39	266.51	263.02	2.01	867.54	67.2504
2019-01-03 16:45:00	349.38	252.08	246.97	2.17	867.47	63.3418
2019-01-03 17:00:00	305.99	220.77	213.33	2.21	867.49	52.0028
2019-01-03 17:15:00	247.86	178.83	168.65	1.89	867.49	46.6279
2019-01-03 17:30:00	232.74	167.92	155.96	1.92	867.6	36.6151
2019-01-03 17:45:00	206.53	149.01	138.29	1.91	867.73	25.4966
2019-01-03 18:00:00	95.79	69.11	61.3	1.07	867.81	16.2678
2019-01-03 18:15:00	56.35	40.65	33.07	0.95	867.93	7.21957
2019-01-03 18:30:00	105.39	76.04	67.83	0.48	868.07	9.52583
2019-01-03 18:45:00	34.87	25.16	20.49	0.29	868.33	3.4069
2019-01-03 19:00:00	20.62	14.88	11.93	-0.42	868.47	1.87203
2019-01-03 19:15:00	6.92	4.99	3.79	-1.08	868.68	0.355833
2019-01-03 19:30:00	0	0	0	-1.67	868.89	0.259933
2019-01-03 19:45:00	0	0	0	-2.06	869.04	0.268567
2019-01-03 20:00:00	0	0	0	-2.41	869.24	0.263433
2019-01-03 20:15:00	0	0	0	-2.85	869.44	0.269033
2019-01-03 20:30:00	0	0	0	-3.42	869.62	0.268567
2019-01-03 20:45:00	0	0	0	-3.78	869.76	0.2695
2019-01-03 21:00:00	0	0	0	-4.17	869.89	0.2688
2019-01-03 21:15:00	0	0	0	-4.48	870.05	0.2646
2019-01-03 21:30:00	0	0	0	-5.26	870.1	0.255967
2019-01-03 21:45:00	0	0	0	-5.04	870.23	0.259933
2019-01-03 22:00:00	0	0	0	-5.2	870.22	0.258533
2019-01-03 22:15:00	0	0	0	-4.93	870.35	0.2597
2019-01-03 22:30:00	0	0	0	-5.62	870.37	0.262033
2019-01-03 22:45:00	0	0	0	-6.35	870.44	0.265067
2019-01-03 23:00:00	0	0	0	-6.72	870.59	0.262733
2019-01-03 23:15:00	0	0	0	-5.98	870.63	0.262967
2019-01-03 23:30:00	0	0	0	-6.26	870.66	0.265533
2019-01-03 23:45:00	0	0	0	-6.28	870.7	0.264133
2019-01-04 00:00:00	0	0	0	-6.88	870.66	0.271133
2019-01-04 00:15:00	0	0	0	-7.82	870.76	0.269033
2019-01-04 00:30:00	0	0	0	-7.8	870.74	0.266
2019-01-04 00:45:00	0	0	0	-8.42	870.66	0.268333
2019-01-04 01:00:00	0	0	0	-8.52	870.59	0.271133
2019-01-04 01:15:00	0	0	0	-9.02	870.55	0.2744
2019-01-04 01:30:00	0	0	0	-9.38	870.53	0.2695
2019-01-04 01:45:00	0	0	0	-9.42	870.55	0.2688
2019-01-04 02:00:00	0	0	0	-9.57	870.56	0.269967
2019-01-04 02:15:00	0	0	0	-9.61	870.61	0.2709
2019-01-04 02:30:00	0	0	0	-9.47	870.58	0.274633
2019-01-04 02:45:00	0	0	0	-9.52	870.65	0.269033
2019-01-04 03:00:00	0	0	0	-9.96	870.63	0.277667
2019-01-04 03:15:00	0	0	0	-9.87	870.69	0.279533
2019-01-04 03:30:00	0	0	0	-10.07	870.63	0.276033
2019-01-04 03:45:00	0	0	0	-10.13	870.88	0.271133
2019-01-04 04:00:00	0	0	0	-10.54	870.94	0.276733
2019-01-04 04:15:00	0	0	0	-10.33	871.13	0.273233
2019-01-04 04:30:00	0	0	0	-10.34	871.22	0.281867
2019-01-04 04:45:00	0	0	0	-10.51	871.33	0.280233
2019-01-04 05:00:00	0	0	0	-10.46	871.6	0.281167
2019-01-04 05:15:00	0	0	0	-10.59	871.73	0.279767
2019-01-04 05:30:00	0	0	0	-10.58	871.6	0.276733
2019-01-04 05:45:00	0	0	0	-10.79	871.74	0.277667
2019-01-04 06:00:00	0	0	0	-10.97	871.53	0.2751
2019-01-04 06:15:00	0	0	0	-10.6	871.49	0.276267
2019-01-04 06:30:00	0	0	0	-10.57	871.17	0.2765
2019-01-04 06:45:00	0	0	0	-10.55	871.09	0.2779
2019-01-04 07:00:00	0	0	0	-11.03	871.18	0.273233
2019-01-04 07:15:00	0	0	0	-11.08	871.2	0.2765
2019-01-04 07:30:00	0	0	0	-11.09	871.47	0.276967
2019-01-04 07:45:00	0	0	0	-11.38	871.47	0.272767
2019-01-04 08:00:00	0	0	0	-11.16	871.49	0.2765
2019-01-04 08:15:00	0	0	0	-11.04	871.14	0.2716
2019-01-04 08:30:00	0	0	0	-11.31	871.22	0.271133
2019-01-04 08:45:00	0	0	0	-11.43	871.13	0.269733
2019-01-04 09:00:00	0	0	0	-11.41	871.01	0.269967
2019-01-04 09:15:00	0	0	0	-11.53	870.88	0.271367
2019-01-04 09:30:00	0	0	0	-11.36	870.47	0.2786
2019-01-04 09:45:00	0	0	0	-11.01	870.11	0.281867
2019-01-04 10:00:00	0	0	0	-10.93	869.95	0.3542
2019-01-04 10:15:00	5.49	3.96	3.09	-11.02	869.98	2.38653
2019-01-04 10:30:00	32.13	23.18	19.49	-11.15	869.7	6.4932
2019-01-04 10:45:00	56.97	41.1	37.1	-10.32	869.54	9.7062
2019-01-04 11:00:00	87.26	62.96	59.01	-9.4	869.36	13.0853
2019-01-04 11:15:00	126.23	91.07	86.57	-8.35	869.35	20.0247
2019-01-04 11:30:00	164.52	118.7	113	-7.3	868.98	33.4882
2019-01-04 11:45:00	204.71	147.7	140.53	-5.86	868.69	43.8438
2019-01-04 12:00:00	240.79	173.73	166.38	-4.53	868.41	52.5758
2019-01-04 12:15:00	222.15	160.28	190.16	-4.3	867.82	59.8159
2019-01-04 12:30:00	308.73	222.75	139.72	-3.68	867.53	65.6584
2019-01-04 12:45:00	337.55	243.54	238.29	-3.96	867.32	69.9389
2019-01-04 13:00:00	359.65	259.49	255.32	-4.05	866.96	74.6851
2019-01-04 13:15:00	387.73	279.74	277.03	-4.17	866.45	77.1421
2019-01-04 13:30:00	417	300.87	301.68	-4.43	865.96	83.4405
2019-01-04 13:45:00	429.87	310.15	310.98	-2.73	865.57	85.0878
2019-01-04 14:00:00	438.81	316.6	316.32	-2.48	865.14	86.8721
2019-01-04 14:15:00	453.97	327.54	326.35	-3.31	864.78	87.8274
2019-01-04 14:30:00	456.69	329.5	327.54	-3.41	864.67	86.3606
2019-01-04 14:45:00	446.15	321.9	320.19	-2.98	864.36	86.3541
2019-01-04 15:00:00	461.4	332.9	328.42	-2.76	864.03	88.5393
2019-01-04 15:15:00	487.55	351.77	341.18	-1.98	863.75	85.3417
2019-01-04 15:30:00	419.69	302.81	293.5	-1.77	863.4	70.725
2019-01-04 15:45:00	386.53	278.88	260.3	-2.26	863.2	57.299
2019-01-04 16:00:00	338.96	244.56	226.33	-2.36	863.18	59.1493
2019-01-04 16:15:00	316.65	228.47	210.57	-1.77	863.02	56.269
2019-01-04 16:30:00	295.31	213.07	192	-2.31	862.94	47.8336
2019-01-04 16:45:00	223.92	161.56	137.33	-2.26	862.8	30.38
2019-01-04 17:00:00	182.47	131.65	106.29	-2.71	862.86	21.196
2019-01-04 17:15:00	129.34	93.32	72.76	-3.11	862.94	15.8657
2019-01-04 17:30:00	103.97	75.01	57.78	-3.28	862.9	12.309
2019-01-04 17:45:00	87.44	63.09	48.21	-3.4	862.88	11.2602
2019-01-04 18:00:00	84.77	61.16	46.31	-3.67	862.72	11.1081
2019-01-04 18:15:00	80.05	57.75	44.47	-3.81	862.6	9.69173
2019-01-04 18:30:00	69.31	50.01	38.87	-3.91	862.55	8.1193
2019-01-04 18:45:00	46.6	33.62	26.22	-4.09	862.45	4.23757
2019-01-04 19:00:00	27.31	19.7	15	-4.26	862.46	2.2855
2019-01-04 19:15:00	14.01	10.11	7.44	-4.4	862.55	0.916767
2019-01-04 19:30:00	1.49	1.07	0.59	-4.66	862.47	0.1995
2019-01-04 19:45:00	0	0	0	-5.14	862.81	0.273233
2019-01-04 20:00:00	0	0	0	-5.63	863.02	0.273
2019-01-04 20:15:00	0	0	0	-5.89	863.13	0.276967
2019-01-04 20:30:00	0	0	0	-6.17	863.23	0.278367
2019-01-04 20:45:00	0	0	0	-6.4	863.42	0.2786
2019-01-04 21:00:00	0	0	0	-6.41	863.47	0.276733
2019-01-04 21:15:00	0	0	0	-6.56	863.51	0.269267
2019-01-04 21:30:00	0	0	0	-6.51	863.45	0.262967
2019-01-04 21:45:00	0	0	0	-6.54	863.61	0.2639
2019-01-04 22:00:00	0	0	0	-6.78	863.59	0.266933
2019-01-04 22:15:00	0	0	0	-7.02	863.55	0.263667
2019-01-04 22:30:00	0	0	0	-6.96	863.79	0.263667
2019-01-04 22:45:00	0	0	0	-6.92	863.75	0.266933
2019-01-04 23:00:00	0	0	0	-6.86	863.59	0.266467
2019-01-04 23:15:00	0	0	0	-6.67	863.67	0.266233
2019-01-04 23:30:00	0	0	0	-7.07	863.33	0.2639
2019-01-04 23:45:00	0	0	0	-7.23	863.23	0.270433
2019-01-05 00:00:00	0	0	0	-7.35	863	0.270433
2019-01-05 00:15:00	0	0	0	-7.58	863.02	0.2716
2019-01-05 00:30:00	0	0	0	-7.74	863.08	0.268333
2019-01-05 00:45:00	0	0	0	-8.02	862.93	0.273233
2019-01-05 01:00:00	0	0	0	-8.14	862.79	0.271833
2019-01-05 01:15:00	0	0	0	-8.33	862.67	0.266
2019-01-05 01:30:00	0	0	0	-8.53	862.69	0.269733
2019-01-05 01:45:00	0	0	0	-8.23	862.5	0.2709
2019-01-05 02:00:00	0	0	0	-8.41	862.41	0.2709
2019-01-05 02:15:00	0	0	0	-8.78	862.41	0.273933
2019-01-05 02:30:00	0	0	0	-8.81	862.52	0.2709
2019-01-05 02:45:00	0	0	0	-9.26	862.31	0.269267
2019-01-05 03:00:00	0	0	0	-9.43	862.3	0.273933
2019-01-05 03:15:00	0	0	0	-9.67	862.3	0.275333
2019-01-05 03:30:00	0	0	0	-9.78	862.2	0.276033
2019-01-05 03:45:00	0	0	0	-9.87	862.17	0.278133
2019-01-05 04:00:00	0	0	0	-9.84	862.26	0.276267
2019-01-05 04:15:00	0	0	0	-9.83	862.33	0.276267
2019-01-05 04:30:00	0	0	0	-9.68	862.38	0.273467
2019-01-05 04:45:00	0	0	0	-9.52	862.45	0.275333
2019-01-05 05:00:00	0	0	0	-9.59	862.75	0.277667
2019-01-05 05:15:00	0	0	0	-9.77	862.97	0.274867
2019-01-05 05:30:00	0	0	0	-9.78	863.01	0.274867
2019-01-05 05:45:00	0	0	0	-9.7	863	0.278833
2019-01-05 06:00:00	0	0	0	-9.42	862.77	0.271367
2019-01-05 06:15:00	0	0	0	-9.61	862.72	0.272067
2019-01-05 06:30:00	0	0	0	-9.67	862.66	0.269967
2019-01-05 06:45:00	0	0	0	-9.78	862.76	0.274867
2019-01-05 07:00:00	0	0	0	-10.4	862.83	0.271133
2019-01-05 07:15:00	0	0	0	-10.77	862.96	0.272767
2019-01-05 07:30:00	0	0	0	-10.87	862.9	0.2688
2019-01-05 07:45:00	0	0	0	-10.99	862.88	0.270433
2019-01-05 08:00:00	0	0	0	-11.11	862.93	0.271367
2019-01-05 08:15:00	0	0	0	-11.7	863.11	0.266233
2019-01-05 08:30:00	0	0	0	-11.76	863.25	0.269967
2019-01-05 08:45:00	0	0	0	-11.74	863.32	0.269033
2019-01-05 09:00:00	0	0	0	-10.45	863.47	0.269033
2019-01-05 09:15:00	0	0	0	-10.87	863.47	0.268567
2019-01-05 09:30:00	0	0	0	-11.23	863.47	0.274867
2019-01-05 09:45:00	0	0	0	-11.29	863.57	0.295867
2019-01-05 10:00:00	0	0	0	-10.67	863.64	0.181067
2019-01-05 10:15:00	1.89	1.36	0.81	-10.14	863.61	0.898567
2019-01-05 10:30:00	17.12	12.35	9.68	-9.63	863.47	3.27413
2019-01-05 10:45:00	33.9	24.46	18.81	-8.92	863.36	6.04613
2019-01-05 11:00:00	61.23	44.18	35.24	-8.22	863.53	10.6367
2019-01-05 11:15:00	82.87	59.79	47.98	-7.38	863.46	13.213
2019-01-05 11:30:00	103.75	74.85	59.93	-6.6	863.45	18.3825
2019-01-05 11:45:00	160.55	115.83	96.7	-5.6	863.53	28.8176
2019-01-05 12:00:00	180.43	130.18	109.34	-5	863.26	28.1216
2019-01-05 12:15:00	162.86	117.5	98.83	-4.81	863.13	21.1888
2019-01-05 12:30:00	138.43	99.88	77.5	-4.67	862.98	19.4724
2019-01-05 12:45:00	142.74	102.99	79.66	-4.48	862.78	21.5371
2019-01-05 13:00:00	166.32	120	91.93	-4.16	862.65	27.2732
2019-01-05 13:15:00	226.91	163.71	129.88	-3.85	862.54	33.292
2019-01-05 13:30:00	199.86	144.2	112.31	-3.47	862.52	24.2303
2019-01-05 13:45:00	171.95	124.06	94.5	-3.5	862.34	22.5687
2019-01-05 14:00:00	161.93	116.83	90.89	-3.39	862.3	23.4815
2019-01-05 14:15:00	194.92	140.63	111.2	-3.06	862.2	31.3416
2019-01-05 14:30:00	404.53	291.87	262.13	-2.18	862.19	40.4656
2019-01-05 14:45:00	341.85	246.65	216.77	-2.28	861.92	49.3631
2019-01-05 15:00:00	379.92	274.11	247.13	-2.06	861.86	61.6814
2019-01-05 15:15:00	364.84	263.23	233.3	-2.27	861.59	48.8236
2019-01-05 15:30:00	332.32	239.77	210.37	-2.15	861.6	42.1664
2019-01-05 15:45:00	296.62	214.01	172.72	-1.95	861.61	51.2195
2019-01-05 16:00:00	328.09	236.72	205.34	-1.24	861.67	43.5764
2019-01-05 16:15:00	189.11	136.45	110.91	-1.95	861.7	25.3041
2019-01-05 16:30:00	164.53	118.71	96.79	-1.75	861.84	22.1461
2019-01-05 16:45:00	145.78	105.18	76.49	-1.93	862.05	16.3287
2019-01-05 17:00:00	113.04	81.56	58.4	-2.13	862.36	12.3508
2019-01-05 17:15:00	87.15	62.88	44.93	-2.11	862.52	9.91013
2019-01-05 17:30:00	75.59	54.54	39.3	-2.19	862.62	8.6758
2019-01-05 17:45:00	62.51	45.1	31.94	-2.32	862.96	6.23047
2019-01-05 18:00:00	41.95	30.27	21.5	-2.43	863.21	4.59363
2019-01-05 18:15:00	33.8	24.39	16.98	-2.63	863.38	3.41157
2019-01-05 18:30:00	23.56	17	11.9	-2.5	863.56	2.40497
2019-01-05 18:45:00	18.41	13.28	9.05	-2.65	863.85	1.51317
2019-01-05 19:00:00	7.3	5.27	3.33	-2.65	864.04	0.4753
2019-01-05 19:15:00	2.16	1.56	0.53	-3.3	864.26	0.152367
2019-01-05 19:30:00	0	0	0	-3.49	864.59	0.283967
2019-01-05 19:45:00	0	0	0	-3.71	864.86	0.2688
2019-01-05 20:00:00	0	0	0	-3.87	865	0.276967
2019-01-05 20:15:00	0	0	0	-3.99	865.38	0.280233
2019-01-05 20:30:00	0	0	0	-4.07	865.5	0.280467
2019-01-05 20:45:00	0	0	0	-4.16	865.61	0.278367
2019-01-05 21:00:00	0	0	0	-4.19	865.84	0.2765
2019-01-05 21:15:00	0	0	0	-4.18	865.94	0.262967
2019-01-05 21:30:00	0	0	0	-4.27	865.96	0.2653
2019-01-05 21:45:00	0	0	0	-4.28	866.11	0.267633
2019-01-05 22:00:00	0	0	0	-4.37	866.28	0.2653
2019-01-05 22:15:00	0	0	0	-4.52	866.5	0.264833
2019-01-05 22:30:00	0	0	0	-4.52	866.48	0.2653
2019-01-05 22:45:00	0	0	0	-4.5	866.63	0.2653
2019-01-05 23:00:00	0	0	0	-4.6	866.64	0.266933
2019-01-05 23:15:00	0	0	0	-4.43	866.81	0.263667
2019-01-05 23:30:00	0	0	0	-4.53	866.82	0.268333
2019-01-05 23:45:00	0	0	0	-4.46	866.85	0.2653
2019-01-06 00:00:00	0	0	0	-4.44	866.87	0.262733
2019-01-06 00:15:00	0	0	0	-4.44	867	0.265533
2019-01-06 00:30:00	0	0	0	-4.56	866.99	0.2702
2019-01-06 00:45:00	0	0	0	-4.67	867	0.265533
2019-01-06 01:00:00	0	0	0	-4.78	867.1	0.266233
2019-01-06 01:15:00	0	0	0	-5.16	867.4	0.265533
2019-01-06 01:30:00	0	0	0	-5.37	867.49	0.266933
2019-01-06 01:45:00	0	0	0	-5.63	867.62	0.267867
2019-01-06 02:00:00	0	0	0	-5.72	867.74	0.271133
2019-01-06 02:15:00	0	0	0	-5.78	867.88	0.269967
2019-01-06 02:30:00	0	0	0	-5.84	867.9	0.268333
2019-01-06 02:45:00	0	0	0	-5.87	868.19	0.2688
2019-01-06 03:00:00	0	0	0	-5.96	868.38	0.2695
2019-01-06 03:15:00	0	0	0	-6.04	868.62	0.2688
2019-01-06 03:30:00	0	0	0	-6.29	868.68	0.2737
2019-01-06 03:45:00	0	0	0	-6.47	868.73	0.272767
2019-01-06 04:00:00	0	0	0	-6.68	869	0.269267
2019-01-06 04:15:00	0	0	0	-6.73	869	0.267867
2019-01-06 04:30:00	0	0	0	-6.9	869.04	0.2702
2019-01-06 04:45:00	0	0	0	-6.96	869.26	0.269733
2019-01-06 05:00:00	0	0	0	-6.98	869.22	0.272067
2019-01-06 05:15:00	0	0	0	-7.01	869.21	0.273233
2019-01-06 05:30:00	0	0	0	-7.12	869.21	0.268567
2019-01-06 05:45:00	0	0	0	-7.29	869.2	0.273933
2019-01-06 06:00:00	0	0	0	-7.44	869.18	0.2716
2019-01-06 06:15:00	0	0	0	-7.4	869.19	0.2695
2019-01-06 06:30:00	0	0	0	-7.47	868.97	0.270667
2019-01-06 06:45:00	0	0	0	-7.49	868.97	0.269733
2019-01-06 07:00:00	0	0	0	-7.37	868.8	0.269733
2019-01-06 07:15:00	0	0	0	-7.38	868.79	0.269267
2019-01-06 07:30:00	0	0	0	-7.34	868.9	0.2667
2019-01-06 07:45:00	0	0	0	-7.51	869.03	0.272767
2019-01-06 08:00:00	0	0	0	-7.65	869.09	0.272067
2019-01-06 08:15:00	0	0	0	-7.8	869.2	0.2688
2019-01-06 08:30:00	0	0	0	-8.36	869.42	0.271133
2019-01-06 08:45:00	0	0	0	-8.47	869.66	0.269267
2019-01-06 09:00:00	0	0	0	-8.45	869.86	0.2702
2019-01-06 09:15:00	0	0	0	-8.5	870.09	0.270433
2019-01-06 09:30:00	0	0	0	-8.54	870.35	0.269733
2019-01-06 09:45:00	0	0	0	-8.39	870.53	0.290967
2019-01-06 10:00:00	0	0	0	-8.53	870.81	0.309167
2019-01-06 10:15:00	7.6	5.48	3.72	-8.62	870.88	2.1651
2019-01-06 10:30:00	27.96	20.17	15.18	-8.22	871.04	6.00903
2019-01-06 10:45:00	58.59	42.28	33.81	-7.84	871.15	9.142
2019-01-06 11:00:00	86.48	62.4	50.37	-7.1	871.24	12.6462
2019-01-06 11:15:00	110.68	79.86	67.68	-6.15	871.32	14.8762
2019-01-06 11:30:00	115.21	83.12	64.96	-5.64	871.37	17.0784
2019-01-06 11:45:00	132.69	95.74	73.83	-5.37	871.44	19.9001
2019-01-06 12:00:00	144.09	103.96	81.49	-5.19	871.46	28.4235
2019-01-06 12:15:00	228.8	165.08	147.83	-5.03	871.51	37.6014
2019-01-06 12:30:00	166.22	119.93	93.82	-5.22	871.48	25.6506
2019-01-06 12:45:00	245.59	177.19	149.6	-5.1	871.57	34.4822
2019-01-06 13:00:00	160.63	115.9	91.75	-4.6	871.55	22.0607
2019-01-06 13:15:00	155.05	111.87	86.07	-4.6	871.57	23.642
2019-01-06 13:30:00	216.77	156.4	129.3	-4.9	871.68	28.6055
2019-01-06 13:45:00	139.92	100.95	80.75	-5.58	871.69	18.6466
2019-01-06 14:00:00	125.13	90.28	71.32	-5.84	871.7	24.3133
2019-01-06 14:15:00	230.37	166.21	144.74	-5.7	871.83	52.6167
2019-01-06 14:30:00	311.79	224.96	215.69	-4.96	871.64	58.7193
2019-01-06 14:45:00	284.29	205.12	183.84	-4.57	871.47	63.3332
2019-01-06 15:00:00	378.46	273.06	261.08	-3.76	871.33	82.3391
2019-01-06 15:15:00	427.1	308.15	312.2	-3.31	871.07	82.9666
2019-01-06 15:30:00	428.79	309.37	310.43	-2.3	870.95	78.9031
2019-01-06 15:45:00	389.33	280.9	286.36	-1.66	870.74	74.9579
2019-01-06 16:00:00	396.97	286.41	290.24	-2.39	870.66	70.6722
2019-01-06 16:15:00	372.29	268.61	271.83	-2.16	870.65	68.6338
2019-01-06 16:30:00	349.18	251.93	253.68	-1.15	870.6	64.2728
2019-01-06 16:45:00	303.55	219.01	214.45	-2.18	870.68	47.1721
2019-01-06 17:00:00	223.73	161.42	152.58	-1.87	870.64	31.8061
2019-01-06 17:15:00	136.47	98.46	84.18	-2.18	870.81	19.5288
2019-01-06 17:30:00	114.2	82.4	68.14	-2.05	871	16.3315
2019-01-06 17:45:00	111.97	80.79	62.63	-2.65	871.15	14.3808
2019-01-06 18:00:00	95.27	68.73	51.92	-2.85	871.37	11.6977
2019-01-06 18:15:00	77.99	56.27	42.32	-3	871.53	9.1483
2019-01-06 18:30:00	62.2	44.88	33.26	-3.04	871.75	6.83923
2019-01-06 18:45:00	47	33.91	25.01	-3.09	871.97	4.79897
2019-01-06 19:00:00	29.94	21.6	15.42	-3.18	871.99	3.07207
2019-01-06 19:15:00	18.97	13.69	9.57	-3.29	872.01	1.13167
2019-01-06 19:30:00	1.96	1.41	0.69	-3.49	872.09	0.2184
2019-01-06 19:45:00	0	0	0	-3.73	872.24	0.279767
2019-01-06 20:00:00	0	0	0	-4.05	872.44	0.270667
2019-01-06 20:15:00	0	0	0	-4.4	872.62	0.273233
2019-01-06 20:30:00	0	0	0	-4.82	872.8	0.2709
2019-01-06 20:45:00	0	0	0	-5.34	873.01	0.2751
2019-01-06 21:00:00	0	0	0	-5.43	873.2	0.274167
2019-01-06 21:15:00	0	0	0	-5.74	873.45	0.2709
2019-01-06 21:30:00	0	0	0	-5.95	873.5	0.260633
2019-01-06 21:45:00	0	0	0	-6.09	873.7	0.2618
2019-01-06 22:00:00	0	0	0	-6.23	873.81	0.2618
2019-01-06 22:15:00	0	0	0	-6.32	873.91	0.266467
2019-01-06 22:30:00	0	0	0	-6.6	874	0.263667
2019-01-06 22:45:00	0	0	0	-6.63	874.16	0.2646
2019-01-06 23:00:00	0	0	0	-6.95	874.24	0.2646
2019-01-06 23:15:00	0	0	0	-7.26	874.22	0.2639
2019-01-06 23:30:00	0	0	0	-7.26	874.27	0.2639
2019-01-06 23:45:00	0	0	0	-7.61	874.38	0.264133
2019-01-07 00:00:00	0	0	0	-7.85	874.44	0.265767
2019-01-07 00:15:00	0	0	0	-7.78	874.53	0.267867
2019-01-07 00:30:00	0	0	0	-7.9	874.53	0.271833
2019-01-07 00:45:00	0	0	0	-8.06	874.56	0.271833
2019-01-07 01:00:00	0	0	0	-7.97	874.61	0.273
2019-01-07 01:15:00	0	0	0	-8.08	874.67	0.2702
2019-01-07 01:30:00	0	0	0	-8.36	874.7	0.271133
2019-01-07 01:45:00	0	0	0	-8.28	874.78	0.266
2019-01-07 02:00:00	0	0	0	-8.44	874.8	0.2716
2019-01-07 02:15:00	0	0	0	-8.45	874.85	0.272767
2019-01-07 02:30:00	0	0	0	-8.41	874.72	0.2702
2019-01-07 02:45:00	0	0	0	-8.26	874.79	0.269967
2019-01-07 03:00:00	0	0	0	-8.18	874.76	0.273933
2019-01-07 03:15:00	0	0	0	-8.49	874.7	0.271833
2019-01-07 03:30:00	0	0	0	-8.84	874.65	0.274867
2019-01-07 03:45:00	0	0	0	-9.25	874.71	0.274167
2019-01-07 04:00:00	0	0	0	-9.52	874.65	0.274167
2019-01-07 04:15:00	0	0	0	-9.48	874.6	0.274867
2019-01-07 04:30:00	0	0	0	-10.16	874.61	0.276967
2019-01-07 04:45:00	0	0	0	-9.98	874.7	0.269733
2019-01-07 05:00:00	0	0	0	-10.18	874.68	0.270667
2019-01-07 05:15:00	0	0	0	-10.28	874.77	0.2786
2019-01-07 05:30:00	0	0	0	-10.52	874.8	0.277433
2019-01-07 05:45:00	0	0	0	-10.22	874.86	0.275333
2019-01-07 06:00:00	0	0	0	-10.43	874.79	0.2772
2019-01-07 06:15:00	0	0	0	-11.19	874.59	0.2688
2019-01-07 06:30:00	0	0	0	-11.08	874.42	0.279067
2019-01-07 06:45:00	0	0	0	-11.05	874.31	0.2744
2019-01-07 07:00:00	0	0	0	-11.14	874.29	0.275567
2019-01-07 07:15:00	0	0	0	-11.34	874.28	0.275333
2019-01-07 07:30:00	0	0	0	-11.26	874.21	0.2807
2019-01-07 07:45:00	0	0	0	-11.05	874.34	0.268333
2019-01-07 08:00:00	0	0	0	-11.38	874.24	0.273233
2019-01-07 08:15:00	0	0	0	-11.51	874.24	0.266233
2019-01-07 08:30:00	0	0	0	-11.32	874.3	0.271133
2019-01-07 08:45:00	0	0	0	-11.3	874.32	0.270433
2019-01-07 09:00:00	0	0	0	-11.06	874.29	0.2688
2019-01-07 09:15:00	0	0	0	-11.44	874.29	0.274633
2019-01-07 09:30:00	0	0	0	-11.4	874.14	0.2814
2019-01-07 09:45:00	0	0	0	-11.45	874.17	0.287467
2019-01-07 10:00:00	0	0	0	-11.53	874.13	0.4284
2019-01-07 10:15:00	7.29	5.26	4.07	-11.23	874.2	2.30323
2019-01-07 10:30:00	25.07	18.09	14.78	-11.16	874.18	5.38557
2019-01-07 10:45:00	48.43	34.94	30.18	-10.88	874.08	9.19333
2019-01-07 11:00:00	75.69	54.61	49.45	-10.26	874.02	13.4988
2019-01-07 11:15:00	106.67	76.96	71.63	-9.2	873.99	19.435
2019-01-07 11:30:00	140.07	101.06	95.44	-8.38	873.72	28.7635
2019-01-07 11:45:00	173.55	125.22	119.43	-6.72	873.51	37.1387
2019-01-07 12:00:00	206.15	148.74	142.74	-5.4	873.18	44.3387
2019-01-07 12:15:00	200.29	144.51	164.85	-4.65	872.94	51.1495
2019-01-07 12:30:00	257.88	186.06	141.39	-4.79	872.66	57.155
2019-01-07 12:45:00	294.95	212.81	210.13	-5	872.44	63.0604
2019-01-07 13:00:00	322.82	232.91	233.52	-5.4	872.09	68.3202
2019-01-07 13:15:00	346.11	249.72	252.49	-5.19	871.81	72.7916
2019-01-07 13:30:00	365.63	263.8	268.47	-5.15	871.49	76.384
2019-01-07 13:45:00	381.19	275.03	279.89	-4.67	871.26	79.1
2019-01-07 14:00:00	395.94	285.67	290.48	-4.62	871.02	81.1053
2019-01-07 14:15:00	406.95	293.61	298.33	-4.77	870.76	81.9266
2019-01-07 14:30:00	409.19	295.23	299.45	-4.01	870.63	82.257
2019-01-07 14:45:00	411.45	296.86	302.46	-3.96	870.39	82.2162
2019-01-07 15:00:00	409.81	295.68	300.78	-3.89	870.09	81.0308
2019-01-07 15:15:00	403.91	291.42	295.99	-3.03	869.8	79.4745
2019-01-07 15:30:00	397.05	286.47	290.6	-3.4	869.57	77.7709
2019-01-07 15:45:00	387.25	279.4	283.28	-2.72	869.42	75.463
2019-01-07 16:00:00	377.93	272.68	276.28	-3	869.13	72.3765
2019-01-07 16:15:00	360.59	260.16	262.36	-3.01	869.04	68.4304
2019-01-07 16:30:00	338.15	243.97	244.27	-2.84	868.97	63.959
2019-01-07 16:45:00	316.48	228.34	227.46	-2.93	868.86	59.5474
2019-01-07 17:00:00	290.79	209.81	206.74	-3.25	868.69	54.3706
2019-01-07 17:15:00	262.74	189.57	185.01	-2.67	868.69	48.2939
2019-01-07 17:30:00	233.05	168.15	162.3	-2.69	868.47	41.0835
2019-01-07 17:45:00	201.42	145.32	138.27	-3.04	868.48	33.6035
2019-01-07 18:00:00	168.41	121.51	114.3	-3.11	868.43	24.7774
2019-01-07 18:15:00	133.6	96.39	89.52	-2.73	868.51	16.4514
2019-01-07 18:30:00	100.1	72.22	65.81	-3.33	868.51	11.5271
2019-01-07 18:45:00	66.85	48.23	42.68	-3.32	868.54	7.4382
2019-01-07 19:00:00	40.72	29.38	25.19	-3.68	868.47	3.80753
2019-01-07 19:15:00	7.52	5.43	4.27	-3.94	868.49	0.374267
2019-01-07 19:30:00	0	0	0	-4.23	868.57	0.1974
2019-01-07 19:45:00	0	0	0	-4.68	868.71	0.287467
2019-01-07 20:00:00	0	0	0	-5	868.73	0.271133
2019-01-07 20:15:00	0	0	0	-5.38	868.81	0.275567
2019-01-07 20:30:00	0	0	0	-6.2	868.87	0.2744
2019-01-07 20:45:00	0	0	0	-7.64	868.99	0.2765
2019-01-07 21:00:00	0	0	0	-7.94	869.07	0.276967
2019-01-07 21:15:00	0	0	0	-8.28	869.29	0.273467
2019-01-07 21:30:00	0	0	0	-8.5	869.51	0.2667
2019-01-07 21:45:00	0	0	0	-8.3	869.53	0.265533
2019-01-07 22:00:00	0	0	0	-8.51	869.58	0.265533
2019-01-07 22:15:00	0	0	0	-8.67	869.57	0.265067
2019-01-07 22:30:00	0	0	0	-8.93	869.71	0.2681
2019-01-07 22:45:00	0	0	0	-9.16	869.73	0.271367
2019-01-07 23:00:00	0	0	0	-9.59	869.64	0.271133
2019-01-07 23:15:00	0	0	0	-9.57	869.56	0.270667
2019-01-07 23:30:00	0	0	0	-9.37	869.49	0.273467
2019-01-07 23:45:00	0	0	0	-9.21	869.39	0.269967
2019-01-08 00:00:00	0	0	0	-9.38	869.21	0.272533
2019-01-08 00:15:00	0	0	0	-9.59	869.18	0.268567
2019-01-08 00:30:00	0	0	0	-9.42	869.08	0.269033
2019-01-08 00:45:00	0	0	0	-9.52	868.95	0.268567
2019-01-08 01:00:00	0	0	0	-9.79	868.97	0.266233
2019-01-08 01:15:00	0	0	0	-9.76	868.91	0.2709
2019-01-08 01:30:00	0	0	0	-9.99	868.89	0.271367
2019-01-08 01:45:00	0	0	0	-10.12	868.86	0.2723
2019-01-08 02:00:00	0	0	0	-10.36	868.9	0.276967
2019-01-08 02:15:00	0	0	0	-10.39	868.86	0.273
2019-01-08 02:30:00	0	0	0	-10.64	868.82	0.274167
2019-01-08 02:45:00	0	0	0	-10.71	868.99	0.2772
2019-01-08 03:00:00	0	0	0	-11.77	868.96	0.276267
2019-01-08 03:15:00	0	0	0	-11.63	869.05	0.274867
2019-01-08 03:30:00	0	0	0	-11.07	869.13	0.280467
2019-01-08 03:45:00	0	0	0	-10.5	868.91	0.2786
2019-01-08 04:00:00	0	0	0	-10.13	868.52	0.277433
2019-01-08 04:15:00	0	0	0	-9.94	868.31	0.2765
2019-01-08 04:30:00	0	0	0	-9.86	868.42	0.278833
2019-01-08 04:45:00	0	0	0	-9.29	868.61	0.2751
2019-01-08 05:00:00	0	0	0	-8.91	868.47	0.270667
2019-01-08 05:15:00	0	0	0	-8.43	868.54	0.2814
2019-01-08 05:30:00	0	0	0	-8.47	868.4	0.271833
2019-01-08 05:45:00	0	0	0	-8.99	868.26	0.274867
2019-01-08 06:00:00	0	0	0	-9.49	868.26	0.272533
2019-01-08 06:15:00	0	0	0	-10.38	868.06	0.2758
2019-01-08 06:30:00	0	0	0	-10.76	868.27	0.2737
2019-01-08 06:45:00	0	0	0	-10.92	868.11	0.2772
2019-01-08 07:00:00	0	0	0	-10.56	868.29	0.271367
2019-01-08 07:15:00	0	0	0	-10.65	868.41	0.2709
2019-01-08 07:30:00	0	0	0	-10.96	868.26	0.273467
2019-01-08 07:45:00	0	0	0	-11.42	868.07	0.275567
2019-01-08 08:00:00	0	0	0	-11.18	867.71	0.2709
2019-01-08 08:15:00	0	0	0	-11.27	867.5	0.274633
2019-01-08 08:30:00	0	0	0	-11.52	867.52	0.271133
2019-01-08 08:45:00	0	0	0	-11.62	867.54	0.272767
2019-01-08 09:00:00	0	0	0	-11.71	867.5	0.2758
2019-01-08 09:15:00	0	0	0	-11.86	867.47	0.276267
2019-01-08 09:30:00	0	0	0	-11.95	867.27	0.285133
2019-01-08 09:45:00	0	0	0	-12.04	867.28	0.268567
2019-01-08 10:00:00	0	0	0	-11.9	867.44	0.476
2019-01-08 10:15:00	9.8	7.07	5.54	-12.05	867.55	3.58447
2019-01-08 10:30:00	42.02	30.32	24.33	-11.42	867.61	9.8175
2019-01-08 10:45:00	83.33	60.12	49.78	-10.73	867.7	11.5929
2019-01-08 11:00:00	75.04	54.14	44.4	-9.73	867.71	10.287
2019-01-08 11:15:00	84.99	61.32	50.99	-9.04	867.62	16.8973
2019-01-08 11:30:00	141.28	101.93	92.58	-8.16	867.34	27.9676
2019-01-08 11:45:00	177.79	128.28	119.67	-7.55	867.4	37.3595
2019-01-08 12:00:00	238.57	172.13	153.46	-6.61	867.16	42.4867
2019-01-08 12:15:00	230.29	166.16	167.41	-6.51	866.94	43.1562
2019-01-08 12:30:00	239.22	172.6	140.84	-6.81	866.74	33.4145
2019-01-08 12:45:00	261.34	188.56	174.91	-6.96	866.8	39.2609
2019-01-08 13:00:00	227.95	164.46	146.35	-6.9	866.75	54.33
2019-01-08 13:15:00	375.23	270.73	253.6	-6.66	866.49	54.6677
2019-01-08 13:30:00	222.38	160.45	126.15	-6.37	866.02	31.9223
2019-01-08 13:45:00	211.64	152.7	121.43	-6.04	865.51	43.8032
2019-01-08 14:00:00	323.39	233.32	207.55	-5.33	865.4	56.7835
2019-01-08 14:15:00	417.46	301.2	282.21	-5.34	864.87	64.6564
2019-01-08 14:30:00	385.36	278.04	249.45	-4.77	864.68	62.6915
2019-01-08 14:45:00	349.35	252.05	222.71	-5.13	864.52	59.6442
2019-01-08 15:00:00	347.7	250.87	227.46	-4.88	864.48	76.2673
2019-01-08 15:15:00	429.54	309.91	310.42	-4.2	864.49	83.055
2019-01-08 15:30:00	408.11	294.45	298.6	-3.87	864.32	80.5905
2019-01-08 15:45:00	396.89	286.35	290.74	-3.85	864.41	76.0674
2019-01-08 16:00:00	371.79	268.25	270.43	-3.2	864.2	72.223
2019-01-08 16:15:00	351.49	253.6	254.26	-3.63	863.93	59.0289
2019-01-08 16:30:00	286.49	206.7	200.42	-3.87	863.71	54.1847
2019-01-08 16:45:00	262.59	189.46	171.65	-3.78	863.58	37.489
2019-01-08 17:00:00	178.5	128.79	105.79	-3.6	863.45	22.4355
2019-01-08 17:15:00	128.69	92.85	72.28	-4.14	863.5	19.9736
2019-01-08 17:30:00	128.35	92.6	71.71	-4.04	863.57	17.8295
2019-01-08 17:45:00	127.23	91.79	70.2	-4.05	863.63	16.25
2019-01-08 18:00:00	91.77	66.21	52.07	-3.87	863.69	10.3224
2019-01-08 18:15:00	67.87	48.97	38.09	-4.15	863.78	9.74353
2019-01-08 18:30:00	66.89	48.26	38.46	-4.19	864	6.04567
2019-01-08 18:45:00	32.23	23.25	17.7	-4.24	864.1	3.45683
2019-01-08 19:00:00	21.19	15.29	11	-4.42	864.14	1.92897
2019-01-08 19:15:00	10.69	7.71	5.31	-4.48	864.27	0.739667
2019-01-08 19:30:00	2.05	1.48	0.66	-4.64	864.3	0.203
2019-01-08 19:45:00	0	0	0	-4.69	864.33	0.279067
2019-01-08 20:00:00	0	0	0	-5.23	864.48	0.2709
2019-01-08 20:15:00	0	0	0	-5.5	864.54	0.273467
2019-01-08 20:30:00	0	0	0	-5.61	864.66	0.274867
2019-01-08 20:45:00	0	0	0	-5.64	864.8	0.278367
2019-01-08 21:00:00	0	0	0	-5.91	865	0.278133
2019-01-08 21:15:00	0	0	0	-6.1	865.09	0.2737
2019-01-08 21:30:00	0	0	0	-6.37	865.23	0.2639
2019-01-08 21:45:00	0	0	0	-6.39	865.33	0.265067
2019-01-08 22:00:00	0	0	0	-6.24	865.36	0.2667
2019-01-08 22:15:00	0	0	0	-6.3	865.47	0.2618
2019-01-08 22:30:00	0	0	0	-6.38	865.41	0.267867
2019-01-08 22:45:00	0	0	0	-6.46	865.39	0.265067
2019-01-08 23:00:00	0	0	0	-6.5	865.5	0.2709
2019-01-08 23:15:00	0	0	0	-6.48	865.58	0.2681
2019-01-08 23:30:00	0	0	0	-6.61	865.49	0.267633
2019-01-08 23:45:00	0	0	0	-6.75	865.58	0.272067
2019-01-09 00:00:00	0	0	0	-7.27	865.74	0.270433
2019-01-09 00:15:00	0	0	0	-6.87	865.71	0.271367
2019-01-09 00:30:00	0	0	0	-6.59	865.85	0.272767
2019-01-09 00:45:00	0	0	0	-7.38	865.85	0.264833
2019-01-09 01:00:00	0	0	0	-7.02	865.94	0.264133
2019-01-09 01:15:00	0	0	0	-7.85	865.96	0.2681
2019-01-09 01:30:00	0	0	0	-7.89	866.01	0.2667
2019-01-09 01:45:00	0	0	0	-7.57	865.93	0.2716
2019-01-09 02:00:00	0	0	0	-7.7	865.93	0.268333
2019-01-09 02:15:00	0	0	0	-7.71	865.98	0.268567
2019-01-09 02:30:00	0	0	0	-7.82	866	0.270433
2019-01-09 02:45:00	0	0	0	-7.33	865.98	0.2695
2019-01-09 03:00:00	0	0	0	-7.56	865.99	0.2688
2019-01-09 03:15:00	0	0	0	-7.27	865.99	0.2765
2019-01-09 03:30:00	0	0	0	-7.09	866.04	0.270667
2019-01-09 03:45:00	0	0	0	-7.23	866.15	0.272533
2019-01-09 04:00:00	0	0	0	-7.16	866.18	0.2716
2019-01-09 04:15:00	0	0	0	-7.13	866.28	0.269033
2019-01-09 04:30:00	0	0	0	-7.02	866.27	0.272767
2019-01-09 04:45:00	0	0	0	-7.54	866.17	0.272067
2019-01-09 05:00:00	0	0	0	-7.74	866.36	0.2765
2019-01-09 05:15:00	0	0	0	-7.47	866.31	0.273933
2019-01-09 05:30:00	0	0	0	-6.97	866.32	0.276733
2019-01-09 05:45:00	0	0	0	-6.91	866.26	0.2674
2019-01-09 06:00:00	0	0	0	-6.81	866.25	0.2688
2019-01-09 06:15:00	0	0	0	-6.67	866.33	0.2779
2019-01-09 06:30:00	0	0	0	-7.04	865.87	0.272533
2019-01-09 06:45:00	0	0	0	-6.93	865.68	0.275333
2019-01-09 07:00:00	0	0	0	-6.91	865.66	0.279067
2019-01-09 07:15:00	0	0	0	-6.52	865.64	0.2765
2019-01-09 07:30:00	0	0	0	-6.29	865.49	0.2772
2019-01-09 07:45:00	0	0	0	-6.4	865.59	0.271133
2019-01-09 08:00:00	0	0	0	-6.47	865.62	0.2653
2019-01-09 08:15:00	0	0	0	-7.05	865.77	0.2674
2019-01-09 08:30:00	0	0	0	-7.42	865.98	0.266
2019-01-09 08:45:00	0	0	0	-7.7	866.21	0.265533
2019-01-09 09:00:00	0	0	0	-8.4	866.49	0.266233
2019-01-09 09:15:00	0	0	0	-8.7	866.65	0.266
2019-01-09 09:30:00	0	0	0	-8.6	866.69	0.271133
2019-01-09 09:45:00	0	0	0	-8.49	866.91	0.289567
2019-01-09 10:00:00	0	0	0	-8.73	867.13	0.227967
2019-01-09 10:15:00	4.26	3.07	2.26	-8.87	867.46	1.68747
2019-01-09 10:30:00	21.09	15.22	11.93	-8.8	867.62	4.1888
2019-01-09 10:45:00	33.71	24.32	20.01	-8.51	867.7	6.82337
2019-01-09 11:00:00	69.7	50.29	47.12	-8.36	867.71	13.2592
2019-01-09 11:15:00	114.76	82.8	81.91	-7.43	867.72	21.318
2019-01-09 11:30:00	137.98	99.55	99.06	-6.57	867.74	26.9502
2019-01-09 11:45:00	152.32	109.9	106.39	-6.6	867.8	32.2821
2019-01-09 12:00:00	179.46	129.48	125.79	-6.38	867.62	43.2409
2019-01-09 12:15:00	210.08	151.57	175.2	-5.43	867.63	58.8103
2019-01-09 12:30:00	259.31	187.09	167.51	-4.31	867.46	63.1682
2019-01-09 12:45:00	310.69	224.17	218.24	-4.08	867.18	69.724
2019-01-09 13:00:00	316.22	228.15	220.05	-3	866.89	56.2935
2019-01-09 13:15:00	276.87	199.76	188.35	-2.58	866.64	49.9378
2019-01-09 13:30:00	238.75	172.26	153.12	-2.64	866.55	47.7085
2019-01-09 13:45:00	275.39	198.7	168.9	-2.56	866.33	39.7661
2019-01-09 14:00:00	216.77	156.4	120.75	-2.6	866.09	33.7661
2019-01-09 14:15:00	232.59	167.82	131.44	-2.4	865.97	33.348
2019-01-09 14:30:00	220.56	159.13	121.39	-2.27	865.81	28.4123
2019-01-09 14:45:00	194.13	140.06	102.5	-2.18	865.73	25.5628
2019-01-09 15:00:00	190.02	137.1	102.95	-2.1	865.64	26.0514
2019-01-09 15:15:00	170.93	123.32	91.74	-1.93	865.49	21.126
2019-01-09 15:30:00	158.57	114.41	83.07	-2.07	865.4	33.1399
2019-01-09 15:45:00	238.37	171.99	144.3	-1.49	865.37	44.3564
2019-01-09 16:00:00	261.25	188.49	152.79	-0.5	865.14	36.397
2019-01-09 16:15:00	263.23	189.92	151.19	-0.59	865.08	29.8443
2019-01-09 16:30:00	139.27	100.48	89.29	-0.94	864.98	46.826
2019-01-09 16:45:00	453.6	327.27	303.11	0.48	864.98	79.2853
2019-01-09 17:00:00	378.89	273.37	258.05	0.81	864.81	63.7341
2019-01-09 17:15:00	282.76	204.01	205.37	0.71	864.89	55.4174
2019-01-09 17:30:00	246.74	178.02	177.18	0.94	865.02	48.6127
2019-01-09 17:45:00	219.67	158.49	155.76	1.01	865.08	40.8431
2019-01-09 18:00:00	184.77	133.31	130.9	0.99	865.27	30.3863
2019-01-09 18:15:00	151.87	109.57	107.2	0.63	865.3	17.5653
2019-01-09 18:30:00	118.1	85.21	82.45	0.57	865.3	11.3843
2019-01-09 18:45:00	82.82	59.75	57.37	0.32	865.42	7.8008
2019-01-09 19:00:00	43.21	31.18	28.32	-0.01	865.63	3.80847
2019-01-09 19:15:00	13.44	9.69	8.32	-0.74	865.81	1.68187
2019-01-09 19:30:00	3.45	2.49	1.77	-1.38	866.04	0.303567
2019-01-09 19:45:00	0	0	0	-2.35	866.17	0.308
2019-01-09 20:00:00	0	0	0	-2.63	866.32	0.269967
2019-01-09 20:15:00	0	0	0	-3.22	866.52	0.269733
2019-01-09 20:30:00	0	0	0	-3.55	866.66	0.271133
2019-01-09 20:45:00	0	0	0	-3	866.72	0.270433
2019-01-09 21:00:00	0	0	0	-3.28	866.78	0.2751
2019-01-09 21:15:00	0	0	0	-3.36	866.83	0.278367
2019-01-09 21:30:00	0	0	0	-4.19	866.89	0.262967
2019-01-09 21:45:00	0	0	0	-4.39	866.97	0.262267
2019-01-09 22:00:00	0	0	0	-4.54	866.99	0.2604
2019-01-09 22:15:00	0	0	0	-5.26	867	0.265067
2019-01-09 22:30:00	0	0	0	-5.28	867.02	0.265533
2019-01-09 22:45:00	0	0	0	-5.88	867.1	0.263667
2019-01-09 23:00:00	0	0	0	-6.85	867.18	0.261333
2019-01-09 23:15:00	0	0	0	-7.01	867.33	0.263667
2019-01-09 23:30:00	0	0	0	-6.84	867.31	0.2667
2019-01-09 23:45:00	0	0	0	-7.29	867.41	0.266933
2019-01-10 00:00:00	0	0	0	-7.34	867.38	0.2716
2019-01-10 00:15:00	0	0	0	-7.66	867.49	0.272533
2019-01-10 00:30:00	0	0	0	-7.68	867.51	0.271833
2019-01-10 00:45:00	0	0	0	-7.61	867.51	0.262033
2019-01-10 01:00:00	0	0	0	-8.53	867.48	0.268567
2019-01-10 01:15:00	0	0	0	-8.73	867.45	0.271133
2019-01-10 01:30:00	0	0	0	-8.8	867.42	0.269967
2019-01-10 01:45:00	0	0	0	-8.56	867.39	0.266933
2019-01-10 02:00:00	0	0	0	-8.5	867.47	0.2702
2019-01-10 02:15:00	0	0	0	-8.74	867.5	0.271367
2019-01-10 02:30:00	0	0	0	-9.01	867.67	0.2716
2019-01-10 02:45:00	0	0	0	-9.1	867.91	0.267867
2019-01-10 03:00:00	0	0	0	-9.42	868.03	0.268567
2019-01-10 03:15:00	0	0	0	-9.6	868.15	0.276967
2019-01-10 03:30:00	0	0	0	-9.71	868.21	0.2674
2019-01-10 03:45:00	0	0	0	-10.13	868.15	0.273467
2019-01-10 04:00:00	0	0	0	-10.37	868.14	0.271833
2019-01-10 04:15:00	0	0	0	-10.46	868.16	0.2744
2019-01-10 04:30:00	0	0	0	-10.38	868.13	0.2716
2019-01-10 04:45:00	0	0	0	-10.26	868.13	0.277667
2019-01-10 05:00:00	0	0	0	-10.35	867.95	0.273233
2019-01-10 05:15:00	0	0	0	-10.08	867.83	0.273
2019-01-10 05:30:00	0	0	0	-10.06	867.8	0.272067
2019-01-10 05:45:00	0	0	0	-10.13	867.65	0.2737
2019-01-10 06:00:00	0	0	0	-9.77	867.54	0.2737
2019-01-10 06:15:00	0	0	0	-9.52	867.36	0.2702
2019-01-10 06:30:00	0	0	0	-9.28	867.16	0.274633
2019-01-10 06:45:00	0	0	0	-9.97	867.12	0.272767
2019-01-10 07:00:00	0	0	0	-10.36	867.13	0.2744
2019-01-10 07:15:00	0	0	0	-10.81	867.16	0.274633
2019-01-10 07:30:00	0	0	0	-10.81	867	0.2674
2019-01-10 07:45:00	0	0	0	-10.9	867.11	0.269033
2019-01-10 08:00:00	0	0	0	-11.07	867.01	0.272067
2019-01-10 08:15:00	0	0	0	-10.39	867.17	0.274633
2019-01-10 08:30:00	0	0	0	-10.24	866.9	0.273467
2019-01-10 08:45:00	0	0	0	-10.36	867.15	0.273
2019-01-10 09:00:00	0	0	0	-10.71	867.37	0.271833
2019-01-10 09:15:00	0	0	0	-10.9	867.46	0.269033
2019-01-10 09:30:00	0	0	0	-10.77	868.04	0.276733
2019-01-10 09:45:00	0	0	0	-10.34	868.35	0.2681
2019-01-10 10:00:00	0	0	0	-10.54	868.48	0.894367
2019-01-10 10:15:00	13.29	9.59	7.77	-10.37	868.43	2.71553
2019-01-10 10:30:00	30.29	21.85	18.62	-10.66	868.53	4.13303
2019-01-10 10:45:00	36.67	26.45	24.18	-10.17	868.33	9.219
2019-01-10 11:00:00	87.11	62.85	63.16	-9.23	868.11	14.2415
2019-01-10 11:15:00	122.86	88.64	89.7	-7.97	867.9	23.1264
2019-01-10 11:30:00	162.09	116.95	118.5	-6.89	867.29	37.0048
2019-01-10 11:45:00	198.07	142.91	143.21	-7.25	866.84	48.2293
2019-01-10 12:00:00	237.48	171.34	171.28	-7.38	866.8	55.5196
2019-01-10 12:15:00	240.19	173.29	195.73	-6.79	866.47	63.2128
2019-01-10 12:30:00	233.19	168.25	165.3	-5.95	866.25	69.3674
2019-01-10 12:45:00	328.28	236.85	243.77	-5.69	866.15	74.6279
2019-01-10 13:00:00	355.95	256.82	268.83	-4.53	865.9	79.1777
2019-01-10 13:15:00	372.48	268.74	284.11	-3.83	865.48	81.4249
2019-01-10 13:30:00	390.19	281.52	296.73	-3.32	865.01	84.3607
2019-01-10 13:45:00	405.03	292.23	308.29	-2	864.68	88.0672
2019-01-10 14:00:00	425.39	306.92	323.17	-1.72	864.3	91.1311
2019-01-10 14:15:00	438.55	316.42	331.97	-2.92	864.06	90.6078
2019-01-10 14:30:00	430.21	310.4	323.11	-1.71	863.81	86.2101
2019-01-10 14:45:00	432.23	311.86	319.53	-1.03	863.59	86.4234
2019-01-10 15:00:00	440.71	317.97	325.7	-1.42	863.43	89.0631
2019-01-10 15:15:00	422.97	305.17	315.35	-1.37	863.2	85.1412
2019-01-10 15:30:00	416.53	300.53	306.47	-0.55	863.02	69.8336
2019-01-10 15:45:00	342.79	247.32	244.58	-0.47	862.81	71.7997
2019-01-10 16:00:00	360.94	260.42	259.27	-0.6	862.63	69.1497
2019-01-10 16:15:00	385.07	277.83	277.63	-1.23	862.38	68.5533
2019-01-10 16:30:00	372.76	268.95	270.55	-0.12	862.05	68.7073
2019-01-10 16:45:00	313.61	226.27	226.4	0.08	861.98	58.5548
2019-01-10 17:00:00	261.59	188.73	186.38	-0.76	861.89	48.8567
2019-01-10 17:15:00	246.07	177.54	169.54	0.24	862.05	36.1898
2019-01-10 17:30:00	185.31	133.7	121.67	-0.39	862.13	34.527
2019-01-10 17:45:00	169.81	122.52	105.85	-0.94	862.13	23.8091
2019-01-10 18:00:00	114.29	82.46	65.92	-0.43	862.12	13.0968
2019-01-10 18:15:00	80.95	58.4	44.02	-0.56	862.41	10.028
2019-01-10 18:30:00	64.16	46.29	34.19	-1.09	862.42	7.0322
2019-01-10 18:45:00	44.85	32.36	23.77	-1.01	862.36	4.80013
2019-01-10 19:00:00	30.39	21.93	15.67	-1.17	862.3	3.08257
2019-01-10 19:15:00	18.44	13.3	9.13	-1.43	862.11	1.0619
2019-01-10 19:30:00	0.48	0.35	0.08	-2.06	862.08	0.266933
2019-01-10 19:45:00	0	0	0	-2.59	862.08	0.274867
2019-01-10 20:00:00	0	0	0	-2.89	862.23	0.272533
2019-01-10 20:15:00	0	0	0	-3.1	862.26	0.272067
2019-01-10 20:30:00	0	0	0	-3.42	862.66	0.28
2019-01-10 20:45:00	0	0	0	-3.68	862.88	0.278133
2019-01-10 21:00:00	0	0	0	-3.87	863.07	0.270433
2019-01-10 21:15:00	0	0	0	-4.19	863.11	0.266233
2019-01-10 21:30:00	0	0	0	-4.28	863.19	0.2576
2019-01-10 21:45:00	0	0	0	-4.29	863.3	0.2583
2019-01-10 22:00:00	0	0	0	-4.24	863.4	0.2569
2019-01-10 22:15:00	0	0	0	-4.34	863.28	0.258533
2019-01-10 22:30:00	0	0	0	-4.47	863.28	0.258533
2019-01-10 22:45:00	0	0	0	-4.39	863.24	0.259233
2019-01-10 23:00:00	0	0	0	-4.44	863.31	0.2604
2019-01-10 23:15:00	0	0	0	-4.52	863.33	0.259233
2019-01-10 23:30:00	0	0	0	-4.61	863.33	0.259233
2019-01-10 23:45:00	0	0	0	-4.83	863.29	0.263433
2019-01-11 00:00:00	0	0	0	-4.87	863.12	0.2632
2019-01-11 00:15:00	0	0	0	-5.35	862.99	0.260867
2019-01-11 00:30:00	0	0	0	-5.28	862.95	0.266233
2019-01-11 00:45:00	0	0	0	-5.61	862.96	0.2667
2019-01-11 01:00:00	0	0	0	-5.74	862.84	0.2639
2019-01-11 01:15:00	0	0	0	-5.9	862.83	0.2611
2019-01-11 01:30:00	0	0	0	-5.86	862.62	0.263433
2019-01-11 01:45:00	0	0	0	-6	862.55	0.266233
2019-01-11 02:00:00	0	0	0	-5.81	862.41	0.267167
2019-01-11 02:15:00	0	0	0	-5.75	862.46	0.2674
2019-01-11 02:30:00	0	0	0	-5.78	862.55	0.266233
2019-01-11 02:45:00	0	0	0	-5.98	862.25	0.269267
2019-01-11 03:00:00	0	0	0	-5.88	862.28	0.269733
2019-01-11 03:15:00	0	0	0	-6.66	862.47	0.267867
2019-01-11 03:30:00	0	0	0	-6.9	862.66	0.2625
2019-01-11 03:45:00	0	0	0	-7.36	862.76	0.2625
2019-01-11 04:00:00	0	0	0	-8.42	862.75	0.2681
2019-01-11 04:15:00	0	0	0	-7.72	862.86	0.266933
2019-01-11 04:30:00	0	0	0	-7.96	862.97	0.263433
2019-01-11 04:45:00	0	0	0	-8.38	862.9	0.267633
2019-01-11 05:00:00	0	0	0	-7.91	862.81	0.266467
2019-01-11 05:15:00	0	0	0	-8.51	862.83	0.273233
2019-01-11 05:30:00	0	0	0	-8.4	862.82	0.2702
2019-01-11 05:45:00	0	0	0	-8.05	862.8	0.269033
2019-01-11 06:00:00	0	0	0	-6.94	862.49	0.2716
2019-01-11 06:15:00	0	0	0	-7.33	862.43	0.2702
2019-01-11 06:30:00	0	0	0	-7.5	862.32	0.269033
2019-01-11 06:45:00	0	0	0	-7.79	862.16	0.2737
2019-01-11 07:00:00	0	0	0	-7.2	862.3	0.2709
2019-01-11 07:15:00	0	0	0	-7.27	862.19	0.267633
2019-01-11 07:30:00	0	0	0	-7.67	862.25	0.270667
2019-01-11 07:45:00	0	0	0	-7.98	862.45	0.262733
2019-01-11 08:00:00	0	0	0	-8.46	862.56	0.264133
2019-01-11 08:15:00	0	0	0	-9.07	862.79	0.265067
2019-01-11 08:30:00	0	0	0	-9.52	862.99	0.2625
2019-01-11 08:45:00	0	0	0	-9.28	863.15	0.269033
2019-01-11 09:00:00	0	0	0	-8.94	863.22	0.267633
2019-01-11 09:15:00	0	0	0	-9.4	863.32	0.266467
2019-01-11 09:30:00	0	0	0	-9.04	863.36	0.266
2019-01-11 09:45:00	0	0	0	-8.69	863.47	0.2849
2019-01-11 10:00:00	0	0	0	-8.63	863.54	0.174533
2019-01-11 10:15:00	1.33	0.96	0.62	-8.4	863.54	0.4571
2019-01-11 10:30:00	11.43	8.25	6.05	-7.99	863.57	2.19567
2019-01-11 10:45:00	24.25	17.5	13.5	-8.42	863.65	5.00897
2019-01-11 11:00:00	60.28	43.49	34.27	-8.28	863.67	10.5488
2019-01-11 11:15:00	78.49	56.63	43.42	-8.02	863.84	11.819
2019-01-11 11:30:00	106.35	76.73	69.54	-7.16	863.8	11.9978
2019-01-11 11:45:00	79.54	57.39	44.36	-6.86	863.73	14.3948
2019-01-11 12:00:00	91.39	65.94	52.24	-6.7	863.64	14.0506
2019-01-11 12:15:00	87.91	63.42	46.27	-6.53	863.63	27.4811
2019-01-11 12:30:00	165.64	119.51	117.44	-5.97	863.59	32.3239
2019-01-11 12:45:00	144.67	104.38	95.43	-5.92	863.41	44.418
2019-01-11 13:00:00	158.32	114.23	103.41	-4.93	863.28	19.324
2019-01-11 13:15:00	243.87	175.95	178.69	-5.06	863.13	53.3752
2019-01-11 13:30:00	360.74	260.27	260.59	-2.86	862.89	75.8858
2019-01-11 13:45:00	325.77	235.05	237.15	-2.7	862.39	71.2873
2019-01-11 14:00:00	436.99	315.29	316.78	-1.77	862.03	77.9123
2019-01-11 14:15:00	438.06	316.06	318.93	-1.53	861.81	86.2458
2019-01-11 14:30:00	432.47	312.03	314.64	-1.58	861.52	94.7604
2019-01-11 14:45:00	504.41	363.93	364.27	-0.39	861.24	94.671
2019-01-11 15:00:00	465.66	335.97	346.74	-0.17	860.92	89.5193
2019-01-11 15:15:00	437.82	315.89	328.23	0.18	860.77	84.536
2019-01-11 15:30:00	418.79	302.16	312.83	0.38	860.82	82.2136
2019-01-11 15:45:00	405.49	292.56	303.45	0.6	860.73	81.4732
2019-01-11 16:00:00	392.07	282.88	293.52	0.92	860.7	79.3361
2019-01-11 16:15:00	378.57	273.14	283.23	1.22	860.45	75.7906
2019-01-11 16:30:00	357.95	258.26	265.29	1.41	860.38	70.0933
2019-01-11 16:45:00	340.36	245.57	250.63	1.32	860.36	61.5851
2019-01-11 17:00:00	226.98	163.77	163.47	1.04	860.42	32.6741
2019-01-11 17:15:00	115.14	83.07	78.45	0.35	860.44	32.9852
2019-01-11 17:30:00	177.58	128.12	114.25	0.56	860.49	34.7447
2019-01-11 17:45:00	156.66	113.03	92.98	0.87	860.57	19.768
2019-01-11 18:00:00	111.69	80.59	60.98	0.11	860.7	14.3628
2019-01-11 18:15:00	93.59	67.53	48.08	-0.15	860.68	10.4501
2019-01-11 18:30:00	69.38	50.06	37.36	-0.31	860.81	9.11587
2019-01-11 18:45:00	55.48	40.03	29.7	-0.46	860.94	5.467
2019-01-11 19:00:00	37.7	27.2	18.95	-0.77	861.06	3.6141
2019-01-11 19:15:00	18.87	13.61	9.52	-1.09	861.15	0.804767
2019-01-11 19:30:00	1.06	0.76	0.26	-1.48	861.39	0.1799
2019-01-11 19:45:00	0	0	0	-1.89	861.38	0.281167
2019-01-11 20:00:00	0	0	0	-2.18	861.72	0.269033
2019-01-11 20:15:00	0	0	0	-2.61	861.98	0.264367
2019-01-11 20:30:00	0	0	0	-3	862.18	0.265767
2019-01-11 20:45:00	0	0	0	-3.77	862.34	0.2681
2019-01-11 21:00:00	0	0	0	-3.99	862.48	0.2688
2019-01-11 21:15:00	0	0	0	-4.27	862.69	0.268333
2019-01-11 21:30:00	0	0	0	-4.42	862.85	0.2569
2019-01-11 21:45:00	0	0	0	-5.07	863.01	0.253633
2019-01-11 22:00:00	0	0	0	-4.76	863.11	0.260167
2019-01-11 22:15:00	0	0	0	-4.22	863.28	0.2569
2019-01-11 22:30:00	0	0	0	-4.73	863.48	0.262033
2019-01-11 22:45:00	0	0	0	-4.59	863.56	0.2646
2019-01-11 23:00:00	0	0	0	-4.52	863.58	0.260633
2019-01-11 23:15:00	0	0	0	-4.65	863.87	0.263433
2019-01-11 23:30:00	0	0	0	-4.97	863.98	0.264833
2019-01-11 23:45:00	0	0	0	-4.76	864.03	0.265767
2019-01-12 00:00:00	0	0	0	-4.88	864.24	0.265533
2019-01-12 00:15:00	0	0	0	-5.08	864.24	0.2625
2019-01-12 00:30:00	0	0	0	-5.01	864.19	0.2618
2019-01-12 00:45:00	0	0	0	-5.08	864.33	0.262033
2019-01-12 01:00:00	0	0	0	-5.23	864.38	0.261567
2019-01-12 01:15:00	0	0	0	-5.51	864.53	0.2618
2019-01-12 01:30:00	0	0	0	-5.45	864.52	0.264367
2019-01-12 01:45:00	0	0	0	-5.65	864.55	0.267167
2019-01-12 02:00:00	0	0	0	-6.03	864.54	0.2653
2019-01-12 02:15:00	0	0	0	-6.7	864.67	0.270433
2019-01-12 02:30:00	0	0	0	-6.54	864.82	0.270667
2019-01-12 02:45:00	0	0	0	-6.79	864.8	0.269033
2019-01-12 03:00:00	0	0	0	-7.28	864.85	0.268333
2019-01-12 03:15:00	0	0	0	-7.96	865	0.2702
2019-01-12 03:30:00	0	0	0	-8.22	865.01	0.2744
2019-01-12 03:45:00	0	0	0	-8.13	865.2	0.274633
2019-01-12 04:00:00	0	0	0	-8.32	865.43	0.274633
2019-01-12 04:15:00	0	0	0	-8.86	865.49	0.275567
2019-01-12 04:30:00	0	0	0	-8.64	865.6	0.279067
2019-01-12 04:45:00	0	0	0	-8.91	865.65	0.269267
2019-01-12 05:00:00	0	0	0	-8.99	865.66	0.267167
2019-01-12 05:15:00	0	0	0	-9.33	865.57	0.273467
2019-01-12 05:30:00	0	0	0	-9.19	865.54	0.275567
2019-01-12 05:45:00	0	0	0	-9.15	865.47	0.2695
2019-01-12 06:00:00	0	0	0	-9.17	865.4	0.273233
2019-01-12 06:15:00	0	0	0	-9.12	865.23	0.2751
2019-01-12 06:30:00	0	0	0	-9	864.97	0.276033
2019-01-12 06:45:00	0	0	0	-8.9	864.75	0.274633
2019-01-12 07:00:00	0	0	0	-9.14	864.61	0.271133
2019-01-12 07:15:00	0	0	0	-9.19	864.71	0.272767
2019-01-12 07:30:00	0	0	0	-9.17	864.89	0.267867
2019-01-12 07:45:00	0	0	0	-9.31	865.12	0.269033
2019-01-12 08:00:00	0	0	0	-9.15	865.33	0.264833
2019-01-12 08:15:00	0	0	0	-8.84	865.46	0.268567
2019-01-12 08:30:00	0	0	0	-8.84	865.73	0.264133
2019-01-12 08:45:00	0	0	0	-8.36	865.9	0.266233
2019-01-12 09:00:00	0	0	0	-8.38	865.91	0.267867
2019-01-12 09:15:00	0	0	0	-8.48	866.05	0.266
2019-01-12 09:30:00	0	0	0	-7.91	866.06	0.268567
2019-01-12 09:45:00	0	0	0	-8.12	866.18	0.2821
2019-01-12 10:00:00	0.04	0.03	0	-8.48	866.29	0.601767
2019-01-12 10:15:00	12	8.66	6.27	-7.78	866.29	2.82893
2019-01-12 10:30:00	28.17	20.33	15.57	-7.35	866.25	5.40283
2019-01-12 10:45:00	42.35	30.56	24.04	-6.5	866.43	8.7801
2019-01-12 11:00:00	80.25	57.9	47.31	-5.58	866.4	10.7394
2019-01-12 11:15:00	84.99	61.32	44.2	-5.47	866.55	12.7141
2019-01-12 11:30:00	89.77	64.77	50.4	-5.39	866.55	13.2347
2019-01-12 11:45:00	104.95	75.72	55.98	-5.33	866.54	18.7724
2019-01-12 12:00:00	117.93	85.09	64.13	-4.99	866.55	16.8327
2019-01-12 12:15:00	146.35	105.59	84.2	-4.87	866.51	18.3706
2019-01-12 12:30:00	133.42	96.26	73.25	-4.7	866.49	26.4042
2019-01-12 12:45:00	253.32	182.77	156.32	-4.45	866.37	42.1734
2019-01-12 13:00:00	376.91	271.94	260.01	-3.25	866.06	67.6769
2019-01-12 13:15:00	355.47	256.47	249.92	-2.38	865.66	63.1388
2019-01-12 13:30:00	301.81	217.75	210.92	-2.11	865.33	56.8384
2019-01-12 13:45:00	298.51	215.38	203.16	-2.3	865.19	55.4827
2019-01-12 14:00:00	252.48	182.16	155.97	-1.76	865.19	49.4758
2019-01-12 14:15:00	354.91	256.07	224.53	-1.14	864.93	50.9605
2019-01-12 14:30:00	344.23	248.36	217.95	-0.98	864.63	50.6368
2019-01-12 14:45:00	278.01	200.58	166.02	-0.64	864.45	40.3396
2019-01-12 15:00:00	273.51	197.34	158.61	-0.59	864.42	37.7004
2019-01-12 15:15:00	265.16	191.31	149.87	-0.28	864.38	33.918
2019-01-12 15:30:00	236.19	170.41	131.06	-0.7	864.17	31.8953
2019-01-12 15:45:00	213.02	153.69	113.2	-0.47	864.18	25.3169
2019-01-12 16:00:00	170.07	122.7	89.67	-0.53	864.16	20.5158
2019-01-12 16:15:00	155.63	112.28	83.02	-0.71	864.27	20.121
2019-01-12 16:30:00	154.73	111.64	85.26	-0.57	864.28	20.0842
2019-01-12 16:45:00	147.63	106.51	82.51	-0.44	864.34	20.5086
2019-01-12 17:00:00	147.37	106.33	78.51	-0.53	864.47	19.3676
2019-01-12 17:15:00	136.33	98.36	71.95	-0.56	864.56	17.1593
2019-01-12 17:30:00	121.67	87.79	63.4	-0.93	864.72	14.1458
2019-01-12 17:45:00	97.35	70.24	51.01	-1.08	864.82	11.2679
2019-01-12 18:00:00	82.39	59.45	42.88	-0.87	865.01	9.09207
2019-01-12 18:15:00	61.85	44.62	31.81	-1.01	865.24	6.52283
2019-01-12 18:30:00	43.87	31.65	22.97	-1.1	865.33	4.50987
2019-01-12 18:45:00	30.64	22.11	15.72	-1.25	865.53	3.10963
2019-01-12 19:00:00	19.76	14.26	9.7	-1.49	865.66	1.75373
2019-01-12 19:15:00	8.63	6.23	4.04	-1.74	865.84	0.5355
2019-01-12 19:30:00	0.21	0.15	0	-2.08	866.06	0.2058
2019-01-12 19:45:00	0	0	0	-2.34	866.35	0.271833
2019-01-12 20:00:00	0	0	0	-2.55	866.55	0.269267
2019-01-12 20:15:00	0	0	0	-3.23	866.82	0.276267
2019-01-12 20:30:00	0	0	0	-4.01	866.97	0.276267
2019-01-12 20:45:00	0	0	0	-4.4	867.17	0.276267
2019-01-12 21:00:00	0	0	0	-4.52	867.33	0.2751
2019-01-12 21:15:00	0	0	0	-4.8	867.51	0.2716
2019-01-12 21:30:00	0	0	0	-4.96	867.64	0.260633
2019-01-12 21:45:00	0	0	0	-4.98	867.69	0.261333
2019-01-12 22:00:00	0	0	0	-5.36	867.77	0.261567
2019-01-12 22:15:00	0	0	0	-5.27	867.7	0.2625
2019-01-12 22:30:00	0	0	0	-5.4	867.71	0.260633
2019-01-12 22:45:00	0	0	0	-5.63	867.74	0.262267
2019-01-12 23:00:00	0	0	0	-5.9	867.83	0.2611
2019-01-12 23:15:00	0	0	0	-5.86	867.83	0.2639
2019-01-12 23:30:00	0	0	0	-6.1	867.9	0.263433
2019-01-12 23:45:00	0	0	0	-6.13	867.94	0.264133
2019-01-13 00:00:00	0	0	0	-6.19	867.95	0.271367
2019-01-13 00:15:00	0	0	0	-6.42	868.02	0.268567
2019-01-13 00:30:00	0	0	0	-6.51	867.95	0.262267
2019-01-13 00:45:00	0	0	0	-6.2	867.94	0.2639
2019-01-13 01:00:00	0	0	0	-5.94	867.97	0.264833
2019-01-13 01:15:00	0	0	0	-6.25	867.96	0.270433
2019-01-13 01:30:00	0	0	0	-6.31	868.05	0.2688
2019-01-13 01:45:00	0	0	0	-6.57	868.15	0.267867
2019-01-13 02:00:00	0	0	0	-6.74	868.08	0.269267
2019-01-13 02:15:00	0	0	0	-6.96	868.14	0.262033
2019-01-13 02:30:00	0	0	0	-6.65	868.05	0.269033
2019-01-13 02:45:00	0	0	0	-6.79	868.05	0.2681
2019-01-13 03:00:00	0	0	0	-6.55	868.04	0.268333
2019-01-13 03:15:00	0	0	0	-6.54	868.08	0.272533
2019-01-13 03:30:00	0	0	0	-6.5	868.02	0.2695
2019-01-13 03:45:00	0	0	0	-6.6	868.03	0.273233
2019-01-13 04:00:00	0	0	0	-6.65	868.15	0.274167
2019-01-13 04:15:00	0	0	0	-7.22	868.28	0.270667
2019-01-13 04:30:00	0	0	0	-7.05	868.4	0.278833
2019-01-13 04:45:00	0	0	0	-7.25	868.39	0.272767
2019-01-13 05:00:00	0	0	0	-7.28	868.45	0.273
2019-01-13 05:15:00	0	0	0	-7.27	868.47	0.275567
2019-01-13 05:30:00	0	0	0	-7.33	868.49	0.269967
2019-01-13 05:45:00	0	0	0	-6.92	868.45	0.276733
2019-01-13 06:00:00	0	0	0	-7.63	868.34	0.272767
2019-01-13 06:15:00	0	0	0	-7.39	868.19	0.2772
2019-01-13 06:30:00	0	0	0	-7.59	868.17	0.274167
2019-01-13 06:45:00	0	0	0	-7.46	868.25	0.2751
2019-01-13 07:00:00	0	0	0	-7.51	868.16	0.274167
2019-01-13 07:15:00	0	0	0	-7.58	868.13	0.2723
2019-01-13 07:30:00	0	0	0	-7.68	868.11	0.271133
2019-01-13 07:45:00	0	0	0	-7.59	868.18	0.269733
2019-01-13 08:00:00	0	0	0	-7.58	868.24	0.267867
2019-01-13 08:15:00	0	0	0	-6.96	868.33	0.2681
2019-01-13 08:30:00	0	0	0	-7.26	868.57	0.267633
2019-01-13 08:45:00	0	0	0	-7.12	868.63	0.266
2019-01-13 09:00:00	0	0	0	-7.17	868.78	0.267867
2019-01-13 09:15:00	0	0	0	-7.2	868.9	0.2681
2019-01-13 09:30:00	0	0	0	-7.19	868.97	0.264833
2019-01-13 09:45:00	0	0	0	-7.17	869.05	0.2793
2019-01-13 10:00:00	0	0	0	-7.1	869.19	0.246167
2019-01-13 10:15:00	2.07	1.5	0.55	-7.12	869.35	0.5509
2019-01-13 10:30:00	9.4	6.78	4.48	-7.13	869.56	1.66623
2019-01-13 10:45:00	18.71	13.5	9.34	-6.98	869.72	2.50437
2019-01-13 11:00:00	24.65	17.78	12.48	-6.59	869.97	3.50443
2019-01-13 11:15:00	31.89	23.01	16.47	-6.4	870.12	4.13233
2019-01-13 11:30:00	34.3	24.75	17.67	-6.34	870.26	5.74233
2019-01-13 11:45:00	57.33	41.36	29.28	-6.13	870.44	7.9366
2019-01-13 12:00:00	77.2	55.7	40.35	-5.82	870.47	10.4258
2019-01-13 12:15:00	87.37	63.04	45.32	-5.69	870.69	11.218
2019-01-13 12:30:00	92.46	66.71	47.81	-6.06	870.67	12.9733
2019-01-13 12:45:00	115.53	83.36	59.87	-5.72	870.89	16.1896
2019-01-13 13:00:00	135.71	97.91	71.54	-5.55	870.92	19.212
2019-01-13 13:15:00	153.59	110.82	81.66	-5.36	870.82	21.9009
2019-01-13 13:30:00	167.3	120.71	89.46	-5.08	870.79	26.3993
2019-01-13 13:45:00	208.25	150.25	113.46	-4.97	870.54	25.8722
2019-01-13 14:00:00	187.84	135.53	101.33	-4.77	870.49	35.7695
2019-01-13 14:15:00	365.3	263.56	225.28	-4.12	870.3	63.7303
2019-01-13 14:30:00	362.15	261.29	234.62	-3.07	870.01	47.8994
2019-01-13 14:45:00	272.71	196.76	180.76	-3.2	869.71	69.6213
2019-01-13 15:00:00	510.02	367.98	363.4	-2.4	869.63	89.6485
2019-01-13 15:15:00	421.71	304.26	295.39	-1.59	869.64	73.0557
2019-01-13 15:30:00	376.66	271.76	252.08	-1.63	869.53	37.7295
2019-01-13 15:45:00	228.26	164.69	128.94	-1.81	869.61	37.5786
2019-01-13 16:00:00	200.45	144.63	109.31	-1.52	869.76	21.0194
2019-01-13 16:15:00	128.63	92.81	68.62	-1.55	869.92	15.8919
2019-01-13 16:30:00	115.24	83.15	60.08	-1.63	870.08	16.0631
2019-01-13 16:45:00	128.99	93.06	67.09	-1.62	870.3	15.6728
2019-01-13 17:00:00	101.43	73.18	53.16	-1.85	870.43	12.0638
2019-01-13 17:15:00	90.25	65.12	46.78	-1.91	870.61	11.7108
2019-01-13 17:30:00	92.31	66.6	48.02	-2.06	870.75	11.2033
2019-01-13 17:45:00	81.72	58.96	42.35	-2.13	870.95	9.7734
2019-01-13 18:00:00	74.13	53.48	38.51	-2.27	871.06	8.85383
2019-01-13 18:15:00	64.98	46.88	33.04	-2.22	871.16	7.2359
2019-01-13 18:30:00	47.77	34.46	24.82	-2.34	871.25	5.0057
2019-01-13 18:45:00	36.52	26.35	18.83	-2.29	871.28	4.03643
2019-01-13 19:00:00	29.31	21.15	14.55	-2.36	871.4	2.79323
2019-01-13 19:15:00	14.27	10.29	6.97	-2.46	871.46	0.815267
2019-01-13 19:30:00	1.63	1.18	0.45	-2.6	871.61	0.195067
2019-01-13 19:45:00	0	0	0	-2.72	871.8	0.273233
2019-01-13 20:00:00	0	0	0	-2.82	871.96	0.272067
2019-01-13 20:15:00	0	0	0	-2.99	872.11	0.272067
2019-01-13 20:30:00	0	0	0	-3.25	872.18	0.2702
2019-01-13 20:45:00	0	0	0	-3.31	872.34	0.2737
2019-01-13 21:00:00	0	0	0	-3.61	872.45	0.272767
2019-01-13 21:15:00	0	0	0	-3.78	872.69	0.2709
2019-01-13 21:30:00	0	0	0	-4.27	872.86	0.262967
2019-01-13 21:45:00	0	0	0	-4.54	872.93	0.261333
2019-01-13 22:00:00	0	0	0	-4.49	873.06	0.2611
2019-01-13 22:15:00	0	0	0	-4.78	873.13	0.261333
2019-01-13 22:30:00	0	0	0	-5.27	873.19	0.257133
2019-01-13 22:45:00	0	0	0	-5.28	873.22	0.2632
2019-01-13 23:00:00	0	0	0	-5.4	873.23	0.2618
2019-01-13 23:15:00	0	0	0	-5.74	873.27	0.265067
2019-01-13 23:30:00	0	0	0	-6.04	873.34	0.264833
2019-01-13 23:45:00	0	0	0	-6.01	873.29	0.263433
2019-01-14 00:00:00	0	0	0	-5.6	873.35	0.266233
2019-01-14 00:15:00	0	0	0	-6.17	873.36	0.266467
2019-01-14 00:30:00	0	0	0	-5.63	873.28	0.266233
2019-01-14 00:45:00	0	0	0	-5.51	873.24	0.2688
2019-01-14 01:00:00	0	0	0	-6.38	873.3	0.265533
2019-01-14 01:15:00	0	0	0	-7.01	873.32	0.266
2019-01-14 01:30:00	0	0	0	-7.33	873.38	0.2646
2019-01-14 01:45:00	0	0	0	-7.35	873.47	0.263433
2019-01-14 02:00:00	0	0	0	-7.64	873.42	0.267633
2019-01-14 02:15:00	0	0	0	-7.64	873.4	0.273233
2019-01-14 02:30:00	0	0	0	-7.42	873.44	0.276967
2019-01-14 02:45:00	0	0	0	-7.7	873.42	0.2737
2019-01-14 03:00:00	0	0	0	-7.98	873.47	0.2674
2019-01-14 03:15:00	0	0	0	-8.44	873.62	0.267633
2019-01-14 03:30:00	0	0	0	-8.76	873.54	0.2737
2019-01-14 03:45:00	0	0	0	-7.58	873.69	0.272767
2019-01-14 04:00:00	0	0	0	-8.1	873.55	0.279067
2019-01-14 04:15:00	0	0	0	-7.58	873.53	0.265767
2019-01-14 04:30:00	0	0	0	-6.14	873.61	0.2716
2019-01-14 04:45:00	0	0	0	-7.1	873.6	0.275567
2019-01-14 05:00:00	0	0	0	-8.07	873.75	0.273233
2019-01-14 05:15:00	0	0	0	-7.64	873.8	0.2765
2019-01-14 05:30:00	0	0	0	-7.27	873.78	0.275567
2019-01-14 05:45:00	0	0	0	-7.44	873.88	0.273933
2019-01-14 06:00:00	0	0	0	-8.78	873.75	0.269733
2019-01-14 06:15:00	0	0	0	-8.08	873.62	0.276033
2019-01-14 06:30:00	0	0	0	-8.16	873.57	0.2751
2019-01-14 06:45:00	0	0	0	-7.54	873.53	0.2716
2019-01-14 07:00:00	0	0	0	-7.76	873.37	0.2723
2019-01-14 07:15:00	0	0	0	-7.65	873.35	0.269033
2019-01-14 07:30:00	0	0	0	-7.63	873.32	0.267867
2019-01-14 07:45:00	0	0	0	-6.61	873.42	0.269733
2019-01-14 08:00:00	0	0	0	-5.19	873.3	0.270667
2019-01-14 08:15:00	0	0	0	-6.26	873.12	0.269967
2019-01-14 08:30:00	0	0	0	-6.16	873.31	0.269033
2019-01-14 08:45:00	0	0	0	-7.07	873.34	0.2653
2019-01-14 09:00:00	0	0	0	-8.14	873.4	0.266933
2019-01-14 09:15:00	0	0	0	-7.71	873.53	0.269733
2019-01-14 09:30:00	0	0	0	-8.57	873.54	0.276733
2019-01-14 09:45:00	0	0	0	-9.19	873.61	0.284667
2019-01-14 10:00:00	0	0	0	-8.22	873.46	0.6209
2019-01-14 10:15:00	15.6	11.26	12.77	-8.67	873.51	2.63223
2019-01-14 10:30:00	43.47	31.37	33.98	-8.49	873.4	4.93103
2019-01-14 10:45:00	79.62	57.45	69.71	-6.48	873.09	7.8505
2019-01-14 11:00:00	118.53	85.52	105.97	-5.57	872.69	16.2528
2019-01-14 11:15:00	163.73	118.13	137.9	-3.03	872.33	35.4044
2019-01-14 11:30:00	209.16	150.91	168.13	-3.14	872.05	54.8907
2019-01-14 11:45:00	250.51	180.74	195.79	-2.69	871.99	65.0697
2019-01-14 12:00:00	292.43	210.99	222.12	-3.42	871.96	72.7897
2019-01-14 12:15:00	326.37	235.47	249.16	-5.3	871.96	78.7414
2019-01-14 12:30:00	171.9	124.03	163.87	-5.16	871.96	84.0644
2019-01-14 12:45:00	382.57	276.02	195.24	-4.69	872.13	88.0728
2019-01-14 13:00:00	405.8	292.78	319.79	-3.97	872.28	92.5178
2019-01-14 13:15:00	423.13	305.29	335.72	-3.28	872.32	95.5183
2019-01-14 13:30:00	440.87	318.09	349.97	-2.76	872.25	96.8021
2019-01-14 13:45:00	458.03	330.47	360.06	-2.19	872.28	95.3685
2019-01-14 14:00:00	450.23	324.84	348.8	-1.58	872.06	92.6662
2019-01-14 14:15:00	470.68	339.6	364.38	-0.91	871.55	87.4932
2019-01-14 14:30:00	477.34	344.4	371.42	-0.47	871	87.5112
2019-01-14 14:45:00	482.96	348.46	376.77	0.22	870.71	87.5061
2019-01-14 15:00:00	480.09	346.39	376.43	0.84	870.52	87.5488
2019-01-14 15:15:00	478.23	345.05	374.08	0.89	870.22	89.6887
2019-01-14 15:30:00	465.15	335.61	361.45	1.11	870.07	89.6446
2019-01-14 15:45:00	450.86	325.3	351.39	0.69	869.93	89.4185
2019-01-14 16:00:00	440.67	317.94	344.3	0.42	869.69	87.6465
2019-01-14 16:15:00	424.93	306.58	330.75	1.93	869.57	84.0807
2019-01-14 16:30:00	400.4	288.89	308.76	2.1	869.45	79.5583
2019-01-14 16:45:00	374.85	270.46	287.36	1.77	869.4	74.3661
2019-01-14 17:00:00	347.73	250.89	263.55	1.95	869.29	68.9017
2019-01-14 17:15:00	315.63	227.73	236.08	2.64	869.11	62.353
2019-01-14 17:30:00	281.99	203.45	207.76	2.26	869.07	55.6535
2019-01-14 17:45:00	251.89	181.74	183.25	2.52	868.92	48.1885
2019-01-14 18:00:00	216.21	156	156.43	3.11	868.77	39.1963
2019-01-14 18:15:00	177.44	128.02	128.37	3.06	868.86	24.7242
2019-01-14 18:30:00	135.02	97.42	96.03	2.41	868.77	12.2115
2019-01-14 18:45:00	98.67	71.19	69.84	2.15	868.7	6.70857
2019-01-14 19:00:00	63.49	45.81	44.4	1.71	868.7	5.201
2019-01-14 19:15:00	32.19	23.23	21.28	0.88	868.98	2.45233
2019-01-14 19:30:00	7.6	5.48	4.45	-0.15	869.15	0.3066
2019-01-14 19:45:00	0	0	0	-0.89	869.43	0.259233
2019-01-14 20:00:00	0	0	0	-1.57	869.54	0.257367
2019-01-14 20:15:00	0	0	0	-1.96	869.65	0.258067
2019-01-14 20:30:00	0	0	0	-2.33	869.75	0.262967
2019-01-14 20:45:00	0	0	0	-2.72	869.88	0.264833
2019-01-14 21:00:00	0	0	0	-3.77	869.98	0.266233
2019-01-14 21:15:00	0	0	0	-2.89	869.97	0.2695
2019-01-14 21:30:00	0	0	0	-3.26	869.9	0.2541
2019-01-14 21:45:00	0	0	0	-3.6	869.84	0.2499
2019-01-14 22:00:00	0	0	0	-3.54	869.84	0.252933
2019-01-14 22:15:00	0	0	0	-3.72	869.79	0.256433
2019-01-14 22:30:00	0	0	0	-4.23	869.7	0.2597
2019-01-14 22:45:00	0	0	0	-4.63	869.62	0.255733
2019-01-14 23:00:00	0	0	0	-4.52	869.74	0.255967
2019-01-14 23:15:00	0	0	0	-5	869.65	0.2534
2019-01-14 23:30:00	0	0	0	-5.65	869.68	0.2569
2019-01-14 23:45:00	0	0	0	-5.76	869.7	0.261567
2019-01-15 00:00:00	0	0	0	-5.84	869.83	0.264133
2019-01-15 00:15:00	0	0	0	-5.69	869.86	0.2604
2019-01-15 00:30:00	0	0	0	-6.14	870.04	0.2611
2019-01-15 00:45:00	0	0	0	-6.7	870.27	0.2618
2019-01-15 01:00:00	0	0	0	-6.33	870.51	0.262967
2019-01-15 01:15:00	0	0	0	-6.81	870.84	0.262967
2019-01-15 01:30:00	0	0	0	-6.84	871.01	0.2667
2019-01-15 01:45:00	0	0	0	-6.5	870.78	0.268333
2019-01-15 02:00:00	0	0	0	-6.67	870.56	0.263433
2019-01-15 02:15:00	0	0	0	-7.06	870.51	0.2688
2019-01-15 02:30:00	0	0	0	-7.66	870.35	0.2674
2019-01-15 02:45:00	0	0	0	-8.04	870.26	0.264133
2019-01-15 03:00:00	0	0	0	-8.77	869.92	0.263667
2019-01-15 03:15:00	0	0	0	-9.5	869.67	0.273
2019-01-15 03:30:00	0	0	0	-9.28	869.41	0.271833
2019-01-15 03:45:00	0	0	0	-9.3	869.55	0.268567
2019-01-15 04:00:00	0	0	0	-9.54	869.63	0.273
2019-01-15 04:15:00	0	0	0	-9.71	869.51	0.268567
2019-01-15 04:30:00	0	0	0	-9.62	869.59	0.272067
2019-01-15 04:45:00	0	0	0	-9.59	870.09	0.269033
2019-01-15 05:00:00	0	0	0	-9.62	870.38	0.275567
2019-01-15 05:15:00	0	0	0	-9.53	870.29	0.269267
2019-01-15 05:30:00	0	0	0	-10.14	870.14	0.276967
2019-01-15 05:45:00	0	0	0	-10.23	869.75	0.272067
2019-01-15 06:00:00	0	0	0	-9.98	869.51	0.2751
2019-01-15 06:15:00	0	0	0	-9.8	868.95	0.268333
2019-01-15 06:30:00	0	0	0	-10	868.68	0.273233
2019-01-15 06:45:00	0	0	0	-10.1	868.54	0.270667
2019-01-15 07:00:00	0	0	0	-9.26	868.2	0.2653
2019-01-15 07:15:00	0	0	0	-8.15	867.95	0.268333
2019-01-15 07:30:00	0	0	0	-8.82	867.63	0.2681
2019-01-15 07:45:00	0	0	0	-9.35	867.71	0.264367
2019-01-15 08:00:00	0	0	0	-9.9	867.96	0.268567
2019-01-15 08:15:00	0	0	0	-9.84	867.81	0.2695
2019-01-15 08:30:00	0	0	0	-9.89	867.73	0.267867
2019-01-15 08:45:00	0	0	0	-9.91	867.78	0.262033
2019-01-15 09:00:00	0	0	0	-10.06	868.19	0.269267
2019-01-15 09:15:00	0	0	0	-9.63	868.39	0.266467
2019-01-15 09:30:00	0	0	0	-9.36	868.62	0.273233
2019-01-15 09:45:00	0	0	0	-8.66	868.5	0.293533
2019-01-15 10:00:00	0	0	0	-9.34	868.44	0.2555
2019-01-15 10:15:00	6.64	4.79	2.94	-11.56	868.45	1.7619
2019-01-15 10:30:00	23.19	16.73	12.36	-11.35	868.4	4.12977
2019-01-15 10:45:00	42.05	30.34	23.51	-10.95	868.37	8.1277
2019-01-15 11:00:00	69.57	50.2	40.11	-9.64	868.32	13.5035
2019-01-15 11:15:00	105.3	75.97	65.77	-8	868.44	19.4136
2019-01-15 11:30:00	141.11	101.81	91.71	-6.81	868.49	28.1857
2019-01-15 11:45:00	174.65	126.01	110.68	-6.3	868.63	32.9112
2019-01-15 12:00:00	188.27	135.83	113.32	-6.35	868.58	32.7656
2019-01-15 12:15:00	206.33	148.86	123.77	-6.47	868.76	29.2504
2019-01-15 12:30:00	191.95	138.49	110.39	-6.23	868.92	33.8032
2019-01-15 12:45:00	206.79	149.2	114.17	-6.11	869.05	28.9492
2019-01-15 13:00:00	234.87	169.46	142.82	-6.34	869.14	37.1961
2019-01-15 13:15:00	204.47	147.52	133.49	-5.92	868.78	52.8724
2019-01-15 13:30:00	298.43	215.31	208.57	-5.11	868.47	68.1576
2019-01-15 13:45:00	330.2	238.24	237.96	-4.61	867.99	78.5335
2019-01-15 14:00:00	427.47	308.42	315.77	-3.84	867.5	83.5053
2019-01-15 14:15:00	455.77	328.84	344.95	-3.09	866.92	93.446
2019-01-15 14:30:00	477.24	344.33	364.09	-2.49	866.41	87.4977
2019-01-15 14:45:00	447.34	322.76	341.78	-2.44	866.21	84.6263
2019-01-15 15:00:00	447.93	323.18	344.36	-2.58	866.12	85.3022
2019-01-15 15:15:00	475.04	342.74	367.83	-1.62	865.77	84.8423
2019-01-15 15:30:00	477.54	344.55	363.49	-0.95	865.42	72.4157
2019-01-15 15:45:00	337.68	243.64	235.28	-1.02	865.05	70.3477
2019-01-15 16:00:00	508.45	366.84	359.17	-0.14	864.8	49.0684
2019-01-15 16:15:00	252.41	182.12	147.65	-1.02	864.69	45.1472
2019-01-15 16:30:00	376.61	271.72	239.02	-0.69	864.61	55.7746
2019-01-15 16:45:00	260.48	187.94	158.52	-0.05	864.68	26.1798
2019-01-15 17:00:00	162.17	117	85.67	-1.13	864.76	22.0236
2019-01-15 17:15:00	155.79	112.4	83.64	-0.86	864.52	31.5453
2019-01-15 17:30:00	238.97	172.41	151.04	-0.58	864.31	40.351
2019-01-15 17:45:00	291.31	210.18	197.77	-0.9	864.6	46.7518
2019-01-15 18:00:00	168.44	121.53	108.5	-0.29	864.52	17.3831
2019-01-15 18:15:00	108.23	78.09	64.74	-0.89	864.49	13.1719
2019-01-15 18:30:00	92.98	67.09	49.32	-1.08	864.64	10.2643
2019-01-15 18:45:00	58.2	41.99	32.47	-1.48	864.64	5.98127
2019-01-15 19:00:00	37.29	26.91	20.76	-1.47	864.53	2.8581
2019-01-15 19:15:00	18.56	13.39	9.63	-1.96	864.84	1.62307
2019-01-15 19:30:00	8.43	6.08	4.1	-2.48	864.91	0.462933
2019-01-15 19:45:00	0	0	0	-2.81	865.16	0.298433
2019-01-15 20:00:00	0	0	0	-3.19	865.65	0.2681
2019-01-15 20:15:00	0	0	0	-3.28	865.58	0.2674
2019-01-15 20:30:00	0	0	0	-3.42	865.26	0.2723
2019-01-15 20:45:00	0	0	0	-3.74	865.46	0.273
2019-01-15 21:00:00	0	0	0	-4.03	865.68	0.2688
2019-01-15 21:15:00	0	0	0	-3.79	865.57	0.263433
2019-01-15 21:30:00	0	0	0	-4	865.67	0.2583
2019-01-15 21:45:00	0	0	0	-4.18	865.85	0.259933
2019-01-15 22:00:00	0	0	0	-4.41	865.58	0.259
2019-01-15 22:15:00	0	0	0	-4.61	864.99	0.260167
2019-01-15 22:30:00	0	0	0	-5.02	864.6	0.263667
2019-01-15 22:45:00	0	0	0	-5.58	864.7	0.2632
2019-01-15 23:00:00	0	0	0	-5.98	865.02	0.267167
2019-01-15 23:15:00	0	0	0	-5.99	864.89	0.265533
2019-01-15 23:30:00	0	0	0	-6.66	864.78	0.266933
2019-01-15 23:45:00	0	0	0	-6.41	865.22	0.269267
2019-01-16 00:00:00	0	0	0	-7.19	865.46	0.264367
2019-01-16 00:15:00	0	0	0	-7.23	865.61	0.262033
2019-01-16 00:30:00	0	0	0	-7.03	866.06	0.262267
2019-01-16 00:45:00	0	0	0	-7.24	865.8	0.2611
2019-01-16 01:00:00	0	0	0	-6.93	865.81	0.259467
2019-01-16 01:15:00	0	0	0	-6.74	865.63	0.264133
2019-01-16 01:30:00	0	0	0	-6.93	865.42	0.263667
2019-01-16 01:45:00	0	0	0	-6.53	865.13	0.2646
2019-01-16 02:00:00	0	0	0	-6.59	864.97	0.266233
2019-01-16 02:15:00	0	0	0	-6.56	864.86	0.2653
2019-01-16 02:30:00	0	0	0	-7.03	864.89	0.271833
2019-01-16 02:45:00	0	0	0	-7.87	864.7	0.268567
2019-01-16 03:00:00	0	0	0	-8.14	864.83	0.2688
2019-01-16 03:15:00	0	0	0	-8.52	864.95	0.267633
2019-01-16 03:30:00	0	0	0	-8.75	865.09	0.269733
2019-01-16 03:45:00	0	0	0	-9.33	865.15	0.273
2019-01-16 04:00:00	0	0	0	-9.03	865.2	0.269967
2019-01-16 04:15:00	0	0	0	-8.73	864.96	0.272767
2019-01-16 04:30:00	0	0	0	-8.74	865.09	0.2716
2019-01-16 04:45:00	0	0	0	-8.88	865.14	0.2702
2019-01-16 05:00:00	0	0	0	-8.77	865.42	0.272067
2019-01-16 05:15:00	0	0	0	-9.02	865.29	0.2793
2019-01-16 05:30:00	0	0	0	-9.18	865.31	0.270667
2019-01-16 05:45:00	0	0	0	-9.32	865.12	0.272533
2019-01-16 06:00:00	0	0	0	-9.02	864.95	0.271367
2019-01-16 06:15:00	0	0	0	-9.19	864.68	0.270667
2019-01-16 06:30:00	0	0	0	-9.41	864.55	0.273933
2019-01-16 06:45:00	0	0	0	-9.69	864.51	0.2716
2019-01-16 07:00:00	0	0	0	-9.84	864.59	0.271833
2019-01-16 07:15:00	0	0	0	-10.03	864.62	0.270433
2019-01-16 07:30:00	0	0	0	-9.6	864.6	0.271133
2019-01-16 07:45:00	0	0	0	-9.59	864.71	0.265767
2019-01-16 08:00:00	0	0	0	-9.6	864.67	0.268333
2019-01-16 08:15:00	0	0	0	-9.87	864.7	0.2688
2019-01-16 08:30:00	0	0	0	-9.78	864.58	0.265533
2019-01-16 08:45:00	0	0	0	-9.7	864.87	0.265067
2019-01-16 09:00:00	0	0	0	-10.02	864.88	0.2688
2019-01-16 09:15:00	0	0	0	-10.08	865.24	0.264833
2019-01-16 09:30:00	0	0	0	-9.94	865.45	0.268567
2019-01-16 09:45:00	0	0	0	-9.7	865.43	0.2772
2019-01-16 10:00:00	0	0	0	-9.82	865.24	0.3171
2019-01-16 10:15:00	5.53	3.99	2.5	-9.51	865.45	1.27073
2019-01-16 10:30:00	17.95	12.95	9.27	-9.13	865.76	2.8126
2019-01-16 10:45:00	25.46	18.37	13.18	-8.36	866.3	3.59777
2019-01-16 11:00:00	33.34	24.05	17.08	-7.42	866.54	4.46367
2019-01-16 11:15:00	40.21	29.01	20.78	-7.07	866.55	5.59487
2019-01-16 11:30:00	49.58	35.77	25.38	-6.58	866.58	6.84133
2019-01-16 11:45:00	58.85	42.46	30.09	-6.17	866.7	7.81573
2019-01-16 12:00:00	61.9	44.66	31.5	-5.72	866.54	7.76907
2019-01-16 12:15:00	58.44	42.16	30.75	-5.52	866.35	8.24203
2019-01-16 12:30:00	77.09	55.62	40.54	-5.35	866.14	16.5471
2019-01-16 12:45:00	169.12	122.02	90.44	-4.85	866.12	24.6106
2019-01-16 13:00:00	142.24	102.63	72.54	-4.77	865.97	16.3784
2019-01-16 13:15:00	122.03	88.05	66.8	-4.65	865.48	17.9156
2019-01-16 13:30:00	143	103.17	79.92	-4.45	865.24	15.8184
2019-01-16 13:45:00	108	77.92	62.5	-4.51	864.83	14.8034
2019-01-16 14:00:00	130.65	94.26	74.93	-4.3	864.64	29.8373
2019-01-16 14:15:00	365.3	263.56	240.07	-3.25	864.38	35.7448
2019-01-16 14:30:00	206.45	148.96	134.27	-2.8	863.63	40.2262
2019-01-16 14:45:00	371.54	268.06	278.41	-1.93	863.67	42.9534
2019-01-16 15:00:00	475.07	342.77	362.83	-1.32	862.88	45.2886
2019-01-16 15:15:00	445.37	321.33	335.18	-1.13	862.15	45.2188
2019-01-16 15:30:00	439.74	317.27	330.43	-0.94	862.01	45.1957
2019-01-16 15:45:00	420.37	303.29	315.54	-0.47	862.06	45.0639
2019-01-16 16:00:00	397.29	286.64	294.19	-0.26	861.63	45.1099
2019-01-16 16:15:00	385.37	278.05	279.09	-0.37	861.39	42.3236
2019-01-16 16:30:00	241.59	174.3	163.67	-0.08	861.08	33.4906
2019-01-16 16:45:00	283.13	204.28	188.95	-0.09	861.14	28.8965
2019-01-16 17:00:00	192.09	138.6	121.21	-0.09	861.1	26.519
2019-01-16 17:15:00	160.98	116.15	91.31	-0.5	861.25	19.8035
2019-01-16 17:30:00	152.78	110.23	84.63	-0.49	861.35	18.5621
2019-01-16 17:45:00	123.29	88.96	66.54	-0.53	861.51	14.4471
2019-01-16 18:00:00	96.39	69.54	50.88	-0.79	861.58	10.3416
2019-01-16 18:15:00	72.16	52.06	37.92	-1.22	861.68	8.0829
2019-01-16 18:30:00	62.88	45.37	32.25	-1.27	861.84	7.3465
2019-01-16 18:45:00	52.94	38.2	27.08	-1.37	861.97	5.32467
2019-01-16 19:00:00	32.47	23.43	16.66	-1.43	861.97	2.4997
2019-01-16 19:15:00	14.46	10.43	7.16	-1.78	861.92	0.755767
2019-01-16 19:30:00	1.57	1.13	0.36	-2.03	861.95	0.195533
2019-01-16 19:45:00	0	0	0	-2.27	862.28	0.273233
2019-01-16 20:00:00	0	0	0	-2.42	862.34	0.276033
2019-01-16 20:15:00	0	0	0	-2.58	862.39	0.275567
2019-01-16 20:30:00	0	0	0	-2.82	862.59	0.276967
2019-01-16 20:45:00	0	0	0	-3.25	862.94	0.273233
2019-01-16 21:00:00	0	0	0	-3.62	863.18	0.279533
2019-01-16 21:15:00	0	0	0	-3.73	863.47	0.269733
2019-01-16 21:30:00	0	0	0	-3.68	863.8	0.262033
2019-01-16 21:45:00	0	0	0	-3.63	863.94	0.262267
2019-01-16 22:00:00	0	0	0	-3.8	863.96	0.260633
2019-01-16 22:15:00	0	0	0	-3.52	864.1	0.262033
2019-01-16 22:30:00	0	0	0	-3.57	864.32	0.267167
2019-01-16 22:45:00	0	0	0	-3.66	864.57	0.2604
2019-01-16 23:00:00	0	0	0	-3.95	864.64	0.2688
2019-01-16 23:15:00	0	0	0	-3.89	864.73	0.2667
2019-01-16 23:30:00	0	0	0	-4.07	864.97	0.263433
2019-01-16 23:45:00	0	0	0	-4.01	865.26	0.268333
2019-01-17 00:00:00	0	0	0	-3.93	865.4	0.2681
2019-01-17 00:15:00	0	0	0	-3.97	865.37	0.2618
2019-01-17 00:30:00	0	0	0	-4.05	865.34	0.262033
2019-01-17 00:45:00	0	0	0	-4.1	865.41	0.264367
2019-01-17 01:00:00	0	0	0	-4.04	865.5	0.266933
2019-01-17 01:15:00	0	0	0	-4.01	865.51	0.265767
2019-01-17 01:30:00	0	0	0	-4.06	865.6	0.264833
2019-01-17 01:45:00	0	0	0	-4.07	865.73	0.266
2019-01-17 02:00:00	0	0	0	-4.43	865.71	0.268333
2019-01-17 02:15:00	0	0	0	-5.43	865.54	0.262967
2019-01-17 02:30:00	0	0	0	-5.75	865.52	0.273933
2019-01-17 02:45:00	0	0	0	-5.92	865.59	0.269733
2019-01-17 03:00:00	0	0	0	-6.18	865.45	0.2723
2019-01-17 03:15:00	0	0	0	-6.22	865.39	0.270667
2019-01-17 03:30:00	0	0	0	-6.33	865.47	0.269033
2019-01-17 03:45:00	0	0	0	-6.27	865.45	0.273233
2019-01-17 04:00:00	0	0	0	-6.2	865.42	0.273933
2019-01-17 04:15:00	0	0	0	-5.98	865.34	0.266933
2019-01-17 04:30:00	0	0	0	-5.64	865.23	0.270433
2019-01-17 04:45:00	0	0	0	-5.34	865.24	0.268333
2019-01-17 05:00:00	0	0	0	-5.17	865.04	0.268333
2019-01-17 05:15:00	0	0	0	-5.09	864.86	0.2716
2019-01-17 05:30:00	0	0	0	-4.92	864.68	0.266933
2019-01-17 05:45:00	0	0	0	-4.75	864.53	0.273233
2019-01-17 06:00:00	0	0	0	-4.71	864.4	0.268567
2019-01-17 06:15:00	0	0	0	-5.02	864.31	0.263667
2019-01-17 06:30:00	0	0	0	-4.9	864.3	0.266233
2019-01-17 06:45:00	0	0	0	-4.8	864.26	0.269967
2019-01-17 07:00:00	0	0	0	-4.65	864.23	0.263667
2019-01-17 07:15:00	0	0	0	-4.49	864.14	0.262733
2019-01-17 07:30:00	0	0	0	-4.2	864.08	0.261567
2019-01-17 07:45:00	0	0	0	-3.98	864.14	0.2667
2019-01-17 08:00:00	0	0	0	-3.8	864.11	0.266233
2019-01-17 08:15:00	0	0	0	-3.81	864.27	0.2653
2019-01-17 08:30:00	0	0	0	-3.44	864.01	0.2688
2019-01-17 08:45:00	0	0	0	-2.76	863.79	0.258533
2019-01-17 09:00:00	0	0	0	1.83	863.25	0.2653
2019-01-17 09:15:00	0	0	0	2.19	862.96	0.262967
2019-01-17 09:30:00	0	0	0	2.29	862.87	0.258767
2019-01-17 09:45:00	0	0	0	1.73	863.72	0.281867
2019-01-17 10:00:00	0	0	0	-0.89	863.87	0.255733
2019-01-17 10:15:00	9.03	6.51	2.49	-2.95	864.22	0.077467
2019-01-17 10:30:00	20.23	14.59	10.82	-3.93	864.42	0.464333
2019-01-17 10:45:00	36.77	26.53	19.69	-3.86	864.62	1.33047
2019-01-17 11:00:00	52.54	37.91	27.75	-3.78	864.55	1.81627
2019-01-17 11:15:00	86.55	62.45	48.37	-3.5	864.56	4.11717
2019-01-17 11:30:00	123.93	89.41	67.91	-3.28	865.23	4.02523
2019-01-17 11:45:00	104.53	75.42	56.17	-3.58	865.62	4.21773
2019-01-17 12:00:00	148.22	106.94	80.36	-3.26	865.7	6.34713
2019-01-17 12:15:00	175.89	126.9	95.57	-2.75	865.68	7.9114
2019-01-17 12:30:00	194.11	140.05	105.64	-2.43	865.57	8.9579
2019-01-17 12:45:00	191.21	137.96	104.89	-1.96	865.53	10.8131
2019-01-17 13:00:00	196.19	141.55	112.4	-1.87	865.54	19.1049
2019-01-17 13:15:00	284.93	205.57	190.9	-1.06	865.49	40.6709
2019-01-17 13:30:00	375.49	270.92	260.42	-1.08	865.41	51.4225
2019-01-17 13:45:00	296.54	213.95	173.02	-0.7	865.36	29.8998
2019-01-17 14:00:00	212.92	153.62	113.18	-1.38	865.45	34.8509
2019-01-17 14:15:00	262.22	189.19	140.45	-1.31	865.44	42.8433
2019-01-17 14:30:00	306.38	221.05	164.01	-1	865.35	47.9969
2019-01-17 14:45:00	334.31	241.21	178.48	-0.79	865.29	48.6593
2019-01-17 15:00:00	310.39	223.95	164.99	-0.2	865.14	41.401
2019-01-17 15:15:00	284.09	204.97	150.86	-0.43	865	42.2128
2019-01-17 15:30:00	311.41	224.68	165.87	-0.05	864.77	37.853
2019-01-17 15:45:00	370.26	267.14	200.63	0.14	864.7	36.5302
2019-01-17 16:00:00	239.62	172.89	125.68	-0.48	864.77	26.0097
2019-01-17 16:15:00	138.36	99.83	72	-0.78	864.62	16.6448
2019-01-17 16:30:00	105.28	75.96	54.72	-1.02	864.6	11.8687
2019-01-17 16:45:00	60.97	43.99	31.37	-1.15	864.66	10.1465
2019-01-17 17:00:00	139.62	100.74	72.97	-1.22	864.84	15.1268
2019-01-17 17:15:00	85	61.33	44.22	-1.29	864.84	15.0213
2019-01-17 17:30:00	138.95	100.25	72.47	-1.22	864.83	14.4013
2019-01-17 17:45:00	75.4	54.4	39.25	-1.31	864.77	6.56927
2019-01-17 18:00:00	66.06	47.66	34.09	-1.39	865.02	7.44007
2019-01-17 18:15:00	45.27	32.66	23.11	-1.43	865.13	5.45323
2019-01-17 18:30:00	41.64	30.04	20.45	-1.54	865.12	3.87567
2019-01-17 18:45:00	33.35	24.06	16.75	-1.75	865.13	3.00673
2019-01-17 19:00:00	16.33	11.78	8	-1.85	865.23	0.9744
2019-01-17 19:15:00	5.99	4.32	2.58	-1.93	865.42	0.265767
2019-01-17 19:30:00	0.92	0.66	0	-2.2	865.42	0.2737
2019-01-17 19:45:00	0	0	0	-2.29	865.49	0.281633
2019-01-17 20:00:00	0	0	0	-2.39	865.5	0.270667
2019-01-17 20:15:00	0	0	0	-2.45	865.63	0.269733
2019-01-17 20:30:00	0	0	0	-2.51	865.66	0.2772
2019-01-17 20:45:00	0	0	0	-2.39	865.72	0.2688
2019-01-17 21:00:00	0	0	0	-2.29	865.89	0.2716
2019-01-17 21:15:00	0	0	0	-2.35	865.88	0.280933
2019-01-17 21:30:00	0	0	0	-2.46	865.98	0.2597
2019-01-17 21:45:00	0	0	0	-2.43	866.01	0.262733
2019-01-17 22:00:00	0	0	0	-2.39	865.95	0.258533
2019-01-17 22:15:00	0	0	0	-2.37	865.97	0.262033
2019-01-17 22:30:00	0	0	0	-2.48	865.87	0.267867
2019-01-17 22:45:00	0	0	0	-2.22	865.77	0.260633
2019-01-17 23:00:00	0	0	0	-2.18	865.84	0.265067
2019-01-17 23:15:00	0	0	0	-2.17	865.78	0.266467
2019-01-17 23:30:00	0	0	0	-2.42	865.8	0.265533
2019-01-17 23:45:00	0	0	0	-2.43	865.89	0.261333
2019-01-18 00:00:00	0	0	0	-2.48	865.87	0.261333
2019-01-18 00:15:00	0	0	0	-2.26	865.8	0.262967
2019-01-18 00:30:00	0	0	0	-2.19	865.71	0.260167
2019-01-18 00:45:00	0	0	0	-2.15	865.93	0.258067
2019-01-18 01:00:00	0	0	0	-2.06	865.92	0.266467
2019-01-18 01:15:00	0	0	0	-2.11	866.01	0.2618
2019-01-18 01:30:00	0	0	0	-2.22	865.97	0.267867
2019-01-18 01:45:00	0	0	0	-2.22	865.98	0.268333
2019-01-18 02:00:00	0	0	0	-2.21	865.86	0.2674
2019-01-18 02:15:00	0	0	0	-2.31	865.74	0.262967
2019-01-18 02:30:00	0	0	0	-2.3	865.77	0.260167
2019-01-18 02:45:00	0	0	0	-2.38	865.75	0.259933
2019-01-18 03:00:00	0	0	0	-2.52	865.7	0.262733
2019-01-18 03:15:00	0	0	0	-2.53	865.66	0.2604
2019-01-18 03:30:00	0	0	0	-2.52	865.63	0.2653
2019-01-18 03:45:00	0	0	0	-2.53	865.62	0.264133
2019-01-18 04:00:00	0	0	0	-2.58	865.68	0.261567
2019-01-18 04:15:00	0	0	0	-2.58	865.72	0.258767
2019-01-18 04:30:00	0	0	0	-2.62	865.83	0.258533
2019-01-18 04:45:00	0	0	0	-2.67	866.01	0.261333
2019-01-18 05:00:00	0	0	0	-2.76	866.07	0.266233
2019-01-18 05:15:00	0	0	0	-2.78	866.15	0.263667
2019-01-18 05:30:00	0	0	0	-2.83	866.22	0.266467
2019-01-18 05:45:00	0	0	0	-2.92	866.15	0.2611
2019-01-18 06:00:00	0	0	0	-3.03	866.03	0.261567
2019-01-18 06:15:00	0	0	0	-3.05	865.95	0.2618
2019-01-18 06:30:00	0	0	0	-3.36	865.82	0.262733
2019-01-18 06:45:00	0	0	0	-3.71	865.92	0.262267
2019-01-18 07:00:00	0	0	0	-3.83	865.85	0.257133
2019-01-18 07:15:00	0	0	0	-3.94	865.98	0.258533
2019-01-18 07:30:00	0	0	0	-3.94	866.01	0.256667
2019-01-18 07:45:00	0	0	0	-3.94	866.06	0.258533
2019-01-18 08:00:00	0	0	0	-4.02	866.12	0.257367
2019-01-18 08:15:00	0	0	0	-4.07	866.28	0.2597
2019-01-18 08:30:00	0	0	0	-4.07	866.4	0.258767
2019-01-18 08:45:00	0	0	0	-4.12	866.45	0.261333
2019-01-18 09:00:00	0	0	0	-4.1	866.53	0.259467
2019-01-18 09:15:00	0	0	0	-4.11	866.69	0.2611
2019-01-18 09:30:00	0	0	0	-4.03	866.87	0.261333
2019-01-18 09:45:00	0	0	0	-4.04	866.93	0.278833
2019-01-18 10:00:00	0	0	0	-4.03	867.11	0.258533
2019-01-18 10:15:00	0.64	0.46	0	-4.06	867.2	0.0826
2019-01-18 10:30:00	2.73	1.97	1.02	-4.08	867.3	0.819
2019-01-18 10:45:00	15.55	11.22	7.59	-4.01	867.41	2.31047
2019-01-18 11:00:00	23.11	16.67	11.68	-3.91	867.5	3.62063
2019-01-18 11:15:00	31.33	22.6	15.97	-3.85	867.5	5.10393
2019-01-18 11:30:00	42.76	30.85	21.93	-3.75	867.42	6.12547
2019-01-18 11:45:00	47.49	34.27	24.86	-3.68	867.48	6.72653
2019-01-18 12:00:00	50.7	36.58	26.51	-3.56	867.62	7.82133
2019-01-18 12:15:00	57.37	41.39	29.81	-3.47	867.61	8.55353
2019-01-18 12:30:00	66.07	47.67	34.22	-3.39	867.61	9.7944
2019-01-18 12:45:00	72.93	52.62	37.96	-3.37	867.68	10.7858
2019-01-18 13:00:00	85.73	61.86	44.87	-3.41	867.68	12.0458
2019-01-18 13:15:00	83.17	60.01	43.27	-3.24	867.59	11.6058
2019-01-18 13:30:00	81.88	59.08	43.03	-3.19	867.48	11.4543
2019-01-18 13:45:00	76.93	55.5	40.17	-3.2	867.37	11.3365
2019-01-18 14:00:00	86.42	62.35	45.21	-3.19	867.06	11.9982
2019-01-18 14:15:00	95.37	68.81	49.49	-3.1	866.81	13.3089
2019-01-18 14:30:00	93.91	67.75	49.58	-3.1	866.64	13.7454
2019-01-18 14:45:00	102.82	74.18	53.35	-3.03	866.34	14.2303
2019-01-18 15:00:00	105.23	75.92	55.44	-3	866.11	15.8009
2019-01-18 15:15:00	113.58	81.95	59.56	-2.94	865.91	16.0333
2019-01-18 15:30:00	111.21	80.24	59.29	-2.91	865.73	16.2853
2019-01-18 15:45:00	124.07	89.52	65.24	-2.76	865.52	16.6602
2019-01-18 16:00:00	108.24	78.1	57.1	-2.75	865.32	14.2991
2019-01-18 16:15:00	95.94	69.22	50.65	-2.67	865.25	13.7496
2019-01-18 16:30:00	93.87	67.72	49.76	-2.24	865.07	13.1033
2019-01-18 16:45:00	86.34	62.29	45.36	-2.07	865	11.2457
2019-01-18 17:00:00	77.21	55.7	40.4	-1.97	864.92	9.9827
2019-01-18 17:15:00	66.15	47.73	34.8	-2.13	864.8	8.9971
2019-01-18 17:30:00	58.13	41.94	30.43	-1.93	864.62	7.06417
2019-01-18 17:45:00	39.19	28.28	20.28	-1.91	864.7	4.71147
2019-01-18 18:00:00	27.27	19.67	13.92	-1.95	864.65	4.03993
2019-01-18 18:15:00	27.45	19.8	14.07	-2.05	864.68	4.6438
2019-01-18 18:30:00	32.93	23.76	16.99	-1.96	864.58	3.83413
2019-01-18 18:45:00	23.93	17.26	12.42	-1.89	864.43	2.66863
2019-01-18 19:00:00	14.18	10.23	6.98	-1.88	864.29	0.993067
2019-01-18 19:15:00	2.28	1.65	0.58	-2.27	864.25	0.222367
2019-01-18 19:30:00	0	0	0	-2.13	864.18	0.2884
2019-01-18 19:45:00	0	0	0	-2.24	864.02	0.2765
2019-01-18 20:00:00	0	0	0	-2.36	863.98	0.278133
2019-01-18 20:15:00	0	0	0	-2.3	864.07	0.269733
2019-01-18 20:30:00	0	0	0	-2.34	864.22	0.273233
2019-01-18 20:45:00	0	0	0	-2.32	864.4	0.276267
2019-01-18 21:00:00	0	0	0	-2.35	864.5	0.276267
2019-01-18 21:15:00	0	0	0	-2.33	864.57	0.280467
2019-01-18 21:30:00	0	0	0	-2.3	864.66	0.262967
2019-01-18 21:45:00	0	0	0	-2.37	864.81	0.260633
2019-01-18 22:00:00	0	0	0	-2.38	864.85	0.261567
2019-01-18 22:15:00	0	0	0	-2.41	864.86	0.264133
2019-01-18 22:30:00	0	0	0	-2.4	864.82	0.2646
2019-01-18 22:45:00	0	0	0	-2.5	864.73	0.2639
2019-01-18 23:00:00	0	0	0	-2.54	864.72	0.260167
2019-01-18 23:15:00	0	0	0	-2.5	864.7	0.2632
2019-01-18 23:30:00	0	0	0	-2.57	864.62	0.260633
2019-01-18 23:45:00	0	0	0	-2.58	864.62	0.262267
2019-01-19 00:00:00	0	0	0	-2.58	864.53	0.264833
2019-01-19 00:15:00	0	0	0	-2.59	864.61	0.2653
2019-01-19 00:30:00	0	0	0	-2.66	864.5	0.262033
2019-01-19 00:45:00	0	0	0	-2.69	864.58	0.2674
2019-01-19 01:00:00	0	0	0	-2.91	864.7	0.2632
2019-01-19 01:15:00	0	0	0	-2.96	864.77	0.269033
2019-01-19 01:30:00	0	0	0	-2.81	864.79	0.262267
2019-01-19 01:45:00	0	0	0	-2.88	864.94	0.259933
2019-01-19 02:00:00	0	0	0	-2.92	864.99	0.2569
2019-01-19 02:15:00	0	0	0	-2.98	865	0.258533
2019-01-19 02:30:00	0	0	0	-3.01	864.95	0.268567
2019-01-19 02:45:00	0	0	0	-3.02	864.68	0.2667
2019-01-19 03:00:00	0	0	0	-3	864.63	0.2569
2019-01-19 03:15:00	0	0	0	-3.06	864.5	0.264133
2019-01-19 03:30:00	0	0	0	-3.04	864.48	0.2632
2019-01-19 03:45:00	0	0	0	-3.03	864.53	0.263667
2019-01-19 04:00:00	0	0	0	-3.06	864.49	0.2674
2019-01-19 04:15:00	0	0	0	-3.14	864.51	0.269033
2019-01-19 04:30:00	0	0	0	-3.11	864.59	0.2674
2019-01-19 04:45:00	0	0	0	-3.1	864.65	0.269033
2019-01-19 05:00:00	0	0	0	-3.09	864.62	0.265767
2019-01-19 05:15:00	0	0	0	-3.14	864.64	0.265767
2019-01-19 05:30:00	0	0	0	-3.13	864.64	0.260867
2019-01-19 05:45:00	0	0	0	-3.14	864.4	0.259
2019-01-19 06:00:00	0	0	0	-3.16	864.4	0.261567
2019-01-19 06:15:00	0	0	0	-3.16	864.28	0.2604
2019-01-19 06:30:00	0	0	0	-3.21	864.28	0.2583
2019-01-19 06:45:00	0	0	0	-3.3	864.17	0.261333
2019-01-19 07:00:00	0	0	0	-3.44	864.27	0.2604
2019-01-19 07:15:00	0	0	0	-3.52	864.21	0.259933
2019-01-19 07:30:00	0	0	0	-3.56	864.23	0.259933
2019-01-19 07:45:00	0	0	0	-3.56	864.33	0.262033
2019-01-19 08:00:00	0	0	0	-3.56	864.49	0.260633
2019-01-19 08:15:00	0	0	0	-3.53	864.49	0.259933
2019-01-19 08:30:00	0	0	0	-3.52	864.45	0.2583
2019-01-19 08:45:00	0	0	0	-3.49	864.78	0.2569
2019-01-19 09:00:00	0	0	0	-3.51	864.98	0.258067
2019-01-19 09:15:00	0	0	0	-3.42	865.15	0.255967
2019-01-19 09:30:00	0	0	0	-3.32	865.42	0.2569
2019-01-19 09:45:00	0	0	0	-3.36	865.59	0.273
2019-01-19 10:00:00	0	0	0	-3.47	865.54	0.2436
2019-01-19 10:15:00	0.17	0.12	0	-3.6	865.49	0.098467
2019-01-19 10:30:00	4.55	3.29	1.83	-3.55	865.5	0.640967
2019-01-19 10:45:00	13.97	10.08	6.78	-3.43	865.49	2.27803
2019-01-19 11:00:00	33.13	23.91	16.78	-3.28	865.57	6.16723
2019-01-19 11:15:00	54.75	39.5	28.55	-3.13	865.79	9.35923
2019-01-19 11:30:00	77.35	55.81	39.89	-2.9	865.99	11.0493
2019-01-19 11:45:00	95.71	69.06	50.86	-2.75	866.05	14.8479
2019-01-19 12:00:00	129.87	93.7	68.24	-2.52	866.06	14.6067
2019-01-19 12:15:00	97.02	70	50.8	-2.52	866.26	11.6755
2019-01-19 12:30:00	94.15	67.93	49.56	-2.47	866.73	12.0122
2019-01-19 12:45:00	98.51	71.07	51.31	-2.39	867	13.1327
2019-01-19 13:00:00	115.75	83.52	60.51	-2.19	867.2	16.821
2019-01-19 13:15:00	144.41	104.19	75.36	-2.08	867.36	20.0221
2019-01-19 13:30:00	170.44	122.97	87.82	-1.79	867.45	17.8409
2019-01-19 13:45:00	143.34	103.42	72.97	-1.97	867.49	17.0214
2019-01-19 14:00:00	142.14	102.55	72.49	-1.81	867.52	15.2826
2019-01-19 14:15:00	123.99	89.46	64.22	-1.95	867.5	13.408
2019-01-19 14:30:00	86.8	62.63	45.1	-1.82	867.53	9.55617
2019-01-19 14:45:00	50.57	36.49	25.94	-2.03	867.49	5.95257
2019-01-19 15:00:00	52.4	37.8	26.38	-2.05	867.68	6.62107
2019-01-19 15:15:00	57.63	41.58	30.43	-2.08	867.87	9.77573
2019-01-19 15:30:00	58.11	41.92	30.17	-2.1	867.79	9.62313
2019-01-19 15:45:00	67.45	48.66	35.03	-2.17	867.87	10.3075
2019-01-19 16:00:00	80.67	58.21	41.94	-2.14	868.08	10.4207
2019-01-19 16:15:00	62.78	45.3	32.38	-2.13	868.23	8.37527
2019-01-19 16:30:00	68.08	49.12	34.82	-2.11	868.4	8.85803
2019-01-19 16:45:00	58.79	42.42	30.21	-2.16	868.82	6.38097
2019-01-19 17:00:00	39.41	28.44	20.18	-2.15	869.25	4.71543
2019-01-19 17:15:00	24.09	17.38	12.04	-2.44	869.43	2.87303
2019-01-19 17:30:00	23.51	16.96	11.68	-2.48	869.72	2.41033
2019-01-19 17:45:00	21.53	15.54	10.53	-2.57	869.85	2.98153
2019-01-19 18:00:00	27.11	19.56	13.43	-2.55	870.05	2.20383
2019-01-19 18:15:00	8.33	6.01	3.99	-2.62	870.3	0.9212
2019-01-19 18:30:00	7	5.05	3	-2.67	870.35	0.7623
2019-01-19 18:45:00	6.71	4.84	3	-2.81	870.48	0.464333
2019-01-19 19:00:00	3.67	2.65	1.47	-2.95	870.72	0.300533
2019-01-19 19:15:00	0	0	0	-3.01	870.84	0.216067
2019-01-19 19:30:00	0	0	0	-3.06	870.88	0.287933
2019-01-19 19:45:00	0	0	0	-3.2	871.14	0.264367
2019-01-19 20:00:00	0	0	0	-3.34	871.31	0.271133
2019-01-19 20:15:00	0	0	0	-3.34	871.6	0.274167
2019-01-19 20:30:00	0	0	0	-3.47	871.85	0.276033
2019-01-19 20:45:00	0	0	0	-3.58	872.17	0.278133
2019-01-19 21:00:00	0	0	0	-3.64	872.52	0.279067
2019-01-19 21:15:00	0	0	0	-3.7	872.77	0.2716
2019-01-19 21:30:00	0	0	0	-3.76	872.97	0.263667
2019-01-19 21:45:00	0	0	0	-3.84	873.23	0.2681
2019-01-19 22:00:00	0	0	0	-3.89	873.52	0.265067
2019-01-19 22:15:00	0	0	0	-3.93	873.67	0.2618
2019-01-19 22:30:00	0	0	0	-4	873.88	0.262267
2019-01-19 22:45:00	0	0	0	-4.05	873.98	0.262967
2019-01-19 23:00:00	0	0	0	-4.11	874.25	0.263433
2019-01-19 23:15:00	0	0	0	-4.15	874.37	0.264833
2019-01-19 23:30:00	0	0	0	-4.15	874.5	0.2646
2019-01-19 23:45:00	0	0	0	-4.12	874.67	0.2646
2019-01-20 00:00:00	0	0	0	-4.23	874.83	0.2618
2019-01-20 00:15:00	0	0	0	-4.17	874.98	0.2625
2019-01-20 00:30:00	0	0	0	-4.14	875.03	0.2604
2019-01-20 00:45:00	0	0	0	-4.11	875.24	0.2611
2019-01-20 01:00:00	0	0	0	-4.11	875.32	0.2562
2019-01-20 01:15:00	0	0	0	-4.24	875.39	0.265067
2019-01-20 01:30:00	0	0	0	-4.3	875.54	0.2597
2019-01-20 01:45:00	0	0	0	-4.26	875.61	0.262733
2019-01-20 02:00:00	0	0	0	-4.26	875.65	0.2646
2019-01-20 02:15:00	0	0	0	-4.24	875.7	0.2632
2019-01-20 02:30:00	0	0	0	-4.25	875.63	0.265067
2019-01-20 02:45:00	0	0	0	-4.28	875.64	0.2646
2019-01-20 03:00:00	0	0	0	-4.34	875.59	0.265067
2019-01-20 03:15:00	0	0	0	-4.37	875.52	0.267633
2019-01-20 03:30:00	0	0	0	-4.48	875.46	0.263667
2019-01-20 03:45:00	0	0	0	-4.53	875.47	0.266
2019-01-20 04:00:00	0	0	0	-4.57	875.51	0.265533
2019-01-20 04:15:00	0	0	0	-4.61	875.54	0.265533
2019-01-20 04:30:00	0	0	0	-4.63	875.67	0.2681
2019-01-20 04:45:00	0	0	0	-4.6	875.74	0.264833
2019-01-20 05:00:00	0	0	0	-4.55	875.8	0.265533
2019-01-20 05:15:00	0	0	0	-4.62	875.79	0.2674
2019-01-20 05:30:00	0	0	0	-4.56	875.9	0.266233
2019-01-20 05:45:00	0	0	0	-4.67	875.9	0.2667
2019-01-20 06:00:00	0	0	0	-4.73	875.77	0.266
2019-01-20 06:15:00	0	0	0	-4.86	875.72	0.265533
2019-01-20 06:30:00	0	0	0	-4.86	875.81	0.263667
2019-01-20 06:45:00	0	0	0	-4.85	875.73	0.266
2019-01-20 07:00:00	0	0	0	-4.97	875.78	0.2639
2019-01-20 07:15:00	0	0	0	-4.98	875.6	0.259233
2019-01-20 07:30:00	0	0	0	-5.06	875.58	0.2597
2019-01-20 07:45:00	0	0	0	-3.56	864.33	0.262033
2019-01-20 08:00:00	0	0	0	-3.56	864.49	0.260633
2019-01-20 08:15:00	0	0	0	-3.53	864.49	0.259933
2019-01-20 08:30:00	0	0	0	-3.52	864.45	0.2583
2019-01-20 08:45:00	0	0	0	-3.49	864.78	0.2569
2019-01-20 09:00:00	0	0	0	-3.51	864.98	0.258067
2019-01-20 09:15:00	0	0	0	-3.42	865.15	0.255967
2019-01-20 09:30:00	0	0	0	-3.32	865.42	0.2569
2019-01-20 09:45:00	0	0	0	-3.36	865.59	0.273
2019-01-20 10:00:00	0	0	0	-3.47	865.54	0.2436
2019-01-20 10:15:00	0.17	0.12	0	-3.6	865.49	0.098467
2019-01-20 10:30:00	4.55	3.29	1.83	-3.55	865.5	0.640967
2019-01-20 10:45:00	28.64	20.66	14.69	-5.04	875.97	1.1781
2019-01-20 11:00:00	45.55	32.87	23.79	-4.97	875.96	2.51487
2019-01-20 11:15:00	70.12	50.59	36.86	-4.82	876.01	4.0964
2019-01-20 11:30:00	113.66	82.01	60.17	-4.59	875.92	6.78043
2019-01-20 11:45:00	156.27	112.75	82.07	-4.45	875.72	7.9856
2019-01-20 12:00:00	172.35	124.35	90.97	-4.38	875.56	9.19637
2019-01-20 12:15:00	179.68	129.64	94.29	-4.37	875.5	10.678
2019-01-20 12:30:00	229.59	165.65	121.76	-3.93	875.52	13.1686
2019-01-20 12:45:00	208.59	150.5	113.32	-4.19	875.38	13.0625
2019-01-20 13:00:00	219.02	158.02	119.17	-4.27	875.41	19.6632
2019-01-20 13:15:00	243.19	175.46	130.44	-4.34	875.42	28.3796
2019-01-20 13:30:00	287.88	207.71	159.54	-4.06	875.38	37.8098
2019-01-20 13:45:00	263.62	190.2	145.12	-3.79	875.19	34.5361
2019-01-20 14:00:00	170.97	123.35	90	-3.76	875.01	30.24
2019-01-20 14:15:00	152.32	109.9	80.79	-4.07	874.86	26.8662
2019-01-20 14:30:00	214.55	154.8	117.25	-3.57	874.62	27.1518
2019-01-20 14:45:00	232.03	167.41	127.92	-3.29	874.34	24.888
2019-01-20 15:00:00	151.7	109.45	79.98	-3.15	874.02	16.965
2019-01-20 15:15:00	159.73	115.24	92.81	-3.46	873.76	17.8519
2019-01-20 15:30:00	106.41	76.77	60.45	-3.02	873.52	14.4305
2019-01-20 15:45:00	77.26	55.74	41.96	-3.53	873.35	11.2702
2019-01-20 16:00:00	96.76	69.81	51.39	-3.72	873.14	13.8642
2019-01-20 16:15:00	123.95	89.43	67.48	-3.6	872.9	16.7743
2019-01-20 16:30:00	96.86	69.88	50.79	-3.49	872.69	21.0028
2019-01-20 16:45:00	147.71	106.58	74.67	-3.41	872.61	24.5499
2019-01-20 17:00:00	158.32	114.23	85.77	-2.93	872.5	32.8858
2019-01-20 17:15:00	275.09	198.47	177.79	-2.86	872.42	28.6393
2019-01-20 17:30:00	187.29	135.13	107.76	-2.86	872.23	20.912
2019-01-20 17:45:00	125.16	90.3	67.4	-3.08	872.24	20.1068
2019-01-20 18:00:00	124.63	89.92	66.56	-3.07	872.38	20.9664
2019-01-20 18:15:00	106.87	77.1	59.03	-3.08	872.3	19.9649
2019-01-20 18:30:00	64.69	46.67	35.9	-3.46	872.23	10.6517
2019-01-20 18:45:00	39.05	28.17	21.25	-3.56	872.17	6.1404
2019-01-20 19:00:00	22.09	15.94	12.1	-3.73	872.13	4.61113
2019-01-20 19:15:00	14.26	10.29	8.3	-3.94	872.06	3.07767
2019-01-20 19:30:00	7.88	5.69	4.63	-4.22	872.05	1.28637
2019-01-20 19:45:00	0	0	0	-4.4	872.11	0.1729
2019-01-20 20:00:00	0	0	0	-4.57	872.1	0.287933
2019-01-20 20:15:00	0	0	0	-4.87	872.2	0.275567
2019-01-20 20:30:00	0	0	0	-5.2	872.26	0.276267
2019-01-20 20:45:00	0	0	0	-5.29	872.27	0.276033
2019-01-20 21:00:00	0	0	0	-5.5	872.29	0.276033
2019-01-20 21:15:00	0	0	0	-5.55	872.47	0.277433
2019-01-20 21:30:00	0	0	0	-5.92	872.42	0.268567
2019-01-20 21:45:00	0	0	0	-6.41	872.29	0.2618
2019-01-20 22:00:00	0	0	0	-6.41	872.26	0.2646
2019-01-20 22:15:00	0	0	0	-6.39	872.19	0.2646
2019-01-20 22:30:00	0	0	0	-6.4	872.06	0.262033
2019-01-20 22:45:00	0	0	0	-6.22	872	0.2646
2019-01-20 23:00:00	0	0	0	-6.29	871.73	0.266233
2019-01-20 23:15:00	0	0	0	-6.7	871.67	0.267633
2019-01-20 23:30:00	0	0	0	-7.2	871.51	0.2667
2019-01-20 23:45:00	0	0	0	-7.26	871.53	0.2667
2019-01-21 00:00:00	0	0	0	-7.16	871.48	0.2709
2019-01-21 00:15:00	0	0	0	-6.9	871.39	0.272767
2019-01-21 00:30:00	0	0	0	-6.33	871.13	0.269267
2019-01-21 00:45:00	0	0	0	-5.97	871.18	0.269967
2019-01-21 01:00:00	0	0	0	-5.85	871.06	0.265767
2019-01-21 01:15:00	0	0	0	-5.78	870.83	0.2709
2019-01-21 01:30:00	0	0	0	-5.46	870.69	0.271367
2019-01-21 01:45:00	0	0	0	-5.63	870.36	0.273467
2019-01-21 02:00:00	0	0	0	-5.5	870.41	0.2723
2019-01-21 02:15:00	0	0	0	-5.43	870.2	0.266233
2019-01-21 02:30:00	0	0	0	-5.46	870.18	0.269033
2019-01-21 02:45:00	0	0	0	-5.54	869.97	0.273233
2019-01-21 03:00:00	0	0	0	-5.39	869.81	0.2667
2019-01-21 03:15:00	0	0	0	-5.44	869.74	0.2716
2019-01-21 03:30:00	0	0	0	-5.41	869.59	0.272767
2019-01-21 03:45:00	0	0	0	-5.47	869.49	0.2709
2019-01-21 04:00:00	0	0	0	-5.5	869.37	0.269033
2019-01-21 04:15:00	0	0	0	-5.52	869.24	0.271133
2019-01-21 04:30:00	0	0	0	-5.61	869.29	0.2681
2019-01-21 04:45:00	0	0	0	-5.65	869.2	0.2716
2019-01-21 05:00:00	0	0	0	-5.69	869.13	0.273467
2019-01-21 05:15:00	0	0	0	-5.81	869.08	0.273
2019-01-21 05:30:00	0	0	0	-5.78	869.07	0.273
2019-01-21 05:45:00	0	0	0	-5.81	868.92	0.273233
2019-01-21 06:00:00	0	0	0	-5.69	868.82	0.272533
2019-01-21 06:15:00	0	0	0	-5.72	868.74	0.268567
2019-01-21 06:30:00	0	0	0	-5.81	868.56	0.2716
2019-01-21 06:45:00	0	0	0	-5.92	868.48	0.273
2019-01-21 07:00:00	0	0	0	-6	868.24	0.271367
2019-01-21 07:15:00	0	0	0	-6.01	868.28	0.274167
2019-01-21 07:30:00	0	0	0	-5.92	868.24	0.270433
2019-01-21 07:45:00	0	0	0	-5.88	868.24	0.271133
2019-01-21 08:00:00	0	0	0	-5.9	868.06	0.267633
2019-01-21 08:15:00	0	0	0	-5.95	868.15	0.267167
2019-01-21 08:30:00	0	0	0	-6.05	868.22	0.2653
2019-01-21 08:45:00	0	0	0	-6.15	868.19	0.267167
2019-01-21 09:00:00	0	0	0	-6.27	868.36	0.269967
2019-01-21 09:15:00	0	0	0	-6.33	868.64	0.2695
2019-01-21 09:30:00	0	0	0	-6.59	868.72	0.2702
2019-01-21 09:45:00	0	0	0	-6.89	868.82	0.300533
2019-01-21 10:00:00	0	0	0	-6.93	868.74	0.224
2019-01-21 10:15:00	2.47	1.78	1.48	-7.35	868.91	0.775133
2019-01-21 10:30:00	15.42	11.13	8.9	-7.63	869.05	2.1665
2019-01-21 10:45:00	30.94	22.32	17.33	-7.71	869.13	3.1255
2019-01-21 11:00:00	34.87	25.16	19.74	-7.21	869.1	4.13817
2019-01-21 11:15:00	50.45	36.4	29.09	-6.6	868.92	6.52423
2019-01-21 11:30:00	75.75	54.66	42.96	-6.18	868.91	9.57227
2019-01-21 11:45:00	101.45	73.19	58.35	-6.05	868.96	11.9635
2019-01-21 12:00:00	118.45	85.46	67.22	-5.98	868.74	13.8026
2019-01-21 12:15:00	154.05	111.15	90.96	-5.61	868.96	23.236
2019-01-21 12:30:00	203.85	147.08	125.08	-5.14	868.77	30.9085
2019-01-21 12:45:00	183.58	132.45	108.41	-4.91	868.61	31.7907
2019-01-21 13:00:00	191.76	138.35	109.68	-4.82	868.56	33.897
2019-01-21 13:15:00	196.56	141.82	120.65	-4.6	868.55	38.0445
2019-01-21 13:30:00	257.95	186.11	168.98	-4.26	868.36	58.1912
2019-01-21 13:45:00	303.51	218.98	197.33	-3.94	868.39	57.3102
2019-01-21 14:00:00	337.39	243.43	226.57	-3.82	868.11	73.4977
2019-01-21 14:15:00	393.91	284.21	271.77	-3.53	867.92	68.0601
2019-01-21 14:30:00	278.67	201.06	172.41	-3.25	867.61	57.5321
2019-01-21 14:45:00	291.93	210.63	179.09	-3.53	867.44	58.7958
2019-01-21 15:00:00	401.11	289.4	261.48	-3.22	867.18	70.9499
2019-01-21 15:15:00	327.29	236.14	196.76	-3.25	866.95	53.2929
2019-01-21 15:30:00	278.98	201.28	167.82	-3.36	866.85	47.5111
2019-01-21 15:45:00	351.43	253.56	217.31	-3.17	866.72	55.706
2019-01-21 16:00:00	394.86	284.89	248.85	-2.9	866.6	62.9064
2019-01-21 16:15:00	435.8	314.43	279.24	-2.89	866.41	63.5026
2019-01-21 16:30:00	377.02	272.02	234.23	-2.46	866.37	66.986
2019-01-21 16:45:00	482.32	347.99	318.05	-1.92	866.38	68.3872
2019-01-21 17:00:00	315.14	227.37	201.57	-2.44	866.2	49.6384
2019-01-21 17:15:00	220.15	158.84	134.49	-2.25	866.2	43.6431
2019-01-21 17:30:00	308.01	222.23	195.64	-2.72	866.4	49.6995
2019-01-21 17:45:00	258.85	186.76	157.71	-2.5	866.46	37.0153
2019-01-21 18:00:00	214.45	154.73	134.95	-2.63	866.41	37.3756
2019-01-21 18:15:00	186.31	134.43	119.01	-2.33	866.42	20.3943
2019-01-21 18:30:00	194.31	140.2	123.35	-2.99	866.39	31.8416
2019-01-21 18:45:00	176.53	127.37	110.69	-2.8	866.45	19.7346
2019-01-21 19:00:00	117.69	84.92	75.33	-3.08	866.57	10.6995
2019-01-21 19:15:00	58.15	41.95	36.91	-3.21	866.6	5.21897
2019-01-21 19:30:00	16.07	11.59	9.13	-3.41	866.68	1.0969
[truncated: 68,177 more rows]
