# Supplementary material
Source: PeerJ journal article supplement (doi:10.7717/peerj-cs.3610)
Supplement: Solar_station_site_3_Nominal_capacity30MW.xlsx [file Solar_station_site_3_Nominal_capacity30MW.xlsx]

## Sheet: Sheet1
Time(year-month-day h:m:s)	Total solar irradiance (W/m2)	Direct normal irradiance (W/m2)	Global horizontal irradiance (W/m2)	Atmosphere (hpa)	Relative humidity (%)	Power (MW)
2019-01-01	0	0	0	1028.9	57.6	-0.0357
2019-01-01 00:15:00	0	0	0	1028.7	58.3	-0.0357
2019-01-01 00:30:00	0	0	0	1028.7	58	-0.0378
2019-01-01 00:45:00	0	0	0	1028.6	57.2	-0.0378
2019-01-01 01:00:00	0	0	0	1028.6	56.9	-0.0378
2019-01-01 01:15:00	0	0	0	1028.4	56.1	-0.0378
2019-01-01 01:30:00	0	0	0	1028.3	56.9	-0.0378
2019-01-01 01:45:00	0	0	0	1028.2	57.7	-0.0378
2019-01-01 02:00:00	0	33	0	1028.2	57.9	-0.0357
2019-01-01 02:15:00	0	0	0	1028	57.6	-0.0378
2019-01-01 02:30:00	0	0	0	1028.2	57.8	-0.0378
2019-01-01 02:45:00	0	33	0	1028	56.9	-0.0378
2019-01-01 03:00:00	0	0	0	1027.9	57	-0.0378
2019-01-01 03:15:00	0	0	0	1027.7	57.7	-0.0378
2019-01-01 03:30:00	0	0	0	1027.6	58.9	-0.0378
2019-01-01 03:45:00	0	0	0	1027.5	59	-0.0378
2019-01-01 04:00:00	0	0	0	1027.4	59.4	-0.0378
2019-01-01 04:15:00	0	0	0	1027	59.2	-0.0378
2019-01-01 04:30:00	0	0	0	1026.9	58.5	-0.0378
2019-01-01 04:45:00	0	0	0	1026.9	58.3	-0.0378
2019-01-01 05:00:00	0	0	0	1027.1	58.9	-0.0357
2019-01-01 05:15:00	0	0	0	1027.1	59.2	-0.0357
2019-01-01 05:30:00	0	0	0	1027.1	59.4	-0.0378
2019-01-01 05:45:00	0	0	0	1027.2	59.4	-0.0378
2019-01-01 06:00:00	0	0	0	1026.9	58.8	-0.0357
2019-01-01 06:15:00	0	0	0	1026.9	58.2	-0.0378
2019-01-01 06:30:00	0	0	0	1026.6	57.2	-0.0357
2019-01-01 06:45:00	0	39	0	1026.7	57.4	-0.0378
2019-01-01 07:00:00	0	0	0	1026.6	57.2	-0.0378
2019-01-01 07:15:00	0	0	0	1026.5	57.7	-0.0357
2019-01-01 07:30:00	47	0	0	1026.6	57.4	0.100181
2019-01-01 07:45:00	124	0	0	1026.6	56.2	0.404985
2019-01-01 08:00:00	206	30	33	1026.7	56.8	1.02525
2019-01-01 08:15:00	281	0	40	1026.8	56.5	1.93753
2019-01-01 08:30:00	368	0	45	1026.8	54.7	2.94786
2019-01-01 08:45:00	433	0	47	1026.7	53.5	4.06477
2019-01-01 09:00:00	506	0	50	1026.9	53	8.20627
2019-01-01 09:15:00	565	33	55	1027.1	52.6	9.35089
2019-01-01 09:30:00	620	0	57	1027.2	51.1	8.31711
2019-01-01 09:45:00	681	0	58	1026.9	51	5.51632
2019-01-01 10:00:00	716	0	63	1027	50.3	5.84457
2019-01-01 10:15:00	744	0	67	1027.1	49.2	5.71881
2019-01-01 10:30:00	778	0	69	1027.1	47.3	8.58223
2019-01-01 10:45:00	799	0	77	1026.9	46.8	7.88868
2019-01-01 11:00:00	822	0	74	1026.6	46.9	11.9108
2019-01-01 11:15:00	855	0	71	1026.1	46.1	12.1205
2019-01-01 11:30:00	863	0	73	1026	45.3	12.217
2019-01-01 11:45:00	878	0	72	1025.6	44.5	21.1316
2019-01-01 12:00:00	875	0	75	1025.6	44.6	20.3388
2019-01-01 12:15:00	869	0	77	1025.7	43.9	21.2852
2019-01-01 12:30:00	862	0	76	1025.3	44.2	20.6287
2019-01-01 12:45:00	867	0	75	1025.1	44.1	20.6521
2019-01-01 13:00:00	826	31	79	1024.8	46.6	20.3686
2019-01-01 13:15:00	784	0	81	1024.5	45.4	19.7462
2019-01-01 13:30:00	748	0	82	1024.6	43	19.0045
2019-01-01 13:45:00	715	40	80	1024.5	39.7	17.9089
2019-01-01 14:00:00	671	0	79	1024.4	44.4	16.4914
2019-01-01 14:15:00	639	0	77	1024.5	46.8	15.0654
2019-01-01 14:30:00	569	0	73	1024.4	47.3	14.0146
2019-01-01 14:45:00	532	0	74	1024.5	48.2	12.887
2019-01-01 15:00:00	482	0	70	1024.3	51.5	11.1286
2019-01-01 15:15:00	420	0	66	1024.6	48.9	9.17398
2019-01-01 15:30:00	344	45	62	1024.7	48.7	3.99443
2019-01-01 15:45:00	271	43	56	1024.7	49.2	2.75177
2019-01-01 16:00:00	197	43	48	1024.8	49.9	1.85441
2019-01-01 16:15:00	132	33	37	1024.9	49.6	0.957044
2019-01-01 16:30:00	68	52	0	1025	52.5	0.338909
2019-01-01 16:45:00	0	0	0	1025.1	55.5	0.174783
2019-01-01 17:00:00	0	0	0	1025	54.4	-0.0042
2019-01-01 17:15:00	0	0	0	1025.2	54.8	-0.0588
2019-01-01 17:30:00	0	40	0	1025.6	54.4	-0.0357
2019-01-01 17:45:00	0	0	0	1025.7	56	-0.0357
2019-01-01 18:00:00	0	0	0	1026	57.3	-0.0378
2019-01-01 18:15:00	0	0	0	1026.2	56.2	-0.0357
2019-01-01 18:30:00	0	0	0	1026.5	56.1	-0.0378
2019-01-01 18:45:00	0	0	0	1026.3	55.9	-0.0378
2019-01-01 19:00:00	0	0	0	1026.7	56.5	-0.0378
2019-01-01 19:15:00	0	0	0	1026.8	57.3	-0.0378
2019-01-01 19:30:00	0	0	0	1027	57.4	-0.0378
2019-01-01 19:45:00	0	0	0	1027.2	57.8	-0.0378
2019-01-01 20:00:00	0	0	0	1027.2	58.1	-0.0378
2019-01-01 20:15:00	0	0	0	1027.2	58.5	-0.0378
2019-01-01 20:30:00	0	0	0	1027.3	59.1	-0.0357
2019-01-01 20:45:00	0	0	0	1027.3	59	-0.0357
2019-01-01 21:00:00	0	0	0	1027.7	59.7	-0.0357
2019-01-01 21:15:00	0	0	0	1027.7	60.9	-0.0357
2019-01-01 21:30:00	0	0	0	1027.8	60.7	-0.0336
2019-01-01 21:45:00	0	0	0	1027.9	60.7	-0.0378
2019-01-01 22:00:00	0	0	0	1028.1	61.2	-0.0378
2019-01-01 22:15:00	0	0	0	1028.1	61.1	-0.0378
2019-01-01 22:30:00	0	0	0	1028.1	61.1	-0.0357
2019-01-01 22:45:00	0	0	0	1028.2	61.6	-0.0357
2019-01-01 23:00:00	0	0	0	1028.4	60.9	-0.0378
2019-01-01 23:15:00	0	0	0	1028.4	60.8	-0.0357
2019-01-01 23:30:00	0	0	0	1028.4	61.2	-0.0357
2019-01-01 23:45:00	0	0	0	1028.4	61	-0.0378
2019-01-02	0	0	0	1028.3	61.4	-0.0378
2019-01-02 00:15:00	0	0	0	1028.4	62.3	-0.0378
2019-01-02 00:30:00	0	0	0	1028.5	62.7	-0.0357
2019-01-02 00:45:00	0	0	0	1028.4	62.3	-0.0357
2019-01-02 01:00:00	0	0	0	1028.4	63.1	-0.0378
2019-01-02 01:15:00	0	0	0	1028.5	63.7	-0.0378
2019-01-02 01:30:00	0	0	0	1028.5	63.9	-0.0378
2019-01-02 01:45:00	0	0	0	1028.8	62.8	-0.0378
2019-01-02 02:00:00	0	0	0	1028.8	62	-0.0357
2019-01-02 02:15:00	0	0	0	1028.7	61.2	-0.0378
2019-01-02 02:30:00	0	0	0	1028.6	61.8	-0.0378
2019-01-02 02:45:00	0	0	0	1028.5	62.1	-0.0378
2019-01-02 03:00:00	0	0	0	1028.6	62.9	-0.0357
2019-01-02 03:15:00	0	0	0	1028.6	63.7	-0.0336
2019-01-02 03:30:00	0	0	0	1028.5	64.3	-0.0378
2019-01-02 03:45:00	0	0	0	1028.6	64.8	-0.0378
2019-01-02 04:00:00	0	0	0	1028.7	65.3	-0.0378
2019-01-02 04:15:00	0	0	0	1028.6	65.6	-0.0378
2019-01-02 04:30:00	0	0	0	1028.6	66	-0.0378
2019-01-02 04:45:00	0	0	0	1028.6	66.5	-0.0378
2019-01-02 05:00:00	0	0	0	1028.7	66.7	-0.0378
2019-01-02 05:15:00	0	0	0	1028.7	67	-0.0378
2019-01-02 05:30:00	0	0	0	1028.9	67.3	-0.0378
2019-01-02 05:45:00	0	0	0	1028.9	67.3	-0.0378
2019-01-02 06:00:00	0	0	0	1029.2	67.2	-0.0378
2019-01-02 06:15:00	0	0	0	1029.3	67.3	-0.0378
2019-01-02 06:30:00	0	0	0	1029.4	67.3	-0.0378
2019-01-02 06:45:00	0	0	0	1029.4	67.1	-0.0378
2019-01-02 07:00:00	0	0	0	1029.2	67.4	-0.0378
2019-01-02 07:15:00	0	0	0	1029.3	67.6	0.0063945
2019-01-02 07:30:00	0	0	0	1029.5	66.8	0.25578
2019-01-02 07:45:00	57	0	0	1029.7	66	0.726842
2019-01-02 08:00:00	120	0	31	1029.9	65.6	1.394
2019-01-02 08:15:00	180	0	39	1030.2	64.5	2.14429
2019-01-02 08:30:00	240	0	47	1030.4	63	2.89671
2019-01-02 08:45:00	287	0	55	1030.7	61.5	4.02214
2019-01-02 09:00:00	330	0	61	1031	60.5	8.63044
2019-01-02 09:15:00	382	0	65	1030.9	58.8	10.3079
2019-01-02 09:30:00	433	0	69	1030.9	56.7	11.7872
2019-01-02 09:45:00	488	0	76	1031	54	13.7567
2019-01-02 10:00:00	552	0	84	1031	53.2	15.1699
2019-01-02 10:15:00	631	0	90	1031	52.8	16.4808
2019-01-02 10:30:00	718	0	96	1030.9	51.7	17.7831
2019-01-02 10:45:00	780	0	101	1030.7	48.1	18.7359
2019-01-02 11:00:00	794	31	102	1030.6	48	19.4819
2019-01-02 11:15:00	795	0	103	1030.5	45.4	19.9444
2019-01-02 11:30:00	804	0	103	1030.3	42.4	20.4475
2019-01-02 11:45:00	783	0	112	1030.2	46.7	21.0443
2019-01-02 12:00:00	773	0	123	1030	47.1	21.2681
2019-01-02 12:15:00	765	0	127	1030	46.4	21.1509
2019-01-02 12:30:00	760	0	125	1029.8	47.7	20.8802
2019-01-02 12:45:00	746	0	123	1030	47	20.586
2019-01-02 13:00:00	736	0	118	1030	47.4	19.6588
2019-01-02 13:15:00	704	0	119	1029.9	47.9	19.4308
2019-01-02 13:30:00	681	0	113	1029.5	49.4	18.6336
2019-01-02 13:45:00	648	0	109	1029.7	49.9	17.8087
2019-01-02 14:00:00	599	0	110	1029.9	52	16.4232
2019-01-02 14:15:00	556	36	106	1029.9	52.1	14.9098
2019-01-02 14:30:00	513	0	100	1029.8	50.9	13.9464
2019-01-02 14:45:00	458	0	96	1029.8	52.8	12.3627
2019-01-02 15:00:00	397	0	92	1030	53.9	10.6234
2019-01-02 15:15:00	342	0	82	1029.9	53.9	8.90114
2019-01-02 15:30:00	283	46	74	1029.9	53.7	4.25447
2019-01-02 15:45:00	224	0	64	1030	53.7	3.00328
2019-01-02 16:00:00	164	58	53	1029.9	53.8	2.11445
2019-01-02 16:15:00	98	0	37	1029.9	54.1	1.40253
2019-01-02 16:30:00	43	0	0	1029.8	54	0.686343
2019-01-02 16:45:00	0	0	0	1029.8	54.4	0.362355
2019-01-02 17:00:00	0	0	0	1029.9	54	0.0106575
2019-01-02 17:15:00	0	30	0	1029.9	54.5	-0.0588
2019-01-02 17:30:00	0	0	0	1030.1	55.7	-0.0378
2019-01-02 17:45:00	0	0	0	1030.1	56.5	-0.0378
2019-01-02 18:00:00	0	0	0	1030	56.8	-0.0378
2019-01-02 18:15:00	0	67	0	1030.2	56.6	-0.0357
2019-01-02 18:30:00	0	0	0	1030.4	56.9	-0.0357
2019-01-02 18:45:00	0	0	0	1030.5	57.7	-0.0378
2019-01-02 19:00:00	0	0	0	1030.8	58.1	-0.0378
2019-01-02 19:15:00	0	0	0	1031	58.3	-0.0357
2019-01-02 19:30:00	0	34	0	1031.2	57.9	-0.0378
2019-01-02 19:45:00	0	35	0	1031.3	58.7	-0.0357
2019-01-02 20:00:00	0	0	0	1031.3	59.3	-0.0378
2019-01-02 20:15:00	0	47	0	1031.8	60	-0.0378
2019-01-02 20:30:00	0	0	0	1031.7	60.2	-0.0378
2019-01-02 20:45:00	0	33	0	1031.9	60.4	-0.0357
2019-01-02 21:00:00	0	0	0	1032	60.4	-0.0357
2019-01-02 21:15:00	0	0	0	1032.2	60.8	-0.0357
2019-01-02 21:30:00	0	0	0	1032.7	60.1	-0.0378
2019-01-02 21:45:00	0	0	0	1032.4	60	-0.0378
2019-01-02 22:00:00	0	0	0	1032.6	60.6	-0.0357
2019-01-02 22:15:00	0	35	0	1032.6	60.8	-0.0378
2019-01-02 22:30:00	0	0	0	1033	60.4	-0.0378
2019-01-02 22:45:00	0	33	0	1032.9	60.2	-0.0378
2019-01-02 23:00:00	0	0	0	1033.5	61.2	-0.0378
2019-01-02 23:15:00	0	0	0	1033.5	61.2	-0.0378
2019-01-02 23:30:00	0	0	0	1033.6	61.4	-0.0357
2019-01-02 23:45:00	0	0	0	1033.8	61.6	-0.0378
2019-01-03	0	0	0	1033.5	62.2	-0.0357
2019-01-03 00:15:00	0	0	0	1033.6	62.5	-0.0378
2019-01-03 00:30:00	0	0	0	1033.4	62.7	-0.0357
2019-01-03 00:45:00	0	0	0	1033.3	63.2	-0.0378
2019-01-03 01:00:00	0	0	0	1033.1	63.5	-0.0357
2019-01-03 01:15:00	0	0	0	1033.2	63.4	-0.0378
2019-01-03 01:30:00	0	0	0	1033.5	63.5	-0.0378
2019-01-03 01:45:00	0	0	0	1033.4	63.6	-0.0357
2019-01-03 02:00:00	0	0	0	1033.3	63.9	-0.0378
2019-01-03 02:15:00	0	0	0	1033.2	63.7	-0.0378
2019-01-03 02:30:00	0	0	0	1033.7	63.6	-0.0378
2019-01-03 02:45:00	0	0	0	1033.7	64	-0.0378
2019-01-03 03:00:00	0	0	0	1033.9	64.2	-0.0378
2019-01-03 03:15:00	0	0	0	1033.9	64.1	-0.0336
2019-01-03 03:30:00	0	0	0	1033.8	64.2	-0.0336
2019-01-03 03:45:00	0	0	0	1033.8	64.1	-0.0378
2019-01-03 04:00:00	0	0	0	1033.9	63.5	-0.0378
2019-01-03 04:15:00	0	0	0	1033.9	62.7	-0.0357
2019-01-03 04:30:00	0	0	0	1033.9	62.3	-0.0357
2019-01-03 04:45:00	0	0	0	1033.7	62.4	-0.0378
2019-01-03 05:00:00	0	0	0	1033.7	62.6	-0.0378
2019-01-03 05:15:00	0	0	0	1033.6	62.7	-0.0378
2019-01-03 05:30:00	0	0	0	1033.8	62.1	-0.0378
2019-01-03 05:45:00	0	0	0	1034.2	60.8	-0.0357
2019-01-03 06:00:00	0	0	0	1034.1	60.3	-0.0378
2019-01-03 06:15:00	0	0	0	1034.1	60.5	-0.0357
2019-01-03 06:30:00	0	0	0	1034.2	61	-0.0378
2019-01-03 06:45:00	0	0	0	1034.3	61.7	-0.0378
2019-01-03 07:00:00	0	0	0	1034.3	62.5	-0.0357
2019-01-03 07:15:00	0	0	0	1034.4	63.2	-0.0063
2019-01-03 07:30:00	0	0	0	1034.7	63.8	0.238728
2019-01-03 07:45:00	0	0	0	1034.9	64.3	0.711921
2019-01-03 08:00:00	38	0	39	1035.2	64.7	1.38548
2019-01-03 08:15:00	56	0	55	1035.1	64.8	2.38515
2019-01-03 08:30:00	77	0	73	1035.1	65	3.62994
2019-01-03 08:45:00	89	0	82	1035.4	65.3	4.82358
2019-01-03 09:00:00	99	0	99	1035.4	65.2	9.2635
2019-01-03 09:15:00	95	0	102	1035.5	65	12.2625
2019-01-03 09:30:00	139	0	119	1035.5	64.8	12.2199
2019-01-03 09:45:00	211	35	129	1035.3	64.4	13.1322
2019-01-03 10:00:00	377	0	174	1034.9	63.7	12.3222
2019-01-03 10:15:00	506	0	128	1035.3	62.8	10.2888
2019-01-03 10:30:00	370	0	117	1035.3	61.5	16.2974
2019-01-03 10:45:00	371	31	133	1035	59.8	18.333
2019-01-03 11:00:00	546	0	147	1035	58.7	18.3671
2019-01-03 11:15:00	654	38	108	1034.7	58.5	13.9784
2019-01-03 11:30:00	801	0	119	1034.6	58	18.2222
2019-01-03 11:45:00	810	0	122	1034.2	56	19.0471
2019-01-03 12:00:00	817	0	115	1034.1	54.9	21.3747
2019-01-03 12:15:00	821	50	112	1033.8	54.6	22.9712
2019-01-03 12:30:00	824	0	106	1033.7	54.5	22.4021
2019-01-03 12:45:00	811	60	100	1033.5	54.2	22.0973
2019-01-03 13:00:00	796	0	101	1033.4	54.3	21.4216
2019-01-03 13:15:00	774	0	101	1033.3	54.3	21.2681
2019-01-03 13:30:00	747	0	98	1033.2	54.2	20.456
2019-01-03 13:45:00	716	0	94	1032.9	54.1	19.1558
2019-01-03 14:00:00	677	62	92	1032.8	54.2	15.7411
2019-01-03 14:15:00	632	0	89	1032.7	53.5	16.4445
2019-01-03 14:30:00	584	0	85	1032.6	53.4	15.4448
2019-01-03 14:45:00	530	0	80	1032.6	54	13.2856
2019-01-03 15:00:00	471	0	77	1032.3	53.9	11.7126
2019-01-03 15:15:00	410	0	71	1032.4	54.4	9.00132
2019-01-03 15:30:00	340	0	66	1032.3	54.8	4.73406
2019-01-03 15:45:00	272	0	59	1032.3	55.1	2.94147
2019-01-03 16:00:00	205	0	50	1032.2	55.5	2.27005
2019-01-03 16:15:00	133	0	38	1032.1	56.3	0.871784
2019-01-03 16:30:00	70	0	0	1032.2	57.3	0.458273
2019-01-03 16:45:00	0	0	0	1032	57.9	0.1556
2019-01-03 17:00:00	0	63	0	1032.1	57.6	0.0021315
2019-01-03 17:15:00	0	0	0	1032.2	58.3	-0.0609
2019-01-03 17:30:00	0	0	0	1032.3	59.2	-0.0378
2019-01-03 17:45:00	0	35	0	1032.3	59.6	-0.0378
2019-01-03 18:00:00	0	0	0	1032.6	59.7	-0.0378
2019-01-03 18:15:00	0	0	0	1032.6	59.8	-0.0357
2019-01-03 18:30:00	0	34	0	1032.7	59.8	-0.0357
2019-01-03 18:45:00	0	0	0	1032.8	59.8	-0.0357
2019-01-03 19:00:00	0	0	0	1032.8	59.9	-0.0378
2019-01-03 19:15:00	0	32	0	1032.9	60.4	-0.0378
2019-01-03 19:30:00	0	0	0	1032.8	60.9	-0.0357
2019-01-03 19:45:00	0	0	0	1033	61.4	-0.0357
2019-01-03 20:00:00	0	0	0	1033	61.3	-0.0378
2019-01-03 20:15:00	0	31	0	1033	61.3	-0.0378
2019-01-03 20:30:00	0	0	0	1032.8	62	-0.0357
2019-01-03 20:45:00	0	0	0	1032.6	62.6	-0.0378
2019-01-03 21:00:00	0	0	0	1032.3	63.4	-0.0357
2019-01-03 21:15:00	0	0	0	1032.4	63.8	-0.0378
2019-01-03 21:30:00	0	0	0	1032.1	64	-0.0357
2019-01-03 21:45:00	0	0	0	1032.3	64.4	-0.0378
2019-01-03 22:00:00	0	0	0	1032.2	64.4	-0.0357
2019-01-03 22:15:00	0	0	0	1032.2	64.5	-0.0378
2019-01-03 22:30:00	0	0	0	1032.2	64.9	-0.0378
2019-01-03 22:45:00	0	0	0	1032.3	65.1	-0.0378
2019-01-03 23:00:00	0	0	0	1032.2	65.3	-0.0378
2019-01-03 23:15:00	0	0	0	1032.4	65.4	-0.0336
2019-01-03 23:30:00	0	0	0	1032.2	65	-0.0357
2019-01-03 23:45:00	0	0	0	1032.2	65.4	-0.0357
2019-01-04	0	0	0	1032.3	65.6	-0.0357
2019-01-04 00:15:00	0	0	0	1032.3	65.7	-0.0378
2019-01-04 00:30:00	0	0	0	1031.8	65.7	-0.0357
2019-01-04 00:45:00	0	0	0	1031.4	66.2	-0.0357
2019-01-04 01:00:00	0	0	0	1031.5	67	-0.0357
2019-01-04 01:15:00	0	0	0	1031.1	67.5	-0.0378
2019-01-04 01:30:00	0	0	0	1030.5	68	-0.0378
2019-01-04 01:45:00	0	0	0	1030.3	68.6	-0.0378
2019-01-04 02:00:00	0	0	0	1030.6	69	-0.0336
2019-01-04 02:15:00	0	0	0	1030.5	69.2	-0.0378
2019-01-04 02:30:00	0	0	0	1030.1	69.4	-0.0378
2019-01-04 02:45:00	0	0	0	1029.9	69.7	-0.0357
2019-01-04 03:00:00	0	0	0	1029.8	69.9	-0.0378
2019-01-04 03:15:00	0	0	0	1029.6	70	-0.0378
2019-01-04 03:30:00	0	0	0	1029.7	70.2	-0.0378
2019-01-04 03:45:00	0	0	0	1029.9	70.3	-0.0357
2019-01-04 04:00:00	0	0	0	1029.8	70.4	-0.0378
2019-01-04 04:15:00	0	0	0	1030	70.4	-0.0378
2019-01-04 04:30:00	0	0	0	1030.2	70.4	-0.0357
2019-01-04 04:45:00	0	0	0	1030.3	70.3	-0.0378
2019-01-04 05:00:00	0	0	0	1030	70.1	-0.0357
2019-01-04 05:15:00	0	0	0	1030.1	70.1	-0.0357
2019-01-04 05:30:00	0	0	0	1030.1	69.9	-0.0378
2019-01-04 05:45:00	0	0	0	1030.4	69.6	-0.0336
2019-01-04 06:00:00	0	0	0	1030.1	69.3	-0.0378
2019-01-04 06:15:00	0	0	0	1030.1	69.1	-0.0378
2019-01-04 06:30:00	0	0	0	1030.3	69.1	-0.0378
2019-01-04 06:45:00	0	0	0	1030.6	69.1	-0.0378
2019-01-04 07:00:00	0	0	0	1030.5	69.2	-0.0378
2019-01-04 07:15:00	0	0	0	1030.4	69.3	-0.0126
2019-01-04 07:30:00	0	0	0	1030.7	69.5	0.232333
2019-01-04 07:45:00	0	0	0	1030.6	69.6	0.705526
2019-01-04 08:00:00	0	0	0	1030.5	69.6	1.36629
2019-01-04 08:15:00	34	0	36	1030.9	69.6	2.10166
2019-01-04 08:30:00	34	0	41	1031.2	69.6	2.94573
2019-01-04 08:45:00	37	0	49	1031.4	69.6	4.18413
2019-01-04 09:00:00	51	0	66	1031.4	69.5	7.21939
2019-01-04 09:15:00	78	0	94	1031.4	69.1	8.56863
2019-01-04 09:30:00	91	0	105	1031.5	68.5	10.1204
2019-01-04 09:45:00	97	0	111	1031.4	68.1	11.7765
2019-01-04 10:00:00	189	0	185	1031.7	67.5	12.7826
2019-01-04 10:15:00	101	0	123	1031.9	66.9	13.9144
2019-01-04 10:30:00	174	0	205	1032.1	66.4	14.7862
2019-01-04 10:45:00	131	0	176	1032.2	66	15.9287
2019-01-04 11:00:00	136	0	177	1032.3	65.5	16.0822
2019-01-04 11:15:00	183	0	220	1031.9	64.6	17.7319
2019-01-04 11:30:00	256	0	248	1031.6	62.2	12.7911
2019-01-04 11:45:00	250	0	245	1031.5	60.1	17.7149
2019-01-04 12:00:00	295	0	260	1031.3	59.5	15.6004
2019-01-04 12:15:00	355	0	281	1031.2	59.4	16.9497
2019-01-04 12:30:00	341	0	293	1031.1	59.8	16.7429
2019-01-04 12:45:00	176	0	205	1031.1	58.9	15.3575
2019-01-04 13:00:00	403	0	307	1030.8	57.7	12.9185
2019-01-04 13:15:00	221	0	217	1030.9	58.3	10.5365
2019-01-04 13:30:00	229	0	212	1030.9	57.3	7.93984
2019-01-04 13:45:00	291	0	207	1030.9	55.2	8.25956
2019-01-04 14:00:00	123	0	113	1030.9	53.9	5.84457
2019-01-04 14:15:00	304	48	160	1031.1	53.5	7.09363
2019-01-04 14:30:00	439	0	174	1031	53.6	6.67799
2019-01-04 14:45:00	417	0	165	1031.1	53.6	5.30317
2019-01-04 15:00:00	322	0	158	1031.2	53.3	5.43959
2019-01-04 15:15:00	201	0	119	1031.3	52.9	2.81784
2019-01-04 15:30:00	254	0	92	1031.2	52.6	2.47893
2019-01-04 15:45:00	202	38	79	1031.6	52.6	3.24201
2019-01-04 16:00:00	86	0	44	1031.7	52.3	2.69635
2019-01-04 16:15:00	61	0	46	1031.9	53	1.60928
2019-01-04 16:30:00	35	0	34	1031.9	53.4	0.876046
2019-01-04 16:45:00	0	0	0	1032.1	53.8	0.181177
2019-01-04 17:00:00	0	0	0	1032.3	53.5	-0.0063
2019-01-04 17:15:00	0	0	0	1032.4	53.8	-0.0399
2019-01-04 17:30:00	0	0	0	1032.5	53.9	-0.0378
2019-01-04 17:45:00	0	0	0	1032.7	54.3	-0.0378
2019-01-04 18:00:00	0	0	0	1033	54.4	-0.0378
2019-01-04 18:15:00	0	0	0	1033.1	54.5	-0.0378
2019-01-04 18:30:00	0	37	0	1033.4	54.4	-0.0378
2019-01-04 18:45:00	0	48	0	1033.7	55.3	-0.0378
2019-01-04 19:00:00	0	56	0	1033.8	55.5	-0.0378
2019-01-04 19:15:00	0	0	0	1033.8	55.8	-0.0378
2019-01-04 19:30:00	0	0	0	1034.2	55.9	-0.0357
2019-01-04 19:45:00	0	0	0	1034.1	56	-0.0378
2019-01-04 20:00:00	0	43	0	1034.6	56.1	-0.0378
2019-01-04 20:15:00	0	0	0	1034.5	56.4	-0.0336
2019-01-04 20:30:00	0	68	0	1034.5	56.7	-0.0378
2019-01-04 20:45:00	0	0	0	1034.7	56.2	-0.0378
2019-01-04 21:00:00	0	0	0	1034.6	56.2	-0.0378
2019-01-04 21:15:00	0	0	0	1034.7	55.8	-0.0378
2019-01-04 21:30:00	0	0	0	1034.5	55.5	-0.0378
2019-01-04 21:45:00	0	0	0	1034.5	55.8	-0.0336
2019-01-04 22:00:00	0	0	0	1034.6	55.9	-0.0378
2019-01-04 22:15:00	0	0	0	1034.7	56.1	-0.0357
2019-01-04 22:30:00	0	0	0	1034.8	56.4	-0.0378
2019-01-04 22:45:00	0	56	0	1034.7	56.4	-0.0378
2019-01-04 23:00:00	0	0	0	1035	56.6	-0.0357
2019-01-04 23:15:00	0	0	0	1035.1	57.1	-0.0378
2019-01-04 23:30:00	0	0	0	1035.3	56.7	-0.0378
2019-01-04 23:45:00	0	0	0	1035	56.4	-0.0378
2019-01-05	0	0	0	1035.2	55.8	-0.0378
2019-01-05 00:15:00	0	50	0	1035.3	55.2	-0.0378
2019-01-05 00:30:00	0	50	0	1035.2	55	-0.0378
2019-01-05 00:45:00	0	0	0	1035.3	54.8	-0.0357
2019-01-05 01:00:00	0	0	0	1035.3	54.9	-0.0378
2019-01-05 01:15:00	0	0	0	1035.1	55	-0.0378
2019-01-05 01:30:00	0	0	0	1035.2	54.6	-0.0378
2019-01-05 01:45:00	0	0	0	1035.4	55.2	-0.0378
2019-01-05 02:00:00	0	0	0	1035.6	55.8	-0.0378
2019-01-05 02:15:00	0	46	0	1035.5	56	-0.0357
2019-01-05 02:30:00	0	45	0	1035.3	55.6	-0.0378
2019-01-05 02:45:00	0	0	0	1035.5	53.7	-0.0357
2019-01-05 03:00:00	0	0	0	1035.7	54	-0.0378
2019-01-05 03:15:00	0	0	0	1036	54.3	-0.0378
2019-01-05 03:30:00	0	38	0	1035.8	54.4	-0.0378
2019-01-05 03:45:00	0	32	0	1036	54.4	-0.0378
2019-01-05 04:00:00	0	0	0	1036.1	53.1	-0.0357
2019-01-05 04:15:00	0	37	0	1036.1	51.9	-0.0378
2019-01-05 04:30:00	0	0	0	1036.1	52	-0.0336
2019-01-05 04:45:00	0	0	0	1036.1	51.9	-0.0378
2019-01-05 05:00:00	0	0	0	1036	51.4	-0.0357
2019-01-05 05:15:00	0	0	0	1036	51.8	-0.0357
2019-01-05 05:30:00	0	0	0	1036.3	52.5	-0.0378
2019-01-05 05:45:00	0	37	0	1036.3	51.2	-0.0378
2019-01-05 06:00:00	0	39	0	1036.1	50.7	-0.0378
2019-01-05 06:15:00	0	0	0	1036.3	51.3	-0.0357
2019-01-05 06:30:00	0	0	0	1036.2	52.5	-0.0378
2019-01-05 06:45:00	0	0	0	1036.7	53.4	-0.0378
2019-01-05 07:00:00	0	0	0	1036.9	51.1	-0.0357
2019-01-05 07:15:00	0	39	0	1037.1	50.9	-0.0378
2019-01-05 07:30:00	0	0	0	1037.6	49.5	0.0362355
2019-01-05 07:45:00	0	0	0	1037.5	52.1	0.230202
2019-01-05 08:00:00	61	0	45	1037.8	54	0.498771
2019-01-05 08:15:00	90	0	55	1037.9	54.1	0.754551
2019-01-05 08:30:00	177	0	71	1038	55.4	1.11051
2019-01-05 08:45:00	138	33	95	1037.9	55.3	1.56665
2019-01-05 09:00:00	160	0	104	1038	54.5	1.50484
2019-01-05 09:15:00	187	0	110	1038.2	53.9	1.73291
2019-01-05 09:30:00	443	0	81	1038.5	53.1	2.3681
2019-01-05 09:45:00	604	0	88	1038.5	51.8	3.01181
2019-01-05 10:00:00	655	0	89	1038.5	47.2	2.87326
2019-01-05 10:15:00	714	0	91	1038.3	45.9	3.11412
2019-01-05 10:30:00	734	0	95	1038.3	44	3.19938
2019-01-05 10:45:00	753	0	108	1038.1	43.4	3.22922
2019-01-05 11:00:00	755	0	102	1037.9	43.5	3.87933
2019-01-05 11:15:00	820	30	91	1037.6	43.6	3.83883
2019-01-05 11:30:00	836	36	86	1037.4	43.7	4.02214
2019-01-05 11:45:00	858	0	81	1037.2	41.7	3.21856
2019-01-05 12:00:00	889	0	77	1036.7	41	3.15675
2019-01-05 12:15:00	890	0	71	1036.1	40.2	3.22922
2019-01-05 12:30:00	892	0	68	1035.9	39.4	3.31875
2019-01-05 12:45:00	893	0	66	1035.7	40.8	3.12904
2019-01-05 13:00:00	881	0	62	1035.5	41.9	2.66651
2019-01-05 13:15:00	897	0	48	1035.1	40.4	2.42565
2019-01-05 13:30:00	880	36	46	1034.9	40.2	2.42352
2019-01-05 13:45:00	847	0	46	1034.7	39.6	2.00787
2019-01-05 14:00:00	806	0	45	1034.6	39.1	2.17839
2019-01-05 14:15:00	763	31	44	1034.5	37.2	2.80079
2019-01-05 14:30:00	723	32	41	1034.6	37.4	3.33153
2019-01-05 14:45:00	670	0	41	1034.7	37.7	2.21676
2019-01-05 15:00:00	613	0	39	1034.8	38.4	1.17233
2019-01-05 15:15:00	557	0	37	1034.8	39.7	0.841943
2019-01-05 15:30:00	486	0	37	1034.9	40.1	0.483851
2019-01-05 15:45:00	414	0	34	1034.8	38.6	0.302673
2019-01-05 16:00:00	329	0	31	1034.9	37.4	0.260043
2019-01-05 16:15:00	246	0	0	1035	39.6	0.121496
2019-01-05 16:30:00	152	0	0	1034.8	38.6	0
2019-01-05 16:45:00	56	44	0	1034.9	40.2	-0.0462
2019-01-05 17:00:00	0	0	0	1034.9	42.8	-0.0357
2019-01-05 17:15:00	0	30	0	1035	45.4	-0.0357
2019-01-05 17:30:00	0	0	0	1034.7	47.1	-0.0378
2019-01-05 17:45:00	0	0	0	1034.8	48	-0.0378
2019-01-05 18:00:00	0	0	0	1034.7	50.8	-0.0378
2019-01-05 18:15:00	0	48	0	1034.9	52.8	-0.0378
2019-01-05 18:30:00	0	58	0	1034.8	53.3	-0.0336
2019-01-05 18:45:00	0	0	0	1034.8	51.5	-0.0378
2019-01-05 19:00:00	0	53	0	1034.7	51.3	-0.0357
2019-01-05 19:15:00	0	32	0	1034.7	50.6	-0.0378
2019-01-05 19:30:00	0	0	0	1034.8	50.3	-0.0378
2019-01-05 19:45:00	0	0	0	1034.7	53.3	-0.0378
2019-01-05 20:00:00	0	60	0	1034.7	55.3	-0.0336
2019-01-05 20:15:00	0	0	0	1034.6	57.6	-0.0357
2019-01-05 20:30:00	0	0	0	1034.5	56.9	-0.0378
2019-01-05 20:45:00	0	44	0	1034.5	56.6	-0.0378
2019-01-05 21:00:00	0	0	0	1034.4	54.1	-0.0357
2019-01-05 21:15:00	0	0	0	1034.3	56.2	-0.0378
2019-01-05 21:30:00	0	0	0	1034.3	56.2	-0.0357
2019-01-05 21:45:00	0	129	0	1034.2	57.8	-0.0378
2019-01-05 22:00:00	0	0	0	1034.1	57.9	-0.0378
2019-01-05 22:15:00	0	98	0	1034	58.3	-0.0378
2019-01-05 22:30:00	0	0	0	1034.1	58.8	-0.0357
2019-01-05 22:45:00	0	0	0	1033.8	57.6	-0.0378
2019-01-05 23:00:00	0	65	0	1033.7	58.6	-0.0378
2019-01-05 23:15:00	0	0	0	1033.6	58.6	-0.0378
2019-01-05 23:30:00	0	53	0	1033.4	59.6	-0.0378
2019-01-05 23:45:00	0	0	0	1033.2	59.5	-0.0378
2019-01-06	0	0	0	1033	58.7	-0.0357
2019-01-06 00:15:00	0	0	0	1032.7	59	-0.0378
2019-01-06 00:30:00	0	0	0	1032.5	58.7	-0.0378
2019-01-06 00:45:00	0	0	0	1032.1	59.3	-0.0378
2019-01-06 01:00:00	0	0	0	1032	59.7	-0.0378
2019-01-06 01:15:00	0	32	0	1031.9	58.9	-0.0378
2019-01-06 01:30:00	0	32	0	1031.7	58.4	-0.0378
2019-01-06 01:45:00	0	100	0	1031.6	57.9	-0.0378
2019-01-06 02:00:00	0	64	0	1031.4	58	-0.0378
2019-01-06 02:15:00	0	89	0	1031.1	58.7	-0.0378
2019-01-06 02:30:00	0	68	0	1030.9	59.6	-0.0378
2019-01-06 02:45:00	0	54	0	1030.7	59.6	-0.0378
2019-01-06 03:00:00	0	52	0	1030.4	59.4	-0.0378
2019-01-06 03:15:00	0	35	0	1030.2	58.9	-0.0378
2019-01-06 03:30:00	0	0	0	1030	58.9	-0.0378
2019-01-06 03:45:00	0	0	0	1029.8	59.2	-0.0378
2019-01-06 04:00:00	0	0	0	1029.9	59.1	-0.0378
2019-01-06 04:15:00	0	0	0	1029.6	59.2	-0.0378
2019-01-06 04:30:00	0	56	0	1029.4	59.5	-0.0378
2019-01-06 04:45:00	0	0	0	1029.4	59.6	-0.0378
2019-01-06 05:00:00	0	0	0	1029.1	59.8	-0.0378
2019-01-06 05:15:00	0	0	0	1028.7	58.8	-0.0378
2019-01-06 05:30:00	0	0	0	1028.6	57.4	-0.0378
2019-01-06 05:45:00	0	129	0	1028.4	57.2	-0.0378
2019-01-06 06:00:00	0	0	0	1028.3	57.2	-0.0378
2019-01-06 06:15:00	0	96	0	1028.2	57.1	-0.0378
2019-01-06 06:30:00	0	0	0	1028.2	57.2	-0.0378
2019-01-06 06:45:00	0	0	0	1028.6	57.1	-0.0357
2019-01-06 07:00:00	0	0	0	1028.6	57.8	-0.0378
2019-01-06 07:15:00	0	0	0	1028.5	58	-0.0378
2019-01-06 07:30:00	0	0	0	1028.5	58.4	-0.0378
2019-01-06 07:45:00	31	119	0	1028.4	59.1	0.008526
2019-01-06 08:00:00	89	0	42	1028.4	59.1	0.068208
2019-01-06 08:15:00	142	60	59	1028.7	58.5	0.134285
2019-01-06 08:30:00	178	0	69	1029.6	58.2	0.28349
2019-01-06 08:45:00	255	30	84	1029.6	56.8	0.396459
2019-01-06 09:00:00	347	72	90	1029.4	56.2	0.547795
2019-01-06 09:15:00	431	0	95	1029.5	54.1	0.594688
2019-01-06 09:30:00	491	0	95	1029.6	53.3	0.83768
2019-01-06 09:45:00	565	0	96	1029.7	54.2	1.31087
2019-01-06 10:00:00	619	0	101	1029.9	54.2	1.25119
2019-01-06 10:15:00	528	0	131	1030.1	47.6	1.59862
2019-01-06 10:30:00	604	0	130	1030.2	43	1.13609
2019-01-06 10:45:00	765	0	117	1030.5	38	1.78407
2019-01-06 11:00:00	795	0	65	1030.2	38.2	2.46401
2019-01-06 11:15:00	756	0	107	1030.5	39.9	3.00328
2019-01-06 11:30:00	797	0	0	1030.7	39.3	3.12265
2019-01-06 11:45:00	796	0	57	1030.3	39.4	1.72225
2019-01-06 12:00:00	815	0	82	1030.4	38.5	1.53894
2019-01-06 12:15:00	783	0	69	1030.7	37.7	2.97131
2019-01-06 12:30:00	826	0	107	1030.9	37.4	2.5578
2019-01-06 12:45:00	849	0	88	1031	35.1	2.27644
2019-01-06 13:00:00	828	0	44	1031	36.4	1.46434
2019-01-06 13:15:00	793	0	62	1031	35.5	1.28529
2019-01-06 13:30:00	789	0	97	1031	33.9	1.1638
2019-01-06 13:45:00	748	0	0	1031.1	33.3	1.17019
2019-01-06 14:00:00	695	0	88	1031.1	34.6	1.09559
2019-01-06 14:15:00	694	0	62	1031.3	33.6	0.912282
2019-01-06 14:30:00	654	42	83	1031.7	34.1	0.839811
2019-01-06 14:45:00	602	0	78	1032.1	34.3	0.355961
2019-01-06 15:00:00	549	0	34	1032.1	34.4	0.304804
2019-01-06 15:15:00	498	0	62	1032.2	34.6	0.296279
2019-01-06 15:30:00	428	40	58	1032.2	35.9	0.245122
2019-01-06 15:45:00	360	0	53	1032.5	35.2	0.330383
2019-01-06 16:00:00	287	0	0	1033	35.5	0.093786
2019-01-06 16:15:00	206	0	32	1033	34.5	0.0916545
2019-01-06 16:30:00	113	0	0	1033.5	33.4	0.038367
2019-01-06 16:45:00	36	47	0	1033.6	35.2	-0.0336
2019-01-06 17:00:00	0	0	0	1033.6	33.1	-0.0378
2019-01-06 17:15:00	0	39	0	1033.8	35.1	-0.0378
2019-01-06 17:30:00	0	0	0	1034.1	35.4	-0.0378
2019-01-06 17:45:00	0	0	0	1034.2	36.9	-0.0378
2019-01-06 18:00:00	0	0	0	1034.2	37.3	-0.0378
2019-01-06 18:15:00	0	30	0	1034.3	37.4	-0.0378
2019-01-06 18:30:00	0	0	0	1034.5	37.5	-0.0378
2019-01-06 18:45:00	0	0	0	1034.7	37.9	-0.0378
2019-01-06 19:00:00	0	0	0	1034.7	36.7	-0.0378
2019-01-06 19:15:00	0	0	0	1034.8	36.6	-0.0378
2019-01-06 19:30:00	0	35	0	1034.9	38.8	-0.0378
2019-01-06 19:45:00	0	0	0	1035.2	39.5	-0.0378
2019-01-06 20:00:00	0	0	0	1035.3	39.5	-0.0378
2019-01-06 20:15:00	0	0	0	1035.3	40.2	-0.0378
2019-01-06 20:30:00	0	0	0	1035.5	40.8	-0.0378
2019-01-06 20:45:00	0	0	0	1035.7	41	-0.0378
2019-01-06 21:00:00	0	0	0	1035.7	42.5	-0.0378
2019-01-06 21:15:00	0	0	0	1035.8	43.1	-0.0378
2019-01-06 21:30:00	0	0	0	1035.9	44.7	-0.0378
2019-01-06 21:45:00	0	0	0	1036.1	45.6	-0.0378
2019-01-06 22:00:00	0	0	0	1036.7	47	-0.0378
2019-01-06 22:15:00	0	35	0	1036.8	47	-0.0378
2019-01-06 22:30:00	0	0	0	1037	49	-0.0378
2019-01-06 22:45:00	0	0	0	1037.2	48.4	-0.0378
2019-01-06 23:00:00	0	0	0	1037.3	48.6	-0.0378
2019-01-06 23:15:00	0	0	0	1037.4	48.3	-0.0378
2019-01-06 23:30:00	0	0	0	1037.5	48.6	-0.0378
2019-01-06 23:45:00	0	0	0	1037.4	49.1	-0.0378
2019-01-07	0	0	0	1037.3	49.5	-0.0378
2019-01-07 00:15:00	0	0	0	1037.6	49.9	-0.0378
2019-01-07 00:30:00	0	0	0	1037.9	50.2	-0.0378
2019-01-07 00:45:00	0	0	0	1037.9	49.8	-0.0378
2019-01-07 01:00:00	0	0	0	1038.1	49.6	-0.0378
2019-01-07 01:15:00	0	0	0	1038.1	49.8	-0.0378
2019-01-07 01:30:00	0	0	0	1038	49.9	-0.0378
2019-01-07 01:45:00	0	0	0	1038	49.9	-0.0378
2019-01-07 02:00:00	0	0	0	1038.3	49.8	-0.0378
2019-01-07 02:15:00	0	0	0	1038.5	49.4	-0.0378
2019-01-07 02:30:00	0	0	0	1038.5	49.1	-0.0378
2019-01-07 02:45:00	0	41	0	1038.3	49	-0.0378
2019-01-07 03:00:00	0	31	0	1038.3	49	-0.0378
2019-01-07 03:15:00	0	0	0	1038.1	49.1	-0.0378
2019-01-07 03:30:00	0	31	0	1038	48.8	-0.0378
2019-01-07 03:45:00	0	0	0	1037.7	48.6	-0.0378
2019-01-07 04:00:00	0	0	0	1037.6	48.8	-0.0378
2019-01-07 04:15:00	0	0	0	1037.3	48.4	-0.0378
2019-01-07 04:30:00	0	0	0	1037.3	48.4	-0.0378
2019-01-07 04:45:00	0	0	0	1037.4	48.7	-0.0378
2019-01-07 05:00:00	0	0	0	1037.3	49.5	-0.0378
2019-01-07 05:15:00	0	0	0	1037.4	49.7	-0.0378
2019-01-07 05:30:00	0	0	0	1037.1	50	-0.0357
2019-01-07 05:45:00	0	0	0	1037.4	49.8	-0.0378
2019-01-07 06:00:00	0	0	0	1037.2	49.4	-0.0378
2019-01-07 06:15:00	0	0	0	1037.2	49.4	-0.0378
2019-01-07 06:30:00	0	38	0	1037.1	49.7	-0.0378
2019-01-07 06:45:00	0	0	0	1037.4	50.1	-0.0378
2019-01-07 07:00:00	0	0	0	1037.5	49.8	-0.0378
2019-01-07 07:15:00	0	0	0	1037.5	49.7	-0.0378
2019-01-07 07:30:00	41	0	0	1037.6	47.3	-0.0378
2019-01-07 07:45:00	111	0	0	1037.7	45.6	-0.0147
2019-01-07 08:00:00	213	34	0	1037.7	44.3	0.0618135
2019-01-07 08:15:00	350	0	0	1037.9	43.2	0.157731
2019-01-07 08:30:00	441	0	33	1038.4	42	0.24086
2019-01-07 08:45:00	506	0	35	1038.4	39.4	0.4263
2019-01-07 09:00:00	593	37	0	1038.5	35.9	0.32612
2019-01-07 09:15:00	654	0	36	1038.6	33.7	0.500903
2019-01-07 09:30:00	710	0	37	1038.6	32	0.607478
2019-01-07 09:45:00	755	0	41	1038.6	31.3	0.547795
2019-01-07 10:00:00	801	0	43	1038.4	29.9	0.697001
2019-01-07 10:15:00	835	0	44	1038	29.7	0.637319
2019-01-07 10:30:00	862	0	45	1037.8	29.2	0.93786
2019-01-07 10:45:00	865	35	57	1037.5	31.9	1.42384
2019-01-07 11:00:00	890	0	57	1037.3	31.2	1.39613
2019-01-07 11:15:00	911	0	50	1036.8	30.1	0.867521
2019-01-07 11:30:00	921	0	50	1036.6	31.4	1.28529
2019-01-07 11:45:00	930	0	51	1036	31.8	1.11691
2019-01-07 12:00:00	942	0	50	1035.7	31.9	1.22561
2019-01-07 12:15:00	941	0	51	1035.4	30.6	1.06788
2019-01-07 12:30:00	945	0	50	1035.1	29.6	0.652239
2019-01-07 12:45:00	941	47	50	1034.8	29.4	0.464667
2019-01-07 13:00:00	923	0	49	1034.7	28.7	0.347434
2019-01-07 13:15:00	908	0	51	1034.5	29.4	0.313331
2019-01-07 13:30:00	887	0	52	1034.4	28.2	0.242991
2019-01-07 13:45:00	849	0	53	1034.3	29.2	0.347434
2019-01-07 14:00:00	823	0	51	1033.9	27.1	0.285621
2019-01-07 14:15:00	766	0	51	1034	27.4	0.153468
2019-01-07 14:30:00	727	0	50	1034	27.1	0.202492
2019-01-07 14:45:00	681	45	46	1033.9	27.5	0.142811
2019-01-07 15:00:00	631	0	46	1033.8	27.4	0.0916545
2019-01-07 15:15:00	565	0	46	1033.9	27.1	0.0575505
2019-01-07 15:30:00	480	0	44	1033.8	28.7	0.029841
2019-01-07 15:45:00	414	42	40	1033.8	27.4	0.029841
2019-01-07 16:00:00	336	37	38	1033.8	27.8	0.021315
2019-01-07 16:15:00	250	0	32	1033.9	28.4	0.0063945
2019-01-07 16:30:00	155	0	0	1034.1	28.8	-0.021
2019-01-07 16:45:00	62	0	0	1034	28	-0.0441
2019-01-07 17:00:00	0	0	0	1034.1	28.2	-0.0357
2019-01-07 17:15:00	0	39	0	1034.2	29.2	-0.0378
2019-01-07 17:30:00	0	40	0	1034.2	30.7	-0.0378
2019-01-07 17:45:00	0	0	0	1034.4	31.6	-0.0378
2019-01-07 18:00:00	0	0	0	1034.5	32.5	-0.0378
2019-01-07 18:15:00	0	31	0	1034.5	33.3	-0.0378
2019-01-07 18:30:00	0	0	0	1034.6	37	-0.0378
2019-01-07 18:45:00	0	0	0	1034.5	39.7	-0.0378
2019-01-07 19:00:00	0	30	0	1034.4	41.4	-0.0378
2019-01-07 19:15:00	0	0	0	1034.4	42.5	-0.0378
2019-01-07 19:30:00	0	42	0	1034.4	46.1	-0.0378
2019-01-07 19:45:00	0	0	0	1034.4	45.7	-0.0378
2019-01-07 20:00:00	0	0	0	1034.4	43.5	-0.0378
2019-01-07 20:15:00	0	0	0	1034.2	43.4	-0.0378
2019-01-07 20:30:00	0	0	0	1034.2	46.5	-0.0378
2019-01-07 20:45:00	0	0	0	1034.2	49.6	-0.0378
2019-01-07 21:00:00	0	0	0	1034.2	49.7	-0.0378
2019-01-07 21:15:00	0	0	0	1033.9	47.8	-0.0378
2019-01-07 21:30:00	0	0	0	1034	46	-0.0378
2019-01-07 21:45:00	0	0	0	1033.8	45.1	-0.0378
2019-01-07 22:00:00	0	30	0	1033.5	45.2	-0.0378
2019-01-07 22:15:00	0	0	0	1033.4	44.7	-0.0378
2019-01-07 22:30:00	0	0	0	1033.5	47.9	-0.0378
2019-01-07 22:45:00	0	0	0	1033.5	48.1	-0.0378
2019-01-07 23:00:00	0	0	0	1033.4	50.3	-0.0378
2019-01-07 23:15:00	0	42	0	1033.3	48.3	-0.0378
2019-01-07 23:30:00	0	0	0	1033.3	48.5	-0.0378
2019-01-07 23:45:00	0	34	0	1033.3	48.6	-0.0378
2019-01-08	0	0	0	1033.1	49.4	-0.0378
2019-01-08 00:15:00	0	0	0	1033	49.9	-0.0378
2019-01-08 00:30:00	0	0	0	1032.9	47.7	-0.0357
2019-01-08 00:45:00	0	0	0	1032.7	48.5	-0.0378
2019-01-08 01:00:00	0	0	0	1032.8	47.4	-0.0378
2019-01-08 01:15:00	0	0	0	1032.6	46.6	-0.0378
2019-01-08 01:30:00	0	0	0	1032.7	46.5	-0.0378
2019-01-08 01:45:00	0	0	0	1032.7	49.8	-0.0378
2019-01-08 02:00:00	0	0	0	1032.6	51.8	-0.0378
2019-01-08 02:15:00	0	0	0	1032.5	52.5	-0.0378
2019-01-08 02:30:00	0	0	0	1032.7	54.4	-0.0378
2019-01-08 02:45:00	0	47	0	1032.6	52	-0.0378
2019-01-08 03:00:00	0	35	0	1032.4	54.9	-0.0378
2019-01-08 03:15:00	0	43	0	1032.1	55.1	-0.0378
2019-01-08 03:30:00	0	0	0	1031.8	55.9	-0.0378
2019-01-08 03:45:00	0	0	0	1031.9	53.9	-0.0378
2019-01-08 04:00:00	0	0	0	1031.8	54.2	-0.0378
2019-01-08 04:15:00	0	0	0	1031.7	55	-0.0378
2019-01-08 04:30:00	0	0	0	1031.5	55.3	-0.0378
2019-01-08 04:45:00	0	0	0	1031.4	56.3	-0.0378
2019-01-08 05:00:00	0	46	0	1031.2	56.3	-0.0378
2019-01-08 05:15:00	0	0	0	1031	56	-0.0378
2019-01-08 05:30:00	0	0	0	1031	56.2	-0.0378
2019-01-08 05:45:00	0	0	0	1031	56.7	-0.0378
2019-01-08 06:00:00	0	0	0	1031.1	56.1	-0.0378
2019-01-08 06:15:00	0	0	0	1030.9	56.4	-0.0378
2019-01-08 06:30:00	0	32	0	1031.1	56.9	-0.0378
2019-01-08 06:45:00	0	0	0	1031.2	55.4	-0.0378
2019-01-08 07:00:00	0	0	0	1031.1	55	-0.0378
2019-01-08 07:15:00	0	40	0	1031.1	54.8	-0.0378
2019-01-08 07:30:00	0	0	0	1031	56.4	-0.0021
2019-01-08 07:45:00	72	0	0	1031.3	55	0.08526
2019-01-08 08:00:00	216	0	31	1031.2	54.4	0.490245
2019-01-08 08:15:00	296	0	37	1031.6	53	0.786524
2019-01-08 08:30:00	390	32	43	1031.8	52.1	1.07001
2019-01-08 08:45:00	453	0	48	1031.8	50.3	1.48139
2019-01-08 09:00:00	521	0	51	1031.9	48.3	2.1656
2019-01-08 09:15:00	582	0	53	1031.8	44.4	2.81145
2019-01-08 09:30:00	636	0	55	1032.1	43.2	3.47861
2019-01-08 09:45:00	702	0	55	1031.9	41	4.82785
2019-01-08 10:00:00	743	0	56	1031.7	40.7	11.9428
2019-01-08 10:15:00	780	45	56	1031.7	37.9	18.333
2019-01-08 10:30:00	808	0	59	1031.5	35.6	21.2788
2019-01-08 10:45:00	831	0	68	1031.4	35.7	23.4508
2019-01-08 11:00:00	854	0	71	1031	35.1	24.8639
2019-01-08 11:15:00	873	0	65	1030.8	34.3	25.7826
2019-01-08 11:30:00	883	0	61	1030.6	33.8	26.5691
2019-01-08 11:45:00	893	0	61	1030.1	32.3	27.1319
2019-01-08 12:00:00	910	0	60	1029.8	31.9	27.2065
2019-01-08 12:15:00	925	0	59	1029.6	31.3	27.2832
2019-01-08 12:30:00	894	33	65	1029.4	31.7	27.0871
2019-01-08 12:45:00	899	0	66	1029.2	29.5	26.6054
2019-01-08 13:00:00	889	31	65	1029	29.6	26.1919
2019-01-08 13:15:00	883	0	60	1028.9	28.9	25.286
2019-01-08 13:30:00	861	0	58	1028.7	29	24.7105
2019-01-08 13:45:00	851	0	50	1028.6	29.5	23.9431
2019-01-08 14:00:00	805	0	55	1028.3	30	22.7303
2019-01-08 14:15:00	770	0	52	1028.6	29.5	21.8948
2019-01-08 14:30:00	731	0	35	1028.5	31	20.5903
2019-01-08 14:45:00	682	34	38	1028.6	29.6	19.0663
2019-01-08 15:00:00	625	0	43	1028.5	30.2	17.4335
2019-01-08 15:15:00	551	0	44	1028.6	31.2	15.4448
2019-01-08 15:30:00	478	0	43	1028.5	33	12.8636
2019-01-08 15:45:00	390	0	43	1028.5	32.6	4.19479
2019-01-08 16:00:00	311	0	40	1028.7	36.8	3.03952
2019-01-08 16:15:00	237	34	31	1028.6	37.5	3.38482
2019-01-08 16:30:00	147	0	0	1028.7	38	1.8203
2019-01-08 16:45:00	59	33	0	1028.9	39.9	0.547795
2019-01-08 17:00:00	0	0	0	1028.9	42.6	0.072471
2019-01-08 17:15:00	0	0	0	1029	44	-0.0525
2019-01-08 17:30:00	0	0	0	1029.3	45.5	-0.0378
2019-01-08 17:45:00	0	45	0	1029.3	45.8	-0.0378
2019-01-08 18:00:00	0	43	0	1029.3	47.2	-0.0378
2019-01-08 18:15:00	0	0	0	1029.4	47.5	-0.0378
2019-01-08 18:30:00	0	0	0	1029.4	49.1	-0.0378
2019-01-08 18:45:00	0	0	0	1029.4	48.2	-0.0378
2019-01-08 19:00:00	0	0	0	1029.4	47.1	-0.0378
2019-01-08 19:15:00	0	0	0	1029.3	50.2	-0.0378
2019-01-08 19:30:00	0	0	0	1029.2	54.5	-0.0378
2019-01-08 19:45:00	0	0	0	1029	54.3	-0.0378
2019-01-08 20:00:00	0	43	0	1029.1	53.9	-0.0378
2019-01-08 20:15:00	0	0	0	1029	55.7	-0.0378
2019-01-08 20:30:00	0	47	0	1029	55.2	-0.0378
2019-01-08 20:45:00	0	0	0	1029.1	56.2	-0.0378
2019-01-08 21:00:00	0	42	0	1029	55.9	-0.0378
2019-01-08 21:15:00	0	0	0	1029	54.3	-0.0378
2019-01-08 21:30:00	0	0	0	1029.1	54.3	-0.0378
2019-01-08 21:45:00	0	0	0	1029	55.8	-0.0378
2019-01-08 22:00:00	0	0	0	1028.8	53.8	-0.0357
2019-01-08 22:15:00	0	0	0	1028.6	52.5	-0.0378
2019-01-08 22:30:00	0	0	0	1028.4	49.9	-0.0378
2019-01-08 22:45:00	0	0	0	1028.5	49.4	-0.0378
2019-01-08 23:00:00	0	0	0	1028.3	54	-0.0378
2019-01-08 23:15:00	0	0	0	1028.2	52.3	-0.0378
2019-01-08 23:30:00	0	0	0	1028.4	51.2	-0.0378
2019-01-08 23:45:00	0	31	0	1028.3	53.2	-0.0378
2019-01-09	0	0	0	1028.3	53.7	-0.0378
2019-01-09 00:15:00	0	52	0	1028.2	53.4	-0.0357
2019-01-09 00:30:00	0	49	0	1028.3	51.2	-0.0357
2019-01-09 00:45:00	0	0	0	1028.2	51.9	-0.0378
2019-01-09 01:00:00	0	0	0	1028.2	50.9	-0.0378
2019-01-09 01:15:00	0	0	0	1028.2	50.8	-0.0378
2019-01-09 01:30:00	0	0	0	1028.3	50.5	-0.0378
2019-01-09 01:45:00	0	0	0	1028.5	51.3	-0.0378
2019-01-09 02:00:00	0	0	0	1028.6	49.6	-0.0378
2019-01-09 02:15:00	0	49	0	1028.8	50.9	-0.0378
2019-01-09 02:30:00	0	0	0	1028.7	51.2	-0.0378
2019-01-09 02:45:00	0	44	0	1028.7	51.6	-0.0378
2019-01-09 03:00:00	0	0	0	1028.5	50.8	-0.0378
2019-01-09 03:15:00	0	0	0	1028.5	50.3	-0.0378
2019-01-09 03:30:00	0	0	0	1028.5	49.3	-0.0378
2019-01-09 03:45:00	0	0	0	1028.3	49.6	-0.0378
2019-01-09 04:00:00	0	0	0	1028.3	50.4	-0.0378
2019-01-09 04:15:00	0	0	0	1028.2	51	-0.0378
2019-01-09 04:30:00	0	0	0	1028.3	54.7	-0.0378
2019-01-09 04:45:00	0	0	0	1028.2	55.2	-0.0378
2019-01-09 05:00:00	0	0	0	1028.3	54.1	-0.0378
2019-01-09 05:15:00	0	0	0	1028.4	53.7	-0.0378
2019-01-09 05:30:00	0	37	0	1028.5	55.1	-0.0378
2019-01-09 05:45:00	0	46	0	1028.4	54.6	-0.0378
2019-01-09 06:00:00	0	0	0	1028.5	54.7	-0.0357
2019-01-09 06:15:00	0	54	0	1028.5	56	-0.0378
2019-01-09 06:30:00	0	0	0	1028.6	55.4	-0.0378
2019-01-09 06:45:00	0	0	0	1028.8	54.7	-0.0378
2019-01-09 07:00:00	0	0	0	1028.8	54.5	-0.0378
2019-01-09 07:15:00	0	0	0	1029	54.9	-0.0084
2019-01-09 07:30:00	38	53	0	1029.1	55	0.24086
2019-01-09 07:45:00	96	40	0	1029.2	54.1	0.720447
2019-01-09 08:00:00	243	0	0	1029.6	51.4	1.53255
2019-01-09 08:15:00	338	0	0	1029.8	50.2	2.6324
2019-01-09 08:30:00	419	0	33	1030.2	48.3	3.78341
2019-01-09 08:45:00	493	0	36	1030.5	47.1	5.35859
2019-01-09 09:00:00	558	0	38	1030.5	46.1	11.7595
2019-01-09 09:15:00	613	0	38	1030.5	43.6	14.0722
2019-01-09 09:30:00	663	0	42	1030.8	42.9	15.5024
2019-01-09 09:45:00	711	0	45	1031	40	17.457
2019-01-09 10:00:00	761	0	46	1031.1	39.1	18.8489
2019-01-09 10:15:00	798	0	47	1031.1	38.2	20.2471
2019-01-09 10:30:00	825	36	51	1031.3	38.4	21.3683
2019-01-09 10:45:00	844	0	59	1031.1	38.6	22.3317
2019-01-09 11:00:00	862	38	46	1031	39.1	23.2334
2019-01-09 11:15:00	874	41	51	1030.6	36.9	23.8856
2019-01-09 11:30:00	893	0	60	1030.4	37	24.2522
2019-01-09 11:45:00	907	0	58	1030	34.4	24.2586
2019-01-09 12:00:00	914	0	58	1030	33.1	24.1947
2019-01-09 12:15:00	915	0	58	1029.8	32.2	23.4252
2019-01-09 12:30:00	924	0	56	1029.4	33.4	24.0497
2019-01-09 12:45:00	911	32	56	1029.3	31.5	23.212
2019-01-09 13:00:00	904	0	56	1029.2	31.7	22.4831
2019-01-09 13:15:00	894	33	56	1029	32	18.9469
2019-01-09 13:30:00	864	0	56	1028.8	31.3	20.3388
2019-01-09 13:45:00	843	0	55	1028.6	30.9	19.8954
2019-01-09 14:00:00	797	0	56	1028.4	30.5	18.3778
2019-01-09 14:15:00	750	0	54	1028.3	31.2	16.3124
2019-01-09 14:30:00	700	0	54	1028.2	30.9	13.6459
2019-01-09 14:45:00	638	0	54	1028.2	30.8	11.4781
2019-01-09 15:00:00	586	0	51	1028.1	29.4	11.9833
2019-01-09 15:15:00	538	0	48	1028	29.2	8.59847
2019-01-09 15:30:00	471	0	45	1027.9	29.6	6.85064
2019-01-09 15:45:00	393	36	41	1027.8	29.8	3.35924
2019-01-09 16:00:00	319	0	37	1027.7	30.2	2.55567
2019-01-09 16:15:00	235	46	32	1027.7	32.5	1.73291
2019-01-09 16:30:00	141	0	0	1027.7	33.9	0.669291
2019-01-09 16:45:00	57	0	0	1027.6	37.4	0.443352
2019-01-09 17:00:00	0	41	0	1027.7	39.3	0.11297
2019-01-09 17:15:00	0	0	0	1027.8	39.7	-0.0483
2019-01-09 17:30:00	0	33	0	1027.8	40.8	-0.0378
2019-01-09 17:45:00	0	42	0	1027.8	41.8	-0.0378
2019-01-09 18:00:00	0	0	0	1028	44	-0.0378
2019-01-09 18:15:00	0	0	0	1028.2	41	-0.0378
2019-01-09 18:30:00	0	0	0	1028.2	42.8	-0.0378
2019-01-09 18:45:00	0	0	0	1028.1	44.7	-0.0378
2019-01-09 19:00:00	0	0	0	1028.3	43.7	-0.0378
2019-01-09 19:15:00	0	0	0	1028.2	45.6	-0.0378
2019-01-09 19:30:00	0	32	0	1028.2	46.2	-0.0378
2019-01-09 19:45:00	0	0	0	1028.2	45.2	-0.0378
2019-01-09 20:00:00	0	0	0	1028.4	42.2	-0.0378
2019-01-09 20:15:00	0	34	0	1028.2	41.5	-0.0378
2019-01-09 20:30:00	0	43	0	1028.2	49.7	-0.0378
2019-01-09 20:45:00	0	41	0	1028.3	47.3	-0.0378
2019-01-09 21:00:00	0	0	0	1028.4	47.6	-0.0378
2019-01-09 21:15:00	0	0	0	1028.6	52.3	-0.0378
2019-01-09 21:30:00	0	38	0	1028.6	56.8	-0.0378
2019-01-09 21:45:00	0	0	0	1028.7	53.8	-0.0378
2019-01-09 22:00:00	0	0	0	1028.7	56.2	-0.0378
2019-01-09 22:15:00	0	0	0	1028.8	55.6	-0.0378
2019-01-09 22:30:00	0	47	0	1028.7	55.6	-0.0378
2019-01-09 22:45:00	0	48	0	1028.8	55.7	-0.0378
2019-01-09 23:00:00	0	0	0	1028.6	54.8	-0.0378
2019-01-09 23:15:00	0	35	0	1028.6	54	-0.0378
2019-01-09 23:30:00	0	0	0	1028.5	52.6	-0.0378
2019-01-09 23:45:00	0	34	0	1028.3	53	-0.0378
2019-01-10	0	40	0	1028.2	52.7	-0.0378
2019-01-10 00:15:00	0	0	0	1028.3	54.1	-0.0378
2019-01-10 00:30:00	0	35	0	1028.1	53.5	-0.0378
2019-01-10 00:45:00	0	0	0	1028.2	53.3	-0.0378
2019-01-10 01:00:00	0	0	0	1028.3	54.1	-0.0378
2019-01-10 01:15:00	0	0	0	1028.3	54.5	-0.0378
2019-01-10 01:30:00	0	0	0	1028.5	54.3	-0.0378
2019-01-10 01:45:00	0	0	0	1028.4	52.8	-0.0378
2019-01-10 02:00:00	0	0	0	1028.5	50.7	-0.0378
2019-01-10 02:15:00	0	0	0	1028.4	51.1	-0.0378
2019-01-10 02:30:00	0	0	0	1028.5	52.6	-0.0378
2019-01-10 02:45:00	0	0	0	1028.6	52.9	-0.0378
2019-01-10 03:00:00	0	0	0	1028.5	51.3	-0.0378
2019-01-10 03:15:00	0	49	0	1028.5	51	-0.0378
2019-01-10 03:30:00	0	0	0	1028.4	49	-0.0378
2019-01-10 03:45:00	0	35	0	1028.5	48.8	-0.0378
2019-01-10 04:00:00	0	0	0	1028.4	49.6	-0.0378
2019-01-10 04:15:00	0	31	0	1028.5	50	-0.0378
2019-01-10 04:30:00	0	43	0	1028.5	50.6	-0.0378
2019-01-10 04:45:00	0	0	0	1028.9	47.5	-0.0378
2019-01-10 05:00:00	0	0	0	1029.1	50.8	-0.0378
2019-01-10 05:15:00	0	0	0	1028.9	49.6	-0.0378
2019-01-10 05:30:00	0	0	0	1029	49.3	-0.0378
2019-01-10 05:45:00	0	0	0	1029	51.1	-0.0378
2019-01-10 06:00:00	0	0	0	1029	51.6	-0.0378
2019-01-10 06:15:00	0	0	0	1028.7	54.2	-0.0378
2019-01-10 06:30:00	0	46	0	1028.9	55.8	-0.0378
2019-01-10 06:45:00	0	0	0	1028.7	57	-0.0378
2019-01-10 07:00:00	0	0	0	1028.7	56.3	-0.0378
2019-01-10 07:15:00	0	0	0	1029.1	55.8	0.012789
2019-01-10 07:30:00	0	48	0	1029.2	56.3	0.32612
2019-01-10 07:45:00	105	0	0	1029.4	56.4	0.959175
2019-01-10 08:00:00	233	0	0	1029.6	56.7	2.11658
2019-01-10 08:15:00	343	0	0	1030.1	55.1	3.26759
2019-01-10 08:30:00	431	0	30	1030.4	52.3	4.28432
2019-01-10 08:45:00	503	34	31	1030.9	50.2	5.8126
2019-01-10 09:00:00	569	0	32	1031.2	49	12.2178
2019-01-10 09:15:00	626	0	33	1031.4	48.6	14.5134
2019-01-10 09:30:00	678	0	30	1031.5	48.4	16.3571
2019-01-10 09:45:00	735	41	34	1031.8	49	18.0048
2019-01-10 10:00:00	777	0	0	1032.1	48	19.1537
2019-01-10 10:15:00	811	49	39	1032.1	47.5	20.456
2019-01-10 10:30:00	842	0	41	1032	47.4	21.6965
2019-01-10 10:45:00	871	0	42	1032.2	46.5	22.4127
2019-01-10 11:00:00	880	44	0	1032.4	45.6	23.1289
2019-01-10 11:15:00	889	48	47	1032.3	45.3	18.2509
2019-01-10 11:30:00	910	35	44	1032.3	44.3	20.3166
2019-01-10 11:45:00	923	35	0	1032.1	45	16.2886
2019-01-10 12:00:00	906	38	54	1031.8	44.7	20.036
2019-01-10 12:15:00	862	45	60	1031.8	44.4	19.8408
2019-01-10 12:30:00	878	50	61	1031.6	42.3	8.96651
2019-01-10 12:45:00	939	0	50	1031.2	42.4	7.31744
2019-01-10 13:00:00	840	0	61	1031.3	42.3	8.89262
2019-01-10 13:15:00	913	0	49	1031.1	41.2	7.6329
2019-01-10 13:30:00	893	43	0	1031.1	40.9	6.7803
2019-01-10 13:45:00	867	0	44	1031	41.6	5.02395
2019-01-10 14:00:00	813	0	50	1031	41.1	12.0579
2019-01-10 14:15:00	786	0	43	1030.9	41.1	13.6288
2019-01-10 14:30:00	683	0	41	1031.1	40	14.0402
2019-01-10 14:45:00	693	42	40	1030.9	39.9	12.7357
2019-01-10 15:00:00	637	0	37	1031	40.2	11.1669
2019-01-10 15:15:00	592	0	38	1031	38.6	9.48731
2019-01-10 15:30:00	522	37	41	1031.3	39.7	7.2812
2019-01-10 15:45:00	449	35	43	1031.2	39.1	3.75997
2019-01-10 16:00:00	368	0	32	1031.5	39.3	3.4104
2019-01-10 16:15:00	293	0	0	1031.6	39.3	2.06542
2019-01-10 16:30:00	66	0	0	1031.4	40.6	1.40679
2019-01-10 16:45:00	0	0	0	1031.4	41.9	0.530744
2019-01-10 17:00:00	0	37	0	1031.6	44	0.0660765
2019-01-10 17:15:00	0	32	0	1031.8	47	-0.0483
2019-01-10 17:30:00	0	0	0	1031.8	47.3	-0.0378
2019-01-10 17:45:00	0	0	0	1031.7	47.6	-0.0378
2019-01-10 18:00:00	0	0	0	1031.6	43.3	-0.0378
2019-01-10 18:15:00	0	0	0	1032	44.4	-0.0378
2019-01-10 18:30:00	0	0	0	1032.3	45.6	-0.0378
2019-01-10 18:45:00	0	0	0	1032.1	47.8	-0.0378
2019-01-10 19:00:00	0	0	0	1032.2	49.7	-0.0378
2019-01-10 19:15:00	0	46	0	1032.1	51	-0.0378
2019-01-10 19:30:00	0	44	0	1031.9	49.4	-0.0378
2019-01-10 19:45:00	0	0	0	1031.9	49.3	-0.0378
2019-01-10 20:00:00	0	0	0	1031.8	55.6	-0.0378
2019-01-10 20:15:00	0	46	0	1032.1	55.8	-0.0378
2019-01-10 20:30:00	0	0	0	1032	56	-0.0378
2019-01-10 20:45:00	0	0	0	1031.9	55.1	-0.0378
2019-01-10 21:00:00	0	55	0	1032	54.7	-0.0378
2019-01-10 21:15:00	0	0	0	1032.2	55.3	-0.0378
2019-01-10 21:30:00	0	58	0	1032.4	56.9	-0.0378
2019-01-10 21:45:00	0	0	0	1032.5	58.1	-0.0378
2019-01-10 22:00:00	0	73	0	1032.6	57.8	-0.0378
2019-01-10 22:15:00	0	0	0	1032.4	59.1	-0.0378
2019-01-10 22:30:00	0	0	0	1032.2	56.6	-0.0378
2019-01-10 22:45:00	0	0	0	1032.5	56.1	-0.0378
2019-01-10 23:00:00	0	0	0	1032.4	56.5	-0.0378
2019-01-10 23:15:00	0	0	0	1032.3	57.2	-0.0378
2019-01-10 23:30:00	0	0	0	1032.2	56.5	-0.0378
2019-01-10 23:45:00	0	51	0	1032.1	56.7	-0.0378
2019-01-11	0	0	0	1031.7	56.3	-0.0378
2019-01-11 00:15:00	0	66	0	1031.9	56.1	-0.0357
2019-01-11 00:30:00	0	67	0	1031.7	56.6	-0.0378
2019-01-11 00:45:00	0	33	0	1031.6	56.5	-0.0378
2019-01-11 01:00:00	0	0	0	1031.6	57.1	-0.0378
2019-01-11 01:15:00	0	0	0	1031.4	57.3	-0.0378
2019-01-11 01:30:00	0	0	0	1031.4	58.1	-0.0378
2019-01-11 01:45:00	0	0	0	1031.1	58.3	-0.0378
2019-01-11 02:00:00	0	0	0	1031.1	58.2	-0.0378
2019-01-11 02:15:00	0	41	0	1031.1	58.4	-0.0378
2019-01-11 02:30:00	0	0	0	1031.1	58.9	-0.0378
2019-01-11 02:45:00	0	32	0	1031	59.1	-0.0378
2019-01-11 03:00:00	0	0	0	1030.8	58.7	-0.0357
2019-01-11 03:15:00	0	53	0	1030.5	59.1	-0.0378
2019-01-11 03:30:00	0	0	0	1030.1	59	-0.0378
2019-01-11 03:45:00	0	0	0	1029.9	58.9	-0.0378
2019-01-11 04:00:00	0	0	0	1029.6	59.4	-0.0378
2019-01-11 04:15:00	0	0	0	1029.5	59.3	-0.0378
2019-01-11 04:30:00	0	0	0	1029.5	59.9	-0.0378
2019-01-11 04:45:00	0	0	0	1029.3	59.9	-0.0378
2019-01-11 05:00:00	0	0	0	1029.1	59.3	-0.0378
2019-01-11 05:15:00	0	0	0	1029.2	59.2	-0.0378
2019-01-11 05:30:00	0	0	0	1029	60.2	-0.0378
2019-01-11 05:45:00	0	35	0	1028.9	60.7	-0.0378
2019-01-11 06:00:00	0	0	0	1028.8	60.5	-0.0378
2019-01-11 06:15:00	0	0	0	1028.7	60.4	-0.0378
2019-01-11 06:30:00	0	0	0	1028.5	60.7	-0.0378
2019-01-11 06:45:00	0	47	0	1028.5	60.7	-0.0378
2019-01-11 07:00:00	0	0	0	1028.4	60.5	-0.0378
2019-01-11 07:15:00	0	0	0	1028.2	59.9	0.021315
2019-01-11 07:30:00	0	43	0	1028.1	59.7	0.191835
2019-01-11 07:45:00	0	0	0	1028	59.2	0.856863
2019-01-11 08:00:00	0	34	30	1028	58.8	1.73504
2019-01-11 08:15:00	43	0	33	1028	59.7	1.24053
2019-01-11 08:30:00	123	71	40	1028.1	60.3	0.839811
2019-01-11 08:45:00	347	0	59	1028.3	60.1	2.06329
2019-01-11 09:00:00	433	0	86	1028.5	57.6	4.62962
2019-01-11 09:15:00	256	0	121	1028.6	55.5	4.77243
2019-01-11 09:30:00	559	30	84	1028.6	54.6	10.4444
2019-01-11 09:45:00	643	0	152	1028.5	53.7	11.3396
2019-01-11 10:00:00	621	0	134	1028.5	52.2	5.47156
2019-01-11 10:15:00	684	0	118	1028.4	50.4	5.56321
2019-01-11 10:30:00	609	0	160	1028.2	48.2	7.3686
2019-01-11 10:45:00	476	0	262	1028	46.8	7.66914
2019-01-11 11:00:00	525	0	188	1027.7	47.2	8.42795
2019-01-11 11:15:00	748	0	114	1027.3	46.5	10.7428
2019-01-11 11:30:00	781	0	112	1027	44.3	8.18283
2019-01-11 11:45:00	786	0	141	1026.9	40.6	5.79342
2019-01-11 12:00:00	809	0	146	1026.5	37.6	5.0005
2019-01-11 12:15:00	702	0	154	1026.2	37.2	6.57994
2019-01-11 12:30:00	428	0	158	1025.9	38.5	6.36253
2019-01-11 12:45:00	613	0	230	1025.6	36.7	7.07019
2019-01-11 13:00:00	372	39	255	1025.3	36.9	8.37253
2019-01-11 13:15:00	474	0	186	1024.9	37.9	6.51813
2019-01-11 13:30:00	540	0	189	1025	37.2	6.22824
2019-01-11 13:45:00	262	0	161	1024.8	37.7	5.38204
2019-01-11 14:00:00	357	0	230	1024.6	36.7	5.72947
2019-01-11 14:15:00	249	36	212	1024.6	38.3	4.76817
2019-01-11 14:30:00	169	0	145	1024.5	37.1	4.05838
2019-01-11 14:45:00	152	30	107	1024.4	42.4	4.67438
2019-01-11 15:00:00	451	0	156	1024.3	42.1	4.07969
2019-01-11 15:15:00	172	32	101	1024.2	42.4	5.19447
2019-01-11 15:30:00	253	0	86	1024.4	41.7	6.21332
2019-01-11 15:45:00	220	0	65	1024.3	41	5.15823
2019-01-11 16:00:00	170	0	56	1024.3	39.9	4.54862
2019-01-11 16:15:00	125	0	47	1024.4	41.6	1.95032
2019-01-11 16:30:00	73	0	34	1024.5	43.3	1.10199
2019-01-11 16:45:00	30	0	0	1024.5	45.1	0.447615
2019-01-11 17:00:00	0	47	0	1024.6	45.5	0.132153
2019-01-11 17:15:00	0	0	0	1024.5	47.1	-0.042
2019-01-11 17:30:00	0	40	0	1024.6	47.8	-0.0378
2019-01-11 17:45:00	0	0	0	1024.6	46.2	-0.0378
2019-01-11 18:00:00	0	0	0	1024.8	43.9	-0.0378
2019-01-11 18:15:00	0	0	0	1024.7	41.9	-0.0378
2019-01-11 18:30:00	0	40	0	1024.7	44	-0.0378
2019-01-11 18:45:00	0	0	0	1024.6	48.3	-0.0378
2019-01-11 19:00:00	0	0	0	1024.7	51.3	-0.0378
2019-01-11 19:15:00	0	42	0	1024.7	49.9	-0.0378
2019-01-11 19:30:00	0	0	0	1024.6	53.3	-0.0378
2019-01-11 19:45:00	0	91	0	1024.6	56.7	-0.0378
2019-01-11 20:00:00	0	0	0	1024.6	54.8	-0.0378
2019-01-11 20:15:00	0	31	0	1024.4	53	-0.0378
2019-01-11 20:30:00	0	51	0	1024.5	54	-0.0378
2019-01-11 20:45:00	0	31	0	1024.2	54.4	-0.0378
2019-01-11 21:00:00	0	0	0	1024.1	55.4	-0.0378
2019-01-11 21:15:00	0	0	0	1023.8	55.8	-0.0378
2019-01-11 21:30:00	0	0	0	1023.7	55.8	-0.0378
2019-01-11 21:45:00	0	0	0	1023.6	55.6	-0.0378
2019-01-11 22:00:00	0	0	0	1023.5	56.1	-0.0378
2019-01-11 22:15:00	0	0	0	1023.4	55.9	-0.0378
2019-01-11 22:30:00	0	0	0	1023.3	55.6	-0.0378
2019-01-11 22:45:00	0	0	0	1023	54.3	-0.0378
2019-01-11 23:00:00	0	48	0	1022.6	54.5	-0.0378
2019-01-11 23:15:00	0	57	0	1022.7	54.8	-0.0378
2019-01-11 23:30:00	0	0	0	1022.4	53.3	-0.0378
2019-01-11 23:45:00	0	0	0	1022.2	52.6	-0.0378
2019-01-12	0	0	0	1021.8	51.4	-0.0378
2019-01-12 00:15:00	0	0	0	1021.6	51.2	-0.0378
2019-01-12 00:30:00	0	0	0	1021.3	50.5	-0.0378
2019-01-12 00:45:00	0	33	0	1020.9	50	-0.0378
2019-01-12 01:00:00	0	0	0	1020.5	49.4	-0.0378
2019-01-12 01:15:00	0	0	0	1020.6	50.7	-0.0378
2019-01-12 01:30:00	0	39	0	1020.4	50.7	-0.0378
2019-01-12 01:45:00	0	0	0	1020.3	51.5	-0.0378
2019-01-12 02:00:00	0	0	0	1020.2	52.7	-0.0378
2019-01-12 02:15:00	0	0	0	1019.7	53.5	-0.0378
2019-01-12 02:30:00	0	0	0	1019.3	53.2	-0.0378
2019-01-12 02:45:00	0	31	0	1019.1	53.1	-0.0378
2019-01-12 03:00:00	0	36	0	1019.1	53.8	-0.0378
2019-01-12 03:15:00	0	0	0	1018.7	55.8	-0.0378
2019-01-12 03:30:00	0	0	0	1018.5	56.5	-0.0378
2019-01-12 03:45:00	0	0	0	1018.2	56.9	-0.0378
2019-01-12 04:00:00	0	47	0	1017.5	57.1	-0.0378
2019-01-12 04:15:00	0	0	0	1017.3	58	-0.0378
2019-01-12 04:30:00	0	0	0	1017	57.8	-0.0378
2019-01-12 04:45:00	0	53	0	1016.7	56.9	-0.0378
2019-01-12 05:00:00	0	0	0	1016.5	57.1	-0.0357
2019-01-12 05:15:00	0	0	0	1016.3	57.3	-0.0378
2019-01-12 05:30:00	0	36	0	1016	56.4	-0.0378
2019-01-12 05:45:00	0	48	0	1016	56.4	-0.0378
2019-01-12 06:00:00	0	31	0	1016	56.2	-0.0378
2019-01-12 06:15:00	0	0	0	1015.9	56.6	-0.0378
2019-01-12 06:30:00	0	0	0	1015.6	56.8	-0.0378
2019-01-12 06:45:00	0	0	0	1015.5	56.5	-0.0378
2019-01-12 07:00:00	0	0	0	1015.5	56.2	-0.0378
2019-01-12 07:15:00	0	0	0	1015.3	56.4	0.0063945
2019-01-12 07:30:00	0	45	0	1015.1	56.7	0.292015
2019-01-12 07:45:00	54	47	32	1015.1	56.9	0.878178
2019-01-12 08:00:00	105	31	50	1015.3	55.7	1.66044
2019-01-12 08:15:00	151	0	61	1015.2	54.8	2.52156
2019-01-12 08:30:00	210	0	79	1015.3	54.7	3.34646
2019-01-12 08:45:00	294	44	89	1015.4	53.7	7.27268
2019-01-12 09:00:00	364	0	100	1015.4	53.3	10.5126
2019-01-12 09:15:00	446	0	109	1015.4	52.1	11.1307
2019-01-12 09:30:00	481	39	126	1015.3	51.4	13.3858
2019-01-12 09:45:00	543	0	132	1015.1	50.3	14.5134
2019-01-12 10:00:00	569	0	143	1015.3	49.2	14.0338
2019-01-12 10:15:00	617	30	150	1015.2	48.5	17.0861
2019-01-12 10:30:00	657	0	156	1015.1	48.1	17.9749
2019-01-12 10:45:00	679	0	161	1014.8	49	19.4499
2019-01-12 11:00:00	701	0	175	1014.6	47.5	20.4219
2019-01-12 11:15:00	718	0	165	1014.3	44.9	20.5413
2019-01-12 11:30:00	745	0	166	1013.9	36.8	21.1296
2019-01-12 11:45:00	722	35	167	1013.4	34.2	20.2492
2019-01-12 12:00:00	765	0	174	1013	32.7	11.8597
2019-01-12 12:15:00	765	0	189	1012.9	31.5	13.689
2019-01-12 12:30:00	771	0	210	1012.8	30.3	21.5623
2019-01-12 12:45:00	770	45	189	1012.5	27.8	14.9227
2019-01-12 13:00:00	746	39	169	1012.4	28.7	17.9771
2019-01-12 13:15:00	733	37	163	1012	28.3	19.499
2019-01-12 13:30:00	706	0	162	1011.7	27.5	21.3193
2019-01-12 13:45:00	685	35	158	1011.4	26.8	13.8377
2019-01-12 14:00:00	652	42	154	1011.1	26.3	7.66934
2019-01-12 14:15:00	425	0	107	1011	26.2	7.36007
2019-01-12 14:30:00	511	0	131	1011.1	26.4	5.37351
2019-01-12 14:45:00	313	59	108	1011.2	27.9	5.81473
2019-01-12 15:00:00	397	0	120	1011.1	26.6	8.51747
2019-01-12 15:15:00	242	35	116	1011.1	28	5.00903
2019-01-12 15:30:00	307	0	100	1011	26.9	5.88507
2019-01-12 15:45:00	241	0	88	1010.8	27.8	3.72799
2019-01-12 16:00:00	181	0	76	1011.1	27.3	2.59404
2019-01-12 16:15:00	114	0	58	1011.2	27.9	1.52615
2019-01-12 16:30:00	60	40	38	1011.2	29	0.929334
2019-01-12 16:45:00	0	0	0	1011.2	29.7	0.400722
2019-01-12 17:00:00	0	0	0	1011.2	31.2	0.102312
2019-01-12 17:15:00	0	0	0	1011.3	31.8	-0.0441
2019-01-12 17:30:00	0	0	0	1011.4	32.8	-0.0378
2019-01-12 17:45:00	0	0	0	1011.4	32.5	-0.0378
2019-01-12 18:00:00	0	49	0	1011.4	33.9	-0.0378
2019-01-12 18:15:00	0	0	0	1011.5	33.8	-0.0357
2019-01-12 18:30:00	0	0	0	1011.6	39	-0.0378
2019-01-12 18:45:00	0	39	0	1011.6	42	-0.0378
2019-01-12 19:00:00	0	45	0	1011.7	41.3	-0.0378
2019-01-12 19:15:00	0	0	0	1011.7	45.6	-0.0378
2019-01-12 19:30:00	0	47	0	1011.6	45.5	-0.0378
2019-01-12 19:45:00	0	0	0	1011.5	47	-0.0378
2019-01-12 20:00:00	0	0	0	1011.7	46.7	-0.0378
2019-01-12 20:15:00	0	0	0	1011.7	50.2	-0.0378
2019-01-12 20:30:00	0	40	0	1011.8	51.5	-0.0378
2019-01-12 20:45:00	0	58	0	1011.6	51.1	-0.0378
2019-01-12 21:00:00	0	33	0	1011.4	51.1	-0.0378
2019-01-12 21:15:00	0	0	0	1011.3	50.4	-0.0357
2019-01-12 21:30:00	0	40	0	1011.1	51.4	-0.0378
2019-01-12 21:45:00	0	35	0	1011.1	51.3	-0.0378
2019-01-12 22:00:00	0	38	0	1010.8	49.7	-0.0378
2019-01-12 22:15:00	0	0	0	1010.7	49.9	-0.0357
2019-01-12 22:30:00	0	0	0	1010.5	49.7	-0.0378
2019-01-12 22:45:00	0	0	0	1010.4	49.4	-0.0378
2019-01-12 23:00:00	0	0	0	1010.4	49.4	-0.0357
2019-01-12 23:15:00	0	0	0	1010.2	49.3	-0.0378
2019-01-12 23:30:00	0	0	0	1009.9	49	-0.0378
2019-01-12 23:45:00	0	0	0	1009.8	48.1	-0.0357
2019-01-13	0	0	0	1009.5	49.6	-0.0357
2019-01-13 00:15:00	0	0	0	1009.5	49.2	-0.0378
2019-01-13 00:30:00	0	34	0	1009.1	48.4	-0.0378
2019-01-13 00:45:00	0	33	0	1009.2	48.2	-0.0357
2019-01-13 01:00:00	0	0	0	1008.9	48.2	-0.0378
2019-01-13 01:15:00	0	37	0	1008.8	48	-0.0357
2019-01-13 01:30:00	0	0	0	1008.8	49.6	-0.0378
2019-01-13 01:45:00	0	0	0	1008.9	48.5	-0.0378
2019-01-13 02:00:00	0	0	0	1008.9	49	-0.0378
2019-01-13 02:15:00	0	0	0	1008.9	50.3	-0.0378
2019-01-13 02:30:00	0	0	0	1008.8	50.3	-0.0378
2019-01-13 02:45:00	0	0	0	1008.6	50.7	-0.0378
2019-01-13 03:00:00	0	0	0	1008.7	51.1	-0.0357
2019-01-13 03:15:00	0	42	0	1008.7	53.2	-0.0378
2019-01-13 03:30:00	0	41	0	1008.5	54.8	-0.0378
2019-01-13 03:45:00	0	0	0	1008.5	55	-0.0378
2019-01-13 04:00:00	0	43	0	1008.6	55.6	-0.0378
2019-01-13 04:15:00	0	44	0	1008.6	55.9	-0.0378
2019-01-13 04:30:00	0	0	0	1008.7	55.2	-0.0378
2019-01-13 04:45:00	0	0	0	1008.9	55.1	-0.0378
2019-01-13 05:00:00	0	34	0	1009	55	-0.0378
2019-01-13 05:15:00	0	0	0	1009.4	55.5	-0.0378
2019-01-13 05:30:00	0	0	0	1009.3	54.9	-0.0378
2019-01-13 05:45:00	0	0	0	1009.5	56	-0.0378
2019-01-13 06:00:00	0	0	0	1009.9	53.7	-0.0378
2019-01-13 06:15:00	0	54	0	1010	54.4	-0.0378
2019-01-13 06:30:00	0	34	0	1010.3	52.4	-0.0378
2019-01-13 06:45:00	0	32	0	1010.6	51.1	-0.0357
2019-01-13 07:00:00	0	0	0	1010.9	51.4	-0.0378
2019-01-13 07:15:00	0	0	0	1011	51.6	-0.0105
2019-01-13 07:30:00	0	0	0	1011.3	53.4	0.168388
2019-01-13 07:45:00	0	63	0	1011.5	57.2	0.765208
2019-01-13 08:00:00	62	0	45	1011.8	57.1	1.47287
2019-01-13 08:15:00	108	0	64	1012.2	52.6	2.29563
2019-01-13 08:30:00	162	0	83	1012.5	53.5	3.12478
2019-01-13 08:45:00	221	0	98	1012.6	53.9	5.1966
2019-01-13 09:00:00	280	0	113	1013.4	53.5	7.30039
2019-01-13 09:15:00	343	0	128	1013.8	54.6	9.37647
2019-01-13 09:30:00	372	0	144	1013.9	53.2	10.5509
2019-01-13 09:45:00	462	0	158	1013.9	46.4	11.4739
2019-01-13 10:00:00	510	0	170	1014.3	47	13.1386
2019-01-13 10:15:00	553	0	177	1014.4	42	15.6665
2019-01-13 10:30:00	599	0	174	1014.6	39.4	17.6296
2019-01-13 10:45:00	639	0	176	1014.8	38.5	19.3604
2019-01-13 11:00:00	673	0	187	1015	33	17.2332
2019-01-13 11:15:00	691	0	185	1015.2	31.3	16.6918
2019-01-13 11:30:00	692	0	193	1015.1	32.9	16.2314
2019-01-13 11:45:00	699	49	190	1015.3	32.2	18.5952
2019-01-13 12:00:00	677	0	191	1015.6	32	19.8507
2019-01-13 12:15:00	707	0	193	1015.5	31.5	20.8503
2019-01-13 12:30:00	720	0	184	1015.6	33.1	17.8854
2019-01-13 12:45:00	720	0	177	1015.6	32.6	16.6534
2019-01-13 13:00:00	737	0	175	1015.3	33.1	10.7214
2019-01-13 13:15:00	730	0	167	1015.3	33.4	12.5929
2019-01-13 13:30:00	699	51	167	1015.7	33.9	8.81588
2019-01-13 13:45:00	671	41	163	1015.8	33.9	8.0187
2019-01-13 14:00:00	634	0	155	1015.9	36.1	6.33269
2019-01-13 14:15:00	600	0	146	1015.9	35.2	5.42893
2019-01-13 14:30:00	541	0	138	1016.3	36.2	5.66126
2019-01-13 14:45:00	494	33	128	1016.4	36.4	4.66372
2019-01-13 15:00:00	466	0	118	1016.4	36.8	3.43385
2019-01-13 15:15:00	405	58	106	1016.4	36.1	2.51943
2019-01-13 15:30:00	344	32	99	1016.6	40.1	2.25726
2019-01-13 15:45:00	277	31	86	1016.6	42.6	2.14216
2019-01-13 16:00:00	193	0	72	1016.7	41.5	1.93114
2019-01-13 16:15:00	131	37	58	1016.7	44	1.2448
2019-01-13 16:30:00	77	31	43	1016.7	44.8	0.611741
2019-01-13 16:45:00	31	51	0	1016.9	47.2	0.347434
2019-01-13 17:00:00	0	41	0	1016.9	49.8	0.076734
2019-01-13 17:15:00	0	36	0	1017	52.1	-0.0399
2019-01-13 17:30:00	0	0	0	1017.3	51.5	-0.0378
2019-01-13 17:45:00	0	0	0	1017.3	51.6	-0.0378
2019-01-13 18:00:00	0	0	0	1017.2	54.3	-0.0378
2019-01-13 18:15:00	0	69	0	1017.5	55.7	-0.0378
2019-01-13 18:30:00	0	0	0	1017.6	56.7	-0.0378
2019-01-13 18:45:00	0	0	0	1017.6	56.8	-0.0378
2019-01-13 19:00:00	0	56	0	1017.8	56.6	-0.0378
2019-01-13 19:15:00	0	74	0	1017.8	56.7	-0.0378
2019-01-13 19:30:00	0	0	0	1018.2	57	-0.0378
2019-01-13 19:45:00	0	48	0	1018.6	57.7	-0.0357
2019-01-13 20:00:00	0	33	0	1018.9	58.7	-0.0378
2019-01-13 20:15:00	0	0	0	1019.3	60.6	-0.0378
2019-01-13 20:30:00	0	34	0	1019.2	60.7	-0.0378
2019-01-13 20:45:00	0	0	0	1019.3	60.1	-0.0378
2019-01-13 21:00:00	0	0	0	1019.4	59.4	-0.0378
2019-01-13 21:15:00	0	0	0	1019.4	59.7	-0.0378
2019-01-13 21:30:00	0	0	0	1019.3	59.9	-0.0378
2019-01-13 21:45:00	0	0	0	1019.1	60.2	-0.0378
2019-01-13 22:00:00	0	0	0	1019.3	60.2	-0.0378
2019-01-13 22:15:00	0	0	0	1019.4	60.2	-0.0378
2019-01-13 22:30:00	0	0	0	1019.5	61.5	-0.0378
2019-01-13 22:45:00	0	0	0	1019.7	62.6	-0.0378
2019-01-13 23:00:00	0	0	0	1020.1	63.3	-0.0378
2019-01-13 23:15:00	0	0	0	1019.7	63.3	-0.0378
2019-01-13 23:30:00	0	0	0	1019.5	63.2	-0.0378
2019-01-13 23:45:00	0	0	0	1019.6	62.5	-0.0378
2019-01-14	0	0	0	1019.4	62.3	-0.0378
2019-01-14 00:15:00	0	0	0	1019.4	62.3	-0.0378
2019-01-14 00:30:00	0	0	0	1019.4	61.8	-0.0378
2019-01-14 00:45:00	0	0	0	1019.5	61.4	-0.0378
2019-01-14 01:00:00	0	0	0	1019.4	62.6	-0.0378
2019-01-14 01:15:00	0	0	0	1019.5	62.8	-0.0378
2019-01-14 01:30:00	0	0	0	1019.5	62.2	-0.0378
2019-01-14 01:45:00	0	0	0	1019.4	61.1	-0.0378
2019-01-14 02:00:00	0	0	0	1019.3	60.9	-0.0378
2019-01-14 02:15:00	0	0	0	1019.2	62.1	-0.0378
2019-01-14 02:30:00	0	0	0	1019	62.6	-0.0378
2019-01-14 02:45:00	0	0	0	1019	63.2	-0.0378
2019-01-14 03:00:00	0	0	0	1018.6	61.6	-0.0378
2019-01-14 03:15:00	0	0	0	1018.6	58.6	-0.0378
2019-01-14 03:30:00	0	0	0	1018.4	58.7	-0.0378
2019-01-14 03:45:00	0	0	0	1018.4	58	-0.0378
2019-01-14 04:00:00	0	0	0	1018.2	57.2	-0.0378
2019-01-14 04:15:00	0	0	0	1018.2	57.1	-0.0378
2019-01-14 04:30:00	0	0	0	1017.9	57.1	-0.0378
2019-01-14 04:45:00	0	37	0	1017.5	57.1	-0.0378
2019-01-14 05:00:00	0	57	0	1017.6	57.2	-0.0378
2019-01-14 05:15:00	0	0	0	1017.5	57.8	-0.0378
2019-01-14 05:30:00	0	0	0	1017.6	58.2	-0.0378
2019-01-14 05:45:00	0	0	0	1017.7	59	-0.0378
2019-01-14 06:00:00	0	0	0	1017.5	59.3	-0.0378
2019-01-14 06:15:00	0	0	0	1017.6	59.1	-0.0378
2019-01-14 06:30:00	0	0	0	1017.4	59.4	-0.0378
2019-01-14 06:45:00	0	0	0	1017.5	59.6	-0.0378
2019-01-14 07:00:00	0	0	0	1017.4	60	-0.0378
2019-01-14 07:15:00	0	0	0	1017.5	60.1	0.021315
2019-01-14 07:30:00	0	33	0	1017.3	60	0.328251
2019-01-14 07:45:00	0	0	0	1017.3	59.5	1.0423
2019-01-14 08:00:00	53	58	44	1017.3	59.5	3.03099
2019-01-14 08:15:00	95	94	58	1017.1	59.9	4.28005
2019-01-14 08:30:00	144	0	87	1017.4	60.4	4.5742
2019-01-14 08:45:00	203	0	108	1017.3	60.7	6.40303
2019-01-14 09:00:00	258	0	122	1017.4	60.6	12.7016
2019-01-14 09:15:00	304	0	140	1017.2	60.1	9.43402
2019-01-14 09:30:00	314	0	144	1017	59.9	16.9881
2019-01-14 09:45:00	423	0	164	1017.3	59.8	18.9107
2019-01-14 10:00:00	486	0	173	1017	59.8	20.2599
2019-01-14 10:15:00	538	37	179	1017.1	59.5	21.7008
2019-01-14 10:30:00	582	45	183	1016.8	59	22.2955
2019-01-14 10:45:00	616	0	190	1016.7	58.6	23.4273
2019-01-14 11:00:00	643	0	195	1016.3	58.1	24.5932
2019-01-14 11:15:00	668	0	193	1016.1	57.6	25.4203
2019-01-14 11:30:00	688	0	195	1015.8	57.2	25.821
2019-01-14 11:45:00	694	61	199	1015.3	56.5	26.2281
2019-01-14 12:00:00	690	149	207	1015.1	56.1	27.3471
2019-01-14 12:15:00	677	0	212	1014.5	55.5	17.4786
2019-01-14 12:30:00	665	124	220	1014.3	55	17.9863
2019-01-14 12:45:00	656	0	220	1013.9	54.7	27.7841
2019-01-14 13:00:00	638	68	209	1013.8	54.2	28.9351
2019-01-14 13:15:00	642	135	195	1013.5	53.8	26.9912
2019-01-14 13:30:00	626	0	185	1013.2	53.7	13.9464
2019-01-14 13:45:00	592	0	179	1013.2	53.5	18.6705
2019-01-14 14:00:00	560	0	173	1013.1	53.6	19.4222
2019-01-14 14:15:00	517	82	162	1012.8	53.6	19.3242
2019-01-14 14:30:00	483	112	154	1012.6	53.6	17.847
2019-01-14 14:45:00	445	0	142	1012.1	54	15.9458
2019-01-14 15:00:00	392	110	131	1011.8	54	14.6178
2019-01-14 15:15:00	339	78	122	1011.8	54	11.4206
2019-01-14 15:30:00	292	99	110	1011.9	53.2	11.2479
2019-01-14 15:45:00	208	38	98	1011.6	53.3	7.42615
2019-01-14 16:00:00	207	0	100	1011.3	53.1	3.20791
2019-01-14 16:15:00	59	0	57	1011.6	53.8	2.13576
2019-01-14 16:30:00	39	0	39	1011.5	54.3	1.22348
2019-01-14 16:45:00	0	56	0	1011.1	54.3	0.622398
2019-01-14 17:00:00	0	165	0	1011.1	54.7	0.211018
2019-01-14 17:15:00	0	109	0	1011.1	54.9	-0.0063
2019-01-14 17:30:00	0	0	0	1011.3	54.8	-0.0399
2019-01-14 17:45:00	0	105	0	1011.6	54.9	-0.0378
2019-01-14 18:00:00	0	0	0	1011.6	55.6	-0.0378
2019-01-14 18:15:00	0	111	0	1011.7	55.4	-0.0378
2019-01-14 18:30:00	0	0	0	1011.7	55.5	-0.0378
2019-01-14 18:45:00	0	0	0	1011.7	55.3	-0.0378
2019-01-14 19:00:00	0	125	0	1011.8	55.1	-0.0378
2019-01-14 19:15:00	0	0	0	1011.9	55.4	-0.0378
2019-01-14 19:30:00	0	0	0	1011.8	55.8	-0.0378
2019-01-14 19:45:00	0	0	0	1011.8	56.2	-0.0378
2019-01-14 20:00:00	0	104	0	1012	56.1	-0.0378
2019-01-14 20:15:00	0	0	0	1011.9	56.3	-0.0378
2019-01-14 20:30:00	0	0	0	1012.1	56.7	-0.0378
2019-01-14 20:45:00	0	49	0	1012.3	56.7	-0.0378
2019-01-14 21:00:00	0	0	0	1012.5	56.9	-0.0378
2019-01-14 21:15:00	0	63	0	1012.9	57.8	-0.0378
2019-01-14 21:30:00	0	0	0	1013	57.9	-0.0378
2019-01-14 21:45:00	0	70	0	1013.2	57.5	-0.0378
2019-01-14 22:00:00	0	50	0	1013.4	57.2	-0.0378
2019-01-14 22:15:00	0	0	0	1013.4	57.8	-0.0378
2019-01-14 22:30:00	0	0	0	1013.3	58.1	-0.0378
2019-01-14 22:45:00	0	38	0	1013.4	58	-0.0378
2019-01-14 23:00:00	0	0	0	1013.5	58	-0.0378
2019-01-14 23:15:00	0	0	0	1013.6	58.5	-0.0378
2019-01-14 23:30:00	0	41	0	1013.6	58.9	-0.0378
2019-01-14 23:45:00	0	38	0	1013.5	59.2	-0.0378
2019-01-15	0	0	0	1013.4	59.2	-0.0378
2019-01-15 00:15:00	0	0	0	1013.2	59.7	-0.0378
2019-01-15 00:30:00	0	37	0	1013.7	60.2	-0.0378
2019-01-15 00:45:00	0	0	0	1013.7	60.9	-0.0378
2019-01-15 01:00:00	0	0	0	1013.8	61.2	-0.0378
2019-01-15 01:15:00	0	0	0	1014.4	61.6	-0.0378
2019-01-15 01:30:00	0	0	0	1014.9	62.8	-0.0378
2019-01-15 01:45:00	0	0	0	1014.8	64.1	-0.0378
2019-01-15 02:00:00	0	0	0	1015	65.2	-0.0378
2019-01-15 02:15:00	0	0	0	1015.1	66	-0.0378
2019-01-15 02:30:00	0	0	0	1015.3	67.1	-0.0378
2019-01-15 02:45:00	0	0	0	1015.6	68.1	-0.0378
2019-01-15 03:00:00	0	0	0	1015.9	68.9	-0.0378
2019-01-15 03:15:00	0	0	0	1015.8	69.7	-0.0378
2019-01-15 03:30:00	0	0	0	1015.5	70.3	-0.0378
2019-01-15 03:45:00	0	0	0	1015.4	70.6	-0.0378
2019-01-15 04:00:00	0	0	0	1015.9	70.7	-0.0378
2019-01-15 04:15:00	0	0	0	1015.6	70.8	-0.0378
2019-01-15 04:30:00	0	0	0	1015.9	70.9	-0.0378
2019-01-15 04:45:00	0	0	0	1016.2	71.3	-0.0378
2019-01-15 05:00:00	0	0	0	1016.8	71.6	-0.0378
2019-01-15 05:15:00	0	0	0	1017	71.8	-0.0378
2019-01-15 05:30:00	0	0	0	1017.1	71.9	-0.0378
2019-01-15 05:45:00	0	0	0	1017.2	72.1	-0.0378
2019-01-15 06:00:00	0	0	0	1017.9	72.1	-0.0378
2019-01-15 06:15:00	0	0	0	1018.1	72	-0.0378
2019-01-15 06:30:00	0	0	0	1018.4	71.7	-0.0378
2019-01-15 06:45:00	0	0	0	1018.5	71.3	-0.0378
2019-01-15 07:00:00	0	0	0	1018.7	70.9	-0.0378
2019-01-15 07:15:00	0	0	0	1018.9	70.5	0.0234465
2019-01-15 07:30:00	0	0	0	1018.8	70.2	0.32612
2019-01-15 07:45:00	0	0	0	1019.3	69.9	0.827022
2019-01-15 08:00:00	37	0	41	1019.6	69.8	2.17413
2019-01-15 08:15:00	48	0	55	1019.7	69.7	3.34859
2019-01-15 08:30:00	66	0	73	1020.2	69.6	4.81506
2019-01-15 08:45:00	91	0	100	1020.8	69.1	6.99132
2019-01-15 09:00:00	94	0	107	1021.3	68.1	13.6672
2019-01-15 09:15:00	136	0	144	1021.7	67	16.8431
2019-01-15 09:30:00	123	0	141	1021.9	66.2	18.2307
2019-01-15 09:45:00	103	0	122	1022.2	65.4	19.8102
2019-01-15 10:00:00	70	0	84	1022.3	64.7	21.0102
2019-01-15 10:15:00	114	0	145	1022.4	64	22.012
2019-01-15 10:30:00	134	0	171	1022.4	63.5	22.5811
2019-01-15 10:45:00	119	0	155	1022.8	63	23.6319
2019-01-15 11:00:00	89	0	109	1022.9	62.6	24.9492
2019-01-15 11:15:00	36	0	52	1023.2	62.6	26.2047
2019-01-15 11:30:00	0	0	0	1023.1	63.6	26.3475
2019-01-15 11:45:00	36	0	46	1023	63.7	26.4647
2019-01-15 12:00:00	44	0	49	1023.5	65.5	26.405
2019-01-15 12:15:00	30	0	39	1023.9	66.7	26.3304
2019-01-15 12:30:00	106	0	119	1024	68.1	26.2984
2019-01-15 12:45:00	88	51	85	1024.5	68.2	26.3091
2019-01-15 13:00:00	134	0	120	1024.3	67.3	25.1133
2019-01-15 13:15:00	150	0	142	1024.2	66	24.2906
2019-01-15 13:30:00	175	43	123	1024	64.5	23.5637
2019-01-15 13:45:00	182	0	163	1024.4	62	22.8049
2019-01-15 14:00:00	211	0	177	1024.9	61.6	21.9587
2019-01-15 14:15:00	284	69	143	1025	59.9	20.0958
2019-01-15 14:30:00	232	0	128	1025	59.1	19.678
2019-01-15 14:45:00	269	0	153	1025.4	59	18.2925
2019-01-15 15:00:00	105	103	118	1025.9	58.8	16.7621
2019-01-15 15:15:00	81	0	90	1025.9	59.3	14.9354
2019-01-15 15:30:00	69	66	65	1025.6	59.1	10.698
2019-01-15 15:45:00	38	0	45	1025.9	59.3	4.55502
2019-01-15 16:00:00	46	0	54	1027	59.1	1.88638
2019-01-15 16:15:00	49	0	54	1026.8	58.9	1.56878
2019-01-15 16:30:00	35	111	36	1027.1	57.7	0.912282
2019-01-15 16:45:00	33	33	32	1026.8	58.5	0.620267
2019-01-15 17:00:00	0	0	0	1026.9	58.6	0.157731
2019-01-15 17:15:00	0	0	0	1027.7	59.4	-0.0336
2019-01-15 17:30:00	0	0	0	1027.7	59.1	-0.0378
2019-01-15 17:45:00	0	0	0	1028.3	59.2	-0.0378
2019-01-15 18:00:00	0	68	0	1028.2	59	-0.0378
2019-01-15 18:15:00	0	0	0	1028.5	59.1	-0.0378
2019-01-15 18:30:00	0	153	0	1028.5	59.1	-0.0378
2019-01-15 18:45:00	0	96	0	1028.8	59	-0.0378
2019-01-15 19:00:00	0	0	0	1029	59.4	-0.0378
2019-01-15 19:15:00	0	0	0	1029.1	59.5	-0.0378
2019-01-15 19:30:00	0	0	0	1029.2	59.5	-0.0378
2019-01-15 19:45:00	0	245	0	1029.3	59.5	-0.0378
2019-01-15 20:00:00	0	108	0	1029.8	59.8	-0.0378
2019-01-15 20:15:00	0	45	0	1030	59.7	-0.0378
2019-01-15 20:30:00	0	0	0	1030	59.7	-0.0378
2019-01-15 20:45:00	0	0	0	1030.5	59.8	-0.0378
2019-01-15 21:00:00	0	0	0	1030.7	60	-0.0378
2019-01-15 21:15:00	0	0	0	1030.8	60.2	-0.0378
2019-01-15 21:30:00	0	0	0	1030.6	60.3	-0.0378
2019-01-15 21:45:00	0	0	0	1030.8	61.1	-0.0378
2019-01-15 22:00:00	0	115	0	1030.9	61.2	-0.0378
2019-01-15 22:15:00	0	0	0	1030.9	63.2	-0.0378
2019-01-15 22:30:00	0	0	0	1030.9	64	-0.0378
2019-01-15 22:45:00	0	0	0	1031.1	64.4	-0.0378
2019-01-15 23:00:00	0	76	0	1031.1	64.3	-0.0378
2019-01-15 23:15:00	0	0	0	1031.2	64.6	-0.0378
2019-01-15 23:30:00	0	0	0	1031.5	65	-0.0378
2019-01-15 23:45:00	0	0	0	1031.6	65.3	-0.0378
2019-01-16	0	0	0	1031.5	65.7	-0.0378
2019-01-16 00:15:00	0	0	0	1031.6	65.5	-0.0378
2019-01-16 00:30:00	0	0	0	1032.1	65.4	-0.0378
2019-01-16 00:45:00	0	0	0	1032.2	65.2	-0.0378
2019-01-16 01:00:00	0	36	0	1032.4	64.9	-0.0378
2019-01-16 01:15:00	0	55	0	1032.2	65	-0.0378
2019-01-16 01:30:00	0	0	0	1032.2	65	-0.0378
2019-01-16 01:45:00	0	0	0	1032.1	65.1	-0.0378
2019-01-16 02:00:00	0	0	0	1032.3	64.6	-0.0378
2019-01-16 02:15:00	0	88	0	1032.4	63.8	-0.0378
2019-01-16 02:30:00	0	0	0	1032.4	63.3	-0.0378
2019-01-16 02:45:00	0	30	0	1032.5	63.1	-0.0378
2019-01-16 03:00:00	0	0	0	1032.9	63.2	-0.0378
2019-01-16 03:15:00	0	0	0	1032.8	63.3	-0.0378
2019-01-16 03:30:00	0	0	0	1032.3	63.6	-0.0378
2019-01-16 03:45:00	0	68	0	1032.4	63.9	-0.0378
2019-01-16 04:00:00	0	0	0	1032.4	63.8	-0.0378
2019-01-16 04:15:00	0	0	0	1032.5	63.9	-0.0378
2019-01-16 04:30:00	0	0	0	1032.8	63.9	-0.0378
2019-01-16 04:45:00	0	0	0	1032.8	63.5	-0.0378
2019-01-16 05:00:00	0	0	0	1032.9	64.2	-0.0378
2019-01-16 05:15:00	0	0	0	1032.8	64.8	-0.0378
2019-01-16 05:30:00	0	0	0	1032.9	65	-0.0378
2019-01-16 05:45:00	0	0	0	1032.9	65.6	-0.0378
2019-01-16 06:00:00	0	0	0	1033.1	66	-0.0378
2019-01-16 06:15:00	0	0	0	1033.3	66.5	-0.0378
2019-01-16 06:30:00	0	0	0	1033.2	66.9	-0.0378
2019-01-16 06:45:00	0	0	0	1033.5	67.2	-0.0378
2019-01-16 07:00:00	0	0	0	1033.6	67.6	-0.0378
2019-01-16 07:15:00	0	0	0	1033.5	67.8	-0.0147
2019-01-16 07:30:00	0	0	0	1033.7	67.8	0.353829
2019-01-16 07:45:00	78	0	0	1033.9	67.6	0.959175
2019-01-16 08:00:00	176	0	33	1033.9	67.4	0.839811
2019-01-16 08:15:00	269	0	43	1034.1	66.9	1.13183
2019-01-16 08:30:00	346	0	51	1034.4	66.3	1.64552
2019-01-16 08:45:00	408	0	57	1034.7	65.5	2.69208
2019-01-16 09:00:00	497	65	61	1034.8	64.3	4.04559
2019-01-16 09:15:00	553	0	70	1035	62.7	5.45877
2019-01-16 09:30:00	535	0	78	1035.3	60.4	5.68471
2019-01-16 09:45:00	661	0	84	1035.3	59.4	5.94262
2019-01-16 10:00:00	710	53	90	1035.5	58.2	5.69537
2019-01-16 10:15:00	754	0	92	1035.4	57.6	5.41401
2019-01-16 10:30:00	775	59	96	1035.4	56.7	5.98099
2019-01-16 10:45:00	788	0	102	1035.3	56.5	7.41762
2019-01-16 11:00:00	790	0	114	1035.1	56.6	8.18709
2019-01-16 11:15:00	809	0	113	1035	56	6.65881
2019-01-16 11:30:00	835	31	112	1034.8	54.9	6.6247
2019-01-16 11:45:00	850	0	120	1034.4	52.9	7.04461
2019-01-16 12:00:00	803	46	159	1034.2	54.6	5.92983
2019-01-16 12:15:00	746	0	157	1034	51.1	5.39696
2019-01-16 12:30:00	873	0	174	1033.9	51.5	6.3135
2019-01-16 12:45:00	633	56	170	1033.9	52.3	7.3281
2019-01-16 13:00:00	860	55	126	1033.5	50.7	7.4027
2019-01-16 13:15:00	826	0	114	1033.4	48.3	6.69717
2019-01-16 13:30:00	802	52	122	1033.3	46.6	5.75292
2019-01-16 13:45:00	769	0	112	1033.2	45.2	7.76505
2019-01-16 14:00:00	755	35	104	1033.4	46.4	10.0671
2019-01-16 14:15:00	707	43	0	1033.2	42.8	6.62683
2019-01-16 14:30:00	659	0	92	1033.1	43.1	5.74013
2019-01-16 14:45:00	598	0	89	1032.9	43.5	5.91918
2019-01-16 15:00:00	528	33	86	1033	43.8	4.46976
2019-01-16 15:15:00	486	0	80	1033.2	43.7	3.77702
2019-01-16 15:30:00	419	0	74	1033.4	43	2.8285
2019-01-16 15:45:00	341	0	69	1033.5	41.6	1.75209
2019-01-16 16:00:00	257	0	62	1033.3	42.9	1.36203
2019-01-16 16:15:00	180	0	54	1033.5	43	1.01033
2019-01-16 16:30:00	110	0	39	1033.5	40.2	0.560585
2019-01-16 16:45:00	50	42	0	1033.7	39	0.268569
2019-01-16 17:00:00	0	31	0	1033.8	39.1	0.0447615
2019-01-16 17:15:00	0	0	0	1034	39.8	-0.0546
2019-01-16 17:30:00	0	0	0	1034	38.8	-0.0378
2019-01-16 17:45:00	0	47	0	1034.2	40.9	-0.0378
2019-01-16 18:00:00	0	38	0	1034.3	43.1	-0.0378
2019-01-16 18:15:00	0	0	0	1034.5	41.3	-0.0378
2019-01-16 18:30:00	0	0	0	1034.4	42.3	-0.0378
2019-01-16 18:45:00	0	0	0	1034.5	43	-0.0378
2019-01-16 19:00:00	0	0	0	1034.5	43.7	-0.0378
2019-01-16 19:15:00	0	0	0	1034.5	45.2	-0.0378
2019-01-16 19:30:00	0	0	0	1034.5	45.2	-0.0378
2019-01-16 19:45:00	0	0	0	1034.5	46	-0.0378
2019-01-16 20:00:00	0	0	0	1034.7	48.2	-0.0378
2019-01-16 20:15:00	0	0	0	1034.8	49.9	-0.0378
2019-01-16 20:30:00	0	0	0	1034.9	51.5	-0.0378
2019-01-16 20:45:00	0	0	0	1034.8	51.9	-0.0378
2019-01-16 21:00:00	0	0	0	1035	50.6	-0.0378
2019-01-16 21:15:00	0	0	0	1035.1	52.5	-0.0378
2019-01-16 21:30:00	0	0	0	1035.1	54.6	-0.0378
2019-01-16 21:45:00	0	61	0	1035.2	56.6	-0.0378
2019-01-16 22:00:00	0	0	0	1035.4	54.8	-0.0378
2019-01-16 22:15:00	0	0	0	1035.5	53	-0.0378
2019-01-16 22:30:00	0	0	0	1035.5	52.7	-0.0378
2019-01-16 22:45:00	0	0	0	1035.4	53.4	-0.0378
2019-01-16 23:00:00	0	0	0	1035.6	51.8	-0.0378
2019-01-16 23:15:00	0	0	0	1035.5	52.8	-0.0378
2019-01-16 23:30:00	0	0	0	1035.5	52.4	-0.0378
2019-01-16 23:45:00	0	0	0	1035.5	52.6	-0.0378
2019-01-17	0	0	0	1035.6	53.1	-0.0378
2019-01-17 00:15:00	0	0	0	1035.4	53	-0.0378
2019-01-17 00:30:00	0	0	0	1035.4	53.1	-0.0378
2019-01-17 00:45:00	0	0	0	1035.4	55.4	-0.0378
2019-01-17 01:00:00	0	0	0	1035.3	55.8	-0.0378
2019-01-17 01:15:00	0	0	0	1035.3	55.3	-0.0378
2019-01-17 01:30:00	0	0	0	1035.2	54.5	-0.0378
2019-01-17 01:45:00	0	0	0	1035.2	56	-0.0378
2019-01-17 02:00:00	0	0	0	1035.1	56.8	-0.0378
2019-01-17 02:15:00	0	0	0	1035	58.9	-0.0378
2019-01-17 02:30:00	0	0	0	1034.9	58.4	-0.0378
2019-01-17 02:45:00	0	48	0	1034.5	59.8	-0.0378
2019-01-17 03:00:00	0	0	0	1034.4	59.3	-0.0378
2019-01-17 03:15:00	0	0	0	1034.4	58.5	-0.0378
2019-01-17 03:30:00	0	80	0	1034.1	58	-0.0378
2019-01-17 03:45:00	0	37	0	1033.8	58.7	-0.0378
2019-01-17 04:00:00	0	0	0	1033.7	59.4	-0.0378
2019-01-17 04:15:00	0	98	0	1033.4	60.3	-0.0378
2019-01-17 04:30:00	0	0	0	1033.5	57	-0.0378
2019-01-17 04:45:00	0	0	0	1033.6	55.9	-0.0378
2019-01-17 05:00:00	0	0	0	1033.6	58.1	-0.0378
2019-01-17 05:15:00	0	61	0	1033.3	57.9	-0.0378
2019-01-17 05:30:00	0	0	0	1033.4	57.5	-0.0378
2019-01-17 05:45:00	0	0	0	1033.4	57.9	-0.0378
2019-01-17 06:00:00	0	72	0	1033.2	58.8	-0.0378
2019-01-17 06:15:00	0	0	0	1033	57.5	-0.0378
2019-01-17 06:30:00	0	33	0	1033	57.6	-0.0378
2019-01-17 06:45:00	0	0	0	1033	60.7	-0.0378
2019-01-17 07:00:00	0	0	0	1032.8	62.8	-0.0378
2019-01-17 07:15:00	0	0	0	1032.6	61.6	-0.0189
2019-01-17 07:30:00	0	99	0	1032.4	62.3	0.236596
2019-01-17 07:45:00	76	0	0	1032.4	63.2	1.00394
2019-01-17 08:00:00	159	63	38	1032.1	63.6	1.556
2019-01-17 08:15:00	257	0	48	1032.1	61.9	1.52189
2019-01-17 08:30:00	334	0	55	1032.2	60.4	2.48959
2019-01-17 08:45:00	408	0	58	1032.3	58.7	3.93688
2019-01-17 09:00:00	483	0	61	1032.3	57	5.41188
2019-01-17 09:15:00	549	0	63	1032.3	56.4	6.43926
2019-01-17 09:30:00	609	0	64	1032.4	56.5	7.63716
2019-01-17 09:45:00	661	0	66	1032.2	56	8.90754
2019-01-17 10:00:00	697	36	72	1032.1	55	10.082
2019-01-17 10:15:00	737	0	75	1032	55.1	11.233
2019-01-17 10:30:00	769	0	76	1031.6	55.1	12.2519
2019-01-17 10:45:00	807	42	76	1031.1	52.7	13.7759
2019-01-17 11:00:00	815	0	87	1030.7	48.9	14.9439
2019-01-17 11:15:00	838	0	83	1030.3	45.1	16.176
2019-01-17 11:30:00	862	0	82	1029.7	44.4	16.4872
2019-01-17 11:45:00	865	38	84	1029.3	41.1	16.8815
2019-01-17 12:00:00	854	0	87	1029	37.6	17.5359
2019-01-17 12:15:00	880	40	86	1028.5	33.8	17.376
2019-01-17 12:30:00	891	0	79	1028.2	30.3	17.1437
2019-01-17 12:45:00	884	0	74	1027.5	29.2	17.4783
2019-01-17 13:00:00	861	58	77	1027.3	30.6	17.5827
2019-01-17 13:15:00	858	39	77	1026.8	32	13.9776
2019-01-17 13:30:00	838	0	75	1026.3	30.8	8.85851
2019-01-17 13:45:00	800	0	78	1026.1	31.3	12.7528
2019-01-17 14:00:00	765	0	73	1025.7	29.6	11.4014
2019-01-17 14:15:00	723	32	75	1025.2	29.3	10.8877
2019-01-17 14:30:00	693	0	70	1025.1	27.3	10.3378
2019-01-17 14:45:00	640	37	69	1024.7	26.1	10.3889
2019-01-17 15:00:00	579	36	67	1024.5	27	9.09298
2019-01-17 15:15:00	514	43	64	1024.3	26.4	7.47943
2019-01-17 15:30:00	445	0	61	1024	27.1	5.90426
2019-01-17 15:45:00	371	0	57	1023.9	26.4	3.88146
2019-01-17 16:00:00	294	0	53	1023.7	26.1	2.34891
2019-01-17 16:15:00	203	0	48	1023.8	28.6	1.98443
2019-01-17 16:30:00	121	0	36	1023.6	28.7	1.18298
2019-01-17 16:45:00	59	60	0	1023.5	30.2	0.622398
2019-01-17 17:00:00	0	0	0	1023.5	31	0.21315
2019-01-17 17:15:00	0	0	0	1023.5	32.6	-0.0021
2019-01-17 17:30:00	0	0	0	1023.3	33.7	-0.0441
2019-01-17 17:45:00	0	39	0	1023.1	34.9	-0.0378
2019-01-17 18:00:00	0	0	0	1023.3	36.9	-0.0378
2019-01-17 18:15:00	0	0	0	1023	39.3	-0.0378
2019-01-17 18:30:00	0	0	0	1022.9	41.2	-0.0378
2019-01-17 18:45:00	0	62	0	1022.8	46.8	-0.0378
2019-01-17 19:00:00	0	79	0	1022.9	49.4	-0.0357
2019-01-17 19:15:00	0	0	0	1022.7	47.8	-0.0378
2019-01-17 19:30:00	0	0	0	1022.6	45.8	-0.0378
2019-01-17 19:45:00	0	59	0	1022.5	48.1	-0.0378
2019-01-17 20:00:00	0	0	0	1022.4	45.8	-0.0378
2019-01-17 20:15:00	0	50	0	1022.3	48.9	-0.0378
2019-01-17 20:30:00	0	0	0	1022.1	49	-0.0378
2019-01-17 20:45:00	0	0	0	1022.3	47.1	-0.0378
2019-01-17 21:00:00	0	0	0	1022.3	47.4	-0.0336
2019-01-17 21:15:00	0	70	0	1022.2	49.8	-0.0378
2019-01-17 21:30:00	0	0	0	1022	47.9	-0.0357
2019-01-17 21:45:00	0	0	0	1022	48.8	-0.0378
2019-01-17 22:00:00	0	0	0	1021.8	49	-0.0357
2019-01-17 22:15:00	0	0	0	1021.6	51	-0.0378
2019-01-17 22:30:00	0	0	0	1021.4	52	-0.0357
2019-01-17 22:45:00	0	85	0	1021.3	51	-0.0378
2019-01-17 23:00:00	0	76	0	1021.3	52.2	-0.0378
2019-01-17 23:15:00	0	0	0	1021.1	53.1	-0.0357
2019-01-17 23:30:00	0	56	0	1020.9	52.4	-0.0378
2019-01-17 23:45:00	0	0	0	1020.7	51.4	-0.0378
2019-01-18	0	62	0	1020.4	53.3	-0.0357
2019-01-18 00:15:00	0	0	0	1020.3	53.8	-0.0378
2019-01-18 00:30:00	0	0	0	1020.3	55.6	-0.0378
2019-01-18 00:45:00	0	32	0	1020.2	56.9	-0.0378
2019-01-18 01:00:00	0	101	0	1020	57.1	-0.0378
2019-01-18 01:15:00	0	0	0	1019.8	57.3	-0.0378
2019-01-18 01:30:00	0	93	0	1019.7	55.6	-0.0378
2019-01-18 01:45:00	0	62	0	1019.8	56.7	-0.0378
2019-01-18 02:00:00	0	0	0	1019.8	55.4	-0.0378
2019-01-18 02:15:00	0	86	0	1019.8	56.3	-0.0378
2019-01-18 02:30:00	0	0	0	1019.7	58.3	-0.0378
2019-01-18 02:45:00	0	0	0	1019.8	59.2	-0.0378
2019-01-18 03:00:00	0	77	0	1019.7	58.9	-0.0378
2019-01-18 03:15:00	0	39	0	1019.8	58.7	-0.0378
2019-01-18 03:30:00	0	0	0	1019.6	58.8	-0.0378
2019-01-18 03:45:00	0	0	0	1019.6	58.5	-0.0357
2019-01-18 04:00:00	0	87	0	1019.7	59.6	-0.0357
2019-01-18 04:15:00	0	0	0	1019.7	59.9	-0.0357
2019-01-18 04:30:00	0	0	0	1019.9	58.6	-0.0378
2019-01-18 04:45:00	0	0	0	1020	55.5	-0.0378
2019-01-18 05:00:00	0	0	0	1019.9	54.5	-0.0378
2019-01-18 05:15:00	0	81	0	1020.2	51.7	-0.0378
2019-01-18 05:30:00	0	0	0	1020.1	52.2	-0.0357
2019-01-18 05:45:00	0	0	0	1020.3	51.7	-0.0378
2019-01-18 06:00:00	0	0	0	1020.5	52.1	-0.0378
2019-01-18 06:15:00	0	0	0	1020.6	53	-0.0357
2019-01-18 06:30:00	0	45	0	1020.6	53.1	-0.0378
2019-01-18 06:45:00	0	0	0	1021	54.2	-0.0378
2019-01-18 07:00:00	0	79	0	1021.3	54	-0.0378
2019-01-18 07:15:00	0	49	0	1021.6	56.6	-0.0357
2019-01-18 07:30:00	0	39	0	1021.9	58.8	0.0746025
2019-01-18 07:45:00	77	0	0	1022	57.2	0.336777
2019-01-18 08:00:00	168	0	38	1022.4	56.9	0.703395
2019-01-18 08:15:00	256	42	51	1022.7	57.7	1.04657
2019-01-18 08:30:00	326	0	58	1023	57.2	2.35104
2019-01-18 08:45:00	406	52	63	1023.4	56.8	3.59797
2019-01-18 09:00:00	474	0	67	1023.6	53	4.0328
2019-01-18 09:15:00	538	0	71	1023.9	48.9	6.17282
2019-01-18 09:30:00	594	0	74	1024.3	48.2	6.07264
2019-01-18 09:45:00	650	43	77	1024.7	48.6	10.6042
2019-01-18 10:00:00	690	0	84	1024.9	45.8	11.9343
2019-01-18 10:15:00	726	0	84	1025.2	43.9	10.2099
2019-01-18 10:30:00	759	34	86	1025.5	42.8	16.1802
2019-01-18 10:45:00	786	0	87	1025.6	38	17.7682
2019-01-18 11:00:00	814	47	93	1025.8	32.8	19.1942
2019-01-18 11:15:00	836	0	90	1025.7	30.6	19.2858
2019-01-18 11:30:00	852	0	91	1025.5	31.8	19.1345
2019-01-18 11:45:00	865	0	90	1025.3	28.1	19.175
2019-01-18 12:00:00	874	0	88	1025.2	30.2	21.0997
2019-01-18 12:15:00	891	0	85	1024.9	26.5	20.8823
2019-01-18 12:30:00	878	0	86	1024.9	36	20.4219
2019-01-18 12:45:00	882	51	82	1025	35.5	19.7015
2019-01-18 13:00:00	873	51	80	1025.1	36	14.9879
2019-01-18 13:15:00	856	0	77	1025	39.6	18.7167
2019-01-18 13:30:00	837	61	77	1025	39	18.3778
2019-01-18 13:45:00	802	0	74	1025	37.2	17.5742
2019-01-18 14:00:00	775	0	69	1025.1	38.2	12.6574
2019-01-18 14:15:00	752	41	64	1025.2	39.9	12.4927
2019-01-18 14:30:00	711	0	58	1025.3	41.5	12.2494
2019-01-18 14:45:00	668	0	59	1025.4	42.8	11.3649
2019-01-18 15:00:00	609	39	58	1025.3	44.2	11.12
2019-01-18 15:15:00	557	69	54	1025.7	47.4	8.18496
2019-01-18 15:30:00	491	58	50	1025.7	44.2	7.59027
2019-01-18 15:45:00	425	0	47	1025.8	38.7	4.29284
2019-01-18 16:00:00	354	0	42	1026.3	38.6	2.65585
2019-01-18 16:15:00	276	0	38	1026.6	46.2	1.36203
2019-01-18 16:30:00	187	0	33	1026.6	49.8	0.976227
2019-01-18 16:45:00	98	88	0	1026.9	55.4	0.684211
2019-01-18 17:00:00	0	34	0	1027.2	56.5	0.24086
2019-01-18 17:15:00	0	153	0	1027.4	60.2	-0.0231
2019-01-18 17:30:00	0	0	0	1027.4	61.5	-0.0336
2019-01-18 17:45:00	0	236	0	1027.6	61.9	-0.0378
2019-01-18 18:00:00	0	0	0	1028	62.3	-0.0357
2019-01-18 18:15:00	0	94	0	1028.2	62.5	-0.0378
2019-01-18 18:30:00	0	192	0	1028.1	62.8	-0.0378
2019-01-18 18:45:00	0	40	0	1028.7	63	-0.0357
2019-01-18 19:00:00	0	0	0	1028.5	62.8	-0.0378
2019-01-18 19:15:00	0	0	0	1028.7	62.3	-0.0378
2019-01-18 19:30:00	0	43	0	1029	62.1	-0.0378
2019-01-18 19:45:00	0	232	0	1028.9	61.6	-0.0378
2019-01-18 20:00:00	0	131	0	1028.9	61.7	-0.0378
2019-01-18 20:15:00	0	145	0	1029.1	61.7	-0.0357
2019-01-18 20:30:00	0	0	0	1029.4	61.8	-0.0378
2019-01-18 20:45:00	0	197	0	1029.5	61.8	-0.0378
2019-01-18 21:00:00	0	31	0	1029.6	62.2	-0.0357
2019-01-18 21:15:00	0	0	0	1029.7	61.5	-0.0378
2019-01-18 21:30:00	0	0	0	1029.9	60.8	-0.0378
2019-01-18 21:45:00	0	0	0	1029.8	60.9	-0.0357
2019-01-18 22:00:00	0	150	0	1029.6	60.5	-0.0378
2019-01-18 22:15:00	0	134	0	1029.5	60.5	-0.0378
2019-01-18 22:30:00	0	54	0	1029.5	61.1	-0.0378
2019-01-18 22:45:00	0	0	0	1029.3	61	-0.0357
2019-01-18 23:00:00	0	78	0	1029.6	60.2	-0.0378
2019-01-18 23:15:00	0	0	0	1029.4	60.5	-0.0378
2019-01-18 23:30:00	0	81	0	1029.4	60.7	-0.0357
2019-01-18 23:45:00	0	63	0	1029.1	60.8	-0.0378
2019-01-19	0	143	0	1029.1	61.1	-0.0378
2019-01-19 00:15:00	0	0	0	1029.2	61.2	-0.0378
2019-01-19 00:30:00	0	70	0	1029.2	61.4	-0.0378
2019-01-19 00:45:00	0	0	0	1029.4	61.2	-0.0357
2019-01-19 01:00:00	0	0	0	1029.3	61.1	-0.0378
2019-01-19 01:15:00	0	0	0	1029.4	61.2	-0.0378
2019-01-19 01:30:00	0	0	0	1029.6	61.2	-0.0378
2019-01-19 01:45:00	0	0	0	1029.6	60.7	-0.0378
2019-01-19 02:00:00	0	0	0	1029.7	61.4	-0.0378
2019-01-19 02:15:00	0	0	0	1029.6	61.6	-0.0357
2019-01-19 02:30:00	0	0	0	1029.5	61.7	-0.0357
2019-01-19 02:45:00	0	0	0	1029.7	62	-0.0357
2019-01-19 03:00:00	0	0	0	1029.6	62.4	-0.0378
2019-01-19 03:15:00	0	167	0	1029.4	62.7	-0.0378
2019-01-19 03:30:00	0	144	0	1029.4	63	-0.0378
2019-01-19 03:45:00	0	94	0	1029.2	63.4	-0.0378
2019-01-19 04:00:00	0	0	0	1029.1	63.5	-0.0378
2019-01-19 04:15:00	0	0	0	1029.1	63.2	-0.0378
2019-01-19 04:30:00	0	0	0	1029	63.5	-0.0378
2019-01-19 04:45:00	0	0	0	1029	63.4	-0.0378
2019-01-19 05:00:00	0	55	0	1029.1	64.2	-0.0378
2019-01-19 05:15:00	0	0	0	1029.1	64.3	-0.0378
2019-01-19 05:30:00	0	0	0	1029.1	64.5	-0.0378
2019-01-19 05:45:00	0	0	0	1029.1	64.4	-0.0378
2019-01-19 06:00:00	0	0	0	1029	62.9	-0.0378
2019-01-19 06:15:00	0	0	0	1029	61.5	-0.0357
2019-01-19 06:30:00	0	59	0	1029.1	61.4	-0.0357
2019-01-19 06:45:00	0	0	0	1029.1	61.4	-0.0378
2019-01-19 07:00:00	0	0	0	1029	62.1	-0.0378
2019-01-19 07:15:00	0	0	0	1029.1	62.2	0.008526
2019-01-19 07:30:00	0	0	0	1029.1	61.8	0.279226
2019-01-19 07:45:00	56	0	0	1029.1	61.7	0.822759
2019-01-19 08:00:00	121	0	41	1028.9	61.7	1.58157
2019-01-19 08:15:00	200	0	53	1029.2	61.8	2.44057
2019-01-19 08:30:00	274	0	70	1029.4	61.7	3.58305
2019-01-19 08:45:00	350	61	81	1029.4	61.7	8.19775
2019-01-19 09:00:00	413	71	87	1029.5	61.2	10.9858
2019-01-19 09:15:00	476	0	92	1029.8	60.9	13.226
2019-01-19 09:30:00	539	0	95	1029.4	60.7	14.5411
2019-01-19 09:45:00	589	0	101	1029.6	60.6	15.8562
2019-01-19 10:00:00	642	30	103	1029.5	60.6	16.5191
2019-01-19 10:15:00	683	79	107	1029.4	60.5	18.235
2019-01-19 10:30:00	697	0	114	1029.4	60.4	20.2535
2019-01-19 10:45:00	730	35	119	1029.4	60.1	22.0717
2019-01-19 11:00:00	750	0	125	1029.2	59.8	24.071
2019-01-19 11:15:00	771	48	123	1029	59.2	25.0238
2019-01-19 11:30:00	784	40	125	1028.6	59.2	25.384
2019-01-19 11:45:00	788	0	129	1028.3	59	25.3307
2019-01-19 12:00:00	790	0	132	1028.1	58.8	25.3052
2019-01-19 12:15:00	787	0	133	1027.7	58.5	25.6654
2019-01-19 12:30:00	781	0	132	1027.7	58.3	25.0579
2019-01-19 12:45:00	771	39	134	1027.5	57.8	25.8721
2019-01-19 13:00:00	757	97	133	1027.4	57.3	24.8064
2019-01-19 13:15:00	739	0	131	1027.3	56.5	25.9084
2019-01-19 13:30:00	713	68	130	1027.2	55.9	25.0558
2019-01-19 13:45:00	677	0	128	1026.9	55.7	23.909
2019-01-19 14:00:00	636	52	127	1026.7	55.6	22.6642
2019-01-19 14:15:00	601	51	122	1026.7	55.3	20.8631
2019-01-19 14:30:00	557	0	118	1026.6	54.9	19.5011
2019-01-19 14:45:00	508	0	113	1026.6	54	17.7682
2019-01-19 15:00:00	457	0	107	1026.5	55.8	15.756
2019-01-19 15:15:00	404	0	99	1026.3	56.9	13.8526
2019-01-19 15:30:00	345	0	91	1026.1	57.9	11.9535
2019-01-19 15:45:00	279	81	80	1026	58.8	9.73882
2019-01-19 16:00:00	218	50	70	1025.9	59	3.88999
2019-01-19 16:15:00	158	0	59	1026.1	58.9	2.59404
2019-01-19 16:30:00	101	0	44	1026	58.8	1.76488
2019-01-19 16:45:00	50	51	0	1025.8	58.9	0.950649
2019-01-19 17:00:00	0	0	0	1025.9	59.7	0.355961
2019-01-19 17:15:00	0	0	0	1025.8	59.8	0.021315
2019-01-19 17:30:00	0	0	0	1025.9	60.3	-0.0567
2019-01-19 17:45:00	0	0	0	1025.9	60.7	-0.0357
2019-01-19 18:00:00	0	0	0	1025.8	60.7	-0.0378
2019-01-19 18:15:00	0	40	0	1025.9	59.3	-0.0357
2019-01-19 18:30:00	0	113	0	1025.9	58.4	-0.0336
2019-01-19 18:45:00	0	110	0	1026	58	-0.0378
2019-01-19 19:00:00	0	158	0	1025.8	58.5	-0.0378
2019-01-19 19:15:00	0	105	0	1025.6	58.8	-0.0378
2019-01-19 19:30:00	0	0	0	1026	59	-0.0378
2019-01-19 19:45:00	0	35	0	1026	59.4	-0.0378
2019-01-19 20:00:00	0	84	0	1026	59.6	-0.0378
2019-01-19 20:15:00	0	76	0	1025.9	59.9	-0.0378
2019-01-19 20:30:00	0	0	0	1026	60.3	-0.0336
2019-01-19 20:45:00	0	0	0	1026	60.5	-0.0378
2019-01-19 21:00:00	0	0	0	1026	60.6	-0.0378
2019-01-19 21:15:00	0	0	0	1026	60.8	-0.0378
2019-01-19 21:30:00	0	69	0	1026	61.1	-0.0378
2019-01-19 21:45:00	0	76	0	1026.1	61.5	-0.0378
2019-01-19 22:00:00	0	0	0	1026.2	62	-0.0378
2019-01-19 22:15:00	0	0	0	1026.2	62.3	-0.0378
2019-01-19 22:30:00	0	0	0	1026.1	62.8	-0.0378
2019-01-19 22:45:00	0	59	0	1025.9	63.1	-0.0378
2019-01-19 23:00:00	0	58	0	1026	63.4	-0.0357
2019-01-19 23:15:00	0	0	0	1026.1	63.6	-0.0357
2019-01-19 23:30:00	0	0	0	1026.1	63.9	-0.0357
2019-01-19 23:45:00	0	36	0	1026.3	64.1	-0.0378
2019-01-20	0	0	0	1026.1	64.3	-0.0378
2019-01-20 00:15:00	0	0	0	1026	64.5	-0.0378
2019-01-20 00:30:00	0	38	0	1025.8	64.6	-0.0378
2019-01-20 00:45:00	0	0	0	1025.7	64.6	-0.0378
2019-01-20 01:00:00	0	44	0	1025.7	64.7	-0.0378
2019-01-20 01:15:00	0	0	0	1025.7	65	-0.0378
2019-01-20 01:30:00	0	48	0	1025.7	65.3	-0.0378
2019-01-20 01:45:00	0	0	0	1025.4	65.2	-0.0378
2019-01-20 02:00:00	0	0	0	1025.4	64.7	-0.0357
2019-01-20 02:15:00	0	0	0	1025.7	64.3	-0.0378
2019-01-20 02:30:00	0	0	0	1025.6	64.4	-0.0357
2019-01-20 02:45:00	0	0	0	1025.7	64.3	-0.0378
2019-01-20 03:00:00	0	39	0	1025.8	64.5	-0.0378
2019-01-20 03:15:00	0	0	0	1025.6	64.9	-0.0378
2019-01-20 03:30:00	0	0	0	1025.5	65.4	-0.0378
2019-01-20 03:45:00	0	0	0	1025.3	65.4	-0.0378
2019-01-20 04:00:00	0	0	0	1025.4	65.6	-0.0378
2019-01-20 04:15:00	0	0	0	1025.2	65.9	-0.0357
2019-01-20 04:30:00	0	0	0	1025.2	66.3	-0.0378
2019-01-20 04:45:00	0	0	0	1025.1	66.5	-0.0378
2019-01-20 05:00:00	0	0	0	1025.1	66.7	-0.0378
2019-01-20 05:15:00	0	0	0	1024.8	66.9	-0.0357
2019-01-20 05:30:00	0	0	0	1025.1	67	-0.0378
2019-01-20 05:45:00	0	0	0	1024.8	66.5	-0.0357
2019-01-20 06:00:00	0	0	0	1024.9	66.3	-0.0378
2019-01-20 06:15:00	0	0	0	1024.9	66.5	-0.0378
2019-01-20 06:30:00	0	0	0	1025	66.6	-0.0378
2019-01-20 06:45:00	0	0	0	1024.8	67.3	-0.0378
2019-01-20 07:00:00	0	0	0	1024.9	67.9	-0.0378
2019-01-20 07:15:00	0	0	0	1024.9	68.3	0.034104
2019-01-20 07:30:00	0	0	0	1024.7	68.6	0.387933
2019-01-20 07:45:00	57	0	32	1024.7	68.7	1.01459
2019-01-20 08:00:00	118	0	48	1024.8	68.6	2.14429
2019-01-20 08:15:00	190	0	64	1024.9	68.4	3.55321
2019-01-20 08:30:00	149	0	52	1025	67.8	4.92803
2019-01-20 08:45:00	332	0	86	1024.9	67.3	10.0287
2019-01-20 09:00:00	397	44	94	1025	66.2	13.7929
2019-01-20 09:15:00	461	50	99	1025.1	64	15.7347
2019-01-20 09:30:00	523	86	106	1025.2	62.4	17.8939
2019-01-20 09:45:00	580	0	111	1025.2	61.8	19.8315
2019-01-20 10:00:00	618	0	118	1025.5	61.3	21.5516
2019-01-20 10:15:00	504	74	117	1025.6	60.8	22.7303
2019-01-20 10:30:00	681	75	147	1025.2	60.8	23.7193
2019-01-20 10:45:00	656	0	131	1025.1	60.9	24.6998
2019-01-20 11:00:00	744	114	143	1025	60.6	25.5268
2019-01-20 11:15:00	766	0	139	1024.6	60.4	25.9745
2019-01-20 11:30:00	778	0	144	1024.4	60.4	26.4882
2019-01-20 11:45:00	783	0	145	1024.2	60.2	26.7631
2019-01-20 12:00:00	781	49	154	1023.9	59.8	26.8782
2019-01-20 12:15:00	777	0	154	1023.7	59.7	26.9422
2019-01-20 12:30:00	772	0	163	1023.4	59.5	18.9767
2019-01-20 12:45:00	596	0	199	1023.3	59.3	13.7162
2019-01-20 13:00:00	715	0	167	1023	59.3	13.7055
2019-01-20 13:15:00	696	0	162	1022.9	58.8	15.3532
2019-01-20 13:30:00	660	0	167	1022.9	58.5	15.3319
2019-01-20 13:45:00	626	0	163	1022.7	58.3	23.7193
2019-01-20 14:00:00	480	0	140	1022.7	57.7	23.7748
2019-01-20 14:15:00	429	0	146	1022.5	57.6	22.9499
2019-01-20 14:30:00	471	89	151	1022.5	57.2	21.9715
2019-01-20 14:45:00	416	0	138	1022.5	57.8	20.6777
2019-01-20 15:00:00	391	0	133	1022.7	60.3	19.5586
2019-01-20 15:15:00	341	146	118	1022.6	60.5	17.7682
2019-01-20 15:30:00	288	50	109	1022.6	60.7	15.8797
2019-01-20 15:45:00	226	142	93	1022.6	60.8	13.4988
2019-01-20 16:00:00	178	0	78	1022.4	60.6	5.30104
2019-01-20 16:15:00	125	37	64	1022.4	60.8	4.42926
2019-01-20 16:30:00	81	0	51	1022.5	61	3.11412
2019-01-20 16:45:00	44	67	37	1022.5	61.6	1.71799
2019-01-20 17:00:00	0	0	0	1022.5	61.8	0.379407
2019-01-20 17:15:00	0	0	0	1022.9	62.7	0.0362355
2019-01-20 17:30:00	0	0	0	1022.9	62.5	-0.0546
2019-01-20 17:45:00	0	0	0	1022.9	63.3	-0.0357
2019-01-20 18:00:00	0	56	0	1023	63.8	-0.0378
2019-01-20 18:15:00	0	0	0	1023	64.3	-0.0378
2019-01-20 18:30:00	0	0	0	1023.1	64.7	-0.0378
2019-01-20 18:45:00	0	0	0	1023.1	64.9	-0.0378
2019-01-20 19:00:00	0	0	0	1023.2	65.2	-0.0378
2019-01-20 19:15:00	0	0	0	1023.4	65.3	-0.0378
2019-01-20 19:30:00	0	0	0	1023.4	65.4	-0.0378
2019-01-20 19:45:00	0	0	0	1023.2	65.3	-0.0378
2019-01-20 20:00:00	0	0	0	1023.2	65.6	-0.0378
2019-01-20 20:15:00	0	0	0	1023.2	65.9	-0.0357
2019-01-20 20:30:00	0	0	0	1023.3	66.4	-0.0378
2019-01-20 20:45:00	0	30	0	1023.2	66.8	-0.0378
2019-01-20 21:00:00	0	0	0	1023.3	67.2	-0.0378
2019-01-20 21:15:00	0	0	0	1023.3	67.5	-0.0378
2019-01-20 21:30:00	0	0	0	1023.3	67.5	-0.0378
2019-01-20 21:45:00	0	0	0	1023.3	67.4	-0.0336
2019-01-20 22:00:00	0	0	0	1023.4	67.3	-0.0378
2019-01-20 22:15:00	0	0	0	1023.3	67.2	-0.0357
2019-01-20 22:30:00	0	0	0	1023.3	67.5	-0.0378
2019-01-20 22:45:00	0	0	0	1023.3	67.7	-0.0378
2019-01-20 23:00:00	0	0	0	1023.3	68	-0.0378
2019-01-20 23:15:00	0	0	0	1023.2	68.3	-0.0378
2019-01-20 23:30:00	0	0	0	1023.2	68.5	-0.0378
2019-01-20 23:45:00	0	0	0	1023	68.6	-0.0378
2019-01-21	0	0	0	1023	68.8	-0.0378
2019-01-21 00:15:00	0	0	0	1022.8	68.8	-0.0378
2019-01-21 00:30:00	0	0	0	1022.9	68.9	-0.0378
2019-01-21 00:45:00	0	0	0	1023	69	-0.0378
2019-01-21 01:00:00	0	0	0	1023	68.9	-0.0378
2019-01-21 01:15:00	0	0	0	1022.9	68.7	-0.0336
2019-01-21 01:30:00	0	0	0	1022.9	68.6	-0.0378
2019-01-21 01:45:00	0	0	0	1022.9	68.8	-0.0378
2019-01-21 02:00:00	0	0	0	1022.8	69.1	-0.0378
2019-01-21 02:15:00	0	0	0	1022.9	69.2	-0.0378
2019-01-21 02:30:00	0	0	0	1022.8	69.3	-0.0378
2019-01-21 02:45:00	0	0	0	1022.9	69.2	-0.0378
2019-01-21 03:00:00	0	0	0	1022.9	69	-0.0378
2019-01-21 03:15:00	0	0	0	1022.6	68.9	-0.0357
2019-01-21 03:30:00	0	0	0	1022.6	68.8	-0.0357
2019-01-21 03:45:00	0	0	0	1022.4	68.5	-0.0357
2019-01-21 04:00:00	0	0	0	1022	68.4	-0.0378
2019-01-21 04:15:00	0	0	0	1021.9	68.5	-0.0378
2019-01-21 04:30:00	0	0	0	1021.4	68.8	-0.0378
2019-01-21 04:45:00	0	0	0	1021	69.2	-0.0378
2019-01-21 05:00:00	0	0	0	1021.1	69.5	-0.0357
2019-01-21 05:15:00	0	0	0	1021.5	69.7	-0.0378
2019-01-21 05:30:00	0	0	0	1021.6	69.8	-0.0378
2019-01-21 05:45:00	0	0	0	1020.9	70	-0.0336
2019-01-21 06:00:00	0	0	0	1021.4	70.1	-0.0378
2019-01-21 06:15:00	0	0	0	1021.4	70.3	-0.0378
2019-01-21 06:30:00	0	0	0	1021.5	70.3	-0.0378
2019-01-21 06:45:00	0	0	0	1021.6	70.3	-0.0378
2019-01-21 07:00:00	0	0	0	1021.6	70.4	-0.0357
2019-01-21 07:15:00	0	0	0	1021.8	70.4	0.025578
2019-01-21 07:30:00	0	0	0	1022	70.5	0.353829
2019-01-21 07:45:00	0	0	0	1022	70.6	0.93786
2019-01-21 08:00:00	0	0	0	1021.5	70.7	1.73291
2019-01-21 08:15:00	0	0	33	1021.7	71	1.84162
2019-01-21 08:30:00	0	0	37	1022.1	71.2	2.03132
2019-01-21 08:45:00	61	0	75	1022	71.3	6.4286
2019-01-21 09:00:00	63	0	76	1022.1	71.4	8.24464
2019-01-21 09:15:00	76	0	93	1022.1	71.4	10.5126
2019-01-21 09:30:00	56	0	70	1022.1	71.5	10.2291
2019-01-21 09:45:00	73	0	89	1021.8	71.6	7.9846
2019-01-21 10:00:00	83	0	96	1022.1	71.6	11.5527
2019-01-21 10:15:00	115	0	137	1022	71.7	14.5091
2019-01-21 10:30:00	114	0	134	1021.9	71.7	15.4491
2019-01-21 10:45:00	100	0	118	1022.3	71.7	18.4396
2019-01-21 11:00:00	95	0	107	1022	71.7	18.1582
2019-01-21 11:15:00	149	0	165	1021.8	71.6	11.0417
2019-01-21 11:30:00	188	0	199	1021.8	71.5	15.155
2019-01-21 11:45:00	207	0	201	1021.6	71.1	21.0827
2019-01-21 12:00:00	197	0	216	1021.5	70.6	22.4042
2019-01-21 12:15:00	195	0	212	1021.3	70.1	12.9854
2019-01-21 12:30:00	236	30	233	1020.9	69.7	10.5253
2019-01-21 12:45:00	302	0	277	1020.6	69.1	9.81129
2019-01-21 13:00:00	318	0	257	1020.6	68.6	10.6767
2019-01-21 13:15:00	431	0	296	1020.2	68.2	10.3868
2019-01-21 13:30:00	270	0	234	1020.5	67.5	11.4483
2019-01-21 13:45:00	266	0	236	1020.5	67.4	14.3088
2019-01-21 14:00:00	450	0	270	1020.4	67.1	9.47239
2019-01-21 14:15:00	289	0	237	1020.4	66.3	6.50747
2019-01-21 14:30:00	282	0	211	1020.3	66.2	7.61585
2019-01-21 14:45:00	345	36	185	1020.2	66.4	5.25841
2019-01-21 15:00:00	296	30	172	1020.2	66.1	3.42958
2019-01-21 15:15:00	231	32	161	1020.3	66	2.96278
2019-01-21 15:30:00	183	0	144	1020.5	66.5	4.05624
2019-01-21 15:45:00	128	42	106	1020.6	66.8	2.81997
2019-01-21 16:00:00	63	35	66	1020.4	67.3	1.99295
2019-01-21 16:15:00	0	0	32	1020.6	67.7	1.27677
2019-01-21 16:30:00	0	0	31	1020.7	68.2	0.66716
2019-01-21 16:45:00	0	0	0	1020.7	68.7	0.366618
2019-01-21 17:00:00	0	0	0	1020.8	68.9	0.063945
2019-01-21 17:15:00	0	0	0	1020.7	69.1	-0.0252
2019-01-21 17:30:00	0	0	0	1020.9	69.3	-0.0357
2019-01-21 17:45:00	0	0	0	1020.7	69.7	-0.0378
2019-01-21 18:00:00	0	0	0	1020.9	69.9	-0.0378
2019-01-21 18:15:00	0	0	0	1021.1	70.1	-0.0336
2019-01-21 18:30:00	0	0	0	1021.4	70.2	-0.0357
2019-01-21 18:45:00	0	0	0	1021.6	70.3	-0.0378
2019-01-21 19:00:00	0	0	0	1021.6	70.5	-0.0378
2019-01-21 19:15:00	0	0	0	1021.5	70.7	-0.0336
2019-01-21 19:30:00	0	0	0	1021.7	70.8	-0.0378
[truncated: 18,353 more rows]
