# Supplementary material
Source: PeerJ journal article supplement (doi:10.7717/peerj-cs.3610)
Supplement: Solar_station_site_4_Nominal_capacity130MW.xlsx [file Solar_station_site_4_Nominal_capacity130MW.xlsx]

## Sheet: Sheet1
Time(year-month-day h:m:s)	Total solar irradiance (W/m2)	Direct normal irradiance (W/m2)	Global horizontal irradiance (W/m2)	Air temperature (°C)	Atmosphere (hpa)	Relative humidity (%)	Power (MW)
2019-01-01	0	0	0	-1.33295	1005.94	87.6949	-0.273
2019-01-01 00:15:00	0	0	0	-2.89027	995.881	94.5781	-0.285
2019-01-01 00:30:00	0	0	0	-3.09149	1022.68	84.0122	-0.314
2019-01-01 00:45:00	0	0	0	-4.1234	995.285	91.0764	-0.314
2019-01-01 01:00:00	0	0	0	-4.2269	1098.33	91.8045	-0.314
2019-01-01 01:15:00	0	0	0	-4.56346	1000.44	94.7949	-0.314
2019-01-01 01:30:00	0	0	0	-4.37113	1003.97	98.1727	-0.314
2019-01-01 01:45:00	0	0	0	-5.17712	1062.69	80.4716	-0.303
2019-01-01 02:00:00	0	0	0	-4.3117	1087.83	95.5387	-0.314
2019-01-01 02:15:00	0	0	0	-5.31874	1093.23	84.587	-0.314
2019-01-01 02:30:00	0	0	0	-4.86312	1081.96	85.6529	-0.314
2019-01-01 02:45:00	0	0	0	-5.15968	1002.69	98.1474	-0.314
2019-01-01 03:00:00	0	0	0	-4.89016	1079.37	81.4052	-0.314
2019-01-01 03:15:00	0	0	0	-4.51463	1019.27	87.5839	-0.314
2019-01-01 03:30:00	0	0	0	-4.95159	1073.23	89.0933	-0.314
2019-01-01 03:45:00	0	0	0	-4.33766	1013.43	100	-0.314
2019-01-01 04:00:00	0	0	0	-4.09125	1043.16	100	-0.314
2019-01-01 04:15:00	0	0	0	-4.83739	1071.92	99.0483	-0.314
2019-01-01 04:30:00	0	0	0	-4.1981	1015.81	95.9143	-0.314
2019-01-01 04:45:00	0	0	0	-4.47421	994.396	84.3473	-0.314
2019-01-01 05:00:00	0	0	0	-4.76504	1008.29	92.8428	-0.314
2019-01-01 05:15:00	0	0	0	-4.72252	1028.54	100	-0.314
2019-01-01 05:30:00	0	0	0	-3.76406	1071.48	85.3076	-0.314
2019-01-01 05:45:00	0	0	0	-4.63643	1070.94	99.7657	-0.314
2019-01-01 06:00:00	0	0	0	-3.85824	1040.8	95.2605	-0.314
2019-01-01 06:15:00	0	0	0	-4.3576	1039.95	100	-0.314
2019-01-01 06:30:00	0	0	0	-4.12136	1015.73	86.367	-0.314
2019-01-01 06:45:00	0	0	0	-3.77671	1058.2	97.782	-0.314
2019-01-01 07:00:00	0	0	0	-4.73258	1062.25	100	-0.314
2019-01-01 07:15:00	0	0	0	-4.69935	1084.32	99.6745	-0.314
2019-01-01 07:30:00	0.8	0	0	-4.6797	1069.24	93.3869	0.085
2019-01-01 07:45:00	9.867	16.9752	2.53652	-3.95423	1003.09	100	1.77
2019-01-01 08:00:00	28.733	36.0185	5.38208	-4.40432	1003.53	100	5.391
2019-01-01 08:15:00	66.8	70.0355	10.4651	-4.47337	1015.49	93.7269	9.3
2019-01-01 08:30:00	128.867	82.9995	12.4022	-3.5238	1082.8	95.8212	13.66
2019-01-01 08:45:00	197.133	130.792	19.5436	-3.97759	1026.19	91.0312	20.111
2019-01-01 09:00:00	240.067	148.589	22.203	-3.25868	1043.38	86.4753	27.896
2019-01-01 09:15:00	316.867	185.213	27.6754	-2.73835	1026.17	99.478	39.923
2019-01-01 09:30:00	366.467	207.055	30.9392	-2.57312	1066.91	95.072	49.526
2019-01-01 09:45:00	413.133	216.155	32.299	-2.20634	1087.25	98.2621	56.224
2019-01-01 10:00:00	444.667	230.531	34.4472	-1.69385	1082.67	90.0765	59.531
2019-01-01 10:15:00	448.133	263.894	39.4325	-1.17022	1008.71	89.0329	66.781
2019-01-01 10:30:00	440.533	279.754	41.8023	-0.704433	1045.35	85.4885	69.548
2019-01-01 10:45:00	493.4	280.292	41.8827	-0.40381	1017.31	75.9724	67.782
2019-01-01 11:00:00	575.4	360.321	53.8411	-0.150481	1045.55	79.812	60.285
2019-01-01 11:15:00	633.067	308.899	46.1573	0.0643043	1021.14	75.8159	61.382
2019-01-01 11:30:00	378	317.258	47.4064	0.27002	1097.75	83.188	58.911
2019-01-01 11:45:00	229.933	351.755	52.561	0.475229	1010.77	77.2144	70.871
2019-01-01 12:00:00	387	413.478	61.784	0.773948	1035.91	76.3261	61.327
2019-01-01 12:15:00	536.133	382.651	57.1777	0.999642	1001.12	85.1028	60.222
2019-01-01 12:30:00	470.2	445.422	66.5573	1.13628	1047.36	82.401	65.654
2019-01-01 12:45:00	454.4	446.35	66.6959	1.32946	1088.01	76.8774	62.883
2019-01-01 13:00:00	338.267	401.225	59.9531	1.42649	1049.54	73.9467	42.613
2019-01-01 13:15:00	316.667	465.598	69.5721	1.8363	1042.33	75.4037	47.279
2019-01-01 13:30:00	325.067	407.083	60.8286	1.76619	1002.82	76.0188	38.231
2019-01-01 13:45:00	311.133	449.269	67.1321	2.03017	1047.36	72.7258	33.904
2019-01-01 14:00:00	278.6	353.64	52.8427	1.97456	1037.19	75.4817	31.092
2019-01-01 14:15:00	258.467	322.597	48.2042	2.09529	1049.53	74.9546	28.273
2019-01-01 14:30:00	232.6	301.189	45.0052	2.41035	1075.34	77.4913	24.168
2019-01-01 14:45:00	212.267	319.837	47.7918	2.09612	1002.83	66.3336	20.891
2019-01-01 15:00:00	172.533	264.808	39.569	2.71037	1042.69	80.0175	16.025
2019-01-01 15:15:00	123.6	246.882	36.8904	2.83477	1043.7	78.9033	10.29
2019-01-01 15:30:00	104.467	237.4	35.4735	2.61621	1042.33	73.6733	10.634
2019-01-01 15:45:00	83.667	169.585	25.3403	2.67321	1034.8	73.5324	8.288
2019-01-01 16:00:00	58.467	154.001	23.0116	2.95397	1072.41	69.6284	4.522
2019-01-01 16:15:00	42.733	131.71	19.6808	3.07901	1090.24	73.1485	4.408
2019-01-01 16:30:00	39.933	74.884	11.1896	3.03185	1024.91	73.3151	3.887
2019-01-01 16:45:00	30.8	56.209	8.39905	2.6698	1080.59	73.9203	1.445
2019-01-01 17:00:00	16.067	24.465	3.65569	2.68791	1028.67	63.5372	0.842
2019-01-01 17:15:00	4.6	7.41509	1.108	2.70293	1068.82	61.7628	-0.24
2019-01-01 17:30:00	0.133	0	0	2.43426	1031.9	71.6433	-0.273
2019-01-01 17:45:00	0	0	0	2.32504	1049.36	63.4252	-0.273
2019-01-01 18:00:00	0	0	0	2.16479	1042.39	76.671	-0.244
2019-01-01 18:15:00	0	0	0	1.88518	992.361	73.0145	-0.244
2019-01-01 18:30:00	0	0	0	1.60737	1045.18	73.2767	-0.244
2019-01-01 18:45:00	0	0	0	1.20275	1083.9	80.9201	-0.244
2019-01-01 19:00:00	0	0	0	0.735126	1076.05	70.6777	-0.244
2019-01-01 19:15:00	0	0	0	0.521745	1063.27	71.1664	-0.244
2019-01-01 19:30:00	0	0	0	0.27472	1055.99	69.5996	-0.244
2019-01-01 19:45:00	0	0	0	0.0636512	1019.67	70.9733	-0.244
2019-01-01 20:00:00	0	0	0	-0.0116936	1001.27	71.8401	-0.244
2019-01-01 20:15:00	0	0	0	-0.0388377	1015.39	81.1335	-0.244
2019-01-01 20:30:00	0	0	0	-0.0411429	1083.8	80.7737	-0.273
2019-01-01 20:45:00	0	0	0	-0.0696712	1091.26	86.536	-0.273
2019-01-01 21:00:00	0	0	0	-0.081296	997.352	80.7964	-0.273
2019-01-01 21:15:00	0	0	0	-0.111857	996.909	81.4947	-0.244
2019-01-01 21:30:00	0	0	0	-0.123836	1020.97	81.5914	-0.244
2019-01-01 21:45:00	0	0	0	-0.115198	1083.92	84.0412	-0.244
2019-01-01 22:00:00	0	0	0	-0.123233	1017.85	90.6622	-0.244
2019-01-01 22:15:00	0	0	0	-0.15075	1044.85	89.3487	-0.244
2019-01-01 22:30:00	0	0	0	-0.136172	1023.6	81.6408	-0.273
2019-01-01 22:45:00	0	0	0	-0.140888	1049.09	85.3541	-0.244
2019-01-01 23:00:00	0	0	0	-0.161782	1016.11	85.4879	-0.244
2019-01-01 23:15:00	0	0	0	-0.169439	1027.09	87.6497	-0.244
2019-01-01 23:30:00	0	0	0	-0.182993	1043.16	80.7938	-0.244
2019-01-01 23:45:00	0	0	0	-0.194742	1072.59	80.8575	-0.244
2019-01-02 00:00:00	0	0	0	-0.17027	1006.07	80.9416	-0.244
2019-01-02 00:15:00	0	0	0	-0.0586084	1034.34	85.7154	-0.244
2019-01-02 00:30:00	0	0	0	-0.197499	1006.36	72.6965	-0.244
2019-01-02 00:45:00	0	0	0	-0.306441	1015.86	80.5236	-0.244
2019-01-02 01:00:00	0	0	0	-0.461288	1046.43	83.268	-0.244
2019-01-02 01:15:00	0	0	0	-0.570421	1078.86	74.2477	-0.244
2019-01-02 01:30:00	0	0	0	-0.671868	1083.32	80.9661	-0.244
2019-01-02 01:45:00	0	0	0	-0.75688	1012.59	80.3794	-0.244
2019-01-02 02:00:00	0	0	0	-0.765812	1085.83	89.2239	-0.244
2019-01-02 02:15:00	0	0	0	-0.878944	1089.91	83.2081	-0.233
2019-01-02 02:30:00	0	0	0	-0.890959	1061.68	81.8226	-0.244
2019-01-02 02:45:00	0	0	0	-0.776911	1083.34	75.4208	-0.244
2019-01-02 03:00:00	0	0	0	-0.903052	1055.13	87.0184	-0.244
2019-01-02 03:15:00	0	0	0	-0.999561	1036.79	88.7695	-0.244
2019-01-02 03:30:00	0	0	0	-1.01551	1073.88	78.8188	-0.244
2019-01-02 03:45:00	0	0	0	-0.90493	1075.8	82.6057	-0.244
2019-01-02 04:00:00	0	0	0	-1.04523	1027.1	78.2381	-0.244
2019-01-02 04:15:00	0	0	0	-1.00083	1067.99	85.7404	-0.244
2019-01-02 04:30:00	0	0	0	-1.10751	1099.81	76.8902	-0.244
2019-01-02 04:45:00	0	0	0	-1.02051	1008.78	81.2198	-0.244
2019-01-02 05:00:00	0	0	0	-1.15899	1092.83	73.2121	-0.244
2019-01-02 05:15:00	0	0	0	-1.19838	1027.68	84.7514	-0.244
2019-01-02 05:30:00	0	0	0	-1.34092	1034.03	84.5893	-0.244
2019-01-02 05:45:00	0	0	0	-1.49564	1017.33	83.4679	-0.244
2019-01-02 06:00:00	0	0	0	-1.86558	1026.59	89.5982	-0.244
2019-01-02 06:15:00	0	0	0	-1.67694	1089.99	84.3512	-0.244
2019-01-02 06:30:00	0	0	0	-2.2862	1067.18	84.066	-0.244
2019-01-02 06:45:00	0	0	0	-2.24925	1051.98	94.0404	-0.244
2019-01-02 07:00:00	0	0	0	-2.28634	1042.14	85.6247	-0.244
2019-01-02 07:15:00	0	0	0	-2.52706	1051.81	93.3784	-0.273
2019-01-02 07:30:00	0	0	0	-2.48279	1049.26	82.9888	-0.262
2019-01-02 07:45:00	3.067	12.3996	1.85282	-2.79677	1086.08	80.7723	0.151
2019-01-02 08:00:00	11.133	29.9165	4.47028	-2.9433	1045.5	86.5273	0.599
2019-01-02 08:15:00	20.467	54.1315	8.08862	-3.01686	1038.48	86.9373	2.136
2019-01-02 08:30:00	31.667	74.6039	11.1477	-2.4583	1000.75	87.3709	3.436
2019-01-02 08:45:00	43.2	110.499	16.5114	-2.27098	1098.65	85.9216	4.585
2019-01-02 09:00:00	50.867	129.633	19.3704	-1.78066	1030.05	86.1841	5.465
2019-01-02 09:15:00	60.333	151.399	22.6228	-1.25013	1061.46	89.7862	6.946
2019-01-02 09:30:00	74.8	176.892	26.4321	-0.746552	1100.31	80.7333	8.336
2019-01-02 09:45:00	82.4	187.931	28.0816	-0.311055	1063.35	85.0079	9.289
2019-01-02 10:00:00	92.733	234.389	35.0236	0.273406	1020.93	81.8744	10.187
2019-01-02 10:15:00	97.733	243.301	36.3553	0.759366	1024.27	83.1063	11.088
2019-01-02 10:30:00	112.067	292.469	43.7023	1.18777	1059.54	77.8077	13.065
2019-01-02 10:45:00	123.333	288.938	43.1747	1.71138	1087.57	76.7659	14.48
2019-01-02 11:00:00	139.4	338.04	50.5117	1.67454	1041.62	78.2313	16.546
2019-01-02 11:15:00	163.267	357.534	53.4247	2.011	1024.57	70.7856	19.154
2019-01-02 11:30:00	169.133	356.433	53.2602	2.05063	1027.62	82.988	19.402
2019-01-02 11:45:00	202.4	353.156	52.7705	2.33069	1071.98	71.0654	24.489
2019-01-02 12:00:00	239.267	370.667	55.3871	2.59797	1053.86	81.9021	28.746
2019-01-02 12:15:00	265.467	380.29	56.8249	2.90582	1017.14	79.7647	29.991
2019-01-02 12:30:00	248.467	451.736	67.5007	3.08762	1023.59	74.5821	22.369
2019-01-02 12:45:00	229.067	383.073	57.2408	3.16575	1044	73.6262	27.726
2019-01-02 13:00:00	243.133	394.666	58.9731	3.28962	1002.54	65.0994	27.937
2019-01-02 13:15:00	244.467	437.697	65.403	3.35342	1047.66	74.8115	24.874
2019-01-02 13:30:00	244.867	390.22	58.3087	3.42631	1043.14	74.4038	27.719
2019-01-02 13:45:00	239.6	371.812	55.5581	3.12881	999.703	72.4821	24.608
2019-01-02 14:00:00	216.4	439.026	65.6016	3.47247	1001.18	74.0956	22.298
2019-01-02 14:15:00	185.933	346.555	51.7841	2.99765	1026.43	67.7206	18.459
2019-01-02 14:30:00	183	338.173	50.5317	3.38942	1015.74	68.4556	19.997
2019-01-02 14:45:00	195.867	284.731	42.546	3.08458	1092.85	68.8855	20.181
2019-01-02 15:00:00	159.333	246.827	36.8822	3.23255	1093.57	67.793	15.448
2019-01-02 15:15:00	131.667	264.989	39.5961	2.71529	1010.24	75.4	12.548
2019-01-02 15:30:00	104.933	199.917	29.8726	2.69513	1037.7	64.1891	11.048
2019-01-02 15:45:00	98.733	179.982	26.8939	2.75796	1008.49	66.1991	10.035
2019-01-02 16:00:00	87.133	156.743	23.4214	2.78147	1074.94	66.1378	8.664
2019-01-02 16:15:00	77.333	137.86	20.5997	2.26983	1021.11	76.0427	7.161
2019-01-02 16:30:00	60.867	92.6733	13.8477	2.2354	1067.99	66.766	4.929
2019-01-02 16:45:00	45.267	51.574	7.70645	2.25361	1097.22	67.3123	3.384
2019-01-02 17:00:00	30.267	30.6434	4.57889	2.12857	1039.86	73.072	1.829
2019-01-02 17:15:00	16.467	8.0893	1.20875	2.33854	1016.86	67.9513	0.277
2019-01-02 17:30:00	4.333	0	0	2.38227	1021.44	64.8903	-0.24
2019-01-02 17:45:00	0	0	0	2.24468	1042.84	65.2309	-0.273
2019-01-02 18:00:00	0	0	0	2.37104	1083.83	70.9256	-0.273
2019-01-02 18:15:00	0	0	0	2.09556	1051.48	65.3915	-0.273
2019-01-02 18:30:00	0	0	0	2.16587	1060.95	67.2996	-0.244
2019-01-02 18:45:00	0	0	0	2.27424	1017.92	64.0063	-0.244
2019-01-02 19:00:00	0	0	0	2.08778	1006.35	66.698	-0.273
2019-01-02 19:15:00	0	0	0	2.29203	1065.94	70.4713	-0.273
2019-01-02 19:30:00	0	0	0	1.94432	1051.43	73.8628	-0.273
2019-01-02 19:45:00	0	0	0	2.04486	1041.61	75.4003	-0.273
2019-01-02 20:00:00	0	0	0	2.13893	1071.21	68.7282	-0.273
2019-01-02 20:15:00	0	0	0	1.94173	1051.33	79.9937	-0.273
2019-01-02 20:30:00	0	0	0	1.62021	996.076	77.6698	-0.285
2019-01-02 20:45:00	0	0	0	1.62548	1050.26	72.6925	-0.303
2019-01-02 21:00:00	0	0	0	1.46752	1017.91	83.3049	-0.314
2019-01-02 21:15:00	0	0	0	1.23871	1080.4	80.0758	-0.314
2019-01-02 21:30:00	0	0	0	0.888011	1075.68	72.6025	-0.244
2019-01-02 21:45:00	0	0	0	0.737174	1043.56	70.7961	-0.273
2019-01-02 22:00:00	0	0	0	0.429507	1051.97	74.614	-0.273
2019-01-02 22:15:00	0	0	0	0.214127	1090.77	79.5416	-0.244
2019-01-02 22:30:00	0	0	0	-0.0253369	1071.04	79.8429	-0.244
2019-01-02 22:45:00	0	0	0	-0.272028	1060.03	83.5725	-0.273
2019-01-02 23:00:00	0	0	0	-0.491228	1002.71	70.8649	-0.273
2019-01-02 23:15:00	0	0	0	-0.603613	1085.3	78.6451	-0.285
2019-01-02 23:30:00	0	0	0	-0.825667	1064.03	87.6408	-0.273
2019-01-02 23:45:00	0	0	0	-0.934058	1048	84.4964	-0.273
2019-01-03 00:00:00	0	0	0	-1.27815	999.49	75.9859	-0.273
2019-01-03 00:15:00	0	0	0	-1.35784	1070.87	86.2825	-0.273
2019-01-03 00:30:00	0	0	0	-1.43257	1026.76	73.3222	-0.273
2019-01-03 00:45:00	0	0	0	-1.76677	1051.14	71.9165	-0.273
2019-01-03 01:00:00	0	0	0	-1.90891	1069.04	74.9969	-0.273
2019-01-03 01:15:00	0	0	0	-2.09862	991.285	79.6826	-0.273
2019-01-03 01:30:00	0	0	0	-1.97635	1026.53	84.4554	-0.273
2019-01-03 01:45:00	0	0	0	-2.16745	1049.65	88.7201	-0.273
2019-01-03 02:00:00	0	0	0	-2.47767	995.102	82.3361	-0.273
2019-01-03 02:15:00	0	0	0	-2.35642	1022.07	73.8036	-0.273
2019-01-03 02:30:00	0	0	0	-2.2808	1056.48	77.3237	-0.273
2019-01-03 02:45:00	0	0	0	-2.3917	1050.33	80.6301	-0.285
2019-01-03 03:00:00	0	0	0	-2.2342	1010.05	85.0795	-0.273
2019-01-03 03:15:00	0	0	0	-2.1633	1067.25	90.4735	-0.273
2019-01-03 03:30:00	0	0	0	-2.19325	989.089	89.7219	-0.273
2019-01-03 03:45:00	0	0	0	-2.80094	1071.03	84.4271	-0.273
2019-01-03 04:00:00	0	0	0	-2.49586	1028.26	84.782	-0.273
2019-01-03 04:15:00	0	0	0	-2.82558	1035.46	87.3903	-0.273
2019-01-03 04:30:00	0	0	0	-2.71511	1065.28	78.1787	-0.273
2019-01-03 04:45:00	0	0	0	-2.51901	998.652	83.1752	-0.273
2019-01-03 05:00:00	0	0	0	-2.38391	984.167	77.4449	-0.273
2019-01-03 05:15:00	0	0	0	-2.41803	1030.26	77.3669	-0.273
2019-01-03 05:30:00	0	0	0	-2.68212	1046.75	89.0427	-0.273
2019-01-03 05:45:00	0	0	0	-2.64631	1015.14	79.2781	-0.273
2019-01-03 06:00:00	0	0	0	-2.65262	1007.92	76.5836	-0.273
2019-01-03 06:15:00	0	0	0	-2.00669	997.353	81.1163	-0.273
2019-01-03 06:30:00	0	0	0	-2.426	1043.21	78.111	-0.273
2019-01-03 06:45:00	0	0	0	-2.28249	988.743	83.4415	-0.244
2019-01-03 07:00:00	0	0	0	-1.79215	1038.82	90.941	-0.244
2019-01-03 07:15:00	0	0	0	-1.72297	1076.74	85.9914	-0.273
2019-01-03 07:30:00	0.067	0	0	-1.53853	1005.95	86.903	-0.188
2019-01-03 07:45:00	4.133	25.7195	3.84314	-1.42425	984.005	73.1555	0.288
2019-01-03 08:00:00	13.133	52.7237	7.87825	-1.16822	999.477	81.2061	1.156
2019-01-03 08:15:00	24.533	79.0768	11.8161	-0.876431	998.685	79.9838	2.801
2019-01-03 08:30:00	36.867	134.169	20.0482	-0.462026	988.723	72.4211	4.304
2019-01-03 08:45:00	51.4	169.407	25.3136	-0.0126875	1039.33	69.6192	5.886
2019-01-03 09:00:00	62.733	229.712	34.3248	0.551671	1063.76	66.303	7.035
2019-01-03 09:15:00	79.133	236.934	35.4039	1.25644	991.047	69.1217	9.566
2019-01-03 09:30:00	98.6	273.623	40.8862	1.97436	1026.53	69.3986	11.62
2019-01-03 09:45:00	120.933	327.167	48.8871	2.95645	1063.29	60.9778	14.591
2019-01-03 10:00:00	146.4	306.421	45.7871	3.57003	1002.96	57.7544	17.58
2019-01-03 10:15:00	173.933	396.198	59.202	3.65244	989.364	64.8996	20.961
2019-01-03 10:30:00	190.067	361.983	54.0894	4.80465	1057.67	60.5959	21.87
2019-01-03 10:45:00	211.267	413.841	61.8383	5.10398	1051.47	58.8666	25.908
2019-01-03 11:00:00	227	441.575	65.9824	5.55578	1051.93	53.1579	24.194
2019-01-03 11:15:00	260.333	405.787	60.6348	5.8287	1016.16	56.4591	34.709
2019-01-03 11:30:00	317.667	464.495	69.4074	5.68016	1051.38	57.8807	37.636
2019-01-03 11:45:00	298.933	463.181	69.2109	6.98457	1079.55	56.3027	32.625
2019-01-03 12:00:00	309.2	459.306	68.6319	6.13884	988.962	55.595	35.116
2019-01-03 12:15:00	294.8	550.612	82.2753	6.90673	1005.04	58.0737	31.783
2019-01-03 12:30:00	228.267	532.673	79.5948	7.45081	1016.61	63.2694	26.252
2019-01-03 12:45:00	253.133	592.784	88.5769	8.41128	988.272	60.3778	26.717
2019-01-03 13:00:00	257.867	538.183	80.4181	8.72966	1066.2	57.791	29.289
2019-01-03 13:15:00	259.6	563.72	84.234	7.3265	1061.91	62.5897	31.469
2019-01-03 13:30:00	323.6	492.845	73.6436	7.93018	1074.21	56.4235	43.241
2019-01-03 13:45:00	374.667	474.854	70.9552	8.19352	1048.25	61.9862	56.66
2019-01-03 14:00:00	521.8	518.116	77.4197	8.43284	1010.54	50.9401	68.617
2019-01-03 14:15:00	482.667	426.814	63.7768	7.87516	1004.9	57.3572	37.795
2019-01-03 14:30:00	225.533	408.728	61.0742	7.83582	1068.95	57.3027	25.31
2019-01-03 14:45:00	197.933	380.581	56.8684	8.6574	1018.39	57.8648	17.31
2019-01-03 15:00:00	135.133	321.674	48.0662	8.75857	988.9	51.6949	13.752
2019-01-03 15:15:00	117.733	290.543	43.4144	8.43015	1013.35	59.2809	11.092
2019-01-03 15:30:00	80.8	252.869	37.7851	7.75955	1031.04	54.3239	6.104
2019-01-03 15:45:00	79.6	212.199	31.7079	8.67688	1059.15	56.9124	6.052
2019-01-03 16:00:00	49	177.088	26.4615	8.41245	1008.81	53.6916	4.537
2019-01-03 16:15:00	42.933	153.036	22.8674	8.42073	1079.85	64.5445	3.362
2019-01-03 16:30:00	31.6	105.321	15.7376	7.97371	1016.3	62.5418	2.173
2019-01-03 16:45:00	19.267	68.3814	10.2179	8.59792	993.179	64.2046	0.805
2019-01-03 17:00:00	13.733	30.2365	4.5181	6.79396	996.026	67.4779	0.491
2019-01-03 17:15:00	7.067	10.3596	1.54799	6.70888	987.152	59.392	-0.211
2019-01-03 17:30:00	0.6	0	0	7.42407	983.407	59.9867	-0.044
2019-01-03 17:45:00	0	0	0	7.51343	1036.16	60.0727	-0.096
2019-01-03 18:00:00	0	0	0	7.14788	989.493	62.7163	-0.244
2019-01-03 18:15:00	0	0	0	7.07384	1068.5	64.7474	-0.244
2019-01-03 18:30:00	0	0	0	6.7342	1057.78	67.7584	-0.244
2019-01-03 18:45:00	0	0	0	7.04604	1065.27	61.7452	-0.244
2019-01-03 19:00:00	0	0	0	6.50199	1037.45	76.5188	-0.244
2019-01-03 19:15:00	0	0	0	5.86077	981.509	76.1287	-0.244
2019-01-03 19:30:00	0	0	0	5.11231	1019.99	63.4461	-0.244
2019-01-03 19:45:00	0	0	0	5.89779	1026.62	65.2423	-0.244
2019-01-03 20:00:00	0	0	0	5.40117	1023.37	74.9521	-0.244
2019-01-03 20:15:00	0	0	0	6.17265	1060.97	76.1528	-0.244
2019-01-03 20:30:00	0	0	0	6.15896	1048.46	77.4047	-0.244
2019-01-03 20:45:00	0	0	0	5.45469	1001.47	66.5334	-0.273
2019-01-03 21:00:00	0	0	0	5.34007	1049.02	78.1866	-0.273
2019-01-03 21:15:00	0	0	0	4.84785	1050.45	77.6551	-0.273
2019-01-03 21:30:00	0	0	0	4.95366	1023.69	82.7612	-0.244
2019-01-03 21:45:00	0	0	0	5.50792	1026.68	79.2997	-0.244
2019-01-03 22:00:00	0	0	0	5.11997	1060.1	86.9644	-0.273
2019-01-03 22:15:00	0	0	0	5.91949	1005.23	80.4651	-0.244
2019-01-03 22:30:00	0	0	0	4.83283	1073.82	82.3085	-0.244
2019-01-03 22:45:00	0	0	0	5.4764	1011.29	81.8274	-0.244
2019-01-03 23:00:00	0	0	0	5.53336	1046.39	81.6774	-0.244
2019-01-03 23:15:00	0	0	0	4.8111	1047.68	88.3528	-0.244
2019-01-03 23:30:00	0	0	0	5.31481	1042.9	75.2265	-0.244
2019-01-03 23:45:00	0	0	0	5.57658	1075.63	72.9971	-0.273
2019-01-04 00:00:00	0	0	0	3.95007	1028.52	75.1383	-0.273
2019-01-04 00:15:00	0	0	0	4.25525	1012.04	85.9294	-0.244
2019-01-04 00:30:00	0	0	0	4.29505	999.897	85.4109	-0.273
2019-01-04 00:45:00	0	0	0	3.72153	989.918	84.094	-0.244
2019-01-04 01:00:00	0	0	0	3.91637	1029.9	91.3507	-0.273
2019-01-04 01:15:00	0	0	0	4.16497	982.629	89.6218	-0.244
2019-01-04 01:30:00	0	0	0	4.06674	1009.2	80.0143	-0.244
2019-01-04 01:45:00	0	0	0	3.86895	1038.68	85.9239	-0.244
2019-01-04 02:00:00	0	0	0	4.19272	1028.6	81.0712	-0.273
2019-01-04 02:15:00	0	0	0	3.39934	980.687	92.0329	-0.273
2019-01-04 02:30:00	0	0	0	3.59918	1034.5	86.1647	-0.244
2019-01-04 02:45:00	0	0	0	3.37674	1013.58	88.4313	-0.273
2019-01-04 03:00:00	0	0	0	3.87636	1010.31	90.1088	-0.273
2019-01-04 03:15:00	0	0	0	3.80743	1011.69	80.0401	-0.273
2019-01-04 03:30:00	0	0	0	3.48843	969.905	88.599	-0.273
2019-01-04 03:45:00	0	0	0	3.75387	1035.39	82.0158	-0.273
2019-01-04 04:00:00	0	0	0	3.9312	962.246	88.8241	-0.273
2019-01-04 04:15:00	0	0	0	3.84761	1049.66	84.7823	-0.273
2019-01-04 04:30:00	0	0	0	3.81198	1038.08	94.3049	-0.273
2019-01-04 04:45:00	0	0	0	3.17655	1056.07	83.2292	-0.273
2019-01-04 05:00:00	0	0	0	3.1937	1043.14	80.1511	-0.273
2019-01-04 05:15:00	0	0	0	3.54106	984.593	78.3353	-0.273
2019-01-04 05:30:00	0	0	0	3.63345	1006.09	79.0317	-0.273
2019-01-04 05:45:00	0	0	0	3.18648	1005.19	93.8305	-0.273
2019-01-04 06:00:00	0	0	0	3.10631	1046.34	89.6467	-0.273
2019-01-04 06:15:00	0	0	0	3.47238	984.556	80.9397	-0.273
2019-01-04 06:30:00	0	0	0	3.65633	1010.09	82.1471	-0.244
2019-01-04 06:45:00	0	0	0	3.67839	1044.09	95.8349	-0.244
2019-01-04 07:00:00	0	0	0	3.72374	1011.9	80.7654	-0.244
2019-01-04 07:15:00	0	0	0	3.5401	961.83	93.3694	-0.273
2019-01-04 07:30:00	0	0	0	3.27332	985.318	79.4569	-0.273
2019-01-04 07:45:00	0.2	0	0	3.66468	1026.52	85.1981	-0.107
2019-01-04 08:00:00	4.133	14.8261	2.21539	3.72012	1012.16	88.1223	0.329
2019-01-04 08:15:00	9.467	24.2466	3.62306	3.55687	1016.68	79.3993	0.828
2019-01-04 08:30:00	15	37.2359	5.56398	3.9178	963.261	83.7503	1.489
2019-01-04 08:45:00	20.4	50.0743	7.48237	3.36845	989.479	91.8348	2.42
2019-01-04 09:00:00	30.467	60.6842	9.06776	4.3517	1028.64	92.2191	3.226
2019-01-04 09:15:00	35.267	90.6749	13.5491	4.40737	1040.76	84.3052	3.743
2019-01-04 09:30:00	39.533	93.0467	13.9035	4.50431	1054.59	78.4627	4.123
2019-01-04 09:45:00	49.267	98.5649	14.7281	5.09535	992.034	72.5919	6.736
2019-01-04 10:00:00	64.4	106.262	15.8782	5.02246	992.482	80.9923	7.441
2019-01-04 10:15:00	79.867	130.038	19.431	5.26697	1037.7	85.8519	9.78
2019-01-04 10:30:00	89.667	133.32	19.9214	5.27314	1021.25	77.9067	10.275
2019-01-04 10:45:00	95.533	171.429	25.6158	4.76805	1014.22	76.68	12.03
2019-01-04 11:00:00	116.8	171.414	25.6136	4.88737	1046.22	70.2162	14.07
2019-01-04 11:15:00	158.333	164.069	24.5161	4.92595	968.67	68.5987	21.075
2019-01-04 11:30:00	204.667	219.617	32.8163	5.47969	1054.32	72.5251	21.7
2019-01-04 11:45:00	196.933	235.301	35.1599	6.28039	1057.75	76.7547	23.765
2019-01-04 12:00:00	197.333	245.274	36.6501	5.30814	972.759	77.6319	26.965
2019-01-04 12:15:00	279.133	217.594	32.514	6.2661	1046.23	75.9592	30.59
2019-01-04 12:30:00	220.6	217.174	32.4512	6.75454	1058.82	70.3048	22.609
2019-01-04 12:45:00	219.733	251.407	37.5665	5.86054	1021.97	81.8344	19.945
2019-01-04 13:00:00	181.067	240.444	35.9284	6.95373	1025.91	74.7234	18.153
2019-01-04 13:15:00	140.333	258.713	38.6583	6.63064	960.652	77.8748	14.639
2019-01-04 13:30:00	129.2	260.255	38.8887	6.18496	1056.39	75.992	14.757
2019-01-04 13:45:00	121.867	262.607	39.2401	6.94698	983.413	71.1808	11.321
2019-01-04 14:00:00	109.2	238.518	35.6407	5.61832	1058.17	70.121	12.304
2019-01-04 14:15:00	106.267	236.177	35.2909	6.32746	1008.51	70.4253	10.479
2019-01-04 14:30:00	96.867	179.817	26.8692	5.80124	1024.86	68.2061	9.695
2019-01-04 14:45:00	85.333	173.809	25.9715	5.83435	1010.65	77.9702	8.609
2019-01-04 15:00:00	74.267	152.571	22.7979	6.17008	1013.85	71.56	7.56
2019-01-04 15:15:00	66.133	127.93	19.1159	7.05079	980.2	70.5754	6.071
2019-01-04 15:30:00	53.8	106.899	15.9734	6.79664	1045.56	78.9421	4.87
2019-01-04 15:45:00	43.333	98.9449	14.7849	5.66561	1048.18	80.0756	3.654
2019-01-04 16:00:00	33.8	85.02	12.7041	5.69302	1028.49	72.8534	1.792
2019-01-04 16:15:00	24.8	64.5517	9.64565	5.94175	996.261	79.2234	1.404
2019-01-04 16:30:00	17.8	44.7426	6.68567	6.49258	966.807	82.1893	0.861
2019-01-04 16:45:00	10.867	29.2003	4.36326	6.53618	974.25	79.8708	0.248
2019-01-04 17:00:00	4.467	16.6228	2.48387	6.5011	1008.29	77.4304	-0.14
2019-01-04 17:15:00	0.8	0	0	6.88669	993.164	78.3415	-0.303
2019-01-04 17:30:00	0	0	0	6.39055	968.467	80.5331	-0.285
2019-01-04 17:45:00	0	0	0	6.34219	992.446	83.0225	-0.273
2019-01-04 18:00:00	0	0	0	6.04627	961.445	67.835	-0.273
2019-01-04 18:15:00	0	0	0	6.40611	961.029	72.1683	-0.273
2019-01-04 18:30:00	0	0	0	5.84961	981.599	78.4044	-0.273
2019-01-04 18:45:00	0	0	0	6.19013	1019.94	81.9662	-0.273
2019-01-04 19:00:00	0	0	0	5.4554	992.551	74.3629	-0.273
2019-01-04 19:15:00	0	0	0	5.13891	986.071	78.4695	-0.273
2019-01-04 19:30:00	0	0	0	5.06817	1020.55	72.6061	-0.273
2019-01-04 19:45:00	0	0	0	4.96676	992.364	75.6336	-0.273
2019-01-04 20:00:00	0	0	0	4.44	1049.19	77.1263	-0.273
2019-01-04 20:15:00	0	0	0	4.48586	977.742	83.8163	-0.273
2019-01-04 20:30:00	0	0	0	4.30889	1058.15	88.2529	-0.244
2019-01-04 20:45:00	0	0	0	4.29332	1055.42	82.3531	-0.244
2019-01-04 21:00:00	0	0	0	4.0333	1022.67	77.859	-0.244
2019-01-04 21:15:00	0	0	0	4.21388	1037.95	73.9592	-0.244
2019-01-04 21:30:00	0	0	0	4.63126	964.156	87.6926	-0.244
2019-01-04 21:45:00	0	0	0	4.19578	976.71	80.1005	-0.244
2019-01-04 22:00:00	0	0	0	4.45855	1005.72	88.4572	-0.244
2019-01-04 22:15:00	0	0	0	4.0602	1034.08	85.143	-0.244
2019-01-04 22:30:00	0	0	0	3.92177	1025.89	84.2105	-0.244
2019-01-04 22:45:00	0	0	0	3.79445	1040.8	81.7417	-0.244
2019-01-04 23:00:00	0	0	0	3.651	1021.16	75.8734	-0.244
2019-01-04 23:15:00	0	0	0	3.60922	1029.38	75.92	-0.244
2019-01-04 23:30:00	0	0	0	3.28617	1054.5	85.3848	-0.244
2019-01-04 23:45:00	0	0	0	3.79945	968.304	76.7705	-0.273
2019-01-05 00:00:00	0	0	0	3.76077	1035.13	74.0495	-0.273
2019-01-05 00:15:00	0	0	0	4.11836	981.383	66.8861	-0.244
2019-01-05 00:30:00	0	0	0	3.36276	1046.07	57.8088	-0.273
2019-01-05 00:45:00	0	0	0	3.79944	1049.23	70.194	-0.273
2019-01-05 01:00:00	0	0	0	3.99258	1035.27	64.9316	-0.244
2019-01-05 01:15:00	0	0	0	3.67714	992.18	67.8702	-0.273
2019-01-05 01:30:00	0	0	0	3.70049	1058.39	59.5542	-0.273
2019-01-05 01:45:00	0	0	0	3.73517	1008.46	57.6894	-0.273
2019-01-05 02:00:00	0	0	0	3.30948	992.006	68.6805	-0.273
2019-01-05 02:15:00	0	0	0	3.86423	985.081	60.053	-0.273
2019-01-05 02:30:00	0	0	0	3.49015	982.958	68.2733	-0.273
2019-01-05 02:45:00	0	0	0	3.3858	1041.74	69.447	-0.273
2019-01-05 03:00:00	0	0	0	3.91299	1043.68	59.7855	-0.273
2019-01-05 03:15:00	0	0	0	3.92655	1055.27	60.9987	-0.273
2019-01-05 03:30:00	0	0	0	3.6451	1026.14	67.6793	-0.273
2019-01-05 03:45:00	0	0	0	3.80267	1056.13	70.1054	-0.273
2019-01-05 04:00:00	0	0	0	3.82896	1020.55	63.3325	-0.244
2019-01-05 04:15:00	0	0	0	3.69503	986.388	65.4041	-0.244
2019-01-05 04:30:00	0	0	0	4.04951	972.382	56.5421	-0.244
2019-01-05 04:45:00	0	0	0	4.02006	1035.34	56.6257	-0.244
2019-01-05 05:00:00	0	0	0	3.79886	1012.43	66.7557	-0.244
2019-01-05 05:15:00	0	0	0	4.11311	1051.71	65.2543	-0.244
2019-01-05 05:30:00	0	0	0	3.74652	1022.16	60.8459	-0.244
2019-01-05 05:45:00	0	0	0	3.47431	1033.9	61.639	-0.244
2019-01-05 06:00:00	0	0	0	3.43478	1048.84	60.4737	-0.244
2019-01-05 06:15:00	0	0	0	3.80932	1020.05	63.1854	-0.273
2019-01-05 06:30:00	0	0	0	4.12118	1057.12	65.4297	-0.273
2019-01-05 06:45:00	0	0	0	4.07112	1013.12	64.4376	-0.273
2019-01-05 07:00:00	0	0	0	3.93451	1063.17	60.8711	-0.244
2019-01-05 07:15:00	0	0	0	4.15584	1001.56	70.6312	-0.273
2019-01-05 07:30:00	0.267	0	0	3.57072	1059.19	67.1514	-0.033
2019-01-05 07:45:00	7.333	0	0	3.94338	1009.67	62.3327	0.606
2019-01-05 08:00:00	23.333	10.3172	1.54164	3.77914	1042.38	71.1339	2.128
2019-01-05 08:15:00	27.8	20.8085	3.10932	3.90447	1022.03	69.3979	3.713
2019-01-05 08:30:00	54.333	30.9591	4.62607	4.53812	1039.33	58.797	6.669
2019-01-05 08:45:00	65.6	38.6785	5.77954	4.35108	993.559	70.6754	5.428
2019-01-05 09:00:00	55.467	50.078	7.48291	3.9852	966.318	58.4473	5.819
2019-01-05 09:15:00	77.733	61.634	9.20968	4.62552	1058.77	60.3892	9.378
2019-01-05 09:30:00	94.467	67.8936	10.145	4.77712	1039.32	57.5623	7.331
2019-01-05 09:45:00	100.133	63.9611	9.5574	4.45254	974.905	64.942	14.233
2019-01-05 10:00:00	118.267	78.6682	11.755	4.94288	1042.15	58.3696	10.841
2019-01-05 10:15:00	104.933	72.5409	10.8394	4.51632	1050	58.65	11.635
2019-01-05 10:30:00	109.8	86.2268	12.8845	5.22397	974.629	64.0373	11.535
2019-01-05 10:45:00	111.733	88.9961	13.2983	5.38073	1036.81	60.4842	13.287
2019-01-05 11:00:00	117.333	77.9024	11.6406	4.93836	983.944	63.7079	12.16
2019-01-05 11:15:00	122.533	98.9666	14.7881	5.42163	1059.71	56.4732	14.103
2019-01-05 11:30:00	118.8	86.6306	12.9448	5.15566	1055.21	68.39	11.299
2019-01-05 11:45:00	102	91.2982	13.6423	4.4345	977.781	62.2214	10.405
2019-01-05 12:00:00	95.067	107.455	16.0564	4.56441	1011.78	60.3712	10.349
2019-01-05 12:15:00	96	97.1165	14.5117	5.58792	1061.15	63.0019	10.907
2019-01-05 12:30:00	91.867	101.286	15.1347	4.69076	981.221	66.9084	9.725
2019-01-05 12:45:00	79.467	101.885	15.2242	5.60251	1047.85	61.0391	8.845
2019-01-05 13:00:00	82.667	111.847	16.7128	4.74918	1041.71	67.1939	9.714
2019-01-05 13:15:00	87.667	118.068	17.6423	5.5696	991.495	65.224	9.052
2019-01-05 13:30:00	85.8	113.323	16.9333	4.68835	1011.65	58.6263	10.039
2019-01-05 13:45:00	92.6	110.5	16.5114	5.57344	1019.23	66.815	10.279
2019-01-05 14:00:00	87.133	99.1461	14.8149	5.41968	1061.57	62.8511	8.184
2019-01-05 14:15:00	74.933	81.065	12.1132	4.53955	1033.82	62.2188	8.48
2019-01-05 14:30:00	75.933	85.92	12.8386	5.24123	968.695	56.5802	7.342
2019-01-05 14:45:00	63.133	73.0495	10.9154	5.69482	1057.05	59.502	5.853
2019-01-05 15:00:00	53.2	59.324	8.8645	5.03525	1042.98	60.5206	5.72
2019-01-05 15:15:00	52.6	51.508	7.69659	5.25938	979.737	66.0387	4.785
2019-01-05 15:30:00	46.733	47.3417	7.07404	5.46428	1013.32	60.8743	4.718
2019-01-05 15:45:00	44.2	37.5796	5.61534	5.66968	977.029	65.0602	4.175
2019-01-05 16:00:00	36.4	34.1301	5.0999	5.09295	987.923	59.3249	3.248
2019-01-05 16:15:00	29.533	22.4076	3.34826	4.90394	1058.3	67.326	2.232
2019-01-05 16:30:00	26.8	17.4486	2.60726	4.94953	1054.55	68.9046	2.505
2019-01-05 16:45:00	29.667	10.7615	1.60804	4.67866	1060.52	65.4122	3.192
2019-01-05 17:00:00	25.467	0	0	4.63505	1035.58	62.7571	1.145
2019-01-05 17:15:00	15.867	0	0	5.45764	1060.06	68.3579	0.772
2019-01-05 17:30:00	8.867	0	0	5.61068	965.927	70.2689	-0.115
2019-01-05 17:45:00	0.267	0	0	5.17833	1017.64	67.3522	-0.285
2019-01-05 18:00:00	0	0	0	5.34851	975.924	63.7839	-0.244
2019-01-05 18:15:00	0	0	0	5.3806	1006.99	69.7096	-0.244
2019-01-05 18:30:00	0	0	0	4.67657	1053.02	65.4589	-0.244
2019-01-05 18:45:00	0	0	0	5.18939	1038.42	69.4528	-0.244
2019-01-05 19:00:00	0	0	0	4.14557	1059.66	75.3157	-0.244
2019-01-05 19:15:00	0	0	0	4.40916	1024.07	72.6991	-0.244
2019-01-05 19:30:00	0	0	0	4.22259	1028.88	65.9462	-0.244
2019-01-05 19:45:00	0	0	0	4.2831	1063.53	73.3984	-0.244
2019-01-05 20:00:00	0	0	0	3.84969	987.578	74.3777	-0.244
2019-01-05 20:15:00	0	0	0	4.24242	1065.44	68.7809	-0.244
2019-01-05 20:30:00	0	0	0	3.8106	1046.39	77.1006	-0.244
2019-01-05 20:45:00	0	0	0	3.29855	1016.78	72.3615	-0.244
2019-01-05 21:00:00	0	0	0	3.35578	1006.12	71.9051	-0.255
2019-01-05 21:15:00	0	0	0	3.15363	1009.47	66.9939	-0.244
2019-01-05 21:30:00	0	0	0	3.30194	1034.19	77.128	-0.244
2019-01-05 21:45:00	0	0	0	2.46153	997.287	66.8424	-0.244
2019-01-05 22:00:00	0	0	0	2.37591	966.85	74.4136	-0.244
2019-01-05 22:15:00	0	0	0	2.37217	1047.01	79.79	-0.244
2019-01-05 22:30:00	0	0	0	1.97754	1040.35	75.9365	-0.244
2019-01-05 22:45:00	0	0	0	1.74374	1045.01	70.8777	-0.244
2019-01-05 23:00:00	0	0	0	1.71341	1019.82	74.8705	-0.244
2019-01-05 23:15:00	0	0	0	1.53938	988.456	78.5953	-0.244
2019-01-05 23:30:00	0	0	0	1.72246	1047.28	77.3576	-0.244
2019-01-05 23:45:00	0	0	0	1.68003	1010.59	80.004	-0.244
2019-01-06 00:00:00	0	0	0	1.38166	988.959	64.6779	-0.244
2019-01-06 00:15:00	0	0	0	1.4582	1019.39	63.8551	-0.244
2019-01-06 00:30:00	0	0	0	1.59408	1027.66	74.3038	-0.244
2019-01-06 00:45:00	0	0	0	1.48351	970.194	63.7681	-0.244
2019-01-06 01:00:00	0	0	0	1.37617	1033.75	65.7805	-0.244
2019-01-06 01:15:00	0	0	0	1.46112	996.753	68.4755	-0.244
2019-01-06 01:30:00	0	0	0	1.4316	973.015	65.134	-0.244
2019-01-06 01:45:00	0	0	0	1.51816	1006.67	65.3988	-0.244
2019-01-06 02:00:00	0	0	0	1.38513	1039.26	74.3766	-0.244
2019-01-06 02:15:00	0	0	0	1.50023	959.266	76.9255	-0.244
2019-01-06 02:30:00	0	0	0	1.38035	975.926	65.1748	-0.255
2019-01-06 02:45:00	0	0	0	1.04844	1005.53	68.9683	-0.244
2019-01-06 03:00:00	0	0	0	0.996143	1022.46	67.5303	-0.244
2019-01-06 03:15:00	0	0	0	0.580989	973.274	67.2877	-0.244
2019-01-06 03:30:00	0	0	0	0.316798	1009.84	63.3833	-0.273
2019-01-06 03:45:00	0	0	0	0.057385	1012.37	70.3514	-0.285
2019-01-06 04:00:00	0	0	0	-0.222786	1054.01	65.5487	-0.255
2019-01-06 04:15:00	0	0	0	-0.511613	1003.39	73.9663	-0.273
2019-01-06 04:30:00	0	0	0	-0.609276	992.799	70.5984	-0.273
2019-01-06 04:45:00	0	0	0	-0.780275	985.688	74.7904	-0.273
2019-01-06 05:00:00	0	0	0	-0.813213	963.493	70.8818	-0.273
2019-01-06 05:15:00	0	0	0	-0.722063	1017.45	73.1125	-0.285
2019-01-06 05:30:00	0	0	0	-0.741146	957.569	67.4088	-0.273
2019-01-06 05:45:00	0	0	0	-0.69303	992.392	71.6441	-0.273
2019-01-06 06:00:00	0	0	0	-0.517905	975.578	76.6492	-0.303
2019-01-06 06:15:00	0	0	0	-0.404833	1046.46	64.5291	-0.273
2019-01-06 06:30:00	0	0	0	-0.219703	1009.83	68.4094	-0.273
2019-01-06 06:45:00	0	0	0	-0.00844915	1023.49	63.4613	-0.273
2019-01-06 07:00:00	0	0	0	0.219334	1003.2	68.1998	-0.273
2019-01-06 07:15:00	0	0	0	0.451444	956.947	74.9767	-0.273
2019-01-06 07:30:00	0.733	0	0	0.643426	960.365	66.0514	0.214
2019-01-06 07:45:00	16.2	11.8694	1.77359	0.921892	973.016	63.7438	3.203
2019-01-06 08:00:00	37.667	27.077	4.04598	1.19701	984.633	69.4751	6.156
2019-01-06 08:15:00	63.133	53.667	8.01921	1.36026	1005.09	66.4124	10.305
2019-01-06 08:30:00	97.067	78.2622	11.6944	1.85133	965.966	66.0194	10.719
2019-01-06 08:45:00	106.067	94.6896	14.149	2.05338	987.658	68.4299	12.248
2019-01-06 09:00:00	134.2	110.996	16.5857	2.92488	956.529	60.4985	19.291
2019-01-06 09:15:00	172.333	137.199	20.501	3.3875	988.883	70.0659	24.586
2019-01-06 09:30:00	209.533	154.637	23.1066	3.72783	969.042	56.7084	30.401
2019-01-06 09:45:00	297.333	200.26	29.9239	3.67039	975.842	58.1503	43.865
2019-01-06 10:00:00	386.067	228.014	34.0711	5.10413	1005.49	51.963	38.334
2019-01-06 10:15:00	365.667	258.156	38.5751	4.58139	1022	58.5857	47.035
2019-01-06 10:30:00	442.733	240.92	35.9995	6.18015	983.645	58.5256	55.112
2019-01-06 10:45:00	447.667	320.456	47.8842	6.45158	969.106	52.167	56.08
2019-01-06 11:00:00	449.467	307.125	45.8922	6.45574	1011.89	47.8606	59.069
2019-01-06 11:15:00	464.2	363.707	54.347	5.92967	956.444	51.465	55.888
2019-01-06 11:30:00	474.733	345.409	51.6128	7.46306	1010.17	54.4915	58.016
2019-01-06 11:45:00	468.2	341.133	50.9739	6.81776	1055.47	52.8502	52.474
2019-01-06 12:00:00	386.067	428.17	63.9794	7.00846	963.12	44.0514	48.155
2019-01-06 12:15:00	447.867	372.483	55.6584	8.01238	970.766	50.2825	47.723
2019-01-06 12:30:00	377.8	403.074	60.2294	6.78452	1044.58	52.7468	40.484
2019-01-06 12:45:00	441.533	472.099	70.5436	7.69214	958.796	49.0427	55.655
2019-01-06 13:00:00	429.067	438.044	65.4548	8.68225	965.467	48.879	62.676
2019-01-06 13:15:00	538.4	409.586	61.2025	8.00573	988.133	44.4553	46.422
2019-01-06 13:30:00	459.867	400.43	59.8343	8.284	1015.42	50.2227	40.691
2019-01-06 13:45:00	377.533	415.809	62.1323	8.10804	999.913	51.7707	36.32
2019-01-06 14:00:00	311.8	393.713	58.8307	7.76339	961.366	46.3787	51.654
2019-01-06 14:15:00	354.4	378.059	56.4915	9.21995	1015.6	52.6092	41.371
2019-01-06 14:30:00	331.067	301.177	45.0035	8.77914	987.692	49.4051	31.41
2019-01-06 14:45:00	259	319.313	47.7135	9.09249	1034.2	51.1494	35.145
2019-01-06 15:00:00	248.733	231.057	34.5258	8.77995	967.818	43.5777	28.424
2019-01-06 15:15:00	253	231.195	34.5463	7.59027	1028.3	49.6659	29.067
2019-01-06 15:30:00	230.2	197.303	29.4821	7.49057	1010.05	45.0109	28.465
2019-01-06 15:45:00	183.4	155.77	23.2759	7.72052	1032.63	44.1624	23.015
2019-01-06 16:00:00	155.067	132.411	19.7856	7.84523	1016.48	45.5068	17.384
2019-01-06 16:15:00	136.933	90.6724	13.5487	8.11536	1023.49	45.2721	14.384
2019-01-06 16:30:00	114.733	67.5304	10.0907	7.80225	1003	54.4935	9.81
2019-01-06 16:45:00	65	43.7188	6.5327	7.32557	1009.19	47.9721	6.252
2019-01-06 17:00:00	47.667	23.0001	3.4368	7.12309	971.14	52.3304	3.344
2019-01-06 17:15:00	25.867	0	0	7.11938	973.505	50.0663	1.408
2019-01-06 17:30:00	8.467	0	0	7.65428	980.564	54.3953	-0.148
2019-01-06 17:45:00	0.067	0	0	7.54341	1006.45	49.659	-0.285
2019-01-06 18:00:00	0	0	0	7.55518	998.522	53.5369	-0.273
2019-01-06 18:15:00	0	0	0	6.56009	1018.84	56.1774	-0.273
2019-01-06 18:30:00	0	0	0	6.95591	964.327	52.3969	-0.244
2019-01-06 18:45:00	0	0	0	5.52332	993.297	51.1402	-0.244
2019-01-06 19:00:00	0	0	0	5.8573	1047	59.8592	-0.244
2019-01-06 19:15:00	0	0	0	5.75224	1050	60.4526	-0.244
2019-01-06 19:30:00	0	0	0	5.28295	1031.8	61.2595	-0.244
2019-01-06 19:45:00	0	0	0	5.00658	1000.51	53.2876	-0.244
2019-01-06 20:00:00	0	0	0	4.78102	1031.44	63.0101	-0.244
2019-01-06 20:15:00	0	0	0	5.06108	1019.1	56.0261	-0.273
2019-01-06 20:30:00	0	0	0	5.19088	972.267	64.6426	-0.273
2019-01-06 20:45:00	0	0	0	5.19809	1028.25	53.8094	-0.273
2019-01-06 21:00:00	0	0	0	5.77323	1029.95	52.6578	-0.273
2019-01-06 21:15:00	0	0	0	5.71349	981.839	62.9688	-0.273
2019-01-06 21:30:00	0	0	0	4.91692	973.609	61.1502	-0.303
2019-01-06 21:45:00	0	0	0	5.49425	1006.04	52.89	-0.314
2019-01-06 22:00:00	0	0	0	5.05926	1024.76	60.5198	-0.314
2019-01-06 22:15:00	0	0	0	4.94713	977.022	53.4282	-0.314
2019-01-06 22:30:00	0	0	0	5.92373	988.42	64.2149	-0.314
2019-01-06 22:45:00	0	0	0	5.18524	977.703	54.3099	-0.273
2019-01-06 23:00:00	0	0	0	5.10397	1044.89	52.7383	-0.273
2019-01-06 23:15:00	0	0	0	5.63375	1036.69	53.6489	-0.273
2019-01-06 23:30:00	0	0	0	5.08285	977.479	56.4058	-0.273
2019-01-06 23:45:00	0	0	0	5.52009	1035.42	57.0688	-0.273
2019-01-07 00:00:00	0	0	0	5.93552	1031.16	65.9232	-0.273
2019-01-07 00:15:00	0	0	0	3.06732	1092.86	75.0041	-0.273
2019-01-07 00:30:00	0	0	0	3.1144	1071.67	80.912	-0.273
2019-01-07 00:45:00	0	0	0	3.04927	1011.95	67.7287	-0.273
2019-01-07 01:00:00	0	0	0	2.87937	1049.54	66.7632	-0.273
2019-01-07 01:15:00	0	0	0	3.22814	1012.59	65.9996	-0.273
2019-01-07 01:30:00	0	0	0	3.66003	1088.22	65.4167	-0.273
2019-01-07 01:45:00	0	0	0	3.2907	1051.38	65.7095	-0.244
2019-01-07 02:00:00	0	0	0	3.38891	1031.94	76.8217	-0.273
2019-01-07 02:15:00	0	0	0	3.75429	1039.24	73.7495	-0.273
2019-01-07 02:30:00	0	0	0	3.62852	1007.05	67.3299	-0.273
2019-01-07 02:45:00	0	0	0	3.47057	1049.16	70.4642	-0.273
2019-01-07 03:00:00	0	0	0	3.56635	1008.69	78.1006	-0.273
2019-01-07 03:15:00	0	0	0	3.49382	1051.36	76.8237	-0.273
2019-01-07 03:30:00	0	0	0	3.35595	1016.85	80.882	-0.273
2019-01-07 03:45:00	0	0	0	3.80338	1041.79	76.9433	-0.273
2019-01-07 04:00:00	0	0	0	3.44909	1084.84	73.6311	-0.273
2019-01-07 04:15:00	0	0	0	2.99105	1057.36	71.2527	-0.273
2019-01-07 04:30:00	0	0	0	3.03225	991.964	79.6546	-0.273
2019-01-07 04:45:00	0	0	0	2.99862	1046.15	71.8928	-0.273
2019-01-07 05:00:00	0	0	0	3.76529	1014.58	68.6059	-0.273
2019-01-07 05:15:00	0	0	0	3.07463	1076.38	80.0506	-0.273
2019-01-07 05:30:00	0	0	0	3.62027	1011.36	68.9745	-0.273
2019-01-07 05:45:00	0	0	0	3.73863	1055.42	76.5251	-0.273
2019-01-07 06:00:00	0	0	0	3.44699	1084.28	73.3517	-0.273
2019-01-07 06:15:00	0	0	0	3.16819	1046.32	71.1267	-0.244
2019-01-07 06:30:00	0	0	0	3.7673	1089.15	81.3216	-0.273
2019-01-07 06:45:00	0	0	0	3.32947	1013.99	82.8912	-0.244
2019-01-07 07:00:00	0	0	0	3.42641	1092.36	73.7983	-0.244
2019-01-07 07:15:00	0	0	0	3.52663	1067.8	71.2901	-0.273
2019-01-07 07:30:00	0	0	0	3.59727	1029.91	79.5253	-0.273
2019-01-07 07:45:00	0.667	0	0	3.83895	1049.31	78.4497	-0.055
2019-01-07 08:00:00	5.4	13.9941	2.09107	3.16306	1017.32	68.4489	0.251
2019-01-07 08:15:00	11.733	21.5842	3.22523	3.62165	990.786	75.06	0.839
2019-01-07 08:30:00	17.067	36.0283	5.38354	3.28606	1012.58	68.3692	1.496
2019-01-07 08:45:00	23.733	49.52	7.39954	3.89766	1031.68	80.6061	2.283
2019-01-07 09:00:00	31.867	67.2628	10.0508	4.04265	1038.04	69.604	3.418
2019-01-07 09:15:00	37.4	81.1095	12.1198	3.83098	1073.99	68.2456	4.216
2019-01-07 09:30:00	50	90.8257	13.5717	3.77729	1012.71	66.2424	6.167
2019-01-07 09:45:00	63.333	99.1762	14.8194	3.9577	1044.75	71.8702	6.968
2019-01-07 10:00:00	63.467	98.8011	14.7634	5.04973	1056.89	74.4499	6.572
2019-01-07 10:15:00	70.4	101.887	15.2244	4.66335	1021.76	73.7743	7.907
2019-01-07 10:30:00	71.267	118.268	17.6723	5.57572	1079.95	71.6618	7.586
2019-01-07 10:45:00	63.267	127.101	18.9921	4.60459	1093.72	69.6942	7.002
2019-01-07 11:00:00	66.933	151.36	22.6169	5.02074	1076.58	74.8201	8.31
2019-01-07 11:15:00	79.867	148.905	22.2501	5.98464	1086.51	64.4162	8.476
2019-01-07 11:30:00	83.467	168.14	25.1243	5.73896	1055.15	61.2782	9.791
2019-01-07 11:45:00	88.733	167.249	24.9912	5.83035	1089.23	71.9359	10.238
2019-01-07 12:00:00	97.8	208.447	31.1472	5.51673	1015.49	63.8217	11.354
2019-01-07 12:15:00	106.733	194.712	29.0949	5.39767	1005.34	64.2702	12.492
2019-01-07 12:30:00	117.067	205.581	30.719	6.4744	1085.92	63.7531	11.971
2019-01-07 12:45:00	110.4	199.647	29.8323	7.09349	1043.6	65.691	13.882
2019-01-07 13:00:00	150.067	230.591	34.4561	6.14636	1084.53	57.8021	16.586
2019-01-07 13:15:00	144.6	219.669	32.8242	6.46008	1039.93	60.5441	15.459
2019-01-07 13:30:00	139.333	195.726	29.2464	7.21269	1054.81	64.5703	14.805
2019-01-07 13:45:00	120.867	196.279	29.3291	5.97908	1030.89	57.9634	12.825
2019-01-07 14:00:00	123.067	173.91	25.9865	6.14846	1001.77	58.0801	12.278
2019-01-07 14:15:00	100.8	195.421	29.2008	6.85529	1004.65	60.4477	10.589
2019-01-07 14:30:00	100.267	175.354	26.2024	6.94318	1064.13	66.9757	9.947
2019-01-07 14:45:00	96.933	139.043	20.7766	6.64973	1080.53	58.508	10.327
2019-01-07 15:00:00	96.867	123.477	18.4505	7.02693	1006.14	64.5764	9.584
2019-01-07 15:15:00	86.867	114.076	17.0459	7.16746	1078.86	67.1375	8.99
2019-01-07 15:30:00	87.4	95.4622	14.2645	7.42037	993.4	58.1075	8.764
2019-01-07 15:45:00	77.733	79.2408	11.8406	7.14589	1043.83	55.6549	7.186
2019-01-07 16:00:00	64.067	75.8732	11.3374	6.41709	1067.38	62.6161	5.904
2019-01-07 16:15:00	54.733	51.4856	7.69325	6.86519	1072.76	57.6799	4.766
2019-01-07 16:30:00	43.867	36.1284	5.39849	6.57561	1009.51	62.1133	3.384
2019-01-07 16:45:00	30.4	22.7003	3.39201	7.17974	1084.69	63.1507	1.851
2019-01-07 17:00:00	18.067	14.9364	2.23187	6.78221	1033.16	65.7466	0.743
2019-01-07 17:15:00	9.467	0	0	7.56635	1087.73	66.2547	-0.011
2019-01-07 17:30:00	1.8	0	0	6.98974	1060.97	62.6382	-0.273
2019-01-07 17:45:00	0	0	0	6.27397	1020.99	67.8249	-0.273
2019-01-07 18:00:00	0	0	0	7.15035	1090.8	62.1497	-0.244
2019-01-07 18:15:00	0	0	0	6.83132	1002.58	61.4834	-0.214
2019-01-07 18:30:00	0	0	0	5.65444	998.897	63.463	-0.244
2019-01-07 18:45:00	0	0	0	5.99756	1005.62	71.5911	-0.244
2019-01-07 19:00:00	0	0	0	5.78496	998.2	75.5355	-0.244
2019-01-07 19:15:00	0	0	0	5.51789	1033.88	74.235	-0.244
2019-01-07 19:30:00	0	0	0	5.84577	998.302	73.361	-0.244
2019-01-07 19:45:00	0	0	0	4.94174	1088.26	75.4228	-0.244
2019-01-07 20:00:00	0	0	0	4.8122	1022.05	78.8442	-0.244
2019-01-07 20:15:00	0	0	0	4.78291	1043.14	68.9338	-0.244
2019-01-07 20:30:00	0	0	0	5.06055	1039.85	63.401	-0.244
2019-01-07 20:45:00	0	0	0	4.56859	1048.55	74.9476	-0.273
2019-01-07 21:00:00	0	0	0	4.89294	1090.67	68.2932	-0.244
2019-01-07 21:15:00	0	0	0	4.59105	996.244	76.7616	-0.273
2019-01-07 21:30:00	0	0	0	4.61543	1024.41	66.6865	-0.244
2019-01-07 21:45:00	0	0	0	5.05315	1014.46	75.3254	-0.244
2019-01-07 22:00:00	0	0	0	4.95242	997.892	73.6533	-0.244
2019-01-07 22:15:00	0	0	0	4.5993	1034.1	64.2939	-0.244
2019-01-07 22:30:00	0	0	0	4.05941	1066.46	64.4283	-0.244
2019-01-07 22:45:00	0	0	0	4.18369	1013.84	64.9418	-0.244
2019-01-07 23:00:00	0	0	0	4.3292	1009.87	76.2592	-0.244
2019-01-07 23:15:00	0	0	0	3.9921	1088.64	64.5051	-0.244
2019-01-07 23:30:00	0	0	0	4.275	1072.86	76.9651	-0.244
2019-01-07 23:45:00	0	0	0	3.89541	998.092	68.8535	-0.244
2019-01-08 00:00:00	0	0	0	3.64822	1036.1	76.732	-0.244
2019-01-08 00:15:00	0	0	0	1.63277	1028.35	90.9476	-0.244
2019-01-08 00:30:00	0	0	0	1.48377	991.734	77.5648	-0.244
2019-01-08 00:45:00	0	0	0	1.45361	1072.44	76.466	-0.244
2019-01-08 01:00:00	0	0	0	1.19629	1074.99	84.2817	-0.244
2019-01-08 01:15:00	0	0	0	1.21149	1011.96	76.649	-0.244
2019-01-08 01:30:00	0	0	0	1.12981	1016	92.4116	-0.244
2019-01-08 01:45:00	0	0	0	1.1021	1000.98	80.3229	-0.244
2019-01-08 02:00:00	0	0	0	0.919229	992.594	89.8018	-0.244
2019-01-08 02:15:00	0	0	0	0.816606	1056.42	93.1025	-0.244
2019-01-08 02:30:00	0	0	0	0.761113	1042.39	80.0209	-0.244
2019-01-08 02:45:00	0	0	0	0.815751	1046.95	76.4496	-0.244
2019-01-08 03:00:00	0	0	0	0.738329	1064.41	79.2474	-0.244
2019-01-08 03:15:00	0	0	0	0.669545	1056.44	81.6576	-0.244
2019-01-08 03:30:00	0	0	0	0.644304	1034.87	77.5083	-0.244
2019-01-08 03:45:00	0	0	0	0.746351	999.977	78.674	-0.244
2019-01-08 04:00:00	0	0	0	0.672515	1013.76	89.8931	-0.244
2019-01-08 04:15:00	0	0	0	0.641333	1029.26	84.7432	-0.244
2019-01-08 04:30:00	0	0	0	0.588601	989.555	89.0863	-0.244
2019-01-08 04:45:00	0	0	0	0.551314	1074.1	88.1669	-0.244
2019-01-08 05:00:00	0	0	0	0.632606	1029.08	81.748	-0.244
2019-01-08 05:15:00	0	0	0	0.646196	1074.77	78.4917	-0.244
2019-01-08 05:30:00	0	0	0	0.614343	1032.55	83.6336	-0.244
2019-01-08 05:45:00	0	0	0	0.712738	1008.29	88.1075	-0.244
2019-01-08 06:00:00	0	0	0	0.701113	1070.06	75.7541	-0.244
2019-01-08 06:15:00	0	0	0	0.636443	1063.04	81.8728	-0.244
2019-01-08 06:30:00	0	0	0	0.814823	1049.32	78.1313	-0.244
2019-01-08 06:45:00	0	0	0	0.803234	1059.41	92.6612	-0.244
2019-01-08 07:00:00	0	0	0	0.800835	1005.08	82.7163	-0.244
2019-01-08 07:15:00	0	0	0	0.811954	997.819	89.3889	-0.273
2019-01-08 07:30:00	0.4	0	0	0.938586	1006.83	79.104	0.033
2019-01-08 07:45:00	10.8	13.1246	1.96114	0.847226	1026.92	88.0977	1.563
2019-01-08 08:00:00	26	29.6495	4.43038	0.914309	1083.97	83.8842	3.968
2019-01-08 08:15:00	46.133	57.0982	8.53192	1.05682	999.58	80.2194	6.887
2019-01-08 08:30:00	81.667	74.1997	11.0873	1.43799	1091.36	90.9299	12.681
2019-01-08 08:45:00	123.333	100.214	14.9746	1.65119	1070.92	73.8313	14.979
2019-01-08 09:00:00	104.467	117.285	17.5254	1.81961	995.217	80.5287	10.02
2019-01-08 09:15:00	99.533	153.687	22.9647	2.27588	1065.94	82.874	12.285
2019-01-08 09:30:00	130.533	193.774	28.9547	2.6053	1077.24	83.7615	15.814
2019-01-08 09:45:00	164.733	207.045	30.9377	2.83928	1049.16	69.8688	23.507
2019-01-08 10:00:00	163.733	190.109	28.4071	3.48244	1060.35	75.015	19.753
2019-01-08 10:15:00	264.8	220.969	33.0183	3.86362	1002.85	67.5158	44.279
2019-01-08 10:30:00	433.067	251.797	37.6248	3.75634	1013.5	70.0983	68.683
2019-01-08 10:45:00	456.4	227.053	33.9274	4.00721	1010.62	80.4646	58.39
2019-01-08 11:00:00	366.933	281.965	42.1327	4.94295	1047.47	75.0304	30.922
2019-01-08 11:15:00	237.533	282.467	42.2076	4.46944	993.324	67.491	26.614
2019-01-08 11:30:00	284.733	273.165	40.8177	5.42816	1017.03	70.8339	31.916
2019-01-08 11:45:00	299.467	256.376	38.3091	4.74301	1046.03	73.5549	42.406
2019-01-08 12:00:00	436.667	275.791	41.2102	5.42326	1003.6	69.3379	53.719
2019-01-08 12:15:00	343	317.729	47.4767	5.77405	1079.36	74.471	27.885
2019-01-08 12:30:00	247.533	284.45	42.504	5.8164	1046.7	65.7579	34.225
2019-01-08 12:45:00	302.133	313.851	46.8973	6.50161	1011.82	67.1932	30.25
2019-01-08 13:00:00	240.067	307.682	45.9755	6.79855	1053.02	69.3428	23.876
2019-01-08 13:15:00	220.667	326.134	48.7327	5.66239	1022.71	63.7268	26.754
2019-01-08 13:30:00	229.533	322.587	48.2026	6.56442	1065.79	62.8809	26.621
2019-01-08 13:45:00	223.133	324.052	48.4215	5.86305	1071.68	63.238	21.63
2019-01-08 14:00:00	188.933	270.923	40.4828	6.15744	1021.48	72.0386	20.288
2019-01-08 14:15:00	162.067	266.374	39.8031	5.82143	1077.54	61.3289	15.507
2019-01-08 14:30:00	137.067	230.482	34.4399	6.96358	1013.52	61.3083	14.79
2019-01-08 14:45:00	158.333	182.748	27.3072	5.70636	1055.37	72.5954	16.361
2019-01-08 15:00:00	120.2	130.639	19.5207	6.82902	1053.33	72.7813	13.216
2019-01-08 15:15:00	105.933	123.575	18.4652	5.58353	1071.96	61.7077	5.742
2019-01-08 15:30:00	46.667	108.077	16.1494	5.66598	1005.85	70.3953	5.306
2019-01-08 15:45:00	46.067	73.3344	10.958	5.83238	1083.52	70.3424	3.798
2019-01-08 16:00:00	31.867	71.4063	10.6699	6.74825	1010.57	62.9971	2.224
2019-01-08 16:15:00	16.6	52.5059	7.84572	6.11463	1076.54	75.2629	0.665
2019-01-08 16:30:00	9.067	34.9207	5.21804	5.64119	1083.62	76.7756	0.17
2019-01-08 16:45:00	4.333	23.5097	3.51294	5.32192	993.968	62.7953	-0.188
2019-01-08 17:00:00	1.467	13.0903	1.95602	6.22807	1031.42	69.5245	-0.262
2019-01-08 17:15:00	0	0	0	5.77854	1060.91	73.152	-0.273
2019-01-08 17:30:00	0	0	0	6.50763	1003.94	74.2172	-0.273
2019-01-08 17:45:00	0	0	0	5.13177	1004.74	67.4884	-0.273
2019-01-08 18:00:00	0	0	0	6.02937	1047.54	76.2997	-0.244
2019-01-08 18:15:00	0	0	0	5.61976	1029.12	75.2561	-0.244
2019-01-08 18:30:00	0	0	0	6.06947	1086.24	71.78	-0.244
2019-01-08 18:45:00	0	0	0	5.79721	1021	81.0155	-0.244
2019-01-08 19:00:00	0	0	0	5.58931	1039.14	74.2962	-0.244
2019-01-08 19:15:00	0	0	0	5.98873	1048.2	80.2225	-0.244
2019-01-08 19:30:00	0	0	0	5.4415	1004.54	77.693	-0.244
2019-01-08 19:45:00	0	0	0	5.96927	1060.06	86.5087	-0.244
2019-01-08 20:00:00	0	0	0	5.95945	998.406	86.5679	-0.244
2019-01-08 20:15:00	0	0	0	5.42576	1081.64	79.9948	-0.244
2019-01-08 20:30:00	0	0	0	4.69729	1074.5	78.7706	-0.244
2019-01-08 20:45:00	0	0	0	5.43548	1042.82	76.5806	-0.244
2019-01-08 21:00:00	0	0	0	5.64713	990.188	88.6286	-0.255
2019-01-08 21:15:00	0	0	0	4.54492	1062.9	86.0186	-0.285
2019-01-08 21:30:00	0	0	0	5.23722	1071.2	82.7143	-0.314
2019-01-08 21:45:00	0	0	0	4.87674	1018.2	83.6135	-0.244
2019-01-08 22:00:00	0	0	0	4.62739	1001.15	76.6949	-0.244
2019-01-08 22:15:00	0	0	0	4.6257	1089.56	75.1077	-0.273
2019-01-08 22:30:00	0	0	0	4.36136	1068.2	85.7772	-0.273
2019-01-08 22:45:00	0	0	0	4.83705	997.244	91.725	-0.273
2019-01-08 23:00:00	0	0	0	5.02711	1084.46	89.3884	-0.244
2019-01-08 23:15:00	0	0	0	4.24498	1054.33	83.3747	-0.244
2019-01-08 23:30:00	0	0	0	5.08024	1019.33	78.8832	-0.244
2019-01-08 23:45:00	0	0	0	4.43376	1067.14	84.2181	-0.244
2019-01-09 00:00:00	0	0	0	3.94197	1028.61	79.9047	-0.244
2019-01-09 00:15:00	0	0	0	3.22935	1043.58	82.2852	-0.244
2019-01-09 00:30:00	0	0	0	3.30098	1052.46	80.5732	-0.244
2019-01-09 00:45:00	0	0	0	3.58651	1067.86	83.7485	-0.244
2019-01-09 01:00:00	0	0	0	3.84409	1037.25	79.9817	-0.244
2019-01-09 01:15:00	0	0	0	3.68689	1024.59	80.4588	-0.244
2019-01-09 01:30:00	0	0	0	3.20001	996.959	78.2597	-0.244
2019-01-09 01:45:00	0	0	0	3.79042	993.378	75.0219	-0.244
2019-01-09 02:00:00	0	0	0	3.4606	979.415	88.2585	-0.244
2019-01-09 02:15:00	0	0	0	3.7075	1051.98	91.8652	-0.244
2019-01-09 02:30:00	0	0	0	3.00161	1056.39	73.9632	-0.244
2019-01-09 02:45:00	0	0	0	2.80365	995.288	78.8943	-0.244
2019-01-09 03:00:00	0	0	0	2.96178	1008.62	74.6758	-0.244
2019-01-09 03:15:00	0	0	0	2.98952	1020.91	85.3297	-0.244
2019-01-09 03:30:00	0	0	0	2.92282	1006.28	87.3403	-0.244
2019-01-09 03:45:00	0	0	0	2.54223	1017.18	86.0302	-0.244
2019-01-09 04:00:00	0	0	0	2.7234	1023.48	91.6885	-0.244
2019-01-09 04:15:00	0	0	0	2.43667	993.727	82.3752	-0.244
2019-01-09 04:30:00	0	0	0	2.59423	983.567	78.1406	-0.244
2019-01-09 04:45:00	0	0	0	2.41879	1023.6	86.7706	-0.273
2019-01-09 05:00:00	0	0	0	2.36598	1052.12	78.1134	-0.273
2019-01-09 05:15:00	0	0	0	2.41799	1079.74	82.691	-0.244
2019-01-09 05:30:00	0	0	0	2.04793	1066.99	86.5251	-0.273
2019-01-09 05:45:00	0	0	0	1.85699	1008.69	81.4746	-0.273
2019-01-09 06:00:00	0	0	0	1.93402	1019.43	88.1308	-0.244
2019-01-09 06:15:00	0	0	0	1.7417	1063.9	87.0642	-0.244
2019-01-09 06:30:00	0	0	0	2.07288	1017.84	85.0227	-0.244
2019-01-09 06:45:00	0	0	0	1.71098	1039.69	80.5599	-0.244
2019-01-09 07:00:00	0	0	0	1.94659	1068.2	85.713	-0.244
2019-01-09 07:15:00	0	0	0	1.81191	1009.24	88.4497	-0.233
2019-01-09 07:30:00	0	0	0	1.88318	1060.14	86.7778	-0.233
2019-01-09 07:45:00	0.067	0	0	1.61823	1051.57	78.5154	-0.211
2019-01-09 08:00:00	6.467	0	0	1.7702	1046.89	88.4996	0.377
2019-01-09 08:15:00	16.133	9.38735	1.40271	1.87285	1031.47	78.2752	1.293
2019-01-09 08:30:00	28.933	14.5656	2.17646	1.67324	1069.33	94.5153	1.714
2019-01-09 08:45:00	39.133	20.9132	3.12497	1.9214	1025.93	77.8858	4.098
2019-01-09 09:00:00	60.2	21.6666	3.23753	2.10106	1023.22	80.5496	3.987
2019-01-09 09:15:00	53.133	31.4841	4.70453	2.19702	1034.57	90.9423	4.63
2019-01-09 09:30:00	76.533	35.6024	5.3199	2.08993	1080.35	91.9895	7.294
2019-01-09 09:45:00	97.533	38.6686	5.77806	1.99764	1014.83	85.1499	13.187
2019-01-09 10:00:00	176.467	46.4301	6.93783	2.32756	1001.56	90.138	14.524
2019-01-09 10:15:00	113.067	52.2778	7.81163	2.44372	1009.46	78.7212	6.677
2019-01-09 10:30:00	77.467	62.9127	9.40076	2.23743	981.173	78.8508	5.952
2019-01-09 10:45:00	83.667	61.1809	9.14198	2.84461	1047	88.9461	8.35
2019-01-09 11:00:00	100.067	60.5299	9.04469	2.80981	1035.7	88.6618	7.135
2019-01-09 11:15:00	67.4	78.2745	11.6962	2.76642	999.026	85.7801	7.353
2019-01-09 11:30:00	84.267	78.3706	11.7105	2.83472	1079.44	76.7672	7.829
2019-01-09 11:45:00	73.4	83.7264	12.5108	3.27648	980.27	80.2538	7.826
2019-01-09 12:00:00	77.533	82.2068	12.2838	3.38453	1059.43	75.1009	5.786
2019-01-09 12:15:00	68.4	105.177	15.7161	2.7469	1011.01	79.8578	6.987
2019-01-09 12:30:00	64.933	104.1	15.5551	2.85069	1059.02	82.4915	6.861
2019-01-09 12:45:00	62.2	104.97	15.6852	3.60821	1054.79	82.0279	5.967
2019-01-09 13:00:00	62.533	106.961	15.9827	3.53348	990.798	82.116	6.529
2019-01-09 13:15:00	57	99.3254	14.8417	3.34781	976.607	82.3609	6.484
2019-01-09 13:30:00	64.933	107.892	16.1218	3.28981	1010.43	81.86	7.157
2019-01-09 13:45:00	81.4	115.295	17.228	3.10033	1076.61	75.4186	11.14
2019-01-09 14:00:00	97.933	90.039	13.4541	3.35526	1061.27	80.6194	12.042
2019-01-09 14:15:00	112.267	85.9655	12.8454	3.1167	1057.35	81.5803	9.078
2019-01-09 14:30:00	80.6	91.2345	13.6327	3.68445	985.696	86.6372	11.945
2019-01-09 14:45:00	88.667	85.2962	12.7454	3.06795	981.231	88.9101	9.355
2019-01-09 15:00:00	87.467	64.7706	9.67837	3.66588	1022.07	77.1955	5.923
2019-01-09 15:15:00	32.733	71.4874	10.682	3.30934	1024.96	78.3792	2.586
2019-01-09 15:30:00	24.867	66.8077	9.98275	3.31771	987.773	73.761	3.133
2019-01-09 15:45:00	18.533	54.2152	8.10113	3.44528	1013.16	74.9131	0.754
2019-01-09 16:00:00	13.267	48.8684	7.30217	3.61336	1026.89	74.2843	0.842
2019-01-09 16:15:00	13.533	39.3434	5.8789	3.49083	1021.04	75.4524	1.038
2019-01-09 16:30:00	12.2	25.649	3.83262	3.52766	1075.69	78.1411	0.092
2019-01-09 16:45:00	9.733	18.7429	2.80066	3.43283	987.811	73.2974	0.369
2019-01-09 17:00:00	6.667	8.9416	1.3361	3.5795	999.871	81.375	0
2019-01-09 17:15:00	4.333	0	0	3.01979	1053.81	74.0889	-0.148
2019-01-09 17:30:00	1.867	0	0	2.91224	1022.29	80.9045	-0.325
2019-01-09 17:45:00	0	0	0	2.96974	1042.37	87.753	-0.314
2019-01-09 18:00:00	0	0	0	3.45466	1019.43	85.2427	-0.314
2019-01-09 18:15:00	0	0	0	2.72949	1035.4	92.1811	-0.273
2019-01-09 18:30:00	0	0	0	2.95807	1011.63	90.4877	-0.273
2019-01-09 18:45:00	0	0	0	3.32331	1065.5	90.2285	-0.244
2019-01-09 19:00:00	0	0	0	2.61764	1039.32	80.7768	-0.273
2019-01-09 19:15:00	0	0	0	3.00048	1000.24	75.8625	-0.244
2019-01-09 19:30:00	0	0	0	2.94497	1000.95	90.5442	-0.273
2019-01-09 19:45:00	0	0	0	3.07774	1017.9	79.3097	-0.303
2019-01-09 20:00:00	0	0	0	2.69943	1035.54	92.5838	-0.273
2019-01-09 20:15:00	0	0	0	2.83847	985.998	84.3302	-0.303
2019-01-09 20:30:00	0	0	0	3.0048	1022.87	89.6088	-0.273
2019-01-09 20:45:00	0	0	0	2.57412	1002.17	88.1457	-0.273
2019-01-09 21:00:00	0	0	0	2.94518	992.287	86.5467	-0.314
2019-01-09 21:15:00	0	0	0	2.98031	1060.77	86.6747	-0.303
2019-01-09 21:30:00	0	0	0	2.98796	1046.15	87.0875	-0.314
2019-01-09 21:45:00	0	0	0	2.69224	1024.01	84.4689	-0.314
2019-01-09 22:00:00	0	0	0	2.54334	1033.17	90.8332	-0.314
2019-01-09 22:15:00	0	0	0	2.3016	985.908	91.588	-0.303
2019-01-09 22:30:00	0	0	0	2.68598	1037.98	79.6371	-0.303
2019-01-09 22:45:00	0	0	0	2.75763	990.563	85.5314	-0.303
2019-01-09 23:00:00	0	0	0	2.56855	976.198	86.3903	-0.314
2019-01-09 23:15:00	0	0	0	2.31355	1061.16	77.5254	-0.303
2019-01-09 23:30:00	0	0	0	2.30827	989.797	84.7112	-0.244
2019-01-09 23:45:00	0	0	0	2.52322	992.865	90.5251	-0.244
2019-01-10 00:00:00	0	0	0	3.02837	1041.7	77.9596	-0.273
2019-01-10 00:15:00	0	0	0	2.49208	1070.59	70.0757	-0.273
2019-01-10 00:30:00	0	0	0	2.69304	1025.96	69.7983	-0.244
2019-01-10 00:45:00	0	0	0	2.68026	1091.23	71.6905	-0.273
2019-01-10 01:00:00	0	0	0	2.92764	1058.63	65.3026	-0.273
2019-01-10 01:15:00	0	0	0	2.43059	996.346	79.8091	-0.303
2019-01-10 01:30:00	0	0	0	2.62603	1080.9	66.0328	-0.273
2019-01-10 01:45:00	0	0	0	2.54258	1077.34	78.9905	-0.273
2019-01-10 02:00:00	0	0	0	2.42937	1020.1	76.3856	-0.273
2019-01-10 02:15:00	0	0	0	2.52386	1061.98	68.3915	-0.273
2019-01-10 02:30:00	0	0	0	2.9756	1095.17	65.1367	-0.303
2019-01-10 02:45:00	0	0	0	2.76869	1046.65	70.0556	-0.273
2019-01-10 03:00:00	0	0	0	2.61449	1090.86	68.0784	-0.273
2019-01-10 03:15:00	0	0	0	2.82803	1046.09	73.4362	-0.303
2019-01-10 03:30:00	0	0	0	2.61718	1006.93	79.075	-0.303
2019-01-10 03:45:00	0	0	0	2.49618	1089.73	70.605	-0.273
2019-01-10 04:00:00	0	0	0	2.50947	1052.58	77.6006	-0.303
2019-01-10 04:15:00	0	0	0	2.49626	1029.53	68.5317	-0.273
2019-01-10 04:30:00	0	0	0	2.69925	1056.01	75.5691	-0.303
2019-01-10 04:45:00	0	0	0	2.36747	1068.39	70.0481	-0.273
2019-01-10 05:00:00	0	0	0	2.80251	1085.07	67.0861	-0.273
2019-01-10 05:15:00	0	0	0	2.50704	1081.99	68.324	-0.273
2019-01-10 05:30:00	0	0	0	2.68204	1058.18	70.5675	-0.303
2019-01-10 05:45:00	0	0	0	2.86073	1015.34	71.5717	-0.273
2019-01-10 06:00:00	0	0	0	2.48282	1037.06	66.6008	-0.273
2019-01-10 06:15:00	0	0	0	2.75669	1035.68	70.5684	-0.273
2019-01-10 06:30:00	0	0	0	2.70826	993.699	71.7086	-0.244
2019-01-10 06:45:00	0	0	0	2.40119	1091.91	68.8943	-0.244
2019-01-10 07:00:00	0	0	0	2.81873	1016.7	78.5289	-0.244
2019-01-10 07:15:00	0	0	0	2.49722	1060.38	68.4774	-0.273
2019-01-10 07:30:00	0.133	0	0	2.89204	998.741	69.6728	-0.177
2019-01-10 07:45:00	7.2	0	0	2.72171	1029.32	69.3095	0.99
2019-01-10 08:00:00	11.733	14.9996	2.24133	2.85619	1017.28	70.9976	1.046
2019-01-10 08:15:00	20.733	23.3749	3.49279	2.6391	1043.1	76.0852	2.213
2019-01-10 08:30:00	33	35.4818	5.30187	2.68712	1000.66	62.6689	3.573
2019-01-10 08:45:00	42	44.3851	6.63226	2.80996	1021.2	66.095	4.105
2019-01-10 09:00:00	43.867	58.8929	8.80008	2.62842	1053.89	68.708	4.275
2019-01-10 09:15:00	53	59.7328	8.9256	2.72278	1056.64	67.987	3.617
2019-01-10 09:30:00	29.867	81.0925	12.1173	3.34957	1013.89	64.5069	2.531
2019-01-10 09:45:00	36.467	82.9252	12.3911	3.16072	1047.57	61.7868	4.16
2019-01-10 10:00:00	57	90.6431	13.5444	2.98695	1016.6	68.8881	7.113
2019-01-10 10:15:00	79.933	81.8014	12.2232	3.1568	1012.36	59.7664	11.89
2019-01-10 10:30:00	144.333	84.3366	12.602	3.44598	1083.18	61.1617	14.994
2019-01-10 10:45:00	190.533	89.2697	13.3391	3.68211	1010.22	66.4786	23.998
2019-01-10 11:00:00	194.8	99.0455	14.7999	3.43767	1025.1	67.6778	16.316
2019-01-10 11:15:00	190.733	96.5515	14.4272	4.25449	1031.87	62.1204	24.863
2019-01-10 11:30:00	218.133	101.967	15.2364	4.31518	1032.34	58.421	22.154
2019-01-10 11:45:00	213	110.402	16.4968	4.15099	1036.34	60.9055	38.833
2019-01-10 12:00:00	281.133	111.356	16.6394	4.43692	1013.65	63.4417	23.928
2019-01-10 12:15:00	209.533	111.497	16.6605	4.59847	1092.35	57.5232	17.872
2019-01-10 12:30:00	215.267	129.195	19.305	4.48657	1043.05	56.741	19.139
2019-01-10 12:45:00	175.333	137.748	20.583	4.88394	1040.75	65.0013	17.669
2019-01-10 13:00:00	140.733	133.494	19.9473	4.61395	1059.43	55.8927	14.196
2019-01-10 13:15:00	132.933	135.902	20.3073	4.86639	1013.71	56.3337	22.276
2019-01-10 13:30:00	171.6	117.145	17.5044	4.60053	1090.33	58.7246	22.313
2019-01-10 13:45:00	154.267	124.523	18.6068	5.17872	1021.1	67.9958	17.551
2019-01-10 14:00:00	145.067	121.12	18.0984	4.7143	1047.34	64.2412	16.93
2019-01-10 14:15:00	156.067	103.032	15.3956	4.39494	1045.93	56.9318	15.773
2019-01-10 14:30:00	129.333	111.033	16.5911	4.32226	1086.53	66.9236	14.609
2019-01-10 14:45:00	113.8	93.5376	13.9769	5.14876	1024.66	58.0775	8.517
2019-01-10 15:00:00	71.733	88.3864	13.2072	4.74715	990.945	66.6291	5.945
2019-01-10 15:15:00	51.8	78.3844	11.7126	4.43709	1051.18	63.9897	4.112
2019-01-10 15:30:00	44.667	63.9825	9.56061	4.91887	1019.63	60.2114	4.116
2019-01-10 15:45:00	41.4	65.2217	9.74577	5.18341	1024.47	54.4346	3.577
2019-01-10 16:00:00	34.867	48.7433	7.28349	5.21091	1053.96	57.8602	3.155
2019-01-10 16:15:00	27.333	36.1318	5.399	5.08297	1062.76	54.7448	1.689
2019-01-10 16:30:00	20.933	29.4508	4.4007	5.22348	1044.04	61.6793	1.238
2019-01-10 16:45:00	18.267	21.2771	3.17934	5.2698	990.379	60.798	1.485
2019-01-10 17:00:00	15.667	11.4769	1.71493	4.5231	1085.14	63.379	0.447
2019-01-10 17:15:00	8.8	0	0	4.85867	1051.88	59.3548	-0.011
2019-01-10 17:30:00	3.067	0	0	4.99007	1054.93	55.0178	-0.229
2019-01-10 17:45:00	0.067	0	0	5.08017	1023.26	55.5889	-0.214
2019-01-10 18:00:00	0	0	0	5.28309	1090.29	59.3617	-0.273
2019-01-10 18:15:00	0	0	0	4.51233	1074.66	69.2215	-0.273
2019-01-10 18:30:00	0	0	0	4.20342	1047.8	58.6507	-0.273
2019-01-10 18:45:00	0	0	0	4.83493	991.6	58.6834	-0.273
2019-01-10 19:00:00	0	0	0	4.41651	1037.52	65.647	-0.273
2019-01-10 19:15:00	0	0	0	4.56034	1031.61	70.5043	-0.303
2019-01-10 19:30:00	0	0	0	5.02435	1086.57	68.7931	-0.273
2019-01-10 19:45:00	0	0	0	4.83158	1064.05	66.9431	-0.303
2019-01-10 20:00:00	0	0	0	4.82945	1030.08	75.0552	-0.303
2019-01-10 20:15:00	0	0	0	4.01856	1028.32	70.392	-0.303
2019-01-10 20:30:00	0	0	0	4.20081	1089.38	68.917	-0.303
2019-01-10 20:45:00	0	0	0	4.65986	1086.08	62.723	-0.273
2019-01-10 21:00:00	0	0	0	4.72026	1087.63	67.5123	-0.285
2019-01-10 21:15:00	0	0	0	4.20458	1081.96	70.3933	-0.314
2019-01-10 21:30:00	0	0	0	3.93027	1092.2	65.2269	-0.314
2019-01-10 21:45:00	0	0	0	4.16199	1075.02	68.3092	-0.314
2019-01-10 22:00:00	0	0	0	3.83819	1080.85	76.2885	-0.314
2019-01-10 22:15:00	0	0	0	4.32689	1010.16	65.3264	-0.314
2019-01-10 22:30:00	0	0	0	4.45681	1073.07	65.9189	-0.314
2019-01-10 22:45:00	0	0	0	4.21076	1014.46	76.5006	-0.303
2019-01-10 23:00:00	0	0	0	3.91692	1054.63	69.8923	-0.285
2019-01-10 23:15:00	0	0	0	3.78249	1009.2	66.181	-0.285
2019-01-10 23:30:00	0	0	0	4.10331	1078.15	66.3555	-0.303
2019-01-10 23:45:00	0	0	0	3.68679	1021.18	67.8257	-0.314
2019-01-11 00:00:00	0	0	0	4.43077	1026.46	78.5669	-0.303
2019-01-11 00:15:00	0	0	0	4.93968	1033.99	81.6882	-0.303
2019-01-11 00:30:00	0	0	0	5.22038	1000.59	76.7185	-0.314
2019-01-11 00:45:00	0	0	0	4.26579	987.792	73.695	-0.303
2019-01-11 01:00:00	0	0	0	4.67879	983.971	76.3685	-0.273
2019-01-11 01:15:00	0	0	0	4.21856	1054.51	74.49	-0.314
2019-01-11 01:30:00	0	0	0	5.15326	1027.1	78.7128	-0.314
2019-01-11 01:45:00	0	0	0	4.18848	1024.25	76.7434	-0.314
2019-01-11 02:00:00	0	0	0	4.95192	1044.84	70.9085	-0.314
2019-01-11 02:15:00	0	0	0	4.889	1009.92	74.278	-0.314
2019-01-11 02:30:00	0	0	0	4.68586	1049.42	77.8546	-0.314
2019-01-11 02:45:00	0	0	0	4.79561	1044.31	68.6686	-0.314
2019-01-11 03:00:00	0	0	0	4.36139	998.998	75.8753	-0.314
2019-01-11 03:15:00	0	0	0	3.98817	1031.45	76.8133	-0.314
2019-01-11 03:30:00	0	0	0	3.89309	997.401	67.9244	-0.314
2019-01-11 03:45:00	0	0	0	4.82685	999.846	79.5693	-0.314
2019-01-11 04:00:00	0	0	0	4.497	999.732	80.6023	-0.314
2019-01-11 04:15:00	0	0	0	4.26345	979.985	77.7151	-0.314
2019-01-11 04:30:00	0	0	0	4.3896	1046.41	70.5477	-0.314
2019-01-11 04:45:00	0	0	0	3.87635	1046.42	68.9567	-0.314
2019-01-11 05:00:00	0	0	0	4.48835	976.818	78.3542	-0.314
2019-01-11 05:15:00	0	0	0	4.44194	1037.19	70.4974	-0.314
2019-01-11 05:30:00	0	0	0	4.54832	1032.49	68.8524	-0.314
2019-01-11 05:45:00	0	0	0	4.65624	1018.19	71.6758	-0.314
2019-01-11 06:00:00	0	0	0	4.73899	1021.67	81.1474	-0.314
2019-01-11 06:15:00	0	0	0	4.70982	1006.11	68.8845	-0.314
2019-01-11 06:30:00	0	0	0	3.71523	997.743	73.3961	-0.314
2019-01-11 06:45:00	0	0	0	4.29649	1019.87	81.4437	-0.303
2019-01-11 07:00:00	0	0	0	3.70201	1011.16	81.4671	-0.273
2019-01-11 07:15:00	0	0	0	4.29057	1012.43	80.7821	-0.273
2019-01-11 07:30:00	0	0	0	4.37684	1057.47	80.1511	-0.273
2019-01-11 07:45:00	0.533	0	0	4.2145	1001.93	70.1351	-0.103
2019-01-11 08:00:00	4.4	0	0	4.70307	1039.64	72.7749	0.041
2019-01-11 08:15:00	14.133	12.5427	1.8742	4.53441	1001.04	69.1646	2.542
2019-01-11 08:30:00	48.133	16.2499	2.42815	3.79784	1044.7	78.5566	5.398
2019-01-11 08:45:00	42.133	24.7527	3.69868	3.98787	1073.56	73.6215	3.532
2019-01-11 09:00:00	27	32.169	4.80686	4.70057	1026.08	70.3583	2.561
2019-01-11 09:15:00	31.467	39.2223	5.8608	4.02188	1025.62	77.2984	2.428
2019-01-11 09:30:00	26.6	39.9384	5.9678	4.50366	1033.2	80.1765	3.281
2019-01-11 09:45:00	40.067	42.638	6.37119	4.42972	1032.62	79.3635	5.084
2019-01-11 10:00:00	41.933	58.217	8.6991	4.84292	977.966	66.9412	4.375
2019-01-11 10:15:00	40.4	66.5272	9.94084	5.30797	1044.85	72.145	3.828
2019-01-11 10:30:00	57	69.9102	10.4463	4.65184	1068.54	74.4233	9.747
2019-01-11 10:45:00	110.533	77.9314	11.6449	5.22925	1030.87	62.3608	11.594
2019-01-11 11:00:00	93.133	79.2606	11.8435	4.85256	1053.41	64.5412	9.418
2019-01-11 11:15:00	97.533	86.8758	12.9814	4.61586	995.834	75.8379	15.256
2019-01-11 11:30:00	134.8	91.7137	13.7043	5.59008	1028.17	64.6147	13.758
2019-01-11 11:45:00	134.067	90.7917	13.5666	5.39686	1009.87	62.3668	18.005
2019-01-11 12:00:00	157.2	104.362	15.5943	4.8705	1044.42	66.6217	18.094
2019-01-11 12:15:00	109.4	108.372	16.1935	5.23261	1033.14	63.179	9.451
2019-01-11 12:30:00	77.2	103.976	15.5366	5.79953	1063.82	74.5442	10.826
2019-01-11 12:45:00	100.933	126.872	18.9579	5.75863	1058.01	66.7076	12.407
2019-01-11 13:00:00	113.667	118.319	17.6798	5.98581	1041.98	68.937	11.901
2019-01-11 13:15:00	115.8	118.568	17.7171	6.019	996.738	64.1913	13.689
2019-01-11 13:30:00	127.333	108.167	16.1629	5.91207	1028.32	64.883	12.847
2019-01-11 13:45:00	104.867	111.368	16.6412	6.14278	1062.83	59.9565	11.303
2019-01-11 14:00:00	101.2	123.116	18.3966	5.56452	1000.39	64.3312	11.166
2019-01-11 14:15:00	103.667	120.544	18.0123	5.51291	974.087	64.1427	10.153
2019-01-11 14:30:00	84.6	104.483	15.6124	5.73869	1029.69	59.6776	8.875
2019-01-11 14:45:00	68.4	124.954	18.6712	6.4072	1073	65.4775	6.496
2019-01-11 15:00:00	61.733	119.412	17.8432	6.72722	1054.69	69.1796	8.321
2019-01-11 15:15:00	73.467	120.71	18.0371	6.20559	1019.16	67.9901	7.9
2019-01-11 15:30:00	60.867	129.356	19.3291	5.53141	1051.29	63.072	5.794
2019-01-11 15:45:00	52.6	115.562	17.2678	6.4332	1036.38	68.4906	4.356
2019-01-11 16:00:00	41.867	110.443	16.503	6.0094	1050.03	70.3153	4.43
2019-01-11 16:15:00	43.067	86.7934	12.9691	5.38626	1039.71	69.508	3.558
2019-01-11 16:30:00	37.667	61.4436	9.18122	6.65101	1008.84	71.0995	3.743
2019-01-11 16:45:00	31.733	49.2028	7.35215	5.71362	1074.96	68.6062	2.169
2019-01-11 17:00:00	18.8	26.3719	3.94063	6.05907	1033.05	71.3866	0.879
2019-01-11 17:15:00	8.867	11.2396	1.67948	6.76678	1076.05	59.9085	0
2019-01-11 17:30:00	2.067	0	0	5.5617	1076.07	65.8991	-0.273
2019-01-11 17:45:00	0	0	0	5.18451	1020.7	71.0062	-0.273
2019-01-11 18:00:00	0	0	0	5.93917	1049.37	75.2072	-0.273
2019-01-11 18:15:00	0	0	0	4.55538	1015.72	71.3028	-0.273
2019-01-11 18:30:00	0	0	0	4.97034	1056.61	70.0737	-0.273
2019-01-11 18:45:00	0	0	0	4.47861	1058.24	75.034	-0.244
2019-01-11 19:00:00	0	0	0	3.72959	993.286	76.6724	-0.273
2019-01-11 19:15:00	0	0	0	3.07483	984.505	71.2339	-0.273
2019-01-11 19:30:00	0	0	0	3.16563	1007.57	83.9962	-0.273
2019-01-11 19:45:00	0	0	0	3.22906	1018.37	81.1657	-0.273
2019-01-11 20:00:00	0	0	0	3.15499	998.131	81.2447	-0.273
2019-01-11 20:15:00	0	0	0	2.67864	1073.84	71.6575	-0.273
2019-01-11 20:30:00	0	0	0	2.42276	1055.37	80.8724	-0.273
2019-01-11 20:45:00	0	0	0	2.74861	990.933	71.6441	-0.273
2019-01-11 21:00:00	0	0	0	2.55752	1009.6	77.2517	-0.244
2019-01-11 21:15:00	0	0	0	2.4489	1074.65	83.8167	-0.273
2019-01-11 21:30:00	0	0	0	2.78195	980.959	76.1358	-0.244
2019-01-11 21:45:00	0	0	0	2.52218	977.267	77.1561	-0.244
2019-01-11 22:00:00	0	0	0	2.2891	977.059	82.4768	-0.244
2019-01-11 22:15:00	0	0	0	2.6466	999.506	74.412	-0.244
2019-01-11 22:30:00	0	0	0	2.26398	990.907	76.5946	-0.244
2019-01-11 22:45:00	0	0	0	2.34579	1017.25	69.0446	-0.244
2019-01-11 23:00:00	0	0	0	2.24997	986.291	73.16	-0.244
2019-01-11 23:15:00	0	0	0	2.29652	1009.96	83.9748	-0.244
2019-01-11 23:30:00	0	0	0	1.97494	988.529	79.9761	-0.244
2019-01-11 23:45:00	0	0	0	1.88878	1022.4	77.0501	-0.273
2019-01-12 00:00:00	0	0	0	1.4013	1062.88	100	-0.244
2019-01-12 00:15:00	0	0	0	0	992.914	100	-0.244
2019-01-12 00:30:00	0	0	0	-0.0938629	1006.85	100	-0.244
2019-01-12 00:45:00	0	0	0	-0.209269	984.738	100	-0.244
2019-01-12 01:00:00	0	0	0	-0.310774	1050.69	100	-0.244
2019-01-12 01:15:00	0	0	0	-0.39084	1001.8	100	-0.244
2019-01-12 01:30:00	0	0	0	-0.532914	1001.58	96.9323	-0.273
2019-01-12 01:45:00	0	0	0	-0.523937	1020.93	100	-0.273
2019-01-12 02:00:00	0	0	0	-0.64403	975.459	100	-0.273
2019-01-12 02:15:00	0	0	0	-0.788585	980.358	100	-0.244
2019-01-12 02:30:00	0	0	0	-0.846017	1038.92	99.2536	-0.273
2019-01-12 02:45:00	0	0	0	-0.998939	1040.76	100	-0.244
2019-01-12 03:00:00	0	0	0	-0.963551	1040.83	100	-0.244
2019-01-12 03:15:00	0	0	0	-1.01342	980.439	100	-0.244
2019-01-12 03:30:00	0	0	0	-1.22936	972.336	100	-0.244
2019-01-12 03:45:00	0	0	0	-1.20709	1048.05	100	-0.244
2019-01-12 04:00:00	0	0	0	-1.30414	968.485	100	-0.244
2019-01-12 04:15:00	0	0	0	-1.39947	996.766	100	-0.244
2019-01-12 04:30:00	0	0	0	-1.47376	991.774	100	-0.244
2019-01-12 04:45:00	0	0	0	-1.45774	967.375	97.0139	-0.244
2019-01-12 05:00:00	0	0	0	-1.53316	1009.55	94.7223	-0.244
2019-01-12 05:15:00	0	0	0	-1.55314	978.682	98.4717	-0.244
2019-01-12 05:30:00	0	0	0	-1.46583	1044.79	100	-0.244
2019-01-12 05:45:00	0	0	0	-1.51253	1048.1	100	-0.244
2019-01-12 06:00:00	0	0	0	-1.31109	1050.16	100	-0.244
2019-01-12 06:15:00	0	0	0	-1.30022	1017.1	100	-0.244
2019-01-12 06:30:00	0	0	0	-1.44824	1002.46	100	-0.273
2019-01-12 06:45:00	0	0	0	-1.14451	978.442	100	-0.244
2019-01-12 07:00:00	0	0	0	-1.17426	988.525	100	-0.273
2019-01-12 07:15:00	0	0	0	-1.17991	1038.04	95.5071	-0.273
2019-01-12 07:30:00	0.133	0	0	-1.1175	980.919	97.1444	-0.188
2019-01-12 07:45:00	7.4	10.9164	1.63119	-1.07006	1057.8	100	0.765
2019-01-12 08:00:00	14.867	27.7046	4.13977	-1.10386	1024.48	98.6679	1.012
2019-01-12 08:15:00	18.867	44.1152	6.59193	-0.8596	1030.79	96.8067	1.629
2019-01-12 08:30:00	29.533	67.7284	10.1203	-0.72686	994.259	100	3.107
2019-01-12 08:45:00	46.867	88.3105	13.1958	-0.298626	1001	97.7467	3.34
2019-01-12 09:00:00	46.667	111.858	16.7143	0.144117	1032.96	93.8001	4.36
2019-01-12 09:15:00	63	145.482	21.7388	0.642589	1038.73	93.1427	6.137
2019-01-12 09:30:00	50.733	157.2	23.4896	1.27356	1046.79	100	5.627
2019-01-12 09:45:00	51.667	197.515	29.5137	1.56079	990.1	95.1429	6.255
2019-01-12 10:00:00	71.067	238.849	35.6901	2.43967	1021.13	90.5738	8.033
2019-01-12 10:15:00	84.867	250.019	37.3591	2.55042	987.281	100	10.46
2019-01-12 10:30:00	98	262.797	39.2685	3.7308	1039.61	100	11.099
2019-01-12 10:45:00	126.4	321.311	48.0119	3.44585	1019.58	100	12.496
2019-01-12 11:00:00	145.133	354.793	53.0151	3.7335	1067.39	100	15.389
2019-01-12 11:15:00	129.067	329.229	49.1952	4.10579	1059.67	85.1859	16.117
2019-01-12 11:30:00	135.933	325.174	48.5892	5.21772	984.127	85.6364	17.624
2019-01-12 11:45:00	144.933	408.071	60.9762	5.05647	1037.44	100	17.292
2019-01-12 12:00:00	163.8	419.631	62.7035	6.16295	978.094	81.3686	19.32
2019-01-12 12:15:00	169.867	414.492	61.9356	5.96847	1041.42	90.9146	16.967
2019-01-12 12:30:00	180.067	426.369	63.7103	6.44504	968.04	77.8086	19.235
2019-01-12 12:45:00	162.2	469.948	70.2221	6.37478	1006.93	84.7467	19.368
2019-01-12 13:00:00	154.4	483.693	72.276	7.34178	1060.17	78.688	17.72
2019-01-12 13:15:00	144.2	421.314	62.955	6.84253	994.243	90.5174	24.9
2019-01-12 13:30:00	213.333	453.416	67.7517	7.505	1033.48	74.2702	28.24
2019-01-12 13:45:00	240.067	450.098	67.256	7.22752	993.39	76.987	23.063
2019-01-12 14:00:00	142.667	479.811	71.696	7.80238	1055.21	78.4481	15.674
2019-01-12 14:15:00	176.467	370.75	55.3995	8.26033	1008.54	84.3479	16.9
2019-01-12 14:30:00	155.8	422.517	63.1347	7.87758	1016.24	75.5529	15.914
2019-01-12 14:45:00	191.2	315.263	47.1083	6.95994	1054.18	85.5198	20.481
2019-01-12 15:00:00	148.733	299.228	44.7123	7.51011	1013.19	77.2656	11.92
2019-01-12 15:15:00	191	311.598	46.5606	6.64392	1056.91	80.7008	32.559
2019-01-12 15:30:00	268	269.632	40.2899	7.402	1018.24	76.8983	23.835
2019-01-12 15:45:00	231.867	206.139	30.8024	7.9069	1026.11	77.7368	37.1
2019-01-12 16:00:00	218.067	174.563	26.0841	6.85723	1030.26	80.7377	16.623
2019-01-12 16:15:00	105.267	140.571	21.0049	7.20972	995.803	80.0737	7.342
2019-01-12 16:30:00	46	103.374	15.4467	7.38812	1013.11	77.867	4.918
2019-01-12 16:45:00	45.733	79.8024	11.9245	6.05945	1007.11	91.553	2.088
2019-01-12 17:00:00	12.867	49.7806	7.43848	7.35463	1055.06	91.0334	0.218
2019-01-12 17:15:00	9.867	19.7132	2.94565	6.31044	1039.88	89.8329	0.554
2019-01-12 17:30:00	7	0	0	5.96996	979.884	91.9281	-0.24
2019-01-12 17:45:00	0.867	0	0	6.97048	979.949	95.3362	-0.347
2019-01-12 18:00:00	0	0	0	6.2132	1037.18	93.3598	-0.273
2019-01-12 18:15:00	0	0	0	6.28154	989.876	80.6897	-0.273
2019-01-12 18:30:00	0	0	0	6.55438	1036.86	91.7974	-0.273
2019-01-12 18:45:00	0	0	0	5.41964	1055.77	84.9379	-0.244
2019-01-12 19:00:00	0	0	0	6.52857	1010.95	87.7021	-0.273
2019-01-12 19:15:00	0	0	0	5.24399	976.94	88.7774	-0.273
2019-01-12 19:30:00	0	0	0	5.7425	984.472	95.7303	-0.273
2019-01-12 19:45:00	0	0	0	6.48482	990.297	79.8871	-0.273
2019-01-12 20:00:00	0	0	0	6.09683	1035.28	97.2567	-0.273
2019-01-12 20:15:00	0	0	0	6.35411	1018.36	88.8377	-0.244
2019-01-12 20:30:00	0	0	0	5.35824	1051.52	91.0409	-0.273
2019-01-12 20:45:00	0	0	0	5.57716	1066.17	92.6575	-0.303
2019-01-12 21:00:00	0	0	0	5.34897	1044.42	88.5197	-0.303
2019-01-12 21:15:00	0	0	0	5.88817	1032.07	85.8571	-0.273
2019-01-12 21:30:00	0	0	0	5.47222	979.807	85.7203	-0.314
2019-01-12 21:45:00	0	0	0	5.03322	989.898	100	-0.314
2019-01-12 22:00:00	0	0	0	4.90913	992.07	85.9855	-0.314
2019-01-12 22:15:00	0	0	0	5.20707	1021.74	96.4603	-0.314
2019-01-12 22:30:00	0	0	0	4.90925	996.202	91.076	-0.303
2019-01-12 22:45:00	0	0	0	4.94466	1056.83	91.8437	-0.273
2019-01-12 23:00:00	0	0	0	4.81838	1056.02	98.7384	-0.273
2019-01-12 23:15:00	0	0	0	5.85797	978.445	87.9309	-0.303
2019-01-12 23:30:00	0	0	0	4.95937	1022.21	100	-0.303
2019-01-12 23:45:00	0	0	0	5.0402	1052.53	100	-0.244
2019-01-13 00:00:00	0	0	0	6.14736	1073.99	74.7919	-0.244
2019-01-13 00:15:00	0	0	0	7.08468	1029.48	62.1247	-0.244
2019-01-13 00:30:00	0	0	0	7.0564	1033.22	65.7615	-0.244
2019-01-13 00:45:00	0	0	0	6.93869	1028.35	65.6141	-0.273
2019-01-13 01:00:00	0	0	0	6.20539	1031.78	67.0241	-0.273
2019-01-13 01:15:00	0	0	0	7.53576	1074.48	62.7738	-0.273
2019-01-13 01:30:00	0	0	0	7.20136	997.491	63.0187	-0.273
2019-01-13 01:45:00	0	0	0	6.68825	1073.83	64.7978	-0.273
2019-01-13 02:00:00	0	0	0	7.00629	1010.79	67.7527	-0.273
2019-01-13 02:15:00	0	0	0	7.31066	987.895	67.4733	-0.273
2019-01-13 02:30:00	0	0	0	7.44894	1041.08	70.4757	-0.273
2019-01-13 02:45:00	0	0	0	6.98531	986.292	69.0973	-0.273
2019-01-13 03:00:00	0	0	0	5.91297	980.866	60.8115	-0.273
2019-01-13 03:15:00	0	0	0	6.38725	1057.2	64.9084	-0.273
2019-01-13 03:30:00	0	0	0	5.4575	1033.6	63.8009	-0.303
2019-01-13 03:45:00	0	0	0	5.70264	1043.98	70.4048	-0.273
2019-01-13 04:00:00	0	0	0	6.06827	1041.53	75.1583	-0.273
2019-01-13 04:15:00	0	0	0	4.81453	1047.21	70.9076	-0.273
2019-01-13 04:30:00	0	0	0	5.86617	995.266	68.4737	-0.273
2019-01-13 04:45:00	0	0	0	5.70021	979.367	76.073	-0.273
2019-01-13 05:00:00	0	0	0	5.3839	996.268	71.2542	-0.244
2019-01-13 05:15:00	0	0	0	4.7674	1032.51	77.7188	-0.273
2019-01-13 05:30:00	0	0	0	5.12507	1069.76	68.68	-0.273
2019-01-13 05:45:00	0	0	0	5.17139	1066.23	66.2797	-0.244
2019-01-13 06:00:00	0	0	0	4.82489	1075.62	64.3035	-0.244
2019-01-13 06:15:00	0	0	0	5.56013	1005.03	69.1078	-0.273
2019-01-13 06:30:00	0	0	0	4.84019	1026.34	75.1677	-0.244
2019-01-13 06:45:00	0	0	0	4.72045	1028.75	71.5889	-0.244
2019-01-13 07:00:00	0	0	0	5.40679	996.235	67.2443	-0.244
2019-01-13 07:15:00	0	0	0	5.5642	1014.32	70.3962	-0.273
2019-01-13 07:30:00	0.667	0	0	4.56299	1035.81	76.4757	0.078
2019-01-13 07:45:00	13.067	12.4517	1.8606	5.22363	1056.03	78.1022	1.951
2019-01-13 08:00:00	28.6	24.0572	3.59475	5.09118	999.326	71.243	2.032
2019-01-13 08:15:00	35.533	50.7439	7.58242	5.50556	997.72	66.1647	3.211
2019-01-13 08:30:00	56.667	75.5903	11.2951	5.32175	1054.95	73.1061	5.701
2019-01-13 08:45:00	116.133	88.1131	13.1663	5.57796	1022.19	69.3754	13.604
2019-01-13 09:00:00	184.8	112.12	16.7535	5.75587	1078.94	64.6085	15.662
2019-01-13 09:15:00	198.4	157.252	23.4974	7.37509	1010.87	70.7597	19.867
2019-01-13 09:30:00	259.067	176.738	26.4091	7.15015	1035.83	64.2465	20.717
2019-01-13 09:45:00	252.733	191.572	28.6256	7.31702	1042.17	56.6477	23.2
2019-01-13 10:00:00	234.6	201.187	30.0624	8.68594	1006.72	59.4967	25.842
2019-01-13 10:15:00	285.2	200.475	29.9561	8.4535	1050.36	52.7187	30.856
2019-01-13 10:30:00	327.133	225.109	33.637	10.0072	1060.5	52.6539	33.176
2019-01-13 10:45:00	284.333	246.21	36.79	9.28673	1065.74	59.309	39.864
2019-01-13 11:00:00	282.2	252.074	37.6662	11.0468	1019.87	53.6971	47.494
2019-01-13 11:15:00	309.133	286.328	42.7847	10.9223	986.252	49.0241	50.246
2019-01-13 11:30:00	301.2	354.478	52.968	10.3396	1018.58	54.6813	52.168
2019-01-13 11:45:00	417.6	328.825	49.1347	10.2988	1036.12	46.4469	44.12
2019-01-13 12:00:00	299.933	341.198	50.9837	12.8485	1080.51	48.7408	37.1
2019-01-13 12:15:00	322.667	354.249	52.9337	10.5778	1040.85	46.8908	50.065
2019-01-13 12:30:00	426.733	366.989	54.8374	12.4162	1074.87	47.859	58.748
2019-01-13 12:45:00	552.933	351.337	52.4987	11.4455	1026.13	52.8495	73.664
2019-01-13 13:00:00	556.267	367.756	54.952	12.4514	1076.5	47.3074	48.753
2019-01-13 13:15:00	361.6	382.741	57.1912	13.7111	1024.48	51.3422	38.323
2019-01-13 13:30:00	308.8	379.52	56.7099	12.8418	985.499	46.0942	31
2019-01-13 13:45:00	246.6	335.742	50.1684	14.4274	988.304	40.9636	24.205
2019-01-13 14:00:00	201	353.577	52.8333	13.5809	1005.44	44.309	20.24
2019-01-13 14:15:00	170.8	368.76	55.1021	11.7223	982.789	43.7006	17.443
2019-01-13 14:30:00	155.133	351.764	52.5625	12.5731	1033.63	44.4244	17.369
2019-01-13 14:45:00	167.133	263.124	39.3173	13.8813	991.876	46.1089	20.447
2019-01-13 15:00:00	196.933	269.567	40.2802	13.3076	1042.56	47.0248	26.895
2019-01-13 15:15:00	306.533	243.126	36.3291	11.4209	986.917	46.1897	36.971
2019-01-13 15:30:00	431	208.841	31.2062	11.7286	1021.47	48.6813	43.219
2019-01-13 15:45:00	310.2	210.974	31.5249	12.2399	1040.17	50.62	47.808
2019-01-13 16:00:00	312.333	147.943	22.1064	10.5037	1019.78	47.904	31.905
2019-01-13 16:15:00	223.4	139.107	20.7861	10.3928	1017.19	45.7402	22.073
2019-01-13 16:30:00	113.267	97.2282	14.5284	10.6054	1007.25	49.7546	6.13
2019-01-13 16:45:00	48.2	59.9656	8.96037	12.2527	1058.95	54.2414	4.142
2019-01-13 17:00:00	37.2	35.6832	5.33197	10.3325	1068.36	55.0732	2.572
2019-01-13 17:15:00	22.067	14.5635	2.17616	10.2395	996.878	51.4827	0.879
2019-01-13 17:30:00	8.733	0	0	11.3135	995.869	54.4929	-0.022
2019-01-13 17:45:00	0.867	0	0	9.25375	1058.58	50.026	-0.273
2019-01-13 18:00:00	0	0	0	9.14872	1027.3	56.5538	-0.273
2019-01-13 18:15:00	0	0	0	9.97235	1015.07	52.145	-0.273
2019-01-13 18:30:00	0	0	0	9.529	1045.18	54.9203	-0.244
2019-01-13 18:45:00	0	0	0	7.92286	991.466	54.9215	-0.273
2019-01-13 19:00:00	0	0	0	7.21482	1050.31	65.1934	-0.244
2019-01-13 19:15:00	0	0	0	6.70996	1037.38	65.1618	-0.273
2019-01-13 19:30:00	0	0	0	7.5277	1008.02	70.6541	-0.273
2019-01-13 19:45:00	0	0	0	6.12326	1019.25	60.5409	-0.273
2019-01-13 20:00:00	0	0	0	6.02168	1014.76	73.0772	-0.244
2019-01-13 20:15:00	0	0	0	6.20232	978.243	68.9075	-0.273
2019-01-13 20:30:00	0	0	0	6.60691	1047.83	70.444	-0.273
2019-01-13 20:45:00	0	0	0	6.92671	993.645	73.9893	-0.273
2019-01-13 21:00:00	0	0	0	5.82917	996.461	64.7633	-0.273
2019-01-13 21:15:00	0	0	0	6.20332	979.723	71.2908	-0.244
2019-01-13 21:30:00	0	0	0	6.23308	1053.11	62.8345	-0.244
2019-01-13 21:45:00	0	0	0	6.13723	1040.95	60.6706	-0.244
2019-01-13 22:00:00	0	0	0	5.12061	1007.48	65.4492	-0.244
2019-01-13 22:15:00	0	0	0	5.2454	1067.18	69.4578	-0.244
2019-01-13 22:30:00	0	0	0	5.29245	1024.97	71.0773	-0.244
2019-01-13 22:45:00	0	0	0	6.07612	1031.47	71.8526	-0.244
2019-01-13 23:00:00	0	0	0	5.16424	1054.24	71.2257	-0.244
2019-01-13 23:15:00	0	0	0	5.88973	979.221	72.6721	-0.244
2019-01-13 23:30:00	0	0	0	5.6931	994.375	73.6245	-0.244
2019-01-13 23:45:00	0	0	0	5.8583	988.473	69.5934	-0.244
2019-01-14 00:00:00	0	0	0	6.72995	982.39	68.7727	-0.244
2019-01-14 00:15:00	0	0	0	6.41122	954.766	67.9545	-0.244
2019-01-14 00:30:00	0	0	0	6.34943	965.028	66.6715	-0.244
2019-01-14 00:45:00	0	0	0	5.12103	978.891	70.4593	-0.244
2019-01-14 01:00:00	0	0	0	5.80861	1013.32	63.8959	-0.244
2019-01-14 01:15:00	0	0	0	5.12237	988.602	71.2016	-0.244
2019-01-14 01:30:00	0	0	0	5.59812	1030.99	71.1197	-0.244
2019-01-14 01:45:00	0	0	0	5.31615	968.453	62.4955	-0.244
2019-01-14 02:00:00	0	0	0	5.93973	1016.32	60.1284	-0.244
2019-01-14 02:15:00	0	0	0	5.71409	978.159	70.0471	-0.244
2019-01-14 02:30:00	0	0	0	5.0017	999.174	69.8623	-0.244
2019-01-14 02:45:00	0	0	0	5.43022	1028.96	57.6939	-0.244
2019-01-14 03:00:00	0	0	0	6.24435	989.928	61.3219	-0.244
2019-01-14 03:15:00	0	0	0	5.1934	972.475	58.6036	-0.244
2019-01-14 03:30:00	0	0	0	5.91652	1020.99	66.509	-0.244
2019-01-14 03:45:00	0	0	0	5.02257	960.027	65.9936	-0.244
2019-01-14 04:00:00	0	0	0	5.32253	998.918	57.2943	-0.244
2019-01-14 04:15:00	0	0	0	5.79585	1042.69	59.5851	-0.244
2019-01-14 04:30:00	0	0	0	6.04165	983.559	65.8985	-0.244
2019-01-14 04:45:00	0	0	0	4.97779	966.167	55.3133	-0.244
2019-01-14 05:00:00	0	0	0	6.26951	1007.33	60.1964	-0.244
2019-01-14 05:15:00	0	0	0	5.28189	1007.56	60.0578	-0.244
2019-01-14 05:30:00	0	0	0	6.24844	1000.12	62.2537	-0.244
2019-01-14 05:45:00	0	0	0	5.17976	1003.26	61.7899	-0.244
2019-01-14 06:00:00	0	0	0	5.77985	981.196	60.1403	-0.244
2019-01-14 06:15:00	0	0	0	5.36269	953.411	55.7637	-0.244
2019-01-14 06:30:00	0	0	0	5.94965	989.738	65.3347	-0.244
2019-01-14 06:45:00	0	0	0	6.20337	1018.69	65.6465	-0.244
2019-01-14 07:00:00	0	0	0	5.38111	964.634	65.251	-0.244
2019-01-14 07:15:00	0	0	0	5.24545	1021.42	54.7329	-0.262
2019-01-14 07:30:00	0.067	0	0	5.64091	1014.98	55.4305	-0.222
2019-01-14 07:45:00	2.267	0	0	5.40158	1047.23	60.812	-0.044
2019-01-14 08:00:00	4.933	16.1567	2.41422	5.61943	985.958	58.0145	0.015
2019-01-14 08:15:00	12.067	26.1256	3.90383	6.08846	1015.73	61.8833	1.459
2019-01-14 08:30:00	24.133	35.9061	5.36528	6.41422	1019.81	54.0824	1.951
2019-01-14 08:45:00	23.867	44.9242	6.71281	6.35788	1034.43	51.6352	2.077
2019-01-14 09:00:00	30.533	59.7352	8.92596	7.39115	978.236	49.9284	3.495
2019-01-14 09:15:00	36.667	81.56	12.1871	6.81123	956.118	52.7875	4.064
2019-01-14 09:30:00	59.333	83.1702	12.4277	6.59847	1048.98	57.5893	7.8
2019-01-14 09:45:00	54.2	75.9821	11.3537	8.66308	1030.26	53.8228	4.031
2019-01-14 10:00:00	41.733	89.1982	13.3285	7.38502	1003	54.9184	4.526
2019-01-14 10:15:00	64.2	90.1745	13.4743	7.7753	1046.89	46.535	8.04
2019-01-14 10:30:00	78.267	85.233	12.736	9.8231	983.537	45.0983	8.879
2019-01-14 10:45:00	84	89.2408	13.3348	8.4937	991.944	51.0648	8.772
2019-01-14 11:00:00	63	115.015	17.1861	10.1561	967.008	51.6734	5.424
2019-01-14 11:15:00	47.133	107.796	16.1075	10.1204	974.539	47.2568	6.625
2019-01-14 11:30:00	68.133	115.09	17.1973	9.56482	967.336	50.7524	7.223
2019-01-14 11:45:00	77.933	124.222	18.5619	9.58771	974.29	48.1043	12.544
2019-01-14 12:00:00	90.6	127.666	19.0765	8.67252	975.968	43.6422	7.87
2019-01-14 12:15:00	57.2	123.408	18.4403	10.2172	1046.91	46.0215	5.694
2019-01-14 12:30:00	51.733	104.248	15.5774	8.84576	1046.76	50.4632	5.775
2019-01-14 12:45:00	61.733	119.338	17.8322	10.5145	991.935	47.1345	7.763
2019-01-14 13:00:00	82.667	107.003	15.9889	10.1987	1024.8	51.052	9.152
2019-01-14 13:15:00	74.133	107.671	16.0888	9.04103	953.88	53.5105	7.453
2019-01-14 13:30:00	63.733	132.443	19.7904	10.7146	962.139	52.7692	5.265
2019-01-14 13:45:00	51.4	126.156	18.851	10.0482	1023.59	46.0394	5.335
2019-01-14 14:00:00	40.6	110.051	16.4444	10.7965	991.18	50.9456	3.444
2019-01-14 14:15:00	33.667	101.506	15.1675	9.4327	963.132	54.5397	3.639
2019-01-14 14:30:00	40.6	93.123	13.9149	9.10731	1048.01	50.0192	3.994
2019-01-14 14:45:00	39.4	77.6873	11.6084	8.55643	1049.89	56.7297	3.732
2019-01-14 15:00:00	42.2	60.3063	9.01129	9.96664	1050.82	47.7183	4.205
2019-01-14 15:15:00	38.333	59.8642	8.94522	9.34952	1002.52	59.2824	4.038
2019-01-14 15:30:00	36.2	47.0397	7.02892	8.53614	1001.46	50.2195	4.345
2019-01-14 15:45:00	43.933	37.5034	5.60396	9.51403	1050.76	60.1886	4.138
2019-01-14 16:00:00	24.067	31.2249	4.66579	9.18891	1002.23	52.208	1.714
2019-01-14 16:15:00	16.067	27.6234	4.12764	9.43167	1001.33	55.0909	0.743
2019-01-14 16:30:00	9.133	20.4656	3.05808	8.28857	1004.62	61.4283	0.144
2019-01-14 16:45:00	5.8	11.4783	1.71514	7.76209	1050.45	64.6642	-0.055
2019-01-14 17:00:00	3.733	0	0	8.38776	972.568	63.5861	-0.022
2019-01-14 17:15:00	2.2	0	0	8.93327	956.008	57.6913	-0.188
2019-01-14 17:30:00	0.2	0	0	8.49461	978.907	66.3387	-0.251
2019-01-14 17:45:00	0	0	0	7.79835	977.987	58.3629	-0.273
2019-01-14 18:00:00	0	0	0	7.61228	987.235	71.3798	-0.273
2019-01-14 18:15:00	0	0	0	7.88119	1040.19	61.3196	-0.244
2019-01-14 18:30:00	0	0	0	8.40309	994.136	67.0404	-0.273
2019-01-14 18:45:00	0	0	0	7.46909	1037.43	64.5235	-0.244
2019-01-14 19:00:00	0	0	0	8.52815	1018.61	66.8456	-0.244
2019-01-14 19:15:00	0	0	0	7.22775	1013.53	61.0265	-0.273
2019-01-14 19:30:00	0	0	0	8.14122	985.333	75.0476	-0.244
2019-01-14 19:45:00	0	0	0	8.39903	983.312	65.4356	-0.244
2019-01-14 20:00:00	0	0	0	8.07299	976.286	67.8011	-0.273
2019-01-14 20:15:00	0	0	0	8.71383	967.962	66.7467	-0.244
2019-01-14 20:30:00	0	0	0	8.18227	989.063	63.1998	-0.273
2019-01-14 20:45:00	0	0	0	7.46407	974.956	74.0894	-0.273
2019-01-14 21:00:00	0	0	0	8.44084	988.629	68.5683	-0.273
2019-01-14 21:15:00	0	0	0	7.05008	991.182	64.4926	-0.273
2019-01-14 21:30:00	0	0	0	7.44637	978.222	70.727	-0.303
2019-01-14 21:45:00	0	0	0	6.69613	954.73	64.9144	-0.244
2019-01-14 22:00:00	0	0	0	7.69343	1004.46	64.5887	-0.244
2019-01-14 22:15:00	0	0	0	7.76674	958.489	71.3004	-0.273
2019-01-14 22:30:00	0	0	0	7.37125	1009.45	74.3602	-0.244
2019-01-14 22:45:00	0	0	0	7.54708	1044.38	76.0781	-0.244
2019-01-14 23:00:00	0	0	0	6.55057	1036.85	69.3792	-0.244
2019-01-14 23:15:00	0	0	0	7.07574	1003.36	76.4142	-0.244
2019-01-14 23:30:00	0	0	0	8.16063	978.744	70.8231	-0.244
2019-01-14 23:45:00	0	0	0	7.00055	989.044	67.477	-0.273
2019-01-15 00:00:00	0	0	0	4.90851	1079.38	86.7557	-0.273
2019-01-15 00:15:00	0	0	0	4.22794	1049.28	75.4509	-0.273
2019-01-15 00:30:00	0	0	0	4.85975	1029.11	90.1345	-0.244
2019-01-15 00:45:00	0	0	0	4.65391	987.168	81.719	-0.273
2019-01-15 01:00:00	0	0	0	4.48924	1083.61	79.2367	-0.273
2019-01-15 01:15:00	0	0	0	4.18564	1006.06	73.9113	-0.273
2019-01-15 01:30:00	0	0	0	4.9055	1057.81	79.4108	-0.273
2019-01-15 01:45:00	0	0	0	4.93037	1062.57	86.893	-0.244
2019-01-15 02:00:00	0	0	0	4.94304	1039.6	73.1356	-0.244
2019-01-15 02:15:00	0	0	0	4.92806	1068.93	74.3631	-0.273
2019-01-15 02:30:00	0	0	0	4.82811	1046.31	75.1886	-0.273
2019-01-15 02:45:00	0	0	0	4.62775	1017.54	81.8025	-0.244
2019-01-15 03:00:00	0	0	0	4.43212	1032.08	88.6459	-0.273
2019-01-15 03:15:00	0	0	0	4.81423	1040.83	77.5458	-0.273
2019-01-15 03:30:00	0	0	0	4.09654	1038.83	73.0982	-0.244
2019-01-15 03:45:00	0	0	0	4.70889	1058.21	80.0977	-0.244
2019-01-15 04:00:00	0	0	0	3.81784	1009.48	87.8009	-0.244
2019-01-15 04:15:00	0	0	0	4.19982	983.924	82.8009	-0.244
2019-01-15 04:30:00	0	0	0	3.96768	1066.8	76.911	-0.273
2019-01-15 04:45:00	0	0	0	3.67354	1069.01	72.075	-0.273
2019-01-15 05:00:00	0	0	0	3.56346	1022.08	80.3695	-0.273
2019-01-15 05:15:00	0	0	0	4.23597	984.607	84.3315	-0.244
2019-01-15 05:30:00	0	0	0	4.34017	1076	75.6553	-0.244
2019-01-15 05:45:00	0	0	0	3.94485	1050.56	86.7507	-0.244
2019-01-15 06:00:00	0	0	0	3.8087	1072.77	73.8409	-0.244
2019-01-15 06:15:00	0	0	0	4.15839	998.064	75.4832	-0.244
2019-01-15 06:30:00	0	0	0	4.08437	1026.39	80.5239	-0.244
2019-01-15 06:45:00	0	0	0	3.65426	1013.05	77.3328	-0.244
2019-01-15 07:00:00	0	0	0	4.18847	1070.93	80.1979	-0.244
2019-01-15 07:15:00	0	0	0	4.33548	1045.67	82.0516	-0.262
2019-01-15 07:30:00	0	0	0	4.00879	1082.99	70.9755	-0.262
2019-01-15 07:45:00	0.333	0	0	3.75553	1070.61	85.4335	-0.115
2019-01-15 08:00:00	3.467	19.086	2.85193	4.03487	1047.74	78.4016	0.085
2019-01-15 08:15:00	6.267	33.6783	5.03238	4.03513	986.293	73.4967	0.026
2019-01-15 08:30:00	16.067	54.1713	8.09456	3.54629	1076.17	70.7471	1.973
2019-01-15 08:45:00	31.267	62.7073	9.37006	4.52924	988.105	69.6975	3.662
2019-01-15 09:00:00	42.533	86.022	12.8539	4.55882	994.499	78.2023	4.641
2019-01-15 09:15:00	43.4	90.5227	13.5264	4.26276	984.479	66.194	4.537
2019-01-15 09:30:00	43.2	121.148	18.1026	4.55666	1023.34	72.343	4.874
2019-01-15 09:45:00	46.933	127.839	19.1024	5.28709	1084.23	69.1478	4.707
2019-01-15 10:00:00	41.667	122.88	18.3613	4.92505	1056	71.0679	4.441
2019-01-15 10:15:00	41.067	127.528	19.0558	5.16148	1063.6	66.4614	3.082
2019-01-15 10:30:00	31.933	152.32	22.7605	5.34332	1043.71	68.1534	3.13
2019-01-15 10:45:00	36.8	148.957	22.2579	5.1167	1013.55	67.477	4.438
2019-01-15 11:00:00	45	174.722	26.1079	5.66242	1087.67	68.9578	4.814
2019-01-15 11:15:00	48.333	165.559	24.7387	6.48454	1082.85	69.1845	5.572
2019-01-15 11:30:00	44.8	195.413	29.1996	5.84443	1062.9	63.7573	4.652
2019-01-15 11:45:00	51.333	220.135	32.8937	6.45768	1085.25	65.5267	6.185
2019-01-15 12:00:00	62.333	185.109	27.66	6.57683	1083.75	59.2101	6.662
2019-01-15 12:15:00	65.4	225.652	33.7181	6.943	991.236	57.8044	7.26
2019-01-15 12:30:00	69.8	206.109	30.7978	6.59753	1003.74	53.7475	8.018
2019-01-15 12:45:00	74.333	234.018	34.9681	6.75717	1014.92	55.106	7.955
2019-01-15 13:00:00	75.733	242.534	36.2407	7.84537	1051.2	63.1925	7.552
2019-01-15 13:15:00	73.933	197.869	29.5666	7.60252	1070.34	50.8601	7.9
2019-01-15 13:30:00	73.267	218.997	32.7236	6.41729	1055.85	53.4056	7.22
2019-01-15 13:45:00	67	204.841	30.6085	7.25462	1024.9	54.5927	5.912
2019-01-15 14:00:00	55.733	192.939	28.83	7.72788	1050.24	50.6233	6.056
2019-01-15 14:15:00	53.4	184.949	27.6361	6.81411	1066.77	59.0698	7.024
2019-01-15 14:30:00	69.6	155.444	23.2272	7.64914	1061.88	52.3101	8.339
2019-01-15 14:45:00	72.133	128.185	19.1541	7.34416	1011	52.2257	7.205
2019-01-15 15:00:00	60.133	113.486	16.9577	7.18353	984.463	54.2689	6.248
2019-01-15 15:15:00	58.067	83.4498	12.4695	6.96072	1042.43	58.794	5.176
2019-01-15 15:30:00	49.133	62.6743	9.36513	6.97562	996.503	58.3235	5.247
2019-01-15 15:45:00	47.2	53.8013	8.03927	6.95597	1002.06	66.5654	5.003
2019-01-15 16:00:00	47.133	42.548	6.35775	6.36871	1078.44	59.4229	4.127
2019-01-15 16:15:00	34.867	39.4321	5.89216	5.35208	1026.76	66.1642	2.431
2019-01-15 16:30:00	27.2	24.7316	3.69553	5.9164	1033.75	66.6555	2.42
2019-01-15 16:45:00	22.533	17.451	2.60762	5.20877	1005.1	60.7396	1.777
2019-01-15 17:00:00	15.8	9.94282	1.48571	5.5351	1028.22	69.8127	0.654
2019-01-15 17:15:00	8.467	0	0	4.51614	1024.44	62.765	0.011
2019-01-15 17:30:00	3.133	0	0	5.26006	1014.14	73.7388	-0.1
2019-01-15 17:45:00	0.267	0	0	4.2852	999.041	71.6782	-0.381
2019-01-15 18:00:00	0	0	0	4.2013	1066.61	65.0265	-0.273
2019-01-15 18:15:00	0	0	0	4.06092	1050.94	59.2807	-0.273
2019-01-15 18:30:00	0	0	0	4.03181	1084.5	57.6523	-0.03
2019-01-15 18:45:00	0	0	0	3.954	992.682	64.1133	-0.244
2019-01-15 19:00:00	0	0	0	4.5562	1043.29	60.6102	-0.244
2019-01-15 19:15:00	0	0	0	4.6749	1071.51	63.2819	-0.244
2019-01-15 19:30:00	0	0	0	4.07007	1000.69	68.2345	-0.244
2019-01-15 19:45:00	0	0	0	4.22658	1072.09	56.9687	-0.244
2019-01-15 20:00:00	0	0	0	4.25375	1055.18	61.1545	-0.244
2019-01-15 20:15:00	0	0	0	4.05695	1028.28	59.4628	-0.244
2019-01-15 20:30:00	0	0	0	4.0743	1075.06	60.4678	-0.273
2019-01-15 20:45:00	0	0	0	3.51067	1063.56	64.4141	-0.273
2019-01-15 21:00:00	0	0	0	3.58713	1004.34	54.1675	-0.244
2019-01-15 21:15:00	0	0	0	3.63504	994.292	57.8365	-0.244
2019-01-15 21:30:00	0	0	0	2.99905	1050.29	64.3145	-0.244
2019-01-15 21:45:00	0	0	0	3.17075	1022.29	52.7544	-0.244
2019-01-15 22:00:00	0	0	0	3.20669	1015.38	57.005	-0.244
2019-01-15 22:15:00	0	0	0	2.8668	1024.69	60.5209	-0.244
2019-01-15 22:30:00	0	0	0	3.15688	1004.1	52.61	-0.244
2019-01-15 22:45:00	0	0	0	3.21737	1082.92	57.6699	-0.244
2019-01-15 23:00:00	0	0	0	2.81131	1077.5	59.6493	-0.244
2019-01-15 23:15:00	0	0	0	3.12092	1026.41	57.9556	-0.244
2019-01-15 23:30:00	0	0	0	2.65479	1087.85	60.8121	-0.244
2019-01-15 23:45:00	0	0	0	2.83334	1089.03	60.7907	-0.244
2019-01-16 00:00:00	0	0	0	3.09466	991.065	56.3729	-0.244
2019-01-16 00:15:00	0	0	0	3.12649	1013.5	47.526	-0.244
2019-01-16 00:30:00	0	0	0	3.29465	1013.31	48.5224	-0.244
2019-01-16 00:45:00	0	0	0	2.80085	1004.19	46.0652	-0.244
2019-01-16 01:00:00	0	0	0	2.87993	1023.39	42.9413	-0.244
2019-01-16 01:15:00	0	0	0	2.39677	1073.86	42.2648	-0.244
2019-01-16 01:30:00	0	0	0	2.77927	1037.68	50.8884	-0.244
2019-01-16 01:45:00	0	0	0	2.51654	1062.83	47.0712	-0.244
2019-01-16 02:00:00	0	0	0	2.48475	1038.78	45.0275	-0.244
2019-01-16 02:15:00	0	0	0	2.29966	1006.4	46.3442	-0.244
2019-01-16 02:30:00	0	0	0	2.12444	1030.51	44.5255	-0.244
2019-01-16 02:45:00	0	0	0	1.81491	1011.44	41.8653	-0.244
2019-01-16 03:00:00	0	0	0	1.86606	1042.09	44.3309	-0.244
2019-01-16 03:15:00	0	0	0	1.68085	1020.84	44.9097	-0.244
2019-01-16 03:30:00	0	0	0	1.57013	1042.67	52.7967	-0.244
2019-01-16 03:45:00	0	0	0	1.46806	1056.11	51.9693	-0.244
2019-01-16 04:00:00	0	0	0	1.28758	995.227	55.4508	-0.244
2019-01-16 04:15:00	0	0	0	1.25377	1072.85	47.0603	-0.244
2019-01-16 04:30:00	0	0	0	1.09273	998.438	52.1319	-0.244
2019-01-16 04:45:00	0	0	0	1.10855	1068.88	58.2195	-0.244
2019-01-16 05:00:00	0	0	0	1.14411	1042.72	49.8871	-0.273
2019-01-16 05:15:00	0	0	0	1.00215	1026.89	49.7918	-0.273
2019-01-16 05:30:00	0	0	0	1.09718	1076.03	56.6015	-0.273
2019-01-16 05:45:00	0	0	0	1.01293	1078.85	57.0656	-0.273
2019-01-16 06:00:00	0	0	0	1.02892	1019.76	56.2636	-0.273
2019-01-16 06:15:00	0	0	0	0.893253	1042.47	49.9764	-0.273
2019-01-16 06:30:00	0	0	0	0.955289	1021.16	49.6436	-0.273
2019-01-16 06:45:00	0	0	0	0.753184	1082.58	59.9248	-0.273
2019-01-16 07:00:00	0	0	0	0.727611	989.695	49.5113	-0.303
2019-01-16 07:15:00	0	0	0	0.725738	1025.16	50.5651	-0.303
2019-01-16 07:30:00	0.667	0	0	0.739292	1006.77	55.7374	0.14
2019-01-16 07:45:00	10.867	0	0	0.849874	1024.1	59.6594	2.18
2019-01-16 08:00:00	35.6	11.106	1.65952	0.772067	1068.61	59.38	5.01
2019-01-16 08:15:00	47.333	21.2844	3.18042	0.804216	1067.65	56.7914	4.91
2019-01-16 08:30:00	62.6	34.3843	5.13789	0.734298	1033.52	56.5158	9.063
2019-01-16 08:45:00	115.667	40.7966	6.09604	0.80837	996.213	60.1631	19.941
2019-01-16 09:00:00	191.067	62.132	9.28409	0.798618	1028.13	54.9574	29.622
2019-01-16 09:15:00	246.867	67.7228	10.1195	0.910892	989.597	59.2557	38.205
2019-01-16 09:30:00	308.067	83.9951	12.551	0.778835	1046.42	55.8333	45.48
2019-01-16 09:45:00	355.867	103.369	15.4459	0.796325	1080.06	56.0752	46.285
2019-01-16 10:00:00	227.067	105.907	15.8251	0.984243	1014.94	69.6779	27.885
2019-01-16 10:15:00	235.467	118.173	17.658	0.98294	1017.82	66.7017	38.319
2019-01-16 10:30:00	281.333	131.482	19.6468	1.13649	1047.44	60.7633	49.585
2019-01-16 10:45:00	312.067	176.638	26.3942	1.16205	985.856	58.2998	34.41
2019-01-16 11:00:00	314.867	196.973	29.4328	1.19704	1002.59	68.2814	51.957
2019-01-16 11:15:00	324.267	234.126	34.9844	1.32071	1014.24	64.5491	53.531
2019-01-16 11:30:00	476.6	249.539	37.2874	1.31691	1060.1	66.164	79.753
2019-01-16 11:45:00	588.933	244.656	36.5578	1.79682	1020.04	64.4099	64.261
2019-01-16 12:00:00	388.933	319.342	47.7177	1.7495	1011.83	65.2314	33.616
2019-01-16 12:15:00	408.267	296.38	44.2866	2.30714	1061.91	63.0449	58.452
2019-01-16 12:30:00	273.6	354.756	53.0096	2.48479	1025	65.8648	45.857
2019-01-16 12:45:00	314.733	310.835	46.4467	2.6046	1011.79	67.8451	30.937
2019-01-16 13:00:00	426.733	332.376	49.6655	2.84539	1019.96	58.1066	88.144
2019-01-16 13:15:00	559.667	303.342	45.3269	3.45225	1028.7	58.6408	77.629
2019-01-16 13:30:00	397.4	312.844	46.7468	3.45667	1063.7	58.2291	56.357
2019-01-16 13:45:00	488.667	291.182	43.51	3.7219	1030.7	61.667	35.544
2019-01-16 14:00:00	459.867	319.945	47.8078	3.92179	995.644	63.1365	78.833
2019-01-16 14:15:00	469.4	270.136	40.3651	3.95598	995.884	59.4244	75.641
2019-01-16 14:30:00	515.667	266.287	39.7901	3.49879	987.506	58.6538	71.554
2019-01-16 14:45:00	486.667	240.375	35.9181	3.99259	1004.61	68.5678	67.121
2019-01-16 15:00:00	449.533	215.685	32.2287	3.44539	1043.51	62.5426	61.626
2019-01-16 15:15:00	408.2	196.336	29.3376	3.34413	1015.52	68.7238	56.047
2019-01-16 15:30:00	365.867	162.164	24.2314	4.04551	1024	69.4182	49.481
2019-01-16 15:45:00	321.267	127.809	19.0979	3.62494	986.434	70.1898	42.177
2019-01-16 16:00:00	275.733	107.092	16.0022	3.92171	1030.37	66.803	33.789
2019-01-16 16:15:00	231.067	88.6192	13.242	3.965	1060.12	69.8134	23.895
2019-01-16 16:30:00	183.933	64.9443	9.70432	4.05084	990.669	61.091	15.315
2019-01-16 16:45:00	136.667	46.7756	6.98946	4.08609	1028.78	63.215	10.002
2019-01-16 17:00:00	92.8	25.146	3.75745	3.89494	1067.92	59.2379	6.399
2019-01-16 17:15:00	53.4	13.5138	2.0193	3.75464	1009.77	63.854	3.44
2019-01-16 17:30:00	24.467	0	0	3.09577	1020.93	70.5323	0.913
2019-01-16 17:45:00	4.6	0	0	3.31036	1005.22	64.3202	-0.2
2019-01-16 18:00:00	0	0	0	3.24371	1060.74	70.5006	-0.273
2019-01-16 18:15:00	0	0	0	2.92297	1069.74	66.8656	-0.244
2019-01-16 18:30:00	0	0	0	2.41005	1013.17	71.3367	-0.244
2019-01-16 18:45:00	0	0	0	1.82618	1073.42	71.7578	-0.244
2019-01-16 19:00:00	0	0	0	1.71751	1013.04	73.8805	-0.244
2019-01-16 19:15:00	0	0	0	1.32274	1059.65	72.9993	-0.244
2019-01-16 19:30:00	0	0	0	1.08932	1045.62	87.4684	-0.244
2019-01-16 19:45:00	0	0	0	0.885858	983.375	80.7166	-0.244
2019-01-16 20:00:00	0	0	0	0.789039	1004.53	81.4799	-0.244
2019-01-16 20:15:00	0	0	0	0.552963	1063.97	73.7902	-0.244
2019-01-16 20:30:00	0	0	0	0.50774	996.227	88.2223	-0.244
2019-01-16 20:45:00	0	0	0	0.40311	1065.41	81.2588	-0.233
2019-01-16 21:00:00	0	0	0	0.269335	988.63	83.9934	-0.244
2019-01-16 21:15:00	0	0	0	0.170354	1061.5	87.8834	-0.244
2019-01-16 21:30:00	0	0	0	0.0945783	1073.56	78.5443	-0.244
2019-01-16 21:45:00	0	0	0	0.0211233	1085.19	79.3933	-0.244
2019-01-16 22:00:00	0	0	0	-0.0634944	997.692	88.1748	-0.244
2019-01-16 22:15:00	0	0	0	-0.114655	994.543	81.0132	-0.244
2019-01-16 22:30:00	0	0	0	-0.205739	1065.02	92.6519	-0.244
2019-01-16 22:45:00	0	0	0	-0.222834	999.514	86.7739	-0.244
2019-01-16 23:00:00	0	0	0	-0.296046	1055.39	85.9127	-0.244
2019-01-16 23:15:00	0	0	0	-0.393529	1077.41	79.6448	-0.244
2019-01-16 23:30:00	0	0	0	-0.376456	1051.41	76.4517	-0.244
2019-01-16 23:45:00	0	0	0	-0.404942	1064.68	84.6541	-0.244
2019-01-17 00:00:00	0	0	0	-0.604143	970.448	83.8153	-0.244
2019-01-17 00:15:00	0	0	0	1.97329	1040.27	76.3642	-0.244
2019-01-17 00:30:00	0	0	0	1.83034	1065.92	78.2635	-0.244
2019-01-17 00:45:00	0	0	0	1.47692	975.382	71.9268	-0.244
2019-01-17 01:00:00	0	0	0	1.46376	1023.37	86.8255	-0.244
2019-01-17 01:15:00	0	0	0	1.44919	1031.28	83.2067	-0.244
2019-01-17 01:30:00	0	0	0	1.17994	1016.81	85.9894	-0.244
2019-01-17 01:45:00	0	0	0	1.12555	1034.78	81.652	-0.244
2019-01-17 02:00:00	0	0	0	0.909541	1063.51	83.5049	-0.244
2019-01-17 02:15:00	0	0	0	0.751778	1036.94	88.2353	-0.244
2019-01-17 02:30:00	0	0	0	0.538142	1034.86	75.8746	-0.244
2019-01-17 02:45:00	0	0	0	0.42	978.805	78.9658	-0.273
2019-01-17 03:00:00	0	0	0	0.240048	991.304	89.1986	-0.273
2019-01-17 03:15:00	0	0	0	0.0308011	999.483	84.6901	-0.273
2019-01-17 03:30:00	0	0	0	-0.154152	1021.63	93.3759	-0.273
2019-01-17 03:45:00	0	0	0	-0.313277	1068.37	82.8302	-0.273
2019-01-17 04:00:00	0	0	0	-0.44803	975.871	96.9193	-0.273
2019-01-17 04:15:00	0	0	0	-0.709336	1003.16	86.0322	-0.273
2019-01-17 04:30:00	0	0	0	-0.770995	978.286	91.5826	-0.273
2019-01-17 04:45:00	0	0	0	-0.980934	1017.33	80.6844	-0.273
2019-01-17 05:00:00	0	0	0	-1.03421	1009.81	95.5862	-0.273
2019-01-17 05:15:00	0	0	0	-1.01682	1009.9	86.6035	-0.273
2019-01-17 05:30:00	0	0	0	-1.02815	1068.73	97.5163	-0.273
2019-01-17 05:45:00	0	0	0	-1.22204	1026.81	94.5297	-0.273
2019-01-17 06:00:00	0	0	0	-1.06342	975.739	94.4904	-0.244
2019-01-17 06:15:00	0	0	0	-1.1012	1026.52	79.8005	-0.244
2019-01-17 06:30:00	0	0	0	-1.32936	1018.15	97.3079	-0.273
2019-01-17 06:45:00	0	0	0	-1.26489	1005.13	95.2489	-0.273
2019-01-17 07:00:00	0	0	0	-1.24474	1045.15	93.0162	-0.273
2019-01-17 07:15:00	0	0	0	-1.5522	993.184	88.4179	-0.273
2019-01-17 07:30:00	0.933	0	0	-1.49676	1056.59	96.1979	0.118
2019-01-17 07:45:00	11.333	22.3091	3.33355	-1.40959	1014.75	93.6403	1.969
2019-01-17 08:00:00	32.933	47.5433	7.10417	-1.41248	1046.2	80.9871	4.933
2019-01-17 08:15:00	57	89.0105	13.3004	-1.31036	976.756	78.3476	8.539
2019-01-17 08:30:00	83.867	107.188	16.0167	-0.935012	984.345	91.0991	12.987
2019-01-17 08:45:00	135.867	144.597	21.6064	-0.288595	992.94	85.0855	19.328
2019-01-17 09:00:00	185.2	208.91	31.2164	0.501796	990.503	77.758	27.242
2019-01-17 09:15:00	234.6	225.598	33.71	1.31186	987.973	80.7669	35.182
2019-01-17 09:30:00	280.267	270.776	40.4608	2.31228	997.652	66.5992	42.121
2019-01-17 09:45:00	329.2	290.178	43.3599	3.0607	1031.94	74.2159	49.249
2019-01-17 10:00:00	372.933	328.396	49.0707	4.71638	1014.44	69.4714	55.168
2019-01-17 10:15:00	416.133	353.542	52.8281	4.85967	1055.89	68.2467	60.599
2019-01-17 10:30:00	457.467	353.836	52.8721	5.74496	1010.34	59.672	65.384
2019-01-17 10:45:00	482.133	370.84	55.4128	6.64461	1047.57	59.6206	68.702
2019-01-17 11:00:00	505	420.544	62.8399	7.12022	1066.07	51.5321	72.537
2019-01-17 11:15:00	535.6	391.68	58.5269	8.01626	982.128	55.7443	75.67
2019-01-17 11:30:00	558.333	433.065	64.7109	7.6733	983.78	59.5891	78.187
2019-01-17 11:45:00	570.267	459.501	68.6611	7.47988	1027.78	51.2064	79.738
2019-01-17 12:00:00	585	555.488	83.004	9.3672	970.307	50.2118	80.448
2019-01-17 12:15:00	586.4	468.185	69.9587	8.70074	970.426	49.8528	79.572
2019-01-17 12:30:00	586.733	542.392	81.0471	9.64242	1060.53	53.8191	78.545
2019-01-17 12:45:00	590.8	508.028	75.9122	10.2935	1000.64	49.4019	79.827
2019-01-17 13:00:00	595.8	511.477	76.4276	11.161	1055.41	47.331	79.679
2019-01-17 13:15:00	584.333	550.669	82.2839	10.1717	1064.24	52.382	78.7
2019-01-17 13:30:00	581.667	591.75	88.4224	9.35887	999.402	48.7776	76.672
2019-01-17 13:45:00	558.2	488.149	72.9418	11.0414	1062.46	44.4626	74.281
2019-01-17 14:00:00	539.6	537.131	80.2609	10.6526	980.013	50.6975	71.942
2019-01-17 14:15:00	526.133	423.847	63.3335	11.5214	1008.73	51.1599	69.031
2019-01-17 14:30:00	504.4	454.648	67.9359	10.5887	992.717	47.6198	66.515
2019-01-17 14:45:00	470.4	380.918	56.9188	10.4423	1051.22	51.2496	61.926
2019-01-17 15:00:00	438.533	395.624	59.1163	9.65959	1067.74	49.0965	56.997
2019-01-17 15:15:00	399.133	323.88	48.3959	10.0697	1008.8	52.3376	50.35
2019-01-17 15:30:00	355.2	337	50.3563	10.4583	975.72	54.88	44.741
2019-01-17 15:45:00	311.733	245.706	36.7147	10.8109	990.967	58.7422	38.526
2019-01-17 16:00:00	267.8	247.455	36.976	9.29379	983.785	49.0017	30.686
2019-01-17 16:15:00	221.133	197.819	29.5592	9.95424	1034.39	49.6158	22.72
2019-01-17 16:30:00	173.267	123.869	18.5091	9.76054	982.922	58.9125	15.153
2019-01-17 16:45:00	128.667	84.5691	12.6368	8.12045	979.506	54.7854	10.279
2019-01-17 17:00:00	88.933	53.2809	7.96151	8.25756	1005.49	57.1227	6.503
2019-01-17 17:15:00	52.467	24.8903	3.71924	9.10282	1009.19	55.8606	3.388
2019-01-17 17:30:00	23.8	0	0	8.62653	1011.8	54.5244	0.975
2019-01-17 17:45:00	5.4	0	0	8.08831	1038.65	54.4467	-0.137
2019-01-17 18:00:00	0	0	0	8.02634	983.1	55.8212	-0.251
2019-01-17 18:15:00	0	0	0	6.38702	1049.45	59.7423	-0.233
2019-01-17 18:30:00	0	0	0	6.82732	1041.17	56.8675	-0.233
2019-01-17 18:45:00	0	0	0	6.14601	1035.32	58.8361	-0.233
2019-01-17 19:00:00	0	0	0	5.15008	994.415	69.1438	-0.233
2019-01-17 19:15:00	0	0	0	5.57798	1027.21	62.9473	-0.244
2019-01-17 19:30:00	0	0	0	4.74742	977.542	72.9611	-0.244
2019-01-17 19:45:00	0	0	0	4.89569	977.792	68.5782	-0.233
2019-01-17 20:00:00	0	0	0	4.47115	1059.09	64.533	-0.233
2019-01-17 20:15:00	0	0	0	4.17281	1040.55	73.898	-0.233
2019-01-17 20:30:00	0	0	0	4.24024	1038.83	62.3869	-0.233
2019-01-17 20:45:00	0	0	0	3.95307	976.075	70.7769	-0.244
2019-01-17 21:00:00	0	0	0	3.14016	1008.19	69.5161	-0.244
2019-01-17 21:15:00	0	0	0	2.89421	1034.15	66.4238	-0.244
2019-01-17 21:30:00	0	0	0	2.77774	1014.52	76.1586	-0.244
2019-01-17 21:45:00	0	0	0	2.6747	974.26	70.3982	-0.244
2019-01-17 22:00:00	0	0	0	2.64781	1013.16	79.9759	-0.244
2019-01-17 22:15:00	0	0	0	2.12199	969.485	75.8282	-0.244
2019-01-17 22:30:00	0	0	0	2.06385	1031.64	82.4269	-0.244
2019-01-17 22:45:00	0	0	0	2.33712	1036.49	86.4715	-0.244
2019-01-17 23:00:00	0	0	0	2.10151	989.647	79.468	-0.244
2019-01-17 23:15:00	0	0	0	1.9304	1046.74	74.5594	-0.244
2019-01-17 23:30:00	0	0	0	1.81279	1054.57	74.6459	-0.244
2019-01-17 23:45:00	0	0	0	1.97102	970.167	86.946	-0.244
2019-01-18 00:00:00	0	0	0	2.12749	1006.15	88.282	-0.244
2019-01-18 00:15:00	0	0	0	1.2293	1080.09	98.7667	-0.244
2019-01-18 00:30:00	0	0	0	1.15755	993.486	93.0971	-0.244
2019-01-18 00:45:00	0	0	0	1.02446	1075.35	83.7854	-0.244
2019-01-18 01:00:00	0	0	0	0.978645	1005.85	82.4718	-0.244
2019-01-18 01:15:00	0	0	0	1.04757	1037.73	100	-0.244
2019-01-18 01:30:00	0	0	0	0.892741	1032.09	87.4229	-0.244
2019-01-18 01:45:00	0	0	0	0.999179	1058.89	96.4557	-0.244
2019-01-18 02:00:00	0	0	0	0.914031	1036.77	88.4639	-0.244
2019-01-18 02:15:00	0	0	0	0.852768	1000.52	100	-0.244
2019-01-18 02:30:00	0	0	0	0.732935	986.843	91.6837	-0.244
2019-01-18 02:45:00	0	0	0	0.695802	992.325	92.2211	-0.244
2019-01-18 03:00:00	0	0	0	0.668111	1042.52	91.5009	-0.244
2019-01-18 03:15:00	0	0	0	0.57443	1051.61	85.5247	-0.244
2019-01-18 03:30:00	0	0	0	0.548572	993.225	88.3815	-0.244
2019-01-18 03:45:00	0	0	0	0.464342	993.219	92.4812	-0.244
2019-01-18 04:00:00	0	0	0	0.479082	1082.73	96.3397	-0.244
2019-01-18 04:15:00	0	0	0	0.470505	1026.06	100	-0.244
2019-01-18 04:30:00	0	0	0	0.376749	1068.97	89.3021	-0.244
2019-01-18 04:45:00	0	0	0	0.376558	1072.45	99.522	-0.244
2019-01-18 05:00:00	0	0	0	0.412023	1020.31	98.9557	-0.244
2019-01-18 05:15:00	0	0	0	0.374959	1004.65	85.5159	-0.244
2019-01-18 05:30:00	0	0	0	0.438236	1050.4	89.3417	-0.244
2019-01-18 05:45:00	0	0	0	0.424299	1085.68	85.3034	-0.244
2019-01-18 06:00:00	0	0	0	0.472346	1043.33	95.2958	-0.244
2019-01-18 06:15:00	0	0	0	0.535914	1011.51	83.3194	-0.244
2019-01-18 06:30:00	0	0	0	0.656324	986.004	92.6309	-0.233
2019-01-18 06:45:00	0	0	0	0.60401	1058.74	94.2109	-0.244
2019-01-18 07:00:00	0	0	0	0.726491	1071.5	99.5811	-0.233
2019-01-18 07:15:00	0	0	0	0.843818	994.685	86.7289	-0.262
2019-01-18 07:30:00	0.6	0	0	1.00432	1060.46	86.7382	0.085
2019-01-18 07:45:00	9.2	17.9259	2.67859	1.15274	1043.24	92.0539	1.471
2019-01-18 08:00:00	28.733	40.2762	6.01828	1.16029	1083.96	98.4648	4.035
2019-01-18 08:15:00	38.2	71.3288	10.6583	1.62664	1080.45	78.4298	4.752
2019-01-18 08:30:00	30.667	101.053	15.0999	2.24568	1006.61	85.5798	2.723
2019-01-18 08:45:00	36.867	148.607	22.2057	2.84643	1055.58	87.6048	3.887
2019-01-18 09:00:00	46.867	190.68	28.4924	3.95988	1074.15	86.4645	3.865
2019-01-18 09:15:00	48.6	188.75	28.2039	4.0677	1004.67	72.8888	4.999
2019-01-18 09:30:00	68.133	249.521	37.2847	6.05738	1057.05	84.149	7.578
2019-01-18 09:45:00	101.733	236.798	35.3836	6.8564	997.781	77.8849	9.95
2019-01-18 10:00:00	112.333	290.879	43.4647	8.2304	1007.2	73.426	10.774
2019-01-18 10:15:00	111.6	300.428	44.8915	7.90929	1022.76	65.6398	11.739
2019-01-18 10:30:00	103	298.201	44.5587	9.81181	1030.24	60.021	11.894
2019-01-18 10:45:00	100.2	333.685	49.8609	10.5558	1020.59	55.4891	12.836
2019-01-18 11:00:00	120.533	349.595	52.2383	11.6758	1016.03	57.1416	12.773
2019-01-18 11:15:00	142.333	321.726	48.074	12.6292	1006.3	65.8866	13.756
2019-01-18 11:30:00	141.667	377.774	56.4489	13.2864	1007.93	61.7055	14.543
2019-01-18 11:45:00	130.867	375.804	56.1546	13.4345	986.581	57.6559	15.164
2019-01-18 12:00:00	112.867	379.956	56.775	11.8574	1046.92	60.5412	15.459
2019-01-18 12:15:00	138.6	410.422	61.3274	13.6999	1015.51	53.1091	16.453
2019-01-18 12:30:00	152.067	406.993	60.8151	12.8205	993.054	54.936	17.805
2019-01-18 12:45:00	164.333	406.034	60.6718	15.6939	1037.21	58.823	18.308
2019-01-18 13:00:00	150.733	438.866	65.5777	15.6393	1014.59	49.0995	17.129
2019-01-18 13:15:00	121.467	465.405	69.5433	14.8344	1020.63	48.0583	11.037
2019-01-18 13:30:00	72.267	461.235	68.9202	16.0138	1084.25	54.6807	7.973
2019-01-18 13:45:00	67.467	389.35	58.1788	14.2232	982.899	50.0688	6.85
2019-01-18 14:00:00	80.267	414.435	61.9271	13.2632	983.987	50.7459	9.307
2019-01-18 14:15:00	135.667	337.744	50.4674	15.9255	1006.57	55.0877	19.963
2019-01-18 14:30:00	191.667	382.872	57.2108	13.2851	1052.93	51.3342	16.091
2019-01-18 14:45:00	159.733	315.266	47.1088	15.5282	1014.26	48.5857	15.947
2019-01-18 15:00:00	118.867	270.143	40.3662	16.1808	1049.97	53.3344	9.3
2019-01-18 15:15:00	75.2	241.521	36.0893	14.9741	1066.93	57.2845	6.555
2019-01-18 15:30:00	54.267	217.34	32.4761	13.1337	1063.5	55.8145	6.233
2019-01-18 15:45:00	56.467	232.53	34.7459	15.3896	1060.02	60.3198	7.053
2019-01-18 16:00:00	80	190.743	28.5018	14.2903	984.749	58.7817	7.822
2019-01-18 16:15:00	56.867	159.351	23.8111	14.6018	987.705	65.6384	7.685
2019-01-18 16:30:00	65.267	101.88	15.2235	12.4695	985.978	63.9247	5.147
2019-01-18 16:45:00	64.933	73.0745	10.9192	12.827	1077.41	65.4037	5.276
2019-01-18 17:00:00	34.267	49.102	7.33708	12.0955	1006.9	75.6422	2.324
2019-01-18 17:15:00	15	24.6367	3.68134	12.3474	1065.13	76.104	0.126
2019-01-18 17:30:00	5.4	0	0	11.0144	1011.44	78.8044	-0.2
2019-01-18 17:45:00	0.333	0	0	12.7577	1046.98	68.4949	-0.285
2019-01-18 18:00:00	0	0	0	11.4327	1060.06	71.8892	-0.273
2019-01-18 18:15:00	0	0	0	10.456	1047.23	76.5272	-0.273
2019-01-18 18:30:00	0	0	0	10.278	1040.96	82.0266	-0.273
2019-01-18 18:45:00	0	0	0	9.82918	1044.23	79.6821	-0.273
2019-01-18 19:00:00	0	0	0	9.35134	993.576	87.8234	-0.273
2019-01-18 19:15:00	0	0	0	7.67957	1025.16	83.1629	-0.273
2019-01-18 19:30:00	0	0	0	8.62636	997.274	95.4218	-0.233
2019-01-18 19:45:00	0	0	0	7.99781	1014.93	94.832	-0.273
2019-01-18 20:00:00	0	0	0	7.99871	1077.15	84.62	-0.273
2019-01-18 20:15:00	0	0	0	6.53614	1083.65	94.8648	-0.273
2019-01-18 20:30:00	0	0	0	7.14139	996.433	90.0545	-0.273
2019-01-18 20:45:00	0	0	0	6.03705	1075.24	94.3558	-0.273
2019-01-18 21:00:00	0	0	0	6.95746	1042.77	84.3246	-0.273
2019-01-18 21:15:00	0	0	0	6.0309	1050.75	100	-0.273
2019-01-18 21:30:00	0	0	0	6.79727	1030.87	97.5326	-0.244
2019-01-18 21:45:00	0	0	0	6.02795	1005.76	96.3836	-0.244
2019-01-18 22:00:00	0	0	0	6.77233	983.861	98.4189	-0.273
2019-01-18 22:15:00	0	0	0	5.76066	985.39	96.5824	-0.273
2019-01-18 22:30:00	0	0	0	6.13632	1012.69	87.9078	-0.273
2019-01-18 22:45:00	0	0	0	6.96558	985.051	92.9287	-0.262
2019-01-18 23:00:00	0	0	0	5.70792	994.556	99.0081	-0.244
2019-01-18 23:15:00	0	0	0	6.31005	1019.04	93.9021	-0.233
2019-01-18 23:30:00	0	0	0	6.12759	1019.59	100	-0.273
2019-01-18 23:45:00	0	0	0	5.57635	1032.94	100	-0.244
2019-01-19 00:00:00	0	0	0	6.44298	1043.09	74.267	-0.244
2019-01-19 00:15:00	0	0	0	6.72756	980.236	66.8956	-0.244
2019-01-19 00:30:00	0	0	0	6.45232	1050.62	62.2277	-0.233
2019-01-19 00:45:00	0	0	0	6.40831	998.5	70.3415	-0.244
2019-01-19 01:00:00	0	0	0	6.50845	1028.26	67.6759	-0.244
2019-01-19 01:15:00	0	0	0	6.66025	1064.38	69.6793	-0.233
2019-01-19 01:30:00	0	0	0	5.98149	1062.34	66.6823	-0.244
2019-01-19 01:45:00	0	0	0	6.20576	996.276	66.8846	-0.244
2019-01-19 02:00:00	0	0	0	6.37578	1049.94	63.9431	-0.233
2019-01-19 02:15:00	0	0	0	7.33789	1055.98	68.8959	-0.244
2019-01-19 02:30:00	0	0	0	5.95668	988.162	70.6633	-0.244
2019-01-19 02:45:00	0	0	0	5.91566	1022.81	65.9121	-0.273
2019-01-19 03:00:00	0	0	0	5.93033	1061.85	71.6971	-0.244
2019-01-19 03:15:00	0	0	0	6.00806	1015.84	62.1598	-0.244
2019-01-19 03:30:00	0	0	0	6.03348	1044.67	71.1669	-0.244
2019-01-19 03:45:00	0	0	0	6.25342	992.676	75.7167	-0.273
2019-01-19 04:00:00	0	0	0	6.1829	1046.08	63.5472	-0.244
2019-01-19 04:15:00	0	0	0	5.81155	1013.3	65.6432	-0.244
2019-01-19 04:30:00	0	0	0	5.61182	1015.91	64.2705	-0.244
2019-01-19 04:45:00	0	0	0	5.82076	1000.18	64.4273	-0.273
2019-01-19 05:00:00	0	0	0	6.49483	1034.92	62.6685	-0.273
2019-01-19 05:15:00	0	0	0	6.32871	973.411	72.1042	-0.262
2019-01-19 05:30:00	0	0	0	5.69693	1006	65.6203	-0.244
2019-01-19 05:45:00	0	0	0	5.92026	1012.96	74.5307	-0.273
2019-01-19 06:00:00	0	0	0	6.61847	1024.27	66.2485	-0.233
2019-01-19 06:15:00	0	0	0	6.88538	972.857	72.4043	-0.273
2019-01-19 06:30:00	0	0	0	5.97367	1072.4	66.6103	-0.273
2019-01-19 06:45:00	0	0	0	6.88509	1040.93	74.1764	-0.273
2019-01-19 07:00:00	0	0	0	6.63549	989.06	72.1885	-0.273
2019-01-19 07:15:00	0	0	0	6.62507	994.589	71.3677	-0.273
2019-01-19 07:30:00	0	0	0	6.93278	997.236	68.5804	-0.273
2019-01-19 07:45:00	1.333	0	0	7.0561	1045.5	62.7173	-0.011
2019-01-19 08:00:00	6.867	13.4684	2.01252	6.49915	991.06	64.5785	0.307
2019-01-19 08:15:00	12.933	26.4722	3.95562	7.55303	1043.04	62.0796	1.156
2019-01-19 08:30:00	22.2	36.0447	5.38599	7.55267	983.114	62.6975	2.309
2019-01-19 08:45:00	29.4	44.5706	6.65997	7.17875	1032.87	64.7918	3.17
2019-01-19 09:00:00	39.933	54.4263	8.13267	7.93261	1052.63	65.7979	4.242
2019-01-19 09:15:00	57.933	64.8202	9.68578	8.66794	983.625	58.7418	6.64
2019-01-19 09:30:00	72.133	62.1467	9.28628	8.34469	1065.01	60.5984	7.342
2019-01-19 09:45:00	58	73.3271	10.9569	8.25224	1013.59	57.0022	5.265
2019-01-19 10:00:00	52.867	64.8693	9.69312	9.2271	1046.76	61.1587	6.492
2019-01-19 10:15:00	72.467	83.4283	12.4663	9.1902	988.308	63.7109	8.875
2019-01-19 10:30:00	84.267	73.8552	11.0358	10.6725	1067.74	57.6023	9.729
2019-01-19 10:45:00	98.667	87.4201	13.0628	10.7665	999.518	62.5537	11.288
2019-01-19 11:00:00	118.8	81.4591	12.1721	10.2817	1054.51	53.1257	14.439
2019-01-19 11:15:00	126.6	86.6618	12.9495	9.50388	981.598	62.3965	13.242
2019-01-19 11:30:00	101.8	91.0583	13.6064	9.4007	1040.08	59.5159	11.306
2019-01-19 11:45:00	106.333	88.2422	13.1856	10.8563	1004.52	57.937	12.156
2019-01-19 12:00:00	101.733	92.9286	13.8859	10.4462	1013.48	58.9914	10.756
2019-01-19 12:15:00	87.933	87.8837	13.1321	10.5476	1025.48	58.8341	10.087
2019-01-19 12:30:00	78.6	89.8568	13.4269	10.043	974.425	62.9032	7.249
2019-01-19 12:45:00	56.6	92.3941	13.806	9.08287	1006.7	59.5237	5.989
2019-01-19 13:00:00	50.933	82.2053	12.2835	9.12103	1069.89	63.9355	6.732
2019-01-19 13:15:00	60.4	91.0844	13.6103	10.2286	1064.25	61.6809	5.465
2019-01-19 13:30:00	54.933	92.9639	13.8912	8.76178	999.238	60.5132	6.477
2019-01-19 13:45:00	61.067	91.365	13.6522	10.1167	1034.22	52.8157	6.691
2019-01-19 14:00:00	64.933	82.4268	12.3167	9.77764	1070.84	62.0484	7.464
2019-01-19 14:15:00	67.2	67.6613	10.1103	9.46594	1050.69	53.4381	6.566
2019-01-19 14:30:00	64.467	68.5077	10.2368	10.8611	1063.66	58.8329	6.636
2019-01-19 14:45:00	64.867	50.1046	7.48689	8.83009	982.015	58.9351	6.218
2019-01-19 15:00:00	52.867	51.8793	7.75208	10.1515	1004.24	53.3022	5.088
2019-01-19 15:15:00	45.267	38.3648	5.73267	10.1433	1048.76	57.5651	4.404
2019-01-19 15:30:00	42.6	39.2061	5.85839	10.75	1007.7	57.4852	3.809
2019-01-19 15:45:00	38.333	31.9882	4.77985	8.43696	1038.5	63.7376	3.414
2019-01-19 16:00:00	28.933	23.5473	3.51857	10.1654	1062.65	65.0166	2.331
2019-01-19 16:15:00	0	21.3952	3.19699	8.53375	1058.1	64.7042	1.589
2019-01-19 16:30:00	16	13.9979	2.09165	8.86673	1056.35	71.7706	1.153
2019-01-19 16:45:00	13.933	9.10475	1.36048	9.35374	981.134	70.6214	0.587
2019-01-19 17:00:00	10	0	0	9.37379	989.841	58.6393	0.067
2019-01-19 17:15:00	4.6	0	0	9.55634	1036.22	61.5186	-0.115
2019-01-19 17:30:00	2.333	0	0	9.17442	992.958	60.8648	-0.251
2019-01-19 17:45:00	0.067	0	0	9.31648	1063.1	61.1178	-0.303
2019-01-19 18:00:00	0	0	0	8.84145	1066.29	65.1126	-0.303
2019-01-19 18:15:00	0	0	0	8.58255	997.029	69.1022	-0.273
2019-01-19 18:30:00	0	0	0	9.25591	1019.52	71.2548	-0.273
2019-01-19 18:45:00	0	0	0	7.68511	1050.2	59.3599	-0.273
2019-01-19 19:00:00	0	0	0	8.18927	976.871	65.1593	-0.273
2019-01-19 19:15:00	0	0	0	7.87823	1054.85	58.4855	-0.273
2019-01-19 19:30:00	0	0	0	7.03491	1037.78	69.1635	-0.273
2019-01-19 19:45:00	0	0	0	7.62343	1035.34	59.3801	-0.273
2019-01-19 20:00:00	0	0	0	7.12031	1027.54	57.2726	-0.273
2019-01-19 20:15:00	0	0	0	7.8664	1038.73	63.4043	-0.273
2019-01-19 20:30:00	0	0	0	7.71612	1016.37	66.5623	-0.273
2019-01-19 20:45:00	0	0	0	7.05131	1026.7	63.202	-0.273
2019-01-19 21:00:00	0	0	0	8.06622	1030.77	64.0902	-0.273
2019-01-19 21:15:00	0	0	0	7.75423	1064.89	69.8017	-0.273
2019-01-19 21:30:00	0	0	0	6.44928	1027.68	62.1154	-0.303
2019-01-19 21:45:00	0	0	0	6.58358	1013.7	70.4233	-0.244
2019-01-19 22:00:00	0	0	0	6.65739	988.149	59.3133	-0.244
2019-01-19 22:15:00	0	0	0	6.36249	1005.78	62.613	-0.244
2019-01-19 22:30:00	0	0	0	7.4481	978.632	63.0534	-0.244
2019-01-19 22:45:00	0	0	0	6.93891	1075.11	58.4113	-0.244
2019-01-19 23:00:00	0	0	0	7.44752	1026.81	62.6557	-0.244
2019-01-19 23:15:00	0	0	0	6.65182	1074.79	58.4679	-0.244
2019-01-19 23:30:00	0	0	0	7.44688	1062.45	68.9782	-0.244
2019-01-19 23:45:00	0	0	0	6.76315	1033.47	60.935	-0.244
2019-01-20 00:00:00	0	0	0	5.44301	972.546	74.143	-0.244
2019-01-20 00:15:00	0	0	0	7.37076	1065.73	76.8011	-0.244
2019-01-20 00:30:00	0	0	0	7.05417	1050.9	66.0216	-0.244
2019-01-20 00:45:00	0	0	0	7.47826	1030.81	71.2303	-0.244
2019-01-20 01:00:00	0	0	0	7.06031	1017.45	66.9397	-0.233
2019-01-20 01:15:00	0	0	0	5.9193	1003.06	74.4065	-0.244
2019-01-20 01:30:00	0	0	0	6.09538	1039.9	68.6368	-0.244
2019-01-20 01:45:00	0	0	0	6.43822	1037.49	62.6938	-0.244
2019-01-20 02:00:00	0	0	0	6.87783	1038.11	67.9216	-0.244
2019-01-20 02:15:00	0	0	0	6.3814	1058.18	72.0778	-0.233
2019-01-20 02:30:00	0	0	0	6.15397	1021.28	71.686	-0.244
2019-01-20 02:45:00	0	0	0	5.83772	996.393	63.6733	-0.244
2019-01-20 03:00:00	0	0	0	5.73425	971.876	70.0708	-0.244
2019-01-20 03:15:00	0	0	0	6.194	1028.72	72.9528	-0.244
2019-01-20 03:30:00	0	0	0	6.04453	1051.2	59.7489	-0.244
2019-01-20 03:45:00	0	0	0	5.91859	994.429	64.5507	-0.244
2019-01-20 04:00:00	0	0	0	5.41868	1050.53	61.3018	-0.233
2019-01-20 04:15:00	0	0	0	6.81407	1057.49	64.5412	-0.244
2019-01-20 04:30:00	0	0	0	5.50866	1035.95	62.8207	-0.244
2019-01-20 04:45:00	0	0	0	5.99194	996.188	69.6243	-0.244
2019-01-20 05:00:00	0	0	0	6.28391	971.543	58.8561	-0.244
2019-01-20 05:15:00	0	0	0	5.77326	1066.46	61.8114	-0.244
2019-01-20 05:30:00	0	0	0	5.83403	976.226	59.3394	-0.233
2019-01-20 05:45:00	0	0	0	5.69024	1052.06	63.0524	-0.244
2019-01-20 06:00:00	0	0	0	5.89442	1025.37	62.9906	-0.244
2019-01-20 06:15:00	0	0	0	5.34833	1048.27	60.2829	-0.244
2019-01-20 06:30:00	0	0	0	5.36523	1060.6	67.1704	-0.244
2019-01-20 06:45:00	0	0	0	5.58361	1024.63	61.6947	-0.244
2019-01-20 07:00:00	0	0	0	6.09862	1003.8	63.6028	-0.244
2019-01-20 07:15:00	0	0	0	4.83602	1036.05	59.9287	-0.273
2019-01-20 07:30:00	1.4	0	0	5.84024	1020.34	61.8442	0.233
2019-01-20 07:45:00	10.333	0	0	5.58672	984.261	65.0599	1.84
2019-01-20 08:00:00	31.6	13.4089	2.00363	5.93936	1053.09	59.994	4.94
2019-01-20 08:15:00	68.267	25.654	3.83335	5.24228	991.672	56.4913	9.411
2019-01-20 08:30:00	106.867	37.7971	5.64785	5.50171	1029.99	66.4951	16.697
2019-01-20 08:45:00	163	53.6228	8.01261	5.34481	1012.65	54.5124	21.168
2019-01-20 09:00:00	206.4	55.5944	8.30721	5.0165	995.392	54.5153	23.067
2019-01-20 09:15:00	175.4	76.3771	11.4127	5.05326	1003.19	65.5695	22.542
2019-01-20 09:30:00	171.6	86.2552	12.8887	5.91132	996.109	59.4784	23.75
2019-01-20 09:45:00	251.333	83.4112	12.4637	4.9223	1066.99	54.5903	37.909
2019-01-20 10:00:00	354.667	85.224	12.7346	5.14199	1021.93	58.8297	48.037
2019-01-20 10:15:00	383.133	105.147	15.7116	5.36607	1038.56	60.249	52.744
2019-01-20 10:30:00	415.333	116.135	17.3536	5.6494	1027.83	58.6243	57.891
2019-01-20 10:45:00	446.533	123.684	18.4815	5.8266	986.622	51.2456	60.821
2019-01-20 11:00:00	468.267	125.148	18.7003	6.11626	1041.19	51.175	65.122
2019-01-20 11:15:00	494.067	114.637	17.1297	5.11665	1007.45	56.212	68.569
2019-01-20 11:30:00	521.4	124.581	18.6155	5.59182	987.891	58.9462	71.872
2019-01-20 11:45:00	540.8	126.979	18.9738	5.83732	1070.63	61.6858	74.924
2019-01-20 12:00:00	560	139.243	20.8064	5.98613	1045.96	52.3203	76.975
2019-01-20 12:15:00	559.667	144.848	21.644	5.40381	992.166	60.0031	79.04
2019-01-20 12:30:00	566.867	155.028	23.1651	5.39261	996.51	59.8773	78.689
2019-01-20 12:45:00	563.667	140.334	20.9694	5.04324	1040.4	58.2982	57.503
2019-01-20 13:00:00	279.067	136.983	20.4687	5.8658	1028.48	58.9633	24.452
2019-01-20 13:15:00	223.533	160.582	23.995	6.37857	979.461	55.253	26.315
2019-01-20 13:30:00	506.8	161.028	24.0616	6.50968	968.975	55.9186	76.483
2019-01-20 13:45:00	530.867	161.306	24.1033	6.25641	1061.6	53.7286	67.786
2019-01-20 14:00:00	376.533	153.342	22.9132	5.44102	978.539	52.5043	38.962
2019-01-20 14:15:00	361.667	152.759	22.826	6.081	1010.59	51.618	58.741
2019-01-20 14:30:00	453.867	150.47	22.484	6.05285	991.565	48.766	59.498
2019-01-20 14:45:00	456.4	147.294	22.0094	6.57883	1015.75	56.2686	35.833
2019-01-20 15:00:00	232.8	141.163	21.0934	6.44427	1004.11	46.2924	25.572
2019-01-20 15:15:00	191	118.256	17.6704	6.97183	1025.58	47.6176	16.874
2019-01-20 15:30:00	136.533	133.881	20.0053	6.32152	1019.61	51.8581	13.327
2019-01-20 15:45:00	108.867	109.922	16.4251	6.24412	1061.18	53.8468	10.915
2019-01-20 16:00:00	91.533	103.383	15.448	6.56411	994.169	47.4357	7.774
2019-01-20 16:15:00	54.867	84.286	12.5945	6.41094	1003.23	50.0058	4.005
2019-01-20 16:30:00	50.933	66.2804	9.90397	5.82992	995.156	45.7482	5.394
2019-01-20 16:45:00	42.667	48.5877	7.26023	6.34419	1000.01	46.6362	4.208
2019-01-20 17:00:00	33.067	29.6603	4.432	6.73709	1067.36	48.6332	2.121
2019-01-20 17:15:00	19.8	16.1241	2.40935	7.22593	1024.89	44.2505	0.89
2019-01-20 17:30:00	9.067	0	0	7.09039	1000.31	51.2193	-0.011
2019-01-20 17:45:00	1.267	0	0	6.42214	1048.08	44.6427	-0.273
2019-01-20 18:00:00	0	0	0	6.06677	1020.72	49.0044	-0.273
2019-01-20 18:15:00	0	0	0	6.75507	1054.59	51.479	-0.244
2019-01-20 18:30:00	0	0	0	6.38237	973.556	51.4837	-0.244
2019-01-20 18:45:00	0	0	0	5.99819	982.443	52.3214	-0.233
2019-01-20 19:00:00	0	0	0	7.11525	983.216	48.741	-0.244
2019-01-20 19:15:00	0	0	0	6.26195	1070.11	48.2532	-0.244
2019-01-20 19:30:00	0	0	0	6.04788	1022.42	44.7156	-0.244
2019-01-20 19:45:00	0	0	0	5.65896	1024.12	53.2986	-0.244
2019-01-20 20:00:00	0	0	0	5.50983	1050.14	51.5598	-0.244
2019-01-20 20:15:00	0	0	0	5.53352	995.729	47.9498	-0.244
2019-01-20 20:30:00	0	0	0	6.38408	1069.39	43.2471	-0.244
2019-01-20 20:45:00	0	0	0	5.54096	1040.97	43.7972	-0.244
2019-01-20 21:00:00	0	0	0	5.72792	1050.18	49.8194	-0.244
2019-01-20 21:15:00	0	0	0	5.55154	1015.31	51.2086	-0.244
2019-01-20 21:30:00	0	0	0	5.42568	997.091	48.8217	-0.244
2019-01-20 21:45:00	0	0	0	6.02564	1006.66	46.7343	-0.244
2019-01-20 22:00:00	0	0	0	5.67078	1022.95	49.6937	-0.244
2019-01-20 22:15:00	0	0	0	5.88874	971.011	47.6638	-0.244
2019-01-20 22:30:00	0	0	0	5.27	1025.1	53.7003	-0.244
2019-01-20 22:45:00	0	0	0	5.60197	1045.13	56.0134	-0.244
2019-01-20 23:00:00	0	0	0	4.96175	990.836	54.0419	-0.244
2019-01-20 23:15:00	0	0	0	4.79371	977.62	55.098	-0.244
2019-01-20 23:30:00	0	0	0	4.77498	1005.69	54.7427	-0.244
2019-01-20 23:45:00	0	0	0	5.57641	1055.74	52.4489	-0.244
2019-01-21 00:00:00	0	0	0	5.53777	1062.14	65.4719	-0.244
2019-01-21 00:15:00	0	0	0	4.10057	1004.91	81.8142	-0.244
2019-01-21 00:30:00	0	0	0	3.51911	1054.97	74.5235	-0.244
2019-01-21 00:45:00	0	0	0	3.77809	1065.75	85.8062	-0.233
2019-01-21 01:00:00	0	0	0	3.87442	998.285	71.0918	-0.244
2019-01-21 01:15:00	0	0	0	2.99907	1085.86	88.3842	-0.244
2019-01-21 01:30:00	0	0	0	2.8197	1088.05	89.058	-0.244
2019-01-21 01:45:00	0	0	0	2.84277	1069.11	89.3673	-0.244
2019-01-21 02:00:00	0	0	0	2.96519	1045.36	85.4174	-0.244
2019-01-21 02:15:00	0	0	0	2.76463	1041.3	79.6543	-0.244
2019-01-21 02:30:00	0	0	0	2.32366	1032.25	83.2513	-0.244
2019-01-21 02:45:00	0	0	0	2.42474	1027.65	79.949	-0.244
2019-01-21 03:00:00	0	0	0	1.9739	1045.74	91.3128	-0.244
2019-01-21 03:15:00	0	0	0	1.7454	1069.38	96.8867	-0.244
2019-01-21 03:30:00	0	0	0	1.83878	991.004	98.2044	-0.244
2019-01-21 03:45:00	0	0	0	1.7235	1033.01	93.696	-0.244
2019-01-21 04:00:00	0	0	0	1.3268	1014.43	86.0795	-0.244
2019-01-21 04:15:00	0	0	0	1.3467	1083.53	82.9198	-0.244
2019-01-21 04:30:00	0	0	0	1.24349	1072.2	83.1311	-0.244
2019-01-21 04:45:00	0	0	0	1.0878	996.514	86.1287	-0.244
2019-01-21 05:00:00	0	0	0	1.16471	1068.06	94.944	-0.244
2019-01-21 05:15:00	0	0	0	1.24766	1065.78	100	-0.244
2019-01-21 05:30:00	0	0	0	0.994174	1048.79	94.0176	-0.244
2019-01-21 05:45:00	0	0	0	1.22895	992.314	99.4113	-0.244
2019-01-21 06:00:00	0	0	0	1.14986	1022.46	100	-0.244
2019-01-21 06:15:00	0	0	0	1.06636	1034.17	98.3995	-0.244
2019-01-21 06:30:00	0	0	0	1.09951	1023.21	100	-0.244
2019-01-21 06:45:00	0	0	0	1.26706	999.294	93.8916	-0.244
2019-01-21 07:00:00	0	0	0	1.29063	1048.1	92.8189	-0.244
2019-01-21 07:15:00	0	0	0	1.39748	1007.03	84.0971	-0.244
2019-01-21 07:30:00	0.267	0	0	1.16181	988.9	95.7774	0
2019-01-21 07:45:00	11.733	19.7148	2.94589	1.45155	1003.95	87.1037	2.516
2019-01-21 08:00:00	40.133	47.6562	7.12103	1.53796	1033.97	92.3652	5.165
2019-01-21 08:15:00	72.933	85.2326	12.7359	1.35016	1069.52	100	10.523
2019-01-21 08:30:00	97.133	133.847	20.0001	1.87639	987.012	96.7061	16.313
2019-01-21 08:45:00	170	177.976	26.5942	1.89892	1018.21	94.1168	28.059
2019-01-21 09:00:00	213.2	208.292	31.1241	2.93532	1085.18	85.5135	27.323
2019-01-21 09:15:00	263.067	222.148	33.1945	2.81258	992.099	82.4776	40.946
2019-01-21 09:30:00	320.333	251.172	37.5314	3.83552	1061.26	79.848	49.356
2019-01-21 09:45:00	373.8	330.694	49.4141	4.18661	1073.68	81.1509	58.774
2019-01-21 10:00:00	437.467	336.828	50.3306	4.72023	1025.95	67.6256	62.938
2019-01-21 10:15:00	463	323.848	48.3911	5.48053	1019.37	69.92	69.193
2019-01-21 10:30:00	492.133	416.543	62.2421	6.69718	1046.33	69.1791	71.159
2019-01-21 10:45:00	508.2	393.943	58.8651	7.53644	987.475	62.3845	72.777
2019-01-21 11:00:00	531	421.667	63.0077	7.46033	1018.7	63.6767	75.611
2019-01-21 11:15:00	554.733	449.801	67.2116	8.14796	1069.68	54.1964	77.315
2019-01-21 11:30:00	573.2	432.785	64.669	8.22649	1034.88	55.1177	79.476
2019-01-21 11:45:00	580.467	540.045	80.6964	8.84179	1037.07	47.5754	80.647
2019-01-21 12:00:00	593.733	476.12	71.1443	7.8462	1030.27	48.8742	81.05
2019-01-21 12:15:00	595.533	517.424	77.3162	8.78841	1077.45	50.4464	80.995
2019-01-21 12:30:00	606.2	485.235	72.5064	9.74175	1019.5	48.1893	81.29
2019-01-21 12:45:00	615.867	548.91	82.0211	9.33865	991.782	45.5821	81.368
2019-01-21 13:00:00	610.133	504.14	75.3313	11.0654	1042.57	46.3261	82.188
2019-01-21 13:15:00	589.667	607.879	90.8325	11.3155	1014.71	38.5977	76.077
2019-01-21 13:30:00	576.8	589.014	88.0136	10.4963	1081.86	41.3133	77.865
2019-01-21 13:45:00	539.133	557.213	83.2618	11.4975	1044.9	35.0012	57.762
2019-01-21 14:00:00	502.467	538.934	80.5304	11.2739	988.608	36.2222	72.567
2019-01-21 14:15:00	518.133	484.012	72.3236	10.5061	992.162	38.7271	68.24
2019-01-21 14:30:00	495.867	376.818	56.3062	9.63086	1080.57	41.5892	65.077
2019-01-21 14:45:00	463.067	367.778	54.9553	12.0004	1010.16	38.4497	61.024
2019-01-21 15:00:00	433.133	300.999	44.9768	10.2849	1021.13	36.4215	56.531
2019-01-21 15:15:00	399.467	288.63	43.1286	10.0041	1000.61	38.8602	50.885
2019-01-21 15:30:00	350.467	206.573	30.8673	10.2919	1012	42.2174	44.131
2019-01-21 15:45:00	302.467	184.734	27.6039	11.3259	1035.27	41.4276	36.612
2019-01-21 16:00:00	252.067	152.399	22.7723	10.7659	998.861	45.5734	28.325
2019-01-21 16:15:00	199.4	134.196	20.0522	8.9603	1070.38	41.8686	20.178
2019-01-21 16:30:00	143.4	88.3472	13.2013	9.33993	1016.25	43.037	12.699
2019-01-21 16:45:00	107.4	61.8641	9.24405	9.42643	999.171	47.3405	8.934
2019-01-21 17:00:00	77.267	39.8213	5.9503	10.3706	1029.2	48.7537	5.856
2019-01-21 17:15:00	47.867	19.9652	2.98331	10.3269	1056.81	49.8494	3.207
2019-01-21 17:30:00	25.133	0	0	8.90733	984.158	47.2842	1.197
2019-01-21 17:45:00	7.333	0	0	9.59034	994.499	52.3065	-0.115
2019-01-21 18:00:00	0.067	0	0	8.17968	1045.29	61.2515	-0.273
2019-01-21 18:15:00	0	0	0	8.11529	1010.09	54.5131	-0.244
2019-01-21 18:30:00	0	0	0	6.70164	1060.02	60.8198	-0.244
2019-01-21 18:45:00	0	0	0	6.21657	1081.58	65.2918	-0.244
2019-01-21 19:00:00	0	0	0	5.74403	1049.03	62.5936	-0.244
2019-01-21 19:15:00	0	0	0	5.82008	1084.53	67.9519	-0.233
2019-01-21 19:30:00	0	0	0	5.147	991.782	68.5636	-0.033
[truncated: 68,177 more rows]
