# Supplementary material
Source: PeerJ journal article supplement (doi:10.7717/peerj-cs.3610)
Supplement: Solar_station_site_5_Nominal_capacity110MW.xlsx [file Solar_station_site_5_Nominal_capacity110MW.xlsx]

## Sheet: Sheet1
Time(year-month-day h:m:s)	Total solar irradiance (W/m2)	Direct normal irradiance (W/m2)	Global horizontal irradiance (W/m2)	Air temperature (°C)	Atmosphere (hpa)	Relative humidity (%)	Power (MW)
2019-01-01	0	0	0	0.6	1037.9	83.1	0
2019-01-01 00:15:00	0	0	0	0.5	1037.9	83.9	0
2019-01-01 00:30:00	0	0	0	0.5	1037.6	84.9	0
2019-01-01 00:45:00	0	0	0	0.5	1037.5	85.3	0
2019-01-01 01:00:00	0	0	0	0.3	1037.5	85.4	0
2019-01-01 01:15:00	0	0	0	0.4	1037.5	85.7	0
2019-01-01 01:30:00	0	0	0	0.4	1037.5	85.9	0
2019-01-01 01:45:00	0	0	0	0.3	1037.5	85.9	0
2019-01-01 02:00:00	0	0	0	0.3	1037.5	86	0
2019-01-01 02:15:00	0	0	0	0.3	1037.3	85.8	0
2019-01-01 02:30:00	0	0	0	0.4	1037.3	85.7	0
2019-01-01 02:45:00	0	0	0	0.4	1037.1	85.6	0
2019-01-01 03:00:00	0	0	0	0.4	1037	85.7	0
2019-01-01 03:15:00	0	0	0	0.5	1036.8	85.6	0
2019-01-01 03:30:00	0	0	0	0.5	1036.7	85	0
2019-01-01 03:45:00	0	0	0	0.6	1036.6	83.5	0
2019-01-01 04:00:00	0	0	0	0.5	1036.5	82	0
2019-01-01 04:15:00	0	0	0	0.6	1036.4	81.5	0
2019-01-01 04:30:00	0	0	0	0.6	1036.5	80.7	0
2019-01-01 04:45:00	0	0	0	0.6	1036.6	80.6	0
2019-01-01 05:00:00	0	0	0	0.5	1036.5	81.2	0
2019-01-01 05:15:00	0	0	0	0.6	1036.8	80.5	0
2019-01-01 05:30:00	0	0	0	0.7	1036.7	80.3	0
2019-01-01 05:45:00	0	0	0	0.7	1036.5	80.1	0
2019-01-01 06:00:00	0	0	0	0.7	1036.5	79.3	0
2019-01-01 06:15:00	0	0	0	0.7	1036.8	80	0
2019-01-01 06:30:00	0	0	0	0.6	1036.8	80.6	0
2019-01-01 06:45:00	0	0	0	0.6	1036.9	79.6	0
2019-01-01 07:00:00	0	0	0	0.7	1037	79.4	0
2019-01-01 07:15:00	0	0	0	0.7	1037	80.2	0
2019-01-01 07:30:00	1	0	1	0.6	1037.1	80.2	0
2019-01-01 07:45:00	6	0	5	0.6	1037.2	80.4	0.22
2019-01-01 08:00:00	13	0	10	0.7	1037.4	80.9	0.94
2019-01-01 08:15:00	23	0	17	0.7	1037.5	80.8	1.9
2019-01-01 08:30:00	35	0	26	0.8	1037.6	80.4	3.31
2019-01-01 08:45:00	49	0	37	0.9	1037.8	80.8	4.88
2019-01-01 09:00:00	66	0	49	1.1	1037.7	80.1	6.79
2019-01-01 09:15:00	88	0	65	1.2	1037.7	79.2	9.12
2019-01-01 09:30:00	84	0	63	1.5	1037.7	77.8	8.92
2019-01-01 09:45:00	110	0	81	1.7	1037.4	77.2	11.41
2019-01-01 10:00:00	140	0	103	1.7	1037.1	75.8	14.47
2019-01-01 10:15:00	157	0	114	1.9	1037	74.1	16.85
2019-01-01 10:30:00	176	0	128	2	1036.9	74	18.69
2019-01-01 10:45:00	179	0	131	2	1036.8	72.9	18.83
2019-01-01 11:00:00	179	0	132	2.1	1036.5	71.9	19.09
2019-01-01 11:15:00	166	0	123	2.3	1036.5	72	17.74
2019-01-01 11:30:00	153	0	112	2.4	1036.3	72.1	16.67
2019-01-01 11:45:00	148	0	109	2.5	1035.9	71.7	15.64
2019-01-01 12:00:00	221	0	156	2.6	1035.1	72	24.31
2019-01-01 12:15:00	209	0	155	2.7	1034.7	71	22.02
2019-01-01 12:30:00	218	0	161	2.7	1034.6	70.5	25.36
2019-01-01 12:45:00	211	0	145	2.8	1034.4	69.8	24.48
2019-01-01 13:00:00	248	0	172	2.9	1034.1	70.6	29.93
2019-01-01 13:15:00	690	0	537	3.4	1033.5	68.5	74.18
2019-01-01 13:30:00	657	0	510	4.7	1033.3	65.3	64.17
2019-01-01 13:45:00	655	0	501	4.1	1033	66	51.1
2019-01-01 14:00:00	597	0	463	4.5	1032.6	64.8	55.71
2019-01-01 14:15:00	554	0	426	4.5	1032.6	64	62.99
2019-01-01 14:30:00	513	0	391	4.6	1032.2	65.3	57.99
2019-01-01 14:45:00	486	0	365	4.5	1032.2	63	54.58
2019-01-01 15:00:00	435	0	320	4.9	1032.4	63.3	48.57
2019-01-01 15:15:00	107	0	78	4.9	1032.4	63	10.88
2019-01-01 15:30:00	422	0	289	5.4	1032.3	61.9	45.11
2019-01-01 15:45:00	192	0	136	5.2	1032.3	60.8	21.99
2019-01-01 16:00:00	100	0	69	4.2	1032.4	64.3	10.64
2019-01-01 16:15:00	163	0	113	4.5	1032.5	64.9	14.47
2019-01-01 16:30:00	51	0	38	4.6	1032.7	64.1	5.06
2019-01-01 16:45:00	38	0	28	4.5	1032.8	65.7	3.44
2019-01-01 17:00:00	17	0	12	4	1032.8	69	1.39
2019-01-01 17:15:00	6	0	5	3.6	1033.3	72.1	0.21
2019-01-01 17:30:00	0	0	0	3.3	1033.6	74.1	0
2019-01-01 17:45:00	0	0	0	3.2	1033.6	74.8	0
2019-01-01 18:00:00	0	0	0	3.2	1033.9	74.8	0
2019-01-01 18:15:00	0	0	0	3.1	1034	75.8	0
2019-01-01 18:30:00	0	0	0	3	1034.4	76.2	0
2019-01-01 18:45:00	0	0	0	3.1	1034.2	77	0
2019-01-01 19:00:00	0	0	0	2.9	1034.2	77	0
2019-01-01 19:15:00	0	0	0	3.1	1034.3	76	0
2019-01-01 19:30:00	0	0	0	3	1034.4	76	0
2019-01-01 19:45:00	0	0	0	2.8	1034.4	76.8	0
2019-01-01 20:00:00	0	0	0	2.7	1034.2	78.1	0
2019-01-01 20:15:00	0	0	0	2.9	1034.4	77.8	0
2019-01-01 20:30:00	0	0	0	2.9	1034.2	78	0
2019-01-01 20:45:00	0	0	0	2.5	1034.1	79.2	0
2019-01-01 21:00:00	0	0	0	2.5	1034.3	80.3	0
2019-01-01 21:15:00	0	0	0	2.6	1034.5	80.3	0
2019-01-01 21:30:00	0	0	0	2.5	1034.6	79.3	0
2019-01-01 21:45:00	0	0	0	2.3	1034.7	80.6	0
2019-01-01 22:00:00	0	0	0	2.2	1034.7	82	0
2019-01-01 22:15:00	0	0	0	2.3	1035	82.5	0
2019-01-01 22:30:00	0	0	0	2.2	1035	83.1	0
2019-01-01 22:45:00	0	0	0	2.1	1035.3	83.7	0
2019-01-01 23:00:00	0	0	0	2.1	1035.1	84	0
2019-01-01 23:15:00	0	0	0	2	1035.3	84.3	0
2019-01-01 23:30:00	0	0	0	1.9	1035.3	84.9	0
2019-01-01 23:45:00	0	0	0	1.9	1035.3	85	0
2019-01-02	0	0	0	1.8	1035.3	85.2	0
2019-01-02 00:15:00	0	0	0	1.7	1035.3	85.6	0
2019-01-02 00:30:00	0	0	0	1.7	1035.4	85.8	0
2019-01-02 00:45:00	0	0	0	1.7	1035.3	85.9	0
2019-01-02 01:00:00	0	0	0	1.7	1035.4	86.3	0
2019-01-02 01:15:00	0	0	0	1.5	1035.3	86.5	0
2019-01-02 01:30:00	0	0	0	1.6	1035.3	86.2	0
2019-01-02 01:45:00	0	0	0	1.6	1035.5	86	0
2019-01-02 02:00:00	0	0	0	1.6	1035.4	85.5	0
2019-01-02 02:15:00	0	0	0	1.6	1035.4	85.9	0
2019-01-02 02:30:00	0	0	0	1.7	1035.1	85.8	0
2019-01-02 02:45:00	0	0	0	1.6	1034.9	85.5	0
2019-01-02 03:00:00	0	0	0	1.5	1034.8	85.2	0
2019-01-02 03:15:00	0	0	0	1.5	1034.7	85.4	0
2019-01-02 03:30:00	0	0	0	1.4	1034.3	85.2	0
2019-01-02 03:45:00	0	0	0	1.4	1034.1	85.1	0
2019-01-02 04:00:00	0	0	0	1.5	1033.7	85.2	0
2019-01-02 04:15:00	0	0	0	1.4	1033.6	84.9	0
2019-01-02 04:30:00	0	0	0	1.4	1033.5	85	0
2019-01-02 04:45:00	0	0	0	1.4	1033.2	84.8	0
2019-01-02 05:00:00	0	0	0	1.4	1033	84.5	0
2019-01-02 05:15:00	0	0	0	1.4	1033.2	84.8	0
2019-01-02 05:30:00	0	0	0	1.5	1033	84.5	0
2019-01-02 05:45:00	0	0	0	1.6	1033	84.5	0
2019-01-02 06:00:00	0	0	0	1.5	1033	85.3	0
2019-01-02 06:15:00	0	0	0	1.5	1033	85	0
2019-01-02 06:30:00	0	0	0	1.5	1033.1	84.7	0
2019-01-02 06:45:00	0	0	0	1.6	1033.4	85	0
2019-01-02 07:00:00	0	0	0	1.5	1033.4	84.4	0
2019-01-02 07:15:00	0	0	0	1.5	1033.2	84.7	0
2019-01-02 07:30:00	0	0	0	1.4	1033.4	84.3	0
2019-01-02 07:45:00	5	0	4	1.4	1033.5	84.2	0.1
2019-01-02 08:00:00	12	0	9	1.5	1033.6	83.9	0.84
2019-01-02 08:15:00	22	0	16	1.6	1033.9	84.2	1.71
2019-01-02 08:30:00	32	0	24	1.7	1033.9	84	2.9
2019-01-02 08:45:00	42	0	31	1.8	1034	84.3	4.25
2019-01-02 09:00:00	55	0	39	2.1	1034.2	84.1	6.13
2019-01-02 09:15:00	61	0	45	2.3	1034.5	85.2	7.21
2019-01-02 09:30:00	76	0	56	2.4	1034.5	85.6	8.95
2019-01-02 09:45:00	90	0	66	2.6	1034.4	85.7	10.37
2019-01-02 10:00:00	110	0	81	2.9	1034.4	85.5	12.35
2019-01-02 10:15:00	126	0	91	3.1	1034.2	84.7	14.28
2019-01-02 10:30:00	141	0	104	3.1	1033.8	83.7	15.85
2019-01-02 10:45:00	154	0	113	3.4	1033.7	82.2	16.64
2019-01-02 11:00:00	158	0	118	3.3	1033.2	81.2	16.59
2019-01-02 11:15:00	178	0	131	3.4	1033.1	80.4	18.75
2019-01-02 11:30:00	170	0	127	3.7	1032.5	80.4	17.85
2019-01-02 11:45:00	184	0	135	3.7	1032.1	80.2	19.54
2019-01-02 12:00:00	186	0	137	3.8	1031.9	79.9	19.76
2019-01-02 12:15:00	190	0	142	4.2	1031.5	78.4	19.42
2019-01-02 12:30:00	198	0	145	4.1	1031.2	78.3	20.58
2019-01-02 12:45:00	225	0	161	4.5	1030.9	77.1	23.29
2019-01-02 13:00:00	197	0	144	4.5	1030.5	74	20.13
2019-01-02 13:15:00	185	0	135	4.7	1030.4	72.9	19.32
2019-01-02 13:30:00	139	0	104	4.5	1030.1	73.5	13.8
2019-01-02 13:45:00	147	0	107	4.6	1030.2	73.6	14.94
2019-01-02 14:00:00	154	0	111	4.7	1030	73.2	15.83
2019-01-02 14:15:00	129	0	93	4.8	1030	73.7	13.88
2019-01-02 14:30:00	121	0	87	4.9	1029.9	72.8	13.11
2019-01-02 14:45:00	98	0	71	4.9	1029.8	72	10.72
2019-01-02 15:00:00	92	0	67	5.1	1029.8	71.8	10.27
2019-01-02 15:15:00	84	0	60	4.8	1029.8	73.1	9.63
2019-01-02 15:30:00	63	0	47	5	1030	72.6	6.85
2019-01-02 15:45:00	56	0	41	4.9	1030.1	72.9	5.93
2019-01-02 16:00:00	46	0	35	5	1030.2	72.3	4.71
2019-01-02 16:15:00	40	0	30	5	1030.1	71.8	3.94
2019-01-02 16:30:00	25	0	19	5	1030	71.8	2.18
2019-01-02 16:45:00	15	0	12	4.8	1030	72.8	1.15
2019-01-02 17:00:00	8	0	7	4.7	1029.9	72.8	0.52
2019-01-02 17:15:00	1	0	1	4.6	1030.2	73.1	0
2019-01-02 17:30:00	0	0	0	4.6	1030.3	73.9	0
2019-01-02 17:45:00	0	0	0	4.6	1030.3	73.6	0
2019-01-02 18:00:00	0	0	0	4.6	1030.5	75.1	0
2019-01-02 18:15:00	0	0	0	4.5	1030.6	77	0
2019-01-02 18:30:00	0	0	0	4.7	1030.9	77.5	0
2019-01-02 18:45:00	0	0	0	4.6	1030.9	77.3	0
2019-01-02 19:00:00	0	0	0	4.5	1031	78.1	0
2019-01-02 19:15:00	0	0	0	4.4	1031.1	78.7	0
2019-01-02 19:30:00	0	0	0	4.4	1031.3	79.2	0
2019-01-02 19:45:00	0	0	0	3.9	1031.3	80.8	0
2019-01-02 20:00:00	0	0	0	3.9	1031.2	82	0
2019-01-02 20:15:00	0	0	0	3.8	1031.1	83.1	0
2019-01-02 20:30:00	0	0	0	4.2	1031.3	82	0
2019-01-02 20:45:00	0	0	0	4.1	1031.3	82.3	0
2019-01-02 21:00:00	0	0	0	4.1	1031.4	82.3	0
2019-01-02 21:15:00	0	0	0	4	1031.4	82.3	0
2019-01-02 21:30:00	0	0	0	4	1031.3	82.7	0
2019-01-02 21:45:00	0	0	0	3.9	1031.3	82.8	0
2019-01-02 22:00:00	0	0	0	4.1	1031.4	82.9	0
2019-01-02 22:15:00	0	0	0	3.8	1031.4	83.5	0
2019-01-02 22:30:00	0	0	0	3.5	1031.2	84.3	0
2019-01-02 22:45:00	0	0	0	3.5	1031.2	84.4	0
2019-01-02 23:00:00	0	0	0	3.6	1031.3	84.5	0
2019-01-02 23:15:00	0	0	0	3.4	1031.4	85.3	0
2019-01-02 23:30:00	0	0	0	3.4	1031.5	85.6	0
2019-01-02 23:45:00	0	0	0	3.5	1031.5	85.6	0
2019-01-03	0	0	0	3.5	1031.4	85.3	0
2019-01-03 00:15:00	0	0	0	3.7	1031.5	85.2	0
2019-01-03 00:30:00	0	0	0	3.6	1031.5	85.1	0
2019-01-03 00:45:00	0	0	0	3.4	1031.5	85.1	0
2019-01-03 01:00:00	0	0	0	3.4	1031.5	85.2	0
2019-01-03 01:15:00	0	0	0	3.4	1031.3	85.5	0
2019-01-03 01:30:00	0	0	0	3.4	1031.5	86.1	0
2019-01-03 01:45:00	0	0	0	3.4	1031.3	86.1	0
2019-01-03 02:00:00	0	0	0	3.2	1031.3	86.4	0
2019-01-03 02:15:00	0	0	0	3.2	1031.2	86.1	0
2019-01-03 02:30:00	0	0	0	3.2	1031	86.2	0
2019-01-03 02:45:00	0	0	0	3.2	1030.8	86.5	0
2019-01-03 03:00:00	0	0	0	3.2	1030.7	86.1	0
2019-01-03 03:15:00	0	0	0	3.2	1030.5	86	0
2019-01-03 03:30:00	0	0	0	3.2	1030.4	86.2	0
2019-01-03 03:45:00	0	0	0	3.2	1030.4	86	0
2019-01-03 04:00:00	0	0	0	3.1	1030.3	85.7	0
2019-01-03 04:15:00	0	0	0	3.1	1030.2	85.9	0
2019-01-03 04:30:00	0	0	0	3	1030.2	86	0
2019-01-03 04:45:00	0	0	0	3.2	1030.1	85.9	0
2019-01-03 05:00:00	0	0	0	2.9	1030.1	85.8	0
2019-01-03 05:15:00	0	0	0	3	1029.9	85.7	0
2019-01-03 05:30:00	0	0	0	3	1030	85.7	0
2019-01-03 05:45:00	0	0	0	3.1	1030	86.2	0
2019-01-03 06:00:00	0	0	0	3.1	1030	85.8	0
2019-01-03 06:15:00	0	0	0	3	1029.9	86	0
2019-01-03 06:30:00	0	0	0	3	1030	85.9	0
2019-01-03 06:45:00	0	0	0	3	1030	85.9	0
2019-01-03 07:00:00	0	0	0	2.8	1030.1	85.8	0
2019-01-03 07:15:00	0	0	0	3	1030.3	85.7	0
2019-01-03 07:30:00	3	0	2	2.8	1030.4	85.7	0
2019-01-03 07:45:00	11	0	8	3	1030.7	85.5	0.7
2019-01-03 08:00:00	23	0	17	3.1	1030.7	85.6	1.75
2019-01-03 08:15:00	35	0	26	3.4	1030.8	85.5	3.08
2019-01-03 08:30:00	48	0	35	3.4	1030.9	85.6	4.47
2019-01-03 08:45:00	66	0	49	3.6	1031	85.7	6.53
2019-01-03 09:00:00	88	0	64	3.7	1031	86	8.8
2019-01-03 09:15:00	103	0	76	4	1031.4	85.6	10.45
2019-01-03 09:30:00	133	0	96	4.3	1031.2	84.1	13.8
2019-01-03 09:45:00	156	0	112	4.5	1031.3	83.2	16.38
2019-01-03 10:00:00	183	0	131	4.6	1031	82.2	19.17
2019-01-03 10:15:00	217	0	153	5	1030.8	80.8	23.05
2019-01-03 10:30:00	250	0	176	5	1030.5	80.2	26.34
2019-01-03 10:45:00	275	0	192	5.5	1030.5	78.4	28.72
2019-01-03 11:00:00	297	0	205	5.7	1030	77.3	31.32
2019-01-03 11:15:00	340	0	233	5.9	1029.7	75.1	35.62
2019-01-03 11:30:00	362	0	250	6.2	1029.5	74.6	38.16
2019-01-03 11:45:00	390	0	266	6.3	1029.1	74.1	42.32
2019-01-03 12:00:00	556	0	389	7	1028.4	71.5	58.65
2019-01-03 12:15:00	493	0	351	7.1	1027.9	70.3	48.16
2019-01-03 12:30:00	437	0	299	7.8	1027.7	68.9	46.3
2019-01-03 12:45:00	584	0	420	7.7	1027.2	67.6	64.9
2019-01-03 13:00:00	568	0	403	7.7	1026.8	67	69.84
2019-01-03 13:15:00	468	0	335	7.9	1026.4	66	51.67
2019-01-03 13:30:00	428	0	298	8.7	1026.1	64.1	45.99
2019-01-03 13:45:00	411	0	286	8.8	1025.9	62.4	44.53
2019-01-03 14:00:00	550	0	403	8.6	1025.5	63.9	55.35
2019-01-03 14:15:00	411	0	307	8.7	1025.3	63.9	49.84
2019-01-03 14:30:00	494	0	371	9.4	1025	63.5	55.05
2019-01-03 14:45:00	462	0	344	9.1	1025.1	62.5	51.35
2019-01-03 15:00:00	426	0	310	9.8	1024.9	60.5	45.03
2019-01-03 15:15:00	392	0	278	9.8	1024.9	60.9	41.21
2019-01-03 15:30:00	192	0	133	9.4	1025	61.7	19.12
2019-01-03 15:45:00	110	0	80	9.2	1025.3	63.2	11.45
2019-01-03 16:00:00	68	0	50	9.2	1025.6	63.7	6.57
2019-01-03 16:15:00	42	0	32	8.9	1026	65.2	3.83
2019-01-03 16:30:00	8	0	6	8.9	1026	66.4	0.29
2019-01-03 16:45:00	10	0	7	8.9	1025.9	67.6	0.78
2019-01-03 17:00:00	7	0	5	8.6	1025.7	69.3	0.4
2019-01-03 17:15:00	0	0	1	8.3	1025.9	71.3	0
2019-01-03 17:30:00	0	0	0	7.9	1025.8	73.9	0
2019-01-03 17:45:00	0	0	0	7.7	1026	75.2	0
2019-01-03 18:00:00	0	0	0	7.6	1025.9	75.6	0
2019-01-03 18:15:00	0	0	0	7.6	1026.2	76.3	0
2019-01-03 18:30:00	0	0	0	7.5	1026.3	76.4	0
2019-01-03 18:45:00	0	0	0	7.4	1026.1	77.2	0
2019-01-03 19:00:00	0	0	0	7.3	1026.1	78.3	0
2019-01-03 19:15:00	0	0	0	7.2	1026	78.3	0
2019-01-03 19:30:00	0	0	0	7.3	1025.9	78.7	0
2019-01-03 19:45:00	0	0	0	7.2	1025.8	79.6	0
2019-01-03 20:00:00	0	0	0	7.2	1025.3	79.9	0
2019-01-03 20:15:00	0	0	0	6.9	1026.4	82.4	0
2019-01-03 20:30:00	0	0	0	6.6	1026.1	83.6	0
2019-01-03 20:45:00	0	0	0	6.4	1026.4	84.7	0
2019-01-03 21:00:00	0	0	0	6.3	1026	85.1	0
2019-01-03 21:15:00	0	0	0	6.1	1026.3	85.2	0
2019-01-03 21:30:00	0	0	0	5.8	1026.3	84.9	0
2019-01-03 21:45:00	0	0	0	6	1027.1	84.6	0
2019-01-03 22:00:00	0	0	0	5.8	1026.6	84.5	0
2019-01-03 22:15:00	0	0	0	5.7	1026.4	84.1	0
2019-01-03 22:30:00	0	0	0	5.7	1026	83.6	0
2019-01-03 22:45:00	0	0	0	5.6	1026.3	83.1	0
2019-01-03 23:00:00	0	0	0	5.5	1026.4	82.8	0
2019-01-03 23:15:00	0	0	0	5.5	1026.2	82.2	0
2019-01-03 23:30:00	0	0	0	5.6	1025.8	81.8	0
2019-01-03 23:45:00	0	0	0	5.6	1026	81.5	0
2019-01-04	0	0	0	5.6	1025.8	80.8	0
2019-01-04 00:15:00	0	0	0	5.4	1025.8	80.7	0
2019-01-04 00:30:00	0	0	0	5.3	1025.9	80.1	0
2019-01-04 00:45:00	0	0	0	5.3	1026.1	80	0
2019-01-04 01:00:00	0	0	0	5.4	1026.2	79.6	0
2019-01-04 01:15:00	0	0	0	5.3	1026.5	79.7	0
2019-01-04 01:30:00	0	0	0	5.2	1025.7	80.2	0
2019-01-04 01:45:00	0	0	0	5.4	1026.6	79.6	0
2019-01-04 02:00:00	0	0	0	5.2	1027.3	79.1	0
2019-01-04 02:15:00	0	0	0	5.1	1026.7	79.1	0
2019-01-04 02:30:00	0	0	0	4.9	1026.5	78.9	0
2019-01-04 02:45:00	0	0	0	4.6	1026.3	79	0
2019-01-04 03:00:00	0	0	0	4.5	1026.4	79.3	0
2019-01-04 03:15:00	0	0	0	4.5	1026.9	79.1	0
2019-01-04 03:30:00	0	0	0	4.4	1026.5	79.2	0
2019-01-04 03:45:00	0	0	0	4.4	1026.4	79.5	0
2019-01-04 04:00:00	0	0	0	4.3	1025.7	78.9	0
2019-01-04 04:15:00	0	0	0	4.3	1025.5	79	0
2019-01-04 04:30:00	0	0	0	4.2	1025.6	78.6	0
2019-01-04 04:45:00	0	0	0	4.4	1025	78.5	0
2019-01-04 05:00:00	0	0	0	4.3	1025.5	78.3	0
2019-01-04 05:15:00	0	0	0	4.5	1025.4	78.1	0
2019-01-04 05:30:00	0	0	0	4.5	1025.6	77.9	0
2019-01-04 05:45:00	0	0	0	4.6	1025.9	78	0
2019-01-04 06:00:00	0	0	0	4.5	1025.6	78.5	0
2019-01-04 06:15:00	0	0	0	4.7	1026.2	78.5	0
2019-01-04 06:30:00	0	0	0	4.7	1026	79	0
2019-01-04 06:45:00	0	0	0	4.5	1025.8	79.5	0
2019-01-04 07:00:00	0	0	0	4.4	1026	80.1	0
2019-01-04 07:15:00	0	0	0	4.4	1026.2	80	0
2019-01-04 07:30:00	2	0	2	4.4	1026	80.6	0
2019-01-04 07:45:00	10	0	7	4.6	1026.3	80.5	0.63
2019-01-04 08:00:00	23	0	17	4.6	1026.2	81.4	1.81
2019-01-04 08:15:00	19	0	14	4.7	1027.2	81.7	1.49
2019-01-04 08:30:00	52	0	37	4.9	1026.8	82.3	5.27
2019-01-04 08:45:00	53	0	40	5	1026.9	82.6	5.17
2019-01-04 09:00:00	41	0	30	5	1027.5	83.3	3.96
2019-01-04 09:15:00	59	0	43	5.2	1027.4	83.6	5.89
2019-01-04 09:30:00	87	0	65	5.2	1027.4	84.2	8.9
2019-01-04 09:45:00	84	0	64	5.5	1028.1	84.5	7.52
2019-01-04 10:00:00	41	0	31	5.6	1028.1	85.1	3.63
2019-01-04 10:15:00	62	0	46	5.6	1027.9	85.4	6.28
2019-01-04 10:30:00	98	0	74	5.8	1028	85.4	9.49
2019-01-04 10:45:00	79	0	60	5.9	1027.9	85.5	7.64
2019-01-04 11:00:00	122	0	90	6	1027.6	85.5	13.36
2019-01-04 11:15:00	152	0	112	6.2	1027.3	85.6	16.21
2019-01-04 11:30:00	166	0	123	6.3	1026.8	85.5	16.05
2019-01-04 11:45:00	103	0	76	6.4	1026.8	85.5	9.71
2019-01-04 12:00:00	93	0	69	6.5	1026.5	85.6	8.79
2019-01-04 12:15:00	136	0	101	6.5	1026	85.1	12.81
2019-01-04 12:30:00	107	0	79	6.7	1025.4	85.1	10.48
2019-01-04 12:45:00	83	0	61	7	1025.1	83.7	8.93
2019-01-04 13:00:00	104	0	77	6.9	1024.8	83.3	11.89
2019-01-04 13:15:00	81	0	60	6.7	1025	82.4	8.13
2019-01-04 13:30:00	63	0	47	6.6	1025	83.4	6.86
2019-01-04 13:45:00	87	0	65	6.6	1025.1	83.1	9.06
2019-01-04 14:00:00	73	0	54	6.5	1025	83	7.03
2019-01-04 14:15:00	65	0	49	6.4	1024.7	83.7	6.83
2019-01-04 14:30:00	52	0	39	6.3	1024.8	85.1	5.16
2019-01-04 14:45:00	50	0	36	6.3	1024.8	84.4	4.67
2019-01-04 15:00:00	29	0	21	6.3	1024.7	84.5	3.05
2019-01-04 15:15:00	26	0	20	6	1024.9	85.7	2.28
2019-01-04 15:30:00	18	0	14	5.9	1025	85.9	1.41
2019-01-04 15:45:00	13	0	10	5.7	1024.9	86.1	0.96
2019-01-04 16:00:00	11	0	8	5.5	1024.8	86.2	0.92
2019-01-04 16:15:00	13	0	10	5.4	1024.9	85.9	1.18
2019-01-04 16:30:00	10	0	7	5.4	1025.1	86	0.6
2019-01-04 16:45:00	4	0	3	5.2	1025.3	86.4	0.02
2019-01-04 17:00:00	2	0	2	5.3	1025.3	85.9	0
2019-01-04 17:15:00	0	0	1	5.2	1025.4	86.5	0
2019-01-04 17:30:00	0	0	0	5.2	1025.6	85.9	0
2019-01-04 17:45:00	0	0	0	5	1025.9	86.1	0
2019-01-04 18:00:00	0	0	0	5.1	1026	86.1	0
2019-01-04 18:15:00	0	0	0	5	1026	86.3	0
2019-01-04 18:30:00	0	0	0	5	1026.3	86.1	0
2019-01-04 18:45:00	0	0	0	5	1026.5	86.3	0
2019-01-04 19:00:00	0	0	0	5.1	1026.6	86	0
2019-01-04 19:15:00	0	0	0	5	1026.7	85.7	0
2019-01-04 19:30:00	0	0	0	5	1026.8	86.2	0
2019-01-04 19:45:00	0	0	0	4.8	1026.8	86.1	0
2019-01-04 20:00:00	0	0	0	4.7	1026.9	86	0
2019-01-04 20:15:00	0	0	0	4.4	1026.8	86.3	0
2019-01-04 20:30:00	0	0	0	4.2	1027	86.1	0
2019-01-04 20:45:00	0	0	0	4.3	1027	86	0
2019-01-04 21:00:00	0	0	0	4.3	1027.1	86.1	0
2019-01-04 21:15:00	0	0	0	4.3	1027.2	85.9	0
2019-01-04 21:30:00	0	0	0	4.4	1027.1	85.6	0
2019-01-04 21:45:00	0	0	0	4.4	1027.3	85.1	0
2019-01-04 22:00:00	0	0	0	4.3	1027.2	84.9	0
2019-01-04 22:15:00	0	0	0	4.3	1027.1	85.5	0
2019-01-04 22:30:00	0	0	0	4.3	1027	85.5	0
2019-01-04 22:45:00	0	0	0	4.2	1026.9	85.5	0
2019-01-04 23:00:00	0	0	0	4.2	1027	85.3	0
2019-01-04 23:15:00	0	0	0	4.2	1026.9	85.4	0
2019-01-04 23:30:00	0	0	0	4.1	1026.8	85.2	0
2019-01-04 23:45:00	0	0	0	4.1	1026.6	85.5	0
2019-01-05	0	0	0	4.1	1026.7	85.4	0
2019-01-05 00:15:00	0	0	0	4.2	1026.7	85.4	0
2019-01-05 00:30:00	0	0	0	4.1	1026.7	85.3	0
2019-01-05 00:45:00	0	0	0	4.1	1026.7	85.2	0
2019-01-05 01:00:00	0	0	0	4.1	1026.6	85.3	0
2019-01-05 01:15:00	0	0	0	4.1	1027	85.3	0
2019-01-05 01:30:00	0	0	0	4.1	1027	85.7	0
2019-01-05 01:45:00	0	0	0	3.9	1027	85.3	0
2019-01-05 02:00:00	0	0	0	4.1	1027.1	85.4	0
2019-01-05 02:15:00	0	0	0	3.9	1026.8	85.1	0
2019-01-05 02:30:00	0	0	0	3.8	1026.7	85.5	0
2019-01-05 02:45:00	0	0	0	3.8	1026.6	85.5	0
2019-01-05 03:00:00	0	0	0	3.7	1026.5	85.4	0
2019-01-05 03:15:00	0	0	0	3.9	1026.5	85.7	0
2019-01-05 03:30:00	0	0	0	3.7	1026.5	85.6	0
2019-01-05 03:45:00	0	0	0	3.7	1026	85.7	0
2019-01-05 04:00:00	0	0	0	3.6	1025.7	85.7	0
2019-01-05 04:15:00	0	0	0	3.6	1025.9	85.8	0
2019-01-05 04:30:00	0	0	0	3.7	1025.5	85.5	0
2019-01-05 04:45:00	0	0	0	3.7	1025.6	85.5	0
2019-01-05 05:00:00	0	0	0	3.7	1025.7	85.3	0
2019-01-05 05:15:00	0	0	0	3.6	1025.6	85.4	0
2019-01-05 05:30:00	0	0	0	3.6	1025.5	85.6	0
2019-01-05 05:45:00	0	0	0	3.6	1025.6	85.4	0
2019-01-05 06:00:00	0	0	0	3.6	1025.7	85.4	0
2019-01-05 06:15:00	0	0	0	3.5	1026	85.5	0
2019-01-05 06:30:00	0	0	0	3.6	1025.9	85.4	0
2019-01-05 06:45:00	0	0	0	3.5	1025.8	85.1	0
2019-01-05 07:00:00	0	0	0	3.5	1026.1	85.2	0
2019-01-05 07:15:00	0	0	0	3.4	1026.2	85.3	0
2019-01-05 07:30:00	7	0	5	3.4	1026.3	85.6	0.25
2019-01-05 07:45:00	30	0	22	3.4	1026.3	85.7	2.59
2019-01-05 08:00:00	42	0	31	3.6	1026.7	85.6	3.65
2019-01-05 08:15:00	87	0	62	3.6	1026.6	85.1	8.81
2019-01-05 08:30:00	98	0	69	3.8	1026.6	85.1	9.95
2019-01-05 08:45:00	136	0	98	3.9	1026.3	85	12.7
2019-01-05 09:00:00	92	0	68	4	1026.5	84.1	9.16
2019-01-05 09:15:00	78	0	57	4.2	1026.7	83.9	7.82
2019-01-05 09:30:00	137	0	100	4.3	1026.6	83.7	12.95
2019-01-05 09:45:00	130	0	96	4.5	1026.9	82.7	11.86
2019-01-05 10:00:00	88	0	65	4.6	1027.1	82.8	7.92
2019-01-05 10:15:00	65	0	47	4.6	1027.2	82.4	6.89
2019-01-05 10:30:00	73	0	53	4.7	1026.9	82.4	7.5
2019-01-05 10:45:00	81	0	60	4.7	1026.9	81.3	8.05
2019-01-05 11:00:00	77	0	57	4.8	1026.8	80.9	7.77
2019-01-05 11:15:00	95	0	70	4.7	1026.7	80.7	8.96
2019-01-05 11:30:00	79	0	59	4.8	1026.8	80.4	7.63
2019-01-05 11:45:00	66	0	49	4.9	1026.6	80	7.3
2019-01-05 12:00:00	66	0	49	4.9	1026.2	80.7	6.73
2019-01-05 12:15:00	64	0	48	4.7	1026.2	80.8	6.9
2019-01-05 12:30:00	51	0	38	4.7	1026	81.1	5.14
2019-01-05 12:45:00	51	0	38	4.6	1026.1	81.9	5.36
2019-01-05 13:00:00	58	0	43	4.6	1026	82.1	6.21
2019-01-05 13:15:00	69	0	51	4.5	1025.9	82	7.14
2019-01-05 13:30:00	69	0	52	4.5	1025.7	82.2	7.03
2019-01-05 13:45:00	93	0	68	4.5	1025.5	82.9	9.74
2019-01-05 14:00:00	71	0	52	4.3	1025.6	83.1	7.28
2019-01-05 14:15:00	53	0	40	4.4	1025.7	83	5.51
2019-01-05 14:30:00	35	0	26	4.4	1025.7	82.9	3.43
2019-01-05 14:45:00	35	0	26	4.4	1025.7	83.4	3.35
2019-01-05 15:00:00	31	0	23	4.4	1025.8	83.6	3.04
2019-01-05 15:15:00	23	0	18	4.4	1026	83.8	1.85
2019-01-05 15:30:00	15	0	11	4.3	1026	83.8	1.31
2019-01-05 15:45:00	11	0	8	4.2	1026	83.8	0.84
2019-01-05 16:00:00	10	0	8	4.2	1026.1	84.2	0.65
2019-01-05 16:15:00	7	0	6	4	1026.3	84.2	0.36
2019-01-05 16:30:00	9	0	7	4	1026.1	84.2	0.53
2019-01-05 16:45:00	5	0	4	3.9	1026.3	84.1	0.18
2019-01-05 17:00:00	3	0	2	3.9	1026.3	84	0
2019-01-05 17:15:00	1	0	1	4	1026.3	84.3	0
2019-01-05 17:30:00	0	0	0	3.9	1026.1	84.1	0
2019-01-05 17:45:00	0	0	0	4	1026.5	84.2	0
2019-01-05 18:00:00	0	0	0	4	1026.5	84.7	0
2019-01-05 18:15:00	0	0	0	4	1026.9	84.5	0
2019-01-05 18:30:00	0	0	0	4	1027.2	84.5	0
2019-01-05 18:45:00	0	0	0	4	1027.1	84.8	0
2019-01-05 19:00:00	0	0	0	3.8	1027.3	84.9	0
2019-01-05 19:15:00	0	0	0	3.9	1027.5	84.8	0
2019-01-05 19:30:00	0	0	0	3.9	1027.4	84.9	0
2019-01-05 19:45:00	0	0	0	3.9	1027.3	85.1	0
2019-01-05 20:00:00	0	0	0	3.9	1027.2	85.2	0
2019-01-05 20:15:00	0	0	0	3.9	1027.2	85	0
2019-01-05 20:30:00	0	0	0	3.8	1027.2	84.9	0
2019-01-05 20:45:00	0	0	0	3.8	1027.7	85.4	0
2019-01-05 21:00:00	0	0	0	3.8	1027.7	85.1	0
2019-01-05 21:15:00	0	0	0	3.7	1027.5	85.2	0
2019-01-05 21:30:00	0	0	0	3.7	1027.6	85.3	0
2019-01-05 21:45:00	0	0	0	3.6	1027.7	85.2	0
2019-01-05 22:00:00	0	0	0	3.7	1028	85.5	0
2019-01-05 22:15:00	0	0	0	3.5	1028.1	85.4	0
2019-01-05 22:30:00	0	0	0	3.4	1027.9	85.4	0
2019-01-05 22:45:00	0	0	0	3.3	1028.3	85.6	0
2019-01-05 23:00:00	0	0	0	3.3	1028.6	85.7	0
2019-01-05 23:15:00	0	0	0	3.2	1028.8	85.8	0
2019-01-05 23:30:00	0	0	0	3.3	1028.6	85.6	0
2019-01-05 23:45:00	0	0	0	3.2	1028.6	85.5	0
2019-01-06	0	0	0	3	1028.1	85.2	0
2019-01-06 00:15:00	0	0	0	2.9	1028.3	85.6	0
2019-01-06 00:30:00	0	0	0	3	1028.3	85.6	0
2019-01-06 00:45:00	0	0	0	3	1028.6	85.3	0
2019-01-06 01:00:00	0	0	0	3	1028.4	85.5	0
2019-01-06 01:15:00	0	0	0	3.1	1028.5	85.6	0
2019-01-06 01:30:00	0	0	0	3	1028.4	85.5	0
2019-01-06 01:45:00	0	0	0	3.1	1028.7	85.7	0
2019-01-06 02:00:00	0	0	0	3.2	1028.8	85.4	0
2019-01-06 02:15:00	0	0	0	3.2	1028.7	85.2	0
2019-01-06 02:30:00	0	0	0	3.2	1029	85.3	0
2019-01-06 02:45:00	0	0	0	3.2	1029	85.1	0
2019-01-06 03:00:00	0	0	0	3.1	1029.1	84.8	0
2019-01-06 03:15:00	0	0	0	3.2	1029.1	84.7	0
2019-01-06 03:30:00	0	0	0	3.1	1029.1	85.3	0
2019-01-06 03:45:00	0	0	0	3.2	1029.6	84.7	0
2019-01-06 04:00:00	0	0	0	3.2	1029.4	84.9	0
2019-01-06 04:15:00	0	0	0	3.1	1029.1	84.7	0
2019-01-06 04:30:00	0	0	0	3	1028.8	85.1	0
2019-01-06 04:45:00	0	0	0	3	1028.3	85	0
2019-01-06 05:00:00	0	0	0	3	1028.2	85.2	0
2019-01-06 05:15:00	0	0	0	2.8	1028	85.3	0
2019-01-06 05:30:00	0	0	0	2.8	1027.7	85.8	0
2019-01-06 05:45:00	0	0	0	2.8	1027.7	86	0
2019-01-06 06:00:00	0	0	0	2.7	1027.8	86.1	0
2019-01-06 06:15:00	0	0	0	2.7	1027.3	86.4	0
2019-01-06 06:30:00	0	0	0	2.4	1026.9	86.6	0
2019-01-06 06:45:00	0	0	0	2.2	1027	86.4	0
2019-01-06 07:00:00	0	0	0	2.1	1026.8	86.5	0
2019-01-06 07:15:00	0	0	0	1.9	1026.9	86.7	0
2019-01-06 07:30:00	6	0	5	1.8	1027.1	87.2	0.38
2019-01-06 07:45:00	42	0	30	1.9	1026.8	87.5	3.97
2019-01-06 08:00:00	70	0	48	2.1	1026.7	86.8	6.34
2019-01-06 08:15:00	118	0	80	2.4	1026.7	86.8	10.85
2019-01-06 08:30:00	137	0	93	2.9	1026.9	86.4	13.43
2019-01-06 08:45:00	134	0	94	3.4	1027.3	85.2	13.56
2019-01-06 09:00:00	205	0	137	3.8	1027.5	84.1	21.76
2019-01-06 09:15:00	164	0	111	3.9	1027.6	83.4	15.89
2019-01-06 09:30:00	276	0	183	4	1027.9	82.4	28.18
2019-01-06 09:45:00	333	0	224	4.4	1027.5	81.1	32.31
2019-01-06 10:00:00	442	0	297	4.6	1027.4	80.1	45.29
2019-01-06 10:15:00	338	0	227	5.2	1027.4	78.2	38.72
2019-01-06 10:30:00	320	0	218	5.1	1027.2	77.2	36.37
2019-01-06 10:45:00	323	0	219	5.2	1026.9	77.7	38.11
2019-01-06 11:00:00	344	0	233	5.6	1026.8	77.8	37.2
2019-01-06 11:15:00	249	0	178	5.5	1026.5	77.9	24.91
2019-01-06 11:30:00	185	0	132	5.8	1026.2	77.5	26.28
2019-01-06 11:45:00	314	0	222	5.8	1026	77.6	33.79
2019-01-06 12:00:00	246	0	171	6.2	1026.1	76.8	27.98
2019-01-06 12:15:00	214	0	155	6.2	1026	76.3	22.74
2019-01-06 12:30:00	196	0	142	6.5	1025.6	76.3	20.64
2019-01-06 12:45:00	134	0	97	6.3	1025.6	77.6	12.85
2019-01-06 13:00:00	229	0	167	6.5	1025.4	77.8	22.6
2019-01-06 13:15:00	189	0	143	6.6	1025.4	77.3	19.34
2019-01-06 13:30:00	187	0	135	6.4	1025.3	77.8	17.06
2019-01-06 13:45:00	169	0	124	6.7	1025.1	77.4	16.23
2019-01-06 14:00:00	142	0	106	6.6	1025	77.7	11.61
2019-01-06 14:15:00	70	0	52	6.5	1024.7	78.8	7.08
2019-01-06 14:30:00	66	0	48	6.3	1024.8	79.9	6.91
2019-01-06 14:45:00	48	0	35	6.3	1024.7	80.4	5.22
2019-01-06 15:00:00	117	0	86	6.4	1024.3	80.3	11.58
2019-01-06 15:15:00	140	0	103	6.6	1024.2	79.7	13.71
2019-01-06 15:30:00	105	0	73	6.7	1024	78.3	11.09
2019-01-06 15:45:00	212	0	147	6.8	1023.8	77.8	20.82
2019-01-06 16:00:00	217	0	150	6.9	1023.7	76.6	17.12
2019-01-06 16:15:00	58	0	42	7.1	1023.6	73.8	6.45
2019-01-06 16:30:00	81	0	58	6.8	1023.7	73.5	8.95
2019-01-06 16:45:00	62	0	45	6.8	1023.5	72.9	6.34
2019-01-06 17:00:00	21	0	16	6.7	1023.6	74.1	2.03
2019-01-06 17:15:00	6	0	5	6.8	1023.7	74.4	0.33
2019-01-06 17:30:00	0	0	0	6.6	1023.5	73.9	0
2019-01-06 17:45:00	0	0	0	6.6	1023.6	74.6	0
2019-01-06 18:00:00	0	0	0	6.1	1023.5	76.6	0
2019-01-06 18:15:00	0	0	0	5.7	1023.7	77.5	0
2019-01-06 18:30:00	0	0	0	5.7	1023.8	78.6	0
2019-01-06 18:45:00	0	0	0	5.8	1023.8	79	0
2019-01-06 19:00:00	0	0	0	5.6	1024.2	80.9	0
2019-01-06 19:15:00	0	0	0	4.8	1024.3	85.6	0
2019-01-06 19:30:00	0	0	0	5.5	1024.5	85	0
2019-01-06 19:45:00	0	0	0	5.7	1024.7	84.7	0
2019-01-06 20:00:00	0	0	0	5.6	1024.8	84.1	0
2019-01-06 20:15:00	0	0	0	5.4	1024.9	84.2	0
2019-01-06 20:30:00	0	0	0	5.3	1025	85.3	0
2019-01-06 20:45:00	0	0	0	5.3	1025.1	85.7	0
2019-01-06 21:00:00	0	0	0	5.3	1025	84.8	0
2019-01-06 21:15:00	0	0	0	5.4	1024.9	85.2	0
2019-01-06 21:30:00	0	0	0	5.1	1024.8	85.5	0
2019-01-06 21:45:00	0	0	0	5.1	1024.8	85.7	0
2019-01-06 22:00:00	0	0	0	5.2	1025	86.3	0
2019-01-06 22:15:00	0	0	0	5	1025	86.4	0
2019-01-06 22:30:00	0	0	0	5.1	1025	86.3	0
2019-01-06 22:45:00	0	0	0	5.2	1025.1	86.5	0
2019-01-06 23:00:00	0	0	0	5.2	1025.1	86.2	0
2019-01-06 23:15:00	0	0	0	4.9	1024.9	86.2	0
2019-01-06 23:30:00	0	0	0	4.9	1025	85.9	0
2019-01-06 23:45:00	0	0	0	5	1024.8	85	0
2019-01-07	0	0	0	5	1024.8	84.4	0
2019-01-07 00:15:00	0	0	0	5	1024.8	84	0
2019-01-07 00:30:00	0	0	0	4.9	1024.9	84.3	0
2019-01-07 00:45:00	0	0	0	5	1024.9	84.1	0
2019-01-07 01:00:00	0	0	0	4.8	1025	84.1	0
2019-01-07 01:15:00	0	0	0	4.8	1025	84.3	0
2019-01-07 01:30:00	0	0	0	4.7	1024.9	84.1	0
2019-01-07 01:45:00	0	0	0	4.6	1024.8	84.4	0
2019-01-07 02:00:00	0	0	0	4.6	1024.7	84.6	0
2019-01-07 02:15:00	0	0	0	4.6	1024.6	84.8	0
2019-01-07 02:30:00	0	0	0	4.5	1024.7	84.3	0
2019-01-07 02:45:00	0	0	0	4.5	1024.3	84.4	0
2019-01-07 03:00:00	0	0	0	4.6	1024.3	84.1	0
2019-01-07 03:15:00	0	0	0	4.5	1024.3	84.5	0
2019-01-07 03:30:00	0	0	0	4.4	1024.1	84.6	0
2019-01-07 03:45:00	0	0	0	4.4	1023.9	84.8	0
2019-01-07 04:00:00	0	0	0	4.4	1023.9	84.4	0
2019-01-07 04:15:00	0	0	0	4.4	1023.8	84.9	0
2019-01-07 04:30:00	0	0	0	4.2	1023.8	84.6	0
2019-01-07 04:45:00	0	0	0	4.2	1023.9	84.7	0
2019-01-07 05:00:00	0	0	0	4.2	1023.7	84.9	0
2019-01-07 05:15:00	0	0	0	4	1023.9	85.2	0
2019-01-07 05:30:00	0	0	0	3.9	1023.9	84.7	0
2019-01-07 05:45:00	0	0	0	3.8	1024	84.8	0
2019-01-07 06:00:00	0	0	0	3.8	1024	84.9	0
2019-01-07 06:15:00	0	0	0	3.6	1024.1	85.5	0
2019-01-07 06:30:00	0	0	0	3.6	1024	86	0
2019-01-07 06:45:00	0	0	0	3.5	1024.2	86	0
2019-01-07 07:00:00	0	0	0	3.5	1024.2	86.1	0
2019-01-07 07:15:00	0	0	0	3.5	1024.3	86.5	0
2019-01-07 07:30:00	0	0	1	3.5	1024.6	86.1	0
2019-01-07 07:45:00	5	0	4	3.6	1024.8	86	0.07
2019-01-07 08:00:00	12	0	9	3.6	1025	86.6	0.62
2019-01-07 08:15:00	13	0	10	3.5	1025.3	86.2	0.82
2019-01-07 08:30:00	18	0	14	3.5	1025.2	86.4	1.39
2019-01-07 08:45:00	21	0	15	3.5	1025.5	86.7	1.71
2019-01-07 09:00:00	27	0	20	3.5	1025.7	86.3	2.42
2019-01-07 09:15:00	36	0	26	3.6	1025.7	86.2	3.46
2019-01-07 09:30:00	41	0	30	3.7	1026	85.9	4.1
2019-01-07 09:45:00	48	0	36	3.7	1026.1	85.4	5
2019-01-07 10:00:00	57	0	43	3.8	1026.2	85.7	5.79
2019-01-07 10:15:00	63	0	47	4	1026.4	85.2	6.62
2019-01-07 10:30:00	74	0	55	4.1	1026.4	85.2	7.84
2019-01-07 10:45:00	81	0	59	4.2	1026.3	84.7	8.5
2019-01-07 11:00:00	76	0	56	4.3	1026.1	84.4	7.84
2019-01-07 11:15:00	73	0	54	4.4	1026	83.8	7.58
2019-01-07 11:30:00	73	0	54	4.4	1026	83.9	8.06
2019-01-07 11:45:00	68	0	50	4.5	1025.9	83.7	7.19
2019-01-07 12:00:00	72	0	53	4.5	1025.7	83.4	8.18
2019-01-07 12:15:00	69	0	51	4.5	1025.5	83.4	7.34
2019-01-07 12:30:00	60	0	44	4.6	1025.2	83.1	6.67
2019-01-07 12:45:00	65	0	48	4.6	1025	82.7	7.4
2019-01-07 13:00:00	70	0	52	4.6	1024.8	82.7	7.64
2019-01-07 13:15:00	70	0	52	4.3	1024.5	83	7.46
2019-01-07 13:30:00	77	0	58	4.7	1024.5	82.6	8.4
2019-01-07 13:45:00	69	0	50	4.8	1024.3	82.2	7.35
2019-01-07 14:00:00	55	0	41	4.8	1024.4	82.1	5.41
2019-01-07 14:15:00	46	0	34	4.8	1024.5	82.5	4.74
2019-01-07 14:30:00	38	0	28	4.9	1024.5	82.4	3.9
2019-01-07 14:45:00	40	0	30	5	1024.6	81.2	4
2019-01-07 15:00:00	50	0	38	4.9	1024.5	81.2	5.17
2019-01-07 15:15:00	55	0	40	5	1024.5	81.6	5.59
2019-01-07 15:30:00	52	0	38	4.9	1024.5	81.3	4.95
2019-01-07 15:45:00	46	0	33	4.9	1024.6	82	4.4
2019-01-07 16:00:00	33	0	25	4.7	1024.7	82.5	3.22
2019-01-07 16:15:00	30	0	23	4.6	1025	82.8	2.74
2019-01-07 16:30:00	22	0	17	4.6	1025.2	83.2	1.82
2019-01-07 16:45:00	13	0	9	4.4	1025.3	83.5	0.96
2019-01-07 17:00:00	9	0	7	4.4	1025.5	83.9	0.42
2019-01-07 17:15:00	3	0	2	4.2	1025.9	84.8	0
2019-01-07 17:30:00	0	0	0	4.1	1026	84.4	0
2019-01-07 17:45:00	0	0	0	3.9	1026.1	84.6	0
2019-01-07 18:00:00	0	0	0	4	1026.2	84.9	0
2019-01-07 18:15:00	0	0	0	4	1026.5	85.2	0
2019-01-07 18:30:00	0	0	0	3.9	1026.6	84.7	0
2019-01-07 18:45:00	0	0	0	3.9	1026.6	84.9	0
2019-01-07 19:00:00	0	0	0	3.9	1026.8	85.2	0
2019-01-07 19:15:00	0	0	0	3.9	1026.9	85.2	0
2019-01-07 19:30:00	0	0	0	3.8	1027	84.8	0
2019-01-07 19:45:00	0	0	0	3.8	1027	84.6	0
2019-01-07 20:00:00	0	0	0	3.7	1027.2	84.9	0
2019-01-07 20:15:00	0	0	0	3.7	1027.2	84.9	0
2019-01-07 20:30:00	0	0	0	3.7	1027.5	85	0
2019-01-07 20:45:00	0	0	0	3.6	1027.8	85.2	0
2019-01-07 21:00:00	0	0	0	3.6	1028	85.5	0
2019-01-07 21:15:00	0	0	0	3.6	1028	85.5	0
2019-01-07 21:30:00	0	0	0	3.6	1028.1	85.3	0
2019-01-07 21:45:00	0	0	0	3.6	1028.4	84.8	0
2019-01-07 22:00:00	0	0	0	3.6	1028.5	83.6	0
2019-01-07 22:15:00	0	0	0	3.6	1028.4	83.4	0
2019-01-07 22:30:00	0	0	0	3.5	1028.5	82.9	0
2019-01-07 22:45:00	0	0	0	3.4	1028.4	82.3	0
2019-01-07 23:00:00	0	0	0	3.3	1028.1	82.8	0
2019-01-07 23:15:00	0	0	0	3.2	1028.2	82.5	0
2019-01-07 23:30:00	0	0	0	3.3	1028.2	82.6	0
2019-01-07 23:45:00	0	0	0	3.2	1028.2	82.8	0
2019-01-08	0	0	0	3.2	1028.4	83	0
2019-01-08 00:15:00	0	0	0	3.2	1028.2	83.2	0
2019-01-08 00:30:00	0	0	0	3.2	1028.4	83.4	0
2019-01-08 00:45:00	0	0	0	3.2	1028.6	83.5	0
2019-01-08 01:00:00	0	0	0	3.1	1028.6	83.6	0
2019-01-08 01:15:00	0	0	0	3.1	1028.5	83.7	0
2019-01-08 01:30:00	0	0	0	3	1028.6	84.1	0
2019-01-08 01:45:00	0	0	0	3	1028.5	84.2	0
2019-01-08 02:00:00	0	0	0	2.9	1028.6	84.3	0
2019-01-08 02:15:00	0	0	0	3	1028.6	84.1	0
2019-01-08 02:30:00	0	0	0	2.9	1028.6	84.6	0
2019-01-08 02:45:00	0	0	0	2.9	1028.8	84.3	0
2019-01-08 03:00:00	0	0	0	2.9	1028.7	84.9	0
2019-01-08 03:15:00	0	0	0	2.8	1028.6	85.1	0
2019-01-08 03:30:00	0	0	0	2.7	1028.5	85.2	0
2019-01-08 03:45:00	0	0	0	2.7	1028.4	85.5	0
2019-01-08 04:00:00	0	0	0	2.7	1028.2	85.8	0
2019-01-08 04:15:00	0	0	0	2.5	1028.2	86.1	0
2019-01-08 04:30:00	0	0	0	2.6	1028.2	85.8	0
2019-01-08 04:45:00	0	0	0	2.6	1028.2	86.1	0
2019-01-08 05:00:00	0	0	0	2.7	1028.1	86.6	0
2019-01-08 05:15:00	0	0	0	2.7	1028.1	86.6	0
2019-01-08 05:30:00	0	0	0	2.6	1027.7	86.4	0
2019-01-08 05:45:00	0	0	0	2.7	1028.1	86.6	0
2019-01-08 06:00:00	0	0	0	2.7	1028.3	86.5	0
2019-01-08 06:15:00	0	0	0	2.7	1028.6	86.6	0
2019-01-08 06:30:00	0	0	0	2.6	1028.4	86.4	0
2019-01-08 06:45:00	0	0	0	2.6	1028.5	86.5	0
2019-01-08 07:00:00	0	0	0	2.5	1028.4	86.3	0
2019-01-08 07:15:00	0	0	0	2.6	1028.2	86.3	0
2019-01-08 07:30:00	1	0	1	2.6	1028.5	86.4	0
2019-01-08 07:45:00	14	0	10	2.7	1028.6	86.4	0.94
2019-01-08 08:00:00	35	0	26	2.9	1028.9	86.1	3.34
2019-01-08 08:15:00	61	0	44	3	1029	86.2	6.36
2019-01-08 08:30:00	76	0	56	3.4	1029.3	85.7	8.05
2019-01-08 08:45:00	108	0	77	3.3	1029.4	85.1	11.62
2019-01-08 09:00:00	160	0	114	3.5	1029.4	84.7	16.76
2019-01-08 09:15:00	190	0	135	3.7	1029.7	84.3	19.39
2019-01-08 09:30:00	215	0	151	3.9	1029.7	83.6	22.73
2019-01-08 09:45:00	186	0	132	4.1	1029.7	83.1	19.78
2019-01-08 10:00:00	185	0	130	4.3	1030	82.3	20.15
2019-01-08 10:15:00	161	0	115	4.4	1030	81.2	15.98
2019-01-08 10:30:00	132	0	95	4.5	1029.7	81	12.77
2019-01-08 10:45:00	348	0	245	4.8	1029.7	81	41.81
2019-01-08 11:00:00	175	0	121	5.1	1029.7	79.7	17.31
2019-01-08 11:15:00	259	0	183	5.3	1029.2	79.3	26.77
2019-01-08 11:30:00	203	0	145	5.4	1029	79.1	21.14
2019-01-08 11:45:00	227	0	163	5.5	1028.7	79	23.95
2019-01-08 12:00:00	275	0	196	5.5	1028.5	78.2	31.61
2019-01-08 12:15:00	225	0	164	5.6	1027.9	77.6	22.4
2019-01-08 12:30:00	144	0	109	5.6	1027.8	77.2	13.53
2019-01-08 12:45:00	222	0	160	5.8	1027.9	77.8	23.12
2019-01-08 13:00:00	136	0	99	5.8	1027.8	76.5	14.72
2019-01-08 13:15:00	98	0	72	5.6	1027.2	77	10.97
2019-01-08 13:30:00	93	0	69	5.7	1027.4	76.7	9.98
2019-01-08 13:45:00	91	0	66	5.7	1027.3	76.7	9.74
2019-01-08 14:00:00	121	0	88	5.9	1027.1	76.8	14.11
2019-01-08 14:15:00	92	0	68	5.8	1026.9	76.9	9.51
2019-01-08 14:30:00	57	0	42	5.8	1027	77.7	6.14
2019-01-08 14:45:00	52	0	39	5.6	1027.1	78.4	5.57
2019-01-08 15:00:00	68	0	51	5.6	1026.7	79.3	7.17
2019-01-08 15:15:00	53	0	39	5.5	1027	79.3	5.32
2019-01-08 15:30:00	53	0	39	5.4	1026.8	80.4	5.47
2019-01-08 15:45:00	27	0	21	5.4	1027.3	80.3	2.56
2019-01-08 16:00:00	18	0	13	5.4	1027.7	80.6	1.53
2019-01-08 16:15:00	14	0	10	5.2	1027.6	80.5	1.14
2019-01-08 16:30:00	10	0	7	5.2	1027.5	81.3	0.66
2019-01-08 16:45:00	5	0	4	5.1	1028	81.3	0.16
2019-01-08 17:00:00	1	0	1	5	1028.3	82.6	0
2019-01-08 17:15:00	0	0	0	4.7	1028.2	83.6	0
2019-01-08 17:30:00	0	0	0	4.6	1028.4	84.3	0
2019-01-08 17:45:00	0	0	0	4.5	1028.4	84.9	0
2019-01-08 18:00:00	0	0	0	4.2	1028.5	85.7	0
2019-01-08 18:15:00	0	0	0	4	1028.8	86.5	0
2019-01-08 18:30:00	0	0	0	3.8	1029.3	86.8	0
2019-01-08 18:45:00	0	0	0	3.5	1029.5	87	0
2019-01-08 19:00:00	0	0	0	3.3	1029.7	86.5	0
2019-01-08 19:15:00	0	0	0	3.1	1029.5	85.8	0
2019-01-08 19:30:00	0	0	0	2.9	1029.8	85.7	0
2019-01-08 19:45:00	0	0	0	2.8	1029.8	84.8	0
2019-01-08 20:00:00	0	0	0	2.8	1030	84.1	0
2019-01-08 20:15:00	0	0	0	2.6	1030	83.8	0
2019-01-08 20:30:00	0	0	0	2.7	1030.2	83.3	0
2019-01-08 20:45:00	0	0	0	2.5	1030.4	82.6	0
2019-01-08 21:00:00	0	0	0	2.5	1030.4	82.4	0
2019-01-08 21:15:00	0	0	0	2.4	1030.7	81.9	0
2019-01-08 21:30:00	0	0	0	2.2	1030.9	81.6	0
2019-01-08 21:45:00	0	0	0	2.4	1030.5	81.1	0
2019-01-08 22:00:00	0	0	0	2.2	1030.5	80.8	0
2019-01-08 22:15:00	0	0	0	2.1	1030.3	80.6	0
2019-01-08 22:30:00	0	0	0	2.1	1030.4	80.4	0
2019-01-08 22:45:00	0	0	0	2.2	1030.5	80	0
2019-01-08 23:00:00	0	0	0	2.1	1030.3	80	0
2019-01-08 23:15:00	0	0	0	2.2	1030.2	79.7	0
2019-01-08 23:30:00	0	0	0	2.3	1030.3	79.7	0
2019-01-08 23:45:00	0	0	0	2.2	1030	79.8	0
2019-01-09	0	0	0	2.2	1030.1	79.3	0
2019-01-09 00:15:00	0	0	0	2.1	1030.4	79.4	0
2019-01-09 00:30:00	0	0	0	2.2	1030.3	79	0
2019-01-09 00:45:00	0	0	0	2.1	1030.3	79.2	0
2019-01-09 01:00:00	0	0	0	2	1030	79.5	0
2019-01-09 01:15:00	0	0	0	1.9	1029.7	79.1	0
2019-01-09 01:30:00	0	0	0	1.8	1029.9	79.4	0
2019-01-09 01:45:00	0	0	0	1.6	1030	79	0
2019-01-09 02:00:00	0	0	0	1.6	1029.8	79.3	0
2019-01-09 02:15:00	0	0	0	1.6	1030	78.9	0
2019-01-09 02:30:00	0	0	0	1.5	1030	79.5	0
2019-01-09 02:45:00	0	0	0	1.5	1030	79	0
2019-01-09 03:00:00	0	0	0	1.5	1029.8	79.4	0
2019-01-09 03:15:00	0	0	0	1.4	1029.6	79	0
2019-01-09 03:30:00	0	0	0	1.5	1029.3	78.7	0
2019-01-09 03:45:00	0	0	0	1.7	1029.4	78.6	0
2019-01-09 04:00:00	0	0	0	1.7	1028.9	78.4	0
2019-01-09 04:15:00	0	0	0	1.8	1028.7	78.5	0
2019-01-09 04:30:00	0	0	0	1.8	1028.5	78.4	0
2019-01-09 04:45:00	0	0	0	1.8	1028.4	78.4	0
2019-01-09 05:00:00	0	0	0	1.8	1028.3	78.3	0
2019-01-09 05:15:00	0	0	0	1.9	1028.4	78.4	0
2019-01-09 05:30:00	0	0	0	2.1	1028.6	78.2	0
2019-01-09 05:45:00	0	0	0	1.9	1028.9	78	0
2019-01-09 06:00:00	0	0	0	1.9	1028.9	78	0
2019-01-09 06:15:00	0	0	0	2	1028.7	78.1	0
2019-01-09 06:30:00	0	0	0	1.9	1028.7	78.3	0
2019-01-09 06:45:00	0	0	0	1.7	1028.7	78.4	0
2019-01-09 07:00:00	0	0	0	1.8	1028.5	78.3	0
2019-01-09 07:15:00	0	0	0	1.8	1028.7	78.3	0
2019-01-09 07:30:00	0	0	0	1.7	1029	78.1	0
2019-01-09 07:45:00	2	0	1	1.7	1028.7	78.4	0
2019-01-09 08:00:00	7	0	6	1.7	1028.9	78	0.23
2019-01-09 08:15:00	14	0	11	1.8	1029	78.4	1.1
2019-01-09 08:30:00	19	0	14	2	1029	78.3	1.5
2019-01-09 08:45:00	22	0	16	2	1029.1	78.2	1.8
2019-01-09 09:00:00	23	0	17	2	1029.4	78	2.08
2019-01-09 09:15:00	30	0	23	2	1029.4	78	2.97
2019-01-09 09:30:00	68	0	49	2	1029.4	78.3	8.01
2019-01-09 09:45:00	78	0	58	2.2	1029.2	78	8.61
2019-01-09 10:00:00	115	0	84	2.2	1029	78	12.69
2019-01-09 10:15:00	95	0	70	2.3	1028.8	78	10.53
2019-01-09 10:30:00	97	0	71	2.4	1028.6	78	11.32
2019-01-09 10:45:00	96	0	72	2.6	1028.4	77.7	11.75
2019-01-09 11:00:00	70	0	51	2.9	1028.3	77.7	7.91
2019-01-09 11:15:00	80	0	60	2.9	1028.1	77.7	9.36
2019-01-09 11:30:00	91	0	66	3.1	1027.9	78	9.29
2019-01-09 11:45:00	96	0	70	3.4	1027.4	78.1	11.28
2019-01-09 12:00:00	96	0	72	3.2	1026.8	78.2	10.48
2019-01-09 12:15:00	79	0	56	3.4	1026.6	78	9.71
2019-01-09 12:30:00	50	0	36	3.4	1026.4	78.2	5.1
2019-01-09 12:45:00	42	0	30	3.4	1026.1	78.7	4.65
2019-01-09 13:00:00	55	0	41	3.4	1025.7	78.7	5.99
2019-01-09 13:15:00	47	0	35	3.4	1025.3	79	5.08
2019-01-09 13:30:00	48	0	35	3.3	1025.5	79	5.54
2019-01-09 13:45:00	35	0	26	3.3	1025.9	79.7	3.45
2019-01-09 14:00:00	37	0	27	3.2	1025.9	80.6	3.47
2019-01-09 14:15:00	58	0	43	3.2	1025.2	80.3	6.45
2019-01-09 14:30:00	62	0	45	3.3	1024.9	80.6	6.37
2019-01-09 14:45:00	72	0	53	3.2	1024.5	80.8	7.61
2019-01-09 15:00:00	52	0	38	3.5	1024.5	81	5.01
2019-01-09 15:15:00	46	0	34	3.5	1024.2	80.8	4.41
2019-01-09 15:30:00	39	0	29	3.6	1024.1	81.1	3.31
2019-01-09 15:45:00	18	0	13	3.7	1024.3	80.8	1.76
2019-01-09 16:00:00	19	0	14	3.7	1024.5	80.9	2
2019-01-09 16:15:00	21	0	16	3.7	1024.4	80.9	1.8
2019-01-09 16:30:00	12	0	9	3.7	1024.8	80.4	0.89
2019-01-09 16:45:00	5	0	4	3.6	1024.8	80.3	0.07
2019-01-09 17:00:00	9	0	7	3.6	1024.3	80.2	0.37
2019-01-09 17:15:00	0	0	0	3.4	1025.2	79.8	0
2019-01-09 17:30:00	0	0	0	3.5	1025.2	80.2	0
2019-01-09 17:45:00	0	0	0	3.4	1025.1	79.8	0
2019-01-09 18:00:00	0	0	0	3.4	1025.5	80.1	0
2019-01-09 18:15:00	0	0	0	3.3	1025.3	80.1	0
2019-01-09 18:30:00	0	0	0	3	1025.1	80.5	0
2019-01-09 18:45:00	0	0	0	3.1	1025.3	80.4	0
2019-01-09 19:00:00	0	0	0	3	1025.4	80.3	0
2019-01-09 19:15:00	0	0	0	3	1025.4	80.3	0
2019-01-09 19:30:00	0	0	0	3	1025	80.3	0
2019-01-09 19:45:00	0	0	0	3.1	1025.1	80.2	0
2019-01-09 20:00:00	0	0	0	3	1025	80.4	0
2019-01-09 20:15:00	0	0	0	2.9	1025.4	80.4	0
2019-01-09 20:30:00	0	0	0	2.9	1025.4	80.8	0
2019-01-09 20:45:00	0	0	0	2.8	1025.6	80.1	0
2019-01-09 21:00:00	0	0	0	2.8	1025.8	80.7	0
2019-01-09 21:15:00	0	0	0	2.6	1025.5	80.9	0
2019-01-09 21:30:00	0	0	0	2.6	1025.5	80.9	0
2019-01-09 21:45:00	0	0	0	2.5	1025.8	81	0
2019-01-09 22:00:00	0	0	0	2.5	1025.7	81.2	0
2019-01-09 22:15:00	0	0	0	2.6	1025.6	80.8	0
2019-01-09 22:30:00	0	0	0	2.5	1025.5	81.1	0
2019-01-09 22:45:00	0	0	0	2.5	1025.8	81.3	0
2019-01-09 23:00:00	0	0	0	2.5	1026	81.6	0
2019-01-09 23:15:00	0	0	0	2.5	1026	81.8	0
2019-01-09 23:30:00	0	0	0	2.5	1026.2	81.2	0
2019-01-09 23:45:00	0	0	0	2.3	1026.1	81.4	0
2019-01-10	0	0	0	2.3	1025.9	81	0
2019-01-10 00:15:00	0	0	0	2.2	1025.9	81.5	0
2019-01-10 00:30:00	0	0	0	2.2	1025.7	81.5	0
2019-01-10 00:45:00	0	0	0	2.2	1025.7	81.6	0
2019-01-10 01:00:00	0	0	0	2.4	1025.7	81.6	0
2019-01-10 01:15:00	0	0	0	2.2	1025.6	82.3	0
2019-01-10 01:30:00	0	0	0	2.3	1025.5	82	0
2019-01-10 01:45:00	0	0	0	2.3	1025.5	81.9	0
2019-01-10 02:00:00	0	0	0	2.2	1025.6	82	0
2019-01-10 02:15:00	0	0	0	2.2	1025.6	82.1	0
2019-01-10 02:30:00	0	0	0	2.3	1025.3	82.6	0
2019-01-10 02:45:00	0	0	0	2.2	1025.2	82.5	0
2019-01-10 03:00:00	0	0	0	2.1	1025.1	82.4	0
2019-01-10 03:15:00	0	0	0	2.1	1025.1	82.8	0
2019-01-10 03:30:00	0	0	0	2.2	1025.3	82.9	0
2019-01-10 03:45:00	0	0	0	2.2	1025.1	83.3	0
2019-01-10 04:00:00	0	0	0	2.1	1024.7	83.4	0
2019-01-10 04:15:00	0	0	0	2.1	1024.5	83.4	0
2019-01-10 04:30:00	0	0	0	2	1024.4	83.5	0
2019-01-10 04:45:00	0	0	0	2.1	1024.4	83.4	0
2019-01-10 05:00:00	0	0	0	2.2	1024.5	83.4	0
2019-01-10 05:15:00	0	0	0	2.2	1024.7	83.3	0
2019-01-10 05:30:00	0	0	0	2.2	1024.7	83.3	0
2019-01-10 05:45:00	0	0	0	2	1024.7	83.8	0
2019-01-10 06:00:00	0	0	0	2.2	1024.9	83.6	0
2019-01-10 06:15:00	0	0	0	2.1	1024.7	83.6	0
2019-01-10 06:30:00	0	0	0	2	1024.7	84	0
2019-01-10 06:45:00	0	0	0	2	1025.1	84.1	0
2019-01-10 07:00:00	0	0	0	1.9	1024.9	84.4	0
2019-01-10 07:15:00	0	0	0	2	1025	84.6	0
2019-01-10 07:30:00	4	0	3	1.9	1025	85	0
2019-01-10 07:45:00	12	0	9	1.7	1024.9	84.9	0.64
2019-01-10 08:00:00	36	0	26	1.7	1025.1	84.6	3.33
2019-01-10 08:15:00	32	0	24	1.7	1025.1	84.5	2.99
2019-01-10 08:30:00	57	0	41	2	1025.3	84	5
2019-01-10 08:45:00	58	0	43	2	1025.6	83.8	6.15
2019-01-10 09:00:00	125	0	91	2.2	1025.9	84.2	13.54
2019-01-10 09:15:00	66	0	48	2.5	1026	84.6	8.18
2019-01-10 09:30:00	89	0	67	2.5	1025.6	85.3	8.87
2019-01-10 09:45:00	98	0	73	2.6	1025.9	85.4	9.62
2019-01-10 10:00:00	71	0	52	2.9	1026	85.1	8.07
2019-01-10 10:15:00	140	0	102	3	1025.6	85.7	15.61
2019-01-10 10:30:00	143	0	107	3.1	1025.9	86.1	14.61
2019-01-10 10:45:00	144	0	106	3.2	1025.4	86.3	15.25
2019-01-10 11:00:00	121	0	90	3.4	1025.4	86.7	14.74
2019-01-10 11:15:00	117	0	86	3.6	1024.9	86.7	13.79
2019-01-10 11:30:00	131	0	96	3.5	1025.1	86.8	14.07
2019-01-10 11:45:00	97	0	73	3.7	1024.8	86.9	9.46
2019-01-10 12:00:00	94	0	71	3.5	1024.3	87.1	9.14
2019-01-10 12:15:00	117	0	88	3.6	1023.9	86.7	10.88
2019-01-10 12:30:00	134	0	100	3.7	1023.7	87.1	11.85
2019-01-10 12:45:00	183	0	135	3.7	1023.2	86.9	17.01
2019-01-10 13:00:00	128	0	97	3.8	1023.2	86.9	12.24
2019-01-10 13:15:00	160	0	119	3.9	1023	87	16.39
2019-01-10 13:30:00	212	0	153	4.1	1022.5	86.2	20.96
2019-01-10 13:45:00	191	0	142	4.4	1022.2	86.2	21.5
2019-01-10 14:00:00	207	0	149	4.7	1022.1	86.2	22.47
2019-01-10 14:15:00	195	0	144	4.7	1021.9	86	18.65
2019-01-10 14:30:00	156	0	114	4.7	1021.5	86	16.3
2019-01-10 14:45:00	128	0	98	4.9	1021.4	85.7	13.03
2019-01-10 15:00:00	111	0	83	5.2	1021.5	85.4	10.97
2019-01-10 15:15:00	80	0	60	5.3	1021.4	85	8.69
2019-01-10 15:30:00	85	0	62	5.5	1021.2	84.9	8.83
2019-01-10 15:45:00	56	0	43	5.5	1021.4	84.9	6.58
2019-01-10 16:00:00	36	0	26	5.3	1021.8	84.8	5.07
2019-01-10 16:15:00	38	0	27	5.2	1021.9	84.9	3.56
2019-01-10 16:30:00	25	0	18	5.2	1022	85.3	2
2019-01-10 16:45:00	14	0	11	5.1	1022	85.7	0.89
2019-01-10 17:00:00	5	0	4	5	1022.4	85.7	0.14
2019-01-10 17:15:00	3	0	2	4.9	1022.3	85.7	0
2019-01-10 17:30:00	0	0	0	4.7	1022.3	86.3	0
2019-01-10 17:45:00	0	0	0	4.5	1022.4	86.5	0
2019-01-10 18:00:00	0	0	0	4.2	1022.6	86.6	0
2019-01-10 18:15:00	0	0	0	3.7	1022.9	86.9	0
2019-01-10 18:30:00	0	0	0	3.6	1023.1	87.3	0
2019-01-10 18:45:00	0	0	0	3.5	1023.2	87.6	0
2019-01-10 19:00:00	0	0	0	3.3	1023	87.4	0
2019-01-10 19:15:00	0	0	0	3.2	1023.2	87.2	0
2019-01-10 19:30:00	0	0	0	3.1	1023.5	87	0
2019-01-10 19:45:00	0	0	0	3.1	1023.6	86.7	0
2019-01-10 20:00:00	0	0	0	3.1	1023.7	86.4	0
2019-01-10 20:15:00	0	0	0	2.9	1023.9	86.2	0
2019-01-10 20:30:00	0	0	0	2.8	1023.5	85.6	0
2019-01-10 20:45:00	0	0	0	2.8	1023.7	85.4	0
2019-01-10 21:00:00	0	0	0	2.7	1023.5	84.7	0
2019-01-10 21:15:00	0	0	0	2.7	1023.7	84.4	0
2019-01-10 21:30:00	0	0	0	2.8	1023.8	84.1	0
2019-01-10 21:45:00	0	0	0	2.9	1023.8	83.9	0
2019-01-10 22:00:00	0	0	0	2.9	1024	83.6	0
2019-01-10 22:15:00	0	0	0	2.7	1023.9	83.2	0
2019-01-10 22:30:00	0	0	0	2.6	1023.9	83.3	0
2019-01-10 22:45:00	0	0	0	2.6	1024.3	82.7	0
2019-01-10 23:00:00	0	0	0	2.7	1024.6	82.4	0
2019-01-10 23:15:00	0	0	0	2.6	1024.4	82.7	0
2019-01-10 23:30:00	0	0	0	2.7	1024.4	82	0
2019-01-10 23:45:00	0	0	0	2.5	1024.4	82.1	0
2019-01-11	0	0	0	2.5	1024.1	81.8	0
2019-01-11 00:15:00	0	0	0	2.4	1024	81.5	0
2019-01-11 00:30:00	0	0	0	2.4	1024	81.3	0
2019-01-11 00:45:00	0	0	0	2.4	1024	80.9	0
2019-01-11 01:00:00	0	0	0	2.5	1023.6	80.6	0
2019-01-11 01:15:00	0	0	0	2.5	1023.7	80.2	0
2019-01-11 01:30:00	0	0	0	2.6	1023.5	80.3	0
2019-01-11 01:45:00	0	0	0	2.5	1023.4	80.1	0
2019-01-11 02:00:00	0	0	0	2.6	1023.4	79.9	0
2019-01-11 02:15:00	0	0	0	2.5	1023.3	80	0
2019-01-11 02:30:00	0	0	0	2.6	1023.1	80	0
2019-01-11 02:45:00	0	0	0	2.5	1023.1	80.5	0
2019-01-11 03:00:00	0	0	0	2.6	1022.8	80.8	0
2019-01-11 03:15:00	0	0	0	2.7	1022.8	81.1	0
2019-01-11 03:30:00	0	0	0	2.6	1022.7	81.5	0
2019-01-11 03:45:00	0	0	0	2.5	1021.9	81.7	0
2019-01-11 04:00:00	0	0	0	2.4	1021.5	82.1	0
2019-01-11 04:15:00	0	0	0	2.4	1021.6	81.7	0
2019-01-11 04:30:00	0	0	0	2.4	1021.6	82.2	0
2019-01-11 04:45:00	0	0	0	2.5	1021.9	82.4	0
2019-01-11 05:00:00	0	0	0	2.5	1022.1	82.3	0
2019-01-11 05:15:00	0	0	0	2.6	1021.6	82.8	0
2019-01-11 05:30:00	0	0	0	2.5	1022	82.7	0
2019-01-11 05:45:00	0	0	0	2.6	1021.9	82.8	0
2019-01-11 06:00:00	0	0	0	2.5	1022	82.9	0
2019-01-11 06:15:00	0	0	0	2.5	1022.1	82.8	0
2019-01-11 06:30:00	0	0	0	2.5	1022.4	82.8	0
2019-01-11 06:45:00	0	0	0	2.6	1022.5	82.3	0
2019-01-11 07:00:00	0	0	0	2.5	1022.4	82.4	0
2019-01-11 07:15:00	0	0	0	2.4	1023	81.7	0
2019-01-11 07:30:00	0	0	0	2.5	1022.9	81.6	0
2019-01-11 07:45:00	2	0	2	2.4	1023	81.7	0
2019-01-11 08:00:00	17	0	13	2.3	1022.9	81.3	1.17
2019-01-11 08:15:00	18	0	13	2.3	1022.9	81.3	1.47
2019-01-11 08:30:00	33	0	24	2.3	1022.5	81.4	2.97
2019-01-11 08:45:00	37	0	28	2.3	1022.7	81.5	3.89
2019-01-11 09:00:00	33	0	25	2.3	1023	81.1	3.1
2019-01-11 09:15:00	36	0	26	2.5	1023.4	81	3.44
2019-01-11 09:30:00	57	0	41	2.5	1023.3	81.4	5.82
2019-01-11 09:45:00	39	0	29	2.6	1023.7	81.4	4.25
2019-01-11 10:00:00	36	0	27	2.9	1023.9	81.1	3.42
2019-01-11 10:15:00	81	0	58	2.9	1023.7	81.6	9.34
2019-01-11 10:30:00	79	0	58	2.9	1023.7	82	8.58
2019-01-11 10:45:00	94	0	69	3.1	1023.5	82.2	10.23
2019-01-11 11:00:00	100	0	72	3.1	1023.3	82.2	12.38
2019-01-11 11:15:00	129	0	95	3.1	1022.7	82.6	13.8
2019-01-11 11:30:00	136	0	101	3.3	1022.5	82.2	14.69
2019-01-11 11:45:00	87	0	64	3.6	1022.4	82.4	9.92
2019-01-11 12:00:00	77	0	58	3.7	1022	83.4	8.63
2019-01-11 12:15:00	82	0	61	3.8	1021.8	84	8.13
2019-01-11 12:30:00	73	0	56	3.8	1021.5	84.2	8.21
2019-01-11 12:45:00	93	0	70	4	1021	84.6	10.5
2019-01-11 13:00:00	101	0	72	4.1	1020.9	85.2	10.24
2019-01-11 13:15:00	89	0	67	4.1	1020.6	85.3	7.83
2019-01-11 13:30:00	59	0	46	3.9	1020.3	86.1	5.83
2019-01-11 13:45:00	44	0	34	4.3	1020.4	86.3	3.95
2019-01-11 14:00:00	50	0	36	4.1	1020.4	86.8	5.16
2019-01-11 14:15:00	93	0	67	4.2	1020.1	87.1	8.41
2019-01-11 14:30:00	57	0	42	4.4	1020.2	86.6	6.7
2019-01-11 14:45:00	39	0	29	4.2	1020.3	86.9	4.49
2019-01-11 15:00:00	32	0	24	4.2	1020.4	86.8	3.09
2019-01-11 15:15:00	32	0	24	4.3	1020.4	87.1	3.15
2019-01-11 15:30:00	30	0	23	4.1	1020.3	86.8	2.84
2019-01-11 15:45:00	25	0	19	4.1	1020.4	87	1.97
2019-01-11 16:00:00	22	0	17	4.2	1020.7	86.9	1.49
2019-01-11 16:15:00	23	0	18	4.4	1020.8	86.9	1.55
2019-01-11 16:30:00	20	0	15	4.4	1020.9	87	1.3
2019-01-11 16:45:00	21	0	16	4.3	1021	86.9	1.45
2019-01-11 17:00:00	9	0	7	4.4	1021.1	87.1	0.43
2019-01-11 17:15:00	2	0	2	4.3	1021.2	87.1	0
2019-01-11 17:30:00	1	0	1	4.5	1021.1	86.8	0
2019-01-11 17:45:00	0	0	0	4.3	1021.2	87.1	0
2019-01-11 18:00:00	0	0	0	4.1	1021.3	87	0
2019-01-11 18:15:00	0	0	0	4	1021.4	87	0
2019-01-11 18:30:00	0	0	0	4.1	1021.6	87.2	0
2019-01-11 18:45:00	0	0	0	4.2	1021.8	86.6	0
2019-01-11 19:00:00	0	0	0	4.4	1021.9	87	0
2019-01-11 19:15:00	0	0	0	4.3	1022.1	87	0
2019-01-11 19:30:00	0	0	0	4.3	1022.1	86.8	0
2019-01-11 19:45:00	0	0	0	4.2	1022.3	86.6	0
2019-01-11 20:00:00	0	0	0	4.1	1022.3	86.3	0
2019-01-11 20:15:00	0	0	0	4	1022.2	85.6	0
2019-01-11 20:30:00	0	0	0	3.7	1022.3	84.6	0
2019-01-11 20:45:00	0	0	0	3.9	1022.5	83.9	0
2019-01-11 21:00:00	0	0	0	3.7	1022.5	83.5	0
2019-01-11 21:15:00	0	0	0	3.7	1022.5	83.3	0
2019-01-11 21:30:00	0	0	0	3.6	1022.6	83.3	0
2019-01-11 21:45:00	0	0	0	3.6	1022.7	82.9	0
2019-01-11 22:00:00	0	0	0	3.3	1022.6	82.6	0
2019-01-11 22:15:00	0	0	0	2.7	1022.7	82.3	0
2019-01-11 22:30:00	0	0	0	2.6	1023	81.8	0
2019-01-11 22:45:00	0	0	0	2.7	1023.1	81.1	0
2019-01-11 23:00:00	0	0	0	2.5	1023.1	81.2	0
2019-01-11 23:15:00	0	0	0	2.2	1023.2	80.8	0
2019-01-11 23:30:00	0	0	0	2.2	1023.3	80.5	0
2019-01-11 23:45:00	0	0	0	2.3	1023.2	80.7	0
2019-01-12	0	0	0	2.4	1023.3	80	0
2019-01-12 00:15:00	0	0	0	2.5	1023.2	80	0
2019-01-12 00:30:00	0	0	0	2.3	1023.1	79.7	0
2019-01-12 00:45:00	0	0	0	2.3	1023	79.9	0
2019-01-12 01:00:00	0	0	0	2.4	1023.1	79.8	0
2019-01-12 01:15:00	0	0	0	2.5	1022.9	79.5	0
2019-01-12 01:30:00	0	0	0	2.6	1022.8	79.3	0
2019-01-12 01:45:00	0	0	0	2.7	1022.7	79.5	0
2019-01-12 02:00:00	0	0	0	2.9	1022.7	80.2	0
2019-01-12 02:15:00	0	0	0	3	1022.8	80.3	0
2019-01-12 02:30:00	0	0	0	3.1	1022.8	82.7	0
2019-01-12 02:45:00	0	0	0	3.2	1022.8	85.1	0
2019-01-12 03:00:00	0	0	0	3.2	1022.8	86.6	0
2019-01-12 03:15:00	0	0	0	3.2	1022.9	87.2	0
2019-01-12 03:30:00	0	0	0	3.3	1023	87.1	0
2019-01-12 03:45:00	0	0	0	3.3	1023.2	87.1	0
2019-01-12 04:00:00	0	0	0	3.5	1023.1	86.7	0
2019-01-12 04:15:00	0	0	0	3.3	1023.2	87	0
2019-01-12 04:30:00	0	0	0	3.2	1023.1	87.2	0
2019-01-12 04:45:00	0	0	0	3.1	1023.2	87.6	0
2019-01-12 05:00:00	0	0	0	3.2	1023.2	87.3	0
2019-01-12 05:15:00	0	0	0	3	1023.3	87.2	0
2019-01-12 05:30:00	0	0	0	2.7	1023	87.3	0
2019-01-12 05:45:00	0	0	0	2.6	1022.8	87.3	0
2019-01-12 06:00:00	0	0	0	2.5	1022.8	86.8	0
2019-01-12 06:15:00	0	0	0	2.5	1022.7	86.7	0
2019-01-12 06:30:00	0	0	0	2.6	1022.5	86.4	0
2019-01-12 06:45:00	0	0	0	2.5	1022.4	86	0
2019-01-12 07:00:00	0	0	0	2.6	1022.8	86	0
2019-01-12 07:15:00	0	0	0	2.7	1022.9	86.8	0
2019-01-12 07:30:00	5	0	4	2.8	1023.4	86.7	0.04
2019-01-12 07:45:00	17	0	13	3.1	1023.8	86.6	1.37
2019-01-12 08:00:00	41	0	30	3.1	1024.4	87.2	3.95
2019-01-12 08:15:00	31	0	23	3.1	1024.5	87.3	2.65
2019-01-12 08:30:00	39	0	29	3.2	1024.5	86.9	3.47
2019-01-12 08:45:00	45	0	33	3.2	1024.3	86.5	4.27
2019-01-12 09:00:00	62	0	46	3.3	1024.4	85.8	6.69
2019-01-12 09:15:00	46	0	35	3.4	1024.6	85.1	4.21
2019-01-12 09:30:00	85	0	63	3.2	1024.5	85	8.88
2019-01-12 09:45:00	106	0	79	3.3	1024.5	84.9	10.32
2019-01-12 10:00:00	94	0	70	3.5	1024.7	84.4	10.77
2019-01-12 10:15:00	97	0	72	3.7	1024.9	84	10.3
2019-01-12 10:30:00	103	0	76	3.7	1024.9	84.5	10.7
2019-01-12 10:45:00	124	0	91	3.9	1024.8	83.6	13.68
2019-01-12 11:00:00	181	0	132	3.8	1024.4	83.4	20.58
2019-01-12 11:15:00	186	0	137	4.2	1024.2	83.4	20.83
2019-01-12 11:30:00	164	0	121	4.1	1024.1	83	17.81
2019-01-12 11:45:00	211	0	151	4.2	1024	83.2	22.88
2019-01-12 12:00:00	209	0	151	4.5	1023.4	82.5	28.75
2019-01-12 12:15:00	234	0	171	4.8	1023.1	82.3	35.69
2019-01-12 12:30:00	248	0	169	4.8	1022.7	81.2	31.55
2019-01-12 12:45:00	604	0	446	4.7	1022.4	80.6	48.81
2019-01-12 13:00:00	530	0	367	5.7	1021.8	78.1	52.49
2019-01-12 13:15:00	623	0	461	5.4	1021.3	79.2	62.2
2019-01-12 13:30:00	611	0	451	6.5	1021.2	77.1	64.09
2019-01-12 13:45:00	569	0	422	6.7	1021	75.8	63.68
2019-01-12 14:00:00	551	0	411	7	1020.9	73.4	59.96
2019-01-12 14:15:00	543	0	405	7.2	1021.2	73.7	54.48
2019-01-12 14:30:00	236	0	164	6.7	1021.4	74.9	24.58
2019-01-12 14:45:00	280	0	208	6.6	1021.7	76.3	28.41
2019-01-12 15:00:00	258	0	186	6.7	1021.6	76.5	29.87
2019-01-12 15:15:00	189	0	137	6.6	1021.4	76.2	17.91
2019-01-12 15:30:00	135	0	97	6.2	1021.1	76.2	13.04
2019-01-12 15:45:00	194	0	133	6.6	1021.3	75.6	18.34
2019-01-12 16:00:00	168	0	119	7.1	1021.3	74.5	15.23
2019-01-12 16:15:00	149	0	104	6.9	1021.3	74.4	13.16
2019-01-12 16:30:00	143	0	99	7	1021.3	74.6	13.38
2019-01-12 16:45:00	53	0	38	6.9	1020.9	74.2	4.81
2019-01-12 17:00:00	29	0	22	6.6	1021.4	75.3	2.43
2019-01-12 17:15:00	17	0	13	6.7	1021.8	75.1	1.29
2019-01-12 17:30:00	7	0	6	6.3	1021.7	76.6	0.33
2019-01-12 17:45:00	0	0	0	6.1	1022.1	78.5	0
2019-01-12 18:00:00	0	0	0	6.2	1021.9	78.8	0
2019-01-12 18:15:00	0	0	0	5.7	1022	80.2	0
2019-01-12 18:30:00	0	0	0	5.6	1022.1	81.7	0
2019-01-12 18:45:00	0	0	0	5.5	1022.5	82.1	0
2019-01-12 19:00:00	0	0	0	5.4	1022.4	82.9	0
2019-01-12 19:15:00	0	0	0	5.2	1022.7	83.9	0
2019-01-12 19:30:00	0	0	0	4.9	1022.6	85.3	0
2019-01-12 19:45:00	0	0	0	4.8	1023	85.3	0
2019-01-12 20:00:00	0	0	0	4.8	1022.9	85.6	0
2019-01-12 20:15:00	0	0	0	4.7	1023	85.6	0
2019-01-12 20:30:00	0	0	0	4.6	1023.1	85.7	0
2019-01-12 20:45:00	0	0	0	4.5	1023.3	85.8	0
2019-01-12 21:00:00	0	0	0	4.4	1023.4	86.1	0
2019-01-12 21:15:00	0	0	0	4.3	1023.4	86.5	0
2019-01-12 21:30:00	0	0	0	4.2	1023.5	86.8	0
2019-01-12 21:45:00	0	0	0	3.8	1023.7	86.9	0
2019-01-12 22:00:00	0	0	0	3.3	1023.8	87.1	0
2019-01-12 22:15:00	0	0	0	3.8	1024	86.7	0
2019-01-12 22:30:00	0	0	0	3.7	1024.3	86.7	0
2019-01-12 22:45:00	0	0	0	3.6	1024.2	86.8	0
2019-01-12 23:00:00	0	0	0	3.5	1024.1	86.7	0
2019-01-12 23:15:00	0	0	0	3.5	1024.3	86.3	0
2019-01-12 23:30:00	0	0	0	3.4	1024.5	86.6	0
2019-01-12 23:45:00	0	0	0	3.4	1024.5	85.9	0
2019-01-13	0	0	0	3.3	1024.5	85.5	0
2019-01-13 00:15:00	0	0	0	3.4	1024.5	85.5	0
2019-01-13 00:30:00	0	0	0	3.5	1024.3	85.2	0
2019-01-13 00:45:00	0	0	0	3.6	1024.2	85	0
2019-01-13 01:00:00	0	0	0	3.4	1024.3	84.7	0
2019-01-13 01:15:00	0	0	0	3.6	1024.1	84.7	0
2019-01-13 01:30:00	0	0	0	3.6	1024.3	84.6	0
2019-01-13 01:45:00	0	0	0	3.7	1024.2	84.3	0
2019-01-13 02:00:00	0	0	0	3.7	1024	84.2	0
2019-01-13 02:15:00	0	0	0	3.8	1023.9	84	0
2019-01-13 02:30:00	0	0	0	3.8	1023.9	84.1	0
2019-01-13 02:45:00	0	0	0	4	1023.8	83.8	0
2019-01-13 03:00:00	0	0	0	4.1	1023.7	84	0
2019-01-13 03:15:00	0	0	0	4	1023.6	84.2	0
2019-01-13 03:30:00	0	0	0	4.2	1023.6	83.6	0
2019-01-13 03:45:00	0	0	0	4.2	1023.5	83.9	0
2019-01-13 04:00:00	0	0	0	4.1	1023.3	84.3	0
2019-01-13 04:15:00	0	0	0	4	1023.4	83.8	0
2019-01-13 04:30:00	0	0	0	4	1023.4	83.5	0
2019-01-13 04:45:00	0	0	0	4.1	1023.5	83.4	0
2019-01-13 05:00:00	0	0	0	3.8	1023.4	83.8	0
2019-01-13 05:15:00	0	0	0	3.4	1023.6	84.3	0
2019-01-13 05:30:00	0	0	0	3.1	1023.7	84.3	0
2019-01-13 05:45:00	0	0	0	3.1	1023.8	83.5	0
2019-01-13 06:00:00	0	0	0	2.9	1023.9	82.8	0
2019-01-13 06:15:00	0	0	0	2.7	1023.9	82.7	0
2019-01-13 06:30:00	0	0	0	1.6	1024.1	83.2	0
2019-01-13 06:45:00	0	0	0	1.6	1024.5	82.9	0
2019-01-13 07:00:00	0	0	0	1.9	1024.7	82.4	0
2019-01-13 07:15:00	0	0	0	1.7	1024.8	81.8	0
2019-01-13 07:30:00	5	0	3	0	1025.1	83.3	0.31
2019-01-13 07:45:00	20	0	14	0.2	1025.1	82.8	1.64
2019-01-13 08:00:00	43	0	29	0.1	1025.3	82.5	4.17
2019-01-13 08:15:00	63	0	42	-0.2	1025.4	82.4	6.67
2019-01-13 08:30:00	86	0	58	0	1025.5	81.8	8.96
2019-01-13 08:45:00	127	0	89	0.7	1025.6	81.2	13.2
2019-01-13 09:00:00	164	0	111	1.6	1025.3	80.3	17.28
2019-01-13 09:15:00	141	0	100	2.1	1025.1	79.8	18.36
2019-01-13 09:30:00	139	0	95	2.5	1025.1	79.4	13.41
2019-01-13 09:45:00	243	0	167	2.7	1025.2	78.9	21.93
2019-01-13 10:00:00	285	0	197	3.1	1025.3	78.8	23.42
2019-01-13 10:15:00	231	0	163	2.9	1025.1	79	22.34
2019-01-13 10:30:00	210	0	153	3.2	1024.7	78.2	23.93
2019-01-13 10:45:00	387	0	270	3.7	1024.6	77.8	39.93
2019-01-13 11:00:00	556	0	393	4.4	1024.2	77.2	57.3
2019-01-13 11:15:00	588	0	432	5.1	1023.9	77.6	63.71
2019-01-13 11:30:00	612	0	447	6.4	1023.5	77.1	66.3
2019-01-13 11:45:00	641	0	467	7.9	1023	85.1	68.6
2019-01-13 12:00:00	663	0	491	7.5	1022.5	85.2	70.17
2019-01-13 12:15:00	675	0	503	8.1	1022.1	81.5	72.85
2019-01-13 12:30:00	663	0	490	8.6	1022	76.9	71.84
2019-01-13 12:45:00	653	0	483	8.6	1021.8	75.1	69.88
2019-01-13 13:00:00	655	0	488	9.4	1021.5	72	70.15
2019-01-13 13:15:00	646	0	483	9.7	1021.4	69.9	68.88
2019-01-13 13:30:00	644	0	485	10	1021.1	69	69.9
2019-01-13 13:45:00	608	0	460	10.2	1020.8	66.8	65.09
2019-01-13 14:00:00	572	0	435	10.3	1020.6	65.5	63.01
2019-01-13 14:15:00	555	0	417	10.9	1020.4	63.5	61.13
2019-01-13 14:30:00	535	0	404	11.1	1020.3	60	58.38
2019-01-13 14:45:00	506	0	377	11.7	1020.2	59.9	53.85
2019-01-13 15:00:00	469	0	344	11.7	1020.4	55.7	49.1
2019-01-13 15:15:00	439	0	317	11.8	1020.2	52.8	44.21
2019-01-13 15:30:00	387	0	273	12.2	1020.3	51	36.07
2019-01-13 15:45:00	328	0	226	12.5	1020.3	49.7	33.95
2019-01-13 16:00:00	266	0	181	12.4	1020.2	49.4	26.86
2019-01-13 16:15:00	198	0	132	12.4	1020.3	49.5	17.77
2019-01-13 16:30:00	50	0	34	11.9	1020.2	50.7	5.05
2019-01-13 16:45:00	48	0	33	11.5	1020.2	53.5	5.26
2019-01-13 17:00:00	50	0	33	11.2	1020.3	58.6	3.73
2019-01-13 17:15:00	15	0	11	10.9	1020.4	62.3	1.15
2019-01-13 17:30:00	1	0	1	10	1020.5	67.2	0.07
2019-01-13 17:45:00	0	0	0	9.7	1020.5	68.3	0
2019-01-13 18:00:00	0	0	0	9.7	1020.6	70.3	0
2019-01-13 18:15:00	0	0	0	8.8	1020.8	74	0
2019-01-13 18:30:00	0	0	0	8.5	1020.7	76.3	0
2019-01-13 18:45:00	0	0	0	8.2	1020.7	77.5	0
2019-01-13 19:00:00	0	0	0	7.8	1020.8	79.7	0
2019-01-13 19:15:00	0	0	0	7.8	1020.8	79.7	0
2019-01-13 19:30:00	0	0	0	7.3	1021	79.8	0
2019-01-13 19:45:00	0	0	0	7	1021.1	80.5	0
2019-01-13 20:00:00	0	0	0	6.7	1021.3	81.4	0
2019-01-13 20:15:00	0	0	0	6.4	1021.6	82.1	0
2019-01-13 20:30:00	0	0	0	6.1	1021.7	83	0
2019-01-13 20:45:00	0	0	0	5.6	1021.8	84.1	0
2019-01-13 21:00:00	0	0	0	5.6	1022.1	85.1	0
2019-01-13 21:15:00	0	0	0	5.7	1022	84.9	0
2019-01-13 21:30:00	0	0	0	5.7	1022.3	84.7	0
2019-01-13 21:45:00	0	0	0	5.7	1022.7	84.8	0
2019-01-13 22:00:00	0	0	0	5.7	1022.9	84.8	0
2019-01-13 22:15:00	0	0	0	5.5	1023	85.1	0
2019-01-13 22:30:00	0	0	0	5.4	1023.3	85.3	0
2019-01-13 22:45:00	0	0	0	5.2	1023.2	85.4	0
2019-01-13 23:00:00	0	0	0	5.2	1023	85.8	0
2019-01-13 23:15:00	0	0	0	5.1	1022.9	86	0
2019-01-13 23:30:00	0	0	0	5.1	1022.8	85.9	0
2019-01-13 23:45:00	0	0	0	5	1022.8	85.7	0
2019-01-14	0	0	0	5	1022.6	86.2	0
2019-01-14 00:15:00	0	0	0	5.1	1022.7	86.3	0
2019-01-14 00:30:00	0	0	0	5.1	1022.6	85.8	0
2019-01-14 00:45:00	0	0	0	5.2	1022.3	86.1	0
2019-01-14 01:00:00	0	0	0	5.1	1022.4	86.1	0
2019-01-14 01:15:00	0	0	0	4.9	1022.3	86.2	0
2019-01-14 01:30:00	0	0	0	4.9	1022.4	86.4	0
2019-01-14 01:45:00	0	0	0	4.9	1022.3	86.2	0
2019-01-14 02:00:00	0	0	0	5.1	1022.6	86.3	0
2019-01-14 02:15:00	0	0	0	5	1022.5	86.2	0
2019-01-14 02:30:00	0	0	0	4.9	1022.6	86.1	0
2019-01-14 02:45:00	0	0	0	4.7	1022.5	86.1	0
2019-01-14 03:00:00	0	0	0	4.7	1022.1	86.1	0
2019-01-14 03:15:00	0	0	0	4.6	1022	86.3	0
2019-01-14 03:30:00	0	0	0	4.6	1021.9	86.4	0
2019-01-14 03:45:00	0	0	0	4.4	1021.6	86.1	0
2019-01-14 04:00:00	0	0	0	4.4	1021.4	86.1	0
2019-01-14 04:15:00	0	0	0	4.4	1021.5	86.4	0
2019-01-14 04:30:00	0	0	0	4.5	1021.5	85.6	0
2019-01-14 04:45:00	0	0	0	4.6	1021.6	85.9	0
2019-01-14 05:00:00	0	0	0	4.6	1021.4	86.4	0
2019-01-14 05:15:00	0	0	0	4.4	1021.3	86.2	0
2019-01-14 05:30:00	0	0	0	4.3	1021.2	86.2	0
2019-01-14 05:45:00	0	0	0	4.2	1021	86	0
2019-01-14 06:00:00	0	0	0	4.2	1020.8	86	0
2019-01-14 06:15:00	0	0	0	4.2	1020.8	86.1	0
2019-01-14 06:30:00	0	0	0	4.4	1021	85.8	0
2019-01-14 06:45:00	0	0	0	4.4	1020.9	86.1	0
2019-01-14 07:00:00	0	0	0	4.5	1021	86.1	0
2019-01-14 07:15:00	0	0	0	4.3	1021.1	86	0
2019-01-14 07:30:00	4	0	3	4.3	1021.4	86.6	0.28
2019-01-14 07:45:00	16	0	12	4.3	1021.6	86.1	1.47
2019-01-14 08:00:00	53	0	35	4	1021.5	86.5	4.74
2019-01-14 08:15:00	124	0	84	4.1	1021.4	86.3	12.17
2019-01-14 08:30:00	48	0	35	4.4	1021.5	85.9	5.21
2019-01-14 08:45:00	34	0	26	4.8	1021.9	86	3.19
2019-01-14 09:00:00	48	0	35	4.7	1022.1	86.3	4.83
2019-01-14 09:15:00	50	0	37	4.7	1022.2	86.3	5.03
2019-01-14 09:30:00	83	0	61	4.9	1022.2	86.1	8.27
2019-01-14 09:45:00	98	0	71	5	1022.3	86.2	10.15
2019-01-14 10:00:00	145	0	107	5.4	1022.1	85.9	15.21
2019-01-14 10:15:00	184	0	131	5.5	1022.4	85.4	19.74
2019-01-14 10:30:00	135	0	102	5.7	1022.1	84.9	14.05
2019-01-14 10:45:00	84	0	64	5.9	1022.3	84.4	8.79
2019-01-14 11:00:00	125	0	95	5.9	1022	83.7	13.02
2019-01-14 11:15:00	177	0	129	6.1	1021.9	83.7	18.94
2019-01-14 11:30:00	145	0	109	6.3	1021.5	82.5	14.55
2019-01-14 11:45:00	105	0	80	6.4	1021.2	82.4	11.09
2019-01-14 12:00:00	102	0	76	6.4	1020.8	82.6	10.71
2019-01-14 12:15:00	62	0	45	6.5	1020.5	82.1	6.83
2019-01-14 12:30:00	59	0	45	6.4	1020.5	82.3	6.51
2019-01-14 12:45:00	72	0	53	6.5	1019.9	83.3	7.92
2019-01-14 13:00:00	64	0	47	6.4	1019.9	83.5	7.29
2019-01-14 13:15:00	88	0	65	6.5	1019.6	83.8	9.71
2019-01-14 13:30:00	82	0	62	6.4	1019.6	84.3	8.95
2019-01-14 13:45:00	71	0	54	6.6	1019.5	84.7	7.65
2019-01-14 14:00:00	66	0	50	6.8	1019.4	85.2	7.03
2019-01-14 14:15:00	65	0	46	6.7	1019.3	85.2	7.27
2019-01-14 14:30:00	34	0	25	6.6	1019.4	85.5	3.73
2019-01-14 14:45:00	32	0	23	6.5	1019.7	85.9	3.36
2019-01-14 15:00:00	38	0	28	6.1	1019.8	86.3	3.9
2019-01-14 15:15:00	38	0	28	5.9	1020.1	86.4	3.96
2019-01-14 15:30:00	30	0	22	5.9	1020.4	86.2	2.85
2019-01-14 15:45:00	25	0	19	5.7	1020.7	85.4	2.23
2019-01-14 16:00:00	23	0	17	5.9	1020.5	85	2.04
2019-01-14 16:15:00	18	0	13	5.7	1020.7	84.3	1.67
2019-01-14 16:30:00	19	0	15	5.5	1020.8	84.1	1.82
2019-01-14 16:45:00	10	0	7	5.3	1020.9	85.1	0.55
2019-01-14 17:00:00	4	0	3	5.2	1021	84.9	0.06
2019-01-14 17:15:00	1	0	1	5.2	1021	84.4	0
2019-01-14 17:30:00	0	0	0	5.1	1021	84.7	0
2019-01-14 17:45:00	0	0	0	5.1	1021.3	83.9	0
2019-01-14 18:00:00	0	0	0	5	1021.4	84.1	0
2019-01-14 18:15:00	0	0	0	4.9	1021.5	83.7	0
2019-01-14 18:30:00	0	0	0	4.9	1021.9	83.3	0
2019-01-14 18:45:00	0	0	0	4.8	1022.1	82.9	0
2019-01-14 19:00:00	0	0	0	4.9	1022.3	82.6	0
2019-01-14 19:15:00	0	0	0	4.9	1022.2	82.5	0
2019-01-14 19:30:00	0	0	0	4.7	1022.4	82.3	0
2019-01-14 19:45:00	0	0	0	4.8	1022.4	82.4	0
2019-01-14 20:00:00	0	0	0	4.7	1022.5	81.8	0
2019-01-14 20:15:00	0	0	0	4.7	1022.3	81.9	0
2019-01-14 20:30:00	0	0	0	4.7	1022.6	82	0
2019-01-14 20:45:00	0	0	0	4.8	1023	82.4	0
2019-01-14 21:00:00	0	0	0	4.7	1023.3	82.6	0
2019-01-14 21:15:00	0	0	0	4.7	1023.5	82.6	0
2019-01-14 21:30:00	0	0	0	4.7	1023.5	83	0
2019-01-14 21:45:00	0	0	0	4.8	1023.8	83.1	0
2019-01-14 22:00:00	0	0	0	4.7	1024	83	0
2019-01-14 22:15:00	0	0	0	4.5	1023.9	83.7	0
2019-01-14 22:30:00	0	0	0	4.5	1024.1	84	0
2019-01-14 22:45:00	0	0	0	4.5	1024.2	84	0
2019-01-14 23:00:00	0	0	0	4.5	1024.2	84.1	0
2019-01-14 23:15:00	0	0	0	4.5	1024.3	83.9	0
2019-01-14 23:30:00	0	0	0	4.5	1024.4	84	0
2019-01-14 23:45:00	0	0	0	4.5	1024.2	84	0
2019-01-15	0	0	0	4.4	1023.9	84.2	0
2019-01-15 00:15:00	0	0	0	4.4	1024	83.5	0
2019-01-15 00:30:00	0	0	0	4.4	1024	83.7	0
2019-01-15 00:45:00	0	0	0	4.4	1023.9	83.8	0
2019-01-15 01:00:00	0	0	0	4.5	1023.8	84.3	0
2019-01-15 01:15:00	0	0	0	4.5	1024	84.1	0
2019-01-15 01:30:00	0	0	0	4.5	1023.7	84.5	0
2019-01-15 01:45:00	0	0	0	4.4	1024	84.3	0
2019-01-15 02:00:00	0	0	0	4.4	1023.9	84.7	0
2019-01-15 02:15:00	0	0	0	4.4	1024.2	84.7	0
2019-01-15 02:30:00	0	0	0	4.4	1024.1	84.4	0
2019-01-15 02:45:00	0	0	0	4.3	1024	85	0
2019-01-15 03:00:00	0	0	0	4.3	1024.1	85.1	0
2019-01-15 03:15:00	0	0	0	4.1	1024	85	0
2019-01-15 03:30:00	0	0	0	3.9	1023.9	85	0
2019-01-15 03:45:00	0	0	0	3.9	1023.9	84.7	0
2019-01-15 04:00:00	0	0	0	3.7	1024	84.7	0
2019-01-15 04:15:00	0	0	0	3.7	1023.8	84.3	0
2019-01-15 04:30:00	0	0	0	3.5	1023.5	84.6	0
2019-01-15 04:45:00	0	0	0	3.4	1023.7	84.2	0
2019-01-15 05:00:00	0	0	0	3.2	1023.5	83.7	0
2019-01-15 05:15:00	0	0	0	3.2	1023.6	83.8	0
2019-01-15 05:30:00	0	0	0	3	1023.7	83.6	0
2019-01-15 05:45:00	0	0	0	3.1	1024	83.6	0
2019-01-15 06:00:00	0	0	0	3.2	1024.3	83	0
2019-01-15 06:15:00	0	0	0	3.5	1024.6	83.3	0
2019-01-15 06:30:00	0	0	0	3.5	1024.6	84.3	0
2019-01-15 06:45:00	0	0	0	3.7	1024.9	84.8	0
2019-01-15 07:00:00	0	0	0	3.8	1025.3	85.5	0
2019-01-15 07:15:00	0	0	0	3.9	1025.4	85.6	0
2019-01-15 07:30:00	0	0	0	3.9	1025.5	86.3	0
2019-01-15 07:45:00	3	0	3	4.1	1025.5	86	0
2019-01-15 08:00:00	10	0	8	4.1	1025.7	85.6	0.58
2019-01-15 08:15:00	17	0	13	4.1	1025.9	85.3	1.31
2019-01-15 08:30:00	19	0	14	4.4	1026	84.1	1.57
2019-01-15 08:45:00	33	0	24	4.5	1026.2	82.7	3.07
2019-01-15 09:00:00	49	0	36	4.8	1026.3	81.6	4.88
2019-01-15 09:15:00	44	0	33	5	1026.8	80.3	4.5
2019-01-15 09:30:00	49	0	37	5.1	1027.1	79.2	4.99
2019-01-15 09:45:00	44	0	33	5.2	1027.1	79.2	4.41
2019-01-15 10:00:00	59	0	45	5.2	1027.5	78	5.82
2019-01-15 10:15:00	56	0	42	5.3	1027.5	77.1	5.8
2019-01-15 10:30:00	56	0	42	5.4	1027.8	77	5.83
2019-01-15 10:45:00	53	0	40	5.3	1028	77.4	5.68
2019-01-15 11:00:00	51	0	38	5.3	1028	78.4	5.73
2019-01-15 11:15:00	56	0	42	5.3	1027.8	79.4	5.86
2019-01-15 11:30:00	45	0	34	5.2	1028	80.9	4.77
2019-01-15 11:45:00	47	0	35	4.9	1027.8	82.2	5.03
2019-01-15 12:00:00	56	0	42	4.7	1027.9	82.6	6.14
2019-01-15 12:15:00	61	0	45	4.6	1027.8	83	6.52
2019-01-15 12:30:00	62	0	46	4.5	1027.7	82.7	6.74
2019-01-15 12:45:00	50	0	38	4.3	1027.8	83.5	5.04
2019-01-15 13:00:00	63	0	47	3.9	1027.5	84.7	6.59
2019-01-15 13:15:00	61	0	46	4	1027.5	85.9	6.5
2019-01-15 13:30:00	66	0	49	3.8	1027.5	85.8	7.03
2019-01-15 13:45:00	57	0	44	3.8	1027.5	85.5	6.41
2019-01-15 14:00:00	39	0	29	3.6	1027.5	85.8	4.34
2019-01-15 14:15:00	41	0	30	3.4	1027.7	85.3	4.45
2019-01-15 14:30:00	25	0	19	3.3	1027.8	85.5	2.89
2019-01-15 14:45:00	27	0	20	3.3	1028.1	85.4	2.76
2019-01-15 15:00:00	23	0	17	3.1	1028.1	85.4	1.88
2019-01-15 15:15:00	17	0	12	3.1	1028.4	85.1	1.96
2019-01-15 15:30:00	21	0	17	3.2	1028.5	84.2	2.18
2019-01-15 15:45:00	30	0	22	3.1	1028.5	84.5	2.7
2019-01-15 16:00:00	26	0	19	3.1	1028.5	83.8	2.36
2019-01-15 16:15:00	20	0	15	3.3	1028.5	82.3	1.67
2019-01-15 16:30:00	18	0	14	3.5	1028.6	80.2	1.54
2019-01-15 16:45:00	15	0	11	3.5	1028.7	78	1.2
2019-01-15 17:00:00	5	0	5	3.7	1028.6	76.2	0.11
2019-01-15 17:15:00	3	0	2	3.6	1028.9	76.2	0
2019-01-15 17:30:00	0	0	0	3.7	1028.9	76.4	0
2019-01-15 17:45:00	0	0	0	3.8	1029	76.7	0
2019-01-15 18:00:00	0	0	0	3.8	1029	76.8	0
2019-01-15 18:15:00	0	0	0	3.8	1029.3	76.5	0
2019-01-15 18:30:00	0	0	0	3.7	1029.5	76.8	0
2019-01-15 18:45:00	0	0	0	3.7	1029.5	76.8	0
2019-01-15 19:00:00	0	0	0	3.7	1029.5	76.1	0
2019-01-15 19:15:00	0	0	0	3.8	1029.6	74.5	0
2019-01-15 19:30:00	0	0	0	3.8	1029.5	73.7	0
2019-01-15 19:45:00	0	0	0	3.9	1029.6	72	0
2019-01-15 20:00:00	0	0	0	3.8	1029.8	70.6	0
2019-01-15 20:15:00	0	0	0	3.7	1030	69.7	0
2019-01-15 20:30:00	0	0	0	3.7	1030.1	67.9	0
2019-01-15 20:45:00	0	0	0	3.6	1030.2	62.6	0
2019-01-15 21:00:00	0	0	0	3.4	1030.4	60.7	0
2019-01-15 21:15:00	0	0	0	3.3	1030.5	57.7	0
2019-01-15 21:30:00	0	0	0	3.2	1030.6	56.4	0
2019-01-15 21:45:00	0	0	0	3.1	1030.7	56.3	0
2019-01-15 22:00:00	0	0	0	3	1030.8	55.8	0
2019-01-15 22:15:00	0	0	0	2.9	1030.9	54.8	0
2019-01-15 22:30:00	0	0	0	2.7	1030.9	56	0
2019-01-15 22:45:00	0	0	0	2.5	1030.9	55.8	0
2019-01-15 23:00:00	0	0	0	2.4	1031	54.2	0
2019-01-15 23:15:00	0	0	0	2.5	1030.9	54.3	0
2019-01-15 23:30:00	0	0	0	2.2	1031.1	54.4	0
2019-01-15 23:45:00	0	0	0	2.2	1031.3	53.8	0
2019-01-16	0	0	0	2.2	1031.1	53.5	0
2019-01-16 00:15:00	0	0	0	1.8	1030.8	56.1	0
2019-01-16 00:30:00	0	0	0	1.6	1030.8	57.2	0
2019-01-16 00:45:00	0	0	0	1.2	1030.7	58	0
2019-01-16 01:00:00	0	0	0	1.2	1030.7	58	0
2019-01-16 01:15:00	0	0	0	0.9	1030.7	58	0
2019-01-16 01:30:00	0	0	0	0.8	1030.7	58.4	0
2019-01-16 01:45:00	0	0	0	0.9	1030.8	58.1	0
2019-01-16 02:00:00	0	0	0	0.8	1030.7	57.6	0
2019-01-16 02:15:00	0	0	0	0.6	1030.3	57.8	0
2019-01-16 02:30:00	0	0	0	0.3	1030.4	56.7	0
2019-01-16 02:45:00	0	0	0	0.1	1030.2	58.1	0
2019-01-16 03:00:00	0	0	0	0	1030	59.9	0
2019-01-16 03:15:00	0	0	0	-0.3	1029.9	61.3	0
2019-01-16 03:30:00	0	0	0	-0.4	1029.9	61.2	0
2019-01-16 03:45:00	0	0	0	-0.4	1029.8	60.8	0
2019-01-16 04:00:00	0	0	0	-0.3	1029.4	59.8	0
2019-01-16 04:15:00	0	0	0	-0.5	1029.3	60.5	0
2019-01-16 04:30:00	0	0	0	-0.6	1029.2	60	0
2019-01-16 04:45:00	0	0	0	-0.7	1029.1	59.5	0
2019-01-16 05:00:00	0	0	0	-0.7	1028.8	59.6	0
2019-01-16 05:15:00	0	0	0	-0.8	1028.7	60.5	0
2019-01-16 05:30:00	0	0	0	-1	1028.7	61	0
2019-01-16 05:45:00	0	0	0	-1.1	1029	61.7	0
2019-01-16 06:00:00	0	0	0	-1.2	1029.1	61.1	0
2019-01-16 06:15:00	0	0	0	-1.3	1029.4	61	0
2019-01-16 06:30:00	0	0	0	-1.4	1029.7	61.8	0
2019-01-16 06:45:00	0	0	0	-1.4	1029.7	63.8	0
2019-01-16 07:00:00	0	0	0	-1.5	1030	64.9	0
2019-01-16 07:15:00	0	0	0	-1.7	1030	66.1	0
2019-01-16 07:30:00	6	0	4	-1.9	1030	65.8	0.33
2019-01-16 07:45:00	30	0	21	-1.8	1030	63.6	2.53
2019-01-16 08:00:00	54	0	36	-1.7	1030.3	64.6	5
2019-01-16 08:15:00	100	0	64	-1.6	1030.5	64.9	9.36
2019-01-16 08:30:00	154	0	98	-1.4	1030.5	62.6	13.4
2019-01-16 08:45:00	218	0	141	-1.1	1030	61.9	21.94
2019-01-16 09:00:00	262	0	171	-0.9	1029.5	60.1	28.63
2019-01-16 09:15:00	297	0	196	-0.6	1029.5	59.1	32.08
2019-01-16 09:30:00	297	0	199	-0.1	1029.8	58.3	31.76
2019-01-16 09:45:00	215	0	144	0	1029.7	57.4	22.79
2019-01-16 10:00:00	244	0	168	0.1	1029.8	58.2	28.12
2019-01-16 10:15:00	387	0	274	0.5	1029.9	57.8	45.01
2019-01-16 10:30:00	393	0	279	0.9	1029.5	54.5	42.26
2019-01-16 10:45:00	388	0	303	1.5	1029.2	55.7	40.79
2019-01-16 11:00:00	486	0	351	1.5	1029.1	54.7	51.21
2019-01-16 11:15:00	309	0	218	1.9	1028.9	54.8	37.17
2019-01-16 11:30:00	270	0	196	2	1028.2	54.1	30.5
2019-01-16 11:45:00	293	0	208	2.4	1027.7	53.1	36.46
2019-01-16 12:00:00	246	0	174	2.5	1027.6	51.4	25.69
2019-01-16 12:15:00	266	0	187	3.1	1027.4	51.4	31.53
2019-01-16 12:30:00	216	0	145	3	1027	50.5	25.8
2019-01-16 12:45:00	320	0	227	3.6	1026.5	48.9	36.14
2019-01-16 13:00:00	320	0	231	3.9	1026	47.9	33.13
2019-01-16 13:15:00	222	0	164	4	1025.8	48.7	24.78
2019-01-16 13:30:00	197	0	143	3.9	1025.7	50.3	22.43
2019-01-16 13:45:00	243	0	176	4.1	1025.7	51.8	27.02
2019-01-16 14:00:00	482	0	358	4.4	1025.6	50.6	57.46
2019-01-16 14:15:00	282	0	205	4.7	1025.3	48.8	28.95
2019-01-16 14:30:00	359	0	267	5.3	1025.2	46.9	45.3
2019-01-16 14:45:00	472	0	354	5.7	1025.2	46.6	51.76
2019-01-16 15:00:00	442	0	327	5.7	1025.3	45.2	47.37
2019-01-16 15:15:00	432	0	314	6	1025.1	43.7	46.24
2019-01-16 15:30:00	363	0	257	6.2	1024.8	43.6	39.22
2019-01-16 15:45:00	283	0	198	6.4	1025	43.1	30.21
2019-01-16 16:00:00	251	0	174	6.2	1024.8	43.5	26.34
2019-01-16 16:15:00	205	0	140	6.5	1024.8	43.4	20.11
2019-01-16 16:30:00	158	0	107	5.7	1024.8	45	11.95
2019-01-16 16:45:00	110	0	73	5.7	1024.6	46.9	8.3
2019-01-16 17:00:00	66	0	43	5.4	1024.8	48.7	5.24
2019-01-16 17:15:00	30	0	20	5.1	1025	51.4	2.53
2019-01-16 17:30:00	6	0	5	4.6	1025.1	56.8	0.54
2019-01-16 17:45:00	0	0	0	3.9	1025.3	59.9	0
2019-01-16 18:00:00	0	0	0	3.9	1025.6	61.2	0
2019-01-16 18:15:00	0	0	0	3.1	1025.8	64.1	0
2019-01-16 18:30:00	0	0	0	3.1	1026.1	66.5	0
2019-01-16 18:45:00	0	0	0	2.8	1026	67.4	0
2019-01-16 19:00:00	0	0	0	2.9	1026.4	66.9	0
2019-01-16 19:15:00	0	0	0	2.7	1026.3	68.9	0
2019-01-16 19:30:00	0	0	0	1.3	1026.8	71.6	0
2019-01-16 19:45:00	0	0	0	1.2	1027.1	73.5	0
2019-01-16 20:00:00	0	0	0	0.9	1027.1	74.9	0
2019-01-16 20:15:00	0	0	0	0.8	1027.2	76	0
2019-01-16 20:30:00	0	0	0	0.5	1027.4	79.4	0
2019-01-16 20:45:00	0	0	0	0.4	1027.5	80.3	0
2019-01-16 21:00:00	0	0	0	-0.1	1027.5	83.5	0
2019-01-16 21:15:00	0	0	0	0	1027.7	83.9	0
2019-01-16 21:30:00	0	0	0	0	1027.9	83.9	0
2019-01-16 21:45:00	0	0	0	-0.2	1027.8	84	0
2019-01-16 22:00:00	0	0	0	-0.5	1027.6	85.8	0
2019-01-16 22:15:00	0	0	0	-0.3	1027.5	85.4	0
2019-01-16 22:30:00	0	0	0	-0.4	1027.6	86.3	0
2019-01-16 22:45:00	0	0	0	-0.7	1027.9	86.2	0
2019-01-16 23:00:00	0	0	0	-0.8	1027.7	85.8	0
2019-01-16 23:15:00	0	0	0	-1	1028	86.1	0
2019-01-16 23:30:00	0	0	0	-0.7	1028.1	85.9	0
2019-01-16 23:45:00	0	0	0	-0.8	1028	86.2	0
2019-01-17	0	0	0	-1.1	1027.9	86.3	0
2019-01-17 00:15:00	0	0	0	-1.4	1027.7	86.1	0
2019-01-17 00:30:00	0	0	0	-1.4	1027.8	86	0
2019-01-17 00:45:00	0	0	0	-1.1	1027.6	85.4	0
2019-01-17 01:00:00	0	0	0	-1.3	1027.6	85.8	0
2019-01-17 01:15:00	0	0	0	-1.5	1027.2	85.5	0
2019-01-17 01:30:00	0	0	0	-1.5	1027.5	85.5	0
2019-01-17 01:45:00	0	0	0	-1.6	1027.7	85.3	0
2019-01-17 02:00:00	0	0	0	-1.8	1027.5	85.6	0
2019-01-17 02:15:00	0	0	0	-1.5	1027.6	85.4	0
2019-01-17 02:30:00	0	0	0	-1.7	1027.5	85.1	0
2019-01-17 02:45:00	0	0	0	-2.1	1027.4	84.7	0
2019-01-17 03:00:00	0	0	0	-1.9	1027.5	84.7	0
2019-01-17 03:15:00	0	0	0	-2.2	1027.5	84.7	0
2019-01-17 03:30:00	0	0	0	-2.3	1027.8	84.9	0
2019-01-17 03:45:00	0	0	0	-2.3	1027.7	84.7	0
2019-01-17 04:00:00	0	0	0	-2.2	1027.8	84.7	0
2019-01-17 04:15:00	0	0	0	-1.9	1027.6	84.3	0
2019-01-17 04:30:00	0	0	0	-2.1	1027.5	84.4	0
2019-01-17 04:45:00	0	0	0	-2.1	1027.5	84.5	0
2019-01-17 05:00:00	0	0	0	-2.1	1027.4	84.6	0
2019-01-17 05:15:00	0	0	0	-2.2	1027.6	84.3	0
2019-01-17 05:30:00	0	0	0	-2	1027.6	84.3	0
2019-01-17 05:45:00	0	0	0	-2.4	1027.8	84.4	0
2019-01-17 06:00:00	0	0	0	-2.5	1028.1	84.3	0
2019-01-17 06:15:00	0	0	0	-2.5	1028.1	83.9	0
2019-01-17 06:30:00	0	0	0	-2.6	1028	84	0
2019-01-17 06:45:00	0	0	0	-2.2	1028.1	84.2	0
2019-01-17 07:00:00	0	0	0	-2.3	1028.1	84.2	0
2019-01-17 07:15:00	0	0	0	-2.3	1028.3	84.1	0
2019-01-17 07:30:00	4	0	3	-2.5	1028.5	84.3	0.38
2019-01-17 07:45:00	19	0	15	-2.4	1028.3	84.3	1.95
2019-01-17 08:00:00	43	0	34	-2.3	1028.1	84.2	4.62
2019-01-17 08:15:00	77	0	60	-2.3	1028	84.3	7.83
2019-01-17 08:30:00	116	0	88	-1.6	1027.9	84.2	11.57
2019-01-17 08:45:00	153	0	117	-1.1	1028	83.8	18.34
2019-01-17 09:00:00	185	0	148	-1	1027.9	84	24.14
2019-01-17 09:15:00	240	0	215	0.3	1027.9	83.9	30.26
2019-01-17 09:30:00	365	0	248	1.5	1027.6	85.2	36.3
2019-01-17 09:45:00	416	0	268	1.2	1027.7	85.6	42.15
2019-01-17 10:00:00	431	0	299	1.7	1027.6	85.6	47.1
2019-01-17 10:15:00	480	0	339	2.7	1027.4	85	52.09
2019-01-17 10:30:00	510	0	365	3.4	1027.4	84.6	55.93
2019-01-17 10:45:00	542	0	393	4.1	1027.4	83.7	59.25
2019-01-17 11:00:00	572	0	418	4.8	1027.3	78.3	62.59
2019-01-17 11:15:00	604	0	443	5.3	1027.2	73.5	65.18
2019-01-17 11:30:00	612	0	449	5.6	1027	72.2	67.13
2019-01-17 11:45:00	635	0	468	6.1	1027	69.9	68.93
2019-01-17 12:00:00	653	0	484	6.4	1026.5	67.2	69.75
2019-01-17 12:15:00	661	0	491	6.4	1026.3	66.2	70.63
2019-01-17 12:30:00	641	0	477	6.9	1026.1	66.2	70.01
2019-01-17 12:45:00	644	0	481	7.2	1025.5	64.8	71.14
2019-01-17 13:00:00	648	0	484	7.5	1025.3	64	69.92
2019-01-17 13:15:00	621	0	465	7.9	1025.2	63.6	69.12
2019-01-17 13:30:00	617	0	466	8.2	1025.2	62.2	67.56
2019-01-17 13:45:00	578	0	437	8.2	1025	61.3	65.47
2019-01-17 14:00:00	568	0	433	8.1	1024.6	61.7	63.01
2019-01-17 14:15:00	550	0	418	8.7	1024.7	58.8	58.65
2019-01-17 14:30:00	513	0	388	9.1	1024.5	59.8	55.47
2019-01-17 14:45:00	482	0	361	9.1	1024.2	58.2	51.53
2019-01-17 15:00:00	436	0	323	9.4	1024.1	58.4	46.82
2019-01-17 15:15:00	395	0	287	9.6	1024.3	57.7	41.59
2019-01-17 15:30:00	332	0	237	9.1	1024.1	57.7	34.99
2019-01-17 15:45:00	295	0	206	9.2	1024.2	59.4	30.47
2019-01-17 16:00:00	255	0	175	9	1024	58.8	25.66
2019-01-17 16:15:00	202	0	138	9.2	1024.1	57.8	19.01
2019-01-17 16:30:00	147	0	99	8.8	1024.2	59	11.89
2019-01-17 16:45:00	103	0	69	8.6	1024	61.7	8.06
2019-01-17 17:00:00	64	0	42	8.4	1023.9	61.7	5.13
2019-01-17 17:15:00	29	0	20	8.6	1023.7	61.2	2.55
2019-01-17 17:30:00	6	0	5	7.5	1023.9	64.2	0.58
2019-01-17 17:45:00	0	0	0	7.1	1023.8	67.7	0
2019-01-17 18:00:00	0	0	0	6.6	1023.9	71	0
2019-01-17 18:15:00	0	0	0	6.2	1024	73.1	0
2019-01-17 18:30:00	0	0	0	5.2	1024	77.1	0
2019-01-17 18:45:00	0	0	0	4.6	1023.7	78.6	0
2019-01-17 19:00:00	0	0	0	4.5	1024	79.7	0
2019-01-17 19:15:00	0	0	0	3.9	1024	80.8	0
2019-01-17 19:30:00	0	0	0	3.5	1024.3	81.4	0
2019-01-17 19:45:00	0	0	0	3	1024.3	81.9	0
2019-01-17 20:00:00	0	0	0	3.2	1024.7	83.6	0
2019-01-17 20:15:00	0	0	0	3.2	1025	83.5	0
2019-01-17 20:30:00	0	0	0	2.6	1025.1	84.7	0
2019-01-17 20:45:00	0	0	0	2.2	1025.3	85	0
2019-01-17 21:00:00	0	0	0	1.9	1025.3	85.6	0
2019-01-17 21:15:00	0	0	0	1.5	1025.2	85.3	0
2019-01-17 21:30:00	0	0	0	1.3	1025.2	85.4	0
2019-01-17 21:45:00	0	0	0	1.3	1025.3	84.7	0
2019-01-17 22:00:00	0	0	0	1.2	1025.3	84.7	0
2019-01-17 22:15:00	0	0	0	0.9	1025.5	84.3	0
2019-01-17 22:30:00	0	0	0	1	1025.5	84.1	0
2019-01-17 22:45:00	0	0	0	1	1025.7	83.9	0
2019-01-17 23:00:00	0	0	0	1.1	1025.6	83.6	0
2019-01-17 23:15:00	0	0	0	0.9	1025.7	83.7	0
2019-01-17 23:30:00	0	0	0	0.9	1025.4	83.7	0
2019-01-17 23:45:00	0	0	0	0.3	1025.4	83.8	0
2019-01-18	0	0	0	0.3	1025.3	83.7	0
2019-01-18 00:15:00	0	0	0	0.2	1025.2	83.5	0
2019-01-18 00:30:00	0	0	0	-0.2	1024.9	83.5	0
2019-01-18 00:45:00	0	0	0	0	1024.8	82.9	0
2019-01-18 01:00:00	0	0	0	0	1024.8	82.3	0
2019-01-18 01:15:00	0	0	0	-0.1	1024.8	82.9	0
2019-01-18 01:30:00	0	0	0	-0.1	1024.5	82.4	0
2019-01-18 01:45:00	0	0	1	0	1024.6	82	0
2019-01-18 02:00:00	0	0	0	0.1	1024.3	82.2	0
2019-01-18 02:15:00	0	0	0	-0.1	1024.1	82.5	0
2019-01-18 02:30:00	0	0	0	0	1024	81.9	0
2019-01-18 02:45:00	0	0	0	-0.5	1024	82.3	0
2019-01-18 03:00:00	0	0	0	-0.7	1023.9	82.2	0
2019-01-18 03:15:00	0	0	0	-0.7	1023.9	82.1	0
2019-01-18 03:30:00	0	0	0	-0.5	1023.6	81.9	0
2019-01-18 03:45:00	0	0	0	-0.6	1023.6	81.6	0
2019-01-18 04:00:00	0	0	0	-0.6	1023.2	81.5	0
2019-01-18 04:15:00	0	0	0	-0.6	1022.8	81.1	0
2019-01-18 04:30:00	0	0	0	-0.7	1022.8	81.3	0
2019-01-18 04:45:00	0	0	0	-0.9	1022.6	81.3	0
2019-01-18 05:00:00	0	0	0	-0.9	1022.5	81.4	0
2019-01-18 05:15:00	0	0	0	-1	1022.5	81.6	0
2019-01-18 05:30:00	0	0	0	-1.1	1022.4	81.7	0
2019-01-18 05:45:00	0	0	0	-0.9	1022.5	81.4	0
2019-01-18 06:00:00	0	0	0	-1.3	1022.4	81.6	0
2019-01-18 06:15:00	0	0	0	-1.1	1022.3	81.4	0
2019-01-18 06:30:00	0	0	0	-1.1	1022.4	81.2	0
2019-01-18 06:45:00	0	0	0	-1.1	1022.8	81.4	0
2019-01-18 07:00:00	0	0	0	-1.1	1022.9	81.2	0
2019-01-18 07:15:00	0	0	0	-0.9	1022.7	81	0
2019-01-18 07:30:00	5	0	5	-1	1023.1	81.4	0.53
2019-01-18 07:45:00	26	0	21	-1.1	1023.4	80.9	2.31
2019-01-18 08:00:00	56	0	44	-1.2	1023.3	81.2	5.14
2019-01-18 08:15:00	93	0	73	-0.9	1023.5	80.9	8.17
2019-01-18 08:30:00	139	0	111	-0.8	1023	80.9	12.38
2019-01-18 08:45:00	200	0	160	0.1	1023.3	80.2	22.83
2019-01-18 09:00:00	320	0	200	0.9	1023.1	79.8	30.55
2019-01-18 09:15:00	350	0	222	1.7	1023	79.5	37.5
2019-01-18 09:30:00	385	0	268	2.7	1022.8	79.5	43.54
2019-01-18 09:45:00	435	0	308	4.1	1022.7	81.1	48.63
2019-01-18 10:00:00	479	0	343	3.8	1022.6	83.8	53.31
2019-01-18 10:15:00	520	0	375	4.4	1022.4	84.8	56.76
2019-01-18 10:30:00	563	0	410	4.8	1022	85.2	61.7
2019-01-18 10:45:00	595	0	440	6	1021.9	83.8	65.65
2019-01-18 11:00:00	618	0	460	6.8	1021.4	80.9	67.64
2019-01-18 11:15:00	632	0	469	8	1021.4	73.9	68.51
2019-01-18 11:30:00	637	0	473	8.1	1021	71.7	68.47
2019-01-18 11:45:00	630	0	466	8.1	1020.7	73.1	68.55
2019-01-18 12:00:00	667	0	496	9	1020.2	69.9	72.55
2019-01-18 12:15:00	686	0	514	9.5	1019.6	67.2	74.95
2019-01-18 12:30:00	682	0	513	9.7	1019	67.1	74.07
2019-01-18 12:45:00	678	0	511	10.4	1018.7	65.7	75.04
2019-01-18 13:00:00	698	0	533	11.3	1018.2	63	77.46
2019-01-18 13:15:00	693	0	530	11.6	1017.8	58.2	76.9
2019-01-18 13:30:00	652	0	497	11.8	1017.5	60.2	73.11
2019-01-18 13:45:00	627	0	476	12	1017.2	59.9	69.94
2019-01-18 14:00:00	571	0	429	11.3	1017.1	64.8	63.46
2019-01-18 14:15:00	541	0	407	10.7	1017.1	66.8	58.06
2019-01-18 14:30:00	507	0	379	10.7	1017	68	55.77
2019-01-18 14:45:00	459	0	338	10.3	1017.2	69.6	50.56
2019-01-18 15:00:00	367	0	265	10	1017.1	70.8	40.85
2019-01-18 15:15:00	371	0	267	9.9	1017.1	71.4	37.81
2019-01-18 15:30:00	285	0	197	9.2	1017	72.4	31.6
2019-01-18 15:45:00	104	0	72	9.2	1016.9	73.6	10.05
2019-01-18 16:00:00	48	0	35	8.7	1017.2	75.5	4.76
2019-01-18 16:15:00	23	0	17	8.2	1017.5	77.1	1.98
2019-01-18 16:30:00	20	0	15	7.9	1017.6	77.7	1.68
2019-01-18 16:45:00	19	0	14	7.7	1017.5	79.1	1.48
2019-01-18 17:00:00	20	0	15	7.4	1017.4	79.5	1.54
2019-01-18 17:15:00	10	0	8	7.2	1017.2	80.1	0.57
2019-01-18 17:30:00	7	0	5	7	1017.2	80.3	0.14
2019-01-18 17:45:00	0	0	0	6.9	1017.2	81.6	0
2019-01-18 18:00:00	0	0	0	6.8	1017.2	80.9	0
2019-01-18 18:15:00	0	0	0	6.1	1017.1	82.8	0
2019-01-18 18:30:00	0	0	0	6.2	1017.4	82.7	0
2019-01-18 18:45:00	0	0	0	6.2	1017.8	82.7	0
2019-01-18 19:00:00	0	0	0	6.1	1018	82.6	0
2019-01-18 19:15:00	0	0	0	6	1018.1	83.1	0
2019-01-18 19:30:00	0	0	0	6.1	1018.1	82.5	0
2019-01-18 19:45:00	0	0	0	6.1	1018.6	82.4	0
2019-01-18 20:00:00	0	0	0	6.1	1018.8	82.4	0
2019-01-18 20:15:00	0	0	0	6	1019	82	0
2019-01-18 20:30:00	0	0	0	5.7	1019	83	0
2019-01-18 20:45:00	0	0	0	5.7	1018.9	83.5	0
2019-01-18 21:00:00	0	0	0	5.7	1019	84.4	0
2019-01-18 21:15:00	0	0	0	5.6	1019.1	84.6	0
2019-01-18 21:30:00	0	0	0	5.6	1019.4	84.3	0
2019-01-18 21:45:00	0	0	0	5.6	1019.5	84.4	0
2019-01-18 22:00:00	0	0	0	5.7	1019.5	84.2	0
2019-01-18 22:15:00	0	0	0	5.8	1019.5	84.4	0
2019-01-18 22:30:00	0	0	0	5.7	1019.8	84.6	0
2019-01-18 22:45:00	0	0	0	5.8	1019.8	84.4	0
2019-01-18 23:00:00	0	0	0	5.7	1020	84.7	0
2019-01-18 23:15:00	0	0	0	5.9	1020	84.6	0
2019-01-18 23:30:00	0	0	0	5.7	1019.8	84.6	0
2019-01-18 23:45:00	0	0	0	5.7	1020	84.6	0
2019-01-19	0	0	0	5.9	1020	84.6	0
2019-01-19 00:15:00	0	0	0	5.6	1019.9	85	0
2019-01-19 00:30:00	0	0	0	5.8	1019.6	85.1	0
2019-01-19 00:45:00	0	0	0	5.6	1019.5	84.8	0
2019-01-19 01:00:00	0	0	0	5.4	1019.5	85.1	0
2019-01-19 01:15:00	0	0	0	5.4	1019.5	85.2	0
2019-01-19 01:30:00	0	0	0	5.2	1019.5	85.6	0
2019-01-19 01:45:00	0	0	0	5.2	1019.4	85.5	0
2019-01-19 02:00:00	0	0	0	5.2	1019.5	85.4	0
2019-01-19 02:15:00	0	0	0	5.1	1019.4	85.5	0
2019-01-19 02:30:00	0	0	0	5	1019.4	84.9	0
2019-01-19 02:45:00	0	0	0	5.1	1019.1	85.2	0
2019-01-19 03:00:00	0	0	0	5.1	1019.2	84.6	0
2019-01-19 03:15:00	0	0	0	4.9	1019.4	85.1	0
2019-01-19 03:30:00	0	0	0	4.9	1019.3	84.6	0
2019-01-19 03:45:00	0	0	0	5	1019.2	84.7	0
2019-01-19 04:00:00	0	0	0	4.9	1019.3	84.2	0
2019-01-19 04:15:00	0	0	0	4.8	1019	83.8	0
2019-01-19 04:30:00	0	0	0	4.9	1018.9	83.9	0
2019-01-19 04:45:00	0	0	0	4.7	1018.9	84	0
2019-01-19 05:00:00	0	0	0	4.8	1018.5	83.5	0
2019-01-19 05:15:00	0	0	0	4.6	1018.6	83.4	0
2019-01-19 05:30:00	0	0	0	4.5	1018.8	83.3	0
2019-01-19 05:45:00	0	0	0	4.6	1019.1	83	0
2019-01-19 06:00:00	0	0	0	4.9	1019.4	82.7	0
2019-01-19 06:15:00	0	0	0	4.9	1019.4	82.8	0
2019-01-19 06:30:00	0	0	0	4.9	1019.6	82.7	0
2019-01-19 06:45:00	0	0	0	4.7	1019.8	82.6	0
2019-01-19 07:00:00	0	0	0	5.1	1019.9	82.8	0
2019-01-19 07:15:00	0	0	0	5.3	1020.3	83.1	0
2019-01-19 07:30:00	1	0	1	5.2	1020.2	83.2	0
2019-01-19 07:45:00	5	0	4	5	1020.2	83.7	0.08
2019-01-19 08:00:00	12	0	9	5	1020.2	83.6	0.77
2019-01-19 08:15:00	20	0	15	5.1	1020.3	83.6	1.51
2019-01-19 08:30:00	24	0	18	5.5	1020.1	84	1.91
2019-01-19 08:45:00	33	0	25	5.7	1020.4	84.2	3.08
2019-01-19 09:00:00	39	0	29	6	1020.5	84.7	3.63
2019-01-19 09:15:00	43	0	32	6.2	1020.6	84.9	4.16
2019-01-19 09:30:00	49	0	36	6.3	1020.6	84.6	4.75
2019-01-19 09:45:00	67	0	49	6.4	1020.6	84.1	6.87
2019-01-19 10:00:00	72	0	53	6.6	1020.8	83.7	7.23
2019-01-19 10:15:00	101	0	74	6.8	1020.7	82.8	10.43
2019-01-19 10:30:00	89	0	66	7.1	1020.8	82	9.24
2019-01-19 10:45:00	84	0	62	7.2	1020.9	81	8.94
2019-01-19 11:00:00	66	0	49	7.3	1020.7	80.5	7.22
2019-01-19 11:15:00	69	0	51	7.1	1020.7	80.1	6.7
2019-01-19 11:30:00	74	0	55	7.3	1020.4	80.7	7.77
2019-01-19 11:45:00	68	0	50	7.1	1020.4	81.4	7.42
2019-01-19 12:00:00	84	0	62	7	1020.3	81.1	9.02
2019-01-19 12:15:00	84	0	62	7.1	1020	80.9	8.91
2019-01-19 12:30:00	86	0	64	7	1019.9	80.7	9.17
2019-01-19 12:45:00	88	0	65	7.3	1019.5	80.8	9.35
2019-01-19 13:00:00	91	0	67	7.4	1019.2	80.5	9.6
2019-01-19 13:15:00	77	0	57	7.5	1019	80.4	8.33
2019-01-19 13:30:00	90	0	66	7.5	1019.1	79.8	9.53
2019-01-19 13:45:00	102	0	75	7.6	1018.9	79.5	10.43
2019-01-19 14:00:00	88	0	65	7.5	1018.9	79.3	9.12
2019-01-19 14:15:00	77	0	57	7.4	1018.9	78.8	8.03
2019-01-19 14:30:00	57	0	42	7.5	1018.9	79.2	6.24
2019-01-19 14:45:00	55	0	41	7.5	1018.8	78.8	5.65
2019-01-19 15:00:00	54	0	39	7.3	1018.7	77.5	5.52
2019-01-19 15:15:00	35	0	26	7.2	1018.7	76.3	3.64
2019-01-19 15:30:00	30	0	22	7.1	1018.9	76.2	2.82
2019-01-19 15:45:00	31	0	23	7.1	1018.9	76.5	2.84
2019-01-19 16:00:00	25	0	19	7.2	1019	76.1	2.32
2019-01-19 16:15:00	24	0	18	7.1	1019.1	76.5	2.1
2019-01-19 16:30:00	17	0	12	7.1	1019.4	76.4	1.31
2019-01-19 16:45:00	11	0	8	7	1019.6	75.3	0.71
2019-01-19 17:00:00	6	0	5	6.9	1019.7	75.4	0.2
2019-01-19 17:15:00	2	0	2	7	1019.6	75.2	0
2019-01-19 17:30:00	0	0	0	6.8	1019.7	75.5	0
2019-01-19 17:45:00	0	0	0	6.8	1019.9	75.7	0
2019-01-19 18:00:00	0	0	0	6.7	1020.2	76.1	0
2019-01-19 18:15:00	0	0	0	6.6	1020.3	76.6	0
2019-01-19 18:30:00	0	0	0	6.6	1020.5	76.9	0
2019-01-19 18:45:00	0	0	0	6.6	1020.7	77.4	0
2019-01-19 19:00:00	0	0	0	6.6	1020.9	76.8	0
2019-01-19 19:15:00	0	0	0	6.5	1021.2	76.5	0
2019-01-19 19:30:00	0	0	0	6.5	1021.5	76.2	0
2019-01-19 19:45:00	0	0	0	6.5	1021.7	77	0
2019-01-19 20:00:00	0	0	0	6.4	1021.9	76.9	0
2019-01-19 20:15:00	0	0	0	6.3	1022.1	77.5	0
2019-01-19 20:30:00	0	0	0	6.2	1022.3	77.9	0
2019-01-19 20:45:00	0	0	0	6.2	1022.6	78	0
2019-01-19 21:00:00	0	0	0	6.1	1022.9	78.3	0
2019-01-19 21:15:00	0	0	0	6.2	1023.2	78.3	0
2019-01-19 21:30:00	0	0	0	5.9	1023.5	79.3	0
2019-01-19 21:45:00	0	0	0	5.9	1023.7	80.1	0
2019-01-19 22:00:00	0	0	0	5.7	1024	80.4	0
2019-01-19 22:15:00	0	0	0	5.8	1024	79.4	0
2019-01-19 22:30:00	0	0	0	5.7	1024.3	79.5	0
2019-01-19 22:45:00	0	0	0	5.5	1024.3	79.9	0
2019-01-19 23:00:00	0	0	0	5.4	1024.5	80.1	0
2019-01-19 23:15:00	0	0	0	5.3	1024.7	80.1	0
2019-01-19 23:30:00	0	0	0	5.2	1024.5	80.7	0
2019-01-19 23:45:00	0	0	0	5.1	1024.9	80.8	0
2019-01-20	0	0	0	5	1024.8	81.4	0
2019-01-20 00:15:00	0	0	0	5	1025	81.3	0
2019-01-20 00:30:00	0	0	0	4.9	1025	81.8	0
2019-01-20 00:45:00	0	0	0	4.7	1025.1	81.9	0
2019-01-20 01:00:00	0	0	0	4.5	1025.2	82.9	0
2019-01-20 01:15:00	0	0	0	4.3	1025.2	83.6	0
2019-01-20 01:30:00	0	0	0	4.2	1025.5	84.3	0
2019-01-20 01:45:00	0	0	0	4.1	1025.6	84	0
2019-01-20 02:00:00	0	0	0	3.9	1025.6	84.4	0
2019-01-20 02:15:00	0	0	0	3.6	1026	84.3	0
2019-01-20 02:30:00	0	0	0	3.6	1026.2	84.9	0
2019-01-20 02:45:00	0	0	0	3.5	1026.5	85.1	0
2019-01-20 03:00:00	0	0	0	3.3	1026.4	85.5	0
2019-01-20 03:15:00	0	0	0	3.2	1026.7	85.8	0
2019-01-20 03:30:00	0	0	0	3.2	1026.8	85.9	0
2019-01-20 03:45:00	0	0	0	3.3	1026.7	85.4	0
2019-01-20 04:00:00	0	0	0	3.4	1026.7	85.5	0
2019-01-20 04:15:00	0	0	0	3.5	1026.4	85.3	0
2019-01-20 04:30:00	0	0	0	3.6	1026.4	85.5	0
2019-01-20 04:45:00	0	0	0	3.7	1026.8	85.6	0
2019-01-20 05:00:00	0	0	0	3.6	1026.6	85.3	0
2019-01-20 05:15:00	0	0	0	3.6	1026.6	85.2	0
2019-01-20 05:30:00	0	0	0	3.5	1026.6	85.2	0
2019-01-20 05:45:00	0	0	0	3.5	1026.5	85	0
2019-01-20 06:00:00	0	0	0	3.6	1026.6	85	0
2019-01-20 06:15:00	0	0	0	3.3	1026.6	84.9	0
2019-01-20 06:30:00	0	0	0	3.3	1026.6	85	0
2019-01-20 06:45:00	0	0	0	3.1	1026.7	84.9	0
2019-01-20 07:00:00	0	0	0	2.9	1026.9	85.2	0
2019-01-20 07:15:00	0	0	0	2.8	1027.3	85.4	0
2019-01-20 07:30:00	6	0	5	2.7	1027.3	84.7	0.44
2019-01-20 07:45:00	19	0	15	2.6	1027.5	85	1.55
2019-01-20 08:00:00	45	0	32	2.3	1027.5	85.2	4.12
2019-01-20 08:15:00	51	0	36	2.3	1027.8	85.3	4.82
2019-01-20 08:30:00	105	0	70	2.5	1028	85.1	9.71
2019-01-20 08:45:00	143	0	95	2.7	1028.3	84.2	13.57
2019-01-20 09:00:00	190	0	127	2.9	1028.5	83.9	18.16
2019-01-20 09:15:00	252	0	169	3.2	1028.8	82.5	24.37
2019-01-20 09:30:00	202	0	137	3.5	1029	80.7	20.42
2019-01-20 09:45:00	271	0	187	3.9	1029.3	79.5	26.92
2019-01-20 10:00:00	286	0	226	4.3	1029.5	77.5	34.05
2019-01-20 10:15:00	347	240	240	4.6	1029.5	75.9	40.84
2019-01-20 10:30:00	325	197	228	4.7	1029.5	76	31.68
2019-01-20 10:45:00	329	269	230	4.9	1029.4	76.3	37.75
2019-01-20 11:00:00	446	342	319	5.6	1029.3	72.7	46.61
2019-01-20 11:15:00	572	431	412	6.1	1029.4	69.9	58.07
2019-01-20 11:30:00	399	345	286	6.6	1029.2	66.8	46.48
2019-01-20 11:45:00	571	453	417	6.8	1028.8	65.4	58.14
2019-01-20 12:00:00	367	335	265	7.5	1028.9	63.1	38.16
2019-01-20 12:15:00	593	449	437	7.8	1028.5	59.3	56.73
2019-01-20 12:30:00	680	529	505	8	1028	56.6	69.33
2019-01-20 12:45:00	588	450	432	8.6	1027.5	57.1	64.96
2019-01-20 13:00:00	603	465	448	9.2	1027.5	47.3	68.71
2019-01-20 13:15:00	604	480	448	9.5	1027	44.3	69.25
2019-01-20 13:30:00	567	453	425	9.6	1026.7	43.7	62.2
2019-01-20 13:45:00	577	466	436	9.8	1026.7	38.8	53.24
2019-01-20 14:00:00	591	479	452	9.6	1026.4	36.5	65.94
2019-01-20 14:15:00	554	466	430	9.9	1026.2	34.3	60.02
2019-01-20 14:30:00	537	446	417	10	1026.3	28.3	60.57
2019-01-20 14:45:00	205	226	153	10.1	1026.1	30.8	20.15
2019-01-20 15:00:00	264	298	192	10.2	1026.1	32.1	37.63
2019-01-20 15:15:00	389	347	289	10.4	1026.2	32	41.79
2019-01-20 15:30:00	323	302	235	10.1	1026.1	37.7	33.78
2019-01-20 15:45:00	159	209	114	8.9	1026.5	41	19.12
2019-01-20 16:00:00	149	185	106	8.6	1026.6	42.2	14.63
2019-01-20 16:15:00	72	135	53	8.3	1026.4	44.1	7.03
2019-01-20 16:30:00	52	129	38	8.1	1026.6	47.5	4.9
2019-01-20 16:45:00	31	122	23	7.7	1026.7	49.8	2.81
2019-01-20 17:00:00	26	119	19	7.4	1027	52.1	2.15
2019-01-20 17:15:00	18	116	13	7.3	1027.3	53.6	1.36
2019-01-20 17:30:00	4	111	3	7	1027.3	54.2	0.12
2019-01-20 17:45:00	0	117	0	7	1027.6	56.3	0
2019-01-20 18:00:00	0	148	0	6.8	1027.7	58.1	0
2019-01-20 18:15:00	0	138	0	6.7	1027.6	59.7	0
2019-01-20 18:30:00	0	132	0	6.7	1028	59.1	0
2019-01-20 18:45:00	0	137	0	6.5	1028.1	60	0
2019-01-20 19:00:00	0	134	0	6.4	1028.4	59.9	0
2019-01-20 19:15:00	0	144	0	6.4	1028.5	60.3	0
2019-01-20 19:30:00	0	135	0	6.3	1028.6	60.9	0
2019-01-20 19:45:00	0	137	0	6.2	1028.9	61.3	0
2019-01-20 20:00:00	0	125	0	6.1	1029	61.8	0
2019-01-20 20:15:00	0	131	0	6	1029.3	61.9	0
2019-01-20 20:30:00	0	127	0	6	1029.3	61.7	0
2019-01-20 20:45:00	0	131	0	5.8	1029.3	62.4	0
2019-01-20 21:00:00	0	145	0	5.7	1029.5	64.7	0
2019-01-20 21:15:00	0	135	0	5.5	1029.7	66.2	0
2019-01-20 21:30:00	0	127	0	5.4	1029.6	66.8	0
2019-01-20 21:45:00	0	128	0	5.4	1029.7	67.7	0
2019-01-20 22:00:00	0	133	0	5.4	1029.7	67.2	0
2019-01-20 22:15:00	0	127	0	5.3	1029.8	66.6	0
2019-01-20 22:30:00	0	131	0	5.4	1029.8	65.9	0
2019-01-20 22:45:00	0	128	0	5.4	1029.7	65.1	0
2019-01-20 23:00:00	0	122	0	5.2	1029.7	66.4	0
2019-01-20 23:15:00	0	125	0	5.3	1029.6	67	0
2019-01-20 23:30:00	0	124	0	5	1029.5	67.6	0
2019-01-20 23:45:00	0	127	0	5	1029.5	68.7	0
2019-01-21	0	121	0	4.9	1029.5	68.8	0
2019-01-21 00:15:00	0	125	0	4.8	1029.3	69.3	0
2019-01-21 00:30:00	0	125	0	4.8	1029.2	69.1	0
2019-01-21 00:45:00	0	128	0	4.9	1029.1	69.7	0
2019-01-21 01:00:00	0	122	0	4.7	1029	69.7	0
2019-01-21 01:15:00	0	111	0	4.6	1029	70.5	0
2019-01-21 01:30:00	0	121	0	4.5	1029.2	70.5	0
2019-01-21 01:45:00	0	127	0	4.3	1029.1	70.9	0
2019-01-21 02:00:00	0	115	0	4.2	1029.1	71	0
2019-01-21 02:15:00	0	118	0	4.3	1029.2	70.7	0
2019-01-21 02:30:00	0	117	0	4.3	1029	70.9	0
2019-01-21 02:45:00	0	131	0	4.3	1029	70.1	0
2019-01-21 03:00:00	0	115	0	4.3	1028.9	69.5	0
2019-01-21 03:15:00	0	120	0	4.2	1028.9	69	0
2019-01-21 03:30:00	0	121	0	4.3	1028.7	68.5	0
2019-01-21 03:45:00	0	113	0	4.1	1028.4	68.5	0
2019-01-21 04:00:00	0	112	0	4.1	1028.2	67.9	0
2019-01-21 04:15:00	0	115	0	4	1028	68.2	0
2019-01-21 04:30:00	0	122	0	3.9	1028	68.1	0
2019-01-21 04:45:00	0	104	0	3.8	1027.7	69.1	0
2019-01-21 05:00:00	0	117	0	3.6	1027.5	69.7	0
2019-01-21 05:15:00	0	112	0	3.6	1027.5	70.9	0
2019-01-21 05:30:00	0	112	0	3.5	1027.8	72.6	0
2019-01-21 05:45:00	0	113	0	3.7	1027.7	70.8	0
2019-01-21 06:00:00	0	110	0	3.6	1027.8	70.8	0
2019-01-21 06:15:00	0	121	0	3.5	1027.7	71.8	0
2019-01-21 06:30:00	0	105	0	3.1	1027.8	73	0
2019-01-21 06:45:00	0	101	0	2.6	1027.7	73.7	0
2019-01-21 07:00:00	0	74	0	2.4	1027.6	74.5	0
2019-01-21 07:15:00	0	128	0	2.3	1027.9	74.2	0
2019-01-21 07:30:00	6	139	5	2.2	1028.1	74.7	0.53
2019-01-21 07:45:00	20	146	15	1.7	1028.2	75.5	1.72
2019-01-21 08:00:00	74	212	47	2	1028.2	75.8	6.85
2019-01-21 08:15:00	86	205	55	2.5	1028.3	74.1	6.85
2019-01-21 08:30:00	126	219	82	2.9	1028.5	73	10.83
2019-01-21 08:45:00	184	236	121	3.2	1028.6	71.7	17.81
2019-01-21 09:00:00	205	237	135	3.7	1028.8	69.2	20.78
2019-01-21 09:15:00	259	258	174	4	1028.7	69.6	26.21
2019-01-21 09:30:00	333	266	228	4.5	1028.7	67.2	36.66
2019-01-21 09:45:00	230	236	161	4.7	1028.5	64.4	25.16
2019-01-21 10:00:00	283	275	197	5	1028.6	63.1	29.15
2019-01-21 10:15:00	351	309	252	5.5	1028.7	62.5	33.99
2019-01-21 10:30:00	384	361	282	5.2	1028.9	65.2	38.42
2019-01-21 10:45:00	577	453	427	5.9	1028.6	60.5	61.46
2019-01-21 11:00:00	559	402	417	6.5	1028.3	51.6	61.6
2019-01-21 11:15:00	629	481	470	7.3	1028.1	47.3	67.53
2019-01-21 11:30:00	636	476	475	7.6	1027.7	43.8	67.31
2019-01-21 11:45:00	613	494	462	8.1	1027.3	39.8	67.16
2019-01-21 12:00:00	726	554	553	8.3	1026.9	36.6	76.68
2019-01-21 12:15:00	725	566	554	9.5	1026.4	32.1	76.58
2019-01-21 12:30:00	735	569	561	9.8	1026.1	28.2	77.36
2019-01-21 12:45:00	711	556	543	10.1	1025.6	27.7	76.75
2019-01-21 13:00:00	702	561	535	10	1025.1	30.3	75.04
2019-01-21 13:15:00	688	550	526	10.4	1024.9	29.2	71.55
2019-01-21 13:30:00	621	512	475	10.6	1024.6	29.7	67.53
2019-01-21 13:45:00	626	523	483	10.7	1024.5	28.3	67.6
2019-01-21 14:00:00	624	520	484	10.5	1023.9	28.2	65.3
2019-01-21 14:15:00	532	421	408	10.7	1023.5	26.3	52.37
2019-01-21 14:30:00	462	323	350	10.5	1023.3	30.8	45.37
2019-01-21 14:45:00	412	357	311	10.9	1023	31.7	44.07
2019-01-21 15:00:00	461	411	348	11	1023	29.6	47.9
2019-01-21 15:15:00	398	345	293	11.1	1022.8	25.9	38.39
2019-01-21 15:30:00	375	315	274	11.2	1022.6	26.3	38.4
2019-01-21 15:45:00	317	276	227	10.9	1022.5	25.4	32.72
2019-01-21 16:00:00	258	235	181	10.9	1022.6	27.6	26.01
2019-01-21 16:15:00	194	190	134	10.7	1022.4	30.1	19.11
2019-01-21 16:30:00	145	163	100	10.5	1022.4	30.5	12.69
2019-01-21 16:45:00	99	133	68	10.4	1022.5	33.1	7.83
2019-01-21 17:00:00	62	110	42	9.9	1022.8	34.9	5.02
2019-01-21 17:15:00	32	95	22	9.5	1022.9	38	2.71
2019-01-21 17:30:00	10	84	7	8.9	1023.1	41.2	0.81
2019-01-21 17:45:00	0	77	0	8.3	1023.3	42.6	0
2019-01-21 18:00:00	0	85	0	7.4	1023.3	45.7	0
2019-01-21 18:15:00	0	100	0	7.1	1023.4	46.8	0
2019-01-21 18:30:00	0	101	0	6.8	1023.5	48.3	0
2019-01-21 18:45:00	0	130	0	7.1	1023.6	51.2	0
2019-01-21 19:00:00	0	176	0	6.3	1023.8	55.9	0
2019-01-21 19:15:00	0	128	0	6.1	1023.9	54.5	0
2019-01-21 19:30:00	0	125	0	6.5	1024.1	52.3	0
[truncated: 68,177 more rows]
