# Supplementary material
Source: PeerJ journal article supplement (doi:10.7717/peerj-cs.3610)
Supplement: Solar_station_site_6_Nominal_capacity35MW.xlsx [file Solar_station_site_6_Nominal_capacity35MW.xlsx]

## Sheet: Sheet1
Time(year-month-day h:m:s)	Total solar irradiance (W/m2)	Direct normal irradiance (W/m2)	Global horizontal irradiance (W/m2)	Air temperature (°C)	Atmosphere (hpa)	Relative humidity (%)	Power (MW)
2019-01-01	0	0	0	11.9	837.2	53.06	0
2019-01-01 00:15:00	0	0	0	11.6	837.253	54.76	0
2019-01-01 00:30:00	0	0	0	11.36	837.213	57.16	0
2019-01-01 00:45:00	0	0	0	11.3133	837.2	58.7333	0
2019-01-01 01:00:00	0	0	0	11.26	837.093	59.9333	0
2019-01-01 01:15:00	0	0	0	10.9333	836.947	62.1133	0
2019-01-01 01:30:00	0	0	0	10.9	836.813	62.2133	0
2019-01-01 01:45:00	0	0	0	10.46	836.8	63.98	0
2019-01-01 02:00:00	0	0	0	10.0267	836.733	65.18	0
2019-01-01 02:15:00	0	0	0	10.16	836.853	66.08	0
2019-01-01 02:30:00	0	0	0	10.58	836.92	66.2667	0
2019-01-01 02:45:00	0	0	0	10.3933	837	67.6133	0
2019-01-01 03:00:00	0	0	0	10.1733	837	68.1067	0
2019-01-01 03:15:00	0	0	0	9.4	837	71.1467	0
2019-01-01 03:30:00	0	0	0	9.10667	837.02	71.42	0
2019-01-01 03:45:00	0	0	0	9.06667	837.1	72.0733	0
2019-01-01 04:00:00	0	0	0	9.60667	837.013	72.1067	0
2019-01-01 04:15:00	0	0	0	9.34	837	72.48	0
2019-01-01 04:30:00	0	0	0	8.95333	836.893	73.7867	0
2019-01-01 04:45:00	0	0	0	9.24667	836.853	73.4933	0
2019-01-01 05:00:00	0	0	0	9.85333	836.727	71.2533	0
2019-01-01 05:15:00	0	0	0	9.72	836.647	71.3667	0
2019-01-01 05:30:00	0	0	0	9.32	836.513	72.9733	0
2019-01-01 05:45:00	0	0	0	9.17333	836.553	74.4667	0
2019-01-01 06:00:00	0	0	0	9.03333	836.533	74.8267	0
2019-01-01 06:15:00	0	0	0	8.80667	836.707	76.6	0
2019-01-01 06:30:00	0	0	0	8.81333	836.82	76.8333	0
2019-01-01 06:45:00	0	0	0	8.57333	836.953	78.0333	0
2019-01-01 07:00:00	0	0	0	8.18	837.107	79.3467	0
2019-01-01 07:15:00	0	0	0	8.36	837.36	79.8667	0
2019-01-01 07:30:00	0	0	0	8.71333	837.673	79.9867	0
2019-01-01 07:45:00	0	0	0	9.27333	837.753	78.7333	0
2019-01-01 08:00:00	0	0	0	9.06667	837.993	79.5533	0
2019-01-01 08:15:00	3.93333	0.866667	1.06667	9.05333	838.153	80.2067	0.064
2019-01-01 08:30:00	50.2667	14.4	17.2667	9.16	838.393	80.1267	0.767333
2019-01-01 08:45:00	183.133	111.467	54	9.61333	838.553	78.94	2.586
2019-01-01 09:00:00	288.133	7.66667	100.6	10.3133	838.667	76.34	4.79733
2019-01-01 09:15:00	392.2	0	157.6	10.8667	838.6	73.2733	7.21467
2019-01-01 09:30:00	476.333	239.733	133.133	10.8	838.687	72.8733	9.60733
2019-01-01 09:45:00	542.333	283.2	162.867	10.88	838.753	73.2067	11.8493
2019-01-01 10:00:00	598	423.2	143.467	11.4667	838.84	70.8067	13.9487
2019-01-01 10:15:00	651.467	750.333	55.2667	11.4333	838.947	71.3267	15.996
2019-01-01 10:30:00	701.6	801.733	64.8667	11.6467	839.007	69.92	17.812
2019-01-01 10:45:00	755.6	843.267	73.7333	12.2467	839.1	67.02	19.5233
2019-01-01 11:00:00	821.267	875.933	82.1333	12.3933	838.907	66.18	21.0627
2019-01-01 11:15:00	878.6	891.733	88.5333	12.56	838.747	65.04	22.292
2019-01-01 11:30:00	922.867	902.2	94.2667	12.7933	838.593	64.2467	23.3613
2019-01-01 11:45:00	955.867	905.2	98.6	12.9733	838.5	63.92	24.3547
2019-01-01 12:00:00	985.4	908.2	102.467	13.3333	838.113	62.3533	25.2047
2019-01-01 12:15:00	1012.47	908	105.533	13.6067	837.74	61.16	25.9347
2019-01-01 12:30:00	1038.73	910.467	108.2	14.0933	837.453	59.2333	26.5813
2019-01-01 12:45:00	1052.4	910.4	109.933	14.3067	837.04	57.8867	27.072
2019-01-01 13:00:00	1063.07	912.267	111.467	15.1467	836.6	54.9133	27.352
2019-01-01 13:15:00	1069.4	925.667	113.667	15.4067	836.293	52.72	27.4727
2019-01-01 13:30:00	1083.93	1017.53	124.933	15.88	835.92	49.68	27.416
2019-01-01 13:45:00	1096.07	934.333	114	16.0733	835.64	48.3067	27.2493
2019-01-01 14:00:00	1108	926	111.8	16.7067	835.267	44.5533	27.2393
2019-01-01 14:15:00	1088.6	919.067	109	16.76	834.893	42.44	26.754
2019-01-01 14:30:00	1066.13	924.867	107.2	17.04	834.653	39.8533	26.2287
2019-01-01 14:45:00	1033.53	931	104.933	17.5267	834.293	39.7133	25.6453
2019-01-01 15:00:00	994.4	931.8	101.333	18.0667	834.007	37.7733	24.7647
2019-01-01 15:15:00	944.933	922.933	96.2	18.2467	833.793	38.3933	23.7753
2019-01-01 15:30:00	901.133	920.533	91.2	18.3733	833.593	38.5467	22.7993
2019-01-01 15:45:00	848.6	902.733	84.3333	18.3733	833.447	38.6333	21.458
2019-01-01 16:00:00	795.533	876.267	76.4667	18.0867	833.187	39.36	20.086
2019-01-01 16:15:00	743	837.133	67.3333	18.5867	833	38.4867	18.4893
2019-01-01 16:30:00	683.6	778.8	57.2	18.9133	833.02	37.86	16.6493
2019-01-01 16:45:00	630.933	542.733	114.067	18.64	833.047	38.5733	14.8473
2019-01-01 17:00:00	571.933	17.1333	256	18.4133	833.02	39.2133	12.8273
2019-01-01 17:15:00	511.8	25.7333	205.8	18.3733	833.1	39.32	10.846
2019-01-01 17:30:00	425	3.86667	155.733	18.1067	833.073	39.2	8.46467
2019-01-01 17:45:00	267.067	0.133333	93.9333	18.1733	833.3	38.8867	4.3
2019-01-01 18:00:00	124	1.66667	42.8667	17.6333	833.367	40.22	1.896
2019-01-01 18:15:00	44.0667	1.13333	11.4	16.6867	833.3	43.2267	0.922667
2019-01-01 18:30:00	19.6	0	3.4	16.4333	833.473	43.44	0.250667
2019-01-01 18:45:00	0	0	0	15.76	833.5	44.98	0
2019-01-01 19:00:00	0	0	0	15.64	833.673	45.56	0
2019-01-01 19:15:00	0	0	0	15.7067	833.753	42.4	0
2019-01-01 19:30:00	0	0	0	15.5533	833.887	40.7067	0
2019-01-01 19:45:00	0	0	0	15.36	834.007	39.2867	0
2019-01-01 20:00:00	0	0	0	15.1533	834.14	38.8667	0
2019-01-01 20:15:00	0	0	0	15.2533	834.3	38.4133	0
2019-01-01 20:30:00	0	0	0	15.4533	834.387	38.5533	0
2019-01-01 20:45:00	0	0	0	15.3733	834.507	38.4133	0
2019-01-01 21:00:00	0	0	0	15.04	834.64	38.8	0
2019-01-01 21:15:00	0	0	0	14.7533	834.8	38.4	0
2019-01-01 21:30:00	0	0	0	14.7467	834.927	37.0333	0
2019-01-01 21:45:00	0	0	0	14.6333	835.153	37.1133	0
2019-01-01 22:00:00	0	0	0	14.4933	835.327	36.7067	0
2019-01-01 22:15:00	0	0	0	14.7867	835.5	35.1333	0
2019-01-01 22:30:00	0	0	0	14.2	835.567	36.7333	0
2019-01-01 22:45:00	0	0	0	14.3067	835.607	36.5733	0
2019-01-01 23:00:00	0	0	0	13.9067	835.72	38.02	0
2019-01-01 23:15:00	0	0	0	13.7267	835.853	38.94	0
2019-01-01 23:30:00	0	0	0	14.4133	835.967	37.7333	0
2019-01-01 23:45:00	0	0	0	14.4067	835.953	38.68	0
2019-01-02	0	0	0	14.2267	836	40.6067	0
2019-01-02 00:15:00	0	0	0	14.14	836.053	42.4267	0
2019-01-02 00:30:00	0	0	0	13.96	836.207	43.92	0
2019-01-02 00:45:00	0	0	0	13.6333	836.3	44.9867	0
2019-01-02 01:00:00	0	0	0	13.1	836.407	47.1533	0
2019-01-02 01:15:00	0	0	0	12.8733	836.5	48.2	0
2019-01-02 01:30:00	0	0	0	12.6867	836.5	49.2	0
2019-01-02 01:45:00	0	0	0	12.6733	836.5	50.1667	0
2019-01-02 02:00:00	0	0	0	12.74	836.607	50.7333	0
2019-01-02 02:15:00	0	0	0	12.3867	836.593	52.5933	0
2019-01-02 02:30:00	0	0	0	12.3067	836.52	53.3867	0
2019-01-02 02:45:00	0	0	0	12.1733	836.547	54.0933	0
2019-01-02 03:00:00	0	0	0	11.9867	836.607	54.8333	0
2019-01-02 03:15:00	0	0	0	11.74	836.7	56.3533	0
2019-01-02 03:30:00	0	0	0	11.54	836.72	56.9067	0
2019-01-02 03:45:00	0	0	0	11.2933	836.853	57.84	0
2019-01-02 04:00:00	0	0	0	10.7733	836.793	60.06	0
2019-01-02 04:15:00	0	0	0	10.5933	836.753	61.2933	0
2019-01-02 04:30:00	0	0	0	10.7933	836.907	60.9667	0
2019-01-02 04:45:00	0	0	0	11.0667	836.947	60.6467	0
2019-01-02 05:00:00	0	0	0	10.7467	836.967	61.6867	0
2019-01-02 05:15:00	0	0	0	10.6133	836.953	61.0867	0
2019-01-02 05:30:00	0	0	0	10.02	836.933	62.8533	0
2019-01-02 05:45:00	0	0	0	10.1133	836.947	63.98	0
2019-01-02 06:00:00	0	0	0	10.1267	837.053	64.94	0
2019-01-02 06:15:00	0	0	0	10.0867	837.053	65.7267	0
2019-01-02 06:30:00	0	0	0	9.98667	837.253	66.28	0
2019-01-02 06:45:00	0	0	0	9.86667	837.307	67.08	0
2019-01-02 07:00:00	0	0	0	9.73333	837.527	67.4867	0
2019-01-02 07:15:00	0	0	0	9.47333	837.647	68.2733	0
2019-01-02 07:30:00	0	0	0	9.28667	837.773	69.3267	0
2019-01-02 07:45:00	0	0	0	9.27333	837.907	70.3	0
2019-01-02 08:00:00	0	0	0	9.32	838.193	70.8533	0
2019-01-02 08:15:00	3.66667	0.533333	0.933333	9.29333	838.407	71.1733	0.0593333
2019-01-02 08:30:00	48.9333	13.2667	16.1333	9.18	838.58	72.4733	0.705333
2019-01-02 08:45:00	189.533	110.467	54.6	9.86667	839.007	70.86	2.64
2019-01-02 09:00:00	286.933	6.8	99.7333	10.4133	839.267	68.92	4.69933
2019-01-02 09:15:00	390.933	0	156.733	11.8667	839.3	64.4533	7.13867
2019-01-02 09:30:00	478.467	232.467	134.733	12.26	839.367	62.8067	9.622
2019-01-02 09:45:00	546.867	298.6	157.733	12.54	839.36	61.62	11.9093
2019-01-02 10:00:00	604.2	425.2	144.533	11.7	839.493	64.8533	13.9993
2019-01-02 10:15:00	656.467	756.067	55.6	11.5	839.56	66.52	16.0027
2019-01-02 10:30:00	705.533	807.667	65.2	11.5467	839.733	66.8533	17.7893
2019-01-02 10:45:00	756.467	845.467	73.9333	11.9333	839.66	66.2667	19.4107
2019-01-02 11:00:00	820.067	875.267	81.9333	12.12	839.58	65.84	20.8767
2019-01-02 11:15:00	880.4	892.867	88.8	12.68	839.38	63.7067	22.2067
2019-01-02 11:30:00	926.133	905.467	94.6	13.26	839.247	61.1467	23.322
2019-01-02 11:45:00	960.333	909.933	99.1333	13.5733	839.1	60	24.356
2019-01-02 12:00:00	983.733	906.6	102.333	13.7333	838.927	59.6667	25.1947
2019-01-02 12:15:00	1009.4	906.933	105.333	14.3133	838.58	58.08	25.8173
2019-01-02 12:30:00	1029.73	903.133	107.333	14.5133	838.353	57.2867	26.386
2019-01-02 12:45:00	1049.6	907.267	109.8	14.8	838.14	55.2267	26.8533
2019-01-02 13:00:00	1063.2	912.8	111.733	15.5333	837.673	50.5467	27.2127
2019-01-02 13:15:00	1070.2	926.133	113.8	15.7933	837.26	47.48	27.402
2019-01-02 13:30:00	1090	1022.13	125.733	15.94	836.953	47.5267	27.4987
2019-01-02 13:45:00	1100.8	940.467	114.867	16.2533	836.56	42.7533	27.4267
2019-01-02 14:00:00	1113.4	930.4	112.4	16.8933	836.16	40.6267	27.28
2019-01-02 14:15:00	1106.8	934.733	111	16.78	835.94	38.9733	26.9673
2019-01-02 14:30:00	1072.47	931.4	108.267	17.06	835.66	35.6467	26.39
2019-01-02 14:45:00	1032.8	931	105.2	17.5867	835.38	35.82	25.7693
2019-01-02 15:00:00	994.067	932.267	101.667	17.6533	835.087	34.58	24.9013
2019-01-02 15:15:00	954.4	932.867	97.5333	17.8467	835	33.9867	23.992
2019-01-02 15:30:00	909.6	933.2	92.6667	18.2467	834.813	33.2267	23.0747
2019-01-02 15:45:00	861	918.4	86.2	18.1533	834.68	34.1	21.9
2019-01-02 16:00:00	812.2	895.733	78.5333	18.3067	834.533	34.02	20.4933
2019-01-02 16:15:00	760.6	858.933	69.4	18.28	834.54	33.8333	18.98
2019-01-02 16:30:00	706.733	808.733	59.6667	18.44	834.407	34.2933	17.1747
2019-01-02 16:45:00	654.133	756.533	49.9333	18.4333	834.4	34.54	15.448
2019-01-02 17:00:00	603.733	12.8667	271.4	18.6533	834.333	33.0733	13.6107
2019-01-02 17:15:00	541.267	17.2	214.867	18.6733	834.46	31.5933	11.506
2019-01-02 17:30:00	454.467	1.6	163.067	18.7067	834.38	31.4	9.13533
2019-01-02 17:45:00	351.133	0	117.667	18.86	834.36	30.48	6.81
2019-01-02 18:00:00	244.733	0	74.2	18.9533	834.4	30.24	4.50267
2019-01-02 18:15:00	130.867	1	32.3333	18.2667	834.46	31.5267	2.21867
2019-01-02 18:30:00	22	0	3.13333	17.68	834.527	32.4533	0.344667
2019-01-02 18:45:00	0	0	0	16.0133	834.66	37.1333	0
2019-01-02 19:00:00	0	0	0	15.06	834.793	40.4067	0
2019-01-02 19:15:00	0	0	0	14.5333	834.92	41.5533	0
2019-01-02 19:30:00	0	0	0	14.1733	834.933	42.1933	0
2019-01-02 19:45:00	0	0	0	14.2733	835.12	41.4867	0
2019-01-02 20:00:00	0	0	0	14.3	835.36	41.2733	0
2019-01-02 20:15:00	0	0	0	14.6	835.42	41.0333	0
2019-01-02 20:30:00	0	0	0	14.5733	835.553	41.82	0
2019-01-02 20:45:00	0	0	0	14.58	835.76	42.2867	0
2019-01-02 21:00:00	0	0	0	14.5133	835.893	42.7533	0
2019-01-02 21:15:00	0	0	0	14.5133	835.96	42.9	0
2019-01-02 21:30:00	0	0	0	14.6267	835.88	43.1533	0
2019-01-02 21:45:00	0	0	0	14.42	835.8	43.6867	0
2019-01-02 22:00:00	0	0	0	13.8933	835.747	45.8733	0
2019-01-02 22:15:00	0	0	0	13.94	835.72	47.02	0
2019-01-02 22:30:00	0	0	0	14.14	835.707	46.66	0
2019-01-02 22:45:00	0	0	0	14.12	835.7	46.6267	0
2019-01-02 23:00:00	0	0	0	13.9667	835.727	47.0933	0
2019-01-02 23:15:00	0	0	0	13.8267	835.8	47.5533	0
2019-01-02 23:30:00	0	0	0	13.7333	835.92	48.26	0
2019-01-02 23:45:00	0	0	0	13.6	835.94	49.3467	0
2019-01-03	0	0	0	13.4733	836.02	50.7267	0
2019-01-03 00:15:00	0	0	0	13.1733	836.1	52.9133	0
2019-01-03 00:30:00	0	0	0	13.0733	836.007	53.88	0
2019-01-03 00:45:00	0	0	0	13.0133	836.12	54.4	0
2019-01-03 01:00:00	0	0	0	13.2267	836.133	53.8267	0
2019-01-03 01:15:00	0	0	0	13.08	836.08	54.7267	0
2019-01-03 01:30:00	0	0	0	12.8067	836.093	56.8067	0
2019-01-03 01:45:00	0	0	0	12.62	836.1	58.1267	0
2019-01-03 02:00:00	0	0	0	12.6333	836.22	58.9133	0
2019-01-03 02:15:00	0	0	0	12.44	836.3	61.0667	0
2019-01-03 02:30:00	0	0	0	12.2267	836.367	62.9867	0
2019-01-03 02:45:00	0	0	0	12.2	836.3	63.4667	0
2019-01-03 03:00:00	0	0	0	12.1467	836.327	64.26	0
2019-01-03 03:15:00	0	0	0	11.9533	836.34	65.8467	0
2019-01-03 03:30:00	0	0	0	11.9267	836.367	66.1067	0
2019-01-03 03:45:00	0	0	0	11.78	836.18	66.46	0
2019-01-03 04:00:00	0	0	0	11.5667	835.98	66.94	0
2019-01-03 04:15:00	0	0	0	11.56	835.9	66.6133	0
2019-01-03 04:30:00	0	0	0	11.64	835.833	65.8533	0
2019-01-03 04:45:00	0	0	0	11.52	835.78	66.38	0
2019-01-03 05:00:00	0	0	0	11.5467	835.7	66.4467	0
2019-01-03 05:15:00	0	0	0	11.26	835.58	68.2533	0
2019-01-03 05:30:00	0	0	0	11.1067	835.713	69.6733	0
2019-01-03 05:45:00	0	0	0	10.95	835.76	70.72	0
2019-01-03 06:00:00	0	0	0	10.8667	835.727	71.0733	0
2019-01-03 06:15:00	0	0	0	10.7333	835.8	72.1	0
2019-01-03 06:30:00	0	0	0	10.5	835.827	73.2867	0
2019-01-03 06:45:00	0	0	0	10.5467	835.96	72.96	0
2019-01-03 07:00:00	0	0	0	10.56	835.96	73.3067	0
2019-01-03 07:15:00	0	0	0	10.46	836.16	73.3667	0
2019-01-03 07:30:00	0	0	0	10.3533	836.133	74.12	0
2019-01-03 07:45:00	0	0	0	10.1667	836.2	75.72	0
2019-01-03 08:00:00	0	0	0	9.39333	836.413	79.8667	0
2019-01-03 08:15:00	3.6	0.533333	1	9.04	836.56	81.72	0.0873333
2019-01-03 08:30:00	49.8	33	17.2	9.4	836.787	81.52	0.762
2019-01-03 08:45:00	194.533	118.133	55.2667	9.87333	836.8	80.3867	2.744
2019-01-03 09:00:00	292.867	7.73333	100.867	10.6067	836.827	77.14	4.772
2019-01-03 09:15:00	395.867	0	158.2	11.2067	836.96	74.8867	7.176
2019-01-03 09:30:00	489.2	227.333	140.2	11.62	836.907	72.38	9.76333
2019-01-03 09:45:00	559.733	323	155.4	11.64	836.96	72.6067	12.07
2019-01-03 10:00:00	617.2	527.667	113.267	11.7533	837	72.4467	14.216
2019-01-03 10:15:00	665.6	763.467	56.1333	12.18	837.06	70.9533	16.238
2019-01-03 10:30:00	716.067	817.4	66	12.82	837.007	68.32	18.1073
2019-01-03 10:45:00	771.733	862.933	75.5333	12.82	837.06	67.9067	19.7127
2019-01-03 11:00:00	828.467	885.933	82.9333	12.9733	837.1	67.6133	21.1153
2019-01-03 11:15:00	889.2	904.067	89.9333	13.4133	837.04	66.0267	22.364
2019-01-03 11:30:00	939.4	920	96.2667	13.7533	836.907	64.12	23.5947
2019-01-03 11:45:00	975.667	925.533	101.067	14.42	836.66	61.34	24.626
2019-01-03 12:00:00	1003.2	924.733	104.533	15	836.353	58.8667	25.492
2019-01-03 12:15:00	1033.6	928.133	108	15.76	836.08	54.6267	26.3053
2019-01-03 12:30:00	1046.6	916.667	109.133	16.1333	835.6	49.4667	26.7367
2019-01-03 12:45:00	1070.07	926.733	112.2	16.4133	835.32	46.06	27.3727
2019-01-03 13:00:00	1083.3	941.4	115.1	16.93	835.02	40.65	27.904
2019-01-03 13:15:00	979.4	824	131.667	16.2867	834.64	41.0667	26.8107
2019-01-03 13:30:00	1097.2	1026.73	144.4	17.2467	834.36	39.9067	27.908
2019-01-03 13:45:00	1120.8	967	118.4	17.1733	834.08	38.18	27.5747
2019-01-03 14:00:00	1103.4	924.533	112	17.5533	833.76	36.6267	27.338
2019-01-03 14:15:00	1084.9	911.5	109	17.76	833.52	36.91	26.903
2019-01-03 14:30:00	1084	941.8	109.6	17.8667	833.093	37.4133	26.4593
2019-01-03 14:45:00	1032.27	927.6	105	18.3667	832.88	37.2	25.796
2019-01-03 15:00:00	891.6	808.6	107.733	18.4667	832.587	37.68	22.2627
2019-01-03 15:15:00	922.933	932	98.0667	18.2067	832.38	38.46	19.718
2019-01-03 15:30:00	297.867	140.667	132	17.5467	832.22	40.24	7.118
2019-01-03 15:45:00	253.2	96.2	170.067	17.2667	831.94	41.04	8.16133
2019-01-03 16:00:00	637.8	702.267	106.8	18.1733	831.753	38.8533	15.9027
2019-01-03 16:15:00	404.733	341.6	126.4	18.0733	831.6	38.5	11.522
2019-01-03 16:30:00	729.733	896.067	65.8	18.8267	831.413	36.7467	17.9067
2019-01-03 16:45:00	652.733	772.6	51.4667	19.5267	831.4	33.68	15.3713
2019-01-03 17:00:00	592.733	65.8	257.333	19.46	831.333	33.6133	13.368
2019-01-03 17:15:00	511.8	26.1333	212.067	19.3333	831.4	33.4267	10.9553
2019-01-03 17:30:00	428.933	7.93333	161.8	19.1667	831.493	33.2667	8.83
2019-01-03 17:45:00	346.2	0	122.733	19.1867	831.56	32.66	6.76467
2019-01-03 18:00:00	247.2	6.6	81.4	18.8067	831.667	32.4	4.63933
2019-01-03 18:15:00	144.933	21.8	43.0667	18.28	831.6	32.54	2.43067
2019-01-03 18:30:00	33.0667	0.6	9	17.6067	831.72	32.1133	0.512667
2019-01-03 18:45:00	0	0	0	17.2733	831.68	30.86	0
2019-01-03 19:00:00	0	0	0	17.1533	831.747	29.5933	0
2019-01-03 19:15:00	0	0	0	17.04	831.84	28.9667	0
2019-01-03 19:30:00	0	0	0	16.9333	831.88	28.2867	0
2019-01-03 19:45:00	0	0	0	16.76	832.16	28.5267	0
2019-01-03 20:00:00	0	0	0	16.68	832.48	28.8333	0
2019-01-03 20:15:00	0	0	0	16.5267	832.62	29.08	0
2019-01-03 20:30:00	0	0	0	16.35	832.7	29.6	0
2019-01-03 20:45:00	0	0	0	16.0733	832.82	30.0133	0
2019-01-03 21:00:00	0	0	0	15.9467	833.047	30.1867	0
2019-01-03 21:15:00	0	0	0	15.8733	833.2	30.4933	0
2019-01-03 21:30:00	0	0	0	15.72	833.12	30.84	0
2019-01-03 21:45:00	0	0	0	15.5533	833.08	31.2733	0
2019-01-03 22:00:00	0	0	0	15.3933	833.48	31.9867	0
2019-01-03 22:15:00	0	0	0	15.0933	833.44	34.2	0
2019-01-03 22:30:00	0	0	0	14.8733	833.467	36.0533	0
2019-01-03 22:45:00	0	0	0	14.7933	833.46	37.0133	0
2019-01-03 23:00:00	0	0	0	14.5267	833.593	39.9867	0
2019-01-03 23:15:00	0	0	0	14.2667	833.72	42.3733	0
2019-01-03 23:30:00	0	0	0	14.2467	833.853	42.3133	0
2019-01-03 23:45:00	0	0	0	14.0667	834	43.52	0
2019-01-04	0	0	0	14.02	834.093	43.2067	0
2019-01-04 00:15:00	0	0	0	14.04	834.1	42.8067	0
2019-01-04 00:30:00	0	0	0	13.8667	834.247	43.74	0
2019-01-04 00:45:00	0	0	0	13.7533	834.4	44.5	0
2019-01-04 01:00:00	0	0	0	13.6133	834.493	45.1667	0
2019-01-04 01:15:00	0	0	0	13.4067	834.62	45.7667	0
2019-01-04 01:30:00	0	0	0	13.2867	834.793	46.4467	0
2019-01-04 01:45:00	0	0	0	13.1333	834.92	46.9267	0
2019-01-04 02:00:00	0	0	0	12.9467	835	47.8	0
2019-01-04 02:15:00	0	0	0	12.78	835.06	48.2067	0
2019-01-04 02:30:00	0	0	0	12.8067	835.127	47.6533	0
2019-01-04 02:45:00	0	0	0	12.7667	835.2	46.9	0
2019-01-04 03:00:00	0	0	0	12.64	835.253	47.3467	0
2019-01-04 03:15:00	0	0	0	12.22	835.46	49.1133	0
2019-01-04 03:30:00	0	0	0	12	835.407	50.1133	0
2019-01-04 03:45:00	0	0	0	12.0867	835.46	50.1533	0
2019-01-04 04:00:00	0	0	0	11.8467	835.433	51.5533	0
2019-01-04 04:15:00	0	0	0	11.6467	835.38	52.8467	0
2019-01-04 04:30:00	0	0	0	11.8067	835.3	52.0067	0
2019-01-04 04:45:00	0	0	0	11.6	835.3	52.5	0
2019-01-04 05:00:00	0	0	0	11.7067	835.34	51.58	0
2019-01-04 05:15:00	0	0	0	11.2533	835.14	52.62	0
2019-01-04 05:30:00	0	0	0	11.3933	835.26	51.2333	0
2019-01-04 05:45:00	0	0	0	11.28	835.2	51.1533	0
2019-01-04 06:00:00	0	0	0	11.5133	835.2	49.9933	0
2019-01-04 06:15:00	0	0	0	11.4067	835.14	50.38	0
2019-01-04 06:30:00	0	0	0	11.0467	835.193	51.8333	0
2019-01-04 06:45:00	0	0	0	11.0867	835.26	51.58	0
2019-01-04 07:00:00	0	0	0	11.12	835.367	52.1267	0
2019-01-04 07:15:00	0	0	0	11.0533	835.42	52.5933	0
2019-01-04 07:30:00	0	0	0	10.7533	835.527	54.06	0
2019-01-04 07:45:00	0	0	0	10.56	835.66	55.6133	0
2019-01-04 08:00:00	0	0	0	10.4067	835.913	57.2	0
2019-01-04 08:15:00	2.73333	0.4	0.466667	10.4333	836.12	57.0733	0.048
2019-01-04 08:30:00	47.4	24.2	13.8667	10.4733	836.48	56.9533	0.656
2019-01-04 08:45:00	104.267	24.7333	29.7333	10.84	836.56	56.4533	1.47067
2019-01-04 09:00:00	318.733	8.2	106.733	11.3	836.72	55.88	5.11667
2019-01-04 09:15:00	427.2	0	168.2	11.78	836.92	54.7067	7.68533
2019-01-04 09:30:00	510.6	226.667	147.667	12.14	837.027	53.42	10.15
2019-01-04 09:45:00	578.133	345.933	154.867	12.5	837.28	52.9733	12.4307
2019-01-04 10:00:00	636.467	639.6	81.8667	12.78	837.493	52.5333	14.6567
2019-01-04 10:15:00	682.133	785.2	57.6667	13.1	837.62	51.32	16.6347
2019-01-04 10:30:00	729.467	836.667	67.5333	13.2267	837.913	50.6467	18.49
2019-01-04 10:45:00	783.333	879.267	77	13.7133	838.12	49.2867	20.208
2019-01-04 11:00:00	844.133	905.733	84.9333	13.9867	838.013	48.1	21.7093
2019-01-04 11:15:00	904.933	922.2	91.8	14.2733	838	46.4733	23.0713
2019-01-04 11:30:00	949.667	931.667	97.4	14.3667	837.853	46.0533	24.1673
2019-01-04 11:45:00	983.733	934.733	102.2	14.7133	837.7	45.06	25.2
2019-01-04 12:00:00	1010.93	935.133	105.8	15.3	837.647	43.02	25.9953
2019-01-04 12:15:00	1039.47	934.733	108.933	15.6533	837.38	41.8267	26.748
2019-01-04 12:30:00	1066.2	934.533	111.333	15.6467	836.993	39.8933	27.36
2019-01-04 12:45:00	1073.2	927.4	112.533	15.9933	836.84	36.8333	27.7513
2019-01-04 13:00:00	1078.93	924.933	113.133	16.4533	836.533	34.8667	27.9493
2019-01-04 13:15:00	1077.8	925	114	16.96	836.18	32.8267	27.8993
2019-01-04 13:30:00	1078.73	997.8	123.067	17.02	835.887	32.9667	27.5713
2019-01-04 13:45:00	1070.47	918.933	112.933	17.2333	835.5	33.22	27.1973
2019-01-04 14:00:00	1081	903.4	109.533	17.3667	835.247	32.9067	27.1553
2019-01-04 14:15:00	1070.4	903.133	107.867	17.3133	834.98	33.08	26.7267
2019-01-04 14:30:00	1050.07	909.867	106.4	17.3667	834.66	32.5867	26.382
2019-01-04 14:45:00	1010.93	908.867	103.267	17.8267	834.26	31.36	25.6033
2019-01-04 15:00:00	971.933	909.133	99.7333	18.1133	833.98	30.3533	24.7993
2019-01-04 15:15:00	929.267	905.933	95.3333	18.1267	833.78	29.5533	23.8433
2019-01-04 15:30:00	869.2	887.867	88.9333	18.7867	833.567	28.0733	22.374
2019-01-04 15:45:00	797.267	850.6	80.4	18.8267	833.58	26.96	20.6873
2019-01-04 16:00:00	718.2	796.533	70.2	18.66	833.327	27.06	18.552
2019-01-04 16:15:00	667	766.8	62.7333	18.72	833.04	25.76	17.0313
2019-01-04 16:30:00	642.2	748.133	55.8667	18.9067	833.04	25.4333	15.8793
2019-01-04 16:45:00	589.8	430.067	144	19.0733	832.9	25.2667	14.0773
2019-01-04 17:00:00	536.2	18.8	250.067	19.1933	832.847	24.6533	12.2467
2019-01-04 17:15:00	466.667	25.8	194.8	19.04	832.58	24.1667	10.0667
2019-01-04 17:30:00	388.067	9	148.2	18.96	832.527	23.6467	7.958
2019-01-04 17:45:00	325.133	0	116.733	18.7667	832.48	23.44	6.388
2019-01-04 18:00:00	231.333	5.26667	76.8	18.4133	832.467	23.1067	4.25933
2019-01-04 18:15:00	133.933	17.8667	40.0667	18.14	832.34	21.68	2.26133
2019-01-04 18:30:00	32.2667	0.0666667	7.2	17.7133	832.327	21.0933	0.47
2019-01-04 18:45:00	0	0	0	17.3467	832.46	20.82	0
2019-01-04 19:00:00	0	0	0	17.18	832.567	21.4333	0
2019-01-04 19:15:00	0	0	0	17.0467	832.62	20.92	0
2019-01-04 19:30:00	0	0	0	16.8933	832.807	20.76	0
2019-01-04 19:45:00	0	0	0	16.8467	833.04	20.7933	0
2019-01-04 20:00:00	0	0	0	16.6	833.187	21.3867	0
2019-01-04 20:15:00	0	0	0	16.46	833.38	21.7533	0
2019-01-04 20:30:00	0	0	0	16.3533	833.553	22.1933	0
2019-01-04 20:45:00	0	0	0	16.1333	833.76	23.48	0
2019-01-04 21:00:00	0	0	0	16.0733	833.88	24.8067	0
2019-01-04 21:15:00	0	0	0	15.9733	834.22	26.5267	0
2019-01-04 21:30:00	0	0	0	15.9133	834.487	28.3067	0
2019-01-04 21:45:00	0	0	0	15.6867	834.5	29.68	0
2019-01-04 22:00:00	0	0	0	15.5533	834.593	30.4	0
2019-01-04 22:15:00	0	0	0	15.2733	834.78	32.3333	0
2019-01-04 22:30:00	0	0	0	15.08	835.14	33.6533	0
2019-01-04 22:45:00	0	0	0	14.9667	835.42	34.8067	0
2019-01-04 23:00:00	0	0	0	14.78	835.593	35.5067	0
2019-01-04 23:15:00	0	0	0	14.72	835.72	35.4667	0
2019-01-04 23:30:00	0	0	0	14.58	835.813	35.6933	0
2019-01-04 23:45:00	0	0	0	14.5133	835.72	35.7733	0
2019-01-05	0	0	0	14.3933	835.987	36.44	0
2019-01-05 00:15:00	0	0	0	14.28	836	37.0133	0
2019-01-05 00:30:00	0	0	0	14.22	836.027	37.2867	0
2019-01-05 00:45:00	0	0	0	14.1	836.16	37.5667	0
2019-01-05 01:00:00	0	0	0	13.9533	836.173	37.8733	0
2019-01-05 01:15:00	0	0	0	13.84	836.28	38.3133	0
2019-01-05 01:30:00	0	0	0	13.8	836.333	37.7533	0
2019-01-05 01:45:00	0	0	0	13.7867	836.4	37.6867	0
2019-01-05 02:00:00	0	0	0	13.54	836.493	38.5533	0
2019-01-05 02:15:00	0	0	0	13.3	836.62	39.2467	0
2019-01-05 02:30:00	0	0	0	13	836.727	39.92	0
2019-01-05 02:45:00	0	0	0	12.74	836.8	40.7667	0
2019-01-05 03:00:00	0	0	0	12.5867	836.78	41.2	0
2019-01-05 03:15:00	0	0	0	12.2533	836.753	42.24	0
2019-01-05 03:30:00	0	0	0	12.22	836.847	42	0
2019-01-05 03:45:00	0	0	0	12.2933	836.593	40.8733	0
2019-01-05 04:00:00	0	0	0	12.04	836.653	40.3	0
2019-01-05 04:15:00	0	0	0	12.3	836.707	39.0267	0
2019-01-05 04:30:00	0	0	0	12.5267	836.56	38.6	0
2019-01-05 04:45:00	0	0	0	12.2467	836.653	39.08	0
2019-01-05 05:00:00	0	0	0	12.3467	836.38	39.5533	0
2019-01-05 05:15:00	0	0	0	12.1	836.153	40.3333	0
2019-01-05 05:30:00	0	0	0	11.6867	836.173	41.8333	0
2019-01-05 05:45:00	0	0	0	10.6933	836.453	45.2133	0
2019-01-05 06:00:00	0	0	0	9.88	836.54	49.4067	0
2019-01-05 06:15:00	0	0	0	10.3133	836.753	49.36	0
2019-01-05 06:30:00	0	0	0	10.5867	836.927	46.4667	0
2019-01-05 06:45:00	0	0	0	10.8533	837.207	43.1667	0
2019-01-05 07:00:00	0	0	0	11.1333	837.407	41.26	0
2019-01-05 07:15:00	0	0	0	11.0067	837.5	40.4667	0
2019-01-05 07:30:00	0	0	0	10.7667	837.5	41.5133	0
2019-01-05 07:45:00	0	0	0	10.14	837.553	42.64	0
2019-01-05 08:00:00	0	0	0	10.0267	837.987	43.5733	0
2019-01-05 08:15:00	1.46667	0.2	0.0666667	10.1333	838.2	42.7467	0.0113333
2019-01-05 08:30:00	11.9	1.6	4.8	9.98	838.28	42.86	0.359
2019-01-05 08:45:00	235.467	132.467	62.6	11.6067	838.5	38.42	3.12333
2019-01-05 09:00:00	342.2	5.46667	111.8	13.16	838.5	34.86	5.40533
2019-01-05 09:15:00	457.267	0	177.8	13.3467	838.607	35.14	8.05533
2019-01-05 09:30:00	546.733	230.733	157.133	13.0467	838.873	35.9867	10.6367
2019-01-05 09:45:00	615.933	488.733	117.8	13.1267	838.953	36.2	12.9307
2019-01-05 10:00:00	670.4	758.8	49.9333	14.56	839.06	32.6	15.1347
2019-01-05 10:15:00	718.533	816.867	60.1333	14.9733	839.247	33.5733	17.1133
2019-01-05 10:30:00	765.8	873	70.5333	13.9	839.307	36.1067	18.8973
2019-01-05 10:45:00	819.2	916.667	80.2667	15.4867	839.347	28.3	20.528
2019-01-05 11:00:00	885.133	947.667	89	16.28	839.32	23.62	21.9833
2019-01-05 11:15:00	944	961.467	95.7333	14.68	839.347	36.1867	23.1647
2019-01-05 11:30:00	985.267	965	101	13.5667	839.367	39.3933	24.2413
2019-01-05 11:45:00	1017.67	966	105.467	14.16	839.3	38.0533	25.1667
2019-01-05 12:00:00	1053.87	972.867	110.267	14.3267	839.24	32.1467	26.0787
2019-01-05 12:15:00	1079.6	970.067	113.333	15.0333	839	24.6067	26.5947
2019-01-05 12:30:00	1094.2	957.867	114.267	15.34	838.94	22.8133	27.1967
2019-01-05 12:45:00	1096.6	949.267	115.133	15.7933	838.593	27.54	27.598
2019-01-05 13:00:00	1106.33	948.6	116.467	16.1333	838.46	24.18	27.928
2019-01-05 13:15:00	1111.8	955.067	118.133	16.58	838.14	20.5267	27.9613
2019-01-05 13:30:00	1125.6	1040.93	128.733	17.1467	837.593	18.4	27.8767
2019-01-05 13:45:00	1131.33	977.133	120.133	17.46	837.247	19.5867	27.7833
2019-01-05 14:00:00	1139.6	950.4	115.733	17.8933	837.007	18.7867	27.636
2019-01-05 14:15:00	1130.93	951.533	113.933	18.1867	836.793	18.0867	27.3933
2019-01-05 14:30:00	1116	965	113	18.2467	836.573	16.8067	27.0313
2019-01-05 14:45:00	1090.13	977.133	111.267	18.6067	836.293	14.32	26.5387
2019-01-05 15:00:00	1050.2	981.6	108.067	19.4733	836.073	11.9	25.7053
2019-01-05 15:15:00	1000.87	971.267	102.533	19.8867	835.793	9.8	24.5127
2019-01-05 15:30:00	936.4	952.667	95.8667	20.3867	835.64	8.70667	23.1973
2019-01-05 15:45:00	893.733	950.133	89.9333	20.1133	835.347	8.2	21.862
2019-01-05 16:00:00	831.067	917.2	81.4	21.32	835.107	8.95333	20.4033
2019-01-05 16:15:00	776	874.2	71.9333	20.78	834.947	9.42667	19.014
2019-01-05 16:30:00	719.533	819.333	61.3333	20.84	834.707	9.7	17.268
2019-01-05 16:45:00	648.133	748	50.4	20.1333	834.547	11.04	15.2407
2019-01-05 17:00:00	598.267	151.933	224.533	20.2533	834.413	11.1133	13.1387
2019-01-05 17:15:00	517.133	15.4667	211.8	20.0667	834.347	11.3	10.6393
2019-01-05 17:30:00	427	6.2	159	19.62	834.087	12.5867	8.208
2019-01-05 17:45:00	292.667	0	103.733	19.3667	833.953	13.4867	5.15933
2019-01-05 18:00:00	157.533	2.53333	52.8	18.2067	834.107	15.4867	2.62867
2019-01-05 18:15:00	81.8667	2.4	24.5333	17.6067	834.307	16.7467	1.206
2019-01-05 18:30:00	16	0	3	16.98	834.573	17.9467	0.233333
2019-01-05 18:45:00	0	0	0	16.2	834.6	19.4933	0
2019-01-05 19:00:00	0	0	0	16.0067	834.6	20	0
2019-01-05 19:15:00	0	0	0	15.7333	834.653	20.3267	0
2019-01-05 19:30:00	0	0	0	15.8733	834.787	20.3333	0
2019-01-05 19:45:00	0	0	0	16.1133	834.853	19.9933	0
2019-01-05 20:00:00	0	0	0	15.9667	834.987	21.9733	0
2019-01-05 20:15:00	0	0	0	15.6533	835.053	22.9	0
2019-01-05 20:30:00	0	0	0	15.1667	835.38	24.7067	0
2019-01-05 20:45:00	0	0	0	15.1733	835.553	26.62	0
2019-01-05 21:00:00	0	0	0	15.1667	835.88	26.9667	0
2019-01-05 21:15:00	0	0	0	14.8867	836.053	29.14	0
2019-01-05 21:30:00	0	0	0	15.0933	836.16	28.3333	0
2019-01-05 21:45:00	0	0	0	15.7933	836.4	26.5067	0
2019-01-05 22:00:00	0	0	0	15.5733	836.533	30.1267	0
2019-01-05 22:15:00	0	0	0	15.38	836.507	33.2533	0
2019-01-05 22:30:00	0	0	0	15.4667	836.86	35.8067	0
2019-01-05 22:45:00	0	0	0	15.46	837.007	36.4667	0
2019-01-05 23:00:00	0	0	0	15.2267	837.08	39.48	0
2019-01-05 23:15:00	0	0	0	15.1	836.91	42.36	0
2019-01-05 23:30:00	0	0	0	14.9933	836.787	44.5667	0
2019-01-05 23:45:00	0	0	0	14.64	836.853	45.9133	0
2019-01-06	0	0	0	14.6067	836.813	45.8933	0
2019-01-06 00:15:00	0	0	0	14.5533	836.693	45.7333	0
2019-01-06 00:30:00	0	0	0	14.4733	836.647	45.4133	0
2019-01-06 00:45:00	0	0	0	14.3333	836.553	45.22	0
2019-01-06 01:00:00	0	0	0	14.2133	836.6	45.1867	0
2019-01-06 01:15:00	0	0	0	13.7533	836.6	46.5067	0
2019-01-06 01:30:00	0	0	0	13.1133	836.687	48.42	0
2019-01-06 01:45:00	0	0	0	13.34	836.647	48.1067	0
2019-01-06 02:00:00	0	0	0	13.4867	836.513	47.8333	0
2019-01-06 02:15:00	0	0	0	13.66	836.447	48.4	0
2019-01-06 02:30:00	0	0	0	13.5467	836.42	48.8	0
2019-01-06 02:45:00	0	0	0	13.3	836.393	49.3933	0
2019-01-06 03:00:00	0	0	0	12.9133	836.32	50.5533	0
2019-01-06 03:15:00	0	0	0	12.8067	836.293	50.8733	0
2019-01-06 03:30:00	0	0	0	12.7067	836.353	50.9467	0
2019-01-06 03:45:00	0	0	0	12.6667	836.247	50.8067	0
2019-01-06 04:00:00	0	0	0	12.84	836.007	49.8933	0
2019-01-06 04:15:00	0	0	0	12.54	835.953	50.4133	0
2019-01-06 04:30:00	0	0	0	12.2133	835.913	51.6333	0
2019-01-06 04:45:00	0	0	0	11.66	835.793	53.5333	0
2019-01-06 05:00:00	0	0	0	11.4733	835.7	54.2533	0
2019-01-06 05:15:00	0	0	0	10.9	835.647	55.6933	0
2019-01-06 05:30:00	0	0	0	10.9133	835.64	55.4667	0
2019-01-06 05:45:00	0	0	0	10.8133	835.747	55.5867	0
2019-01-06 06:00:00	0	0	0	11.0067	835.7	54.82	0
2019-01-06 06:15:00	0	0	0	10.78	835.807	55.6867	0
2019-01-06 06:30:00	0	0	0	10.3067	835.88	57.16	0
2019-01-06 06:45:00	0	0	0	10.62	835.853	56.08	0
2019-01-06 07:00:00	0	0	0	10.2333	836.007	57.4867	0
2019-01-06 07:15:00	0	0	0	10.3333	836.1	57.1933	0
2019-01-06 07:30:00	0	0	0	10.02	836.207	58.2333	0
2019-01-06 07:45:00	0	0	0	10.9133	836.3	54.9533	0
2019-01-06 08:00:00	0	0	0	10.6867	836.54	55.7133	0
2019-01-06 08:15:00	2.4	0.4	0.4	10.4467	836.607	56.6867	0.0166667
2019-01-06 08:30:00	46.5333	37.5333	14.0667	10.18	836.74	57.9333	0.661333
2019-01-06 08:45:00	229.933	139.2	61.2667	10.5467	836.953	57.28	3.084
2019-01-06 09:00:00	333.467	7.33333	110.4	11.32	837.067	54.8867	5.352
2019-01-06 09:15:00	435.533	0	172	12.7867	837.053	50.7467	7.81333
2019-01-06 09:30:00	517	206.667	155.067	13.4933	837.187	48.16	10.2187
2019-01-06 09:45:00	579.2	377.2	142	12.6867	837.307	50.2333	12.3647
2019-01-06 10:00:00	634.133	632.733	81.1333	12.6267	837.42	49.8533	14.4
2019-01-06 10:15:00	676.467	775.867	57.0667	12.2333	837.607	51.1267	16.2887
2019-01-06 10:30:00	721.133	827.467	66.8	12.7867	837.72	50.2867	18.0167
2019-01-06 10:45:00	774.133	869.267	76.1333	12.8067	837.853	51.0133	19.706
2019-01-06 11:00:00	837.533	900.667	84.5333	13.6467	837.987	48.4533	21.1687
2019-01-06 11:15:00	901.067	919.333	91.6667	14.1	837.893	46.6533	22.4873
2019-01-06 11:30:00	945.333	926.8	97.2	14.66	837.78	45.2133	23.58
2019-01-06 11:45:00	979.2	930.733	101.8	14.6533	837.54	45.5067	24.518
2019-01-06 12:00:00	1002.73	928.533	105.267	15.14	837.207	44.5	25.27
2019-01-06 12:15:00	1026.6	924.533	108	15.7333	836.993	42.4067	26.1027
2019-01-06 12:30:00	1048	919.733	110	15.74	836.553	42.1733	26.542
2019-01-06 12:45:00	1052.8	909.933	110.667	16.1533	836.34	40.36	26.858
2019-01-06 13:00:00	1063.53	912.067	112.333	16.3	835.967	40.3733	27.0853
2019-01-06 13:15:00	1070.6	918.933	113.6	17.0333	835.593	37.08	27.2213
2019-01-06 13:30:00	1080.2	993.467	123	17.1533	835.353	36.86	27.1047
2019-01-06 13:45:00	1090.27	944.333	116.467	17.7	834.993	35.1533	27.058
2019-01-06 14:00:00	1090.27	910.467	111.133	18.1333	834.667	33.86	26.758
2019-01-06 14:15:00	1080.73	910.8	109.4	18.46	834.293	33.34	26.3693
2019-01-06 14:30:00	1061.13	918.067	107.867	19.02	833.987	31.8933	25.8427
2019-01-06 14:45:00	1022.4	916.6	104.8	19.2133	833.693	31.24	25.2333
2019-01-06 15:00:00	982.067	917.533	101.267	19.78	833.493	30.1	24.4007
2019-01-06 15:15:00	936.667	911.267	96.4667	19.8867	833.24	28.64	23.244
2019-01-06 15:30:00	883	900.2	90.9333	20.4933	833.08	26.9067	22.1547
2019-01-06 15:45:00	821.933	874.4	83.4	20.38	832.947	26.3267	20.4973
2019-01-06 16:00:00	749.733	833.2	74.3333	20.7533	832.88	26.0133	18.7833
2019-01-06 16:15:00	721.067	825.533	68.1333	21.0067	832.64	24.6067	17.784
2019-01-06 16:30:00	664.933	776.667	58.5333	21.3733	832.48	23.2133	16.0127
2019-01-06 16:45:00	579.133	394.267	158.267	21.52	832.4	22.5733	13.4753
2019-01-06 17:00:00	493.067	26.6667	238.333	21.4267	832.447	22.92	10.9753
2019-01-06 17:15:00	405.333	35.9333	180.333	21.3933	832.353	22.5067	8.532
2019-01-06 17:30:00	304.533	26	126.533	21.2133	832.313	22.6467	6.09933
2019-01-06 17:45:00	228.333	1	91.8	20.88	832.247	22.3667	4.298
2019-01-06 18:00:00	151.6	9.86667	57.1333	20.8467	832.093	22.5333	2.82867
2019-01-06 18:15:00	94.5333	2.6	30.6667	20.66	832.053	22.2733	1.59467
2019-01-06 18:30:00	17.5333	0	3.53333	19.96	832.147	23.28	0.276
2019-01-06 18:45:00	0	0	0	19.3067	832	24.2867	0
2019-01-06 19:00:00	0	0	0	19.0333	832.087	24.8533	0
2019-01-06 19:15:00	0	0	0	18.64	832.207	26.1867	0
2019-01-06 19:30:00	0	0	0	17.38	832.32	30.0467	0
2019-01-06 19:45:00	0	0	0	17.62	832.56	29.8467	0
2019-01-06 20:00:00	0	0	0	17.3133	832.74	31.7667	0
2019-01-06 20:15:00	0	0	0	16.26	833.007	34.48	0
2019-01-06 20:30:00	0	0	0	16.2133	833.12	34.0867	0
2019-01-06 20:45:00	0	0	0	17.2867	833.307	29.72	0
2019-01-06 21:00:00	0	0	0	17.6333	833.507	27.74	0
2019-01-06 21:15:00	0	0	0	17.5667	833.6	27.0667	0
2019-01-06 21:30:00	0	0	0	17.5467	833.62	26.8133	0
2019-01-06 21:45:00	0	0	0	17.34	833.807	28.1733	0
2019-01-06 22:00:00	0	0	0	17.0667	833.92	27.4533	0
2019-01-06 22:15:00	0	0	0	17.0133	834.053	26.2133	0
2019-01-06 22:30:00	0	0	0	17.1933	834.1	25.0533	0
2019-01-06 22:45:00	0	0	0	17.1333	834.153	24.3733	0
2019-01-06 23:00:00	0	0	0	17.3	834.373	23.3933	0
2019-01-06 23:15:00	0	0	0	17.2333	834.4	23.54	0
2019-01-06 23:30:00	0	0	0	16.9667	834.42	24.1667	0
2019-01-06 23:45:00	0	0	0	16.92	834.5	24.1867	0
2019-01-07	0	0	0	16.7733	834.587	24.42	0
2019-01-07 00:15:00	0	0	0	16.6667	834.547	24.8133	0
2019-01-07 00:30:00	0	0	0	16.06	834.54	26.2467	0
2019-01-07 00:45:00	0	0	0	15.9267	834.647	27.5467	0
2019-01-07 01:00:00	0	0	0	15.74	834.707	28.84	0
2019-01-07 01:15:00	0	0	0	15.4867	834.8	30.2733	0
2019-01-07 01:30:00	0	0	0	15.6267	834.82	31.2067	0
2019-01-07 01:45:00	0	0	0	15.6933	834.953	31.3733	0
2019-01-07 02:00:00	0	0	0	15.68	835.02	31.2533	0
2019-01-07 02:15:00	0	0	0	15.6	835.1	31.8533	0
2019-01-07 02:30:00	0	0	0	15.3867	835.1	33.2267	0
2019-01-07 02:45:00	0	0	0	15.26	835.1	34.52	0
2019-01-07 03:00:00	0	0	0	15.1067	835.1	35.3667	0
2019-01-07 03:15:00	0	0	0	14.82	835.1	36.6867	0
2019-01-07 03:30:00	0	0	0	14.4667	835.187	38.1067	0
2019-01-07 03:45:00	0	0	0	14.1667	835.147	39.4267	0
2019-01-07 04:00:00	0	0	0	14.0867	835.233	40.1333	0
2019-01-07 04:15:00	0	0	0	13.8067	835.047	40.9133	0
2019-01-07 04:30:00	0	0	0	13.6467	835.067	41.7333	0
2019-01-07 04:45:00	0	0	0	13.5733	834.947	42.2333	0
2019-01-07 05:00:00	0	0	0	13.2067	834.9	43.1133	0
2019-01-07 05:15:00	0	0	0	13.1	834.847	42.9067	0
2019-01-07 05:30:00	0	0	0	12.18	834.907	46.32	0
2019-01-07 05:45:00	0	0	0	12.1533	834.893	46.64	0
2019-01-07 06:00:00	0	0	0	11.8733	834.973	46.7	0
2019-01-07 06:15:00	0	0	0	11.6	835.107	48.2067	0
2019-01-07 06:30:00	0	0	0	11.5733	835.133	48.02	0
2019-01-07 06:45:00	0	0	0	11.76	835.2	46.0933	0
2019-01-07 07:00:00	0	0	0	11.8533	835.327	44.3333	0
2019-01-07 07:15:00	0	0	0	11.9467	835.5	43.24	0
2019-01-07 07:30:00	0	0	0	12.0533	835.54	42.58	0
2019-01-07 07:45:00	0	0	0	11.5467	835.753	44.2733	0
2019-01-07 08:00:00	0	0	0	11.02	835.993	45.9333	0
2019-01-07 08:15:00	2.53333	0.533333	0.466667	10.6733	836.153	47.8533	0.024
2019-01-07 08:30:00	43.6667	26.8667	13.6	10.56	836.287	49.58	0.658667
2019-01-07 08:45:00	218.8	129.4	60.3333	11.34	836.407	47.12	2.954
2019-01-07 09:00:00	325.4	5.6	109.067	13.7133	836.5	41.1467	5.168
2019-01-07 09:15:00	432.133	0	170.667	14.18	836.5	40.7333	7.66133
2019-01-07 09:30:00	520.8	204.867	157.067	14.26	836.52	42	10.1573
2019-01-07 09:45:00	585.533	393	141.6	14.28	836.6	42.98	12.366
2019-01-07 10:00:00	639.733	685.533	65.0667	14.6533	836.86	43.3333	14.4253
2019-01-07 10:15:00	684	783.867	57.6	15.46	837.007	41.72	16.338
2019-01-07 10:30:00	725.333	831.867	67.2667	15.4267	837.033	41.5733	18.0073
2019-01-07 10:45:00	773.067	870.267	76.2	16.2067	837.1	40.3333	19.5473
2019-01-07 11:00:00	835.133	899.333	84.5333	15.6133	837.08	42.4533	21.0007
2019-01-07 11:15:00	900.733	921.6	92.0667	15.8733	837	42.2	22.326
2019-01-07 11:30:00	947.2	931.8	97.8667	15.94	836.98	42.1733	23.4353
2019-01-07 11:45:00	981.733	934.867	102.333	16.2867	836.847	41.6267	24.3813
2019-01-07 12:00:00	1008.4	933	106.2	16.8333	836.587	40.6933	25.1593
2019-01-07 12:15:00	1028.8	926.733	108.467	17.2267	836.347	39.7067	25.8127
2019-01-07 12:30:00	1053.87	923.533	110.6	17.22	836.067	39.6533	26.418
2019-01-07 12:45:00	1064.8	920.6	112.2	18.14	835.747	37.7667	26.8713
2019-01-07 13:00:00	1074.47	920.733	113.6	18.66	835.467	36.06	27.18
2019-01-07 13:15:00	1077.73	923.133	114.667	19.4467	835.04	33.8	27.226
2019-01-07 13:30:00	1096.87	1005.93	124.867	19.3133	834.513	33.06	27.104
2019-01-07 13:45:00	1081.93	937.467	116	19.5067	834.193	31.6533	26.6887
2019-01-07 14:00:00	1083.53	902.333	110.333	19.8267	833.82	29.1067	26.4227
2019-01-07 14:15:00	1066.2	895.8	107.867	20.3933	833.593	28.66	25.9787
2019-01-07 14:30:00	1049.87	905.133	106.533	20.4067	833.22	27.8467	25.6
2019-01-07 14:45:00	1031.33	920.8	105.6	20.6733	832.993	25.5667	25.2793
2019-01-07 15:00:00	1008.6	932.867	103.333	21.3933	832.6	24.74	24.7507
2019-01-07 15:15:00	968.467	925	99.5333	22.5867	832.347	21.58	23.7567
2019-01-07 15:30:00	926.267	936.133	94.4	22.3933	832.033	21.62	22.82
2019-01-07 15:45:00	867.067	913	87.6	22.6133	831.82	21.0467	21.4807
2019-01-07 16:00:00	789.533	872	76.8	22.56	831.687	20.72	19.5327
2019-01-07 16:15:00	740.2	840.4	69.6667	22.7333	831.5	20.7933	18.1653
2019-01-07 16:30:00	685.933	796.6	60.4	22.68	831.5	18.9267	16.2573
2019-01-07 16:45:00	581.067	347.2	177.733	22.48	831.493	19.9	13.5727
2019-01-07 17:00:00	524.933	22.2	252.6	22.4733	831.32	20.96	11.6087
2019-01-07 17:15:00	435.867	28.0667	190.2	22.46	831.22	22.2267	9.09533
2019-01-07 17:30:00	336.8	20.2667	136	22.2067	831.153	23.8133	6.80067
2019-01-07 17:45:00	255.133	0	98.1333	21.94	831.247	23.9333	4.97867
2019-01-07 18:00:00	176.6	1.93333	62.6667	21.8867	831.293	23.9733	3.21467
2019-01-07 18:15:00	82.6667	2.13333	27	20.62	831.413	25.74	1.40933
2019-01-07 18:30:00	21.2	0	4.66667	19.7333	831.5	26.68	0.300667
2019-01-07 18:45:00	0	0	0	19.44	831.633	26.58	0
2019-01-07 19:00:00	0	0	0	19.2667	831.5	26.0267	0
2019-01-07 19:15:00	0	0	0	19.1467	831.58	25.4867	0
2019-01-07 19:30:00	0	0	0	18.8933	831.647	25.3	0
2019-01-07 19:45:00	0	0	0	18.4933	831.807	25.4067	0
2019-01-07 20:00:00	0	0	0	18.4267	832	24.0133	0
2019-01-07 20:15:00	0	0	0	18.68	832.067	22.06	0
2019-01-07 20:30:00	0	0	0	18.7267	832.047	21.4267	0
2019-01-07 20:45:00	0	0	0	18.9133	832.193	20.8267	0
2019-01-07 21:00:00	0	0	0	19.1933	832.253	20.4933	0
2019-01-07 21:15:00	0	0	0	19.0133	832.347	21.2133	0
2019-01-07 21:30:00	0	0	0	18.5733	832.393	22.5067	0
2019-01-07 21:45:00	0	0	0	18.4533	832.513	23.2933	0
2019-01-07 22:00:00	0	0	0	18.4467	832.647	23.96	0
2019-01-07 22:15:00	0	0	0	18.4133	832.633	24.7133	0
2019-01-07 22:30:00	0	0	0	18.3533	832.747	25.2	0
2019-01-07 22:45:00	0	0	0	18.5467	832.947	25.5733	0
2019-01-07 23:00:00	0	0	0	18.4467	832.853	26.0867	0
2019-01-07 23:15:00	0	0	0	18.2867	832.893	26.9333	0
2019-01-07 23:30:00	0	0	0	18.24	832.953	27.7	0
2019-01-07 23:45:00	0	0	0	17.8467	832.74	29.24	0
2019-01-08	0	0	0	18.1267	832.747	29.6267	0
2019-01-08 00:15:00	0	0	0	17.8733	832.707	30.2133	0
2019-01-08 00:30:00	0	0	0	17.6133	832.6	31.2467	0
2019-01-08 00:45:00	0	0	0	17.4067	832.76	32.5667	0
2019-01-08 01:00:00	0	0	0	17.5	832.8	33.4667	0
2019-01-08 01:15:00	0	0	0	17.1933	832.707	35.2667	0
2019-01-08 01:30:00	0	0	0	17.0333	832.693	37.2267	0
2019-01-08 01:45:00	0	0	0	17.0133	832.787	38.74	0
2019-01-08 02:00:00	0	0	0	16.7333	832.653	40.8867	0
2019-01-08 02:15:00	0	0	0	16.6533	832.52	42.1133	0
2019-01-08 02:30:00	0	0	0	16.7	832.453	42.76	0
2019-01-08 02:45:00	0	0	0	16.5	832.32	43.82	0
2019-01-08 03:00:00	0	0	0	16.54	831.94	42.88	0
2019-01-08 03:15:00	0	0	0	16.4467	832.047	42.1533	0
2019-01-08 03:30:00	0	0	0	16.6	831.373	39.9667	0
2019-01-08 03:45:00	0	0	0	17.2467	831.053	33	0
2019-01-08 04:00:00	0	0	0	16.5467	831.493	39.6733	0
2019-01-08 04:15:00	0	0	0	16.36	831.653	39.0733	0
2019-01-08 04:30:00	0	0	0	16.2	831.64	40.9467	0
2019-01-08 04:45:00	0	0	0	15.9667	831.68	42.6	0
2019-01-08 05:00:00	0	0	0	16.2467	831.993	41.5333	0
2019-01-08 05:15:00	0	0	0	16.18	832.18	41.5533	0
2019-01-08 05:30:00	0	0	0	16.0467	832.06	42.84	0
2019-01-08 05:45:00	0	0	0	16.0267	831.833	43.9133	0
2019-01-08 06:00:00	0	0	0	15.8867	832.04	45.02	0
2019-01-08 06:15:00	0	0	0	15.66	832.613	47.0067	0
2019-01-08 06:30:00	0	0	0	15.32	832.8	49.8133	0
2019-01-08 06:45:00	0	0	0	15.0333	832.96	52.0467	0
2019-01-08 07:00:00	0	0	0	14.7267	833.093	53.8533	0
2019-01-08 07:15:00	0	0	0	14.66	833.28	53.96	0
2019-01-08 07:30:00	0	0	0	14.3133	833.3	56.56	0
2019-01-08 07:45:00	0	0	0	14.12	833.407	57.9467	0
2019-01-08 08:00:00	0	0	0	13.66	833.74	62.34	0
2019-01-08 08:15:00	0	0	0	13.4667	834.1	63.0133	0
2019-01-08 08:30:00	0	0	0	12.58	834.4	69.68	0
2019-01-08 08:45:00	9.93333	3.13333	6.06667	11.62	834.44	77.9467	0.34
2019-01-08 09:00:00	23.0667	5.6	18.7333	11.2267	834.247	80.9	0.794
2019-01-08 09:15:00	29.2667	7.13333	24.2667	11.5667	834.633	77.18	1.00067
2019-01-08 09:30:00	28.7333	6.66667	23.2	11.82	834.847	74.82	0.962667
2019-01-08 09:45:00	33.6	7.93333	27.1333	12.0133	834.967	73.12	1.13733
2019-01-08 10:00:00	44.6667	14.7333	36.6667	12.7733	834.9	67.6267	1.52
2019-01-08 10:15:00	74.4667	39.4667	63.0667	12.6867	834.98	68.8667	2.51
2019-01-08 10:30:00	94.2667	46.2	84.5333	12.84	835	68.4133	3.25867
2019-01-08 10:45:00	117.4	53.3333	100.533	13.34	835.053	64.6333	3.94867
2019-01-08 11:00:00	115.2	49.6	99.5333	13.6133	835.447	62.9733	3.91267
2019-01-08 11:15:00	108.467	43.8	93.6667	13.48	835.607	63.4267	3.69667
2019-01-08 11:30:00	110.467	43.4	95.6667	13.26	835.707	65.46	3.79
2019-01-08 11:45:00	120.067	45.4667	104.267	12.9	835.28	67.7467	4.088
2019-01-08 12:00:00	144.4	52.6667	122.8	13.0067	835.107	66.6667	4.94467
2019-01-08 12:15:00	160.333	55.6	136.333	13.1933	834.96	65.2733	5.45267
2019-01-08 12:30:00	152.733	52.0667	129.667	13.3267	834.607	63.6467	5.178
2019-01-08 12:45:00	134.933	45.2667	114	13.5067	834.207	61.18	4.616
2019-01-08 13:00:00	177	58.8667	152.067	13.6267	833.66	61.9267	6.07533
2019-01-08 13:15:00	204.4	67	175.867	13.5333	833.02	63.06	6.94867
2019-01-08 13:30:00	207.6	66.6667	177.933	13.7333	832.633	62.5267	7.032
2019-01-08 13:45:00	240.8	76.2	200.933	13.6133	832.607	62.9867	8.02333
2019-01-08 14:00:00	216.4	70.7333	186.6	13.3467	832.387	65.6467	7.21133
2019-01-08 14:15:00	190.133	61.5333	164.2	13.3733	832.427	67.0333	6.49933
2019-01-08 14:30:00	154.867	48	125.267	13.32	832.253	65.4	5.044
2019-01-08 14:45:00	178.2	62.8667	152.533	13.28	831.84	64.8067	5.964
2019-01-08 15:00:00	113.267	38	94.2667	13.0133	831.813	64.1333	3.99867
2019-01-08 15:15:00	113.267	38.8667	92.3333	12.9	831.24	65.8	3.78133
2019-01-08 15:30:00	97.4667	33.1333	73	12.94	831.4	65.8333	3.21733
2019-01-08 15:45:00	96.3333	40.3333	76.1333	13.1333	831.413	65.1667	3.07867
2019-01-08 16:00:00	89.9333	41.7333	71.8	13.0267	831.407	66.02	2.904
2019-01-08 16:15:00	66.8667	31.3333	50.6667	12.9667	831.527	66.1867	2.196
2019-01-08 16:30:00	81.6	40.7333	63.6	13.14	831.267	66.2067	2.828
2019-01-08 16:45:00	77.4667	44.5333	59.2667	13.16	831.12	66.82	2.59067
2019-01-08 17:00:00	50.9333	24.7333	39.2667	12.7667	831.447	71.92	1.70267
2019-01-08 17:15:00	38.2667	10.2667	28.4667	12.6267	831.287	72.2733	1.29
2019-01-08 17:30:00	30.3333	6.6	22.2	12.56	831.54	72.6933	1.032
2019-01-08 17:45:00	27.6667	6.33333	19.2667	12.4133	831.74	72.18	0.902
2019-01-08 18:00:00	17.2667	4.66667	12.1333	12.3933	831.313	71.5267	0.524
2019-01-08 18:15:00	7	2.4	3.33333	12.34	831.673	71.3267	0.138
2019-01-08 18:30:00	0.6	0.266667	0	12.48	831.9	69.2933	0
2019-01-08 18:45:00	0	0	0	12.1667	831.673	70.54	0
2019-01-08 19:00:00	0	0	0	12.2733	831.967	69.8267	0
2019-01-08 19:15:00	0	0	0	12.28	832.007	70.2133	0
2019-01-08 19:30:00	0	0	0	12.1067	832.28	70.9933	0
2019-01-08 19:45:00	0	0	0	11.9333	832.28	72.02	0
2019-01-08 20:00:00	0	0	0	11.82	832.34	72.76	0
2019-01-08 20:15:00	0	0	0	12.06	832.513	71.44	0
2019-01-08 20:30:00	0	0	0	12.1333	832.413	70.9933	0
2019-01-08 20:45:00	0	0	0	12.0933	832.28	71.0067	0
2019-01-08 21:00:00	0	0	0	12.1733	832.44	70.6467	0
2019-01-08 21:15:00	0	0	0	12.1467	832.6	70.7667	0
2019-01-08 21:30:00	0	0	0	12.28	832.6	70.0133	0
2019-01-08 21:45:00	0	0	0	12.0933	832.813	70.7867	0
2019-01-08 22:00:00	0	0	0	12.0467	832.7	70.9667	0
2019-01-08 22:15:00	0	0	0	12.1333	833.007	70.4333	0
2019-01-08 22:30:00	0	0	0	12.12	833	70.4067	0
2019-01-08 22:45:00	0	0	0	12.1333	832.88	70.0467	0
2019-01-08 23:00:00	0	0	0	12.0667	833.147	70.4133	0
2019-01-08 23:15:00	0	0	0	11.94	832.893	70.7867	0
2019-01-08 23:30:00	0	0	0	12.0267	833.54	70.44	0
2019-01-08 23:45:00	0	0	0	11.96	833.447	70.6267	0
2019-01-09	0	0	0	12.0067	833.253	69.96	0
2019-01-09 00:15:00	0	0	0	11.92	833.147	70.1333	0
2019-01-09 00:30:00	0	0	0	11.9867	832.893	69.4467	0
2019-01-09 00:45:00	0	0	0	11.9733	832.893	69.2333	0
2019-01-09 01:00:00	0	0	0	11.8267	832.887	70.0933	0
2019-01-09 01:15:00	0	0	0	11.84	833.033	69.92	0
2019-01-09 01:30:00	0	0	0	11.7	833.053	70.06	0
2019-01-09 01:45:00	0	0	0	11.52	832.987	70.82	0
2019-01-09 02:00:00	0	0	0	11.48	832.947	71.0733	0
2019-01-09 02:15:00	0	0	0	11.2467	832.947	72.1133	0
2019-01-09 02:30:00	0	0	0	11.2667	833.007	71.8067	0
2019-01-09 02:45:00	0	0	0	11	832.647	72.3267	0
2019-01-09 03:00:00	0	0	0	11.0933	832.5	71.7933	0
2019-01-09 03:15:00	0	0	0	10.9867	832.407	71.98	0
2019-01-09 03:30:00	0	0	0	11.0533	832.3	71.2267	0
2019-01-09 03:45:00	0	0	0	10.7933	832.3	72.7333	0
2019-01-09 04:00:00	0	0	0	10.8067	832.3	73.0733	0
2019-01-09 04:15:00	0	0	0	10.6	832.447	73.8867	0
2019-01-09 04:30:00	0	0	0	10.6467	832.447	73.6	0
2019-01-09 04:45:00	0	0	0	10.68	832.513	73.8	0
2019-01-09 05:00:00	0	0	0	10.8	832.553	73.4067	0
2019-01-09 05:15:00	0	0	0	10.7	832.487	73.58	0
2019-01-09 05:30:00	0	0	0	10.58	832.307	73.52	0
2019-01-09 05:45:00	0	0	0	10.68	832.307	72.6	0
2019-01-09 06:00:00	0	0	0	10.3933	832.5	73.5267	0
2019-01-09 06:15:00	0	0	0	9.90667	832.673	77.1133	0
2019-01-09 06:30:00	0	0	0	10.3467	832.847	75.5133	0
2019-01-09 06:45:00	0	0	0	10.26	832.913	75.1	0
2019-01-09 07:00:00	0	0	0	10.4667	833.093	73.3733	0
2019-01-09 07:15:00	0	0	0	10.3667	833.373	73.5333	0
2019-01-09 07:30:00	0	0	0	10.3333	833.5	73.7867	0
2019-01-09 07:45:00	0	0	0	10.3333	833.633	73.8933	0
2019-01-09 08:00:00	0	0	0	10.1533	834	74.46	0
2019-01-09 08:15:00	2.53333	0.733333	1.06667	10.1933	834.32	74.2867	0.0286667
2019-01-09 08:30:00	20.8667	2.6	10.1333	10.38	834.4	73.5467	0.438
2019-01-09 08:45:00	211.067	129.067	57.5333	10.62	834.387	72.8667	2.14867
2019-01-09 09:00:00	336.4	7.86667	112.667	11.22	834.3	70.3667	5.398
2019-01-09 09:15:00	444.6	0	174.4	11.5133	834.46	68.7267	7.74533
2019-01-09 09:30:00	481.867	190.933	144.2	11.6333	834.547	68.3933	10.0733
2019-01-09 09:45:00	588.4	421.667	131.8	11.8733	834.733	67.6467	12.7727
2019-01-09 10:00:00	645.6	643.667	81.9333	12.1667	834.947	66.6867	14.7073
2019-01-09 10:15:00	690.733	794.267	58.5333	12.7133	834.92	64.3867	16.8393
2019-01-09 10:30:00	732.467	844	68.2667	13.6133	834.947	60.82	18.69
2019-01-09 10:45:00	782.8	886.067	77.9333	13.82	834.933	58.4	20.2847
2019-01-09 11:00:00	842.4	912.4	85.8	14.1667	835	56.4067	21.9313
2019-01-09 11:15:00	847.733	874.933	89.1333	14.0933	835	55.7667	21.814
2019-01-09 11:30:00	955.333	939	98.9333	14.6	834.953	54.3067	24.5173
2019-01-09 11:45:00	995.133	947.4	104.133	14.8867	834.793	52.9267	25.572
2019-01-09 12:00:00	1044.8	968.2	109.2	15.2667	834.6	51.8267	25.5073
2019-01-09 12:15:00	884.533	763.4	114.133	15.52	834.4	50.3267	18.624
2019-01-09 12:30:00	977.333	809.133	119.467	16.02	834.007	48.3	23.1807
2019-01-09 12:45:00	773.533	617.067	129.867	16.0133	833.78	48.4467	19.408
2019-01-09 13:00:00	1072.87	928.933	129.867	16.7467	833.453	45.1933	27.1007
2019-01-09 13:15:00	1054.33	877.667	141.067	16.7133	833.133	44.9333	28.904
2019-01-09 13:30:00	962.267	803.2	162.867	17.1267	832.667	43.0867	26.05
2019-01-09 13:45:00	1215.07	1076.2	133.733	17.3733	832.28	42.1867	27.9227
2019-01-09 14:00:00	1128.07	947.267	125.533	17.6667	831.953	40.9667	26.4247
2019-01-09 14:15:00	1164.53	972.533	118.133	17.7067	831.713	40.92	28.58
2019-01-09 14:30:00	1101.27	936.2	111	18.3733	831.267	38.7067	27.224
2019-01-09 14:45:00	1063.73	942	108.667	18.2867	830.827	38.64	26.596
2019-01-09 15:00:00	1022.13	944.067	105.267	18.3667	830.7	37.7733	25.8433
2019-01-09 15:15:00	980.933	946.467	101.533	18.3733	830.673	37.5933	25.1007
2019-01-09 15:30:00	939.8	950.6	97.1333	18.6	830.5	37.0867	24.1813
2019-01-09 15:45:00	885.733	936.4	90.4667	18.8467	830.473	36.48	23.0027
2019-01-09 16:00:00	846	928.533	84	18.7867	830.253	36.62	21.794
2019-01-09 16:15:00	787.6	892.267	75	18.7867	830.24	36.3533	20.1093
2019-01-09 16:30:00	724.333	842.133	64.6	19.3	830	34.8267	17.686
2019-01-09 16:45:00	400.733	301.267	112.8	18.58	829.893	35.3933	10.0373
2019-01-09 17:00:00	234.4	178.267	76.6667	17.4933	830.2	37.5267	6.402
2019-01-09 17:15:00	345.867	33.9333	155.6	17.1133	830.12	38.5867	8.47667
2019-01-09 17:30:00	416.733	27.5333	165.867	17.8933	830.147	36.9	8.58867
2019-01-09 17:45:00	328.267	1.33333	124.467	17.9267	830.12	36.5267	5.45267
2019-01-09 18:00:00	162.067	1.46667	60.6667	17.38	830.053	37.4067	3.36133
2019-01-09 18:15:00	62.8667	5.66667	24.8667	16.9733	830.107	38.26	1.05
2019-01-09 18:30:00	53.3333	0.333333	14.4667	16.7933	830.253	38.5267	0.822
2019-01-09 18:45:00	0.933333	0	0	16.5733	830.413	37.9733	0
2019-01-09 19:00:00	0	0	0	16.28	830.393	38.5333	0
2019-01-09 19:15:00	0	0	0	16.1533	830.527	39.0333	0
2019-01-09 19:30:00	0	0	0	16.08	830.747	39.52	0
2019-01-09 19:45:00	0	0	0	15.8467	830.827	40.1533	0
2019-01-09 20:00:00	0	0	0	15.7467	831.047	40.5933	0
2019-01-09 20:15:00	0	0	0	15.6067	831.233	41.2	0
2019-01-09 20:30:00	0	0	0	15.5067	831.333	41.9	0
2019-01-09 20:45:00	0	0	0	15.42	831.76	42.7133	0
2019-01-09 21:00:00	0	0	0	15.2067	831.893	43.4133	0
2019-01-09 21:15:00	0	0	0	15.0933	832.08	43.5	0
2019-01-09 21:30:00	0	0	0	14.8933	832.1	44.28	0
2019-01-09 21:45:00	0	0	0	14.6533	832.26	45.08	0
2019-01-09 22:00:00	0	0	0	14.52	832.253	45.4267	0
2019-01-09 22:15:00	0	0	0	14.4	832.373	46.2667	0
2019-01-09 22:30:00	0	0	0	14.26	832.453	46.8533	0
2019-01-09 22:45:00	0	0	0	14.12	832.52	47.44	0
2019-01-09 23:00:00	0	0	0	14.1333	832.707	47.3867	0
2019-01-09 23:15:00	0	0	0	13.9867	832.64	48.6933	0
2019-01-09 23:30:00	0	0	0	13.8933	832.807	49.3	0
2019-01-09 23:45:00	0	0	0	13.7533	832.793	50.42	0
2019-01-10	0	0	0	13.7133	832.853	51.1933	0
2019-01-10 00:15:00	0	0	0	13.6067	832.893	51.7667	0
2019-01-10 00:30:00	0	0	0	13.5667	832.953	51.9933	0
2019-01-10 00:45:00	0	0	0	13.52	832.753	51.7533	0
2019-01-10 01:00:00	0	0	0	13.5067	832.8	51.6467	0
2019-01-10 01:15:00	0	0	0	13.1533	832.8	54.0867	0
2019-01-10 01:30:00	0	0	0	13.16	832.847	54.48	0
2019-01-10 01:45:00	0	0	0	12.98	832.913	55.92	0
2019-01-10 02:00:00	0	0	0	12.9067	832.767	56.3733	0
2019-01-10 02:15:00	0	0	0	12.6133	832.647	57.8	0
2019-01-10 02:30:00	0	0	0	12.72	832.553	57.94	0
2019-01-10 02:45:00	0	0	0	12.7067	832.647	59.38	0
2019-01-10 03:00:00	0	0	0	12.64	832.74	60.7533	0
2019-01-10 03:15:00	0	0	0	12.2533	832.82	64.1067	0
2019-01-10 03:30:00	0	0	0	11.26	832.487	72.0533	0
2019-01-10 03:45:00	0	0	0	11.0733	832.7	71.6333	0
2019-01-10 04:00:00	0	0	0	11.3533	832.7	68.68	0
2019-01-10 04:15:00	0	0	0	11.44	832.687	67.0333	0
2019-01-10 04:30:00	0	0	0	11.3333	832.553	67.0867	0
2019-01-10 04:45:00	0	0	0	11.1267	832.433	66.9533	0
2019-01-10 05:00:00	0	0	0	11.1067	832.453	66.52	0
2019-01-10 05:15:00	0	0	0	11.0533	832.44	66.2933	0
2019-01-10 05:30:00	0	0	0	10.9933	832.2	66.1	0
2019-01-10 05:45:00	0	0	0	11.0533	832.267	65.4867	0
2019-01-10 06:00:00	0	0	0	11.0333	832.2	65.3	0
2019-01-10 06:15:00	0	0	0	11.0733	832.067	64.82	0
2019-01-10 06:30:00	0	0	0	11.18	832.247	63.8267	0
2019-01-10 06:45:00	0	0	0	11	832.46	64.0933	0
2019-01-10 07:00:00	0	0	0	10.9867	832.547	63.8267	0
2019-01-10 07:15:00	0	0	0	10.9867	832.76	63.44	0
2019-01-10 07:30:00	0	0	0	10.84	832.94	63.8733	0
2019-01-10 07:45:00	0	0	0	10.7867	833.1	64.2333	0
2019-01-10 08:00:00	0	0	0	10.6467	833.1	64.8	0
2019-01-10 08:15:00	2.53333	0.466667	0.266667	10.6067	833.113	64.4467	0.024
2019-01-10 08:30:00	37.3333	24.8667	12.1333	10.7333	833.293	63.8467	0.63
2019-01-10 08:45:00	212.4	137.333	58.0667	11.3333	833.427	61.6333	2.92267
2019-01-10 09:00:00	315.8	8.8	106.133	11.74	833.647	60.2933	5.188
2019-01-10 09:15:00	419.933	0	164.2	11.98	833.78	59.8	7.70667
2019-01-10 09:30:00	511.267	180.8	159.667	12.64	833.8	57.2867	10.2813
2019-01-10 09:45:00	546.2	416.133	113.533	12.8533	833.893	57.18	12.1033
2019-01-10 10:00:00	275.733	170.933	81.9333	12.7733	834	57.1867	6.68067
2019-01-10 10:15:00	438.267	355.2	111.733	12.2333	834.173	59.58	10.9127
2019-01-10 10:30:00	636.733	675.6	66.8	12.82	834.347	58.5133	17.0007
2019-01-10 10:45:00	772.733	876.2	77.0667	13.9333	834.24	54.4867	20.218
2019-01-10 11:00:00	834.333	904	85.2667	14.3333	834.293	53.4133	21.656
2019-01-10 11:15:00	895	919.267	92.1333	14.52	834.213	53.1733	22.9113
2019-01-10 11:30:00	945.733	932.6	98.3333	14.9867	833.953	51.4667	24.046
2019-01-10 11:45:00	978.133	929.533	102.467	15.2467	833.82	49.9867	24.9633
2019-01-10 12:00:00	1006.67	927.467	105.867	15.62	833.613	47.58	25.8313
2019-01-10 12:15:00	1035.53	927.133	109.133	15.8733	833.293	46.72	26.5533
2019-01-10 12:30:00	1058.93	923.4	111.267	16.5733	833.007	43.52	27.112
2019-01-10 12:45:00	1073.6	928.333	113.733	16.9467	832.727	41.8467	27.4907
2019-01-10 13:00:00	936.667	754.733	134.2	17.3267	832.507	40.2867	26.2947
2019-01-10 13:15:00	965.867	811.867	124.733	17.06	832.267	40.54	25.6033
2019-01-10 13:30:00	1145.6	1068.93	133.667	17.76	831.807	38.5	29.1253
2019-01-10 13:45:00	1114.6	1019.47	125.2	18.0067	831.433	36.7067	26.6207
2019-01-10 14:00:00	852.533	699.333	126.667	18.0667	831.06	36.4	20.7693
2019-01-10 14:15:00	836.2	663.533	118.933	17.5067	830.86	37.5133	22.1673
2019-01-10 14:30:00	1080.07	924.2	109.933	18.8667	830.553	34.68	27.118
2019-01-10 14:45:00	941.667	797.133	123.6	18.2667	830.313	34.92	22.5727
2019-01-10 15:00:00	932.533	870.667	109.8	18.52	830.053	33.5333	22.4867
2019-01-10 15:15:00	966.733	977.333	107.133	19.6067	829.827	31.0467	24.1033
2019-01-10 15:30:00	763.533	779.333	127.6	18.9667	829.653	30.7867	18.4847
2019-01-10 15:45:00	830.067	907.667	101.933	18.9067	829.52	30.3333	19.9967
2019-01-10 16:00:00	804.733	926.867	86.1333	19.6533	829.5	28.5267	19.4253
2019-01-10 16:15:00	562.6	547.4	139.4	18.9	829.5	28.9067	13.2707
2019-01-10 16:30:00	264	120.6	158.8	18.5267	829.453	30.66	9.03067
2019-01-10 16:45:00	450.333	410.667	131.4	18.8667	829.387	28.7933	12.1927
2019-01-10 17:00:00	389.733	324.933	123	18.9333	829.3	27.92	9.60667
2019-01-10 17:15:00	477.933	71.5333	231.2	18.9667	829.233	26.7733	10.8027
2019-01-10 17:30:00	417.733	80.2	180.533	19.1667	829.3	25.4733	9.09267
2019-01-10 17:45:00	317.933	41.2	136.333	19.0133	829.38	25.5867	6.52667
2019-01-10 18:00:00	255.067	32.4	102.2	18.6467	829.447	25.58	5.026
2019-01-10 18:15:00	168.267	96.0667	65.1333	18.3467	829.5	23.9	3.17933
2019-01-10 18:30:00	28.7333	3.06667	12.8667	17.5667	829.593	23.7333	0.628667
2019-01-10 18:45:00	0.333333	0.0666667	0	17.0467	829.793	24.2133	0
2019-01-10 19:00:00	0	0	0	16.7133	830.04	24.6667	0
2019-01-10 19:15:00	0	0	0	16.5333	830.293	24.9533	0
2019-01-10 19:30:00	0	0	0	16.4067	830.4	25.32	0
2019-01-10 19:45:00	0	0	0	16.3733	830.453	25.5267	0
2019-01-10 20:00:00	0	0	0	16.2	830.847	26.5867	0
2019-01-10 20:15:00	0	0	0	16.1267	830.993	27.64	0
2019-01-10 20:30:00	0	0	0	16.0133	831.1	27.9867	0
2019-01-10 20:45:00	0	0	0	15.84	831.193	28.2867	0
2019-01-10 21:00:00	0	0	0	15.5667	831.347	29.4867	0
2019-01-10 21:15:00	0	0	0	15.4267	831.147	30.56	0
2019-01-10 21:30:00	0	0	0	15.4533	831.093	31.0067	0
2019-01-10 21:45:00	0	0	0	15.3333	831.373	32.08	0
2019-01-10 22:00:00	0	0	0	15.0333	831.5	33.4933	0
2019-01-10 22:15:00	0	0	0	14.62	831.753	34.94	0
2019-01-10 22:30:00	0	0	0	14.4267	831.947	35.7333	0
2019-01-10 22:45:00	0	0	0	14.38	832.267	36.1067	0
2019-01-10 23:00:00	0	0	0	14.32	832.5	36.44	0
2019-01-10 23:15:00	0	0	0	14.1933	832.513	37.16	0
2019-01-10 23:30:00	0	0	0	14.0667	832.647	37.5733	0
2019-01-10 23:45:00	0	0	0	14.02	832.927	37.6667	0
2019-01-11	0	0	0	13.94	832.947	37.84	0
2019-01-11 00:15:00	0	0	0	13.8533	833.16	37.9867	0
2019-01-11 00:30:00	0	0	0	13.6333	833.2	38.38	0
2019-01-11 00:45:00	0	0	0	13.66	833.067	38.14	0
2019-01-11 01:00:00	0	0	0	13.4667	833.2	38.3933	0
2019-01-11 01:15:00	0	0	0	13.3267	833.427	38.7133	0
2019-01-11 01:30:00	0	0	0	13.1733	833.447	38.88	0
2019-01-11 01:45:00	0	0	0	13.2	833.58	38.64	0
2019-01-11 02:00:00	0	0	0	12.9267	833.693	39.2067	0
2019-01-11 02:15:00	0	0	0	12.8733	833.867	39.06	0
2019-01-11 02:30:00	0	0	0	12.68	833.847	39.3467	0
2019-01-11 02:45:00	0	0	0	12.8133	833.967	38.5133	0
2019-01-11 03:00:00	0	0	0	12.9533	833.76	37.72	0
2019-01-11 03:15:00	0	0	0	12.42	833.653	38.88	0
2019-01-11 03:30:00	0	0	0	12.62	833.5	38.12	0
2019-01-11 03:45:00	0	0	0	12.42	833.593	38.5133	0
2019-01-11 04:00:00	0	0	0	12.2467	833.7	38.74	0
2019-01-11 04:15:00	0	0	0	11.8333	833.633	39.6533	0
2019-01-11 04:30:00	0	0	0	11.88	833.653	39.36	0
2019-01-11 04:45:00	0	0	0	12.02	833.76	38.7	0
2019-01-11 05:00:00	0	0	0	11.9467	833.753	38.6933	0
2019-01-11 05:15:00	0	0	0	11.8867	833.607	38.54	0
2019-01-11 05:30:00	0	0	0	11.9	833.5	38.3933	0
2019-01-11 05:45:00	0	0	0	11.8267	833.513	38.28	0
2019-01-11 06:00:00	0	0	0	11.56	833.647	38.8067	0
2019-01-11 06:15:00	0	0	0	11.2133	833.727	39.6333	0
2019-01-11 06:30:00	0	0	0	10.8333	833.993	40.1867	0
2019-01-11 06:45:00	0	0	0	11.3133	834.273	38.3467	0
2019-01-11 07:00:00	0	0	0	11.08	834.447	38.62	0
2019-01-11 07:15:00	0	0	0	10.3467	834.66	40.8	0
2019-01-11 07:30:00	0	0	0	10.54	834.793	39.9267	0
2019-01-11 07:45:00	0	0	0	11.2067	834.913	35.2467	0
2019-01-11 08:00:00	0	0	0	11.1067	835.047	34.5933	0
2019-01-11 08:15:00	3.46667	0.533333	0.466667	10.6133	835.207	36.86	0.0733333
2019-01-11 08:30:00	36.6667	14.4	11.5333	9.83333	835.447	42.1867	0.662
2019-01-11 08:45:00	203.733	130.6	56.6	10.3267	835.753	42.5133	2.878
2019-01-11 09:00:00	310.067	6.93333	105.6	11.8333	835.947	37.0333	5.16667
2019-01-11 09:15:00	422.067	0	166.133	11.9867	835.933	36.7	7.744
2019-01-11 09:30:00	513	173.6	162.333	12.8733	836.047	34.3067	10.3233
2019-01-11 09:45:00	581.533	419.067	128.2	13.34	836.167	33.32	12.644
2019-01-11 10:00:00	641	592.8	98.0667	13.9267	836.193	32.1867	14.78
2019-01-11 10:15:00	687.133	788.867	58.2667	14.1867	836.393	32.6467	16.69
2019-01-11 10:30:00	729.333	840.333	68.2	13.2533	836.5	35.2933	18.47
2019-01-11 10:45:00	781.933	884.667	77.8667	13.5933	836.513	34.9067	20.1253
2019-01-11 11:00:00	844.133	912.467	86.2	13.9	836.647	34.9867	21.6273
2019-01-11 11:15:00	905	927.733	93.2	14.06	836.633	34.8867	22.8827
2019-01-11 11:30:00	951.333	933.6	98.6667	14.4133	836.653	33.9867	24.044
2019-01-11 11:45:00	990.2	939.733	103.8	14.6467	836.493	33.68	25.0607
2019-01-11 12:00:00	1018.93	939.867	107.667	14.7333	836.207	34.46	25.886
2019-01-11 12:15:00	1045	936.067	110.4	15.3333	836.007	31.9733	26.6207
2019-01-11 12:30:00	1065.07	927.8	112	15.76	835.807	27.78	27.0667
2019-01-11 12:45:00	1074.07	922.067	113.2	16.0933	835.593	26.6067	27.4873
2019-01-11 13:00:00	1074.93	916.2	113.8	16.2333	835.213	25.88	27.656
2019-01-11 13:15:00	1075.07	915.067	114.733	17.1267	834.827	25.14	27.7627
2019-01-11 13:30:00	1101.33	998.867	125.467	16.7533	834.56	24.7333	27.8507
2019-01-11 13:45:00	1098.4	958.667	119.867	17.0733	834.213	24.3133	27.576
2019-01-11 14:00:00	1088.2	901.533	111.467	17.4467	833.953	23.8867	27.1907
2019-01-11 14:15:00	1083.4	902.867	110.067	17.5067	833.567	23.6	26.878
2019-01-11 14:30:00	1063	906.533	108.2	17.3667	833.353	24.3533	26.4553
2019-01-11 14:45:00	1024.07	905.333	105.267	17.7467	833.193	23.76	25.6633
2019-01-11 15:00:00	990.2	912.2	102.667	18.9	832.907	21.8467	25.0367
2019-01-11 15:15:00	944.467	907.267	98.2	18.92	832.627	22.3	24.158
2019-01-11 15:30:00	907.867	913.867	94.1333	18.32	832.407	23.1733	23.1627
2019-01-11 15:45:00	871.133	918.667	89.7333	18.4133	832.233	22.5133	22.166
2019-01-11 16:00:00	805.4	886.133	81.0667	18.6133	832.253	22.1933	20.6393
2019-01-11 16:15:00	749.467	851.8	72.3333	18.8667	832.133	21.9667	18.8533
2019-01-11 16:30:00	662.333	778.4	60.5333	18.9067	832.153	21.6933	16.4153
2019-01-11 16:45:00	588.867	547.267	113.667	18.8067	832.02	21.5733	13.9667
2019-01-11 17:00:00	508.467	32.4667	252.133	18.8067	831.907	21.92	11.948
2019-01-11 17:15:00	457.733	35.7333	204.2	18.6933	831.88	22.56	10.2647
2019-01-11 17:30:00	400.6	32.6	159.4	19.0067	831.947	22.1533	8.48533
2019-01-11 17:45:00	330.067	2.13333	121.667	18.94	832	22.5667	6.71333
2019-01-11 18:00:00	239.267	0	82.4	18.4533	832	23.4	4.55267
2019-01-11 18:15:00	132.6	6	40.2667	18.8533	831.947	23.1267	2.328
2019-01-11 18:30:00	45.1333	0	8.86667	18.2733	832.053	24.1067	0.708667
2019-01-11 18:45:00	0	0	0	16.6267	832.24	27.0867	0
2019-01-11 19:00:00	0	0	0	15.6133	832.3	29.28	0
2019-01-11 19:15:00	0	0	0	15.16	832.46	30.0867	0
2019-01-11 19:30:00	0	0	0	15.3133	832.5	29.3733	0
2019-01-11 19:45:00	0	0	0	15.3667	832.5	28.9933	0
2019-01-11 20:00:00	0	0	0	15.2933	832.453	29.1067	0
2019-01-11 20:15:00	0	0	0	15.1733	832.547	28.98	0
2019-01-11 20:30:00	0	0	0	15.3067	832.593	28.4533	0
2019-01-11 20:45:00	0	0	0	15.18	832.807	28.38	0
2019-01-11 21:00:00	0	0	0	14.6733	833	29.52	0
2019-01-11 21:15:00	0	0	0	14.2533	832.987	30.56	0
2019-01-11 21:30:00	0	0	0	13.62	832.853	32.6867	0
2019-01-11 21:45:00	0	0	0	13.2867	832.96	33.4733	0
2019-01-11 22:00:00	0	0	0	13.12	833	33.9067	0
2019-01-11 22:15:00	0	0	0	13.02	833	34.6	0
2019-01-11 22:30:00	0	0	0	13.0333	833	34.8067	0
2019-01-11 22:45:00	0	0	0	12.8467	833.093	35.3667	0
2019-01-11 23:00:00	0	0	0	12.6	833.2	36.1467	0
2019-01-11 23:15:00	0	0	0	13.34	833.36	34.9333	0
2019-01-11 23:30:00	0	0	0	13.76	833.353	34.1133	0
2019-01-11 23:45:00	0	0	0	13.8467	833.473	33.9267	0
2019-01-12	0	0	0	13.8667	833.553	34.9133	0
2019-01-12 00:15:00	0	0	0	13.42	833.57	35.75	0
2019-01-12 00:30:00	0	0	0	13.4867	833.6	36.7067	0
2019-01-12 00:45:00	0	0	0	13.2267	833.6	37.8733	0
2019-01-12 01:00:00	0	0	0	13.2867	833.553	38.6067	0
2019-01-12 01:15:00	0	0	0	13.38	833.567	39.1	0
2019-01-12 01:30:00	0	0	0	13.48	833.5	39.84	0
2019-01-12 01:45:00	0	0	0	13.4533	833.5	40.9333	0
2019-01-12 02:00:00	0	0	0	13.32	833.453	42.7733	0
2019-01-12 02:15:00	0	0	0	13.3333	833.24	43.9333	0
2019-01-12 02:30:00	0	0	0	13.22	833.2	44.5467	0
2019-01-12 02:45:00	0	0	0	13.0467	833.36	45.0533	0
2019-01-12 03:00:00	0	0	0	12.92	833.4	45.7467	0
2019-01-12 03:15:00	0	0	0	12.9867	833.387	46.14	0
2019-01-12 03:30:00	0	0	0	12.8	833.3	47.06	0
2019-01-12 03:45:00	0	0	0	12.6133	833.353	48.44	0
2019-01-12 04:00:00	0	0	0	12.44	833.247	49.4867	0
2019-01-12 04:15:00	0	0	0	12.4667	833.3	50.4667	0
2019-01-12 04:30:00	0	0	0	12.32	833.28	51.95	0
2019-01-12 04:45:00	0	0	0	12.11	833.27	52.98	0
2019-01-12 05:00:00	0	0	0	11.82	833.253	53.9933	0
2019-01-12 05:15:00	0	0	0	11.9467	833.293	53.5667	0
2019-01-12 05:30:00	0	0	0	11.8333	833.4	53.5267	0
2019-01-12 05:45:00	0	0	0	11.5133	833.333	54.1533	0
2019-01-12 06:00:00	0	0	0	11.7067	833.4	54.5533	0
2019-01-12 06:15:00	0	0	0	11.5533	833.493	55.8333	0
2019-01-12 06:30:00	0	0	0	11.6133	833.647	56.56	0
2019-01-12 06:45:00	0	0	0	11.4067	833.553	57.1733	0
2019-01-12 07:00:00	0	0	0	11.38	833.6	57.2467	0
2019-01-12 07:15:00	0	0	0	11.2467	833.76	57.4333	0
2019-01-12 07:30:00	0	0	0	11.04	833.893	57.7667	0
2019-01-12 07:45:00	0	0	0	11.06	834.013	57.4267	0
2019-01-12 08:00:00	0	0	0	10.78	834.193	58.5333	0
2019-01-12 08:15:00	2.46667	0.4	0.2	10.5733	834.393	59.0667	0.028
2019-01-12 08:30:00	36.4667	24.9333	11.8667	10.48	834.64	59.6733	0.639333
2019-01-12 08:45:00	197.8	159.2	53.8	10.77	834.94	59.42	2.611
2019-01-12 09:00:00	319.2	7.86667	108.8	11.64	835.147	56.3	5.236
2019-01-12 09:15:00	425	0	168	12.1	835.2	54.5933	7.77267
2019-01-12 09:30:00	516.533	176.267	164.6	12.7733	835.247	52.3733	10.3513
2019-01-12 09:45:00	586.267	430.267	128.533	12.6533	835.393	52.6067	12.6513
2019-01-12 10:00:00	643.333	596.933	99	12.54	835.5	53.0667	14.8093
2019-01-12 10:15:00	689.333	794.867	58.6667	12.7667	835.593	53.1	16.7953
2019-01-12 10:30:00	734.4	847.733	69	13.22	835.7	52.06	18.594
2019-01-12 10:45:00	786.8	892.467	78.8	13.5867	835.687	50.6267	20.31
2019-01-12 11:00:00	850.2	922	87.3333	14.12	835.6	48.92	21.8247
2019-01-12 11:15:00	913.933	939	94.4	14.32	835.493	48.2867	23.1873
2019-01-12 11:30:00	965.467	947.8	100.4	14.1667	835.3	48.88	24.3967
2019-01-12 11:45:00	999.6	948.8	105	14.6733	835.18	47.46	25.4667
2019-01-12 12:00:00	1029	949.267	108.933	15.3333	834.947	43.2467	26.402
2019-01-12 12:15:00	1057.67	947.733	112.067	15.8867	834.733	39.6333	27.196
2019-01-12 12:30:00	1081.53	941.467	114.067	16.56	834.5	37.1533	27.7607
2019-01-12 12:45:00	1092.33	936.6	115.467	17.2067	834.247	34.28	28.1327
2019-01-12 13:00:00	1089.73	928.267	115.867	17.22	834.053	31.7133	28.184
2019-01-12 13:15:00	1085.2	921.533	115.733	17.46	833.72	29.4267	28.0373
2019-01-12 13:30:00	1095.53	990.067	124.6	17.3133	833.26	29.6467	27.9327
2019-01-12 13:45:00	1099.13	962.2	120.6	17.6933	832.913	31.3133	27.884
2019-01-12 14:00:00	1100.53	910.067	113.067	18.0133	832.607	31.9	27.4973
2019-01-12 14:15:00	1091.6	907.867	111.067	18.3933	832.313	30.2	27.134
2019-01-12 14:30:00	1058.2	901.733	107.933	19.0067	832.033	29.4267	26.4773
2019-01-12 14:45:00	1033.2	913.467	106.733	19.0267	831.82	29.2333	25.996
2019-01-12 15:00:00	992.733	914.2	103.133	19.2133	831.46	29.16	25.3167
2019-01-12 15:15:00	953.333	917.8	99.5333	19.36	831.3	28.4667	24.438
2019-01-12 15:30:00	907.533	914.267	94.8667	19.8933	831.273	27.5133	23.292
2019-01-12 15:45:00	855.467	902.667	88.6667	20.3933	831.08	25.9867	22.0867
2019-01-12 16:00:00	807.4	885.8	81.6	20.1867	831.067	25.9667	20.742
2019-01-12 16:15:00	758.733	859.467	73.4667	20.5933	831	25.1467	19.2547
2019-01-12 16:30:00	707.467	821.267	64.2	20.5933	830.973	24.8267	17.556
2019-01-12 16:45:00	645.933	761.4	53.8	20.5733	830.96	24.68	15.664
2019-01-12 17:00:00	582.333	165	231.333	20.92	830.813	23.78	13.5393
2019-01-12 17:15:00	505.8	28.4	221.467	20.62	830.74	24.08	11.2367
2019-01-12 17:30:00	433.067	32.0667	170.267	20.6133	830.793	23.8733	9.15867
2019-01-12 17:45:00	350.467	3.66667	127.8	20.4933	830.8	23.7667	7.06067
2019-01-12 18:00:00	260.467	0	88.9333	20.2867	830.827	23.6	4.93133
2019-01-12 18:15:00	144.867	9.2	44.4667	20.0467	830.9	23.8267	2.58667
2019-01-12 18:30:00	65.2667	0.133333	15.6667	19.0933	830.833	24.7533	1.018
2019-01-12 18:45:00	0.8	0	0	18.68	830.9	24.72	0.0113333
2019-01-12 19:00:00	0	0	0	18.38	831.087	24.6867	0
2019-01-12 19:15:00	0	0	0	18.1067	831.16	24.7	0
2019-01-12 19:30:00	0	0	0	17.9133	831.347	24.1933	0
2019-01-12 19:45:00	0	0	0	17.7	831.5	23.14	0
2019-01-12 20:00:00	0	0	0	17.8867	831.647	20.8467	0
2019-01-12 20:15:00	0	0	0	18.1	831.8	19.2933	0
2019-01-12 20:30:00	0	0	0	17.82	831.893	19.3333	0
2019-01-12 20:45:00	0	0	0	17.92	831.96	18.5	0
2019-01-12 21:00:00	0	0	0	17.7867	832.093	18.3	0
2019-01-12 21:15:00	0	0	0	17.8667	832.16	17.8867	0
2019-01-12 21:30:00	0	0	0	17.48	832.227	18.5133	0
2019-01-12 21:45:00	0	0	0	17.38	832.3	18.7267	0
2019-01-12 22:00:00	0	0	0	17.46	832.367	18.8733	0
2019-01-12 22:15:00	0	0	0	17.24	832.36	19.6467	0
2019-01-12 22:30:00	0	0	0	17.1733	832.333	20.1733	0
2019-01-12 22:45:00	0	0	0	16.82	832.46	20.9067	0
2019-01-12 23:00:00	0	0	0	16.8733	832.5	20.7867	0
2019-01-12 23:15:00	0	0	0	16.6667	832.5	21.28	0
2019-01-12 23:30:00	0	0	0	16.3333	832.62	22.8667	0
2019-01-12 23:45:00	0	0	0	16.2733	832.76	24.1467	0
2019-01-13	0	0	0	16.04	832.933	25.4133	0
2019-01-13 00:15:00	0	0	0	15.6667	832.92	27.0733	0
2019-01-13 00:30:00	0	0	0	15.62	833	28.0333	0
2019-01-13 00:45:00	0	0	0	15.4467	833.06	29.3667	0
2019-01-13 01:00:00	0	0	0	15.34	833.153	30.14	0
2019-01-13 01:15:00	0	0	0	15.08	833.18	31.18	0
2019-01-13 01:30:00	0	0	0	14.6267	833.193	32.2667	0
2019-01-13 01:45:00	0	0	0	14.6133	833.2	33.0067	0
2019-01-13 02:00:00	0	0	0	14.6067	833.2	33.3333	0
2019-01-13 02:15:00	0	0	0	14.4533	833.14	34.2867	0
2019-01-13 02:30:00	0	0	0	14.0933	833.22	35.6867	0
2019-01-13 02:45:00	0	0	0	14.0333	833.3	36.3733	0
2019-01-13 03:00:00	0	0	0	13.9933	833.367	36.7467	0
2019-01-13 03:15:00	0	0	0	13.8133	833.3	37.3	0
2019-01-13 03:30:00	0	0	0	13.72	833.3	37.7867	0
2019-01-13 03:45:00	0	0	0	13.4467	833.3	38.58	0
2019-01-13 04:00:00	0	0	0	13.14	833.367	39.5133	0
2019-01-13 04:15:00	0	0	0	13.06	833.3	39.7133	0
2019-01-13 04:30:00	0	0	0	13.12	833.073	39.4867	0
2019-01-13 04:45:00	0	0	0	12.8467	833.08	40.3267	0
2019-01-13 05:00:00	0	0	0	12.6533	833	40.96	0
2019-01-13 05:15:00	0	0	0	12.18	833.06	42.0467	0
2019-01-13 05:30:00	0	0	0	11.2467	833.127	44.7933	0
2019-01-13 05:45:00	0	0	0	10.5867	833.26	47.26	0
2019-01-13 06:00:00	0	0	0	11.1667	833.327	46.02	0
2019-01-13 06:15:00	0	0	0	11.64	833.34	44.4467	0
2019-01-13 06:30:00	0	0	0	11.84	833.42	44.0467	0
2019-01-13 06:45:00	0	0	0	11.8867	833.5	44.16	0
2019-01-13 07:00:00	0	0	0	11.8133	833.553	44.34	0
2019-01-13 07:15:00	0	0	0	11.6667	833.64	44.8933	0
2019-01-13 07:30:00	0	0	0	11.5467	833.787	45.3533	0
2019-01-13 07:45:00	0	0	0	11.62	833.86	45.14	0
2019-01-13 08:00:00	0	0	0	11.4133	833.98	45.6933	0
2019-01-13 08:15:00	2.06667	0.333333	0.133333	10.76	834.26	47.82	0.034
2019-01-13 08:30:00	33.6667	24.9333	10.8667	10.72	834.353	48.5467	0.599333
2019-01-13 08:45:00	211.133	133.067	58.9333	11.62	834.56	46.18	2.89667
2019-01-13 09:00:00	318.533	6.06667	108.6	12.4333	834.627	43.7867	5.19133
2019-01-13 09:15:00	429.6	0	170.4	13.1133	834.58	41.5333	7.84733
2019-01-13 09:30:00	526.4	176.6	168.4	13.3	834.5	41.06	10.486
2019-01-13 09:45:00	596.467	446.867	127.733	13.6667	834.44	40.1067	12.7993
2019-01-13 10:00:00	651.4	700	66.2667	13.3133	834.493	41.6467	14.9027
2019-01-13 10:15:00	692.333	799.133	59.0667	13.2467	834.62	41.9867	16.8293
2019-01-13 10:30:00	736.267	850.8	69.2667	13.2933	834.753	42.3333	18.6247
2019-01-13 10:45:00	783.133	890.6	78.7333	13.7467	834.96	41.9067	20.2
2019-01-13 11:00:00	846.2	919.333	87.2667	14.3267	834.787	40.74	21.6507
2019-01-13 11:15:00	909	934.467	94.2	15.12	834.64	38.9933	22.9047
2019-01-13 11:30:00	959.933	942.333	99.9333	15.12	834.547	38.9533	24.0553
2019-01-13 11:45:00	994.733	943.733	104.667	15.34	834.4	38.04	25.1313
2019-01-13 12:00:00	1023.53	943	108.467	15.3133	834.16	38.12	26.032
2019-01-13 12:15:00	1048.73	937.267	111.2	15.9533	834	36.5133	26.8053
2019-01-13 12:30:00	1073.87	933	113.333	16.82	833.76	32.86	27.4347
2019-01-13 12:45:00	1083.07	927.8	114.667	17.1733	833.36	31.1	27.7813
2019-01-13 13:00:00	1083.8	921.933	115.333	17.3933	832.987	30.4933	27.9727
2019-01-13 13:15:00	1088.47	923.467	116.4	17.5467	832.78	29.9133	27.9587
2019-01-13 13:30:00	1108.4	996.4	125.667	17.82	832.407	29.7867	27.92
2019-01-13 13:45:00	1118.4	981.933	123.6	18.4333	831.92	29.5067	27.904
2019-01-13 14:00:00	1120.13	923.8	115.133	18.9067	831.56	27.5267	27.736
2019-01-13 14:15:00	1121.13	929.333	114.2	19.42	831.28	24.28	27.562
2019-01-13 14:30:00	1098.27	931.333	112.067	19.6867	830.867	22.62	27.1593
2019-01-13 14:45:00	1070.13	940.4	110.2	20.14	830.58	21.82	26.706
2019-01-13 15:00:00	1020.53	935.133	106.067	20.2467	830.353	20.5667	25.7687
2019-01-13 15:15:00	974.267	935.133	102	20.7333	830.08	20.98	24.7447
2019-01-13 15:30:00	949.6	951.933	99.1333	20.9267	829.813	20.3533	24.1707
2019-01-13 15:45:00	893.333	937.6	92.5333	21.02	829.8	21.0133	22.9027
2019-01-13 16:00:00	847	923.467	85.3333	21.1067	829.653	20.98	21.6527
2019-01-13 16:15:00	797	898.133	77.1333	21.6333	829.5	19.8333	20.122
2019-01-13 16:30:00	701	811	63.6667	21.7067	829.407	19.5267	17.196
2019-01-13 16:45:00	681	753.4	71.9333	21.88	829.4	19.0067	16.3907
2019-01-13 17:00:00	574.8	264.733	193.2	21.96	829.16	18.3533	13.3387
2019-01-13 17:15:00	577	25.1333	246.333	22.32	829	17.7	12.7247
2019-01-13 17:30:00	502.067	30.2667	189.2	22.2733	828.907	17.7667	10.4873
2019-01-13 17:45:00	411.467	2.73333	142.667	22.1133	828.9	17.2667	8.196
2019-01-13 18:00:00	300	0	98.2	21.8133	828.807	17.0067	5.69
2019-01-13 18:15:00	188.867	16.1333	56.3333	21.7133	828.86	16.6067	3.35467
2019-01-13 18:30:00	76.2	0.333333	17.8	21.18	828.807	16.8067	1.17333
2019-01-13 18:45:00	1.66667	0	0	20.4933	828.86	17.38	0.00533333
2019-01-13 19:00:00	0	0	0	20.18	828.993	17.2333	0
2019-01-13 19:15:00	0	0	0	20	829.06	17.0533	0
2019-01-13 19:30:00	0	0	0	20.0667	829.127	16.28	0
2019-01-13 19:45:00	0	0	0	19.9	829.2	16.28	0
2019-01-13 20:00:00	0	0	0	19.7533	829.467	16.4467	0
2019-01-13 20:15:00	0	0	0	19.2533	829.64	17.3	0
2019-01-13 20:30:00	0	0	0	19.5467	829.587	16.9933	0
2019-01-13 20:45:00	0	0	0	19.4533	829.86	17.22	0
2019-01-13 21:00:00	0	0	0	19.4267	830.047	17.3667	0
2019-01-13 21:15:00	0	0	0	19.1067	830.2	18.1333	0
2019-01-13 21:30:00	0	0	0	18.98	830.347	18.6267	0
2019-01-13 21:45:00	0	0	0	18.9467	830.5	18.96	0
2019-01-13 22:00:00	0	0	0	18.38	830.5	20.0533	0
2019-01-13 22:15:00	0	0	0	18.32	830.62	20.5067	0
2019-01-13 22:30:00	0	0	0	18.3533	830.727	20.7667	0
2019-01-13 22:45:00	0	0	0	18.0667	830.8	21.48	0
2019-01-13 23:00:00	0	0	0	17.7267	830.893	22.4267	0
2019-01-13 23:15:00	0	0	0	17.7267	830.9	22.6933	0
2019-01-13 23:30:00	0	0	0	17.4467	830.833	23.4	0
2019-01-13 23:45:00	0	0	0	17.2667	830.9	23.86	0
2019-01-14	0	0	0	17.14	830.927	24.2333	0
2019-01-14 00:15:00	0	0	0	16.8867	830.88	24.72	0
2019-01-14 00:30:00	0	0	0	16.52	830.987	25.56	0
2019-01-14 00:45:00	0	0	0	16.4733	830.88	25.8933	0
2019-01-14 01:00:00	0	0	0	16.38	830.96	26.1	0
2019-01-14 01:15:00	0	0	0	16.0067	830.84	26.9667	0
2019-01-14 01:30:00	0	0	0	16.06	830.867	26.9333	0
2019-01-14 01:45:00	0	0	0	15.5333	830.86	28.12	0
2019-01-14 02:00:00	0	0	0	14.7933	830.967	30.4	0
2019-01-14 02:15:00	0	0	0	14.4933	830.9	31.46	0
2019-01-14 02:30:00	0	0	0	14.4933	830.807	31.5867	0
2019-01-14 02:45:00	0	0	0	13.7067	830.74	33.66	0
2019-01-14 03:00:00	0	0	0	13.2067	830.633	34.7267	0
2019-01-14 03:15:00	0	0	0	13.78	830.58	33.36	0
2019-01-14 03:30:00	0	0	0	13.5933	830.5	34.0533	0
2019-01-14 03:45:00	0	0	0	13.0533	830.5	35.4333	0
2019-01-14 04:00:00	0	0	0	12.9333	830.473	35.3267	0
2019-01-14 04:15:00	0	0	0	13.18	830.34	33.7733	0
2019-01-14 04:30:00	0	0	0	13.0533	830.273	34.54	0
2019-01-14 04:45:00	0	0	0	13.24	830.2	35.1533	0
2019-01-14 05:00:00	0	0	0	12.7733	830.2	37.2533	0
2019-01-14 05:15:00	0	0	0	12.9133	830.2	38.4667	0
2019-01-14 05:30:00	0	0	0	13.2	830.173	37.82	0
2019-01-14 05:45:00	0	0	0	13.2	830.1	37.5867	0
2019-01-14 06:00:00	0	0	0	13.1067	830.193	38.7267	0
2019-01-14 06:15:00	0	0	0	12.7867	830.32	40.4267	0
2019-01-14 06:30:00	0	0	0	13.1533	830.493	38.98	0
2019-01-14 06:45:00	0	0	0	12.7	830.56	38.9267	0
2019-01-14 07:00:00	0	0	0	12.9	830.653	39.7867	0
2019-01-14 07:15:00	0	0	0	13.28	830.8	39.8467	0
2019-01-14 07:30:00	0	0	0	13.08	830.92	40.1933	0
2019-01-14 07:45:00	0	0	0	12.84	831.12	40.7267	0
2019-01-14 08:00:00	0	0	0	12.6667	831.2	40.94	0
2019-01-14 08:15:00	1.4	0.333333	0.0666667	12.7667	831.32	41.1867	0.0113333
2019-01-14 08:30:00	32.6	23.1333	11	12.7533	831.493	42	0.629333
2019-01-14 08:45:00	219.333	138.667	61	13.3	831.5	41.12	3.052
2019-01-14 09:00:00	321.267	5.6	113.467	14.36	831.727	39.1333	5.37667
2019-01-14 09:15:00	440.533	0	179.667	14.8333	831.66	38.0533	8.152
2019-01-14 09:30:00	523	174.467	176.133	15.0267	831.793	37.7533	10.6027
2019-01-14 09:45:00	550.067	419.4	120.067	15.0867	831.8	37.62	11.84
2019-01-14 10:00:00	640.8	608.4	94.8667	14.6267	831.92	39.5667	14.5833
2019-01-14 10:15:00	694.933	805.6	59.6667	14.7667	832.12	39.5933	16.712
2019-01-14 10:30:00	732.733	851.267	69.2667	14.66	832.387	40.4133	18.3353
2019-01-14 10:45:00	780.333	889.933	78.8667	15.0867	832.307	40.48	19.9953
2019-01-14 11:00:00	845.667	920.933	87.4	15.68	832.2	38.94	21.7067
2019-01-14 11:15:00	911.467	938.067	94.7333	16.2667	832.173	37.5133	23.1553
2019-01-14 11:30:00	959.267	948.8	100.733	16.5333	832	36.6467	24.24
2019-01-14 11:45:00	986.4	946.667	105.2	16.9933	831.973	35.4267	25.1787
2019-01-14 12:00:00	996.533	935.6	107.6	17.3133	831.8	33.94	25.6433
2019-01-14 12:15:00	1046.2	949.933	112.933	17.6867	831.68	32.3	26.866
2019-01-14 12:30:00	1078.8	935.667	113.933	18.0333	831.26	31.4133	27.444
2019-01-14 12:45:00	1073.2	924.8	114.333	18.4867	831.007	30.1867	27.5553
2019-01-14 13:00:00	1103.4	945.933	118.867	18.8467	830.76	29.0667	28.3267
2019-01-14 13:15:00	983.133	835.533	104.6	19.1867	830.4	27.8467	25.328
2019-01-14 13:30:00	1113.2	990.6	124.333	19.3933	830.007	27.1667	28.3827
2019-01-14 13:45:00	1143.93	1004.6	126.933	19.8667	829.713	26.2533	28.6287
2019-01-14 14:00:00	1138.6	953.267	119.6	20.1267	829.313	25.76	28.1647
2019-01-14 14:15:00	1038.87	899.067	108.467	20.5133	828.993	25.14	26.0713
2019-01-14 14:30:00	1038	893.8	107.2	20.6667	828.66	23.9933	26.4173
2019-01-14 14:45:00	906.4	785.333	93.8	20.5667	828.347	23.7067	23.1447
2019-01-14 15:00:00	932.533	842.667	95.2	20.5867	828.113	22.2733	24.2193
2019-01-14 15:15:00	798	716.867	118.4	21.0933	828.007	22.8867	20.3233
2019-01-14 15:30:00	861.667	872.333	92.6	21.6267	827.833	22.4667	22.2007
2019-01-14 15:45:00	690.467	755.067	74.8667	21.48	827.753	22.7067	18.118
2019-01-14 16:00:00	678.867	748.2	88.6667	21.3667	827.767	22.54	17.9227
2019-01-14 16:15:00	551.6	521.8	121.667	21.14	827.747	22.2333	14.332
2019-01-14 16:30:00	392.867	158.2	200.067	20.7467	827.787	22.3533	10.616
2019-01-14 16:45:00	449.067	250.333	201.8	21.06	827.667	21.4667	12.2313
2019-01-14 17:00:00	484	285.133	176.2	21.2267	827.647	21.16	12.0347
2019-01-14 17:15:00	346.467	67.0667	181.533	21.2067	827.58	20.7267	8.21467
2019-01-14 17:30:00	218.067	71	120.333	20.9133	827.687	20.5533	5.444
2019-01-14 17:45:00	204.933	70.3333	107.6	20.5	827.76	20.44	5.04933
2019-01-14 18:00:00	294.333	13.6	121.667	20.9533	827.707	19.3467	6.19533
2019-01-14 18:15:00	102	11.2	38.6	20.5467	827.7	19.5333	2.06467
2019-01-14 18:30:00	40.8667	1.26667	13.2	19.9267	827.687	20.1133	0.786667
2019-01-14 18:45:00	3.46667	0.266667	0.866667	19.6067	827.84	20.4933	0.066
2019-01-14 19:00:00	0	0	0	19.5333	828.107	20.0067	0
2019-01-14 19:15:00	0	0	0	19.36	828.38	19.92	0
2019-01-14 19:30:00	0	0	0	19.3867	828.687	19.2933	0
2019-01-14 19:45:00	0	0	0	19.12	828.82	19.8	0
2019-01-14 20:00:00	0	0	0	18.9267	829.087	20.36	0
2019-01-14 20:15:00	0	0	0	18.7533	829.1	20.8267	0
2019-01-14 20:30:00	0	0	0	18.54	829.34	21.2133	0
2019-01-14 20:45:00	0	0	0	18.48	829.56	21.92	0
2019-01-14 21:00:00	0	0	0	18.2933	829.813	23.4133	0
2019-01-14 21:15:00	0	0	0	18.1733	829.96	24.5333	0
2019-01-14 21:30:00	0	0	0	17.8533	830.187	26.0333	0
2019-01-14 21:45:00	0	0	0	17.7133	830.26	26.8067	0
2019-01-14 22:00:00	0	0	0	17.56	830.327	27.2133	0
2019-01-14 22:15:00	0	0	0	17.3667	830.52	27.7467	0
2019-01-14 22:30:00	0	0	0	17.06	830.6	28.58	0
2019-01-14 22:45:00	0	0	0	16.7133	830.66	30.24	0
2019-01-14 23:00:00	0	0	0	16.4667	830.767	31.3533	0
2019-01-14 23:15:00	0	0	0	16.2533	830.82	31.9733	0
2019-01-14 23:30:00	0	0	0	16.16	830.953	31.9	0
2019-01-14 23:45:00	0	0	0	16.04	831.04	32.2067	0
2019-01-15	0	0	0	15.9733	831.027	32.3333	0
2019-01-15 00:15:00	0	0	0	15.6933	831.04	33.2133	0
2019-01-15 00:30:00	0	0	0	15.48	831.187	34.2067	0
2019-01-15 00:45:00	0	0	0	15.34	831.2	35.24	0
2019-01-15 01:00:00	0	0	0	15.18	831.2	36.0533	0
2019-01-15 01:15:00	0	0	0	14.96	831.2	36.7267	0
2019-01-15 01:30:00	0	0	0	15.0333	831.2	36.7	0
2019-01-15 01:45:00	0	0	0	14.9533	831.2	37.1267	0
2019-01-15 02:00:00	0	0	0	14.7533	831.213	37.54	0
2019-01-15 02:15:00	0	0	0	14.2667	831	38.6933	0
2019-01-15 02:30:00	0	0	0	14.2067	830.84	39.0267	0
2019-01-15 02:45:00	0	0	0	14.1	830.84	39.5933	0
2019-01-15 03:00:00	0	0	0	13.8333	830.853	40.9333	0
2019-01-15 03:15:00	0	0	0	13.8133	830.94	41.5	0
2019-01-15 03:30:00	0	0	0	13.7067	830.927	42.46	0
2019-01-15 03:45:00	0	0	0	13.42	830.94	43.88	0
2019-01-15 04:00:00	0	0	0	13.4133	830.873	44.72	0
2019-01-15 04:15:00	0	0	0	13.3867	830.74	45.6067	0
2019-01-15 04:30:00	0	0	0	13.2933	830.633	46.1067	0
2019-01-15 04:45:00	0	0	0	13.4533	830.58	46.0333	0
2019-01-15 05:00:00	0	0	0	13.0667	830.5	46.84	0
2019-01-15 05:15:00	0	0	0	13.24	830.56	46.3533	0
2019-01-15 05:30:00	0	0	0	13.0333	830.627	47.0667	0
2019-01-15 05:45:00	0	0	0	12.8067	830.7	48.0133	0
2019-01-15 06:00:00	0	0	0	12.52	830.793	49.14	0
2019-01-15 06:15:00	0	0	0	12.7267	830.86	49.5867	0
2019-01-15 06:30:00	0	0	0	12.8533	831.02	50.0133	0
2019-01-15 06:45:00	0	0	0	12.44	831.16	51.2467	0
2019-01-15 07:00:00	0	0	0	12.3933	831.36	52.0133	0
2019-01-15 07:15:00	0	0	0	12.22	831.42	52.32	0
2019-01-15 07:30:00	0	0	0	12.12	831.593	52.76	0
2019-01-15 07:45:00	0	0	0	12.0867	831.72	53.06	0
2019-01-15 08:00:00	0	0	0	12.2533	832.013	52.5	0
2019-01-15 08:15:00	5.4	1.06667	2.06667	12.14	832.22	52.4933	0.124
2019-01-15 08:30:00	27.5333	4.2	14.0667	12.16	832.447	52.3667	0.718
2019-01-15 08:45:00	66.8	7.6	30.4667	12.3467	832.6	51.64	1.466
2019-01-15 09:00:00	104.8	14.2667	45.9333	12.4	832.907	51.6933	2.174
2019-01-15 09:15:00	310.067	2.93333	133.333	12.9733	833.06	50.52	6.15533
2019-01-15 09:30:00	367.6	138.267	122.533	13.4933	833.22	49.2867	7.73333
2019-01-15 09:45:00	517.2	347.333	130.8	13.6933	833.36	49.1133	10.9467
2019-01-15 10:00:00	631.667	661.8	83.7333	14.86	833.627	45.76	14.6207
2019-01-15 10:15:00	620.467	659.4	98.6	15.02	833.56	44.5	15.0187
2019-01-15 10:30:00	631.867	641.6	103.6	14.28	833.76	47.0933	16.7147
2019-01-15 10:45:00	633.533	725.133	65.9333	14.5	833.64	46.16	16.4973
2019-01-15 11:00:00	731.533	795.867	75.4	14.72	833.787	45.3067	19.2727
2019-01-15 11:15:00	889	924.4	93.1333	15.1067	833.773	44.34	22.732
2019-01-15 11:30:00	978.333	984.267	104.467	15.84	833.58	42.5933	24.8887
2019-01-15 11:45:00	930.867	905	99.0667	15.9733	833.38	42.2933	23.3893
2019-01-15 12:00:00	905.933	843.533	98.2667	16.2133	833.24	39.8667	24.13
2019-01-15 12:15:00	940.533	842.533	100	16.2333	832.92	38.5	24.0287
2019-01-15 12:30:00	908	807	96	16.2	832.9	38.6	27.454
2019-01-15 12:45:00	908	807	96	16.2	832.9	38.6	28.0747
2019-01-15 13:00:00	908	807	96	16.2	832.9	38.6	28.43
2019-01-15 13:15:00	908	807	96	16.2	832.9	38.6	28.592
2019-01-15 13:30:00	908	807	96	16.2	832.9	38.6	27.624
2019-01-15 13:45:00	908	807	96	16.2	832.9	38.6	29.0807
2019-01-15 14:00:00	908	807	96	16.2	832.9	38.6	28.57
2019-01-15 14:15:00	908	807	96	16.2	832.9	38.6	28.1367
2019-01-15 14:30:00	908	807	96	16.2	832.9	38.6	24.2893
2019-01-15 14:45:00	908	807	96	16.2	832.9	38.6	26.724
2019-01-15 15:00:00	908	807	96	16.2	832.9	38.6	24.1187
2019-01-15 15:15:00	908	807	96	16.2	832.9	38.6	23.3313
2019-01-15 15:30:00	908	807	96	16.2	832.9	38.6	19.986
2019-01-15 15:45:00	908	807	96	16.2	832.9	38.6	7.346
2019-01-15 16:00:00	908	807	96	16.2	832.9	38.6	8.75867
2019-01-15 16:15:00	908	807	96	16.2	832.9	38.6	5.27933
2019-01-15 16:30:00	908	807	96	16.2	832.9	38.6	5.38267
2019-01-15 16:45:00	908	807	96	16.2	832.9	38.6	4.22933
2019-01-15 17:00:00	908	807	96	16.2	832.9	38.6	11.3687
2019-01-15 17:15:00	515.067	352.2	168.267	19.14	828.56	24.24	11.386
2019-01-15 17:30:00	510.6	80.4667	219.533	19.1933	828.52	23.58	10.22
2019-01-15 17:45:00	352.867	13.4	134.533	19.16	828.613	24.2467	6.86933
2019-01-15 18:00:00	236.667	0.466667	86.0667	18.7867	828.58	24.6933	4.31733
2019-01-15 18:15:00	117.4	21.4	40.4667	18.1667	828.58	25.16	2.48733
2019-01-15 18:30:00	85.0667	1.13333	25	18.0333	828.86	23.9067	1.34
2019-01-15 18:45:00	6	0.2	1	17.6467	828.993	23.74	0.0633333
2019-01-15 19:00:00	0	0	0	17.3933	829.12	23.4467	0
2019-01-15 19:15:00	0	0	0	17.18	829.347	24.2467	0
2019-01-15 19:30:00	0	0	0	17.2067	829.44	24.4467	0
2019-01-15 19:45:00	0	0	0	17.0267	829.8	24.68	0
2019-01-15 20:00:00	0	0	0	16.8933	830.02	25.36	0
2019-01-15 20:15:00	0	0	0	16.78	830.273	26.12	0
2019-01-15 20:30:00	0	0	0	16.5933	830.56	27.24	0
2019-01-15 20:45:00	0	0	0	16.48	830.493	27.48	0
2019-01-15 21:00:00	0	0	0	16.3533	830.88	28.5667	0
2019-01-15 21:15:00	0	0	0	16.2	831.053	28.8667	0
2019-01-15 21:30:00	0	0	0	16.0867	831.26	29.3133	0
2019-01-15 21:45:00	0	0	0	15.78	831.487	29.5333	0
2019-01-15 22:00:00	0	0	0	15.5867	831.56	29.66	0
2019-01-15 22:15:00	0	0	0	15.52	831.51	29.16	0
2019-01-15 22:30:00	0	0	0	15.4533	831.86	29.4867	0
2019-01-15 22:45:00	0	0	0	15.36	831.847	29.56	0
2019-01-15 23:00:00	0	0	0	15.1867	831.82	29.64	0
2019-01-15 23:15:00	0	0	0	15.0933	831.727	29.76	0
2019-01-15 23:30:00	0	0	0	14.96	831.94	29.8467	0
2019-01-15 23:45:00	0	0	0	14.8067	831.993	30.4333	0
2019-01-16	0	0	0	14.5786	832	31.2143	0
2019-01-16 00:15:00	0	0	0	14.22	832.12	32.14	0
2019-01-16 00:30:00	0	0	0	14	832.14	32.44	0
2019-01-16 00:45:00	0	0	0	13.8733	832.047	32.84	0
2019-01-16 01:00:00	0	0	0	13.9667	832.08	32.1467	0
2019-01-16 01:15:00	0	0	0	13.9067	832.107	32.0333	0
2019-01-16 01:30:00	0	0	0	13.5733	832.04	32.5733	0
2019-01-16 01:45:00	0	0	0	13.2667	832.093	33.3067	0
2019-01-16 02:00:00	0	0	0	13.26	832.04	33.4867	0
2019-01-16 02:15:00	0	0	0	13.1533	832.027	34.88	0
2019-01-16 02:30:00	0	0	0	13.2533	832.1	35.4267	0
2019-01-16 02:45:00	0	0	0	13.1933	832.127	35.5733	0
2019-01-16 03:00:00	0	0	0	12.9733	832.26	36.28	0
2019-01-16 03:15:00	0	0	0	12.9333	832.367	36.36	0
2019-01-16 03:30:00	0	0	0	12.8133	832.24	36.6667	0
2019-01-16 03:45:00	0	0	0	12.7333	832.107	36.56	0
2019-01-16 04:00:00	0	0	0	12.2733	832.16	37.98	0
2019-01-16 04:15:00	0	0	0	11.9333	832.253	39.5133	0
2019-01-16 04:30:00	0	0	0	11.9933	832.34	39.84	0
2019-01-16 04:45:00	0	0	0	12.1533	832.42	39.7333	0
2019-01-16 05:00:00	0	0	0	11.87	832.5	40.81	0
2019-01-16 05:15:00	0	0	0	11.9467	832.5	41.36	0
2019-01-16 05:30:00	0	0	0	11.8267	832.56	41.8133	0
2019-01-16 05:45:00	0	0	0	11.6133	832.507	42.5	0
2019-01-16 06:00:00	0	0	0	11.0533	832.56	44.1933	0
2019-01-16 06:15:00	0	0	0	10.3467	832.787	46.3467	0
2019-01-16 06:30:00	0	0	0	10.24	832.92	47.16	0
2019-01-16 06:45:00	0	0	0	10.02	833.187	47.98	0
2019-01-16 07:00:00	0	0	0	9.42667	833.32	49.5933	0
2019-01-16 07:15:00	0	0	0	9.18667	833.547	50.02	0
2019-01-16 07:30:00	0	0	0	8.76667	833.76	50.8533	0
2019-01-16 07:45:00	0	0	0	9.10667	834.04	50.6133	0
2019-01-16 08:00:00	0	0	0	8.94	834.38	50.8133	0
2019-01-16 08:15:00	3.73333	0.533333	0.8	8.38667	834.74	53.28	0.068
2019-01-16 08:30:00	30.0667	4	11.8667	8.70667	835.02	52.28	0.68
2019-01-16 08:45:00	154.867	85.2	49.6667	8.84	835.207	53.0267	2.39467
2019-01-16 09:00:00	256.6	9.6	96	9.97333	835.56	49.74	4.466
2019-01-16 09:15:00	356.533	0	149.533	10.4133	835.68	48.2333	6.83733
2019-01-16 09:30:00	455	152.533	154.133	11.58	835.84	45.8467	9.35667
2019-01-16 09:45:00	529.533	380.933	130	11.1267	835.947	47.2933	11.6853
2019-01-16 10:00:00	589	344.333	175.4	11.1667	836.16	46.0933	13.7947
2019-01-16 10:15:00	639.933	752.333	56.1333	12.34	836.227	42.8733	15.92
2019-01-16 10:30:00	689.467	805.6	66.1333	11.7667	836.42	46	17.766
2019-01-16 10:45:00	743.467	848.933	75.6	12.28	836.407	44.58	19.452
2019-01-16 11:00:00	807.467	879.133	84.0667	12.0467	836.34	44.34	20.904
2019-01-16 11:15:00	873.533	897.533	91.2	12.8067	836.367	43.1467	22.304
2019-01-16 11:30:00	905.8	888.267	94.8	12.9067	836.3	41.3	23.5647
2019-01-16 11:45:00	958.333	905.6	101.2	13.2333	836.367	40.0667	24.7693
2019-01-16 12:00:00	986.733	903.667	104.867	12.8933	836.3	41.3933	25.594
2019-01-16 12:15:00	1016	902.8	107.867	13.3533	836.06	41.4133	26.2867
2019-01-16 12:30:00	1050.47	905.8	111	14.0667	835.84	40.4	26.884
2019-01-16 12:45:00	1062.8	903.2	112.8	14.5067	835.653	38.9467	27.3613
2019-01-16 13:00:00	1077.2	910.133	114.867	14.8333	835.32	38.5333	27.8567
2019-01-16 13:15:00	1093.87	920.667	117.133	14.9733	834.96	37.8533	28.162
2019-01-16 13:30:00	1113.87	981.867	125.267	15.16	834.68	36.2	28.3807
2019-01-16 13:45:00	1123.87	973.933	123.933	15.62	834.48	31.2	28.302
2019-01-16 14:00:00	1130.8	922	116.067	15.66	834.28	31.2733	28.0807
2019-01-16 14:15:00	1130.13	925.4	114.933	16.02	834.013	29.2533	27.8607
2019-01-16 14:30:00	1126.47	943.4	114.8	16.4333	833.88	28.8333	27.6107
2019-01-16 14:45:00	1100.9	949.3	113.5	16.44	833.71	25.25	27.229
2019-01-16 15:00:00	1059.67	963.867	110.733	18.4867	833.22	21.5267	26.4713
2019-01-16 15:15:00	1023.8	970.867	107.533	18.7333	833.007	17.7867	25.7727
2019-01-16 15:30:00	989.733	981.333	103.867	18.94	832.94	14.9667	24.9407
2019-01-16 15:45:00	940.067	976.467	97.8	18.82	832.66	12.5133	23.6293
2019-01-16 16:00:00	882.933	954.8	89.8	18.6	832.5	12.0667	22.232
2019-01-16 16:15:00	819.467	916.733	80.2667	19.04	832.38	13.9333	20.748
2019-01-16 16:30:00	779.267	889.533	71.4667	18.9667	832.3	14.0867	19.122
2019-01-16 16:45:00	716.8	826.133	60.0667	19.2067	832.34	14.5667	17.2827
2019-01-16 17:00:00	667.267	724.867	66.8667	19.2733	832.26	15.3667	15.5187
2019-01-16 17:15:00	583.2	19.2667	254.267	19.3733	832.3	16.0933	13.0007
2019-01-16 17:30:00	490.467	31.7333	190.467	18.9933	832.3	18.2067	10.2747
2019-01-16 17:45:00	365	7.73333	131.733	18.8733	832.367	18.9133	7.424
2019-01-16 18:00:00	268.467	0	92.0667	19.0533	832.42	19.1133	5.326
2019-01-16 18:15:00	172.267	5.73333	54.2	18.4333	832.527	21.4133	3.20667
2019-01-16 18:30:00	114.4	2.6	32	17.72	832.6	22.88	1.972
2019-01-16 18:45:00	3.73333	0	0.2	16.2	832.673	24.96	0.0606667
2019-01-16 19:00:00	0	0	0	15.5667	832.72	26.3933	0
2019-01-16 19:15:00	0	0	0	14.9	832.76	27.8333	0
2019-01-16 19:30:00	0	0	0	14.54	832.9	28.8467	0
2019-01-16 19:45:00	0	0	0	14.7067	833.26	27.3933	0
2019-01-16 20:00:00	0	0	0	14.8067	833.44	26.5533	0
2019-01-16 20:15:00	0	0	0	14.78	833.547	26.46	0
2019-01-16 20:30:00	0	0	0	14.6267	833.7	26.86	0
2019-01-16 20:45:00	0	0	0	14.94	834.007	25.9	0
2019-01-16 21:00:00	0	0	0	14.8333	834.16	26	0
2019-01-16 21:15:00	0	0	0	14.36	834.48	27.0467	0
2019-01-16 21:30:00	0	0	0	14.1267	834.56	28.0333	0
2019-01-16 21:45:00	0	0	0	14.02	834.56	28.4733	0
2019-01-16 22:00:00	0	0	0	13.4267	834.88	29.8333	0
2019-01-16 22:15:00	0	0	0	12.96	834.92	30.86	0
2019-01-16 22:30:00	0	0	0	12.61	835.06	31.99	0
2019-01-16 22:45:00	0	0	0	12.4533	835.093	32.32	0
2019-01-16 23:00:00	0	0	0	12.0667	835.22	33.3733	0
2019-01-16 23:15:00	0	0	0	11.74	835.367	34.24	0
2019-01-16 23:30:00	0	0	0	11.4933	835.48	34.86	0
2019-01-16 23:45:00	0	0	0	11.9267	835.507	33.5667	0
2019-01-17	0	0	0	12.9071	835.5	31.0286	0
2019-01-17 00:15:00	0	0	0	12.88	835.5	30.4467	0
2019-01-17 00:30:00	0	0	0	12.5667	835.56	30.7267	0
2019-01-17 00:45:00	0	0	0	11.94	835.533	32.6667	0
2019-01-17 01:00:00	0	0	0	11.6733	835.54	33.8133	0
2019-01-17 01:15:00	0	0	0	11.3533	835.38	34.92	0
2019-01-17 01:30:00	0	0	0	11.1267	835.3	35.5067	0
2019-01-17 01:45:00	0	0	0	10.7067	835.393	36.7467	0
2019-01-17 02:00:00	0	0	0	10.1933	835.4	38.6667	0
2019-01-17 02:15:00	0	0	0	9.67333	835.493	40.18	0
2019-01-17 02:30:00	0	0	0	9.13333	835.5	42.3	0
2019-01-17 02:45:00	0	0	0	8.86	835.433	43.66	0
2019-01-17 03:00:00	0	0	0	9.10667	835.5	43.2133	0
2019-01-17 03:15:00	0	0	0	9.16667	835.353	43.0533	0
2019-01-17 03:30:00	0	0	0	8.74	835.2	44.5467	0
2019-01-17 03:45:00	0	0	0	9.08667	835.173	44.0267	0
2019-01-17 04:00:00	0	0	0	9.28667	835.1	43.54	0
2019-01-17 04:15:00	0	0	0	8.66667	835.287	45.4667	0
2019-01-17 04:30:00	0	0	0	7.98667	835.36	47.5467	0
2019-01-17 04:45:00	0	0	0	7.57333	835.28	48.96	0
2019-01-17 05:00:00	0	0	0	7.90667	835.14	48.2733	0
2019-01-17 05:15:00	0	0	0	8.52	834.953	45.9667	0
2019-01-17 05:30:00	0	0	0	8.11333	834.8	46.9467	0
2019-01-17 05:45:00	0	0	0	7.72667	834.8	48.34	0
2019-01-17 06:00:00	0	0	0	7.54667	834.86	49.92	0
2019-01-17 06:15:00	0	0	0	6.96	834.993	51.9133	0
2019-01-17 06:30:00	0	0	0	7.6	835.12	50.48	0
2019-01-17 06:45:00	0	0	0	7.50667	835.2	50.66	0
2019-01-17 07:00:00	0	0	0	6.84	835.32	53.6133	0
2019-01-17 07:15:00	0	0	0	6.36667	835.493	56	0
2019-01-17 07:30:00	0	0	0	6.52667	835.56	55.8	0
2019-01-17 07:45:00	0	0	0	7.24	835.627	52.2667	0
2019-01-17 08:00:00	0	0	0	6.63333	835.7	54.1933	0
2019-01-17 08:15:00	3.4	0.733333	0.666667	6.78	835.82	54.3133	0.0686667
2019-01-17 08:30:00	30.1333	4.73333	11	6.47333	835.96	55.7533	0.709333
2019-01-17 08:45:00	167.533	111.133	53.2667	7.1	836.187	55.2867	2.55
2019-01-17 09:00:00	266.933	5.46667	100.2	8.48	836.32	50.8867	4.62933
2019-01-17 09:15:00	369.533	0	155.667	8.60667	836.4	49.82	7.01933
2019-01-17 09:30:00	460.8	152.6	157.8	9.22	836.52	49.68	9.47867
2019-01-17 09:45:00	528.933	381.6	130.467	8.86	836.68	50.56	11.6567
2019-01-17 10:00:00	593.8	436.067	144.533	9.67333	836.9	50.34	13.9033
2019-01-17 10:15:00	640.333	755.867	56.5333	9.73333	837.047	47.8867	15.7807
2019-01-17 10:30:00	684.067	802.467	65.9333	9.84	837.26	47.8733	17.5507
2019-01-17 10:45:00	738.733	846.933	75.6	10.5533	837.327	46.52	19.2873
2019-01-17 11:00:00	803	875.067	83.8	12.0333	837.46	43.34	20.8613
2019-01-17 11:15:00	860.867	885	90	11.1	837.593	45.0467	22.0607
2019-01-17 11:30:00	916.467	898.333	96.1333	13.1333	837.54	41.56	23.3787
2019-01-17 11:45:00	954	902.4	101	12.88	837.247	41.2	24.3593
2019-01-17 12:00:00	984.667	900.867	104.733	11.98	837.36	45.24	25.254
2019-01-17 12:15:00	998.933	887.867	106.4	13.7467	837.16	41.9067	25.848
2019-01-17 12:30:00	1034.67	893	109.8	14.0067	836.88	40.7667	26.402
2019-01-17 12:45:00	1048.07	891.133	111.467	14.24	836.587	39.7	27.0233
2019-01-17 13:00:00	1057.33	892	113.2	14.5333	836.2	38.04	27.452
2019-01-17 13:15:00	1065.4	895.667	114.4	15.1733	835.733	36.4133	27.7893
2019-01-17 13:30:00	1091.07	964.667	123.267	15.36	835.38	35.86	28.0087
2019-01-17 13:45:00	1109.93	969.533	123.867	15.6733	834.847	34.7467	28.106
2019-01-17 14:00:00	1112.67	909.8	115.133	16.2733	834.42	33.02	27.9553
2019-01-17 14:15:00	1109.53	909.467	113.4	16.8133	833.967	30.74	27.476
2019-01-17 14:30:00	1093.93	914.467	111.933	17.0667	833.68	29.3933	27.042
2019-01-17 14:45:00	1064.4	922.4	109.8	17.0667	833.333	30.2533	26.568
2019-01-17 15:00:00	1025.47	928.133	107.2	17.4333	832.92	28.94	25.9013
2019-01-17 15:15:00	985.667	932.467	103.733	17.4667	832.653	29.12	24.9153
2019-01-17 15:30:00	945.133	936.067	99.6667	18.4133	832.38	26.8333	23.8733
2019-01-17 15:45:00	894.533	932.8	93.9333	18.3533	832.087	26.98	22.828
2019-01-17 16:00:00	850.6	923.867	87.4	19.0133	831.88	25.5533	21.6667
2019-01-17 16:15:00	796.933	894.333	78.8	19.4933	831.867	23.54	20.234
2019-01-17 16:30:00	760	873.467	70.6667	19.0933	831.8	23.5467	18.6567
2019-01-17 16:45:00	698.6	812.267	59.6667	19.4733	831.64	21.6867	16.8327
2019-01-17 17:00:00	652.067	715.533	83.4667	19.9267	831.76	21.2133	15.0987
2019-01-17 17:15:00	591.6	21.4	261.467	19.3667	831.613	21.4333	13.0087
2019-01-17 17:30:00	504.867	29.9333	197.8	19.1667	831.54	21.3067	10.68
2019-01-17 17:45:00	419.6	6.73333	149.733	19.2	831.5	22.0867	8.55267
2019-01-17 18:00:00	311.933	0	106	18.9467	831.44	22.9733	6.066
2019-01-17 18:15:00	204.733	12.7333	64.1333	18.5	831.467	24.2133	3.714
2019-01-17 18:30:00	97.4667	1	25.6667	17.7067	831.52	25.5933	1.55733
2019-01-17 18:45:00	7.46667	0	1.13333	16.92	831.56	26.8	0.0886667
2019-01-17 19:00:00	0	0	0	16.58	831.58	27.98	0
2019-01-17 19:15:00	0	0	0	16.6133	831.647	29	0
2019-01-17 19:30:00	0	0	0	16.44	831.8	29.6333	0
2019-01-17 19:45:00	0	0	0	16.1067	831.8	30.4	0
2019-01-17 20:00:00	0	0	0	15.74	831.86	30.8733	0
2019-01-17 20:15:00	0	0	0	15.4467	831.98	31.24	0
2019-01-17 20:30:00	0	0	0	15.0467	832.26	32.34	0
2019-01-17 20:45:00	0	0	0	15.3667	832.367	32.1067	0
2019-01-17 21:00:00	0	0	0	15.46	832.42	32.1733	0
2019-01-17 21:15:00	0	0	0	15.4333	832.593	33.7267	0
2019-01-17 21:30:00	0	0	0	15.48	832.66	36.62	0
2019-01-17 21:45:00	0	0	0	15.3	832.847	38.06	0
2019-01-17 22:00:00	0	0	0	15.3533	833.06	39.6267	0
2019-01-17 22:15:00	0	0	0	15.2333	833.1	40.6933	0
2019-01-17 22:30:00	0	0	0	15.2467	833.16	40.2933	0
2019-01-17 22:45:00	0	0	0	15.1467	833.32	39.86	0
2019-01-17 23:00:00	0	0	0	14.98	833.4	39.26	0
2019-01-17 23:15:00	0	0	0	14.8533	833.507	38.4733	0
2019-01-17 23:30:00	0	0	0	14.8267	833.42	38.5933	0
2019-01-17 23:45:00	0	0	0	14.58	833.433	39.5333	0
2019-01-18	0	0	0	14.6357	833.5	39.3929	0
2019-01-18 00:15:00	0	0	0	14.4533	833.567	39.36	0
2019-01-18 00:30:00	0	0	0	14.3667	833.5	39.2667	0
2019-01-18 00:45:00	0	0	0	14.2533	833.5	39.7067	0
2019-01-18 01:00:00	0	0	0	14.1	833.44	39.9133	0
2019-01-18 01:15:00	0	0	0	13.9667	833.373	40.42	0
2019-01-18 01:30:00	0	0	0	13.7333	833.24	41.2933	0
2019-01-18 01:45:00	0	0	0	13.4733	833.107	42.2867	0
2019-01-18 02:00:00	0	0	0	13.4467	833.04	42.5133	0
2019-01-18 02:15:00	0	0	0	13.3067	833.093	43.78	0
2019-01-18 02:30:00	0	0	0	13.18	832.98	44.5267	0
2019-01-18 02:45:00	0	0	0	12.8133	833.033	46.1467	0
2019-01-18 03:00:00	0	0	0	12.5333	832.96	47.4133	0
2019-01-18 03:15:00	0	0	0	12.5067	832.973	47.7867	0
2019-01-18 03:30:00	0	0	0	12.28	832.9	48.6667	0
2019-01-18 03:45:00	0	0	0	12.2333	832.78	49.22	0
2019-01-18 04:00:00	0	0	0	11.7733	832.7	50.5733	0
2019-01-18 04:15:00	0	0	0	11.7867	832.66	50.5667	0
2019-01-18 04:30:00	0	0	0	11.5867	832.74	51.4	0
2019-01-18 04:45:00	0	0	0	11.74	832.7	51.6267	0
2019-01-18 05:00:00	0	0	0	11.8333	832.7	51.4267	0
2019-01-18 05:15:00	0	0	0	11.7	832.767	51.48	0
2019-01-18 05:30:00	0	0	0	11.4467	832.76	52.0867	0
2019-01-18 05:45:00	0	0	0	11.4467	832.613	51.8333	0
2019-01-18 06:00:00	0	0	0	11.46	832.66	52.3467	0
2019-01-18 06:15:00	0	0	0	11.4	832.82	52.72	0
2019-01-18 06:30:00	0	0	0	11.2867	832.84	53.1733	0
2019-01-18 06:45:00	0	0	0	11.3267	833.133	52.96	0
2019-01-18 07:00:00	0	0	0	11.3333	833.3	52.76	0
2019-01-18 07:15:00	0	0	0	10.9667	833.393	54.1333	0
2019-01-18 07:30:00	0	0	0	11.1067	833.52	53.7533	0
2019-01-18 07:45:00	0	0	0	10.8667	833.68	54.82	0
2019-01-18 08:00:00	0	0	0	10.76	834.02	55.32	0
2019-01-18 08:15:00	2.86667	0.466667	0.533333	10.7	834.127	55.8667	0
2019-01-18 08:30:00	31.2	27	8.93333	10.7467	834.32	55.4533	0.612667
2019-01-18 08:45:00	196.333	132.267	58.4	10.92	834.613	55.64	2.774
2019-01-18 09:00:00	298.867	5.86667	108.933	11.34	834.82	54.2867	4.96333
2019-01-18 09:15:00	403.733	0	167.733	11.6733	834.927	53.5	7.486
2019-01-18 09:30:00	503.067	173.733	166	11.9267	835	52.6067	10.0767
2019-01-18 09:45:00	573.333	427.333	129.733	12.1667	835.093	52.16	12.3653
2019-01-18 10:00:00	630.467	641.667	82.6	12.8933	835.22	49.94	14.5327
2019-01-18 10:15:00	677.8	792.733	59.4667	13.7267	835.367	47.2067	16.496
2019-01-18 10:30:00	723	845.133	69.7333	13.6067	835.3	46.98	18.282
2019-01-18 10:45:00	771.933	885.267	79.2	14.6667	835.3	43.8	19.8807
2019-01-18 11:00:00	831.933	908.267	87.2667	15.0067	835.24	43.8267	21.3127
2019-01-18 11:15:00	883.8	917.2	92.6	14.37	835.2	46.53	22.402
2019-01-18 11:30:00	945.667	925.867	99.4	14.6667	835	45.6733	23.7573
2019-01-18 11:45:00	981	927.6	104.2	14.9333	834.853	45.6933	24.8153
2019-01-18 12:00:00	1008.6	924.333	107.733	15.4867	834.58	43.22	25.682
2019-01-18 12:15:00	1030.93	915.4	110.2	15.9	834.193	40.7933	26.342
2019-01-18 12:30:00	1056.07	909.133	112	16.4133	834.04	37.0267	26.8127
2019-01-18 12:45:00	1062.87	900.2	113	16.98	833.573	33.62	27.1267
2019-01-18 13:00:00	1054.2	888.133	112.933	17.2	833.28	32.8133	27.2
2019-01-18 13:15:00	1055.8	886.267	113.467	17.5067	832.747	32.2133	27.2287
2019-01-18 13:30:00	1072.27	941.6	120.733	17.92	832.32	31.3267	27.206
2019-01-18 13:45:00	1071.33	938	120.267	17.9867	831.893	31.0333	26.956
2019-01-18 14:00:00	1033.47	816.933	105.867	17.94	831.62	30.6133	26.574
2019-01-18 14:15:00	1020.8	833.8	107.6	18.86	831.047	28.6667	26.2773
2019-01-18 14:30:00	1069.13	894.133	109.733	18.64	830.62	28.62	26.6347
2019-01-18 14:45:00	1047.87	906.267	108.533	18.6867	830.327	28.48	26.198
2019-01-18 15:00:00	1006.2	908.867	105.467	18.9	829.98	27.4333	25.3667
2019-01-18 15:15:00	974.2	918.2	102.6	19.9667	829.593	25.34	24.6453
2019-01-18 15:30:00	925.4	914.8	97.5333	20.2867	829.38	24.7533	23.6033
2019-01-18 15:45:00	883.933	918.6	93.2	19.9	829.087	24.9467	22.6153
2019-01-18 16:00:00	835.8	906.533	86.2	20.36	828.82	24.1333	21.344
2019-01-18 16:15:00	802.867	902.133	79.8667	20.54	828.58	24.1933	20.2287
2019-01-18 16:30:00	760.467	870.133	70.8667	21.0733	828.5	22.9067	18.866
2019-01-18 16:45:00	714.933	831.467	61.3333	21.4	828.353	19.36	17.2787
2019-01-18 17:00:00	656.067	771.267	50.7333	21.2333	828.2	19.3	15.3353
2019-01-18 17:15:00	588.6	24.7333	262.733	21.18	828.387	21.3733	13.098
2019-01-18 17:30:00	501.467	33.5333	198.267	20.7	828.4	23.72	10.4727
2019-01-18 17:45:00	377.467	13.0667	137.333	20.3867	828.307	24.92	7.47667
2019-01-18 18:00:00	309.667	0	106.667	20.18	828.3	25.6467	5.99333
2019-01-18 18:15:00	214.8	14.7333	69.2667	19.68	828.42	26.6867	3.90267
2019-01-18 18:30:00	130.6	11.8	37.6	19.26	828.5	27.39	2.176
2019-01-18 18:45:00	19.2	0	3.6	18.74	828.41	28.19	0.23
2019-01-18 19:00:00	0	0	0	18.2933	828.54	27.68	0
2019-01-18 19:15:00	0	0	0	18.0733	828.687	28.7533	0
2019-01-18 19:30:00	0	0	0	18.0133	828.76	28.9	0
2019-01-18 19:45:00	0	0	0	17.78	828.987	28.8733	0
2019-01-18 20:00:00	0	0	0	17.6133	829.18	28.98	0
2019-01-18 20:15:00	0	0	0	17.3533	829.233	29.34	0
2019-01-18 20:30:00	0	0	0	17.2067	829.42	29.62	0
2019-01-18 20:45:00	0	0	0	17.0733	829.527	29.96	0
2019-01-18 21:00:00	0	0	0	16.94	829.84	30.26	0
2019-01-18 21:15:00	0	0	0	16.8067	830.093	30.4933	0
2019-01-18 21:30:00	0	0	0	16.6933	830.16	30.6867	0
2019-01-18 21:45:00	0	0	0	16.5333	830.413	31.26	0
2019-01-18 22:00:00	0	0	0	16.4067	830.5	31.72	0
2019-01-18 22:15:00	0	0	0	16.2533	830.687	32.2067	0
2019-01-18 22:30:00	0	0	0	16.08	830.74	32.79	0
2019-01-18 22:45:00	0	0	0	15.9667	830.92	33.5067	0
2019-01-18 23:00:00	0	0	0	15.8867	831.12	34.0733	0
2019-01-18 23:15:00	0	0	0	15.84	831.133	34.4267	0
2019-01-18 23:30:00	0	0	0	15.7	831.32	35.0267	0
2019-01-18 23:45:00	0	0	0	15.6067	831.427	35.5533	0
2019-01-19	0	0	0	15.61	831.58	35.75	0
2019-01-19 00:15:00	0	0	0	15.5933	831.913	35.9	0
2019-01-19 00:30:00	0	0	0	15.5333	832	36.2733	0
2019-01-19 00:45:00	0	0	0	15.42	831.907	37.0533	0
2019-01-19 01:00:00	0	0	0	15.3467	831.96	37.7333	0
2019-01-19 01:15:00	0	0	0	15.22	832	38.2933	0
2019-01-19 01:30:00	0	0	0	15.2	832.06	38.5733	0
2019-01-19 01:45:00	0	0	0	15.0667	831.98	39.0867	0
2019-01-19 02:00:00	0	0	0	14.9067	831.9	39.8867	0
2019-01-19 02:15:00	0	0	0	14.7	831.967	40.9333	0
2019-01-19 02:30:00	0	0	0	14.46	831.96	41.6267	0
2019-01-19 02:45:00	0	0	0	14.2867	832.027	42.0867	0
2019-01-19 03:00:00	0	0	0	14.24	831.98	42	0
2019-01-19 03:15:00	0	0	0	14.2067	831.993	41.8933	0
2019-01-19 03:30:00	0	0	0	14.1267	832	42.0467	0
2019-01-19 03:45:00	0	0	0	13.92	832.027	42.58	0
2019-01-19 04:00:00	0	0	0	13.6133	832.04	43.2	0
2019-01-19 04:15:00	0	0	0	13.6533	832.027	42.74	0
2019-01-19 04:30:00	0	0	0	13.42	832.04	43.1067	0
2019-01-19 04:45:00	0	0	0	13.3	832.027	43.3133	0
2019-01-19 05:00:00	0	0	0	13.1267	832.04	43.6867	0
2019-01-19 05:15:00	0	0	0	13.04	831.973	43.6333	0
2019-01-19 05:30:00	0	0	0	13.0067	831.96	43.0867	0
2019-01-19 05:45:00	0	0	0	12.98	831.907	42.3733	0
2019-01-19 06:00:00	0	0	0	12.9333	831.96	42.2133	0
2019-01-19 06:15:00	0	0	0	12.8467	832.093	42.44	0
2019-01-19 06:30:00	0	0	0	12.9	832.1	42.2733	0
2019-01-19 06:45:00	0	0	0	12.9067	832.153	42.2933	0
2019-01-19 07:00:00	0	0	0	12.9867	832.36	42.02	0
2019-01-19 07:15:00	0	0	0	12.9467	832.493	42.46	0
2019-01-19 07:30:00	0	0	0	12.7267	832.56	43.76	0
2019-01-19 07:45:00	0	0	0	12.5733	832.693	44.9267	0
2019-01-19 08:00:00	0	0	0	12.04	832.82	47.18	0
2019-01-19 08:15:00	2.13333	0.266667	0.133333	10.9133	832.953	52.3333	0
2019-01-19 08:30:00	29.3333	35.2	7.06667	11.06	833.16	53.0533	0.572
2019-01-19 08:45:00	195.667	139.8	57	11.84	833.293	51.84	2.76933
2019-01-19 09:00:00	301.333	2.73333	110.867	12.9467	833.36	48.5467	5.032
2019-01-19 09:15:00	409.133	0	171.067	13.6067	833.4	46.0067	7.582
2019-01-19 09:30:00	506	181.067	165.6	13.9	833.46	45.2867	10.1507
2019-01-19 09:45:00	580.533	429.533	133	14.26	833.46	45.0667	12.512
2019-01-19 10:00:00	641.867	749.667	50.4	14.3733	833.54	45.5267	14.7233
2019-01-19 10:15:00	691.467	812.733	61.1333	14.4933	833.553	45.42	16.7493
2019-01-19 10:30:00	737.267	865.467	71.6667	14.64	833.64	45.2933	18.5667
2019-01-19 10:45:00	783.667	901.133	80.8667	15.1	833.813	44.3067	20.1633
2019-01-19 11:00:00	843.267	921.733	88.8667	15.4067	833.96	43.6467	21.6433
2019-01-19 11:15:00	906.4	932.667	95.4667	15.92	833.907	42.7733	22.8953
2019-01-19 11:30:00	958.6	938.133	101.2	16.3	833.78	40.9867	24.006
2019-01-19 11:45:00	995.133	941.067	106.067	17.1533	833.62	34.7733	25.092
2019-01-19 12:00:00	1023.4	936.867	109.533	17.32	833.4	31.54	25.8387
2019-01-19 12:15:00	1038.87	920.4	111	17.3133	833.28	32.2	26.2873
2019-01-19 12:30:00	1058.6	909.467	112.4	17.6067	833.08	31.0867	26.7167
2019-01-19 12:45:00	1067.73	903.933	113.8	17.48	832.733	31.3667	26.8927
2019-01-19 13:00:00	1054.4	887.667	113.133	18.6733	832.38	28.88	27.1247
2019-01-19 13:15:00	1065.47	895.2	115.067	18.5	832.033	28.7333	27.5187
2019-01-19 13:30:00	1086.13	949.267	122.333	19.06	831.62	27.2467	27.324
2019-01-19 13:45:00	1092.4	956.933	123.333	19.44	831.167	26.72	27.3673
2019-01-19 14:00:00	1099.4	894.8	114.133	18.8333	830.82	26.36	27.3793
2019-01-19 14:15:00	1095.73	893.133	112.267	19.3467	830.433	24.7067	27.0247
2019-01-19 14:30:00	1094.93	910.933	112.333	19.6533	830.02	23.5533	26.8567
2019-01-19 14:45:00	1078.67	929.533	111.733	20.1067	829.687	22.4933	26.4893
2019-01-19 15:00:00	1034.87	935.533	109.067	20.1933	829.42	21.5	26.1387
2019-01-19 15:15:00	1009.6	955.067	107.133	20.5667	829.207	23	25.498
2019-01-19 15:30:00	960.267	948.533	101.933	20.8	829.08	21.0333	24.3293
2019-01-19 15:45:00	908.467	944.333	96.2	20.86	828.693	19.7467	23.0373
2019-01-19 16:00:00	852	923.8	88.6	21.0067	828.6	17.7733	21.612
2019-01-19 16:15:00	802.267	904.467	80.5333	21.4867	828.573	17.2867	20.3113
2019-01-19 16:30:00	758.933	873.067	71.4667	21.4467	828.5	15.2933	18.898
2019-01-19 16:45:00	719.8	838.6	63.5	21.1	828.32	16.02	17.502
2019-01-19 17:00:00	669.933	787.4	52.2667	21.6733	828.28	13.1333	15.6873
2019-01-19 17:15:00	621.333	122.4	244.933	21.5467	828.267	12.0067	13.832
2019-01-19 17:30:00	544.133	35.0667	215.8	21.0533	828.32	12.62	11.4727
2019-01-19 17:45:00	452.333	13.9333	163.2	21.0067	828.373	12.3133	9.124
2019-01-19 18:00:00	348.267	0	119.867	20.5133	828.24	12.6533	6.746
2019-01-19 18:15:00	242.067	6.53333	77	20.18	828.187	13.0667	4.44933
2019-01-19 18:30:00	132.4	8.33333	35.7333	19.22	828.52	14.04	2.186
2019-01-19 18:45:00	19.4	0	3.73333	18.38	828.587	14.7867	0.245333
2019-01-19 19:00:00	0	0	0	17.8	828.86	15.1667	0
2019-01-19 19:15:00	0	0	0	17.4267	828.993	15.6933	0
2019-01-19 19:30:00	0	0	0	17.5067	829.12	15.4133	0
2019-01-19 19:45:00	0	0	0	17.2667	829.2	15.8	0
2019-01-19 20:00:00	0	0	0	16.8	829.32	16.6067	0
2019-01-19 20:15:00	0	0	0	16.8933	829.587	18.9733	0
2019-01-19 20:30:00	0	0	0	16.86	829.66	21.2267	0
2019-01-19 20:45:00	0	0	0	16.9867	829.913	21.48	0
2019-01-19 21:00:00	0	0	0	16.6467	830.12	22.46	0
2019-01-19 21:15:00	0	0	0	16.5667	830.387	22.8467	0
2019-01-19 21:30:00	0	0	0	16.5133	830.58	22.9933	0
2019-01-19 21:45:00	0	0	0	16.4467	830.793	23.5067	0
2019-01-19 22:00:00	0	0	0	16.2667	830.92	23.9333	0
2019-01-19 22:15:00	0	0	0	16.18	831.24	24.32	0
2019-01-19 22:30:00	0	0	0	16.0733	831.46	24.68	0
2019-01-19 22:45:00	0	0	0	15.8533	831.593	25.3333	0
2019-01-19 23:00:00	0	0	0	15.6733	831.72	25.6467	0
2019-01-19 23:15:00	0	0	0	15.55	831.89	25.79	0
2019-01-19 23:30:00	0	0	0	15.56	831.92	25.56	0
2019-01-19 23:45:00	0	0	0	15.4467	832.193	25.5067	0
2019-01-20	0	0	0	15.2667	832.2	25.8667	0
2019-01-20 00:15:00	0	0	0	15.1	832.413	26.12	0
2019-01-20 00:30:00	0	0	0	15.0667	832.56	26.3067	0
2019-01-20 00:45:00	0	0	0	14.68	832.6	27.3333	0
2019-01-20 01:00:00	0	0	0	14.0133	832.66	28.9533	0
2019-01-20 01:15:00	0	0	0	13.98	832.74	29.0067	0
2019-01-20 01:30:00	0	0	0	14.24	832.66	28.54	0
2019-01-20 01:45:00	0	0	0	13.96	832.7	29.2133	0
2019-01-20 02:00:00	0	0	0	13.9867	832.82	29.4133	0
2019-01-20 02:15:00	0	0	0	14.18	832.873	28.98	0
2019-01-20 02:30:00	0	0	0	13.82	832.8	30.1	0
2019-01-20 02:45:00	0	0	0	13.7667	832.827	30.96	0
2019-01-20 03:00:00	0	0	0	13.4067	832.84	32.1067	0
2019-01-20 03:15:00	0	0	0	13.1133	832.947	33.1933	0
2019-01-20 03:30:00	0	0	0	13.1867	833.04	33.54	0
2019-01-20 03:45:00	0	0	0	13.0267	833	34.16	0
2019-01-20 04:00:00	0	0	0	12.78	833	34.9333	0
2019-01-20 04:15:00	0	0	0	12.8133	833.067	35.1067	0
2019-01-20 04:30:00	0	0	0	12.5933	833.06	35.8533	0
2019-01-20 04:45:00	0	0	0	12.5733	832.94	35.9667	0
2019-01-20 05:00:00	0	0	0	12.34	833	36.8867	0
2019-01-20 05:15:00	0	0	0	12.2933	833.04	37.5267	0
2019-01-20 05:30:00	0	0	0	11.66	833.02	39.3667	0
2019-01-20 05:45:00	0	0	0	11.4667	833.033	40.2867	0
2019-01-20 06:00:00	0	0	0	11.62	833.1	40.06	0
2019-01-20 06:15:00	0	0	0	11.7467	833.193	39.76	0
2019-01-20 06:30:00	0	0	0	11.4467	833.26	40.6467	0
2019-01-20 06:45:00	0	0	0	10.66	833.42	42.9	0
2019-01-20 07:00:00	0	0	0	11.0667	833.56	41.5667	0
2019-01-20 07:15:00	0	0	0	10.7867	833.533	41.5267	0
2019-01-20 07:30:00	0	0	0	10.5	833.66	42.32	0
2019-01-20 07:45:00	0	0	0	10.5467	833.913	42.5133	0
2019-01-20 08:00:00	0	0	0	10.66	834	41.9867	0
2019-01-20 08:15:00	2.73333	0.466667	0.266667	10.7467	834.307	41.6	0
2019-01-20 08:30:00	30.3333	35.2	7.33333	10.5733	834.46	41.9733	0.604667
2019-01-20 08:45:00	197.133	168.2	55.5333	11.0667	834.687	41.1067	2.792
2019-01-20 09:00:00	301.933	2.73333	113.133	11.9867	834.76	38.6933	5.03733
2019-01-20 09:15:00	412.133	0	174.533	12.7533	834.76	37.3667	7.636
2019-01-20 09:30:00	506.467	182.8	165.667	13.54	834.96	34.18	10.154
2019-01-20 09:45:00	573.133	416.467	134.333	14.4267	835.147	32.2067	12.3673
2019-01-20 10:00:00	637.2	698.733	67.2667	14.1867	835.3	30.9867	14.6127
2019-01-20 10:15:00	684.533	804.6	60.6667	14.42	835.393	31.2267	16.5593
2019-01-20 10:30:00	728.333	854.933	70.9333	13.56	835.46	34.6733	18.288
2019-01-20 10:45:00	777.2	893.4	80.4667	13.92	835.5	33.4333	19.8553
2019-01-20 11:00:00	831.6	907.267	87.8	14.0933	835.44	35.1067	21.308
2019-01-20 11:15:00	890.933	915.6	94.0667	14.3133	835.267	33.8067	22.5213
2019-01-20 11:30:00	939.733	920	99.6	14.4867	835.34	33.9267	23.7087
2019-01-20 11:45:00	980.267	926.267	104.667	15	835.113	30.7333	25.0067
2019-01-20 12:00:00	1015.8	928.667	109.133	15.48	835.04	28.6867	26.14
2019-01-20 12:15:00	1043.53	924.2	111.8	15.7867	834.787	28.0533	26.8973
2019-01-20 12:30:00	1075	922.4	114.533	16.18	834.64	26.0667	27.594
2019-01-20 12:45:00	1092.27	921.4	116.6	16.78	834.453	23.92	28.1993
2019-01-20 13:00:00	1094.87	918.467	117.8	17.0733	834.18	23.2133	28.5153
2019-01-20 13:15:00	1104.93	923.2	119.2	17.32	833.793	21.84	28.8
2019-01-20 13:30:00	1129.4	987.8	127.533	17.5067	833.58	20.86	28.952
2019-01-20 13:45:00	1143.87	1000.4	129.2	17.5733	833.26	20.2667	28.966
2019-01-20 14:00:00	1141.2	925.133	118.4	17.9467	832.98	20.08	28.642
2019-01-20 14:15:00	1145.4	929	117.067	17.86	832.593	21.8733	28.3007
2019-01-20 14:30:00	1130.8	935.067	115.8	18.4467	832.32	20.8467	27.9253
2019-01-20 14:45:00	1081.93	927.2	112	18.9733	831.96	20.84	27.1007
2019-01-20 15:00:00	1036.67	930.6	109	18.7867	831.62	20.5267	26.394
2019-01-20 15:15:00	989.133	927	104.533	19.1733	831.447	19.72	25.2673
2019-01-20 15:30:00	940	924	99.7333	19.08	831.12	20.1867	23.9747
2019-01-20 15:45:00	890	920.733	94.3333	19.3733	830.907	20.0867	22.8147
2019-01-20 16:00:00	833.533	900.067	86.7333	19.22	830.78	20.2733	21.458
2019-01-20 16:15:00	776.8	872	78.2667	19.6733	830.58	19.94	19.842
2019-01-20 16:30:00	728.533	841.8	69.6667	19.2333	830.44	20.9933	18.254
2019-01-20 16:45:00	678.333	800.2	59.8	19.3533	830.307	21.3333	16.5007
2019-01-20 17:00:00	634.667	728.467	68.6667	19.5467	830.24	21.1333	15.034
2019-01-20 17:15:00	567	31.4	269	19.01	830.2	21.61	12.8
2019-01-20 17:30:00	446	57.5333	192.267	19.0067	830.16	21.8067	9.23333
2019-01-20 17:45:00	321.133	42.4667	131.867	18.7533	830.333	21.9267	7.69933
2019-01-20 18:00:00	314.4	0	119.133	18.7867	830.2	21.6867	6.24533
2019-01-20 18:15:00	210.067	18.7333	76.4	18.48	830.293	22.1067	3.904
2019-01-20 18:30:00	97.4	15.7333	32.1333	18.52	830.36	21.8933	1.64667
2019-01-20 18:45:00	12.3333	0	2.46667	17.7667	830.413	22.9133	0.159333
2019-01-20 19:00:00	0	0	0	17.48	830.7	23.38	0
2019-01-20 19:15:00	0	0	0	17.1267	830.82	24.2067	0
2019-01-20 19:30:00	0	0	0	17.0867	830.9	24.8333	0
2019-01-20 19:45:00	0	0	0	17.0467	831.02	25.02	0
2019-01-20 20:00:00	0	0	0	16.7733	831.22	25.7067	0
2019-01-20 20:15:00	0	0	0	16.7533	831.393	25.7333	0
2019-01-20 20:30:00	0	0	0	16.32	831.46	26.6667	0
2019-01-20 20:45:00	0	0	0	16.2067	831.687	26.7533	0
2019-01-20 21:00:00	0	0	0	16.38	831.78	26.23	0
2019-01-20 21:15:00	0	0	0	16.3667	832.047	25.5667	0
2019-01-20 21:30:00	0	0	0	16.08	832.14	26.0933	0
2019-01-20 21:45:00	0	0	0	16.06	832.22	26.2267	0
2019-01-20 22:00:00	0	0	0	16.0933	832.3	26.0867	0
2019-01-20 22:15:00	0	0	0	15.7933	832.513	27.1333	0
2019-01-20 22:30:00	0	0	0	15.7067	832.66	27.28	0
2019-01-20 22:45:00	0	0	0	15.7067	832.887	27.34	0
2019-01-20 23:00:00	0	0	0	15.4267	832.96	28.2067	0
2019-01-20 23:15:00	0	0	0	15.3467	833.187	28.8067	0
2019-01-20 23:30:00	0	0	0	14.9867	833.32	29.7667	0
2019-01-20 23:45:00	0	0	0	14.76	833.52	30.2333	0
2019-01-21	0	0	0	14.72	833.6	30.75	0
2019-01-21 00:15:00	0	0	0	14.66	833.813	31.2067	0
2019-01-21 00:30:00	0	0	0	14.3933	833.9	32.22	0
2019-01-21 00:45:00	0	0	0	14.3267	834.02	33.3133	0
2019-01-21 01:00:00	0	0	0	14.32	834.16	34.2	0
2019-01-21 01:15:00	0	0	0	14.0933	834.133	34.9667	0
2019-01-21 01:30:00	0	0	0	13.7733	834.26	36.4667	0
2019-01-21 01:45:00	0	0	0	13.5267	834.18	37.9533	0
2019-01-21 02:00:00	0	0	0	13.2133	834.16	39.4267	0
2019-01-21 02:15:00	0	0	0	12.9867	834.173	40.3933	0
2019-01-21 02:30:00	0	0	0	12.9467	834.1	40.6933	0
2019-01-21 02:45:00	0	0	0	13.02	834.193	40.4333	0
2019-01-21 03:00:00	0	0	0	12.86	834.2	40.9533	0
2019-01-21 03:15:00	0	0	0	12.6533	834.2	42.2133	0
2019-01-21 03:30:00	0	0	0	12.4467	834.2	44.3267	0
2019-01-21 03:45:00	0	0	0	12.1867	834.293	45.3133	0
2019-01-21 04:00:00	0	0	0	11.7467	834.3	46.48	0
2019-01-21 04:15:00	0	0	0	11.68	834.42	46.4733	0
2019-01-21 04:30:00	0	0	0	11.4267	834.5	47.02	0
2019-01-21 04:45:00	0	0	0	11.06	834.553	48.0733	0
2019-01-21 05:00:00	0	0	0	10.81	834.66	48.55	0
2019-01-21 05:15:00	0	0	0	10.48	834.667	49.48	0
2019-01-21 05:30:00	0	0	0	10.2733	834.66	50.02	0
2019-01-21 05:45:00	0	0	0	10.1667	834.727	50.2333	0
2019-01-21 06:00:00	0	0	0	9.97333	834.8	50.7467	0
2019-01-21 06:15:00	0	0	0	9.8	834.893	51.2867	0
2019-01-21 06:30:00	0	0	0	9.66667	834.9	51.7267	0
2019-01-21 06:45:00	0	0	0	9.58	835.047	52.0067	0
2019-01-21 07:00:00	0	0	0	9.5	835.32	52.54	0
2019-01-21 07:15:00	0	0	0	9.48	835.64	52.7667	0
2019-01-21 07:30:00	0	0	0	9.32667	835.74	53.1	0
2019-01-21 07:45:00	0	0	0	9.23333	835.86	53.44	0
2019-01-21 08:00:00	0	0	0	9.05333	835.8	53.9733	0
2019-01-21 08:15:00	3.73333	0.666667	0.933333	8.99333	835.893	54.6267	0.018
2019-01-21 08:30:00	28	5.33333	10.9333	9.02667	836.08	54.3267	0.635333
2019-01-21 08:45:00	138.267	92.5333	45.8	9.06667	836.24	54.4333	2.21
2019-01-21 09:00:00	229.533	10.1333	94.4667	9.42	836.22	53.5267	4.084
2019-01-21 09:15:00	317.467	0	142.867	9.82667	836.607	52.4333	6.14667
2019-01-21 09:30:00	397.733	150.4	144.533	10.4667	836.88	50.6067	8.26667
2019-01-21 09:45:00	466	309	137.867	11.1333	837.093	48.8667	10.402
2019-01-21 10:00:00	531.667	162.2	231.133	11.3	837.16	47.26	12.5353
2019-01-21 10:15:00	585.667	707.333	53.4	11.6067	837.253	46.3333	14.5287
2019-01-21 10:30:00	641.933	762.6	63.6	10.8733	837.46	48.1533	16.3893
2019-01-21 10:45:00	699.533	807.4	72.8	11.4133	837.527	45.8267	18.2087
2019-01-21 11:00:00	763.533	833.8	80.8667	12.0533	837.54	44.3333	19.8893
2019-01-21 11:15:00	829.667	851.067	87.7333	11.9667	837.5	45.34	21.3313
2019-01-21 11:30:00	888	866.333	94.1333	12.3267	837.44	44.9333	22.6507
2019-01-21 11:45:00	929.267	874.8	99.5333	12.86	837.373	44.54	23.74
2019-01-21 12:00:00	961.267	875.8	103.133	13.2533	837.24	44.1467	24.7413
2019-01-21 12:15:00	998.333	879.933	106.933	13.64	836.987	43.9	25.66
2019-01-21 12:30:00	1024.93	874.4	108.933	13.96	836.78	43.4733	26.2713
2019-01-21 12:45:00	1039.6	872.6	110.6	14.2467	836.433	43.3	26.764
2019-01-21 13:00:00	1051.27	876.533	112.733	14.7533	836.14	42.2667	27.18
2019-01-21 13:15:00	1051.27	873.733	113.067	15.3333	835.833	41.4067	27.374
2019-01-21 13:30:00	1065.33	924.333	120.133	16.08	835.42	39.86	27.466
2019-01-21 13:45:00	1077.2	935.533	121.2	16.2733	834.94	39.84	27.398
2019-01-21 14:00:00	1084.33	875.6	112.667	16.9067	834.58	38.5867	27.2507
2019-01-21 14:15:00	1048.53	837.6	110.4	17.22	834.167	37.5067	26.9327
2019-01-21 14:30:00	968.867	782.933	113.067	17.4133	833.82	36.8867	24.6733
2019-01-21 14:45:00	856.067	714.4	120.867	17.46	833.553	37.16	24.2987
2019-01-21 15:00:00	1062.53	954.867	112.333	18.1133	833.22	35.4267	26.5533
2019-01-21 15:15:00	1051.2	985.4	112.6	18.49	833.01	34.66	25.961
2019-01-21 15:30:00	984.6	981.267	106.6	18.54	832.84	33.9133	23.226
2019-01-21 15:45:00	905.867	935.4	95.8667	19.04	832.56	33.1933	21.9333
2019-01-21 16:00:00	808.867	850.6	96.4667	18.4467	832.34	34.3467	21.0973
2019-01-21 16:15:00	777.867	871.133	78.7333	19.3067	832.313	32.9133	19.7713
2019-01-21 16:30:00	724.067	835.4	69.5333	18.82	832.04	33.86	17.9773
2019-01-21 16:45:00	661.867	781.2	59.4	19.0267	831.947	33.6867	16.012
2019-01-21 17:00:00	514.933	257.533	170.733	19.1333	831.86	32.8267	12.9193
2019-01-21 17:15:00	523.8	29.3333	245.133	18.76	831.713	33.8467	11.43
2019-01-21 17:30:00	452.6	35.6667	189.333	19.0067	831.64	33.14	9.83467
2019-01-21 17:45:00	372.933	22.7333	142.067	19.0933	831.6	33.0533	7.73933
2019-01-21 18:00:00	282.667	0	103.133	18.6733	831.6	33.7933	5.582
2019-01-21 18:15:00	185	7.86667	63.8	18.3067	831.507	34.5933	3.414
2019-01-21 18:30:00	92.2	2.2	28.4667	17.64	831.5	35.6467	1.486
2019-01-21 18:45:00	15.2667	0	3.33333	17.1667	831.527	36.0867	0.162
2019-01-21 19:00:00	0	0	0	16.76	831.72	36.8133	0
2019-01-21 19:15:00	0	0	0	16.51	831.8	38.06	0
2019-01-21 19:30:00	0	0	0	15.7667	831.92	40.0867	0
[truncated: 68,177 more rows]
