# Supplementary material
Source: PeerJ journal article supplement (doi:10.7717/peerj-cs.3610)
Supplement: Solar_station_site_7_Nominal_capacity30MW.xlsx [file Solar_station_site_7_Nominal_capacity30MW.xlsx]

## Sheet: Sheet1
Time(year-month-day h:m:s)	Total solar irradiance (W/m2)	Direct normal irradiance (W/m2)	Global horizontal irradiance (W/m2)	Air temperature (°C)	Atmosphere (hpa)	Relative humidity (%)	Power (MW)
2019-01-01	0	0	0	4.6	862.5	40.97	0
2019-01-01 00:15:00	0	0	0	4.6	862.516	40.7667	0
2019-01-01 00:30:00	0	0	0	4.6	862.476	40.9467	0
2019-01-01 00:45:00	0	0	0	4.6	862.422	43.4133	0
2019-01-01 01:00:00	0	0	0	1.94667	862.389	51.3867	0
2019-01-01 01:15:00	0	0	0	2.4	862.351	49.7133	0
2019-01-01 01:30:00	0	0	0	2.4	862.277	49.0133	0
2019-01-01 01:45:00	0	0	0	3.35333	862.245	47.2133	0
2019-01-01 02:00:00	0	0	0	3.5	862.313	49.1	0
2019-01-01 02:15:00	0	0	0	3.5	862.375	49.6467	0
2019-01-01 02:30:00	0	0	0	3.5	862.445	48.9667	0
2019-01-01 02:45:00	0	0	0	2.47333	862.444	50.8333	0
2019-01-01 03:00:00	0	0	0	1.6	862.516	54.5733	0
2019-01-01 03:15:00	0	0	0	2	862.476	52.4667	0
2019-01-01 03:30:00	0	0	0	2.4	862.335	53.4267	0
2019-01-01 03:45:00	0	0	0	2.4	862.268	53.18	0
2019-01-01 04:00:00	0	0	0	2.4	862.19	53.4933	0
2019-01-01 04:15:00	0	0	0	2.4	862.083	54.4867	0
2019-01-01 04:30:00	0	0	0	2.4	861.976	54.5133	0
2019-01-01 04:45:00	0	0	0	1.6	861.921	55.7333	0
2019-01-01 05:00:00	0	0	0	1.4	861.853	56.1933	0
2019-01-01 05:15:00	0	0	0	1.4	861.762	56.3	0
2019-01-01 05:30:00	0	0	0	1.4	861.785	57.3733	0
2019-01-01 05:45:00	0	0	0	0.813333	861.809	60.1733	0
2019-01-01 06:00:00	0	0	0	0.3	861.891	62.5	0
2019-01-01 06:15:00	0	0	0	0.3	862.054	65.4867	0
2019-01-01 06:30:00	0	0	0	0.3	862.099	64.7533	0
2019-01-01 06:45:00	0	0	0	0.3	862.277	64.3	0
2019-01-01 07:00:00	0	0	0	0.3	862.389	66.1867	0
2019-01-01 07:15:00	0	0	0	0.006667	862.492	66.1933	0
2019-01-01 07:30:00	0	0	0	-0.8	862.798	68.6533	0
2019-01-01 07:45:00	0	0	0	-1.2	863.078	70.28	0
2019-01-01 08:00:00	0	0	0	-1.8	863.312	71.44	0
2019-01-01 08:15:00	1.2	0.933333	1.29933	-1.8	863.568	71.0933	0
2019-01-01 08:30:00	9.73333	7.06667	8.28267	-1.8	863.771	71.5467	0.170667
2019-01-01 08:45:00	81.8667	21.4667	66.692	-1.33333	863.975	70.1733	2.12
2019-01-01 09:00:00	83.8	68.2	67.8293	0.2	864.081	64.54	4.65533
2019-01-01 09:15:00	192.4	134.4	156.228	1	863.787	62.4133	7.186
2019-01-01 09:30:00	306.867	171.133	249.231	2.15333	863.576	59.32	9.88333
2019-01-01 09:45:00	506.8	197.867	411.901	1.2	863.46	60.94	12.2893
2019-01-01 10:00:00	585.867	245.667	476.264	1.42	863.499	59.46	14.256
2019-01-01 10:15:00	635.333	282.4	516.161	2.3	863.576	57.5133	15.846
2019-01-01 10:30:00	683.8	319.4	555.299	2.44667	863.657	56.7467	17.2233
2019-01-01 10:45:00	728.333	355.267	591.732	3.4	863.665	53.4133	18.484
2019-01-01 11:00:00	771.733	384.6	626.973	4.5	863.643	52.5133	19.6933
2019-01-01 11:15:00	814.933	400.333	661.78	4.5	863.522	51.34	20.728
2019-01-01 11:30:00	852.8	394.533	692.635	5.16	863.288	48.5467	21.5447
2019-01-01 11:45:00	896.6	376.933	727.985	6.04	862.953	46.2333	22.3227
2019-01-01 12:00:00	936.6	343	760.845	7.21333	862.638	43.3867	23.0753
2019-01-01 12:15:00	973.933	297.667	790.726	7.8	862.221	41.8	23.678
2019-01-01 12:30:00	997.267	246.667	810.105	7.8	861.793	40.8733	24.1707
2019-01-01 12:45:00	1015.2	197.2	824.396	7.8	861.303	39.5733	24.604
2019-01-01 13:00:00	1021.8	155.067	829.431	7.8	860.902	37.9067	24.6993
2019-01-01 13:15:00	1024.27	127.667	831.597	7.8	860.422	35.9267	24.8747
2019-01-01 13:30:00	1022.13	109.067	829.973	8.31333	860.091	34.26	24.8727
2019-01-01 13:45:00	1008.07	95	818.387	8.9	859.686	33.48	24.5647
2019-01-01 14:00:00	991.733	84.8667	805.179	8.97333	859.279	32.6267	24.314
2019-01-01 14:15:00	959.867	77.8667	779.249	10	858.968	31.0133	23.938
2019-01-01 14:30:00	845.4	72.1333	686.303	10	858.627	31.0133	22.7493
2019-01-01 14:45:00	873.733	74.2667	709.472	10	858.423	30.6533	22.782
2019-01-01 15:00:00	864.933	77.0667	702.217	10.2933	858.251	29.3067	22.674
2019-01-01 15:15:00	842.867	95.6	684.624	11.1	857.987	31.5333	21.7073
2019-01-01 15:30:00	619.333	124.733	503.007	11.1	857.817	35.16	15.2093
2019-01-01 15:45:00	611.2	119.8	496.349	11.1	857.68	34.24	14.98
2019-01-01 16:00:00	548.333	118.4	445.247	11.1	857.448	33.5133	15.1113
2019-01-01 16:15:00	576.867	100.133	468.145	11.1	857.488	24.8133	14.938
2019-01-01 16:30:00	505.6	113.667	410.547	11.1	857.571	22.8667	14.0933
2019-01-01 16:45:00	540.6	72.6	438.913	11.1	857.672	23.42	14.66
2019-01-01 17:00:00	533.467	79.7333	433.012	11.1	857.771	23.4	14.0733
2019-01-01 17:15:00	447.6	49.3333	363.288	11.1	858.038	23.36	11.5473
2019-01-01 17:30:00	370.333	40.4	300.277	11.1	858.167	27.74	9.436
2019-01-01 17:45:00	287.333	36.4	232.72	11.1	858.493	30	6.83067
2019-01-01 18:00:00	204.133	23.9333	165.431	10.44	858.597	41.0667	4.382
2019-01-01 18:15:00	108.533	13.2667	87.804	9.04667	858.711	43.6933	1.972
2019-01-01 18:30:00	18.2	2.93333	14.3993	8.16667	858.999	46.5133	0.250667
2019-01-01 18:45:00	1	0	0	7.9	859.197	47.8867	0
2019-01-01 19:00:00	1	0	0	7.53333	859.417	48.76	0
2019-01-01 19:15:00	1	0	0	6.8	859.684	49.64	0
2019-01-01 19:30:00	1	0	0	6.8	859.866	47.3667	0
2019-01-01 19:45:00	1	0	0	6.8	860.022	47.78	0
2019-01-01 20:00:00	1	0	0	6.8	860.146	47.02	0
2019-01-01 20:15:00	1	0	0	6.8	860.201	45.78	0
2019-01-01 20:30:00	1	0	0	6.8	860.371	45.7333	0
2019-01-01 20:45:00	1	0	0	6.8	860.356	45.8667	0
2019-01-01 21:00:00	1	0	0	6.8	860.542	45.36	0
2019-01-01 21:15:00	1	0	0	6.8	860.588	44.8533	0
2019-01-01 21:30:00	1	0	0	6.8	860.657	44.3333	0
2019-01-01 21:45:00	1	0	0	6.8	860.787	44.4533	0
2019-01-01 22:00:00	1	0	0	6.8	860.987	44.8667	0
2019-01-01 22:15:00	1	0	0	6.8	861.19	44.0867	0
2019-01-01 22:30:00	1	0	0	6.8	861.313	44.62	0
2019-01-01 22:45:00	1	0	0	6.8	861.387	44.4067	0
2019-01-01 23:00:00	1	0	0	6.65333	861.425	45.3267	0
2019-01-01 23:15:00	1	0	0	5.7	861.593	48.02	0
2019-01-01 23:30:00	1	0	0	5.7	861.685	46.7	0
2019-01-01 23:45:00	1	0	0	5.7	861.891	49.5133	0
2019-01-02	1	0	0	5.7	861.96	46.78	0
2019-01-02 00:15:00	1	0	0	4.74667	862.099	50.8	0
2019-01-02 00:30:00	1	0	0	4.6	862.16	52.26	0
2019-01-02 00:45:00	1	0	0	4.6	862.284	51.9333	0
2019-01-02 01:00:00	1	0	0	4.6	862.283	51.7067	0
2019-01-02 01:15:00	1	0	0	4.6	862.381	51.66	0
2019-01-02 01:30:00	1	0	0	4.6	862.266	49.7067	0
2019-01-02 01:45:00	1	0	0	4.6	862.268	50.08	0
2019-01-02 02:00:00	1	0	0	4.6	862.367	50.76	0
2019-01-02 02:15:00	1	0	0	4.6	862.396	51.8067	0
2019-01-02 02:30:00	1	0	0	4.6	862.383	52.8933	0
2019-01-02 02:45:00	1	0	0	4.01333	862.412	53.54	0
2019-01-02 03:00:00	1	0	0	3.5	862.484	54.04	0
2019-01-02 03:15:00	1	0	0	3.5	862.58	52.9333	0
2019-01-02 03:30:00	1	0	0	3.5	862.626	53.1733	0
2019-01-02 03:45:00	1	0	0	2.85333	862.649	56.6867	0
2019-01-02 04:00:00	1	0	0	1.4	862.693	61.92	0
2019-01-02 04:15:00	1	0	0	1.4	862.723	62.32	0
2019-01-02 04:30:00	1	0	0	1.4	862.657	60	0
2019-01-02 04:45:00	1	0	0	1.4	862.632	59.62	0
2019-01-02 05:00:00	1	0	0	1.4	862.579	62.3333	0
2019-01-02 05:15:00	1	0	0	1.4	862.5	63.5533	0
2019-01-02 05:30:00	1	0	0	1.4	862.571	65.46	0
2019-01-02 05:45:00	1	0	0	0.666667	862.686	66.4933	0
2019-01-02 06:00:00	1	0	0	0.966667	862.61	62.8733	0
2019-01-02 06:15:00	1	0	0	1.3	862.595	61.14	0
2019-01-02 06:30:00	1	0	0	1.3	862.745	61.2	0
2019-01-02 06:45:00	1	0	0	1.3	862.842	62.5533	0
2019-01-02 07:00:00	1	0	0	1.03333	862.984	63.94	0
2019-01-02 07:15:00	1	0	0	0.3	863.175	67.38	0
2019-01-02 07:30:00	1	0	0	-0.433333	863.499	71.4867	0
2019-01-02 07:45:00	1	0	0	-0.8	863.718	72.9667	0
2019-01-02 08:00:00	1	0	0	-0.8	863.919	73.6267	0
2019-01-02 08:15:00	1.8	0.933333	1.29933	-0.8	864.185	72.9667	0
2019-01-02 08:30:00	9.26667	7.06667	7.95733	-0.8	864.356	72.8467	0.172
2019-01-02 08:45:00	88.6667	20.3333	72.1593	-0.4	864.54	68.3667	2.14733
2019-01-02 09:00:00	115.8	70.2	94.0307	0.733333	864.599	66.0667	4.734
2019-01-02 09:15:00	179.533	134.467	145.837	1.2	864.577	63.2733	7.23867
2019-01-02 09:30:00	310.133	170.867	251.828	2.44667	864.526	58.8267	9.86933
2019-01-02 09:45:00	502.533	196.267	408.381	2.59333	864.563	61.3067	12.2953
2019-01-02 10:00:00	581.933	241.267	473.071	2.3	864.563	62.7267	14.164
2019-01-02 10:15:00	631.467	278	513.238	2.66667	864.769	61.0267	15.7733
2019-01-02 10:30:00	692.267	319.8	562.285	3.69333	864.808	55.44	17.3773
2019-01-02 10:45:00	739	354.733	600.231	4.94	864.721	50.3067	18.7753
2019-01-02 11:00:00	781.2	381.067	634.877	5.67333	864.54	50.5533	19.9107
2019-01-02 11:15:00	822.533	390.333	668.33	4.5	864.419	54.5867	20.9673
2019-01-02 11:30:00	862.4	379.533	700.648	4.72	864.133	51.92	21.802
2019-01-02 11:45:00	904.067	354.867	734.318	5.6	863.78	47.6733	22.548
2019-01-02 12:00:00	935.8	315.533	759.977	5.6	863.537	47.02	23.164
2019-01-02 12:15:00	972.467	269	789.807	6.11333	863.303	46.08	23.82
2019-01-02 12:30:00	992.6	220.2	806.045	6.7	863.116	43.52	24.186
2019-01-02 12:45:00	1013.47	174.533	822.827	6.7	862.769	40.2	24.5573
2019-01-02 13:00:00	1031	137.133	837.442	7.8	862.375	37.2933	24.902
2019-01-02 13:15:00	1032.13	113.2	838.037	7.8	862.031	32.7533	24.92
2019-01-02 13:30:00	1027.47	94.6	834.357	8.09333	861.586	30.42	24.914
2019-01-02 13:45:00	1024.8	81.2	832.083	8.9	861.242	29.5533	24.7647
2019-01-02 14:00:00	1007.27	71.6667	817.574	9.26667	860.849	26.9267	24.538
2019-01-02 14:15:00	977	66.6667	793.053	10	860.513	28.4467	24.2333
2019-01-02 14:30:00	933.267	61.5333	757.541	10	860.247	28.1467	23.6907
2019-01-02 14:45:00	896.867	57.7333	727.768	10	859.954	28.3733	23.1693
2019-01-02 15:00:00	861.8	53.6	699.239	11.1	859.615	27.3667	22.5713
2019-01-02 15:15:00	821.8	49.2667	667.139	11.6867	859.469	26.32	21.7973
2019-01-02 15:30:00	781.933	46.0667	634.605	12.2	859.346	26.72	20.9213
2019-01-02 15:45:00	729.667	44.0667	592.327	12.2	859.243	29.7733	19.9407
2019-01-02 16:00:00	691.467	43.2	561.255	12.2	859.199	30.2867	18.9233
2019-01-02 16:15:00	654.4	42.4	530.831	12.2	859.09	28.9467	17.7633
2019-01-02 16:30:00	607.933	40.1333	493.317	12.2	859.029	31.2533	16.4827
2019-01-02 16:45:00	555.733	40.0667	450.93	12.2	858.99	34.1667	15.088
2019-01-02 17:00:00	492.467	37.4667	399.504	12.2	858.984	34.2267	13.276
2019-01-02 17:15:00	436.2	34.1333	354.032	12.2	858.991	34.4667	11.4527
2019-01-02 17:30:00	363.133	31.4	294.486	11.54	858.937	37.7333	9.21067
2019-01-02 17:45:00	278	27.0667	225.139	11.1	859.006	39.9067	6.55733
2019-01-02 18:00:00	192.133	21.4	155.689	10.1467	859.137	41.8467	4.02067
2019-01-02 18:15:00	113.733	13.9333	91.9207	9.78	859.25	43.62	1.982
2019-01-02 18:30:00	23.8667	3.93333	18.946	8.9	859.576	45.6133	0.322
2019-01-02 18:45:00	1	0	0.054	8.3	859.74	47.32	0
2019-01-02 19:00:00	1	0	0	7.9	859.933	47.1	0
2019-01-02 19:15:00	1	0	0	7.9	860.123	45.7333	0
2019-01-02 19:30:00	1	0	0	7.9	860.377	45.1467	0
2019-01-02 19:45:00	1	0	0	7.9	860.544	43.9733	0
2019-01-02 20:00:00	1	0	0	7.9	860.651	43.9867	0
2019-01-02 20:15:00	1	0	0	7.9	860.912	43.8333	0
2019-01-02 20:30:00	1	0	0	7.9	861.113	43.8933	0
2019-01-02 20:45:00	1	0	0	7.9	861.304	42.42	0
2019-01-02 21:00:00	1	0	0	7.46	861.335	43.9133	0
2019-01-02 21:15:00	1	0	0	6.8	861.313	45.7	0
2019-01-02 21:30:00	1	0	0	6.8	861.328	46.4067	0
2019-01-02 21:45:00	1	0	0	6.8	861.409	49.1667	0
2019-01-02 22:00:00	1	0	0	6.8	861.402	49.8867	0
2019-01-02 22:15:00	1	0	0	6.28667	861.343	51.08	0
2019-01-02 22:30:00	1	0	0	5.7	861.283	52.7333	0
2019-01-02 22:45:00	1	0	0	5.7	861.291	53.6467	0
2019-01-02 23:00:00	1	0	0	5.48	861.238	55.3067	0
2019-01-02 23:15:00	1	0	0	3.79333	861.306	58.3867	0
2019-01-02 23:30:00	1	0	0	4.16	861.159	56	0
2019-01-02 23:45:00	1	0	0	4.6	861.144	54.38	0
2019-01-03	1	0	0	4.6	861.136	56.7533	0
2019-01-03 00:15:00	1	0	0	4.6	861.16	56.1267	0
2019-01-03 00:30:00	1	0	0	4.6	861.16	58.3333	0
2019-01-03 00:45:00	1	0	0	4.6	861.112	61.0133	0
2019-01-03 01:00:00	1	0	0	4.6	861.191	62.76	0
2019-01-03 01:15:00	1	0	0	4.16	861.343	62.6133	0
2019-01-03 01:30:00	1	0	0	3.5	861.409	64.9133	0
2019-01-03 01:45:00	1	0	0	3.5	861.462	64.9067	0
2019-01-03 02:00:00	1	0	0	3.5	861.439	65.8	0
2019-01-03 02:15:00	1	0	0	3.5	861.533	67.3933	0
2019-01-03 02:30:00	1	0	0	3.5	861.447	68.9467	0
2019-01-03 02:45:00	1	0	0	3.5	861.365	69.6	0
2019-01-03 03:00:00	1	0	0	3.5	861.213	70.9733	0
2019-01-03 03:15:00	1	0	0	3.5	861.065	69.22	0
2019-01-03 03:30:00	1	0	0	3.5	860.773	66.2933	0
2019-01-03 03:45:00	1	0	0	3.28	860.565	70.8533	0
2019-01-03 04:00:00	1	0	0	2.54667	860.542	72.28	0
2019-01-03 04:15:00	1	0	0	3.5	860.437	66.3267	0
2019-01-03 04:30:00	1	0	0	3.5	860.271	63.5533	0
2019-01-03 04:45:00	1	0	0	3.5	860.224	63.8733	0
2019-01-03 05:00:00	1	0	0	3.5	860.232	65.1467	0
2019-01-03 05:15:00	1	0	0	3.5	860.137	64.6067	0
2019-01-03 05:30:00	1	0	0	3.5	860.074	62.4	0
2019-01-03 05:45:00	1	0	0	3.5	860.117	61.28	0
2019-01-03 06:00:00	1	0	0	3.5	860.029	59.78	0
2019-01-03 06:15:00	1	0	0	3.5	859.955	58.6867	0
2019-01-03 06:30:00	1	0	0	3.5	859.977	57.9933	0
2019-01-03 06:45:00	1	0	0	3.5	860.021	57.1867	0
2019-01-03 07:00:00	1	0	0	3.5	860.208	57.1067	0
2019-01-03 07:15:00	1	0	0	3.5	860.256	57.14	0
2019-01-03 07:30:00	1	0	0	3.5	860.393	56.8733	0
2019-01-03 07:45:00	1	0	0	3.5	860.467	55.12	0
2019-01-03 08:00:00	1	0	0	3.5	860.565	54.68	0
2019-01-03 08:15:00	2.6	0.933333	2.218	1.6	860.818	62.9467	0
2019-01-03 08:30:00	11.2667	7.33333	9.63667	2.13333	860.941	60.88	0.182
2019-01-03 08:45:00	90.0667	20.6667	73.2427	2.4	861.089	58.7	1.818
2019-01-03 09:00:00	135.8	68	110.216	3.42667	861.152	54.9333	4.21867
2019-01-03 09:15:00	163.867	128.667	132.952	3.5	861.208	54.3933	6.77267
2019-01-03 09:30:00	305.6	166.133	248.093	3.5	861.183	54.1533	9.512
2019-01-03 09:45:00	490	193.733	398.259	3.5	861.207	53.1	11.9167
2019-01-03 10:00:00	584.133	242.133	474.803	4.38	861.144	51.1733	14.0187
2019-01-03 10:15:00	643.8	282.333	523.361	4.6	861.176	48.6	15.956
2019-01-03 10:30:00	696.067	319.467	565.477	4.6	861.261	47.34	17.5193
2019-01-03 10:45:00	736.867	349.067	598.552	5.7	861.283	45.42	18.7293
2019-01-03 11:00:00	773.067	367.267	627.893	5.7	861.261	45.68	19.742
2019-01-03 11:15:00	817.467	372.6	663.89	5.77333	861.097	44.94	20.8307
2019-01-03 11:30:00	862.667	367.533	700.593	6.8	860.78	40.92	22.092
2019-01-03 11:45:00	921.067	344.533	747.907	6.8	860.207	35.2333	23.366
2019-01-03 12:00:00	948.067	288.867	769.667	7.75333	859.832	33.52	24.0627
2019-01-03 12:15:00	978.733	241.133	794.84	7.9	859.585	32.38	24.5307
2019-01-03 12:30:00	1000.33	196.333	812.217	7.96667	859.258	32.0333	24.9873
2019-01-03 12:45:00	1015.67	156.267	824.777	8.9	858.898	30.56	25.36
2019-01-03 13:00:00	1022.7	126.7	830.433	8.9	858.601	29.82	25.481
2019-01-03 13:15:00	1039.33	106.667	843.939	8.9	858.054	27.2133	25.868
2019-01-03 13:30:00	995.333	92.8667	808.265	8.9	857.695	25.1267	24.2493
2019-01-03 13:45:00	861.733	85.9333	699.727	9.56	857.362	23.6133	22.1687
2019-01-03 14:00:00	839.4	90.3333	681.648	10	857.005	23.0533	20.504
2019-01-03 14:15:00	706.3	95.4	573.597	10	856.695	22.85	17.047
2019-01-03 14:30:00	606.8	104.467	492.668	11.1	856.305	20.7667	15.2533
2019-01-03 14:45:00	678.133	95.2667	550.481	11.1	855.951	21.06	17.3893
2019-01-03 15:00:00	673.067	83.2667	546.53	11.1	855.838	21.7667	18.3047
2019-01-03 15:15:00	624.067	65.9333	506.741	11.1	855.525	19.46	16.518
2019-01-03 15:30:00	641	72.6667	520.492	11.1	855.607	20.9667	16.6547
2019-01-03 15:45:00	769.4	65.1333	624.537	11.1	855.537	21.1733	20.402
2019-01-03 16:00:00	699.933	60.7333	568.453	11.1	855.499	19.6933	18.408
2019-01-03 16:15:00	674.6	58	547.506	11.1	855.491	19.7467	17.5907
2019-01-03 16:30:00	622.067	53.2667	504.902	11.1	855.595	19.8867	15.818
2019-01-03 16:45:00	589.133	61.2	478.106	11.1	855.616	20.24	15.066
2019-01-03 17:00:00	355.267	48.4667	288.368	11.1	855.814	20.84	9.49333
2019-01-03 17:15:00	290.067	50.8	235.425	11.1	855.937	21.36	7.766
2019-01-03 17:30:00	307.867	64.4	249.772	11.1	856.192	21.84	8.2
2019-01-03 17:45:00	190.8	50.4	154.768	11.1	856.434	22.7933	4.77
2019-01-03 18:00:00	142.467	45	115.521	10.7333	856.473	23.9	3.03267
2019-01-03 18:15:00	117.6	22.4667	95.1673	10	856.636	24.8267	2.092
2019-01-03 18:30:00	26.6667	6.2	21.2747	9.92667	856.783	27.0267	0.395333
2019-01-03 18:45:00	0.133333	0	0.054	8.9	856.945	28.9667	0
2019-01-03 19:00:00	0	0	0	8.9	857.173	29.76	0
2019-01-03 19:15:00	0	0	0	8.56667	857.401	31.5733	0
2019-01-03 19:30:00	0	0	0	7.9	857.611	35.1733	0
2019-01-03 19:45:00	0	0	0	7.9	857.711	36.3133	0
2019-01-03 20:00:00	0	0	0	7.9	857.811	36.5533	0
2019-01-03 20:15:00	0	0	0	7.9	857.887	35.88	0
2019-01-03 20:30:00	0	0	0	7.9	857.971	30.89	0
2019-01-03 20:45:00	0	0	0	7.9	858.071	30.96	0
2019-01-03 21:00:00	0	0	0	7.9	858.123	32.0133	0
2019-01-03 21:15:00	0	0	0	7.82667	858.137	32.34	0
2019-01-03 21:30:00	0	0	0	6.8	858.196	32.4933	0
2019-01-03 21:45:00	0	0	0	6.8	858.312	32.04	0
2019-01-03 22:00:00	0	0	0	6.8	858.408	31.6067	0
2019-01-03 22:15:00	0	0	0	6.8	858.463	31.3133	0
2019-01-03 22:30:00	0	0	0	6.8	858.524	30.62	0
2019-01-03 22:45:00	0	0	0	6.8	858.553	30.32	0
2019-01-03 23:00:00	0	0	0	6.8	858.598	30.1333	0
2019-01-03 23:15:00	0	0	0	6.8	858.62	30.84	0
2019-01-03 23:30:00	0	0	0	6.50667	858.75	32.56	0
2019-01-03 23:45:00	0	0	0	5.7	858.836	32.6333	0
2019-01-04	0	0	0	5.7	858.875	32.6533	0
2019-01-04 00:15:00	0	0	0	5.7	858.991	32.7867	0
2019-01-04 00:30:00	0	0	0	5.7	859.067	32.4933	0
2019-01-04 00:45:00	0	0	0	5.7	859.145	32.5133	0
2019-01-04 01:00:00	0	0	0	5.7	859.333	32.26	0
2019-01-04 01:15:00	0	0	0	5.7	859.546	32.3133	0
2019-01-04 01:30:00	0	0	0	5.7	859.636	31.7267	0
2019-01-04 01:45:00	0	0	0	5.7	859.668	31.5733	0
2019-01-04 02:00:00	0	0	0	5.11333	859.756	31.14	0
2019-01-04 02:15:00	0	0	0	4.6	859.865	30.3333	0
2019-01-04 02:30:00	0	0	0	4.6	859.955	29.92	0
2019-01-04 02:45:00	0	0	0	4.6	860.037	29.1467	0
2019-01-04 03:00:00	0	0	0	4.6	860.286	29.4933	0
2019-01-04 03:15:00	0	0	0	4.6	860.271	29.5	0
2019-01-04 03:30:00	0	0	0	4.6	860.311	29.48	0
2019-01-04 03:45:00	0	0	0	4.6	860.232	28.9867	0
2019-01-04 04:00:00	0	0	0	4.6	860.192	29.7733	0
2019-01-04 04:15:00	0	0	0	3.57333	860.208	31.02	0
2019-01-04 04:30:00	0	0	0	3.5	860.216	31.4467	0
2019-01-04 04:45:00	0	0	0	3.5	860.184	31.4667	0
2019-01-04 05:00:00	0	0	0	3.5	860.113	31.0667	0
2019-01-04 05:15:00	0	0	0	3.5	860.014	30.0267	0
2019-01-04 05:30:00	0	0	0	3.5	860.075	30.02	0
2019-01-04 05:45:00	0	0	0	3.5	859.978	31.1667	0
2019-01-04 06:00:00	0	0	0	3.42667	859.985	31.7867	0
2019-01-04 06:15:00	0	0	0	0.8	860.169	42.8533	0
2019-01-04 06:30:00	0	0	0	0.3	860.264	42.5533	0
2019-01-04 06:45:00	0	0	0	0.566667	860.363	39.9333	0
2019-01-04 07:00:00	0	0	0	1.3	860.437	37.1867	0
2019-01-04 07:15:00	0	0	0	1.3	860.43	35.1533	0
2019-01-04 07:30:00	0	0	0	1.3	860.369	35.1533	0
2019-01-04 07:45:00	0	0	0	1.3	860.303	37.04	0
2019-01-04 08:00:00	0	0	0	1.3	860.416	38.5467	0
2019-01-04 08:15:00	0.933333	0.666667	0.974667	1.3	860.657	37.9333	0
2019-01-04 08:30:00	7.46667	5.86667	6.60333	1.3	860.949	38.58	0.076667
2019-01-04 08:45:00	107.667	20.6667	87.5887	1.59333	861.261	36.06	2.104
2019-01-04 09:00:00	188.6	74	153.145	2.33333	861.303	36.4067	4.96333
2019-01-04 09:15:00	155.733	137.4	126.13	2	861.335	36.9667	7.52
2019-01-04 09:30:00	323.4	174	262.6	1.17333	861.41	43.1067	10.242
2019-01-04 09:45:00	521.333	200.067	423.592	0.7	861.432	44.5267	12.6793
2019-01-04 10:00:00	611.8	248.333	497.268	2.32667	861.693	39.98	14.654
2019-01-04 10:15:00	659.933	283.4	536.247	2.4	862.007	39.2733	16.258
2019-01-04 10:30:00	709.8	318.067	576.52	3.13333	862.045	40.4333	17.6933
2019-01-04 10:45:00	754.2	347.667	612.573	3.79333	862.061	37.1133	19.128
2019-01-04 11:00:00	796.2	364.533	646.785	5.40667	862.199	30.4667	20.2393
2019-01-04 11:15:00	838.733	360.2	681.376	6.8	862.068	28.0067	21.1753
2019-01-04 11:30:00	884.067	336.467	718.187	6.8	861.792	26.8267	22.0827
2019-01-04 11:45:00	920.867	299.2	747.799	6.8	861.592	25.34	22.7673
2019-01-04 12:00:00	948	255.733	769.723	6.8	861.303	24.7933	23.318
2019-01-04 12:15:00	987.267	212.333	801.823	6.8	861.097	24.68	24.1527
2019-01-04 12:30:00	1008.93	170.133	819.146	7.53333	860.695	23.5133	24.59
2019-01-04 12:45:00	1020.33	133.933	828.673	7.9	860.339	23.6467	24.89
2019-01-04 13:00:00	1016.07	107.067	825.047	8.23333	859.954	21.5533	24.9687
2019-01-04 13:15:00	1041.33	100.2	845.509	8.9	859.608	22.06	24.4787
2019-01-04 13:30:00	1032.4	93.1333	838.254	8.9	859.097	19.9333	24.2053
2019-01-04 13:45:00	1032.13	72.8667	838.037	9.78	858.415	16.0133	24.6493
2019-01-04 14:00:00	1025.13	63.8	832.355	10	858.153	14.0067	25.0267
2019-01-04 14:15:00	997.133	58.7333	809.672	10	858.001	12.64	24.738
2019-01-04 14:30:00	966.333	58.3333	784.501	10	857.549	11.7267	24.4347
2019-01-04 14:45:00	923.267	55.7333	749.801	10	857.533	12.18	23.7007
2019-01-04 15:00:00	889.267	56.9333	722.247	10.5133	857.312	11.8267	23.088
2019-01-04 15:15:00	849.4	56.1333	689.658	11.1	857.195	10.8733	22.402
2019-01-04 15:30:00	819.733	59.3333	665.571	10.7333	857.363	11.3067	21.4987
2019-01-04 15:45:00	772.933	51.8	627.404	10	857.333	11.1933	20.452
2019-01-04 16:00:00	731.8	50.2	593.788	10.8067	857.201	11.4933	19.266
2019-01-04 16:15:00	686.467	47.8	556.978	11.1	857.163	11.2667	17.9973
2019-01-04 16:30:00	641.933	45.8667	520.87	11.1	857.149	11.5067	16.5867
2019-01-04 16:45:00	589.533	41.9333	478.268	11.1	857.051	11.8133	14.9953
2019-01-04 17:00:00	532.467	38.8667	432.038	11.1	857.089	12.12	13.2987
2019-01-04 17:15:00	467.933	35.9333	379.475	11.1	857.006	12.3867	11.4467
2019-01-04 17:30:00	392.733	33.2667	318.359	11.1	856.92	12.6667	9.348
2019-01-04 17:45:00	305.667	28.5333	247.879	11.1	857.223	13.0733	6.81133
2019-01-04 18:00:00	218.333	22.8667	177.017	11.1	856.89	13.4933	4.416
2019-01-04 18:15:00	130.333	15.5333	105.397	10.9533	857.195	14.1067	2.264
2019-01-04 18:30:00	33.3333	4.93333	26.5787	9.92667	857.519	15.4333	0.495333
2019-01-04 18:45:00	0.266667	0	0.162	8.9	857.68	16.9333	0
2019-01-04 19:00:00	0	0	0	8.9	857.887	18.1067	0
2019-01-04 19:15:00	0	0	0	8.63333	858.025	19.6333	0
2019-01-04 19:30:00	0	0	0	7.9	858.421	22.32	0
2019-01-04 19:45:00	0	0	0	7.9	858.658	21.1467	0
2019-01-04 20:00:00	0	0	0	7.9	858.96	21.22	0
2019-01-04 20:15:00	0	0	0	7.9	859.105	21.8867	0
2019-01-04 20:30:00	0	0	0	7.9	859.153	22.34	0
2019-01-04 20:45:00	0	0	0	7.9	859.213	23.02	0
2019-01-04 21:00:00	0	0	0	7.9	859.493	23.7467	0
2019-01-04 21:15:00	0	0	0	7.46	859.7	24.38	0
2019-01-04 21:30:00	0	0	0	6.8	859.82	25.2867	0
2019-01-04 21:45:00	0	0	0	6.8	859.796	25.4933	0
2019-01-04 22:00:00	0	0	0	6.8	859.903	25.8067	0
2019-01-04 22:15:00	0	0	0	6.8	860.107	25.9133	0
2019-01-04 22:30:00	0	0	0	6.8	860.279	26.0133	0
2019-01-04 22:45:00	0	0	0	6.8	860.43	25.3667	0
2019-01-04 23:00:00	0	0	0	6.8	860.629	24.2933	0
2019-01-04 23:15:00	0	0	0	6.8	860.726	23.1267	0
2019-01-04 23:30:00	0	0	0	6.28667	860.834	23.3867	0
2019-01-04 23:45:00	0	0	0	5.7	860.995	23.5667	0
2019-01-05	0	0	0	5.7	860.979	22.98	0
2019-01-05 00:15:00	0	0	0	5.7	861.112	24.5733	0
2019-01-05 00:30:00	0	0	0	4.67333	861.229	25.6733	0
2019-01-05 00:45:00	0	0	0	4.6	861.313	25.1	0
2019-01-05 01:00:00	0	0	0	4.6	861.231	23.2133	0
2019-01-05 01:15:00	0	0	0	4.6	861.192	23.1	0
2019-01-05 01:30:00	0	0	0	4.6	861.291	22.2667	0
2019-01-05 01:45:00	0	0	0	4.6	861.306	21.1133	0
2019-01-05 02:00:00	0	0	0	4.6	861.394	21.1667	0
2019-01-05 02:15:00	0	0	0	4.6	861.448	20.4333	0
2019-01-05 02:30:00	0	0	0	4.56	861.608	20.1533	0
2019-01-05 02:45:00	0	0	0	4.6	861.808	20	0
2019-01-05 03:00:00	0	0	0	4.6	861.832	20.5333	0
2019-01-05 03:15:00	0	0	0	4.6	861.615	20.6	0
2019-01-05 03:30:00	0	0	0	3.64667	861.631	21.4267	0
2019-01-05 03:45:00	0	0	0	3.5	861.471	21.4933	0
2019-01-05 04:00:00	0	0	0	3.5	861.372	21	0
2019-01-05 04:15:00	0	0	0	3.5	861.231	20.7133	0
2019-01-05 04:30:00	0	0	0	3.5	861.151	21.0467	0
2019-01-05 04:45:00	0	0	0	3.5	861.253	20.4467	0
2019-01-05 05:00:00	0	0	0	3.5	861.395	20.5533	0
2019-01-05 05:15:00	0	0	0	3.5	861.569	20.52	0
2019-01-05 05:30:00	0	0	0	3.5	861.815	20.3933	0
2019-01-05 05:45:00	0	0	0	3.42667	861.891	21.86	0
2019-01-05 06:00:00	0	0	0	2.4	861.952	22.84	0
2019-01-05 06:15:00	0	0	0	2.4	862.284	22.3267	0
2019-01-05 06:30:00	0	0	0	2.4	862.477	22.2267	0
2019-01-05 06:45:00	0	0	0	2.4	862.699	20.9733	0
2019-01-05 07:00:00	0	0	0	2.4	862.951	21.5667	0
2019-01-05 07:15:00	0	0	0	2.4	863.281	22.2467	0
2019-01-05 07:30:00	0	0	0	2.4	863.53	22.34	0
2019-01-05 07:45:00	0	0	0	2.4	863.709	22.6467	0
2019-01-05 08:00:00	0	0	0	2.4	864.035	22.7667	0
2019-01-05 08:15:00	0.533333	0.6	0.649333	2.4	864.095	23.42	0
2019-01-05 08:30:00	6	5	5.359	2.4	864.117	22.27	0
2019-01-05 08:45:00	117.8	22.1333	95.7627	2.54667	864.268	21.2467	2.12267
2019-01-05 09:00:00	224.533	75.4	182.32	4.22	864.34	18.7533	4.966
2019-01-05 09:15:00	155.8	137.133	126.349	5.50667	864.324	16.0267	7.434
2019-01-05 09:30:00	330.8	174.133	268.611	6.24	864.363	16.2333	10.122
2019-01-05 09:45:00	532.133	199.867	432.201	4.7	864.684	21.2067	12.6007
2019-01-05 10:00:00	623.6	247.6	506.742	3.7	864.893	26.6333	14.6553
2019-01-05 10:15:00	676.333	284.8	549.237	4.03333	865.059	25.02	16.392
2019-01-05 10:30:00	724.333	316.867	588.375	4.7	865.284	24.48	17.77
2019-01-05 10:45:00	767.067	340.533	622.913	4.7	865.445	26.7267	19.06
2019-01-05 11:00:00	804.8	350.4	653.985	4.7	865.49	25.7667	20.2333
2019-01-05 11:15:00	846.533	339.133	687.493	5.72667	865.534	23.5667	21.232
2019-01-05 11:30:00	886.533	308.867	719.865	6.68	865.534	21.3	22.028
2019-01-05 11:45:00	927.533	270.4	753.101	7.56	865.276	18.08	22.7607
2019-01-05 12:00:00	970.933	227.933	788.507	8	865.09	13.1867	23.3527
2019-01-05 12:15:00	1000.4	185.8	812.541	8	864.879	12.64	23.1507
2019-01-05 12:30:00	1033.2	150.4	838.796	8.51333	864.799	12.2533	24.47
2019-01-05 12:45:00	1047.33	115.867	850.327	9.1	864.409	9.82667	24.8107
2019-01-05 13:00:00	1065.8	90.4	865.429	9.1	863.803	8.04667	25.23
2019-01-05 13:15:00	1068.87	76.0667	867.649	9.39333	863.321	7.68667	25.288
2019-01-05 13:30:00	1041.93	66	845.942	10.2	862.875	7.00667	24.8353
2019-01-05 13:45:00	1054.13	59.6	855.957	10.2	862.538	7.2	25.0867
2019-01-05 14:00:00	1041.13	52.6	845.399	10.2	862.207	6.91333	25
2019-01-05 14:15:00	1013.07	47.9333	822.393	10.2	861.892	6.91333	24.6713
2019-01-05 14:30:00	975.6	44.1333	791.861	10.9333	861.585	6.1	24.23
2019-01-05 14:45:00	938.933	43.8	762.197	11.3	861.35	5.98667	23.8273
2019-01-05 15:00:00	897.667	41.6667	728.473	11.3733	861.143	5.96	23.1267
2019-01-05 15:15:00	855.8	38.4	694.531	12.4	860.887	5.24	22.272
2019-01-05 15:30:00	815.267	36.6667	661.455	12.4	860.673	5.41333	21.474
2019-01-05 15:45:00	770.933	36.6667	625.619	12.9133	860.499	5.52667	20.5727
2019-01-05 16:00:00	722.133	37.2667	586.155	13.5	860.379	5.09333	19.3773
2019-01-05 16:15:00	688.067	37.8	558.222	13.5	860.355	5.56	18.488
2019-01-05 16:30:00	639.267	34.2667	518.977	13.5	860.216	7.58	17.284
2019-01-05 16:45:00	596.533	34.8667	483.789	12.6933	859.978	15.28	16.0427
2019-01-05 17:00:00	538.6	33.4	437.017	12.4	859.857	15.1267	14.4613
2019-01-05 17:15:00	477.133	31.8	387.053	12.3067	859.804	16.42	12.5473
2019-01-05 17:30:00	397.667	30	322.634	12.3	859.843	16.6	10.0453
2019-01-05 17:45:00	317.467	25.2	257.458	12.3	859.947	16.1867	7.55
2019-01-05 18:00:00	236.8	20.5333	191.74	12.3	859.795	15.6867	5.04333
2019-01-05 18:15:00	142.333	13.4	115.359	11.7133	859.842	15.2667	2.53533
2019-01-05 18:30:00	41.8667	4.06667	33.5627	11.2	859.577	15.52	0.689333
2019-01-05 18:45:00	1	0	0	10.1	859.577	15.52	0
2019-01-05 19:00:00	1	0	0	10.1	859.939	14.7467	0
2019-01-05 19:15:00	1	0	0	10.1	860.161	14.7533	0
2019-01-05 19:30:00	1	0	0	9.66	860.286	15.26	0
2019-01-05 19:45:00	1	0	0	9	860.49	15.9667	0
2019-01-05 20:00:00	1	0	0	9	860.689	15.6667	0
2019-01-05 20:15:00	1	0	0	9	860.965	15.52	0
2019-01-05 20:30:00	1	0	0	9	861.237	16.2267	0
2019-01-05 20:45:00	1	0	0	9	861.555	16.32	0
2019-01-05 21:00:00	1	0	0	9	861.815	14.96	0
2019-01-05 21:15:00	1	0	0	8.04667	862.015	17.3533	0
2019-01-05 21:30:00	1	0	0	7.9	862.153	20.2	0
2019-01-05 21:45:00	1	0	0	7.9	862.453	21.72	0
2019-01-05 22:00:00	1	0	0	7.68	862.523	22.42	0
2019-01-05 22:15:00	1	0	0	6.8	862.76	22.7333	0
2019-01-05 22:30:00	1	0	0	6.8	862.944	23.1933	0
2019-01-05 22:45:00	1	0	0	6.8	862.813	26.9133	0
2019-01-05 23:00:00	1	0	0	6.8	862.564	28.2067	0
2019-01-05 23:15:00	1	0	0	6.8	862.512	27.52	0
2019-01-05 23:30:00	1	0	0	6.8	862.383	28.3133	0
2019-01-05 23:45:00	1	0	0	6.8	862.26	32.64	0
2019-01-06	1	0	0	6.8	862.213	34.2067	0
2019-01-06 00:15:00	1	0	0	6.8	862.268	34.96	0
2019-01-06 00:30:00	1	0	0	6.28667	862.291	36.7067	0
2019-01-06 00:45:00	1	0	0	5.7	862.083	39.8	0
2019-01-06 01:00:00	1	0	0	4.23333	861.975	35.38	0
2019-01-06 01:15:00	1	0	0	3.72	862.092	33.5333	0
2019-01-06 01:30:00	1	0	0	4.6	862.099	29.22	0
2019-01-06 01:45:00	1	0	0	5.7	862.021	28.92	0
2019-01-06 02:00:00	1	0	0	5.7	861.937	32.92	0
2019-01-06 02:15:00	1	0	0	5.7	861.968	34.2733	0
2019-01-06 02:30:00	1	0	0	5.62667	861.999	35.64	0
2019-01-06 02:45:00	1	0	0	4.6	861.914	38.2533	0
2019-01-06 03:00:00	1	0	0	4.6	861.793	36.1667	0
2019-01-06 03:15:00	1	0	0	4.6	861.677	36.46	0
2019-01-06 03:30:00	1	0	0	4.6	861.593	38.1267	0
2019-01-06 03:45:00	1	0	0	4.6	861.524	37.7267	0
2019-01-06 04:00:00	1	0	0	4.30667	861.423	38.4067	0
2019-01-06 04:15:00	1	0	0	2.13333	861.343	43.24	0
2019-01-06 04:30:00	1	0	0	2.4	861.335	42.98	0
2019-01-06 04:45:00	1	0	0	2.4	861.35	43.6867	0
2019-01-06 05:00:00	1	0	0	2.4	861.313	43.0533	0
2019-01-06 05:15:00	1	0	0	2.4	861.208	43.3267	0
2019-01-06 05:30:00	1	0	0	2.4	861.112	41.8467	0
2019-01-06 05:45:00	1	0	0	2.4	861.01	42.1467	0
2019-01-06 06:00:00	1	0	0	2.4	861.104	42.7933	0
2019-01-06 06:15:00	1	0	0	2.4	861.159	43.3067	0
2019-01-06 06:30:00	1	0	0	2.4	861.321	45.1533	0
2019-01-06 06:45:00	1	0	0	2.4	861.424	46.9733	0
2019-01-06 07:00:00	1	0	0	2.4	861.485	47.14	0
2019-01-06 07:15:00	1	0	0	2.4	861.617	46.8467	0
2019-01-06 07:30:00	1	0	0	2.4	861.654	47.74	0
2019-01-06 07:45:00	1	0	0	1.86667	861.708	50.68	0
2019-01-06 08:00:00	1	0	0	1.4	861.854	49.6867	0
2019-01-06 08:15:00	1.26667	0.466667	0.703333	1.4	861.968	49.04	0
2019-01-06 08:30:00	7.66667	5.4	6.65867	1.4	862.121	50.4	0.076667
2019-01-06 08:45:00	100.6	21.5333	81.8507	1.4	862.305	52.66	1.828
2019-01-06 09:00:00	220.2	69.0667	178.802	2.06667	862.436	50.0133	4.47667
2019-01-06 09:15:00	164	124.333	133.006	1.4	862.405	52.0867	6.97067
2019-01-06 09:30:00	314	159.467	254.913	2.70667	862.306	46.54	9.57667
2019-01-06 09:45:00	499.067	187.067	405.351	5.48	862.314	39.88	12.008
2019-01-06 10:00:00	591.4	227.6	480.65	4.96667	862.375	42.42	14.0533
2019-01-06 10:15:00	641.933	263.4	521.415	4.82	862.516	41.4867	15.7287
2019-01-06 10:30:00	692.133	293.133	562.282	5.7	862.587	40.3	17.2033
2019-01-06 10:45:00	731.867	310.2	594.275	5.7	862.677	41.48	18.426
2019-01-06 11:00:00	760.933	310.667	617.66	5.7	862.775	40.6733	19.3847
2019-01-06 11:15:00	806.8	296.2	655.283	5.7	862.753	39.3267	20.4753
2019-01-06 11:30:00	855.6	265.067	694.801	6.8	862.469	37.2133	21.4787
2019-01-06 11:45:00	903.4	229.6	733.724	7.68	862.16	35.34	22.3287
2019-01-06 12:00:00	943	190.667	765.878	8.76667	861.875	29.86	22.9607
2019-01-06 12:15:00	977.067	154.133	793.378	9.85333	861.517	27.1933	23.5153
2019-01-06 12:30:00	1005.27	123.2	816.385	10	861.197	24.4533	24.01
2019-01-06 12:45:00	1012.4	99.9333	822.175	10	860.788	24.08	24.1507
2019-01-06 13:00:00	1029.6	81.4667	836.033	11.0267	860.301	22.2467	24.7773
2019-01-06 13:15:00	1029.27	72	835.656	11.1	860.069	22.2867	24.758
2019-01-06 13:30:00	1035.4	62.6	840.635	11.6133	859.608	20.18	24.84
2019-01-06 13:45:00	1027	56.5333	833.708	12.7133	859.182	17.02	24.7427
2019-01-06 14:00:00	1015.6	51.0667	824.342	13.3	858.638	15.2667	24.6553
2019-01-06 14:15:00	996.533	49.4	809.023	14.1067	858.085	13.1267	24.9167
2019-01-06 14:30:00	960.8	46.2	779.954	14.4	857.887	12.3067	24.6393
2019-01-06 14:45:00	923.933	45.0667	750.181	14.4	857.611	11.9333	24.2133
2019-01-06 15:00:00	887.733	43.8	720.353	15.06	857.402	11.1067	23.5173
2019-01-06 15:15:00	850.867	43.3333	690.633	15.5	857.18	10.44	22.878
2019-01-06 15:30:00	814.067	41.6667	660.642	15.5	857.051	9.94	22.0447
2019-01-06 15:45:00	772.533	40.7333	626.973	15.5	857.013	9.7	21.1687
2019-01-06 16:00:00	729.2	40.1333	591.731	15.5	856.884	9.15333	20.172
2019-01-06 16:15:00	685.867	39.3333	556.383	15.5	856.951	9.80667	18.9307
2019-01-06 16:30:00	643.933	37.7333	522.441	15.5	856.875	9.47333	17.626
2019-01-06 16:45:00	593	36.6667	481.137	15.5	856.936	10.0667	16.068
2019-01-06 17:00:00	540.267	35	438.263	15.5	856.929	10.56	14.4153
2019-01-06 17:15:00	477.6	33.2667	387.271	15.5	857.013	10.9667	12.4713
2019-01-06 17:30:00	402.8	30.2667	326.749	15.5	857.113	11.2133	10.1947
2019-01-06 17:45:00	319.133	26.8667	258.703	15.5	857.104	11.76	7.602
2019-01-06 18:00:00	233.667	22.2	189.468	15.5	857.217	12.56	5.01533
2019-01-06 18:15:00	147.733	15	119.689	14.5467	857.456	13.3	2.71
2019-01-06 18:30:00	45.0667	5.53333	36.16	14.18	857.551	14.34	0.704
2019-01-06 18:45:00	0.666667	0	0.378667	13.3	857.711	14.7	0
2019-01-06 19:00:00	0	0	0	13.3	857.902	14.98	0
2019-01-06 19:15:00	0	0	0	13.3	858.123	15.14	0
2019-01-06 19:30:00	0	0	0	12.2	858.399	16.2733	0
2019-01-06 19:45:00	0	0	0	12.2	858.635	16.7067	0
2019-01-06 20:00:00	0	0	0	12.2	858.757	16.28	0
2019-01-06 20:15:00	0	0	0	12.2	858.938	16.58	0
2019-01-06 20:30:00	0	0	0	12.2	859.212	16.4467	0
2019-01-06 20:45:00	0	0	0	12.2	859.393	16.5067	0
2019-01-06 21:00:00	0	0	0	11.76	859.538	16.86	0
2019-01-06 21:15:00	0	0	0	11.1	859.6	16.3	0
2019-01-06 21:30:00	0	0	0	11.1	859.756	16.1933	0
2019-01-06 21:45:00	0	0	0	11.1	859.856	16.28	0
2019-01-06 22:00:00	0	0	0	11.1	860.021	16.4333	0
2019-01-06 22:15:00	0	0	0	11.1	860.129	16.8867	0
2019-01-06 22:30:00	0	0	0	11.1	860.255	17.16	0
2019-01-06 22:45:00	0	0	0	11.1	860.31	17.5133	0
2019-01-06 23:00:00	0	0	0	10.9533	860.311	17.54	0
2019-01-06 23:15:00	0	0	0	10	860.324	18.0133	0
2019-01-06 23:30:00	0	0	0	10	860.386	18.5	0
2019-01-06 23:45:00	0	0	0	10	860.474	18.74	0
2019-01-07	0	0	0	10	860.43	18.7667	0
2019-01-07 00:15:00	0	0	0	8.88	860.437	19.5933	0
2019-01-07 00:30:00	0	0	0	8.8	860.505	19.7933	0
2019-01-07 00:45:00	0	0	0	8.8	860.535	19.4467	0
2019-01-07 01:00:00	0	0	0	8.8	860.635	19.8333	0
2019-01-07 01:15:00	0	0	0	8.8	860.58	19.5467	0
2019-01-07 01:30:00	0	0	0	8.8	860.643	19.0733	0
2019-01-07 01:45:00	0	0	0	8.8	860.749	18.7733	0
2019-01-07 02:00:00	0	0	0	8.8	860.849	18.9867	0
2019-01-07 02:15:00	0	0	0	8.8	860.995	19.0267	0
2019-01-07 02:30:00	0	0	0	8.8	861.073	19.0133	0
2019-01-07 02:45:00	0	0	0	8.8	861.065	19.3533	0
2019-01-07 03:00:00	0	0	0	8.8	861.033	19.32	0
2019-01-07 03:15:00	0	0	0	7.7	860.889	19.22	0
2019-01-07 03:30:00	0	0	0	7.7	860.911	19.1867	0
2019-01-07 03:45:00	0	0	0	7.7	860.817	19.3267	0
2019-01-07 04:00:00	0	0	0	7.7	860.659	19.5067	0
2019-01-07 04:15:00	0	0	0	7.7	860.573	19.32	0
2019-01-07 04:30:00	0	0	0	7.7	860.565	19.7333	0
2019-01-07 04:45:00	0	0	0	7.7	860.408	19.66	0
2019-01-07 05:00:00	0	0	0	7.7	860.37	19.7533	0
2019-01-07 05:15:00	0	0	0	7.7	860.327	19.1267	0
2019-01-07 05:30:00	0	0	0	7.7	860.279	19.2933	0
2019-01-07 05:45:00	0	0	0	7.7	860.216	19.3	0
2019-01-07 06:00:00	0	0	0	7.7	860.184	19.0133	0
2019-01-07 06:15:00	0	0	0	7.7	860.24	18.88	0
2019-01-07 06:30:00	0	0	0	7.7	860.287	18.96	0
2019-01-07 06:45:00	0	0	0	7.7	860.407	19.1933	0
2019-01-07 07:00:00	0	0	0	7.7	860.534	19.4067	0
2019-01-07 07:15:00	0	0	0	7.48	860.643	19.6533	0
2019-01-07 07:30:00	0	0	0	6.6	860.825	20.7867	0
2019-01-07 07:45:00	0	0	0	6.23333	861.027	22.1867	0
2019-01-07 08:00:00	0	0	0	4.62	861.267	25.12	0
2019-01-07 08:15:00	0.4	0.266667	0.486667	4.4	861.501	25.3267	0
2019-01-07 08:30:00	6.26667	4.73333	5.468	4.4	861.699	24.7067	0
2019-01-07 08:45:00	102.2	21.9333	83.094	4.76667	861.861	23.52	2.00333
2019-01-07 09:00:00	250.667	72.5333	203.541	7.48	861.984	19.54	4.9
2019-01-07 09:15:00	197.467	129.4	160.343	7.26	861.936	21.04	7.40667
2019-01-07 09:30:00	336.6	164.133	273.319	6.74667	861.999	21.4467	10.0513
2019-01-07 09:45:00	531	195.467	431.443	7.7	862.015	20.8533	12.4633
2019-01-07 10:00:00	618.267	225.4	502.303	7.7	862.205	20.8467	14.4033
2019-01-07 10:15:00	670.733	264.8	545.015	8.21333	862.422	20.64	16.0987
2019-01-07 10:30:00	720.733	291.133	585.668	9.9	862.524	18.76	17.5267
2019-01-07 10:45:00	767	304.8	623.074	9.9	862.492	19.7933	18.8227
2019-01-07 11:00:00	813.333	302.867	660.697	9.9	862.508	16.6867	20.0293
2019-01-07 11:15:00	856.667	277.8	695.937	9.9	862.367	15.52	21.0973
2019-01-07 11:30:00	894.467	236.933	726.361	10.4867	862.228	15.3267	22.046
2019-01-07 11:45:00	927.733	197.133	753.428	11	861.991	14.9867	22.722
2019-01-07 12:00:00	965.8	161.267	784.338	11	861.693	14.34	23.468
2019-01-07 12:15:00	994.4	128.733	807.399	11.2933	861.358	13.6267	23.896
2019-01-07 12:30:00	1027.2	102.6	834.141	12.1	860.872	10.88	24.5867
2019-01-07 12:45:00	1045.47	79.6	849.081	12.1	860.582	10.3133	25.1453
2019-01-07 13:00:00	1053.67	64.6	855.685	12.4667	860.162	10.24	25.3733
2019-01-07 13:15:00	1057.8	55.2	858.988	13.2	859.763	9.46667	25.5247
2019-01-07 13:30:00	1059.8	48.6	860.611	13.2	859.402	9.02	25.6033
2019-01-07 13:45:00	1051.93	44.8667	854.17	13.5667	858.883	8.78667	25.536
2019-01-07 14:00:00	1036.6	42.2667	841.609	14.3	858.637	8.72667	25.3673
2019-01-07 14:15:00	1009.93	39.8667	819.633	14.3	858.345	8.78	25.0233
2019-01-07 14:30:00	970.133	38.2667	787.207	14.3	857.977	8.28667	24.4013
2019-01-07 14:45:00	930.733	38.0667	755.377	14.74	857.656	8.46	23.918
2019-01-07 15:00:00	894.733	37.5333	725.874	15.4	857.354	8.42667	23.2947
2019-01-07 15:15:00	858.2	37.7333	696.371	15.4	857.05	8.16667	22.6407
2019-01-07 15:30:00	820.467	37.4	665.733	15.4	856.736	8.26	21.978
2019-01-07 15:45:00	776.467	37.1333	630.274	15.4	856.629	8.58667	21.0787
2019-01-07 16:00:00	733.8	37.4	595.629	15.4	856.428	8.74	20.148
2019-01-07 16:15:00	690.8	35.8	560.442	15.4	856.395	9.04	18.9713
2019-01-07 16:30:00	647.6	34.7333	525.093	15.4	856.395	9.32667	17.67
2019-01-07 16:45:00	599.733	33.5333	486.713	15.4467	856.465	9.70667	16.224
2019-01-07 17:00:00	545.333	32	442.486	15.5467	856.559	10.4133	14.514
2019-01-07 17:15:00	484.067	31	393.061	15.58	856.607	11.1933	12.6213
2019-01-07 17:30:00	409.667	28.6667	332.649	15.3667	856.545	11.6533	10.3693
2019-01-07 17:45:00	326.533	25.4667	265.144	15.1067	856.607	12.0667	7.796
2019-01-07 18:00:00	239.267	21	194.284	14.9	856.737	12.4067	5.22333
2019-01-07 18:15:00	148.533	14.4	120.609	14.4067	856.915	13.3467	2.80267
2019-01-07 18:30:00	47.6	5.26667	38.652	13.66	857.15	14.2133	0.756
2019-01-07 18:45:00	0.4	0	0.324667	12.74	857.471	15.2067	0
2019-01-07 19:00:00	0	0	0	12.3133	857.68	16.0533	0
2019-01-07 19:15:00	0	0	0	11.4933	858.123	20.6533	0
2019-01-07 19:30:00	0	0	0	10.98	858.289	23.2	0
2019-01-07 19:45:00	0	0	0	10.5267	858.415	26.26	0
2019-01-07 20:00:00	0	0	0	10.6867	858.539	24.7867	0
2019-01-07 20:15:00	0	0	0	10.9867	858.59	20.7067	0
2019-01-07 20:30:00	0	0	0	11.18	858.772	19.28	0
2019-01-07 20:45:00	0	0	0	11.38	858.796	19.2267	0
2019-01-07 21:00:00	0	0	0	11.5067	858.875	19.36	0
2019-01-07 21:15:00	0	0	0	11.54	859.059	19.8733	0
2019-01-07 21:30:00	0	0	0	11.3733	859.036	20.4533	0
2019-01-07 21:45:00	0	0	0	11.62	859.131	19.7867	0
2019-01-07 22:00:00	0	0	0	11.6733	859.184	19.7733	0
2019-01-07 22:15:00	0	0	0	11.5867	859.098	19.8133	0
2019-01-07 22:30:00	0	0	0	11.4733	858.976	19.8533	0
2019-01-07 22:45:00	0	0	0	11.0667	859.076	20.8067	0
2019-01-07 23:00:00	0	0	0	9.77333	859.401	23.3267	0
2019-01-07 23:15:00	0	0	0	9.74667	859.583	23.3533	0
2019-01-07 23:30:00	0	0	0	9.92667	859.507	22.8267	0
2019-01-07 23:45:00	0	0	0	9.51333	859.258	23.7067	0
2019-01-08	0	0	0	10.1133	859.349	22.54	0
2019-01-08 00:15:00	0	0	0	9.53333	859.349	24.7333	0
2019-01-08 00:30:00	0	0	0	9.47333	859.106	24.9133	0
2019-01-08 00:45:00	0	0	0	10	859.083	23.5067	0
2019-01-08 01:00:00	0	0	0	9.85333	859.099	23.7	0
2019-01-08 01:15:00	0	0	0	9.18	858.913	25.1733	0
2019-01-08 01:30:00	0	0	0	7.98667	858.905	27.9267	0
2019-01-08 01:45:00	0	0	0	7.73333	859.13	28.4467	0
2019-01-08 02:00:00	0	0	0	7.92667	858.935	27.9467	0
2019-01-08 02:15:00	0	0	0	8.33333	858.544	26.6667	0
2019-01-08 02:30:00	0	0	0	8.47333	858.516	26.14	0
2019-01-08 02:45:00	0	0	0	8.42667	858.368	26.9467	0
2019-01-08 03:00:00	0	0	0	8.56	858.214	27.3533	0
2019-01-08 03:15:00	0	0	0	8.91333	858.01	26.9	0
2019-01-08 03:30:00	0	0	0	9.02	857.81	26.7333	0
2019-01-08 03:45:00	0	0	0	8.96	857.519	27.1067	0
2019-01-08 04:00:00	0	0	0	8.61333	857.463	27.86	0
2019-01-08 04:15:00	0	0	0	7.28	857.519	30.7867	0
2019-01-08 04:30:00	0	0	0	5.48	857.549	36.3533	0
2019-01-08 04:45:00	0	0	0	5.28667	857.448	36.6733	0
2019-01-08 05:00:00	0	0	0	6.22	857.385	33.92	0
2019-01-08 05:15:00	0	0	0	5.64	857.588	36	0
2019-01-08 05:30:00	0	0	0	5.79333	857.55	35.5267	0
2019-01-08 05:45:00	0	0	0	5.55333	857.559	36.6667	0
2019-01-08 06:00:00	0	0	0	5.98	857.503	34.8133	0
2019-01-08 06:15:00	0	0	0	6.08667	857.488	35.2467	0
2019-01-08 06:30:00	0	0	0	5.79333	857.687	36.76	0
2019-01-08 06:45:00	0	0	0	7.14	857.756	32.8933	0
2019-01-08 07:00:00	0	0	0	5.21333	857.834	39.1	0
2019-01-08 07:15:00	0	0	0	3.4	857.925	45.9333	0
2019-01-08 07:30:00	0	0	0	4.69333	857.956	41.1467	0
2019-01-08 07:45:00	0	0	0	6.34667	857.741	37.1467	0
2019-01-08 08:00:00	0	0	0	7.37333	857.795	37.66	0
2019-01-08 08:15:00	1.86667	2.33333	1.51533	7.54667	857.895	40.5333	0
2019-01-08 08:30:00	15.5333	14.9333	12.6133	7.60667	857.964	42.9467	0.33
2019-01-08 08:45:00	41.2	36.2	33.454	6.82667	858.129	44.4067	1.11867
2019-01-08 09:00:00	56.2667	45.4667	45.6893	3.29333	858.289	51.1	1.54
2019-01-08 09:15:00	76.7333	63	62.3073	2.82	858.583	53.0133	2.25867
2019-01-08 09:30:00	81.8667	70.8	66.4747	3.56	858.757	49.8133	2.54133
2019-01-08 09:45:00	89.0667	77.5333	72.322	5.42667	858.782	44.3	2.82467
2019-01-08 10:00:00	70	65.2	56.8393	6.93333	859.007	42.56	2.30333
2019-01-08 10:15:00	73.1333	68	59.382	7.55333	859.229	47.1933	2.38
2019-01-08 10:30:00	98.7333	91.0667	80.1707	7.84667	859.25	47.9467	3.20867
2019-01-08 10:45:00	117.333	104.533	95.276	8.15333	859.191	48.2133	3.82667
2019-01-08 11:00:00	125.933	112.8	102.258	7.59333	859.13	42.08	4.09667
2019-01-08 11:15:00	144.733	130.2	117.523	7.1	859.006	43.7733	4.664
2019-01-08 11:30:00	165.733	151.067	134.575	8.17333	858.82	53.5667	5.40733
2019-01-08 11:45:00	180.933	160.133	146.919	8.68667	858.429	48.54	5.9
2019-01-08 12:00:00	152.933	136.733	124.182	8.54	858.291	51.7267	4.97733
2019-01-08 12:15:00	177.4	152.4	144.049	8.39333	857.848	52.86	5.68
2019-01-08 12:30:00	159.867	144.8	129.811	8.18	857.727	55.4133	5.27333
2019-01-08 12:45:00	191.667	173.4	155.633	8.77333	857.611	47.2867	6.338
2019-01-08 13:00:00	207.4	184.467	168.409	8.95333	856.859	48.4333	6.77267
2019-01-08 13:15:00	227.667	201.733	184.864	9.2	856.814	41.44	7.44467
2019-01-08 13:30:00	254.4	213.133	206.573	9.22	856.421	39.54	8.09533
2019-01-08 13:45:00	274.133	220.8	222.597	9.30667	856.167	39.9	8.662
2019-01-08 14:00:00	226.4	194.867	183.836	9.50667	855.685	39.42	7.21733
2019-01-08 14:15:00	184.733	162.2	150.003	9.25333	855.686	40.66	6.03133
2019-01-08 14:30:00	157.8	139.333	128.134	9.18667	855.273	40.6533	5.148
2019-01-08 14:45:00	179.267	158.267	145.565	9.28667	855.049	40.16	5.81133
2019-01-08 15:00:00	192.667	168.267	156.446	9.28	854.886	39.2867	6.27733
2019-01-08 15:15:00	191.333	164.2	155.362	9.22	854.565	39.66	6.05533
2019-01-08 15:30:00	203.333	173.667	165.107	9.31333	854.336	39.2333	6.52733
2019-01-08 15:45:00	183.133	158.067	148.705	9.26	854.204	38.78	5.84333
2019-01-08 16:00:00	153.6	134.4	124.724	9.26667	854.274	38.3067	4.972
2019-01-08 16:15:00	119.067	105.2	96.6827	9.22667	854.375	37.8	3.80267
2019-01-08 16:30:00	108.667	98	88.236	9.26	854.404	38.4267	3.464
2019-01-08 16:45:00	99.2	89	80.55	9.14667	854.479	38.6133	3.19067
2019-01-08 17:00:00	76.6667	68.3333	62.2533	9.06667	854.421	38.4067	2.41133
2019-01-08 17:15:00	60.4	54.5333	49.0447	8.92	854.509	38.7467	1.84867
2019-01-08 17:30:00	52.1333	47.8	42.3313	8.85333	854.627	37.96	1.622
2019-01-08 17:45:00	34.0667	31.7333	27.6633	8.78667	854.789	37.5	1.03733
2019-01-08 18:00:00	24.8667	22.9333	20.1933	8.42	854.759	43.6333	0.764
2019-01-08 18:15:00	9.13333	7.6	7.416	7.79333	854.991	50.6733	0.141333
2019-01-08 18:30:00	1.86667	1.86667	1.516	7.46	855.117	52.4133	0
2019-01-08 18:45:00	0	0	0	7.04	855.272	56.34	0
2019-01-08 19:00:00	0	0	0	6.75333	855.365	59.1467	0
2019-01-08 19:15:00	0	0	0	6.66667	855.702	59.94	0
2019-01-08 19:30:00	0	0	0	6.46667	855.654	61.6133	0
2019-01-08 19:45:00	0	0	0	6.39333	856.053	62.1	0
2019-01-08 20:00:00	0	0	0	6.36	856.006	62.6333	0
2019-01-08 20:15:00	0	0	0	6.32667	855.77	62.7133	0
2019-01-08 20:30:00	0	0	0	6.37333	856.194	62.4667	0
2019-01-08 20:45:00	0	0	0	6.19333	856.283	63.9867	0
2019-01-08 21:00:00	0	0	0	6.14667	856.075	64.4533	0
2019-01-08 21:15:00	0	0	0	6.17333	856.336	63.6933	0
2019-01-08 21:30:00	0	0	0	6.16667	856.605	64.36	0
2019-01-08 21:45:00	0	0	0	6.06667	856.583	65.2067	0
2019-01-08 22:00:00	0	0	0	6.04667	856.442	65.5333	0
2019-01-08 22:15:00	0	0	0	6.16	856.521	64.3933	0
2019-01-08 22:30:00	0	0	0	5.72	856.729	63.8933	0
2019-01-08 22:45:00	0	0	0	5.52	856.829	64.1933	0
2019-01-08 23:00:00	0	0	0	5.54667	857.019	64.02	0
2019-01-08 23:15:00	0	0	0	5.3	857.255	65.4067	0
2019-01-08 23:30:00	0	0	0	5.49333	856.851	66.6933	0
2019-01-08 23:45:00	0	0	0	5.55333	857.059	67.2133	0
2019-01-09	0	0	0	5.48	856.899	67.72	0
2019-01-09 00:15:00	0	0	0	5.36	856.89	68.38	0
2019-01-09 00:30:00	0	0	0	5.44667	856.966	68.3933	0
2019-01-09 00:45:00	0	0	0	5.31333	856.798	69.8133	0
2019-01-09 01:00:00	0	0	0	5.03333	856.729	71.1267	0
2019-01-09 01:15:00	0	0	0	4.76	856.714	70.9333	0
2019-01-09 01:30:00	0	0	0	4.34667	856.621	70.12	0
2019-01-09 01:45:00	0	0	0	4.24667	856.614	69.88	0
2019-01-09 02:00:00	0	0	0	4.35333	856.683	70.1133	0
2019-01-09 02:15:00	0	0	0	3.36	856.568	71.2733	0
2019-01-09 02:30:00	0	0	0	4.02	856.645	67.38	0
2019-01-09 02:45:00	0	0	0	5.12	856.623	59.98	0
2019-01-09 03:00:00	0	0	0	4.85333	856.544	60.5733	0
2019-01-09 03:15:00	0	0	0	4.76	856.528	60.9867	0
2019-01-09 03:30:00	0	0	0	4.33333	856.505	63.9533	0
2019-01-09 03:45:00	0	0	0	4.64	856.607	62.26	0
2019-01-09 04:00:00	0	0	0	4.58	856.46	61.1933	0
2019-01-09 04:15:00	0	0	0	4.40667	856.283	61.14	0
2019-01-09 04:30:00	0	0	0	4.53333	856.261	59.24	0
2019-01-09 04:45:00	0	0	0	3.70667	856.313	63.9933	0
2019-01-09 05:00:00	0	0	0	2.26667	856.69	73.4867	0
2019-01-09 05:15:00	0	0	0	1.92667	856.706	77.8467	0
2019-01-09 05:30:00	0	0	0	2.72667	856.72	71.2667	0
2019-01-09 05:45:00	0	0	0	3.76667	856.668	63.3267	0
2019-01-09 06:00:00	0	0	0	4.01333	856.6	59.3933	0
2019-01-09 06:15:00	0	0	0	4.06667	856.607	58.8467	0
2019-01-09 06:30:00	0	0	0	3.84	856.737	60.18	0
2019-01-09 06:45:00	0	0	0	3.46667	856.866	62.8467	0
2019-01-09 07:00:00	0	0	0	2.62	857.113	67.18	0
2019-01-09 07:15:00	0	0	0	2.01333	857.34	70.4933	0
2019-01-09 07:30:00	0	0	0	2.20667	857.519	69.4933	0
2019-01-09 07:45:00	0	0	0	2.16	857.634	69.7667	0
2019-01-09 08:00:00	0	0	0	2.60667	857.78	66.0467	0
2019-01-09 08:15:00	0.4	0.533333	0.324	3.17333	858.071	62.48	0
2019-01-09 08:30:00	11.4	7.33333	9.258	3.29333	858.182	62.1733	0.202
2019-01-09 08:45:00	25.4	16.9333	20.6253	1.79333	858.485	67.74	0.660667
2019-01-09 09:00:00	108	39.2667	87.6953	0.64	858.695	72.7533	2.59733
2019-01-09 09:15:00	222.6	111.533	180.75	2.16667	858.645	70.0467	6.84533
2019-01-09 09:30:00	330.267	147.333	268.176	4.18667	858.462	62.7933	9.788
2019-01-09 09:45:00	501.467	180.8	407.191	4.76667	858.781	59.6533	12.0807
2019-01-09 10:00:00	592	200.133	480.703	5.20667	858.923	58.3467	14.2153
2019-01-09 10:15:00	676.4	258.533	549.238	5.7	859.075	55.9	16.65
2019-01-09 10:30:00	641.533	246.4	520.925	5.73333	859.19	54.8	16.486
2019-01-09 10:45:00	780.933	276.2	634.118	6.22	859.295	52.7733	19.4027
2019-01-09 11:00:00	788.067	241.867	639.911	6.6	859.251	51.0867	19.9467
2019-01-09 11:15:00	824.533	207.933	669.521	6.8	859.174	49.9067	21.0107
2019-01-09 11:30:00	857.2	171	696.047	7.03333	859.015	49.4	21.6833
2019-01-09 11:45:00	900.467	146.6	731.18	7.32	858.79	47.4867	22.596
2019-01-09 12:00:00	640.267	107.2	519.897	7.48	858.408	44.2	16.0327
2019-01-09 12:15:00	531.067	88.9333	431.225	7.37333	858.274	43.0933	16.1793
2019-01-09 12:30:00	1006.13	120.667	816.98	8.2	858.016	39.6533	23.128
2019-01-09 12:45:00	590.4	103.067	479.403	8.29333	857.671	39.2067	18.624
2019-01-09 13:00:00	1072.53	97.1333	870.897	8.71333	857.294	37.82	26.7287
2019-01-09 13:15:00	1053.87	65.8667	855.74	9.15333	856.86	36.4733	25.9393
2019-01-09 13:30:00	1024.13	64.4667	831.595	9.32667	856.52	35.4867	25.2153
2019-01-09 13:45:00	980.733	82.8667	796.356	9.74667	856.038	32.72	24.5167
2019-01-09 14:00:00	936.6	88.6	760.519	10.1133	855.638	31.4533	24.0167
2019-01-09 14:15:00	848.467	94.8	688.955	10.0133	855.369	31.4067	21.522
2019-01-09 14:30:00	780.533	83.1333	633.794	10.5267	854.993	30.0133	21.7767
2019-01-09 14:45:00	677	66.0667	549.724	10.3333	854.649	28.4867	18.9293
2019-01-09 15:00:00	829.8	61.1333	673.797	10.8067	854.373	26.6933	21.8487
2019-01-09 15:15:00	749.267	55.4667	608.405	11.3267	854.051	24.9933	20.892
2019-01-09 15:30:00	836.333	70.3333	679.104	11.6133	853.824	23.8533	22.836
2019-01-09 15:45:00	781.4	57.7333	634.497	11.6667	853.737	25.06	21.39
2019-01-09 16:00:00	706.733	61	573.867	11.6667	853.752	26.0067	19.4193
2019-01-09 16:15:00	707.333	76.5333	574.355	11.9533	853.777	26.6533	19.412
2019-01-09 16:30:00	642.8	52.6	521.953	11.6733	853.872	28.1933	17.5227
2019-01-09 16:45:00	590.267	50.2667	479.296	11.54	854.059	30.5533	16.058
2019-01-09 17:00:00	534.6	42.5333	434.095	11.4533	854.213	29.88	14.308
2019-01-09 17:15:00	479.2	45.8667	389.111	11.4733	854.441	29.34	12.504
2019-01-09 17:30:00	395.533	38.3333	321.173	11.4	854.633	30.1467	10.0493
2019-01-09 17:45:00	312.6	31.2	253.831	10.9067	854.721	34.2333	7.55
2019-01-09 18:00:00	222.533	25.1333	180.697	10.7467	854.656	30.5733	4.90467
2019-01-09 18:15:00	136.933	16.5333	111.19	10.0133	854.749	38.24	2.696
2019-01-09 18:30:00	10.2667	2.33333	8.33667	8.38	854.991	47.66	0.063333
2019-01-09 18:45:00	0.066667	0	0.054	7.64667	855.164	50.6867	0
2019-01-09 19:00:00	0	0	0	7.46667	855.311	51.12	0
2019-01-09 19:15:00	0	0	0	7.33333	855.475	51.2067	0
2019-01-09 19:30:00	0	0	0	7.34667	855.593	51.4867	0
2019-01-09 19:45:00	0	0	0	7.24	855.823	51.2067	0
2019-01-09 20:00:00	0	0	0	7.29333	855.935	50.5133	0
2019-01-09 20:15:00	0	0	0	7.47333	856.14	48.9933	0
2019-01-09 20:30:00	0	0	0	7.10667	856.209	49.8333	0
2019-01-09 20:45:00	0	0	0	7.04	856.387	49.6133	0
2019-01-09 21:00:00	0	0	0	7.18667	856.512	48.8133	0
2019-01-09 21:15:00	0	0	0	7.08	856.512	48.6733	0
2019-01-09 21:30:00	0	0	0	7.03333	856.536	48.4667	0
2019-01-09 21:45:00	0	0	0	6.95333	856.615	47.6867	0
2019-01-09 22:00:00	0	0	0	6.7	856.677	46.8533	0
2019-01-09 22:15:00	0	0	0	6.66	856.806	44.5667	0
2019-01-09 22:30:00	0	0	0	6.06667	856.782	46.5133	0
2019-01-09 22:45:00	0	0	0	6.36667	856.736	45.62	0
2019-01-09 23:00:00	0	0	0	6.16	856.829	46.1133	0
2019-01-09 23:15:00	0	0	0	5.93333	856.891	46.6133	0
2019-01-09 23:30:00	0	0	0	5.86667	856.914	47.7733	0
2019-01-09 23:45:00	0	0	0	5.86667	856.967	47.62	0
2019-01-10	0	0	0	5.78	857.105	48.1667	0
2019-01-10 00:15:00	0	0	0	5.71333	857.068	48.44	0
2019-01-10 00:30:00	0	0	0	5.68667	857.021	48.4933	0
2019-01-10 00:45:00	0	0	0	5.6	857.029	48.6	0
2019-01-10 01:00:00	0	0	0	5.5	856.883	48.94	0
2019-01-10 01:15:00	0	0	0	5.41333	856.973	48.6267	0
2019-01-10 01:30:00	0	0	0	5.39333	857.043	49.3933	0
2019-01-10 01:45:00	0	0	0	5.1	856.982	50.5867	0
2019-01-10 02:00:00	0	0	0	5.10667	856.883	50.8933	0
2019-01-10 02:15:00	0	0	0	5.07333	856.75	51.32	0
2019-01-10 02:30:00	0	0	0	5	856.72	52.0733	0
2019-01-10 02:45:00	0	0	0	4.75333	856.798	53.7333	0
2019-01-10 03:00:00	0	0	0	4.62	856.798	54.7933	0
2019-01-10 03:15:00	0	0	0	4.52	856.799	55.32	0
2019-01-10 03:30:00	0	0	0	4.38667	856.862	56.9533	0
2019-01-10 03:45:00	0	0	0	4.46	856.883	57.24	0
2019-01-10 04:00:00	0	0	0	4.43333	856.907	57.1333	0
2019-01-10 04:15:00	0	0	0	3.92	856.922	60.04	0
2019-01-10 04:30:00	0	0	0	3.90667	856.898	60.2933	0
2019-01-10 04:45:00	0	0	0	4.19333	856.774	59.3133	0
2019-01-10 05:00:00	0	0	0	4.60667	856.661	57.4333	0
2019-01-10 05:15:00	0	0	0	4.48667	856.481	57.9067	0
2019-01-10 05:30:00	0	0	0	4.24	856.495	59.4067	0
2019-01-10 05:45:00	0	0	0	4.01333	856.381	61.48	0
2019-01-10 06:00:00	0	0	0	4.03333	856.327	61.4267	0
2019-01-10 06:15:00	0	0	0	4.04	856.441	61.34	0
2019-01-10 06:30:00	0	0	0	3.59333	856.607	62.8867	0
2019-01-10 06:45:00	0	0	0	2.63333	856.815	66.1333	0
2019-01-10 07:00:00	0	0	0	2.5	857.074	67.9	0
2019-01-10 07:15:00	0	0	0	2.24667	857.276	68.5333	0
2019-01-10 07:30:00	0	0	0	2.80667	857.329	67.44	0
2019-01-10 07:45:00	0	0	0	3.13333	857.455	65.3	0
2019-01-10 08:00:00	0	0	0	2.44667	857.696	67.5467	0
2019-01-10 08:15:00	0.2	0.6	0.162	2.04667	857.857	69.52	0
2019-01-10 08:30:00	3.46667	6	2.81467	2.95333	858.041	66.16	0
2019-01-10 08:45:00	12.6	11.2	10.232	2.78667	858.159	66.4	0.192
2019-01-10 09:00:00	23.5333	23.6	19.1087	2.65333	858.368	67.3133	0.642667
2019-01-10 09:15:00	30.2667	26.6	24.5773	3.04	858.561	65.4333	0.795333
2019-01-10 09:30:00	41.6	32.0667	33.7793	3.3	858.524	63.8467	1.09933
2019-01-10 09:45:00	62.6	44.4	50.8307	3.64667	858.649	61.98	1.754
2019-01-10 10:00:00	98.4667	80.9333	79.954	3.26667	858.86	64.6533	2.826
2019-01-10 10:15:00	83.5333	74.9333	67.828	4.04667	858.938	61.9667	2.56267
2019-01-10 10:30:00	100.067	82	81.2553	4.50667	858.945	58.5333	2.752
2019-01-10 10:45:00	678.4	241.067	550.861	5.32	858.922	55.96	17.5073
2019-01-10 11:00:00	811.4	233.733	658.857	5.96667	858.627	54.7533	20.4613
2019-01-10 11:15:00	625.4	195.267	507.824	6.40667	858.423	51.6467	16.0027
2019-01-10 11:30:00	477.533	173.667	387.759	6.01333	858.211	51.9867	13.8667
2019-01-10 11:45:00	395.333	191.867	321.011	6.24667	858.101	51.72	10.8473
2019-01-10 12:00:00	308.067	196.467	250.151	6.5	857.901	50.7	9.25333
2019-01-10 12:15:00	503.6	234.267	408.924	6.83333	857.689	49.7467	14.7253
2019-01-10 12:30:00	553.667	253.333	449.577	7.22	857.353	46.6733	15.6273
2019-01-10 12:45:00	670.933	249.8	544.799	7.5	856.989	43.7	18.1773
2019-01-10 13:00:00	920.2	198.467	747.203	7.64	856.775	43.68	22.6827
2019-01-10 13:15:00	229.8	149.467	186.597	7.22667	856.505	45.5867	6.02733
2019-01-10 13:30:00	582.267	240.333	472.801	6.86	856.35	49.82	15.506
2019-01-10 13:45:00	765.333	203.6	621.451	7.11333	856.029	48.1533	19.996
2019-01-10 14:00:00	1028.67	121.333	835.277	7.74	855.694	46.2867	25.1907
2019-01-10 14:15:00	408.2	168.8	331.459	7.66	855.423	44.7733	10.8727
2019-01-10 14:30:00	298.133	163.467	242.084	7.39333	855.227	46.08	7.796
2019-01-10 14:45:00	268.6	142.333	218.103	7.38	855.021	44.66	7.706
2019-01-10 15:00:00	281.4	150.067	228.496	7.62667	854.903	44.04	7.39133
2019-01-10 15:15:00	131.133	131.467	106.479	7.80667	854.664	42.6933	4.17267
2019-01-10 15:30:00	48.2	51.0667	39.1387	7.76667	854.664	42.5	1.458
2019-01-10 15:45:00	57.2	57.0667	46.4453	7.58	854.805	43.4333	1.77867
2019-01-10 16:00:00	92.8667	86.6667	75.4087	7.72667	854.947	43.3733	2.876
2019-01-10 16:15:00	68.4	68.2	55.5407	7.51333	854.866	45.5	2.02867
2019-01-10 16:30:00	39.0667	33.0667	31.722	7.68	854.835	41.4133	1.104
2019-01-10 16:45:00	48.7333	39.6667	39.5707	7.7	854.841	41.8667	1.35133
2019-01-10 17:00:00	52.8	29.4667	42.8733	7.48	854.903	43.4133	1.286
2019-01-10 17:15:00	69.6667	41.6	56.5693	7.88	854.947	40.4133	1.744
2019-01-10 17:30:00	128.067	40.4667	103.991	8.32	854.925	38.1867	3.79933
2019-01-10 17:45:00	125.333	34.8	101.77	8.68	854.955	36.38	3.24667
2019-01-10 18:00:00	48.1333	23.2	39.084	8.07333	855.031	38.5867	1.47467
2019-01-10 18:15:00	131.733	23.4	106.967	8.42	855.171	38.6933	2.63133
2019-01-10 18:30:00	62.4667	17.1333	50.7227	8.00667	855.415	39.9733	1.178
2019-01-10 18:45:00	3.13333	1.26667	2.544	7.33333	855.71	42.0733	0
2019-01-10 19:00:00	0	0	0	6.69333	855.935	45.1067	0
2019-01-10 19:15:00	0	0	0	6.46	856.229	46.08	0
2019-01-10 19:30:00	0	0	0	6.40667	856.403	45.1333	0
2019-01-10 19:45:00	0	0	0	6.27333	856.669	44.54	0
2019-01-10 20:00:00	0	0	0	6.04667	856.851	44.5533	0
2019-01-10 20:15:00	0	0	0	6.06	856.897	43.8933	0
2019-01-10 20:30:00	0	0	0	5.8	856.944	44.2467	0
2019-01-10 20:45:00	0	0	0	5.65333	856.875	44.3067	0
2019-01-10 21:00:00	0	0	0	5.7	856.853	44.4667	0
2019-01-10 21:15:00	0	0	0	5.61333	856.822	45.3867	0
2019-01-10 21:30:00	0	0	0	5.48	856.99	46.1467	0
2019-01-10 21:45:00	0	0	0	5.05333	857.255	47.7	0
2019-01-10 22:00:00	0	0	0	5.29333	857.256	46.9467	0
2019-01-10 22:15:00	0	0	0	5.28	857.534	47.0267	0
2019-01-10 22:30:00	0	0	0	5.41333	857.84	46.9867	0
2019-01-10 22:45:00	0	0	0	5.24667	857.894	48.4067	0
2019-01-10 23:00:00	0	0	0	5.07	858.074	49.85	0
2019-01-10 23:15:00	0	0	0	4.98	858.205	50.7333	0
2019-01-10 23:30:00	0	0	0	4.82667	858.153	51.3867	0
2019-01-10 23:45:00	0	0	0	4.72	858.32	51.4333	0
2019-01-11	0	0	0	4.59333	858.422	51.54	0
2019-01-11 00:15:00	0	0	0	4.54	858.621	51.1067	0
2019-01-11 00:30:00	0	0	0	4.50667	858.523	50.68	0
2019-01-11 00:45:00	0	0	0	4.52667	858.673	50.6667	0
2019-01-11 01:00:00	0	0	0	4.27333	858.757	51.9733	0
2019-01-11 01:15:00	0	0	0	4.09333	858.789	52.36	0
2019-01-11 01:30:00	0	0	0	3.88667	858.884	52.7067	0
2019-01-11 01:45:00	0	0	0	4.02667	858.882	51.94	0
2019-01-11 02:00:00	0	0	0	4.2	858.773	50.9467	0
2019-01-11 02:15:00	0	0	0	4.05333	859.03	51.1333	0
2019-01-11 02:30:00	0	0	0	4.10667	859.045	50.4333	0
2019-01-11 02:45:00	0	0	0	3.92	858.915	50.7467	0
2019-01-11 03:00:00	0	0	0	3.60667	858.773	51.7733	0
2019-01-11 03:15:00	0	0	0	3.55333	858.687	52.0067	0
2019-01-11 03:30:00	0	0	0	2.85333	858.836	54.3133	0
2019-01-11 03:45:00	0	0	0	2.51333	859.022	55.8333	0
2019-01-11 04:00:00	0	0	0	2.58	859.137	55.06	0
2019-01-11 04:15:00	0	0	0	2.60667	859.129	54.1467	0
2019-01-11 04:30:00	0	0	0	2.64667	858.96	53.4533	0
2019-01-11 04:45:00	0	0	0	2.8	858.962	51.8933	0
2019-01-11 05:00:00	0	0	0	2.66667	858.883	51.68	0
2019-01-11 05:15:00	0	0	0	2.56	858.82	51.54	0
2019-01-11 05:30:00	0	0	0	2.75333	858.671	50.3867	0
2019-01-11 05:45:00	0	0	0	2.30667	858.656	51.4333	0
2019-01-11 06:00:00	0	0	0	2.66667	858.78	49.8333	0
2019-01-11 06:15:00	0	0	0	2.6	858.86	49.44	0
2019-01-11 06:30:00	0	0	0	2.2	859.037	50.8867	0
2019-01-11 06:45:00	0	0	0	2.00667	859.341	51.12	0
2019-01-11 07:00:00	0	0	0	2.52	859.684	49.0267	0
2019-01-11 07:15:00	0	0	0	2.53333	859.887	48.6267	0
2019-01-11 07:30:00	0	0	0	2.28667	860.138	49.4867	0
2019-01-11 07:45:00	0	0	0	2.04667	860.355	50.5	0
2019-01-11 08:00:00	0	0	0	2.02	860.543	50.1467	0
2019-01-11 08:15:00	1.53333	0.4	1.24467	1.14	860.818	53.04	0
2019-01-11 08:30:00	10.0667	6.06667	8.174	1.06667	861.049	53.8	0.098667
2019-01-11 08:45:00	44.9333	19.5333	36.4867	0.246667	861.215	57.5867	1.87333
2019-01-11 09:00:00	187.6	58.6667	152.331	0.38	861.199	59.6133	4.60467
2019-01-11 09:15:00	234.267	99.3333	190.225	1.56667	861.034	56.32	7.13
2019-01-11 09:30:00	334.533	125.133	271.64	4.02	860.857	49.0267	9.676
2019-01-11 09:45:00	483.6	147.333	392.683	5.82	860.794	40.92	11.8607
2019-01-11 10:00:00	586.667	166.533	476.373	4.70667	860.963	44.64	14.0207
2019-01-11 10:15:00	651.933	193.2	529.371	4.02667	861.104	48.52	15.918
2019-01-11 10:30:00	701.933	198.667	569.971	4.16	861.297	50.22	17.4213
2019-01-11 10:45:00	744.6	190.067	604.615	4.55333	861.417	48.4133	18.6887
2019-01-11 11:00:00	783.467	168.933	636.174	5.07333	861.431	45.7733	19.7507
2019-01-11 11:15:00	836.533	141.867	679.265	5.42667	861.358	42.9333	21.1347
2019-01-11 11:30:00	878.067	113.6	712.99	5.99333	861.229	38.2667	22.1453
2019-01-11 11:45:00	918.267	93.2667	745.631	6.67333	861.049	34.2133	22.8627
2019-01-11 12:00:00	954.133	78.2667	774.755	6.93333	860.781	33.38	23.4733
2019-01-11 12:15:00	988.2	65.8667	802.417	7.28	860.566	31.3333	23.9633
2019-01-11 12:30:00	1015.47	57.6	824.558	7.67333	860.247	30.5333	24.3267
2019-01-11 12:45:00	1024.2	52.6	831.649	7.82	859.847	30.74	24.5733
2019-01-11 13:00:00	1035.93	48.6667	841.231	7.90667	859.507	29.7867	24.8567
2019-01-11 13:15:00	1036.33	48.9333	841.503	7.98	859.105	30.52	24.9327
2019-01-11 13:30:00	1037.27	47.8	842.26	8.68667	858.712	27.1933	24.894
2019-01-11 13:45:00	1025.2	50.1333	832.463	9.37333	858.415	24.9933	24.7473
2019-01-11 14:00:00	1007.47	49.9333	818.061	9.70667	858.062	24.6133	24.5667
2019-01-11 14:15:00	983.8	47.3333	798.847	10.0733	857.732	23.0467	24.252
2019-01-11 14:30:00	949.667	44.6	771.129	11.0467	857.333	20.3733	23.8093
2019-01-11 14:45:00	915.667	43.2	743.521	11.48	856.959	19.2	23.4247
2019-01-11 15:00:00	887.067	42.0667	720.297	11.38	856.737	17.3733	23.112
2019-01-11 15:15:00	839.4	42.5333	681.593	11.5733	856.527	16.72	22.082
2019-01-11 15:30:00	793.667	44.8	644.456	11.8467	856.381	22.0067	21.368
2019-01-11 15:45:00	759.267	44.8667	616.525	11.52	856.231	25.3667	20.9187
2019-01-11 16:00:00	717	44	582.204	11.2733	856.206	27.08	20.044
2019-01-11 16:15:00	680.333	43.8	552.431	10.7267	856.187	28.3	19.0553
2019-01-11 16:30:00	634.067	42.6667	514.863	10.7133	856.177	28.3267	17.8413
2019-01-11 16:45:00	589.133	42.2	478.376	10.5	856.177	29.7733	16.3907
2019-01-11 17:00:00	535.933	40	435.179	10.26	856.283	31.0267	14.758
2019-01-11 17:15:00	480.333	38.6	390.031	9.98	856.349	31.9467	12.9607
2019-01-11 17:30:00	404.133	34.7333	328.155	10.1133	856.466	31.92	10.672
2019-01-11 17:45:00	324.133	31.7333	263.198	9.67333	856.466	33.0267	8.12067
2019-01-11 18:00:00	244.333	26.3333	198.399	9.3	856.582	33.8667	5.59333
2019-01-11 18:15:00	161	19.2	130.73	9.04667	856.706	34.0067	3.22467
2019-01-11 18:30:00	64.2667	8.86667	52.1847	8.71333	856.967	34.4067	1.11333
2019-01-11 18:45:00	1.26667	0.2	1.028	7.86	857.235	36.7867	0
2019-01-11 19:00:00	0	0	0	7.48667	857.564	38.46	0
2019-01-11 19:15:00	0	0	0	7.24	857.743	38.9667	0
2019-01-11 19:30:00	0	0	0	7.22667	857.863	37.62	0
2019-01-11 19:45:00	0	0	0	7.37333	858.055	35.8333	0
2019-01-11 20:00:00	0	0	0	7.26667	858.205	36.4733	0
2019-01-11 20:15:00	0	0	0	7.08	858.432	37.06	0
2019-01-11 20:30:00	0	0	0	6.88667	858.471	37.3667	0
2019-01-11 20:45:00	0	0	0	6.78667	858.561	37.1	0
2019-01-11 21:00:00	0	0	0	6.8	858.486	36.36	0
2019-01-11 21:15:00	0	0	0	6.71333	858.583	35.9667	0
2019-01-11 21:30:00	0	0	0	6.66667	858.531	35.52	0
2019-01-11 21:45:00	0	0	0	6.37333	858.523	35.8267	0
2019-01-11 22:00:00	0	0	0	6.24667	858.493	35.58	0
2019-01-11 22:15:00	0	0	0	5.67333	858.575	36.76	0
2019-01-11 22:30:00	0	0	0	5.67333	858.656	36.6667	0
2019-01-11 22:45:00	0	0	0	5.68	858.68	36.5333	0
2019-01-11 23:00:00	0	0	0	5.62	858.627	36.54	0
2019-01-11 23:15:00	0	0	0	5.49333	858.717	36.82	0
2019-01-11 23:30:00	0	0	0	5.4	858.788	38.4067	0
2019-01-11 23:45:00	0	0	0	5.58667	858.876	39.4133	0
2019-01-12	0	0	0	5.45333	858.876	39.4133	0
2019-01-12 00:15:00	0	0	0	5.16	858.867	39.97	0
2019-01-12 00:30:00	0	0	0	4.04	858.702	43.34	0
2019-01-12 00:45:00	0	0	0	4.34	858.612	42.9867	0
2019-01-12 01:00:00	0	0	0	4.53333	858.597	42.62	0
2019-01-12 01:15:00	0	0	0	4.74667	858.612	41.84	0
2019-01-12 01:30:00	0	0	0	4.76	858.515	41.9	0
2019-01-12 01:45:00	0	0	0	5.06667	858.259	40.5267	0
2019-01-12 02:00:00	0	0	0	5.21333	858.13	39.4	0
2019-01-12 02:15:00	0	0	0	5.38	857.995	38.4667	0
2019-01-12 02:30:00	0	0	0	5.51333	857.948	37.26	0
2019-01-12 02:45:00	0	0	0	5.55333	857.963	36.7533	0
2019-01-12 03:00:00	0	0	0	5.61333	857.963	36.26	0
2019-01-12 03:15:00	0	0	0	5.28	857.972	37.32	0
2019-01-12 03:30:00	0	0	0	5.41333	857.849	36.5067	0
2019-01-12 03:45:00	0	0	0	5.17333	857.841	37.0333	0
2019-01-12 04:00:00	0	0	0	4.78667	857.878	38.5067	0
2019-01-12 04:15:00	0	0	0	4.59333	857.848	39	0
2019-01-12 04:30:00	0	0	0	3.71	857.96	41.58	0
2019-01-12 04:45:00	0	0	0	3.66	857.886	41.66	0
2019-01-12 05:00:00	0	0	0	4.14	857.833	40	0
2019-01-12 05:15:00	0	0	0	4.23333	857.856	39.6333	0
2019-01-12 05:30:00	0	0	0	4.26	857.885	39.4333	0
2019-01-12 05:45:00	0	0	0	4.14	857.796	39.8267	0
2019-01-12 06:00:00	0	0	0	3.08	857.964	43.1867	0
2019-01-12 06:15:00	0	0	0	2.62	858.086	45.54	0
2019-01-12 06:30:00	0	0	0	3.12	858.214	43.9733	0
2019-01-12 06:45:00	0	0	0	2.62	858.336	45.7467	0
2019-01-12 07:00:00	0	0	0	2.74	858.392	45.5067	0
2019-01-12 07:15:00	0	0	0	2.90667	858.567	44.8467	0
2019-01-12 07:30:00	0	0	0	3.24	858.695	43.2	0
2019-01-12 07:45:00	0	0	0	3.44667	858.938	42.0933	0
2019-01-12 08:00:00	0	0	0	3.62667	859.052	41.22	0
2019-01-12 08:15:00	0.933333	0.733333	0.757333	3.30667	859.302	41.9933	0
2019-01-12 08:30:00	8.86667	5.86667	7.19933	3.26667	859.623	42.0067	0.037333
2019-01-12 08:45:00	65.5	10.8	53.187	1.24	859.926	50.15	1.217
2019-01-12 09:00:00	175.467	54.9333	142.479	2.52667	860.105	47.56	4.642
2019-01-12 09:15:00	241.467	91.6667	196.07	3.52667	860.113	44.8133	7.176
2019-01-12 09:30:00	345.867	115.267	280.843	5.27333	859.918	40.3333	9.77933
2019-01-12 09:45:00	513.067	137.667	416.61	4.52667	859.857	42.3	12.1827
2019-01-12 10:00:00	594.4	149.867	482.653	5.39333	859.963	39.62	14.1053
2019-01-12 10:15:00	645.333	167.4	524.01	6.87333	860.074	35.48	15.7633
2019-01-12 10:30:00	702.133	169.6	570.131	6.76	860.067	36.1733	17.3167
2019-01-12 10:45:00	751.067	157.6	609.866	7.4	860.059	34.0467	18.6447
2019-01-12 11:00:00	801.067	137.2	650.466	7.84	859.969	31.66	19.868
2019-01-12 11:15:00	843.6	110.267	685.004	8.48667	859.925	30.0267	20.9413
2019-01-12 11:30:00	889.467	88.9333	722.247	8.23333	859.804	26.3733	21.9793
2019-01-12 11:45:00	934.333	75.8667	758.679	7.86667	859.476	24.7333	22.902
2019-01-12 12:00:00	968.2	64.7333	786.179	8.54667	859.221	22.12	23.5767
2019-01-12 12:15:00	1004.2	56.2667	815.409	8.94	858.967	20.1333	24.276
2019-01-12 12:30:00	1018.2	51.5333	826.778	9.38667	858.765	19.8467	24.4207
2019-01-12 12:45:00	1037.07	46.4667	842.097	10.0533	858.293	17.6067	24.788
2019-01-12 13:00:00	1051.53	45.1333	853.845	10.66	857.764	14.92	25.4153
2019-01-12 13:15:00	1066	43.2667	865.593	11.14	857.301	12.9733	25.826
2019-01-12 13:30:00	1066.07	40.9333	865.647	11.3267	856.99	12.98	25.7513
2019-01-12 13:45:00	1062.27	40.8667	862.56	11.6	856.629	12.1333	25.69
2019-01-12 14:00:00	1043.8	39.9333	847.565	12.1467	856.244	12.58	25.272
2019-01-12 14:15:00	1021.87	40.4	829.756	12.6667	855.746	11.0467	25.1693
2019-01-12 14:30:00	992.267	40.8	805.72	13.3133	855.201	8.92667	25.1253
2019-01-12 14:45:00	951.533	40.2	772.645	13.7133	854.993	8.65333	24.6867
2019-01-12 15:00:00	911.533	40.5333	740.165	13.88	854.84	8.7	24.04
2019-01-12 15:15:00	874.4	40.8	710.012	13.92	854.595	9.52	23.312
2019-01-12 15:30:00	835.267	39.8667	678.236	14.46	854.496	8.68667	22.472
2019-01-12 15:45:00	791.867	39.3333	642.997	14.5533	854.511	8.51333	21.5913
2019-01-12 16:00:00	745.2	39	605.102	14.8067	854.457	8.39333	20.5133
2019-01-12 16:15:00	706.333	38.2667	573.543	14.5533	854.442	8.4	19.424
2019-01-12 16:30:00	664.733	37.4	539.763	14.56	854.588	8.45333	18.2293
2019-01-12 16:45:00	619.2	35.7333	502.789	14.58	854.627	8.38667	16.8353
2019-01-12 17:00:00	568.6	34.4	461.704	14.4733	854.688	8.45333	15.254
2019-01-12 17:15:00	509.133	32.5333	413.417	14.5533	854.827	8.58667	13.4053
2019-01-12 17:30:00	438.333	30.2	355.926	14.2667	854.939	8.67333	11.286
2019-01-12 17:45:00	354.933	26.9333	288.207	14.1267	855.053	8.50667	8.75533
2019-01-12 18:00:00	270.133	22.6667	219.348	13.8867	855.219	9.01333	6.11667
2019-01-12 18:15:00	180.067	16.5333	146.213	13.5933	855.431	9.92667	3.59
2019-01-12 18:30:00	82.8667	8.46667	67.288	13.0267	855.747	10.2067	1.45467
2019-01-12 18:45:00	1.46667	0.066667	1.19067	12.0733	855.951	11.08	0
2019-01-12 19:00:00	0	0	0	11.38	856.246	12.1533	0
2019-01-12 19:15:00	0	0	0	11.3467	856.387	11.7533	0
2019-01-12 19:30:00	0	0	0	11.22	856.653	11.92	0
2019-01-12 19:45:00	0	0	0	10.94	856.845	13.0333	0
2019-01-12 20:00:00	0	0	0	11.2867	856.982	11.8867	0
2019-01-12 20:15:00	0	0	0	11.0933	857.127	12.1333	0
2019-01-12 20:30:00	0	0	0	11.12	857.224	11.6867	0
2019-01-12 20:45:00	0	0	0	10.8667	857.392	12.2	0
2019-01-12 21:00:00	0	0	0	10.7067	857.603	12.7267	0
2019-01-12 21:15:00	0	0	0	10.58	857.672	13.12	0
2019-01-12 21:30:00	0	0	0	10.4467	857.626	13.66	0
2019-01-12 21:45:00	0	0	0	10.5667	857.549	13.4733	0
2019-01-12 22:00:00	0	0	0	10.42	857.626	13.3067	0
2019-01-12 22:15:00	0	0	0	10.34	857.725	13.3733	0
2019-01-12 22:30:00	0	0	0	10.06	857.756	13.7667	0
2019-01-12 22:45:00	0	0	0	10.1933	857.856	13.5267	0
2019-01-12 23:00:00	0	0	0	10.0333	857.832	13.82	0
2019-01-12 23:15:00	0	0	0	9.86	857.895	14.4933	0
2019-01-12 23:30:00	0	0	0	9.36667	858.063	15.5067	0
2019-01-12 23:45:00	0	0	0	9.04667	858.203	16.2867	0
2019-01-13	0	0	0	9.05333	858.213	16.6533	0
2019-01-13 00:15:00	0	0	0	8.76	858.312	17.4667	0
2019-01-13 00:30:00	0	0	0	7.53333	858.337	19.2867	0
2019-01-13 00:45:00	0	0	0	6.1	858.447	22.18	0
2019-01-13 01:00:00	0	0	0	6.19333	858.545	22.46	0
2019-01-13 01:15:00	0	0	0	5.91333	858.605	23.3533	0
2019-01-13 01:30:00	0	0	0	6.53333	858.501	22.2133	0
2019-01-13 01:45:00	0	0	0	6.30667	858.509	22.4467	0
2019-01-13 02:00:00	0	0	0	6.09333	858.479	23.1733	0
2019-01-13 02:15:00	0	0	0	5.56	858.423	24.9733	0
2019-01-13 02:30:00	0	0	0	5.28667	858.531	24.9533	0
2019-01-13 02:45:00	0	0	0	5.31333	858.524	24.22	0
2019-01-13 03:00:00	0	0	0	5.12	858.575	25.1133	0
2019-01-13 03:15:00	0	0	0	4.88	858.583	26.08	0
2019-01-13 03:30:00	0	0	0	4.78	858.502	26.2533	0
2019-01-13 03:45:00	0	0	0	5.27333	858.431	25.76	0
2019-01-13 04:00:00	0	0	0	4.63333	858.408	26.7733	0
2019-01-13 04:15:00	0	0	0	4.36	858.289	26.7133	0
2019-01-13 04:30:00	0	0	0	4.64	858.273	26.22	0
2019-01-13 04:45:00	0	0	0	4.82	858.272	26.32	0
2019-01-13 05:00:00	0	0	0	4.06	858.235	28.34	0
2019-01-13 05:15:00	0	0	0	3.51333	858.189	28.7133	0
2019-01-13 05:30:00	0	0	0	3.51333	858.115	28.2467	0
2019-01-13 05:45:00	0	0	0	3.53333	858.123	28.58	0
2019-01-13 06:00:00	0	0	0	3.82667	858.159	29.32	0
2019-01-13 06:15:00	0	0	0	3.96	858.093	30.5933	0
2019-01-13 06:30:00	0	0	0	3.76	858.242	31.7733	0
2019-01-13 06:45:00	0	0	0	2.72	858.456	33.2133	0
2019-01-13 07:00:00	0	0	0	1.76	858.509	35.12	0
2019-01-13 07:15:00	0	0	0	2.06667	858.71	33.6133	0
2019-01-13 07:30:00	0	0	0	2.4	858.804	32.8933	0
2019-01-13 07:45:00	0	0	0	2.25333	858.929	33.3267	0
2019-01-13 08:00:00	0	0	0	1.76667	859.181	34.5667	0
2019-01-13 08:15:00	0.866667	0.2	0.703333	1.39333	859.407	36.0333	0
2019-01-13 08:30:00	7.73333	4.8	6.27933	1.12	859.6	37.04	0.037333
2019-01-13 08:45:00	62.0667	16.4667	50.3993	1.19333	859.834	37.6133	1.88933
2019-01-13 09:00:00	162.8	50.9333	132.193	3.23333	859.795	32.58	4.77933
2019-01-13 09:15:00	251.467	81.9333	204.191	4.08	859.637	31.1267	7.314
2019-01-13 09:30:00	355.467	104.067	288.638	4.20667	859.401	31.5533	9.90733
2019-01-13 09:45:00	527.667	124.733	428.465	3.21333	859.354	33.5733	12.4073
2019-01-13 10:00:00	608.267	134.467	493.913	5.95333	859.408	27.4267	14.3633
2019-01-13 10:15:00	663.333	147.133	538.627	5	859.423	30.3533	16.0247
2019-01-13 10:30:00	701.067	142.2	569.265	5.21333	859.431	30.5467	17.348
2019-01-13 10:45:00	744.733	132.133	604.722	5.49333	859.462	29.92	18.4407
2019-01-13 11:00:00	788.4	112	640.181	6.09333	859.385	29.14	19.7293
2019-01-13 11:15:00	828.533	92	672.77	7.00667	859.174	27.6933	20.692
2019-01-13 11:30:00	873.667	74.6	709.417	8.37333	858.975	24.9933	21.6067
2019-01-13 11:45:00	921.267	64	748.069	9.22	858.659	23.3267	22.3467
2019-01-13 12:00:00	955.867	55.3333	776.162	10.0667	858.329	21.8267	22.9747
2019-01-13 12:15:00	1000.33	49	812.271	10.0333	857.948	19.5267	23.6093
2019-01-13 12:30:00	1029.13	45.3333	835.656	10.5867	857.479	18.1267	24.2147
2019-01-13 12:45:00	1049.2	43.2667	851.951	11.08	857.201	15.4533	24.6473
2019-01-13 13:00:00	1057.13	43.0667	858.391	11.5	856.799	13.98	24.8367
2019-01-13 13:15:00	1054.27	42.1333	856.064	12.4133	856.428	12.76	24.7773
2019-01-13 13:30:00	1059.93	40.5333	860.665	13.0133	855.984	13	24.738
2019-01-13 13:45:00	1077.8	38.3333	875.174	14.5	855.139	7.89333	25.4233
2019-01-13 14:00:00	1066.6	38.6	866.079	14.94	854.689	7.19333	25.8607
2019-01-13 14:15:00	1031.2	38.6667	837.335	15.28	854.482	7.50667	25.4247
2019-01-13 14:30:00	995.533	39.5333	808.373	15.42	854.128	7.2	25.0427
2019-01-13 14:45:00	950.2	40.6	771.562	15.72	853.907	6.83333	24.624
2019-01-13 15:00:00	902.867	49.6	733.127	15.8267	853.776	6.96	23.5567
2019-01-13 15:15:00	879.2	44.3333	713.909	16.1267	853.645	6.81333	23.2747
2019-01-13 15:30:00	838.067	40.7333	680.51	16.2533	853.553	6.79333	22.3547
2019-01-13 15:45:00	795.467	39.8	645.919	16.2933	853.445	6.80667	21.4533
2019-01-13 16:00:00	750	38.5333	609	16.4933	853.538	7.16667	20.47
2019-01-13 16:15:00	710	37.6	576.52	16.52	853.545	7.71333	19.3933
2019-01-13 16:30:00	665.467	36.6667	540.36	16.3867	853.486	7.75333	18.106
2019-01-13 16:45:00	617.067	34.9333	501.058	16.52	853.484	7.98	16.6993
2019-01-13 17:00:00	566.267	33.4667	459.808	16.6333	853.369	8.06	15.108
2019-01-13 17:15:00	506.067	32.4667	410.927	16.3667	853.379	8.69333	13.2273
2019-01-13 17:30:00	434.933	30.6	353.165	16.2933	853.331	8.44667	11.166
2019-01-13 17:45:00	350.8	27.3333	284.849	16.2133	853.56	8.44667	8.62733
2019-01-13 18:00:00	263.2	23.3333	213.718	15.8467	853.705	9.03333	5.98467
2019-01-13 18:15:00	174.067	17.6667	141.342	15.5533	853.855	9.26667	3.51933
2019-01-13 18:30:00	79.7333	9.2	64.7447	15.0133	854.057	9.70667	1.41667
2019-01-13 18:45:00	3.06667	0.533333	2.49	14.0333	854.39	10.8133	0.018667
2019-01-13 19:00:00	0	0	0	13.5867	854.517	11.26	0
2019-01-13 19:15:00	0	0	0	13.0067	854.858	12.0533	0
2019-01-13 19:30:00	0	0	0	12.92	855.131	12.1867	0
2019-01-13 19:45:00	0	0	0	12.8267	855.407	12.28	0
2019-01-13 20:00:00	0	0	0	12.58	855.569	12.44	0
2019-01-13 20:15:00	0	0	0	12.5133	855.725	11.9867	0
2019-01-13 20:30:00	0	0	0	12.04	855.943	11.8867	0
2019-01-13 20:45:00	0	0	0	12.2	856	10.8067	0
2019-01-13 21:00:00	0	0	0	12.24	856.059	10.8667	0
2019-01-13 21:15:00	0	0	0	11.8333	856.261	11.86	0
2019-01-13 21:30:00	0	0	0	11.7333	856.561	12.1667	0
2019-01-13 21:45:00	0	0	0	11.6067	856.707	12.3933	0
2019-01-13 22:00:00	0	0	0	11.8067	856.815	11.9867	0
2019-01-13 22:15:00	0	0	0	11.6067	856.884	12.2	0
2019-01-13 22:30:00	0	0	0	11.6733	856.99	12.0067	0
2019-01-13 22:45:00	0	0	0	11.52	856.951	12.1267	0
2019-01-13 23:00:00	0	0	0	11.1	856.891	12.6333	0
2019-01-13 23:15:00	0	0	0	11.34	856.805	12.4867	0
2019-01-13 23:30:00	0	0	0	11.1667	856.707	12.8533	0
2019-01-13 23:45:00	0	0	0	11.0067	856.705	13.34	0
2019-01-14	0	0	0	10.88	856.684	13.6733	0
2019-01-14 00:15:00	0	0	0	10.5867	856.645	14.38	0
2019-01-14 00:30:00	0	0	0	10.4467	856.552	14.9067	0
2019-01-14 00:45:00	0	0	0	10.1933	856.512	15.5133	0
2019-01-14 01:00:00	0	0	0	10.1267	856.528	15.8	0
2019-01-14 01:15:00	0	0	0	10.1733	856.48	15.9467	0
2019-01-14 01:30:00	0	0	0	10.1667	856.441	15.9467	0
2019-01-14 01:45:00	0	0	0	10.1533	856.253	16.02	0
2019-01-14 02:00:00	0	0	0	10.0067	856.147	16.2533	0
2019-01-14 02:15:00	0	0	0	9.8	856.012	16.5067	0
2019-01-14 02:30:00	0	0	0	9.69333	855.86	16.5733	0
2019-01-14 02:45:00	0	0	0	9.3	855.708	17.1933	0
2019-01-14 03:00:00	0	0	0	9.18	855.468	16.9533	0
2019-01-14 03:15:00	0	0	0	9.12	855.273	16.4733	0
2019-01-14 03:30:00	0	0	0	8.76667	855.116	16.7067	0
2019-01-14 03:45:00	0	0	0	8.80667	854.962	16.06	0
2019-01-14 04:00:00	0	0	0	8.75333	854.856	15.7933	0
2019-01-14 04:15:00	0	0	0	9.06667	854.836	14.9533	0
2019-01-14 04:30:00	0	0	0	9.03333	854.775	14.4467	0
2019-01-14 04:45:00	0	0	0	8.80667	854.858	14.4	0
2019-01-14 05:00:00	0	0	0	8.8	854.917	13.8867	0
2019-01-14 05:15:00	0	0	0	8.45333	854.939	14.18	0
2019-01-14 05:30:00	0	0	0	8.06667	854.859	14.36	0
2019-01-14 05:45:00	0	0	0	8.09333	854.925	13.78	0
2019-01-14 06:00:00	0	0	0	7.78667	854.932	14.34	0
2019-01-14 06:15:00	0	0	0	7.33333	855.085	15.1933	0
2019-01-14 06:30:00	0	0	0	6.98667	855.243	15.9267	0
2019-01-14 06:45:00	0	0	0	5.70667	855.273	18.8667	0
2019-01-14 07:00:00	0	0	0	6.13333	855.236	18.06	0
2019-01-14 07:15:00	0	0	0	6.20667	855.357	17.7333	0
2019-01-14 07:30:00	0	0	0	4.71333	855.592	21.48	0
2019-01-14 07:45:00	0	0	0	4.66	855.733	21.4533	0
2019-01-14 08:00:00	0	0	0	4.89333	855.937	20.2867	0
2019-01-14 08:15:00	0.6	0.333333	0.486667	4.93333	856.155	20.04	0
2019-01-14 08:30:00	6.8	4.93333	5.522	5.04667	856.245	20.02	0
2019-01-14 08:45:00	68.8667	14.8	55.9187	5.07333	856.536	20.2333	1.99133
2019-01-14 09:00:00	143.267	45.3333	116.333	5.56	856.567	20.62	4.87933
2019-01-14 09:15:00	259.733	73.8	210.905	5.68667	856.434	20.7867	7.52133
2019-01-14 09:30:00	376.667	91.8667	305.854	6.55333	856.341	20.1067	10.0793
2019-01-14 09:45:00	543.2	106.067	441.079	8.40667	856.343	17.4067	12.4753
2019-01-14 10:00:00	614	113.467	498.568	8.71333	856.253	16.6933	14.4407
2019-01-14 10:15:00	675.067	122.067	548.155	9.15333	856.387	14.7733	16.0927
2019-01-14 10:30:00	726.733	117.733	590.107	9.18667	856.599	14.86	17.5333
2019-01-14 10:45:00	768.267	103.867	623.831	9.7	856.743	14.3867	18.6813
2019-01-14 11:00:00	817.4	88.1333	663.728	10.1467	856.606	13.42	19.9927
2019-01-14 11:15:00	862.733	72.7333	700.54	10.4133	856.396	12.92	21.258
2019-01-14 11:30:00	898.467	60.7333	729.555	10.8733	856.193	12.62	22.2187
2019-01-14 11:45:00	931.533	55.2	756.407	11.74	856.022	11.8	22.9027
2019-01-14 12:00:00	973.8	48.8	790.725	12.3467	855.702	10.3867	23.7313
2019-01-14 12:15:00	1009.13	45.8667	819.417	12.6933	855.294	9.24	24.456
2019-01-14 12:30:00	1046.67	43.8667	849.893	12.9333	855.092	9.48	25.0513
2019-01-14 12:45:00	1059	43	859.909	13.3067	854.803	9.21333	25.2033
2019-01-14 13:00:00	1075.27	44.8	873.116	13.9867	854.32	8.26667	25.5467
2019-01-14 13:15:00	1061.27	48.5333	861.749	14.2333	853.884	7.38	25.4173
2019-01-14 13:30:00	1057.6	53.6667	858.771	14.54	853.463	6.68667	25.5567
2019-01-14 13:45:00	1049.33	53.8	852.057	14.7267	853.101	6.98	25.2227
2019-01-14 14:00:00	1033.73	55.2	839.391	15.0333	852.793	6.4	24.962
2019-01-14 14:15:00	1006.8	59.5333	817.522	15.5267	852.343	5.61333	25.316
2019-01-14 14:30:00	993	45.4	806.315	15.38	852.181	5.96667	24.9793
2019-01-14 14:45:00	935.467	49.8	759.598	15.1133	851.959	7.21333	24.4027
2019-01-14 15:00:00	928.267	55.5333	753.753	15.5667	851.919	8.10667	24.2233
2019-01-14 15:15:00	877.6	64.0667	712.612	15.5867	851.781	8.2	23.126
2019-01-14 15:30:00	851.533	54.0667	691.445	15.4533	851.75	8.34667	22.732
2019-01-14 15:45:00	756.267	58.0667	614.088	15.4733	851.691	8.00667	20.4567
2019-01-14 16:00:00	753.533	51.2667	611.869	15.3	851.615	8.36667	20.594
2019-01-14 16:15:00	709.533	51.8	576.142	15.4667	851.727	9.78667	19.288
2019-01-14 16:30:00	666.6	48.8	541.279	15.2733	851.919	10.04	18.1273
2019-01-14 16:45:00	619.6	50.8667	503.114	15.2333	851.997	10.8533	16.7153
2019-01-14 17:00:00	541.333	44.9333	439.563	14.9533	852.157	11.0867	14.6067
2019-01-14 17:15:00	416.2	55	337.954	14.6333	852.27	12.2467	10.9353
2019-01-14 17:30:00	336.467	45.2667	273.21	14.5067	852.389	12.3667	8.60867
2019-01-14 17:45:00	282.533	44	229.417	14.3	852.564	12.7267	7.096
2019-01-14 18:00:00	254.4	33.7333	206.571	14.1933	852.762	12.9133	5.89533
2019-01-14 18:15:00	92.4667	16.2	75.082	13.5067	852.933	13.9867	1.83267
2019-01-14 18:30:00	70.4	11.4667	57.166	13.1467	853.3	14.28	1.19
2019-01-14 18:45:00	4.6	1.53333	3.73467	12.26	853.523	16.86	0.033333
2019-01-14 19:00:00	0	0	0	10.3333	853.705	26.6467	0
2019-01-14 19:15:00	0	0	0	9.86667	853.983	27.8267	0
2019-01-14 19:30:00	0	0	0	10.6267	854.275	20.5733	0
2019-01-14 19:45:00	0	0	0	10.64	854.487	19.6333	0
2019-01-14 20:00:00	0	0	0	10.4267	854.719	22.7467	0
2019-01-14 20:15:00	0	0	0	9.8	854.866	26.28	0
2019-01-14 20:30:00	0	0	0	9.80667	855.069	26.5667	0
2019-01-14 20:45:00	0	0	0	9.80667	855.241	26.8733	0
2019-01-14 21:00:00	0	0	0	9.90667	855.429	26.5533	0
2019-01-14 21:15:00	0	0	0	9.73333	855.552	26.6533	0
2019-01-14 21:30:00	0	0	0	9.72	855.71	25.9267	0
2019-01-14 21:45:00	0	0	0	9.40667	855.771	26.6933	0
2019-01-14 22:00:00	0	0	0	9.29333	855.919	26.4	0
2019-01-14 22:15:00	0	0	0	9.20667	855.959	26.02	0
2019-01-14 22:30:00	0	0	0	9.02	855.973	26.98	0
2019-01-14 22:45:00	0	0	0	8.73333	856.1	27.5267	0
2019-01-14 23:00:00	0	0	0	8.56	856.115	28.0867	0
2019-01-14 23:15:00	0	0	0	8.58	856.155	28.4267	0
2019-01-14 23:30:00	0	0	0	8.81333	856.224	27.3133	0
2019-01-14 23:45:00	0	0	0	8.82667	856.224	26.5733	0
2019-01-15	0	0	0	8.64	856.223	27.1933	0
2019-01-15 00:15:00	0	0	0	8.30667	856.319	28.48	0
2019-01-15 00:30:00	0	0	0	7.83333	856.312	29.9733	0
2019-01-15 00:45:00	0	0	0	7.64667	856.319	30.44	0
2019-01-15 01:00:00	0	0	0	7.44	856.341	30.1533	0
2019-01-15 01:15:00	0	0	0	7.54	856.245	29.1333	0
2019-01-15 01:30:00	0	0	0	7.27333	856.171	30.22	0
2019-01-15 01:45:00	0	0	0	6.98667	856.076	32.2933	0
2019-01-15 02:00:00	0	0	0	6.31333	855.989	35.2267	0
2019-01-15 02:15:00	0	0	0	5.96	855.889	37.2467	0
2019-01-15 02:30:00	0	0	0	6.22667	855.785	36.5933	0
2019-01-15 02:45:00	0	0	0	6.28667	855.686	36.7267	0
2019-01-15 03:00:00	0	0	0	5.78	855.769	38.66	0
2019-01-15 03:15:00	0	0	0	5.03333	855.763	40.6333	0
2019-01-15 03:30:00	0	0	0	5.04	855.845	40.8933	0
2019-01-15 03:45:00	0	0	0	4.94667	855.719	41.22	0
2019-01-15 04:00:00	0	0	0	4.86667	855.664	41.2467	0
2019-01-15 04:15:00	0	0	0	4.79333	855.687	41.62	0
2019-01-15 04:30:00	0	0	0	4.93333	855.672	41.1933	0
2019-01-15 04:45:00	0	0	0	4.97333	855.616	40.6133	0
2019-01-15 05:00:00	0	0	0	4.70667	855.64	41.2133	0
2019-01-15 05:15:00	0	0	0	3.82	855.727	43.9533	0
2019-01-15 05:30:00	0	0	0	4.25333	855.719	42.1333	0
2019-01-15 05:45:00	0	0	0	4.86	855.793	38.3067	0
2019-01-15 06:00:00	0	0	0	4.60667	855.845	39	0
2019-01-15 06:15:00	0	0	0	4.16	855.77	40.5267	0
2019-01-15 06:30:00	0	0	0	4.24667	855.959	40.82	0
2019-01-15 06:45:00	0	0	0	3.90667	856.076	43.14	0
2019-01-15 07:00:00	0	0	0	3.82667	856.155	45.1733	0
2019-01-15 07:15:00	0	0	0	3.85333	856.327	45.94	0
2019-01-15 07:30:00	0	0	0	3.79333	856.341	47.7867	0
2019-01-15 07:45:00	0	0	0	2.89333	856.652	51.26	0
2019-01-15 08:00:00	0	0	0	1.63333	856.876	54.7067	0
2019-01-15 08:15:00	0.4	0.133333	0.324667	1.99333	857.195	52.9933	0
2019-01-15 08:30:00	8.2	3.46667	6.658	1.86	857.384	55.2867	0
2019-01-15 08:45:00	32.2	11.1333	26.1453	2.96667	857.558	54.6533	0.742
2019-01-15 09:00:00	99.1333	34	80.4967	2.90667	857.665	53.6667	2.85933
2019-01-15 09:15:00	227.6	64	184.811	3.37333	857.781	51	6.238
2019-01-15 09:30:00	300.267	69.9333	243.816	4.7	857.597	49.5267	7.99
2019-01-15 09:45:00	469.133	86.7333	380.935	5.38667	857.765	42.9	10.9533
2019-01-15 10:00:00	546.133	96.7333	443.461	4.48667	857.925	44.44	13.404
2019-01-15 10:15:00	590.067	99.8	479.135	5.57333	857.887	42.6333	14.5033
2019-01-15 10:30:00	665.933	101.8	540.739	6.14667	858.019	40.1467	16.5527
2019-01-15 10:45:00	723.733	92.4667	587.671	5.96667	858.115	40.66	18.15
2019-01-15 11:00:00	766.067	83.3333	622.045	6.50667	858.181	39.7267	19.3207
2019-01-15 11:15:00	806.4	76.6667	654.85	6.89333	858.055	39.08	20.3167
2019-01-15 11:30:00	845.533	69.3333	687.007	7.66667	857.857	37.7333	21.2533
2019-01-15 11:45:00	875.467	65.8	711.095	8.76667	857.603	35.14	21.8287
2019-01-15 12:00:00	929	63.2	754.347	8.91333	857.385	36.3867	22.5513
2019-01-15 12:15:00	969.067	59.8	786.99	8.4	857.097	35.88	23.328
2019-01-15 12:30:00	999.333	58.2667	811.783	8.76667	856.745	35.2933	23.848
2019-01-15 12:45:00	1015.33	56.3333	824.505	9.5	856.38	32.52	24.2867
2019-01-15 13:00:00	1010.47	57.9333	820.39	9.5	856.099	31.22	24.3347
2019-01-15 13:15:00	882.667	68.6667	716.779	10.5267	855.755	29.9867	20.5207
2019-01-15 13:30:00	1047.87	94.4	851.084	10.6	855.356	32.14	24.988
2019-01-15 13:45:00	1036.13	88.1333	841.556	9.88	854.917	32.42	23.4647
2019-01-15 14:00:00	1004.67	73.5333	815.734	9.4	854.612	31.4867	24.8553
2019-01-15 14:15:00	979.067	66.0667	794.894	10.5	854.351	30.56	24.4333
2019-01-15 14:30:00	949.467	66	770.967	10.5	853.975	32.3067	24.2967
2019-01-15 14:45:00	740	66.9333	600.717	9.69333	853.8	31.7267	20.0833
2019-01-15 15:00:00	799.733	73.3333	649.222	10.5	853.592	30.6	22.916
2019-01-15 15:15:00	860.333	58	698.537	10.8667	853.394	22.7867	23.036
2019-01-15 15:30:00	827.933	55.9333	672.119	11.6	853.26	22.7133	22.1287
2019-01-15 15:45:00	791.067	49.8667	642.184	11.6	853.114	21.4467	21.3693
2019-01-15 16:00:00	747.733	47.7333	607.105	11.6	853.018	19.92	20.5933
2019-01-15 16:15:00	698.333	48.4	566.885	11.6	852.933	20.1933	19.3287
2019-01-15 16:30:00	648.733	47.6	526.609	11.6	853.003	19.8333	17.8787
2019-01-15 16:45:00	602.4	47.2667	489.042	11.6	853.077	20.4533	16.4647
2019-01-15 17:00:00	556.267	45.8667	451.471	11.6067	853.325	20.4533	14.9753
2019-01-15 17:15:00	487.867	44.2667	396.147	11.3667	853.433	19.9467	12.8853
2019-01-15 17:30:00	394.133	43	320.037	10.6267	853.901	28.3933	10.23
2019-01-15 17:45:00	301.067	36.2667	244.465	10.48	854.034	29.86	7.51533
2019-01-15 18:00:00	212.533	28.5333	172.579	10.1867	854.05	30.58	4.92067
2019-01-15 18:15:00	100	19.5333	81.1993	9.56667	854.328	31.8	2.06067
2019-01-15 18:30:00	19	6.6	15.428	8.46667	854.502	34	0.242
2019-01-15 18:45:00	0.866667	0.2	0.703333	8.05333	854.632	34.4333	0
2019-01-15 19:00:00	0	0	0	7.79333	854.881	34.26	0
2019-01-15 19:15:00	0	0	0	7.86667	855.101	33.86	0
2019-01-15 19:30:00	0	0	0	7.64667	855.369	34.48	0
2019-01-15 19:45:00	0	0	0	7.38667	855.445	35.5333	0
2019-01-15 20:00:00	0	0	0	7.06667	855.576	37.3267	0
2019-01-15 20:15:00	0	0	0	7.12667	855.702	37.4467	0
2019-01-15 20:30:00	0	0	0	7.57333	855.793	36.3	0
2019-01-15 20:45:00	0	0	0	7.40667	855.941	36.6333	0
2019-01-15 21:00:00	0	0	0	7.34	856.1	36.6133	0
2019-01-15 21:15:00	0	0	0	7.54	856.253	35.6667	0
2019-01-15 21:30:00	0	0	0	7.51333	856.313	36.5533	0
2019-01-15 21:45:00	0	0	0	7.37333	856.449	37.9333	0
2019-01-15 22:00:00	0	0	0	7.66667	856.488	35.5733	0
2019-01-15 22:15:00	0	0	0	7.42	856.496	35.92	0
2019-01-15 22:30:00	0	0	0	7.19333	856.691	36.0133	0
2019-01-15 22:45:00	0	0	0	7.00667	856.774	36.2467	0
2019-01-15 23:00:00	0	0	0	6.93333	856.789	36.3933	0
2019-01-15 23:15:00	0	0	0	6.62	856.791	37.8333	0
2019-01-15 23:30:00	0	0	0	5.94	856.869	39.86	0
2019-01-15 23:45:00	0	0	0	5.71333	856.883	40.5133	0
2019-01-16	0	0	0	5.64286	857.073	40.8571	0
2019-01-16 00:15:00	0	0	0	5.42667	857.232	41.8733	0
2019-01-16 00:30:00	0	0	0	5.36	857.217	42.5267	0
2019-01-16 00:45:00	0	0	0	5.28667	857.202	42.7133	0
2019-01-16 01:00:00	0	0	0	5.70667	857.151	40.4	0
2019-01-16 01:15:00	0	0	0	5.28	857.159	42.2667	0
2019-01-16 01:30:00	0	0	0	5.13333	857.195	43	0
2019-01-16 01:45:00	0	0	0	4.8	857.247	43.98	0
2019-01-16 02:00:00	0	0	0	4.58	857.261	44.72	0
2019-01-16 02:15:00	0	0	0	4.55333	857.368	44.6867	0
2019-01-16 02:30:00	0	0	0	4.72667	857.345	44.4333	0
2019-01-16 02:45:00	0	0	0	4.46667	857.424	45.1267	0
2019-01-16 03:00:00	0	0	0	4.61333	857.512	42.8933	0
2019-01-16 03:15:00	0	0	0	3.94	857.557	44.2267	0
2019-01-16 03:30:00	0	0	0	4.18667	857.656	42.54	0
2019-01-16 03:45:00	0	0	0	4.13333	857.664	40.3333	0
2019-01-16 04:00:00	0	0	0	3.44667	857.757	42.28	0
2019-01-16 04:15:00	0	0	0	2.87333	857.855	45.2067	0
2019-01-16 04:30:00	0	0	0	1.98667	857.941	49.7667	0
2019-01-16 04:45:00	0	0	0	1.81333	857.996	50.8867	0
2019-01-16 05:00:00	0	0	0	2.37	857.936	48.91	0
2019-01-16 05:15:00	0	0	0	2.66	857.924	46.8867	0
2019-01-16 05:30:00	0	0	0	2.48	857.933	47.8533	0
2019-01-16 05:45:00	0	0	0	2.37333	857.885	48.5133	0
2019-01-16 06:00:00	0	0	0	2.72667	857.863	46.5133	0
2019-01-16 06:15:00	0	0	0	2.94667	857.901	44.22	0
2019-01-16 06:30:00	0	0	0	3.00667	858.159	43.22	0
2019-01-16 06:45:00	0	0	0	3.11333	858.297	41.8533	0
2019-01-16 07:00:00	0	0	0	2.82667	858.531	42.48	0
2019-01-16 07:15:00	0	0	0	0.94	858.851	48.88	0
2019-01-16 07:30:00	0	0	0	-0.693333	859.145	56.76	0
2019-01-16 07:45:00	0	0	0	0	859.439	54.4	0
2019-01-16 08:00:00	0	0	0	-0.353333	859.809	55.5733	0
2019-01-16 08:15:00	1.46667	0.6	1.19133	-0.753333	860.145	58.2533	0
2019-01-16 08:30:00	10.4667	6.93333	8.49867	0.133333	860.498	52.12	0.111333
2019-01-16 08:45:00	65.2	15.8667	52.9427	0.873333	860.834	48.8	1.83
2019-01-16 09:00:00	70.4667	22.8	57.2167	2.06667	860.897	46	4.38533
2019-01-16 09:15:00	71	23	57.65	2.1	860.89	45.9	6.82067
2019-01-16 09:30:00	71	23	57.65	2.1	860.89	45.9	9.41067
2019-01-16 09:45:00	71	23	57.65	2.1	860.89	45.9	11.7787
2019-01-16 10:00:00	71	23	57.65	2.1	860.89	45.9	13.8007
2019-01-16 10:15:00	71	23	57.65	2.1	860.89	45.9	15.5593
2019-01-16 10:30:00	71	23	57.65	2.1	860.89	45.9	17.158
2019-01-16 10:45:00	71	23	57.65	2.1	860.89	45.9	18.478
2019-01-16 11:00:00	71	23	57.65	2.1	860.89	45.9	19.76
2019-01-16 11:15:00	71	23	57.65	2.1	860.89	45.9	20.8733
2019-01-16 11:30:00	71	23	57.65	2.1	860.89	45.9	21.87
2019-01-16 11:45:00	71	23	57.65	2.1	860.89	45.9	22.77
2019-01-16 12:00:00	71	23	57.65	2.1	860.89	45.9	23.4607
2019-01-16 12:15:00	71	23	57.65	2.1	860.89	45.9	24.1467
2019-01-16 12:30:00	71	23	57.65	2.1	860.89	45.9	24.666
2019-01-16 12:45:00	71	23	57.65	2.1	860.89	45.9	25.062
2019-01-16 13:00:00	71	23	57.65	2.1	860.89	45.9	25.3013
2019-01-16 13:15:00	71	23	57.65	2.1	860.89	45.9	25.488
2019-01-16 13:30:00	71	23	57.65	2.1	860.89	45.9	25.3333
2019-01-16 13:45:00	71	23	57.65	2.1	860.89	45.9	25.254
2019-01-16 14:00:00	71	23	57.65	2.1	860.89	45.9	24.932
2019-01-16 14:15:00	71	23	57.65	2.1	860.89	45.9	24.4893
2019-01-16 14:30:00	71	23	57.65	2.1	860.89	45.9	24.322
2019-01-16 14:45:00	71	23	57.65	2.1	860.89	45.9	24.161
2019-01-16 15:00:00	71	23	57.65	2.1	860.89	45.9	23.3773
2019-01-16 15:15:00	71	23	57.65	2.1	860.89	45.9	22.9993
2019-01-16 15:30:00	71	23	57.65	2.1	860.89	45.9	22.1587
2019-01-16 15:45:00	71	23	57.65	2.1	860.89	45.9	21.362
2019-01-16 16:00:00	71	23	57.65	2.1	860.89	45.9	20.3293
2019-01-16 16:15:00	713.333	579.226	35.0667	11.84	856.623	6.40667	19.4047
2019-01-16 16:30:00	672.267	545.881	33.3333	12.2	856.449	5.56667	18.2793
2019-01-16 16:45:00	603.067	489.691	36.2	12.3733	856.433	11.4667	16.438
2019-01-16 17:00:00	543.467	441.295	40.9333	12.02	856.402	19.5	14.594
2019-01-16 17:15:00	483	392.196	39.4	11.6133	856.536	22.12	12.8987
2019-01-16 17:30:00	402.667	326.965	40.4	10.5667	856.659	28.7533	10.5693
2019-01-16 17:45:00	322.2	261.626	36.9333	10.06	856.813	30.68	8.25067
2019-01-16 18:00:00	242.067	196.557	31	9.62	856.89	30.9133	5.72
2019-01-16 18:15:00	161.4	131.056	23.0667	9.1	857.089	31.8067	3.394
2019-01-16 18:30:00	108.4	88.024	16.4	8.84	857.276	32.46	2.03
2019-01-16 18:45:00	5.93333	4.81733	2	7.82	857.587	34.16	0.052
2019-01-16 19:00:00	0	0	0	7.48	857.879	34.9067	0
2019-01-16 19:15:00	0	0	0	7.14	858.092	35.74	0
2019-01-16 19:30:00	0	0	0	7.1	858.305	34.1067	0
2019-01-16 19:45:00	0	0	0	7.31333	858.431	32.26	0
2019-01-16 20:00:00	0	0	0	7.27333	858.737	30.44	0
2019-01-16 20:15:00	0	0	0	6.98667	859.129	29.5867	0
2019-01-16 20:30:00	0	0	0	6.99333	859.317	28.1533	0
2019-01-16 20:45:00	0	0	0	6.94667	859.43	27.7067	0
2019-01-16 21:00:00	0	0	0	6.88667	859.655	27.0667	0
2019-01-16 21:15:00	0	0	0	7	859.947	26.1867	0
2019-01-16 21:30:00	0	0	0	6.50667	860.239	26.8333	0
2019-01-16 21:45:00	0	0	0	6.73333	860.498	26.3733	0
2019-01-16 22:00:00	0	0	0	6.6	860.779	27.0467	0
2019-01-16 22:15:00	0	0	0	6.6	860.77	27.16	0
2019-01-16 22:30:00	0	0	0	6.37	860.922	27.92	0
2019-01-16 22:45:00	0	0	0	5.4	861.167	30.0533	0
2019-01-16 23:00:00	0	0	0	5.71333	861.357	29.48	0
2019-01-16 23:15:00	0	0	0	5.74	861.409	29.7133	0
2019-01-16 23:30:00	0	0	0	5.86667	861.525	29.8267	0
2019-01-16 23:45:00	0	0	0	5.15333	861.823	31.5267	0
2019-01-17	0	0	0	3.57857	861.904	35.4214	0
2019-01-17 00:15:00	0	0	0	4.88	861.936	32.7067	0
2019-01-17 00:30:00	0	0	0	5	861.825	33.2267	0
2019-01-17 00:45:00	0	0	0	4.66	861.762	33.7	0
2019-01-17 01:00:00	0	0	0	4.60667	861.639	33.2667	0
2019-01-17 01:15:00	0	0	0	4.62	861.57	33.0133	0
2019-01-17 01:30:00	0	0	0	4.28	861.524	33.6733	0
2019-01-17 01:45:00	0	0	0	4.38	861.485	33.6	0
2019-01-17 02:00:00	0	0	0	4.21333	861.539	34.28	0
2019-01-17 02:15:00	0	0	0	3.10667	861.462	36.9333	0
2019-01-17 02:30:00	0	0	0	2.3	861.424	39.02	0
2019-01-17 02:45:00	0	0	0	2.51333	861.485	38.54	0
2019-01-17 03:00:00	0	0	0	2.34	861.409	39.0133	0
2019-01-17 03:15:00	0	0	0	2.26667	861.401	39.42	0
2019-01-17 03:30:00	0	0	0	1.93333	861.402	40.68	0
2019-01-17 03:45:00	0	0	0	2.34	861.299	39.5	0
2019-01-17 04:00:00	0	0	0	2.14667	861.283	39.8733	0
2019-01-17 04:15:00	0	0	0	1.45333	861.291	42.74	0
2019-01-17 04:30:00	0	0	0	1.17333	861.357	43.9	0
2019-01-17 04:45:00	0	0	0	0.66	861.313	45.4133	0
2019-01-17 05:00:00	0	0	0	0.706667	861.261	45.02	0
2019-01-17 05:15:00	0	0	0	0.226667	861.191	46.6067	0
2019-01-17 05:30:00	0	0	0	-0.246667	860.995	48.96	0
2019-01-17 05:45:00	0	0	0	-0.293333	860.918	48.9867	0
2019-01-17 06:00:00	0	0	0	-0.093333	860.933	48.1933	0
2019-01-17 06:15:00	0	0	0	-0.26	861.107	48.9933	0
2019-01-17 06:30:00	0	0	0	-0.82	861.387	51.6733	0
2019-01-17 06:45:00	0	0	0	0.013333	861.599	49.0467	0
2019-01-17 07:00:00	0	0	0	-1.09333	861.754	51.92	0
2019-01-17 07:15:00	0	0	0	-1.66667	861.875	54.5467	0
2019-01-17 07:30:00	0	0	0	-0.693333	861.831	51.2	0
2019-01-17 07:45:00	0	0	0	0	861.623	48.5067	0
2019-01-17 08:00:00	0	0	0	0.56	861.517	46.0267	0
2019-01-17 08:15:00	0.933333	0.757333	0.6	0.013333	861.509	47.9467	0
2019-01-17 08:30:00	9.4	7.63333	5.86667	-0.546667	861.541	49.9867	0.058
2019-01-17 08:45:00	64.4	52.2933	16.1333	-0.06	861.715	49.0867	1.84667
2019-01-17 09:00:00	103.267	83.8527	33.1333	-0.646667	861.913	51.7667	4.318
2019-01-17 09:15:00	267.6	217.289	46.4	-0.653333	862.015	52.34	6.73333
2019-01-17 09:30:00	327.8	266.172	56.8667	0.98	861.975	47.9133	9.278
2019-01-17 09:45:00	511.867	415.637	65.7333	0.506667	862.129	49.78	11.7053
2019-01-17 10:00:00	544.867	442.431	68	2.67333	862.03	43.2	13.7467
2019-01-17 10:15:00	628.133	510.045	70.5333	2.06	862.084	45.3	15.5
2019-01-17 10:30:00	675.6	548.589	69.4	1.92667	862.214	47.8533	16.986
2019-01-17 10:45:00	720.867	585.345	63.6	2.88667	862.359	44.8733	18.2873
2019-01-17 11:00:00	775	629.299	57.5333	4.01333	862.306	41.0067	19.65
2019-01-17 11:15:00	818.133	664.325	54.6667	4.24667	862.191	39.7467	20.7
2019-01-17 11:30:00	856.067	695.126	53.1333	4.86667	862.085	37.9	21.5587
2019-01-17 11:45:00	895.4	727.065	51.2667	6.22	862.144	34.92	22.342
2019-01-17 12:00:00	944.533	766.961	50.9333	6.00667	861.961	34.5333	23.1673
2019-01-17 12:15:00	979.733	795.543	50.6667	6.39333	861.762	32.44	23.7527
2019-01-17 12:30:00	1001.67	813.353	50.8667	7.01333	861.319	31.2533	24.0747
2019-01-17 12:45:00	1024.87	832.191	49.2	7.88667	860.825	29.26	24.358
2019-01-17 13:00:00	1039	843.669	48.9333	8.79333	860.355	25.9867	24.6007
2019-01-17 13:15:00	991.333	804.963	69	8.80667	859.955	24.42	23.7833
2019-01-17 13:30:00	1051.33	853.683	72.2667	9.06	859.592	23.9333	25.05
2019-01-17 13:45:00	1047.53	850.597	63.4667	9.55333	859.265	23.5133	24.922
2019-01-17 14:00:00	1028.93	835.493	89.5333	10.0467	858.653	20.6067	24.6593
2019-01-17 14:15:00	1011.13	821.04	57.5333	10.7267	858.229	20.06	24.5387
2019-01-17 14:30:00	971.067	788.507	54.9333	11.14	857.863	19.1733	24.0967
2019-01-17 14:45:00	920.667	747.583	54	11.4733	857.441	18.3467	23.212
2019-01-17 15:00:00	890.267	722.897	51.2667	11.6267	857.066	18.22	22.9473
2019-01-17 15:15:00	850.467	690.579	48.9333	12.14	856.836	17.3667	22.116
2019-01-17 15:30:00	808.333	656.367	49.6	12.4067	856.513	16.9133	21.2213
2019-01-17 15:45:00	760.6	617.609	50.3333	13.0667	856.305	16.6867	20.2947
2019-01-17 16:00:00	708.067	574.951	51	13.1067	856.084	15.9733	19.132
2019-01-17 16:15:00	662.867	538.248	50.2	13.8067	855.996	15.1067	17.9927
2019-01-17 16:30:00	617.467	501.383	48.9333	13.9533	855.959	17.0133	16.7673
2019-01-17 16:45:00	581.133	471.881	47	13.2067	855.822	20.4933	15.5913
2019-01-17 17:00:00	523.2	424.838	42.6667	14.3	855.663	17.6067	14.1533
2019-01-17 17:15:00	461.067	374.387	42.0667	13.6933	855.687	20.1867	12.324
2019-01-17 17:30:00	408.067	331.351	40.2667	12.9467	855.711	22.64	10.7727
2019-01-17 17:45:00	330.467	268.339	34.6	12.5	855.853	23.58	8.52867
2019-01-17 18:00:00	249.533	202.622	29	11.8267	855.89	25.1867	6.02067
2019-01-17 18:15:00	167.6	136.09	21.9333	11.2333	855.937	25.6	3.62333
2019-01-17 18:30:00	88.6667	71.9967	12.5333	10.72	855.996	25.9067	1.60267
2019-01-17 18:45:00	6.4	5.19667	1.46667	10.18	856.124	25.72	0.074
2019-01-17 19:00:00	0	0	0	9.47333	856.216	26.3667	0
2019-01-17 19:15:00	0	0	0	9.1	856.335	26.1733	0
2019-01-17 19:30:00	0	0	0	9.06667	856.513	25.4933	0
2019-01-17 19:45:00	0	0	0	8.68	856.668	26.5933	0
2019-01-17 20:00:00	0	0	0	8.51333	856.867	26.8067	0
2019-01-17 20:15:00	0	0	0	8.32667	857.181	26.9733	0
2019-01-17 20:30:00	0	0	0	8.37333	857.27	26.6733	0
2019-01-17 20:45:00	0	0	0	8.07333	857.384	26.9667	0
2019-01-17 21:00:00	0	0	0	7.86667	857.62	27.5933	0
2019-01-17 21:15:00	0	0	0	8.02667	857.757	27.7267	0
2019-01-17 21:30:00	0	0	0	7.85333	857.841	28.1867	0
2019-01-17 21:45:00	0	0	0	7.76	857.916	28.3333	0
2019-01-17 22:00:00	0	0	0	7.62667	858.152	29.24	0
2019-01-17 22:15:00	0	0	0	7.38667	858.182	30.7267	0
2019-01-17 22:30:00	0	0	0	7.1	858.273	32.6533	0
2019-01-17 22:45:00	0	0	0	7.07333	858.44	33.1	0
2019-01-17 23:00:00	0	0	0	6.86667	858.517	34.1933	0
2019-01-17 23:15:00	0	0	0	6.71333	858.575	35.18	0
2019-01-17 23:30:00	0	0	0	6.77333	858.509	35.1067	0
2019-01-17 23:45:00	0	0	0	6.74	858.479	35.2533	0
2019-01-18	0	0	0	6.48571	858.429	36.3143	0
2019-01-18 00:15:00	0	0	0	6.18	858.538	37.3867	0
2019-01-18 00:30:00	0	0	0	5.99333	858.455	37.2933	0
2019-01-18 00:45:00	0	0	0	6.04	858.368	37.1267	0
2019-01-18 01:00:00	0	0	0	5.85333	858.328	38.2067	0
2019-01-18 01:15:00	0	0	0	5.3	858.265	40.1733	0
2019-01-18 01:30:00	0	0	0	5.46	858.257	39.64	0
2019-01-18 01:45:00	0	0	0	5.56	858.13	39.1467	0
2019-01-18 02:00:00	0	0	0	5.34667	858.071	39.68	0
2019-01-18 02:15:00	0	0	0	5.12	858.011	40.3867	0
2019-01-18 02:30:00	0	0	0	5.02667	857.924	40.4333	0
2019-01-18 02:45:00	0	0	0	4.98	857.893	40.14	0
2019-01-18 03:00:00	0	0	0	4.60667	857.789	41.36	0
2019-01-18 03:15:00	0	0	0	4.51333	857.703	41.9333	0
2019-01-18 03:30:00	0	0	0	4.84667	857.589	40.74	0
2019-01-18 03:45:00	0	0	0	5.17333	857.472	39.2267	0
2019-01-18 04:00:00	0	0	0	5.29333	857.408	38.3333	0
2019-01-18 04:15:00	0	0	0	5.41333	857.203	37.8067	0
2019-01-18 04:30:00	0	0	0	5.14667	857.121	38.5133	0
2019-01-18 04:45:00	0	0	0	4.98	856.997	38.9867	0
2019-01-18 05:00:00	0	0	0	4.90667	857.02	39.2267	0
2019-01-18 05:15:00	0	0	0	4.64667	857.091	39.9733	0
2019-01-18 05:30:00	0	0	0	4.49333	856.975	40.5533	0
2019-01-18 05:45:00	0	0	0	4.14	856.943	41.5467	0
2019-01-18 06:00:00	0	0	0	3.81333	856.966	42.7733	0
2019-01-18 06:15:00	0	0	0	3.33333	857.151	44.38	0
2019-01-18 06:30:00	0	0	0	3.18	857.337	44.8867	0
2019-01-18 06:45:00	0	0	0	3.42	857.557	43.9267	0
2019-01-18 07:00:00	0	0	0	3.32667	857.742	43.8333	0
2019-01-18 07:15:00	0	0	0	3.12	857.819	44.42	0
2019-01-18 07:30:00	0	0	0	3.11333	857.971	44.3867	0
2019-01-18 07:45:00	0	0	0	1.66	858.305	49.6733	0
2019-01-18 08:00:00	0	0	0	2	858.454	49.3357	0
2019-01-18 08:15:00	0.933333	0.758	0.666667	2.86667	858.575	45.3667	0
2019-01-18 08:30:00	9.4	7.63267	6.66667	2.97333	858.876	44.6933	0.078667
2019-01-18 08:45:00	55.4667	45.0387	16.2	3.38667	859.007	43.7333	1.774
2019-01-18 09:00:00	103.4	83.96	28.7333	3.55333	859.052	43.62	4.26733
2019-01-18 09:15:00	267.733	217.399	38.3333	3.36	859.144	44.4933	6.822
2019-01-18 09:30:00	349.467	283.767	46.9333	3.78	859.183	43.82	9.486
2019-01-18 09:45:00	521	423.052	53.4	4.67333	859.25	40.86	12.0053
2019-01-18 10:00:00	554.067	449.903	55.4	5.08	859.317	40.22	14.056
2019-01-18 10:15:00	634.467	515.189	56.1333	4.95333	859.332	42.18	15.7953
2019-01-18 10:30:00	685	556.221	53.8	6.24	859.309	37.1933	17.282
2019-01-18 10:45:00	732.667	594.925	50.0667	6.54	859.377	35.3933	18.63
2019-01-18 11:00:00	785.533	637.852	47.5333	6.44	859.251	34.8333	19.9967
2019-01-18 11:15:00	822.4	667.788	47.4	6.49	859.225	34.1	21.051
2019-01-18 11:30:00	864.533	702.003	48	7.15333	859.022	32.7667	22.1187
2019-01-18 11:45:00	914.067	742.222	48	7.62667	858.635	31.3933	23.2607
2019-01-18 12:00:00	948.867	770.48	49.2667	8.41333	858.314	27.9733	24.1153
2019-01-18 12:15:00	987.933	802.2	47.2667	8.72667	857.864	24.1733	24.8393
2019-01-18 12:30:00	1018	826.615	44.9333	9.52667	857.472	19.48	25.5433
2019-01-18 12:45:00	1039.27	843.886	44.5333	9.80667	857.126	17.82	25.946
2019-01-18 13:00:00	1048.4	851.3	44.6	9.89333	856.767	18.5533	26.274
2019-01-18 13:15:00	1048.4	851.299	45.9333	10.1333	856.52	18.98	26.318
2019-01-18 13:30:00	1047.33	850.435	46.3333	10.44	856.107	18.76	26.32
2019-01-18 13:45:00	1039	843.667	47.3333	10.7867	855.593	18.8267	26.1593
2019-01-18 14:00:00	1031.13	837.279	47.5333	10.9667	855.163	18.6133	26.0907
2019-01-18 14:15:00	1005.2	816.223	47.8	11.1	854.803	18.52	25.882
2019-01-18 14:30:00	969.4	787.153	47.6	11.62	854.504	18.5333	25.4987
2019-01-18 14:45:00	927.267	752.94	48	11.4267	853.999	19.36	25.016
2019-01-18 15:00:00	891.357	723.781	47.5714	11.5071	853.913	19.5786	24.4427
2019-01-18 15:15:00	859.467	697.887	46.8	11.7933	853.607	19.5467	23.8107
2019-01-18 15:30:00	822.067	667.517	46.6	11.9067	853.476	19.5333	23.0367
2019-01-18 15:45:00	776.267	630.329	46.6	11.96	853.284	19.74	21.9913
2019-01-18 16:00:00	729.667	592.489	46.4667	12.3267	853.299	19.4067	20.9527
2019-01-18 16:15:00	688.6	559.145	45.6	12.44	853.177	18.8333	19.778
2019-01-18 16:30:00	646.067	524.607	44.1333	12.4733	853.039	19.2067	18.4713
2019-01-18 16:45:00	601.867	488.717	42.6	12.5333	852.847	18.9533	17.036
2019-01-18 17:00:00	553.533	449.469	40.4667	12.6867	853.16	19.3733	15.4567
2019-01-18 17:15:00	494	401.129	38.0667	12.9	853.184	19.2467	13.5407
2019-01-18 17:30:00	424.2	344.451	35.9333	12.64	853.146	20.04	11.4053
2019-01-18 17:45:00	341	276.893	32.0667	12.6	853.099	20.58	8.92933
2019-01-18 18:00:00	257.667	209.225	27.5333	12.22	853.084	21.3333	6.296
2019-01-18 18:15:00	174.533	141.721	21.3333	11.8333	853.331	22.28	3.788
2019-01-18 18:30:00	102.3	83.069	14.3	11.49	853.493	23.4	1.924
2019-01-18 18:45:00	14.8	12.018	3.6	10.94	853.587	24.89	0.21
2019-01-18 19:00:00	0	0	0	10.2267	853.983	25.9333	0
2019-01-18 19:15:00	0	0	0	9.96	854.165	26.4267	0
2019-01-18 19:30:00	0	0	0	9.59333	854.359	27.1267	0
2019-01-18 19:45:00	0	0	0	9.28667	854.609	27.7733	0
2019-01-18 20:00:00	0	0	0	9.05333	854.799	28.54	0
2019-01-18 20:15:00	0	0	0	9.10667	854.939	29.2533	0
2019-01-18 20:30:00	0	0	0	9.15333	855.046	30.2	0
2019-01-18 20:45:00	0	0	0	8.80667	855.196	31.2933	0
2019-01-18 21:00:00	0	0	0	8.57333	855.355	31.9333	0
2019-01-18 21:15:00	0	0	0	8.4	855.461	32.54	0
2019-01-18 21:30:00	0	0	0	8.44	855.632	32.7933	0
2019-01-18 21:45:00	0	0	0	8.29333	855.732	33.52	0
2019-01-18 22:00:00	0	0	0	8.10667	855.815	34.9733	0
2019-01-18 22:15:00	0	0	0	8.04667	855.949	35.86	0
2019-01-18 22:30:00	0	0	0	8.09	856.026	36.04	0
2019-01-18 22:45:00	0	0	0	7.72667	856.261	37.1067	0
2019-01-18 23:00:00	0	0	0	7.56	856.305	37.78	0
2019-01-18 23:15:00	0	0	0	7.44667	856.41	37.8267	0
2019-01-18 23:30:00	0	0	0	7.23333	856.457	38.1667	0
2019-01-18 23:45:00	0	0	0	7.04667	856.567	38.5	0
2019-01-19	0	0	0	6.96	856.597	39.02	0
2019-01-19 00:15:00	0	0	0	6.7	856.699	39.6733	0
2019-01-19 00:30:00	0	0	0	6.49333	856.661	40.1933	0
2019-01-19 00:45:00	0	0	0	6.34667	856.661	39.6933	0
2019-01-19 01:00:00	0	0	0	6.02	856.646	39.9333	0
2019-01-19 01:15:00	0	0	0	6.00667	856.713	39.5267	0
2019-01-19 01:30:00	0	0	0	5.85333	856.775	39.7467	0
2019-01-19 01:45:00	0	0	0	5.65333	856.93	40.2333	0
2019-01-19 02:00:00	0	0	0	5.65333	856.897	40.2867	0
2019-01-19 02:15:00	0	0	0	5.40667	856.845	40.9133	0
2019-01-19 02:30:00	0	0	0	5.57333	856.869	40.34	0
2019-01-19 02:45:00	0	0	0	5.58667	856.989	40.1	0
2019-01-19 03:00:00	0	0	0	5.70667	856.966	39.6067	0
2019-01-19 03:15:00	0	0	0	5.64	856.975	39.72	0
2019-01-19 03:30:00	0	0	0	5.39333	856.929	40.3933	0
2019-01-19 03:45:00	0	0	0	5.33333	856.882	40.7267	0
2019-01-19 04:00:00	0	0	0	5.36	857.006	40.8733	0
2019-01-19 04:15:00	0	0	0	5.36667	857.037	40.9733	0
2019-01-19 04:30:00	0	0	0	5.20667	856.998	41.84	0
2019-01-19 04:45:00	0	0	0	5.18667	857.075	42.14	0
2019-01-19 05:00:00	0	0	0	4.92667	857.217	43.2067	0
2019-01-19 05:15:00	0	0	0	4.73333	857.181	44.1333	0
2019-01-19 05:30:00	0	0	0	4.70667	857.329	44.5867	0
2019-01-19 05:45:00	0	0	0	4.69333	857.232	44.4333	0
2019-01-19 06:00:00	0	0	0	4.69333	857.181	44.3133	0
2019-01-19 06:15:00	0	0	0	4.54667	857.122	44.66	0
2019-01-19 06:30:00	0	0	0	4.54	857.283	44.2133	0
2019-01-19 06:45:00	0	0	0	4.52667	857.368	43.8067	0
2019-01-19 07:00:00	0	0	0	4.47333	857.511	43.9867	0
2019-01-19 07:15:00	0	0	0	4.18	857.718	45.4667	0
2019-01-19 07:30:00	0	0	0	3.91333	857.894	45.9	0
2019-01-19 07:45:00	0	0	0	4.02667	857.924	44.7533	0
2019-01-19 08:00:00	0	0	0	4.11333	857.956	43.8	0
2019-01-19 08:15:00	1.2	0.974	0.733333	3.95333	858.019	44.08	0
2019-01-19 08:30:00	9	7.308	6.13333	3.95333	858.153	44.48	0.018667
2019-01-19 08:45:00	47.7333	38.7587	12.8667	3.02667	858.352	48	2.10733
2019-01-19 09:00:00	110.933	90.0773	23.7333	3.47333	858.312	47.56	4.82733
2019-01-19 09:15:00	287.2	233.206	32.5333	4.56667	858.242	44.2133	7.40533
2019-01-19 09:30:00	386.867	314.136	36.2667	5.02667	858.212	43.5	10.026
2019-01-19 09:45:00	535.267	434.636	38.8667	6.94	858.312	38.7333	12.4027
2019-01-19 10:00:00	566.333	459.862	40.4	6.68	858.424	38.7933	14.3147
2019-01-19 10:15:00	650	527.801	40.8	7.24667	858.583	36	16.0593
2019-01-19 10:30:00	702	570.024	40.0667	7.96667	858.719	33.7067	17.5867
2019-01-19 10:45:00	751.333	610.083	38.6667	7.2	858.876	33.22	19.014
2019-01-19 11:00:00	799.467	649.167	36.3333	7.52667	858.977	31.3467	20.3187
2019-01-19 11:15:00	841.333	683.161	37.7333	7.45333	858.835	30.8933	21.358
2019-01-19 11:30:00	879.867	714.451	39	7.6	858.658	27.6667	22.352
2019-01-19 11:45:00	923	749.475	41.5333	7.78	858.447	26.0267	23.2847
2019-01-19 12:00:00	961.533	780.764	42	8.15333	858.221	24.6	24.226
2019-01-19 12:15:00	1002.4	813.948	40.7333	8.38667	858.062	22.9867	25.0153
2019-01-19 12:30:00	1027.4	834.249	39.5333	8.76	857.749	22.6	25.308
2019-01-19 12:45:00	1049.73	852.384	39.6	8.89333	857.369	21.8867	25.9507
2019-01-19 13:00:00	1051.8	854.063	39.2667	9.34	857.187	21.06	25.9913
2019-01-19 13:15:00	1052.67	854.765	39.7333	9.70667	856.821	19.78	25.9233
2019-01-19 13:30:00	1060.53	861.152	40	10.1933	856.206	17.1	26.1713
2019-01-19 13:45:00	1001.53	813.245	41.6667	10.2133	855.785	16.48	25.5253
2019-01-19 14:00:00	935.4	759.545	44.6667	10.56	855.239	15.52	24.5567
2019-01-19 14:15:00	985.667	800.361	52.4667	10.96	854.863	14.3667	24.724
2019-01-19 14:30:00	825.333	670.171	65.9333	11.1	854.564	14.3867	22.2047
2019-01-19 14:45:00	989.6	803.555	72.9333	11.5933	854.321	14.5133	26.0707
2019-01-19 15:00:00	936	760.033	52.9333	11.8467	854.027	13.3533	24.976
2019-01-19 15:15:00	884.333	718.079	47.4667	11.6733	853.87	13.56	23.9187
2019-01-19 15:30:00	844.333	685.6	45.8667	11.7667	853.699	13.4533	23.04
2019-01-19 15:45:00	800.4	649.926	44.6667	12.3	853.521	12.7	22.126
2019-01-19 16:00:00	750.333	609.271	43	12.1467	853.387	12.5267	20.97
2019-01-19 16:15:00	703.6	571.323	42.3333	11.9333	853.285	12.32	19.6947
2019-01-19 16:30:00	659.933	535.867	41	12.2333	853.229	12.7267	18.414
2019-01-19 16:45:00	622.4	505.39	39.3	12.35	853.17	12.05	17.234
2019-01-19 17:00:00	570.267	463.056	38.2667	12.56	853.199	12.8533	15.6013
2019-01-19 17:15:00	510.867	414.824	35.7333	12.4933	853.331	12.2	13.7033
2019-01-19 17:30:00	442.867	359.609	33.5333	12.4067	853.324	12.1067	11.646
2019-01-19 17:45:00	360.2	292.483	29.8	12.32	853.561	12.1133	9.34
2019-01-19 18:00:00	280.067	227.415	25.6	12.16	853.637	11.96	6.76667
2019-01-19 18:15:00	195.333	158.611	19.8667	11.88	853.823	11.4267	4.318
2019-01-19 18:30:00	106.733	86.6673	12.4	11.3933	853.877	11.82	2.01933
2019-01-19 18:45:00	14.6	11.8553	2.2	10.5667	854.135	13.0733	0.290667
2019-01-19 19:00:00	0	0	0	9.96	854.331	13.56	0
2019-01-19 19:15:00	0	0	0	9.54	854.541	13.9333	0
2019-01-19 19:30:00	0	0	0	9.46	854.851	14.2267	0
2019-01-19 19:45:00	0	0	0	9.32	855.133	14.54	0
2019-01-19 20:00:00	0	0	0	9.20667	855.385	14.5933	0
2019-01-19 20:15:00	0	0	0	8.94667	855.538	14.9867	0
2019-01-19 20:30:00	0	0	0	9.00667	855.746	15.1	0
2019-01-19 20:45:00	0	0	0	9.09333	856.068	15.3667	0
2019-01-19 21:00:00	0	0	0	8.88	856.185	16.24	0
2019-01-19 21:15:00	0	0	0	8.57333	856.358	17.6333	0
2019-01-19 21:30:00	0	0	0	8.48667	856.528	18.2467	0
2019-01-19 21:45:00	0	0	0	8.66	856.669	18.8867	0
2019-01-19 22:00:00	0	0	0	8.48	856.798	20.4267	0
2019-01-19 22:15:00	0	0	0	8.37333	857.004	21.8267	0
2019-01-19 22:30:00	0	0	0	8.16667	856.996	21.9733	0
2019-01-19 22:45:00	0	0	0	7.83333	857.044	22.1067	0
2019-01-19 23:00:00	0	0	0	7.55333	857.276	22.2667	0
2019-01-19 23:15:00	0	0	0	7.58	857.368	22.05	0
2019-01-19 23:30:00	0	0	0	7.79	857.522	20.4	0
2019-01-19 23:45:00	0	0	0	7.60667	857.611	20.4667	0
2019-01-20	0	0	0	7.54167	857.681	20.625	0
2019-01-20 00:15:00	0	0	0	6.56667	857.941	22.7533	0
2019-01-20 00:30:00	0	0	0	6.64	857.955	22.86	0
2019-01-20 00:45:00	0	0	0	6.58667	858.092	22.72	0
2019-01-20 01:00:00	0	0	0	6.36	858.049	23.1533	0
2019-01-20 01:15:00	0	0	0	6.3	857.933	22.9933	0
2019-01-20 01:30:00	0	0	0	6.42	857.879	22.0533	0
2019-01-20 01:45:00	0	0	0	6.33333	857.78	21.6467	0
2019-01-20 02:00:00	0	0	0	6.28	857.748	21.36	0
2019-01-20 02:15:00	0	0	0	4.06667	857.94	27.1467	0
2019-01-20 02:30:00	0	0	0	3.91333	858.176	27.9267	0
2019-01-20 02:45:00	0	0	0	3.40667	858.273	29.8733	0
2019-01-20 03:00:00	0	0	0	3.33333	858.392	30.42	0
2019-01-20 03:15:00	0	0	0	3.78	858.368	29.58	0
2019-01-20 03:30:00	0	0	0	3.80667	858.368	29.02	0
2019-01-20 03:45:00	0	0	0	3.52667	858.408	29.7933	0
2019-01-20 04:00:00	0	0	0	3.00667	858.44	30.9533	0
2019-01-20 04:15:00	0	0	0	2.76	858.487	31.6133	0
2019-01-20 04:30:00	0	0	0	2.64667	858.479	31.5267	0
2019-01-20 04:45:00	0	0	0	2.81333	858.392	30.5467	0
2019-01-20 05:00:00	0	0	0	2.33333	858.44	31.5467	0
2019-01-20 05:15:00	0	0	0	2.36667	858.455	31.4933	0
2019-01-20 05:30:00	0	0	0	2.34	858.44	31.2333	0
2019-01-20 05:45:00	0	0	0	2.4	858.464	30.8933	0
2019-01-20 06:00:00	0	0	0	2.54	858.463	30.58	0
2019-01-20 06:15:00	0	0	0	1.96	858.591	32.2133	0
2019-01-20 06:30:00	0	0	0	1.31333	858.764	34.3333	0
2019-01-20 06:45:00	0	0	0	1.56	858.968	33.8933	0
2019-01-20 07:00:00	0	0	0	0.853333	858.961	35.4933	0
2019-01-20 07:15:00	0	0	0	0.76	858.999	35.3	0
2019-01-20 07:30:00	0	0	0	0.973333	859.113	34.4533	0
2019-01-20 07:45:00	0	0	0	0.206667	859.355	36.4667	0
2019-01-20 08:00:00	0	0	0	0.333333	859.623	36.3267	0
2019-01-20 08:15:00	1.26667	1.02867	0.4	-0.633333	859.947	39.82	0
2019-01-20 08:30:00	10.0667	8.174	6.33333	-0.86	860.03	41.3333	0.078667
2019-01-20 08:45:00	36	29.232	14.4667	-0.9	860.208	43.78	1.99267
2019-01-20 09:00:00	126	102.312	24.1333	1.08667	860.224	38.3867	4.672
2019-01-20 09:15:00	281.533	228.605	30.8	1.74	860.037	36.2	7.29
2019-01-20 09:30:00	399.8	324.639	35.4	1.94667	859.811	35.4467	9.97267
2019-01-20 09:45:00	529.933	430.305	37.8667	3.17333	859.708	32.5	12.3793
2019-01-20 10:00:00	564.733	458.563	39.9333	2.44	859.879	34.86	14.2947
2019-01-20 10:15:00	632.267	513.401	41.9333	2.69333	860.029	35.8133	15.8687
2019-01-20 10:30:00	681.933	553.729	46	2.52667	860.176	36.9067	17.388
2019-01-20 10:45:00	722	586.263	47.8667	2.71333	860.326	36.2667	18.736
2019-01-20 11:00:00	766.467	622.369	49.1333	3.22	860.295	35.8867	19.9393
2019-01-20 11:15:00	812.4	659.669	50.4	3.72	860.193	34.9733	21.1193
2019-01-20 11:30:00	855	694.261	51.6667	4.64	859.911	32.8533	22.1607
2019-01-20 11:45:00	893.267	725.334	52.4	5.54	859.708	31.0133	22.9433
2019-01-20 12:00:00	928.8	754.185	52.3333	6.34667	859.5	28.6733	23.5433
2019-01-20 12:15:00	969.067	786.882	51.9333	6.9	859.212	26.9867	24.1387
2019-01-20 12:30:00	995.6	808.426	52.3333	7.41333	858.898	26.0133	24.544
2019-01-20 12:45:00	1010.73	820.715	53.4	7.76	858.627	25.7	24.8233
2019-01-20 13:00:00	1021.67	829.593	52.2	8.04667	858.321	25.6	25.016
2019-01-20 13:15:00	1027.4	834.248	50.6	9.08	857.94	24.7933	25.084
2019-01-20 13:30:00	1030.6	836.847	50.2667	9.55333	857.626	23.8133	25.0873
2019-01-20 13:45:00	1035.27	840.638	49.8667	9.85333	857.279	22.12	25.2233
2019-01-20 14:00:00	1019.6	827.915	50.5333	9.61333	856.959	22.72	24.9453
2019-01-20 14:15:00	996	808.753	51.1333	10.28	856.591	21.9267	24.764
2019-01-20 14:30:00	959.067	778.763	51	11.08	856.253	20.3	24.488
2019-01-20 14:45:00	919.933	746.986	51.9333	11.1667	855.922	19.6867	23.984
2019-01-20 15:00:00	880.333	714.831	54.8667	11.0333	855.6	19.4533	23.5527
2019-01-20 15:15:00	843.267	684.732	57.4	10.6867	855.453	21.4267	22.9447
2019-01-20 15:30:00	800.533	650.033	59.8	10.9133	855.319	22.18	22.0707
2019-01-20 15:45:00	756.067	613.926	65.6	11.2933	855.196	22.0933	21.1107
2019-01-20 16:00:00	711.2	577.495	60.7333	11.1667	855.078	23.1667	20.088
2019-01-20 16:15:00	674.867	547.992	58.2667	11.54	855.148	19.3533	19.0607
2019-01-20 16:30:00	633	513.996	59	11.8467	855.085	18	17.8327
2019-01-20 16:45:00	601.867	488.716	58.6667	11.7	855.029	18.1333	16.8013
2019-01-20 17:00:00	545	442.539	56.5333	11.76	855.084	18.92	14.9833
2019-01-20 17:15:00	473.4	384.402	48.5	11.35	855.104	23.96	12.976
2019-01-20 17:30:00	397.333	322.636	46.3333	10.1667	855.28	28.2533	10.7247
2019-01-20 17:45:00	320.067	259.892	44.7333	9.79333	855.414	29.1267	8.47733
2019-01-20 18:00:00	240.467	195.258	38.5333	9.49333	855.608	29.7133	6
2019-01-20 18:15:00	162.667	132.087	33.0667	9.5	855.801	28.9733	3.71
2019-01-20 18:30:00	83.8	68.044	19.6	8.79333	855.951	30.56	1.75133
2019-01-20 18:45:00	13.2	10.7187	3.93333	8.02	856.171	32.1067	0.197333
2019-01-20 19:00:00	0	0	0	7.52	856.313	32.9733	0
2019-01-20 19:15:00	0	0	0	7.34	856.575	33.2733	0
2019-01-20 19:30:00	0	0	0	7.19333	856.691	33.4333	0
2019-01-20 19:45:00	0	0	0	7.14	856.783	33.3933	0
2019-01-20 20:00:00	0	0	0	7.14667	857.021	33.28	0
2019-01-20 20:15:00	0	0	0	7.07333	857.195	33.2267	0
2019-01-20 20:30:00	0	0	0	7.19333	857.345	32.7867	0
2019-01-20 20:45:00	0	0	0	6.98667	857.424	32.9533	0
2019-01-20 21:00:00	0	0	0	7.03	857.452	33.06	0
2019-01-20 21:15:00	0	0	0	6.88	857.712	33.3133	0
2019-01-20 21:30:00	0	0	0	7.02667	857.94	33.0933	0
2019-01-20 21:45:00	0	0	0	6.84	858.145	33.8933	0
2019-01-20 22:00:00	0	0	0	6.78667	858.249	34.4267	0
2019-01-20 22:15:00	0	0	0	6.47333	858.486	35.3267	0
2019-01-20 22:30:00	0	0	0	6.34667	858.766	35.7533	0
2019-01-20 22:45:00	0	0	0	6.20667	858.859	36.0267	0
2019-01-20 23:00:00	0	0	0	6.18	859.105	36.3933	0
2019-01-20 23:15:00	0	0	0	6.12	859.243	36.5733	0
2019-01-20 23:30:00	0	0	0	6.11333	859.401	36.8333	0
2019-01-20 23:45:00	0	0	0	5.98667	859.47	37.62	0
2019-01-21	0	0	0	6.09	859.589	37.44	0
2019-01-21 00:15:00	0	0	0	5.69333	859.605	38.84	0
2019-01-21 00:30:00	0	0	0	5.55333	859.621	39.5	0
2019-01-21 00:45:00	0	0	0	5.38667	859.629	40.2533	0
2019-01-21 01:00:00	0	0	0	4.92667	859.66	40.98	0
2019-01-21 01:15:00	0	0	0	5.37333	859.858	40.5733	0
2019-01-21 01:30:00	0	0	0	5.23333	859.873	40.5267	0
2019-01-21 01:45:00	0	0	0	4.28667	859.904	42.8267	0
2019-01-21 02:00:00	0	0	0	4.28	859.779	43.5933	0
2019-01-21 02:15:00	0	0	0	4.49333	859.732	44.0267	0
2019-01-21 02:30:00	0	0	0	4.76	859.715	43.7467	0
2019-01-21 02:45:00	0	0	0	4.37333	859.74	43.9533	0
2019-01-21 03:00:00	0	0	0	3.70667	859.676	46.5733	0
2019-01-21 03:15:00	0	0	0	2.76	859.74	47.5867	0
2019-01-21 03:30:00	0	0	0	2.20667	859.819	48.5867	0
2019-01-21 03:45:00	0	0	0	2.52	859.889	47.4867	0
2019-01-21 04:00:00	0	0	0	2.18	859.851	48.9067	0
2019-01-21 04:15:00	0	0	0	1.66667	860.015	51.44	0
2019-01-21 04:30:00	0	0	0	1.53333	860.007	52.3933	0
2019-01-21 04:45:00	0	0	0	1.62	859.904	51.5	0
2019-01-21 05:00:00	0	0	0	1.7	859.948	51.19	0
2019-01-21 05:15:00	0	0	0	1.16667	860.029	53.7733	0
2019-01-21 05:30:00	0	0	0	1.24	859.992	54.12	0
2019-01-21 05:45:00	0	0	0	0.866667	860.192	54.74	0
2019-01-21 06:00:00	0	0	0	0.166667	860.232	58.2333	0
2019-01-21 06:15:00	0	0	0	1	860.144	56.3333	0
2019-01-21 06:30:00	0	0	0	1.19333	860.152	55.3133	0
2019-01-21 06:45:00	0	0	0	0.626667	860.466	56.6867	0
2019-01-21 07:00:00	0	0	0	0.593333	860.415	57.2867	0
2019-01-21 07:15:00	0	0	0	1.14667	860.733	55.58	0
2019-01-21 07:30:00	0	0	0	0.226667	861.041	57.4933	0
2019-01-21 07:45:00	0	0	0	-0.026667	861.276	58.1	0
2019-01-21 08:00:00	0	0	0	0	861.223	59.0733	0
2019-01-21 08:15:00	2	1.624	1.2	-0.113333	861.042	59.7267	0
2019-01-21 08:30:00	13	10.556	8.13333	-0.173333	861.089	60.46	0.18
2019-01-21 08:45:00	33	26.7967	17.7333	0.186667	861.223	58.3733	1.82
2019-01-21 09:00:00	145.867	118.443	26.9333	0.006667	861.296	59.1467	4.16467
2019-01-21 09:15:00	252.8	205.273	34.1333	-0.886667	861.501	62.4667	6.58933
2019-01-21 09:30:00	384	311.809	37.8	1.48667	861.446	55.06	9.24333
2019-01-21 09:45:00	484.667	393.549	40.9333	3.48	861.646	46.9867	11.5347
2019-01-21 10:00:00	524.267	425.703	45.5333	3.62667	861.717	47.08	13.43
2019-01-21 10:15:00	601.067	488.066	48.6667	3.41333	861.999	47.7133	15.242
2019-01-21 10:30:00	654.267	531.265	52.1333	3.01333	862.061	49.14	16.816
2019-01-21 10:45:00	706.533	573.705	54.3333	2.98667	861.96	50.6067	18.366
2019-01-21 11:00:00	749.267	608.405	54.6	4.59333	861.891	46.16	19.5847
2019-01-21 11:15:00	792.4	643.428	55.7333	6.18667	861.655	41.2733	20.572
2019-01-21 11:30:00	817.867	664.108	62.1333	5.66667	861.493	42.96	21.3713
2019-01-21 11:45:00	869.267	705.845	61.8	5.78667	861.463	42.8333	22.32
2019-01-21 12:00:00	909.667	738.65	61.8	6.7	861.221	40.54	22.9913
2019-01-21 12:15:00	951.333	772.484	62.3333	7.26	860.995	39.4	23.6193
2019-01-21 12:30:00	979.8	795.598	60.6667	8.02667	860.687	37.6333	24.1407
2019-01-21 12:45:00	1000.2	812.162	56.2667	9.09333	860.237	34.88	24.5033
2019-01-21 13:00:00	1002.87	814.329	57.0667	9.36667	859.847	32.6133	24.594
2019-01-21 13:15:00	1020.87	828.944	57.8	9.84667	859.439	30.0133	24.9007
2019-01-21 13:30:00	1023.53	831.109	59.4	9.55333	858.991	31.08	24.916
2019-01-21 13:45:00	1018.13	826.724	58	10.4667	858.529	28.28	24.902
2019-01-21 14:00:00	1004.47	815.629	59.0667	10.34	858.091	27.72	24.64
2019-01-21 14:15:00	987.533	801.876	61.4	10.4333	857.703	27.4867	24.596
2019-01-21 14:30:00	957	777.085	59.7333	10.62	857.347	27.4733	24.2167
2019-01-21 14:45:00	917.667	745.146	58.3333	11.1267	857.09	26.84	23.7633
2019-01-21 15:00:00	863.867	701.459	66.6667	11.1133	856.759	33.16	22.9113
2019-01-21 15:15:00	833	676.396	72	10.53	856.589	36.05	22.737
2019-01-21 15:30:00	782.733	635.58	72.4	10.4467	856.289	36.6867	21.8247
2019-01-21 15:45:00	748.6	607.863	75.6	10.4333	856.246	36.92	21.1733
2019-01-21 16:00:00	699.867	568.291	66.4667	10.7867	856.177	36.2133	20.0347
2019-01-21 16:15:00	668.267	542.634	63	10.92	856.076	35.0533	19.2253
2019-01-21 16:30:00	636	516.432	58	11.1067	856.068	33.8867	18.1293
2019-01-21 16:45:00	600.6	487.688	50.8	11.4933	856.131	33.8733	16.988
2019-01-21 17:00:00	546.067	443.407	46.4667	11.84	856.108	31.8	15.222
2019-01-21 17:15:00	487	395.443	43.5333	11.4333	856.085	32.8067	13.378
2019-01-21 17:30:00	422.4	342.989	38.7333	11.9333	856.092	29.8467	11.4493
2019-01-21 17:45:00	344	279.329	33.0667	12.32	855.998	23.4267	9.15933
2019-01-21 18:00:00	261.8	212.582	29.4	12.32	856.108	21.64	6.53933
2019-01-21 18:15:00	177.067	143.777	21.4	11.5467	856.202	28.1133	4.052
2019-01-21 18:30:00	100.067	81.2553	13	10.8067	856.179	27.4467	1.98933
2019-01-21 18:45:00	16.4	13.3167	2.66667	9.98	856.351	30.62	0.276667
2019-01-21 19:00:00	0	0	0	9.09333	856.537	32.2667	0
2019-01-21 19:15:00	0	0	0	9.03	856.544	30.76	0
2019-01-21 19:30:00	0	0	0	9.24667	856.729	28.02	0
[truncated: 68,177 more rows]
