# Supplementary material
Source: PeerJ journal article supplement (doi:10.7717/peerj-cs.3610)
Supplement: Solar_station_site_8_Nominal_capacity30MW.xlsx [file Solar_station_site_8_Nominal_capacity30MW.xlsx]

## Sheet: Sheet1
Time(year-month-day h:m:s)	Total solar irradiance (W/m2)	Direct normal irradiance (W/m2)	Global horizontal irradiance (W/m2)	Air temperature (°C)	Atmosphere (hpa)	Relative humidity (%)	Power (MW)
2019-01-01	0	0	0	2.96059	948.919	69.2505	0
2019-01-01 00:15:00	0	0	0	1.23	988.2	88.41	0
2019-01-01 00:30:00	0	0	0	1.44	921.9	83.1	0
2019-01-01 00:45:00	0	0	0	1.47	944.23	72.45	0
2019-01-01 01:00:00	0	0	0	1.7	1015.2	87.07	0
2019-01-01 01:15:00	0	0	0	1.73	958.73	85.49	0
2019-01-01 01:30:00	0	0	0	1.9	937.63	72.31	0
2019-01-01 01:45:00	0	0	0	1.63	933.04	83.25	0
2019-01-01 02:00:00	0	0	0	2.05	950.13	83.59	0
2019-01-01 02:15:00	0	0	0	2.1	983.98	83.17	0
2019-01-01 02:30:00	0	0	0	1.87	997.01	84.56	0
2019-01-01 02:45:00	0	0	0	2.05	922.15	79.65	0
2019-01-01 03:00:00	0	0	0	2.15	1011.36	83.5	0
2019-01-01 03:15:00	0	0	0	2.14	1002.42	76.02	0
2019-01-01 03:30:00	0	0	0	2.11	941.2	76.74	0
2019-01-01 03:45:00	0	0	0	2.36	922.94	79.57	0
2019-01-01 04:00:00	0	0	0	2.47	936.56	72.75	0
2019-01-01 04:15:00	0	0	0	2.32	990.32	78.08	0
2019-01-01 04:30:00	0	0	0	2.67	977.76	69.25	0
2019-01-01 04:45:00	0	0	0	2.74	963.69	79.88	0
2019-01-01 05:00:00	0	0	0	2.69	983.82	74.99	0
2019-01-01 05:15:00	0	0	0	2.81	923.23	78.71	0
2019-01-01 05:30:00	0	0	0	2.74	975.27	81.19	0
2019-01-01 05:45:00	0	0	0	2.88	923.02	79.99	0
2019-01-01 06:00:00	0	0	0	2.82	943.85	79.37	0
2019-01-01 06:15:00	0	0	0	3.14	997.56	81.06	0
2019-01-01 06:30:00	0	0	0	2.88	978.01	66.83	0
2019-01-01 06:45:00	0	0	0	2.99	949.59	70.95	0
2019-01-01 07:00:00	0	0	0	3.33	944.6	67.25	0
2019-01-01 07:15:00	0	0	0	2.9	961.92	73.56	0
2019-01-01 07:30:00	10.29	8.95	1.34	3.21	979.79	67.56	0.41
2019-01-01 07:45:00	18.04	15.69	2.34	3.26	1012.46	76.13	0.69
2019-01-01 08:00:00	28.92	25.16	3.76	3.22	960.37	70.51	1.17
2019-01-01 08:15:00	39.83	34.65	5.18	3.09	1008.44	76.57	1.55
2019-01-01 08:30:00	49.42	43	6.42	3.91	939.78	67.95	2.15
2019-01-01 08:45:00	73.9	64.29	9.61	3.42	964.07	77.81	2.76
2019-01-01 09:00:00	78.83	68.58	10.25	4.25	973.33	75.54	2.71
2019-01-01 09:15:00	100.89	87.77	13.12	4.56	982.75	63.41	3.44
2019-01-01 09:30:00	96.37	83.84	12.53	5.04	975.69	69.44	4.2
2019-01-01 09:45:00	125.22	108.94	16.28	4.79	1006.54	68.01	4.05
2019-01-01 10:00:00	122.2	106.31	15.89	4.6	958.79	61.2	4.44
2019-01-01 10:15:00	151.43	131.75	19.69	5.46	972.16	60.83	4.84
2019-01-01 10:30:00	170.44	148.28	22.16	5.96	934.28	62.8	6.13
2019-01-01 10:45:00	167.47	145.7	21.77	6.59	935.17	68.59	6.39
2019-01-01 11:00:00	179.89	156.5	23.39	5.9	950.78	68.61	7.32
2019-01-01 11:15:00	183.15	159.34	23.81	5.61	956.91	70.7	6.96
2019-01-01 11:30:00	211.96	184.4	27.55	6.8	919.98	69.99	7.02
2019-01-01 11:45:00	202.6	176.26	26.34	6.35	925.02	66.05	7.27
2019-01-01 12:00:00	225.34	196.05	29.29	7.08	984.24	61.99	8.77
2019-01-01 12:15:00	220.24	191.61	28.63	6.88	999.66	63.76	8.29
2019-01-01 12:30:00	258.01	224.47	33.54	8.23	1012.84	60.4	8.08
2019-01-01 12:45:00	263.57	229.3	34.26	8.02	976.71	62.97	9.59
2019-01-01 13:00:00	267.16	232.43	34.73	7.96	925.37	56.61	9.72
2019-01-01 13:15:00	271.22	235.96	35.26	7.25	1004.44	57.68	9.66
2019-01-01 13:30:00	272.86	237.39	35.47	7.96	981.55	58.7	9.06
2019-01-01 13:45:00	236.91	206.12	30.8	8.49	944.66	59.81	9.66
2019-01-01 14:00:00	243.64	211.96	31.67	7.66	941.26	59.9	8.81
2019-01-01 14:15:00	187.23	162.89	24.34	9.03	1012.95	66.66	7.06
2019-01-01 14:30:00	171.32	149.05	22.27	7.15	979.3	63.66	7.1
2019-01-01 14:45:00	159.21	138.51	20.7	7.58	931.41	58.57	6.24
2019-01-01 15:00:00	129.13	112.34	16.79	7.45	944.89	67.16	5.24
2019-01-01 15:15:00	131.17	114.11	17.05	7.77	970.67	62.65	4.15
2019-01-01 15:30:00	110.64	96.25	14.38	7.9	969.59	65.69	3.34
2019-01-01 15:45:00	95.49	83.08	12.41	6.41	950.33	67.3	2.85
2019-01-01 16:00:00	60.19	52.36	7.82	6.17	945.93	69.12	2.2
2019-01-01 16:15:00	44.16	38.42	5.74	5.9	938.29	65.91	1.67
2019-01-01 16:30:00	31.93	27.78	4.15	5.26	978.12	77.05	1.02
2019-01-01 16:45:00	17.44	15.17	2.27	5.27	989.66	74.39	0.55
2019-01-01 17:00:00	0	0	0	6.1	996.91	65.63	0
2019-01-01 17:15:00	0	0	0	5.16	988.26	76.33	0
2019-01-01 17:30:00	0	0	0	5.59	993.26	77.61	0
2019-01-01 17:45:00	0	0	0	4.84	944.25	74.87	0
2019-01-01 18:00:00	0	0	0	5.6	966.05	73.99	0
2019-01-01 18:15:00	0	0	0	4.92	988.37	75.04	0
2019-01-01 18:30:00	0	0	0	4.46	937.36	80	0
2019-01-01 18:45:00	0	0	0	4.7	982.76	75.27	0
2019-01-01 19:00:00	0	0	0	4.24	925.47	72.23	0
2019-01-01 19:15:00	0	0	0	4.48	988.49	80.48	0
2019-01-01 19:30:00	0	0	0	4.18	960.18	82.66	0
2019-01-01 19:45:00	0	0	0	4.48	932.6	81.88	0
2019-01-01 20:00:00	0	0	0	3.98	947.65	79.22	0
2019-01-01 20:15:00	0	0	0	3.66	924.11	90.24	0
2019-01-01 20:30:00	0	0	0	4.01	921.05	83.61	0
2019-01-01 20:45:00	0	0	0	4.2	974.42	79.15	0
2019-01-01 21:00:00	0	0	0	4.16	918.96	79.71	0
2019-01-01 21:15:00	0	0	0	3.88	997.13	88.56	0
2019-01-01 21:30:00	0	0	0	3.79	961.09	80.55	0
2019-01-01 21:45:00	0	0	0	4.03	1009.77	78.37	0
2019-01-01 22:00:00	0	0	0	3.44	938.41	76.75	0
2019-01-01 22:15:00	0	0	0	3.52	963.6	77.41	0
2019-01-01 22:30:00	0	0	0	3.86	1009.72	79.03	0
2019-01-01 22:45:00	0	0	0	3.74	960.78	77.77	0
2019-01-01 23:00:00	0	0	0	3.65	931.07	78.97	0
2019-01-01 23:15:00	0	0	0	4.06	968.28	92.17	0
2019-01-01 23:30:00	0	0	0	3.7	1015.89	76.71	0
2019-01-01 23:45:00	0	0	0	3.42	983.33	76.58	0
2019-01-02	0	0	0	4.26	1015.06	83.55	0
2019-01-02 00:15:00	0	0	0	3.38	948.64	77.22	0
2019-01-02 00:30:00	0	0	0	3.39	949.41	81.33	0
2019-01-02 00:45:00	0	0	0	3.81	1012.45	87.12	0
2019-01-02 01:00:00	0	0	0	3.84	947.73	91.33	0
2019-01-02 01:15:00	0	0	0	3.08	955.36	76.71	0
2019-01-02 01:30:00	0	0	0	3.77	1023.86	78.31	0
2019-01-02 01:45:00	0	0	0	3.52	969.8	90.45	0
2019-01-02 02:00:00	0	0	0	3.56	972.23	85.23	0
2019-01-02 02:15:00	0	0	0	3.08	946.73	79.39	0
2019-01-02 02:30:00	0	0	0	3.29	945.28	84.3	0
2019-01-02 02:45:00	0	0	0	3.03	988.51	90.52	0
2019-01-02 03:00:00	0	0	0	3.69	1017.02	86.83	0
2019-01-02 03:15:00	0	0	0	3.56	1009.17	80.13	0
2019-01-02 03:30:00	0	0	0	3.76	948.1	86.43	0
2019-01-02 03:45:00	0	0	0	3.51	942.46	78.88	0
2019-01-02 04:00:00	0	0	0	3.12	934	76.18	0
2019-01-02 04:15:00	0	0	0	3.99	1022.35	88.05	0
2019-01-02 04:30:00	0	0	0	3.32	930.74	78.52	0
2019-01-02 04:45:00	0	0	0	3.23	1002.96	76.08	0
2019-01-02 05:00:00	0	0	0	3.69	978.49	85.4	0
2019-01-02 05:15:00	0	0	0	4.08	1020.39	88.3	0
2019-01-02 05:30:00	0	0	0	3.67	997.03	76.32	0
2019-01-02 05:45:00	0	0	0	4.15	988.71	89.51	0
2019-01-02 06:00:00	0	0	0	3.74	954.7	78.45	0
2019-01-02 06:15:00	0	0	0	4.33	989.83	84.39	0
2019-01-02 06:30:00	0	0	0	3.75	933.65	74.32	0
2019-01-02 06:45:00	0	0	0	3.72	970.31	81.42	0
2019-01-02 07:00:00	0	0	0	3.8	979.61	89.01	0
2019-01-02 07:15:00	13.04	11.35	1.7	4.32	972.61	81.05	0.35
2019-01-02 07:30:00	25.29	22	3.29	4.55	1018.09	76.23	0.86
2019-01-02 07:45:00	37.71	32.81	4.9	4.73	1003.8	72.43	1.35
2019-01-02 08:00:00	55.12	47.96	7.17	4.05	950.45	71.7	1.81
2019-01-02 08:15:00	67.69	58.89	8.8	4.01	975.18	74.35	2.3
2019-01-02 08:30:00	101.7	88.48	13.22	4.57	987.41	84.62	2.78
2019-01-02 08:45:00	100.03	87.03	13	5.72	1018.07	72.63	3.76
2019-01-02 09:00:00	135.12	117.55	17.57	4.99	993.63	71.83	4.16
2019-01-02 09:15:00	131.99	114.83	17.16	5.65	965.21	82.65	4.62
2019-01-02 09:30:00	149.55	130.11	19.44	7	972.23	73.86	5.06
2019-01-02 09:45:00	164.49	143.11	21.38	7.34	1006.4	67.94	5.99
2019-01-02 10:00:00	197.87	172.15	25.72	7.77	962.91	64.91	6.03
2019-01-02 10:15:00	183.5	159.65	23.86	8.22	1001.28	62.78	6.8
2019-01-02 10:30:00	240.43	209.18	31.26	8.36	958.24	75.93	6.22
2019-01-02 10:45:00	204.08	177.55	26.53	9.32	956.86	64.76	7.66
2019-01-02 11:00:00	228.12	198.46	29.66	8.62	931.51	64.39	8.27
2019-01-02 11:15:00	254.5	221.41	33.08	8.59	1000.72	66.51	8.13
2019-01-02 11:30:00	256.1	222.8	33.29	9.8	1000.71	70.65	8.93
2019-01-02 11:45:00	294.69	256.38	38.31	8.8	963.51	69.79	8.94
2019-01-02 12:00:00	318.22	276.85	41.37	9.47	952.54	64.87	8.05
2019-01-02 12:15:00	297.32	258.67	38.65	10.39	963.7	70.25	8.4
2019-01-02 12:30:00	274.78	239.06	35.72	9.78	965.36	67.21	10.81
2019-01-02 12:45:00	328.05	285.4	42.65	10.59	1015.27	71.28	10.14
2019-01-02 13:00:00	291.6	253.69	37.91	11.39	990.75	61.77	10.03
2019-01-02 13:15:00	318.16	276.8	41.36	11.76	1002.66	63.11	9.04
2019-01-02 13:30:00	285.16	248.09	37.07	9.88	1015.38	65.93	9.16
2019-01-02 13:45:00	271.24	235.98	35.26	11.64	944.12	72.08	9.45
2019-01-02 14:00:00	282.2	245.51	36.69	9.5	964.93	61.83	9.15
2019-01-02 14:15:00	277.01	240.99	36.01	10.92	979.18	62.43	8.51
2019-01-02 14:30:00	263.36	229.13	34.24	10.53	1011.08	61.82	8.62
2019-01-02 14:45:00	216.5	188.35	28.14	9.7	950.42	75.03	8.09
2019-01-02 15:00:00	191.88	166.94	24.94	10.92	1011.24	72.71	6.38
2019-01-02 15:15:00	193.66	168.49	25.18	10.93	1024.52	64.67	6.16
2019-01-02 15:30:00	186.41	162.18	24.23	10.5	991.61	77.02	5.89
2019-01-02 15:45:00	168.11	146.26	21.85	9.95	948.77	78.06	5.06
2019-01-02 16:00:00	115.28	100.29	14.99	9.93	1005.9	68.55	3.52
2019-01-02 16:15:00	96.49	83.94	12.54	9.49	987.71	72.23	2.82
2019-01-02 16:30:00	59.03	51.35	7.67	8.34	947.68	78.2	1.75
2019-01-02 16:45:00	32.97	28.68	4.29	8.24	980.4	71.84	1.14
2019-01-02 17:00:00	11.47	9.98	1.49	8.84	989.97	81.64	0.4
2019-01-02 17:15:00	0	0	0	7.77	1008.02	78.41	0
2019-01-02 17:30:00	0	0	0	7.31	1026.45	81.54	0
2019-01-02 17:45:00	0	0	0	7.24	934.39	72.95	0
2019-01-02 18:00:00	0	0	0	6.74	934.79	80.99	0
2019-01-02 18:15:00	0	0	0	6.98	955.37	81.14	0
2019-01-02 18:30:00	0	0	0	6.1	1011.99	83.33	0
2019-01-02 18:45:00	0	0	0	6.74	987.59	84.22	0
2019-01-02 19:00:00	0	0	0	5.79	987.22	91.99	0
2019-01-02 19:15:00	0	0	0	6.63	968.42	82.65	0
2019-01-02 19:30:00	0	0	0	6.32	1022.98	80.59	0
2019-01-02 19:45:00	0	0	0	5.59	999.36	92.74	0
2019-01-02 20:00:00	0	0	0	5.45	978.94	78.02	0
2019-01-02 20:15:00	0	0	0	6.43	1004.62	84.08	0
2019-01-02 20:30:00	0	0	0	5.69	1000.55	79.84	0
2019-01-02 20:45:00	0	0	0	5.68	963.55	93.4	0
2019-01-02 21:00:00	0	0	0	6.01	1008.76	96.75	0
2019-01-02 21:15:00	0	0	0	6.3	987.12	89.82	0
2019-01-02 21:30:00	0	0	0	6.24	943.18	94.58	0
2019-01-02 21:45:00	0	0	0	5.56	945.62	95.74	0
2019-01-02 22:00:00	0	0	0	5.03	948.2	87.97	0
2019-01-02 22:15:00	0	0	0	5.78	958.81	97.64	0
2019-01-02 22:30:00	0	0	0	4.84	1016.93	88.58	0
2019-01-02 22:45:00	0	0	0	4.92	1008.68	82.62	0
2019-01-02 23:00:00	0	0	0	5.11	978.87	94.64	0
2019-01-02 23:15:00	0	0	0	5	932.08	97.41	0
2019-01-02 23:30:00	0	0	0	5.19	967.25	94.65	0
2019-01-02 23:45:00	0	0	0	5.43	976.56	95.12	0
2019-01-03	0	0	0	5.04	976	96.35	0
2019-01-03 00:15:00	0	0	0	3.76	1033.37	96.65	0
2019-01-03 00:30:00	0	0	0	4.21	958.7	96.88	0
2019-01-03 00:45:00	0	0	0	4.38	1019.4	79.39	0
2019-01-03 01:00:00	0	0	0	4.13	1030.24	88.99	0
2019-01-03 01:15:00	0	0	0	4.46	1017.92	85.29	0
2019-01-03 01:30:00	0	0	0	4.6	1028.41	82.46	0
2019-01-03 01:45:00	0	0	0	3.9	1025.72	79.46	0
2019-01-03 02:00:00	0	0	0	4.4	951.3	90.16	0
2019-01-03 02:15:00	0	0	0	3.96	994.09	88.18	0
2019-01-03 02:30:00	0	0	0	4.35	964.23	89.61	0
2019-01-03 02:45:00	0	0	0	4.26	936.08	85.95	0
2019-01-03 03:00:00	0	0	0	4.61	998.5	94.72	0
2019-01-03 03:15:00	0	0	0	4.03	995.94	81.13	0
2019-01-03 03:30:00	0	0	0	4.47	1023.13	82.28	0
2019-01-03 03:45:00	0	0	0	4.52	941.28	92.99	0
2019-01-03 04:00:00	0	0	0	4.01	937.95	90	0
2019-01-03 04:15:00	0	0	0	3.6	945.57	80.02	0
2019-01-03 04:30:00	0	0	0	3.93	982.84	82.49	0
2019-01-03 04:45:00	0	0	0	4.32	994.62	83.49	0
2019-01-03 05:00:00	0	0	0	4.27	966.47	80.63	0
2019-01-03 05:15:00	0	0	0	4.32	938.51	97.83	0
2019-01-03 05:30:00	0	0	0	3.99	995.83	88.56	0
2019-01-03 05:45:00	0	0	0	4.14	991.9	79.94	0
2019-01-03 06:00:00	0	0	0	3.89	1013.25	81.22	0
2019-01-03 06:15:00	0	0	0	4.18	950.53	84.07	0
2019-01-03 06:30:00	0	0	0	4.66	1000.43	79.52	0
2019-01-03 06:45:00	0	0	0	4.11	995.17	82.34	0
2019-01-03 07:00:00	0	0	0	4.35	936.5	80.89	0
2019-01-03 07:15:00	15.52	13.5	2.02	5.09	986.28	88.3	0.54
2019-01-03 07:30:00	33.54	29.18	4.36	4.58	1015.88	79.26	1.15
2019-01-03 07:45:00	56.25	48.94	7.31	5.45	963.98	90.97	1.64
2019-01-03 08:00:00	80.74	70.24	10.5	5.39	938.75	91.64	2.29
2019-01-03 08:15:00	112.91	98.23	14.68	5.68	991.28	82.54	3.32
2019-01-03 08:30:00	140.78	122.48	18.3	5.54	991.37	91.18	3.76
2019-01-03 08:45:00	161.68	140.66	21.02	6.22	975.4	81.55	5.58
2019-01-03 09:00:00	197.79	172.08	25.71	6.61	957.96	88.96	5.45
2019-01-03 09:15:00	226.17	196.77	29.4	8.81	978.55	81.77	6.01
2019-01-03 09:30:00	239.44	208.31	31.13	8.39	961.33	76.84	7.39
2019-01-03 09:45:00	212.21	184.63	27.59	8.86	1002.47	79.67	6.9
2019-01-03 10:00:00	225.02	195.76	29.25	10.39	1023.39	72.35	7.32
2019-01-03 10:15:00	292.8	254.73	38.06	10.64	951.4	74.13	7.72
2019-01-03 10:30:00	290.93	253.11	37.82	11.59	1016.08	68.33	8.21
2019-01-03 10:45:00	288.85	251.3	37.55	11.82	1022.87	62.85	8.81
2019-01-03 11:00:00	285.35	248.25	37.1	11.42	996.56	66.86	9.75
2019-01-03 11:15:00	292.37	254.36	38.01	12.75	960.52	62.84	10.59
2019-01-03 11:30:00	336.11	292.42	43.69	12.65	950.7	70.58	9.97
2019-01-03 11:45:00	349.35	303.94	45.42	12.97	963.89	73.04	10.93
2019-01-03 12:00:00	304.67	265.06	39.61	11.59	951.91	74.56	11.27
2019-01-03 12:15:00	368.82	320.87	47.95	14.39	941.32	68.66	11.25
2019-01-03 12:30:00	338.71	294.68	44.03	13.75	950.77	64.94	10.66
2019-01-03 12:45:00	342.25	297.76	44.49	15.16	980.8	62.36	12.46
2019-01-03 13:00:00	353.95	307.94	46.01	14.13	971.39	67.67	11.2
2019-01-03 13:15:00	325.85	283.49	42.36	15.87	959.71	65.45	12.07
2019-01-03 13:30:00	330.4	287.45	42.95	15.82	1021.7	65.08	11.16
2019-01-03 13:45:00	315.54	274.52	41.02	14.02	1026.64	61.04	10.75
2019-01-03 14:00:00	318.93	277.47	41.46	13.91	966.25	65.81	9.9
2019-01-03 14:15:00	306.94	267.04	39.9	13.65	983	59.01	10.36
2019-01-03 14:30:00	305.36	265.66	39.7	15.36	980.14	60.6	8.47
2019-01-03 14:45:00	263.35	229.11	34.24	15.17	971.94	66.07	8.84
2019-01-03 15:00:00	244.25	212.49	31.75	14.25	996.44	65.21	8.09
2019-01-03 15:15:00	244.91	213.07	31.84	14.5	939.45	68.31	7.32
2019-01-03 15:30:00	176.15	153.25	22.9	12.05	998.39	63.48	6.19
2019-01-03 15:45:00	162.77	141.61	21.16	13.57	1024.34	71.41	5.25
2019-01-03 16:00:00	125.07	108.81	16.26	11.38	945.2	66.96	4.56
2019-01-03 16:15:00	113.17	98.46	14.71	12.94	939.45	79.99	2.9
2019-01-03 16:30:00	66.17	57.57	8.6	12.04	998.62	70.74	2.07
2019-01-03 16:45:00	35.54	30.92	4.62	12.89	1031.28	71.86	1.04
2019-01-03 17:00:00	12.84	11.17	1.67	10.56	994.93	75.09	0.44
2019-01-03 17:15:00	0	0	0	10.02	971.78	70.42	0
2019-01-03 17:30:00	0	0	0	12.04	953.93	82.33	0
2019-01-03 17:45:00	0	0	0	11.42	1001.82	76.39	0
2019-01-03 18:00:00	0	0	0	11.06	965.38	83.27	0
2019-01-03 18:15:00	0	0	0	10.86	986.79	75.64	0
2019-01-03 18:30:00	0	0	0	9.61	973.43	87.47	0
2019-01-03 18:45:00	0	0	0	8.79	1026.36	91.91	0
2019-01-03 19:00:00	0	0	0	8.34	968.61	77.59	0
2019-01-03 19:15:00	0	0	0	8.7	1030.94	81.63	0
2019-01-03 19:30:00	0	0	0	8.44	948.11	81.61	0
2019-01-03 19:45:00	0	0	0	7.45	997.52	81.76	0
2019-01-03 20:00:00	0	0	0	6.82	1027.28	93.97	0
2019-01-03 20:15:00	0	0	0	6.6	974.84	85.53	0
2019-01-03 20:30:00	0	0	0	7.98	977.51	82.77	0
2019-01-03 20:45:00	0	0	0	6.78	962.9	81.46	0
2019-01-03 21:00:00	0	0	0	7.22	964.34	81.79	0
2019-01-03 21:15:00	0	0	0	7.14	988.72	92.86	0
2019-01-03 21:30:00	0	0	0	6.43	941.15	95.9	0
2019-01-03 21:45:00	0	0	0	7.18	1030.28	94.35	0
2019-01-03 22:00:00	0	0	0	6.19	939.08	89.17	0
2019-01-03 22:15:00	0	0	0	5.64	995.77	97.08	0
2019-01-03 22:30:00	0	0	0	6.23	946.69	94.47	0
2019-01-03 22:45:00	0	0	0	5.61	1000.42	99.35	0
2019-01-03 23:00:00	0	0	0	5.66	941.55	91.97	0
2019-01-03 23:15:00	0	0	0	6.19	965.37	88.97	0
2019-01-03 23:30:00	0	0	0	5.78	960.08	96.87	0
2019-01-03 23:45:00	0	0	0	7.08	1001.04	86.61	0
2019-01-04	0	0	0	6.33	940.46	91.21	0
2019-01-04 00:15:00	0	0	0	8.91	1024.21	97.51	0
2019-01-04 00:30:00	0	0	0	7.19	1006.5	90.76	0
2019-01-04 00:45:00	0	0	0	7.64	990.68	95.18	0
2019-01-04 01:00:00	0	0	0	8.68	987.2	96.02	0
2019-01-04 01:15:00	0	0	0	7.12	957.56	96.2	0
2019-01-04 01:30:00	0	0	0	7.91	963.24	100	0
2019-01-04 01:45:00	0	0	0	8.08	960.29	93.03	0
2019-01-04 02:00:00	0	0	0	8.33	930.19	97.22	0
2019-01-04 02:15:00	0	0	0	8.18	933.47	90.51	0
2019-01-04 02:30:00	0	0	0	7.49	985.24	99.6	0
2019-01-04 02:45:00	0	0	0	7.89	950.01	100	0
2019-01-04 03:00:00	0	0	0	7.34	982.02	90.78	0
2019-01-04 03:15:00	0	0	0	7.14	962.23	92.52	0
2019-01-04 03:30:00	0	0	0	7.84	999.55	95.54	0
2019-01-04 03:45:00	0	0	0	8.48	976.52	100	0
2019-01-04 04:00:00	0	0	0	8.21	946.35	100	0
2019-01-04 04:15:00	0	0	0	7.88	977.64	98.43	0
2019-01-04 04:30:00	0	0	0	8.01	994.15	100	0
2019-01-04 04:45:00	0	0	0	7.96	1016.69	100	0
2019-01-04 05:00:00	0	0	0	7.3	992.11	100	0
2019-01-04 05:15:00	0	0	0	9.17	1019.18	100	0
2019-01-04 05:30:00	0	0	0	7.4	998.57	100	0
2019-01-04 05:45:00	0	0	0	8.74	962.59	100	0
2019-01-04 06:00:00	0	0	0	8.17	1012.51	93.81	0
2019-01-04 06:15:00	0	0	0	8.87	1018.52	100	0
2019-01-04 06:30:00	0	0	0	8.18	1000.61	95.16	0
2019-01-04 06:45:00	0	0	0	8.68	942.25	92.19	0
2019-01-04 07:00:00	0	0	0	9.66	1021.71	100	0
2019-01-04 07:15:00	14.49	12.61	1.88	10.31	1016.95	99.14	0.41
2019-01-04 07:30:00	23.07	20.07	3	9.96	1022.26	100	0.79
2019-01-04 07:45:00	37.81	32.89	4.91	10.42	944.9	95.87	1.11
2019-01-04 08:00:00	49.88	43.4	6.48	10.79	998.18	99.29	1.46
2019-01-04 08:15:00	52.28	45.48	6.8	10.45	1023.26	100	1.68
2019-01-04 08:30:00	64.98	56.53	8.45	9.77	1015.64	100	1.73
2019-01-04 08:45:00	77.79	67.67	10.11	9.52	969.53	97.53	2.16
2019-01-04 09:00:00	89.64	77.99	11.65	11.27	993.53	100	2.28
2019-01-04 09:15:00	81.76	71.13	10.63	11.08	972.68	100	2.36
2019-01-04 09:30:00	96.96	84.36	12.61	10.72	1022.47	100	2.86
2019-01-04 09:45:00	91.22	79.36	11.86	11.08	1004.89	100	2.97
2019-01-04 10:00:00	107.01	93.1	13.91	13.3	991.16	100	2.91
2019-01-04 10:15:00	114.25	99.4	14.85	13.71	947.74	92.07	3.4
2019-01-04 10:30:00	137.68	119.78	17.9	12.13	942.08	100	3.77
2019-01-04 10:45:00	143.29	124.67	18.63	13.64	1007.28	100	4.16
2019-01-04 11:00:00	135.25	117.66	17.58	14.31	1019.3	98.31	3.69
2019-01-04 11:15:00	163.49	142.24	21.25	13.79	984.11	100	3.88
2019-01-04 11:30:00	143.64	124.96	18.67	13.24	966.23	97.91	4.07
2019-01-04 11:45:00	172.41	149.99	22.41	13.7	1004.29	90.55	4.45
2019-01-04 12:00:00	160.42	139.56	20.85	13.67	935.12	98.16	5.18
2019-01-04 12:15:00	150.95	131.32	19.62	14.84	945.61	100	5.01
2019-01-04 12:30:00	175.45	152.64	22.81	12.83	972.84	97.75	4.69
2019-01-04 12:45:00	163.19	141.97	21.21	13.58	1017.17	89.39	4.98
2019-01-04 13:00:00	167.63	145.84	21.79	12.39	953.05	99.2	5.8
2019-01-04 13:15:00	169.97	147.87	22.1	14.21	990.16	100	5.85
2019-01-04 13:30:00	173.88	151.28	22.6	13.15	959.28	90.73	4.73
2019-01-04 13:45:00	175.64	152.8	22.83	12.63	982.7	100	4.58
2019-01-04 14:00:00	163.93	142.62	21.31	12.27	947.52	100	5.28
2019-01-04 14:15:00	169.92	147.83	22.09	13.63	988.42	100	4.77
2019-01-04 14:30:00	154.31	134.25	20.06	13.37	1004.78	100	4.53
2019-01-04 14:45:00	147.84	128.62	19.22	13.17	958.58	98.15	3.96
2019-01-04 15:00:00	154.2	134.15	20.05	15.34	1007.2	100	4.13
2019-01-04 15:15:00	153.73	133.75	19.99	15.4	937.16	100	3.66
2019-01-04 15:30:00	119.65	104.1	15.55	13.58	1007.95	93.8	3.87
2019-01-04 15:45:00	113.99	99.17	14.82	12.52	963.82	90.16	3.14
2019-01-04 16:00:00	98.28	85.5	12.78	14.61	942.92	100	2.55
2019-01-04 16:15:00	77.98	67.84	10.14	13.34	998.25	97.93	2.39
2019-01-04 16:30:00	52.3	45.5	6.8	13.88	933.05	100	1.27
2019-01-04 16:45:00	27.82	24.2	3.62	15.02	1019	100	0.79
2019-01-04 17:00:00	0	0	0	14.16	979.32	100	0
2019-01-04 17:15:00	0	0	0	15.14	972.05	100	0
2019-01-04 17:30:00	0	0	0	14.89	977.04	100	0
2019-01-04 17:45:00	0	0	0	14.51	995.7	92.56	0
2019-01-04 18:00:00	0	0	0	13.94	932	100	0
2019-01-04 18:15:00	0	0	0	14.42	996.63	100	0
2019-01-04 18:30:00	0	0	0	13.58	941.92	100	0
2019-01-04 18:45:00	0	0	0	11.78	925.36	100	0
2019-01-04 19:00:00	0	0	0	12.53	974.91	100	0
2019-01-04 19:15:00	0	0	0	11.12	974.08	100	0
2019-01-04 19:30:00	0	0	0	11.84	996.52	100	0
2019-01-04 19:45:00	0	0	0	12.37	998.16	97.84	0
2019-01-04 20:00:00	0	0	0	11.16	984.83	100	0
2019-01-04 20:15:00	0	0	0	11.47	970.06	100	0
2019-01-04 20:30:00	0	0	0	12.67	976.76	100	0
2019-01-04 20:45:00	0	0	0	10.96	999.32	100	0
2019-01-04 21:00:00	0	0	0	10.95	987.15	94.69	0
2019-01-04 21:15:00	0	0	0	11.62	998.71	100	0
2019-01-04 21:30:00	0	0	0	11.5	943.96	100	0
2019-01-04 21:45:00	0	0	0	12.19	1015.03	95.55	0
2019-01-04 22:00:00	0	0	0	11.74	1020.57	100	0
2019-01-04 22:15:00	0	0	0	12.51	960.86	100	0
2019-01-04 22:30:00	0	0	0	11.85	960.45	100	0
2019-01-04 22:45:00	0	0	0	12.02	1016.29	100	0
2019-01-04 23:00:00	0	0	0	10.48	926.63	95.13	0
2019-01-04 23:15:00	0	0	0	12.59	952.76	100	0
2019-01-04 23:30:00	0	0	0	12.16	1006.94	100	0
2019-01-04 23:45:00	0	0	0	11.61	984.26	99.83	0
2019-01-05	0	0	0	11.65	935	97.34	0
2019-01-05 00:15:00	0	0	0	9.63	947.23	89.33	0
2019-01-05 00:30:00	0	0	0	11.23	1008.04	98.52	0
2019-01-05 00:45:00	0	0	0	11.66	964.67	100	0
2019-01-05 01:00:00	0	0	0	9.72	916.7	98.41	0
2019-01-05 01:15:00	0	0	0	9.49	940.18	94.68	0
2019-01-05 01:30:00	0	0	0	10.96	955.41	100	0
2019-01-05 01:45:00	0	0	0	11.43	996.65	100	0
2019-01-05 02:00:00	0	0	0	11.47	1010.48	92.76	0
2019-01-05 02:15:00	0	0	0	10.27	928.5	95.95	0
2019-01-05 02:30:00	0	0	0	10.28	988.86	94.82	0
2019-01-05 02:45:00	0	0	0	9.42	937.81	100	0
2019-01-05 03:00:00	0	0	0	10.04	944.67	95.91	0
2019-01-05 03:15:00	0	0	0	9.28	919.67	99.47	0
2019-01-05 03:30:00	0	0	0	10.17	1011.13	92.96	0
2019-01-05 03:45:00	0	0	0	11.15	923.73	100	0
2019-01-05 04:00:00	0	0	0	10.87	933.46	95.07	0
2019-01-05 04:15:00	0	0	0	11.36	968.68	94.41	0
2019-01-05 04:30:00	0	0	0	10.29	917.78	99.54	0
2019-01-05 04:45:00	0	0	0	11.32	976.68	100	0
2019-01-05 05:00:00	0	0	0	8.88	934.54	94.5	0
2019-01-05 05:15:00	0	0	0	10.46	928.67	94.78	0
2019-01-05 05:30:00	0	0	0	10.21	944.63	98.19	0
2019-01-05 05:45:00	0	0	0	9.88	961.89	88.44	0
2019-01-05 06:00:00	0	0	0	10.09	958.78	95.16	0
2019-01-05 06:15:00	0	0	0	10.18	997.41	100	0
2019-01-05 06:30:00	0	0	0	10.26	955.82	99.67	0
2019-01-05 06:45:00	0	0	0	10.56	927.39	87.44	0
2019-01-05 07:00:00	0	0	0	10.66	966.93	89.73	0
2019-01-05 07:15:00	0	0	0	9.52	953.24	100	0
2019-01-05 07:30:00	0	0	0	10.52	996.09	100	0
2019-01-05 07:45:00	19.74	17.17	2.57	9.83	994.56	100	0.74
2019-01-05 08:00:00	27.29	23.74	3.55	11.03	985.19	88.65	1.08
2019-01-05 08:15:00	40.46	35.2	5.26	10.85	964.86	93.04	1.65
2019-01-05 08:30:00	48.17	41.9	6.26	9.98	969.9	94.25	2.09
2019-01-05 08:45:00	61.11	53.17	7.94	10.75	995.43	100	2.27
2019-01-05 09:00:00	78.32	68.14	10.18	10.74	982.07	100	2.41
2019-01-05 09:15:00	85.46	74.35	11.11	9.99	1007.34	88.79	3.27
2019-01-05 09:30:00	97.68	84.98	12.7	9.85	971.65	97.3	2.93
2019-01-05 09:45:00	82.96	72.17	10.78	12.13	999.38	92.21	2.84
2019-01-05 10:00:00	94.67	82.36	12.31	10.61	929.04	100	3.34
2019-01-05 10:15:00	85.09	74.02	11.06	11.35	994.82	100	3.51
2019-01-05 10:30:00	89.94	78.25	11.69	11.27	926.54	91.86	3.24
2019-01-05 10:45:00	90.17	78.45	11.72	11.54	1009.91	95.35	3.23
2019-01-05 11:00:00	83.69	72.81	10.88	10.98	967.29	91.38	3.09
2019-01-05 11:15:00	94.98	82.63	12.35	12.07	987.7	100	3.28
2019-01-05 11:30:00	85.34	74.24	11.09	12.1	981.68	100	3.43
2019-01-05 11:45:00	89.72	78.06	11.66	12.12	924.52	100	3.2
2019-01-05 12:00:00	91.07	79.23	11.84	10.71	1008.52	90.24	3.69
2019-01-05 12:15:00	105.04	91.39	13.66	12.74	978.65	89.12	3.07
2019-01-05 12:30:00	103.34	89.9	13.43	12.73	985.79	89.69	2.97
2019-01-05 12:45:00	96.25	83.74	12.51	11.51	948.56	100	3.44
2019-01-05 13:00:00	92.77	80.71	12.06	11.04	993.92	88.65	3.36
2019-01-05 13:15:00	84.14	73.2	10.94	12.39	974.67	100	3.08
2019-01-05 13:30:00	86.1	74.91	11.19	12.41	926.2	99.42	3.53
2019-01-05 13:45:00	91.27	79.4	11.86	10.93	934.3	87.47	3.22
2019-01-05 14:00:00	80.54	70.07	10.47	9.77	959.49	98.08	3.17
2019-01-05 14:15:00	84.04	73.11	10.92	11.49	921.57	92.49	2.98
2019-01-05 14:30:00	86.22	75.01	11.21	10.23	987.69	99.92	2.89
2019-01-05 14:45:00	74.42	64.75	9.67	11.98	995.39	100	2.34
2019-01-05 15:00:00	77.03	67.02	10.01	11.39	988.39	100	2.15
2019-01-05 15:15:00	61.2	53.25	7.96	9.72	968.83	100	2.25
2019-01-05 15:30:00	56.84	49.45	7.39	10.73	916.73	89.65	2
2019-01-05 15:45:00	49.16	42.77	6.39	10.12	986.95	98.62	1.86
2019-01-05 16:00:00	39.84	34.66	5.18	12.09	949.29	92.35	1.31
2019-01-05 16:15:00	33.09	28.79	4.3	11.4	935.72	100	1.24
2019-01-05 16:30:00	20.85	18.14	2.71	10.65	965.96	94.42	0.69
2019-01-05 16:45:00	10.68	9.29	1.39	11.12	989.14	95.11	0.45
2019-01-05 17:00:00	0	0	0	10.98	1004.8	89.18	0
2019-01-05 17:15:00	0	0	0	11.87	981.23	93.86	0
2019-01-05 17:30:00	0	0	0	10.83	946.62	100	0
2019-01-05 17:45:00	0	0	0	10.47	979.52	88.89	0
2019-01-05 18:00:00	0	0	0	11.15	983.52	100	0
2019-01-05 18:15:00	0	0	0	10.42	921.09	94.29	0
2019-01-05 18:30:00	0	0	0	9.86	1007.7	89.18	0
2019-01-05 18:45:00	0	0	0	9.87	946.08	90.11	0
2019-01-05 19:00:00	0	0	0	9.45	943.13	89.88	0
2019-01-05 19:15:00	0	0	0	10.63	980.11	100	0
2019-01-05 19:30:00	0	0	0	11.17	987.31	98.69	0
2019-01-05 19:45:00	0	0	0	9	951.7	100	0
2019-01-05 20:00:00	0	0	0	9.76	983.35	92.43	0
2019-01-05 20:15:00	0	0	0	10.21	954.27	97.33	0
2019-01-05 20:30:00	0	0	0	9.46	932.05	100	0
2019-01-05 20:45:00	0	0	0	10.87	979.22	97.98	0
2019-01-05 21:00:00	0	0	0	10.17	997.4	99.62	0
2019-01-05 21:15:00	0	0	0	9.78	1012.58	92.51	0
2019-01-05 21:30:00	0	0	0	9.22	1014.25	100	0
2019-01-05 21:45:00	0	0	0	10.95	942.93	91.83	0
2019-01-05 22:00:00	0	0	0	9.94	929.2	100	0
2019-01-05 22:15:00	0	0	0	9.83	975.48	100	0
2019-01-05 22:30:00	0	0	0	10.22	977.32	100	0
2019-01-05 22:45:00	0	0	0	10.26	932.12	100	0
2019-01-05 23:00:00	0	0	0	9.24	992.29	100	0
2019-01-05 23:15:00	0	0	0	9.32	1010.32	95.61	0
2019-01-05 23:30:00	0	0	0	9.76	944.96	94.54	0
2019-01-05 23:45:00	0	0	0	9.76	972.76	94.46	0
2019-01-06	0	0	0	9.27	959.06	99.59	0
2019-01-06 00:15:00	0	0	0	8.83	981.01	93.19	0
2019-01-06 00:30:00	0	0	0	7.72	961.85	100	0
2019-01-06 00:45:00	0	0	0	9.19	990.89	93.21	0
2019-01-06 01:00:00	0	0	0	8.71	925.02	88.55	0
2019-01-06 01:15:00	0	0	0	8.74	901.7	94.8	0
2019-01-06 01:30:00	0	0	0	8.91	980.15	92.71	0
2019-01-06 01:45:00	0	0	0	7.31	930.65	100	0
2019-01-06 02:00:00	0	0	0	7.75	901.37	88.27	0
2019-01-06 02:15:00	0	0	0	7.81	944.49	100	0
2019-01-06 02:30:00	0	0	0	7.28	937.44	87.99	0
2019-01-06 02:45:00	0	0	0	6.69	969.14	100	0
2019-01-06 03:00:00	0	0	0	8.2	914.99	96.21	0
2019-01-06 03:15:00	0	0	0	7.2	957.12	92.21	0
2019-01-06 03:30:00	0	0	0	6.49	922.93	97.1	0
2019-01-06 03:45:00	0	0	0	6.37	933.67	93.07	0
2019-01-06 04:00:00	0	0	0	6.6	931.35	100	0
2019-01-06 04:15:00	0	0	0	7.09	911.59	99.52	0
2019-01-06 04:30:00	0	0	0	5.99	974.79	100	0
2019-01-06 04:45:00	0	0	0	6.72	937.64	100	0
2019-01-06 05:00:00	0	0	0	6.56	983.01	91.01	0
2019-01-06 05:15:00	0	0	0	6.56	991.67	100	0
2019-01-06 05:30:00	0	0	0	7.09	970.44	100	0
2019-01-06 05:45:00	0	0	0	6.75	949.3	100	0
2019-01-06 06:00:00	0	0	0	6.63	968.07	97.7	0
2019-01-06 06:15:00	0	0	0	7.34	954.78	100	0
2019-01-06 06:30:00	0	0	0	7.66	923.86	94.6	0
2019-01-06 06:45:00	0	0	0	6.58	951.48	100	0
2019-01-06 07:00:00	0	0	0	6.6	988.16	89.89	0
2019-01-06 07:15:00	18.35	15.96	2.39	7.76	968.84	100	0.53
2019-01-06 07:30:00	42.19	36.71	5.48	7.2	904.72	89.81	1.22
2019-01-06 07:45:00	65.76	57.21	8.55	8.36	964.04	97.75	2.27
2019-01-06 08:00:00	90.5	78.74	11.77	8.67	935.08	89.18	2.8
2019-01-06 08:15:00	142.77	124.21	18.56	7.3	982.35	92.08	4.35
2019-01-06 08:30:00	186.91	162.61	24.3	8.28	946.33	100	5.5
2019-01-06 08:45:00	221.51	192.72	28.8	8.98	906.89	89.39	6.19
2019-01-06 09:00:00	241.74	210.31	31.43	8.3	958.43	91.87	7.61
2019-01-06 09:15:00	267.26	232.51	34.74	9.78	914.64	81.56	8.88
2019-01-06 09:30:00	329.13	286.34	42.79	10.92	970.23	82.52	8.13
2019-01-06 09:45:00	339.48	295.35	44.13	11.24	952.36	77.34	9.24
2019-01-06 10:00:00	377.24	328.19	49.04	11.43	953.72	87.03	9.34
2019-01-06 10:15:00	331.29	288.22	43.07	10.76	921.27	79.13	9.56
2019-01-06 10:30:00	417.93	363.6	54.33	11.89	994.12	81	11.93
2019-01-06 10:45:00	383.11	333.31	49.8	14.15	915.92	76.27	11.54
2019-01-06 11:00:00	402.12	349.84	52.28	12.45	967.22	86.06	13.43
2019-01-06 11:15:00	402.89	350.52	52.38	13.86	913.1	80.32	12.08
2019-01-06 11:30:00	450.7	392.11	58.59	14.9	907.07	77.01	14.43
2019-01-06 11:45:00	466.64	405.98	60.66	13.77	963.14	80.86	15.59
2019-01-06 12:00:00	475.76	413.91	61.85	16.65	956.38	69.49	13.98
2019-01-06 12:15:00	459.27	399.56	59.71	16.12	973.6	64.43	16.01
2019-01-06 12:30:00	514.64	447.73	66.9	17.21	905.87	69.63	15.1
2019-01-06 12:45:00	451.54	392.84	58.7	14.68	916.53	64.43	15.84
2019-01-06 13:00:00	467.81	407	60.82	16.82	924.14	66.59	14.05
2019-01-06 13:15:00	555.34	483.14	72.19	16.28	992.55	67.62	15.32
2019-01-06 13:30:00	471.23	409.97	61.26	15.59	968.23	74.44	14.64
2019-01-06 13:45:00	493.85	429.65	64.2	18.29	958.08	62.57	14.07
2019-01-06 14:00:00	493.47	429.32	64.15	16.92	943.56	66.91	13.48
2019-01-06 14:15:00	438.78	381.74	57.04	18.49	986.17	65.24	12.7
2019-01-06 14:30:00	445.44	387.53	57.91	18.55	921.45	66.05	14.01
2019-01-06 14:45:00	380	330.6	49.4	16.44	908.36	64.55	11.18
2019-01-06 15:00:00	318.69	277.26	41.43	17.8	965.35	71.64	9.42
2019-01-06 15:15:00	299.97	260.97	39	16.31	902.56	75.57	9.33
2019-01-06 15:30:00	304	264.48	39.52	13.84	978.85	70.35	8.48
2019-01-06 15:45:00	222.54	193.61	28.93	15.79	986.35	72.62	6.7
2019-01-06 16:00:00	220.56	191.88	28.67	15.38	969.42	69.51	5.63
2019-01-06 16:15:00	159.08	138.4	20.68	12.97	907.42	69.13	4.55
2019-01-06 16:30:00	99.24	86.34	12.9	12.6	969.13	80.26	3.09
2019-01-06 16:45:00	59.72	51.96	7.76	13.74	963.99	70.15	1.67
2019-01-06 17:00:00	25.48	22.17	3.31	12.8	976.98	74.65	0.67
2019-01-06 17:15:00	0	0	0	12.11	929.31	75.9	0
2019-01-06 17:30:00	0	0	0	11.69	905.17	81.8	0
2019-01-06 17:45:00	0	0	0	11.49	987.34	82.13	0
2019-01-06 18:00:00	0	0	0	10.75	976.19	73.02	0
2019-01-06 18:15:00	0	0	0	12.8	931.93	76.71	0
2019-01-06 18:30:00	0	0	0	11.63	954.26	81.81	0
2019-01-06 18:45:00	0	0	0	12.18	904.24	86.55	0
2019-01-06 19:00:00	0	0	0	10.47	944.68	90.51	0
2019-01-06 19:15:00	0	0	0	11.34	947.17	81.16	0
2019-01-06 19:30:00	0	0	0	11.36	946.4	81.6	0
2019-01-06 19:45:00	0	0	0	11.23	956.11	81.51	0
2019-01-06 20:00:00	0	0	0	11.08	984.08	95.41	0
2019-01-06 20:15:00	0	0	0	9.4	936.14	79.13	0
2019-01-06 20:30:00	0	0	0	9.27	924.37	87.7	0
2019-01-06 20:45:00	0	0	0	10.51	954.98	90.58	0
2019-01-06 21:00:00	0	0	0	10.54	935.09	89.02	0
2019-01-06 21:15:00	0	0	0	9.43	918.76	97.43	0
2019-01-06 21:30:00	0	0	0	10.1	958.66	78.64	0
2019-01-06 21:45:00	0	0	0	11.04	974.26	90.49	0
2019-01-06 22:00:00	0	0	0	11.19	985.84	96.17	0
2019-01-06 22:15:00	0	0	0	10.52	984.75	82.04	0
2019-01-06 22:30:00	0	0	0	9.84	904.79	82.9	0
2019-01-06 22:45:00	0	0	0	9.57	935.29	94.89	0
2019-01-06 23:00:00	0	0	0	9.63	944.05	81.3	0
2019-01-06 23:15:00	0	0	0	10.87	943.37	83.05	0
2019-01-06 23:30:00	0	0	0	8.94	973.7	90.85	0
2019-01-06 23:45:00	0	0	0	11.04	958.85	88.9	0
2019-01-07	0	0	0	8.81	978.23	81.7	0
2019-01-07 00:15:00	0	0	0	9.18	970.94	78.83	0
2019-01-07 00:30:00	0	0	0	7.63	997.14	72.74	0
2019-01-07 00:45:00	0	0	0	8.65	997.64	71.63	0
2019-01-07 01:00:00	0	0	0	8.14	970.99	72.15	0
2019-01-07 01:15:00	0	0	0	7.4	925.28	84.47	0
2019-01-07 01:30:00	0	0	0	9.19	932.8	73	0
2019-01-07 01:45:00	0	0	0	7.91	978.38	82.38	0
2019-01-07 02:00:00	0	0	0	8.92	971.17	77.55	0
2019-01-07 02:15:00	0	0	0	8.58	935.78	85.95	0
2019-01-07 02:30:00	0	0	0	7.67	986.87	71.49	0
2019-01-07 02:45:00	0	0	0	7.36	970.66	80.75	0
2019-01-07 03:00:00	0	0	0	9.26	1003.96	78.95	0
2019-01-07 03:15:00	0	0	0	7.95	948.16	75.85	0
2019-01-07 03:30:00	0	0	0	8.95	956.55	77	0
2019-01-07 03:45:00	0	0	0	7.74	938.95	77.55	0
2019-01-07 04:00:00	0	0	0	8.37	1018.34	83.02	0
2019-01-07 04:15:00	0	0	0	8.59	925.81	78.31	0
2019-01-07 04:30:00	0	0	0	9.42	955.07	72.74	0
2019-01-07 04:45:00	0	0	0	7.69	957.25	76.31	0
2019-01-07 05:00:00	0	0	0	9.64	1010.23	71.81	0
2019-01-07 05:15:00	0	0	0	8.71	1010.46	80.23	0
2019-01-07 05:30:00	0	0	0	8.64	982.48	77.51	0
2019-01-07 05:45:00	0	0	0	8.29	938.05	75.28	0
2019-01-07 06:00:00	0	0	0	8.29	950.1	81.67	0
2019-01-07 06:15:00	0	0	0	9.73	1004.98	88.51	0
2019-01-07 06:30:00	0	0	0	8.99	958.35	90.42	0
2019-01-07 06:45:00	0	0	0	8.48	1014.08	76.38	0
2019-01-07 07:00:00	0	0	0	8.08	1001.55	75.92	0
2019-01-07 07:15:00	0	0	0	9.04	979.78	79.08	0
2019-01-07 07:30:00	9.68	8.42	1.26	9.24	955.4	79.73	0.41
2019-01-07 07:45:00	16.44	14.3	2.14	9.18	987.11	85	0.63
2019-01-07 08:00:00	25.8	22.44	3.35	8.17	996.34	91.73	0.92
2019-01-07 08:15:00	32.43	28.22	4.22	7.87	991.86	88.7	1.56
2019-01-07 08:30:00	42.9	37.32	5.58	9.01	965.29	90.57	1.8
2019-01-07 08:45:00	61.12	53.17	7.95	9.73	928.71	79.33	2.46
2019-01-07 09:00:00	63.23	55.01	8.22	10.24	1004.4	90.16	2.49
2019-01-07 09:15:00	66.21	57.61	8.61	10.07	979.6	91.8	2.79
2019-01-07 09:30:00	81.18	70.63	10.55	9.23	994.9	82.44	3.37
2019-01-07 09:45:00	88.54	77.03	11.51	10.18	936.6	80.82	3.27
2019-01-07 10:00:00	76.45	66.51	9.94	10.64	947.32	92.4	3.31
2019-01-07 10:15:00	82.1	71.43	10.67	10.45	967.22	81.67	3.35
2019-01-07 10:30:00	84.59	73.6	11	10.57	926.78	88.52	3.9
2019-01-07 10:45:00	84.57	73.57	10.99	10.03	1017.35	87.32	3.89
2019-01-07 11:00:00	95.35	82.96	12.4	11.51	1008.31	80.26	3.99
2019-01-07 11:15:00	102.41	89.1	13.31	9.54	935.84	77.24	3.43
2019-01-07 11:30:00	97.96	85.23	12.74	11.37	995.26	92.26	4.45
2019-01-07 11:45:00	105.95	92.17	13.77	9.82	927.97	83.23	4.05
2019-01-07 12:00:00	109.15	94.96	14.19	10.72	925.75	80.65	3.95
2019-01-07 12:15:00	106.57	92.71	13.85	12.27	980.56	84.47	3.81
2019-01-07 12:30:00	107.83	93.81	14.02	10.43	1014.98	80.28	4.52
2019-01-07 12:45:00	102.65	89.31	13.35	10.5	1017.26	88.73	3.84
2019-01-07 13:00:00	100.23	87.2	13.03	10.57	983.74	82.38	4.22
2019-01-07 13:15:00	115.2	100.22	14.98	12.06	928.38	89.49	4.35
2019-01-07 13:30:00	109.09	94.91	14.18	11.96	1007	85.18	4.56
2019-01-07 13:45:00	105.43	91.72	13.71	11.79	1015.79	92.08	3.91
2019-01-07 14:00:00	104.78	91.16	13.62	12.84	944.44	89.31	4.38
2019-01-07 14:15:00	93.57	81.41	12.16	11.23	968.93	89.21	3.55
2019-01-07 14:30:00	88.1	76.65	11.45	10.55	979.75	89.73	3.29
2019-01-07 14:45:00	79.62	69.27	10.35	11.17	932.03	91.63	3.37
2019-01-07 15:00:00	77	66.99	10.01	10.82	946.41	89.19	3.16
2019-01-07 15:15:00	68.42	59.52	8.89	13.01	967.93	90.74	2.48
2019-01-07 15:30:00	62.34	54.24	8.1	12.96	961.25	97.19	2.49
2019-01-07 15:45:00	52.11	45.33	6.77	11.75	967.13	95	2.16
2019-01-07 16:00:00	40.31	35.07	5.24	10.68	1019.48	94.48	1.8
2019-01-07 16:15:00	33.12	28.82	4.31	10.45	964.54	80.69	1.23
2019-01-07 16:30:00	18.51	16.1	2.41	12.11	955.18	97.09	0.88
2019-01-07 16:45:00	12.42	10.81	1.61	10.25	1003.48	99.88	0.48
2019-01-07 17:00:00	0	0	0	11.3	941.44	81.05	0
2019-01-07 17:15:00	0	0	0	11.23	954.81	88.86	0
2019-01-07 17:30:00	0	0	0	12.21	1009.83	91.21	0
2019-01-07 17:45:00	0	0	0	10.21	1007.07	85.37	0
2019-01-07 18:00:00	0	0	0	11.5	1011.22	91.16	0
2019-01-07 18:15:00	0	0	0	9.45	967.56	87.23	0
2019-01-07 18:30:00	0	0	0	10.66	994.12	84.87	0
2019-01-07 18:45:00	0	0	0	10.11	953.98	82.94	0
2019-01-07 19:00:00	0	0	0	10.34	997.09	94.3	0
2019-01-07 19:15:00	0	0	0	10.63	964.49	99.66	0
2019-01-07 19:30:00	0	0	0	9.82	979.92	95.59	0
2019-01-07 19:45:00	0	0	0	11.24	1017.91	83.85	0
2019-01-07 20:00:00	0	0	0	10.16	957.64	86.49	0
2019-01-07 20:15:00	0	0	0	9.53	978.33	89.12	0
2019-01-07 20:30:00	0	0	0	11.02	1008.32	82.13	0
2019-01-07 20:45:00	0	0	0	8.95	987.64	81.68	0
2019-01-07 21:00:00	0	0	0	9.17	936.04	98.09	0
2019-01-07 21:15:00	0	0	0	9.54	960.63	86.1	0
2019-01-07 21:30:00	0	0	0	8.96	1014.01	92.45	0
2019-01-07 21:45:00	0	0	0	9.3	944.02	88.52	0
2019-01-07 22:00:00	0	0	0	10.83	965.89	99.37	0
2019-01-07 22:15:00	0	0	0	9.67	994.25	92.79	0
2019-01-07 22:30:00	0	0	0	9.17	973.24	84.81	0
2019-01-07 22:45:00	0	0	0	9.36	964.59	80.2	0
2019-01-07 23:00:00	0	0	0	10.82	1016.71	99.16	0
2019-01-07 23:15:00	0	0	0	9.69	957.97	94.89	0
2019-01-07 23:30:00	0	0	0	10.71	990.87	85.4	0
2019-01-07 23:45:00	0	0	0	9.64	1010.38	93.73	0
2019-01-08	0	0	0	10.6	987.97	86.2	0
2019-01-08 00:15:00	0	0	0	9.8	1011.27	100	0
2019-01-08 00:30:00	0	0	0	10.03	1001.8	100	0
2019-01-08 00:45:00	0	0	0	9.44	939.39	92.03	0
2019-01-08 01:00:00	0	0	0	9.47	940.44	88.56	0
2019-01-08 01:15:00	0	0	0	8.3	983.96	100	0
2019-01-08 01:30:00	0	0	0	8.52	1006.76	89.88	0
2019-01-08 01:45:00	0	0	0	9.24	941.86	99.62	0
2019-01-08 02:00:00	0	0	0	8.12	950.62	95.34	0
2019-01-08 02:15:00	0	0	0	8.84	934.97	89.72	0
2019-01-08 02:30:00	0	0	0	8.65	1005.62	91.93	0
2019-01-08 02:45:00	0	0	0	9.56	1005.53	90.69	0
2019-01-08 03:00:00	0	0	0	8.77	990.95	94.53	0
2019-01-08 03:15:00	0	0	0	8.88	979.57	94.76	0
2019-01-08 03:30:00	0	0	0	9.28	927.32	93.75	0
2019-01-08 03:45:00	0	0	0	7.78	986.22	100	0
2019-01-08 04:00:00	0	0	0	9.74	923.99	100	0
2019-01-08 04:15:00	0	0	0	8.76	973.54	85.49	0
2019-01-08 04:30:00	0	0	0	8.84	934.63	99.27	0
2019-01-08 04:45:00	0	0	0	7.94	987.95	85.97	0
2019-01-08 05:00:00	0	0	0	8.85	998.06	88.88	0
2019-01-08 05:15:00	0	0	0	8.17	918.66	94.52	0
2019-01-08 05:30:00	0	0	0	8.41	975.04	88.13	0
2019-01-08 05:45:00	0	0	0	7.91	1008.13	98.17	0
2019-01-08 06:00:00	0	0	0	8.74	997.34	100	0
2019-01-08 06:15:00	0	0	0	8.4	978.57	82.51	0
2019-01-08 06:30:00	0	0	0	7.75	948.48	87.18	0
2019-01-08 06:45:00	0	0	0	8.07	926.72	84.01	0
2019-01-08 07:00:00	0	0	0	9.34	1003.29	91.11	0
2019-01-08 07:15:00	11.96	10.4	1.55	9.77	999.52	100	0.36
2019-01-08 07:30:00	26.4	22.97	3.43	8.68	982.06	90.54	0.73
2019-01-08 07:45:00	44.51	38.72	5.79	8.82	986.94	98.54	1.4
2019-01-08 08:00:00	75.83	65.97	9.86	9.17	964.01	90.07	2.08
2019-01-08 08:15:00	90.85	79.04	11.81	9.46	979.4	89.97	3.02
2019-01-08 08:30:00	125.48	109.17	16.31	8.84	981.62	86.99	4.04
2019-01-08 08:45:00	134.47	116.99	17.48	9.44	951.63	90.2	4.03
2019-01-08 09:00:00	191.41	166.52	24.88	9.37	949.39	93.82	5.15
2019-01-08 09:15:00	190.32	165.58	24.74	9.55	933.69	81.53	5.33
2019-01-08 09:30:00	235.17	204.6	30.57	11.04	975.64	87.03	6.2
2019-01-08 09:45:00	244.85	213.02	31.83	9.13	962.09	81.01	6.5
2019-01-08 10:00:00	238.36	207.38	30.99	10.17	944.76	91.77	6.49
2019-01-08 10:15:00	268.72	233.79	34.93	12.34	928.79	80.7	7.1
2019-01-08 10:30:00	273.9	238.3	35.61	11.46	1000.03	83.35	8.23
2019-01-08 10:45:00	284.91	247.88	37.04	10.51	1004.42	88.52	7.98
2019-01-08 11:00:00	265.33	230.84	34.49	12.31	929.62	75.64	7.94
2019-01-08 11:15:00	299.67	260.72	38.96	11.52	992.71	84.35	9.04
2019-01-08 11:30:00	320.63	278.95	41.68	12.76	1012.44	88.06	8.6
2019-01-08 11:45:00	276.83	240.84	35.99	12.79	1009.45	81.55	7.97
2019-01-08 12:00:00	331.75	288.62	43.13	13.38	973.29	81.52	8.18
2019-01-08 12:15:00	301.45	262.26	39.19	11.6	957.22	74.14	10.14
2019-01-08 12:30:00	356.27	309.96	46.32	14.06	948.54	70.99	10.5
2019-01-08 12:45:00	323.69	281.61	42.08	14.67	972.3	77.2	10.41
2019-01-08 13:00:00	349.94	304.44	45.49	14.68	956.86	67.9	10.76
2019-01-08 13:15:00	355.68	309.44	46.24	14.82	958.7	72.57	9.15
2019-01-08 13:30:00	333.79	290.4	43.39	15.67	954.15	76.6	8.46
2019-01-08 13:45:00	307.8	267.79	40.01	13.55	1007.41	78.18	9.06
2019-01-08 14:00:00	256.92	223.52	33.4	13.62	1005.93	64.69	8.8
2019-01-08 14:15:00	281.15	244.6	36.55	14.01	919.15	71.05	7.98
2019-01-08 14:30:00	219.91	191.32	28.59	15.5	938.18	76.94	7.08
2019-01-08 14:45:00	191.66	166.75	24.92	15.19	993.5	65.02	6.43
2019-01-08 15:00:00	150.11	130.6	19.51	12.58	972.34	68.99	5.39
2019-01-08 15:15:00	149.81	130.34	19.48	14.1	991.52	75.69	3.72
2019-01-08 15:30:00	103.9	90.39	13.51	14.43	937.13	69.44	3.25
2019-01-08 15:45:00	89.5	77.87	11.64	12.95	960.56	75.73	2.87
2019-01-08 16:00:00	77.92	67.79	10.13	13.9	979.55	76.89	2.27
2019-01-08 16:15:00	48.86	42.51	6.35	13.06	964.01	82.16	1.74
2019-01-08 16:30:00	35.39	30.79	4.6	12.69	992.18	71.24	1.14
2019-01-08 16:45:00	18.59	16.17	2.42	11.1	941.99	69.78	0.53
2019-01-08 17:00:00	0	0	0	12.07	989.99	78.98	0
2019-01-08 17:15:00	0	0	0	11.58	978.18	80.5	0
2019-01-08 17:30:00	0	0	0	12.41	927.35	83.38	0
2019-01-08 17:45:00	0	0	0	11.45	935.46	79.82	0
2019-01-08 18:00:00	0	0	0	11.51	945.94	73.71	0
2019-01-08 18:15:00	0	0	0	11.14	1006.91	72.77	0
2019-01-08 18:30:00	0	0	0	11.64	931.43	85.7	0
2019-01-08 18:45:00	0	0	0	11.17	920.19	76.99	0
2019-01-08 19:00:00	0	0	0	9.17	939.36	87.4	0
2019-01-08 19:15:00	0	0	0	9.75	918.51	84.98	0
2019-01-08 19:30:00	0	0	0	9.01	923.02	87.53	0
2019-01-08 19:45:00	0	0	0	10.4	966.69	84.6	0
2019-01-08 20:00:00	0	0	0	8.98	962.01	73.5	0
2019-01-08 20:15:00	0	0	0	10.83	978.46	75.58	0
2019-01-08 20:30:00	0	0	0	8.66	991.95	78.36	0
2019-01-08 20:45:00	0	0	0	8.81	924.99	78.13	0
2019-01-08 21:00:00	0	0	0	8.89	927.86	86.73	0
2019-01-08 21:15:00	0	0	0	10.7	980.39	73.44	0
2019-01-08 21:30:00	0	0	0	9.57	964.79	75.31	0
2019-01-08 21:45:00	0	0	0	8.99	1010.63	70.66	0
2019-01-08 22:00:00	0	0	0	10.82	991.49	84.06	0
2019-01-08 22:15:00	0	0	0	10.14	921.79	83.16	0
2019-01-08 22:30:00	0	0	0	9.17	942.32	82.14	0
2019-01-08 22:45:00	0	0	0	10.62	952.33	71.01	0
2019-01-08 23:00:00	0	0	0	9.31	975.71	72.3	0
2019-01-08 23:15:00	0	0	0	8.62	973.67	71.43	0
2019-01-08 23:30:00	0	0	0	10.53	986.13	71.38	0
2019-01-08 23:45:00	0	0	0	9.89	944.47	69.63	0
2019-01-09	0	0	0	10.72	961.84	68.94	0
2019-01-09 00:15:00	0	0	0	8.6	1023.72	68.48	0
2019-01-09 00:30:00	0	0	0	8.62	1012.5	60.45	0
2019-01-09 00:45:00	0	0	0	8.14	999.24	61.25	0
2019-01-09 01:00:00	0	0	0	8.93	941.24	73.2	0
2019-01-09 01:15:00	0	0	0	7.87	1004.37	71.08	0
2019-01-09 01:30:00	0	0	0	8.35	990.98	67.25	0
2019-01-09 01:45:00	0	0	0	7.76	978.92	68.63	0
2019-01-09 02:00:00	0	0	0	7.41	932.96	68.22	0
2019-01-09 02:15:00	0	0	0	8.45	973.54	73.48	0
2019-01-09 02:30:00	0	0	0	8.66	948.9	68.12	0
2019-01-09 02:45:00	0	0	0	8.05	1024.12	73.59	0
2019-01-09 03:00:00	0	0	0	8.7	951.3	71.87	0
2019-01-09 03:15:00	0	0	0	7.14	962.71	74.47	0
2019-01-09 03:30:00	0	0	0	8.17	988.38	68.08	0
2019-01-09 03:45:00	0	0	0	8.53	958.83	61.96	0
2019-01-09 04:00:00	0	0	0	7.4	1018.58	64.03	0
2019-01-09 04:15:00	0	0	0	8.44	994.1	71.26	0
2019-01-09 04:30:00	0	0	0	8.78	941.83	63.66	0
2019-01-09 04:45:00	0	0	0	7.17	1020.45	65.44	0
2019-01-09 05:00:00	0	0	0	8.02	1023.37	63.34	0
2019-01-09 05:15:00	0	0	0	7.29	960.15	62.08	0
2019-01-09 05:30:00	0	0	0	8.74	996.28	64.47	0
2019-01-09 05:45:00	0	0	0	7.84	990.31	63.61	0
2019-01-09 06:00:00	0	0	0	8.13	949.92	73.39	0
2019-01-09 06:15:00	0	0	0	7.12	956	67.99	0
2019-01-09 06:30:00	0	0	0	8.18	935.05	62.33	0
2019-01-09 06:45:00	0	0	0	7.49	951.41	73.01	0
2019-01-09 07:00:00	0	0	0	7.33	1013.19	62.34	0
2019-01-09 07:15:00	0	0	0	8.4	954.79	68.72	0
2019-01-09 07:30:00	19.02	16.55	2.47	8.23	1024.85	73.15	0.6
2019-01-09 07:45:00	29.55	25.71	3.84	7.77	1022.43	70.21	0.9
2019-01-09 08:00:00	42.97	37.38	5.59	9.31	986.63	75.3	1.39
2019-01-09 08:15:00	57.44	49.98	7.47	7.99	945.13	68.5	1.92
2019-01-09 08:30:00	71.6	62.29	9.31	9.45	1003.34	61.33	2.38
2019-01-09 08:45:00	84.51	73.53	10.99	9	989.46	62.94	3.19
2019-01-09 09:00:00	89.72	78.05	11.66	10.31	1012.82	67.17	3.44
2019-01-09 09:15:00	109.89	95.61	14.29	9.99	965.17	60.95	4.13
2019-01-09 09:30:00	143.22	124.6	18.62	10.8	1022.44	66.04	4.64
2019-01-09 09:45:00	157.61	137.12	20.49	9.62	1010.62	62.47	4.46
2019-01-09 10:00:00	156.05	135.76	20.29	10.71	946.08	61.74	5.95
2019-01-09 10:15:00	152.71	132.86	19.85	12.76	991.72	59.91	6.5
2019-01-09 10:30:00	173.9	151.3	22.61	11.15	982.54	57.31	6.63
2019-01-09 10:45:00	178.2	155.04	23.17	12.33	1008.19	55.49	6.56
2019-01-09 11:00:00	203.33	176.89	26.43	12.33	966.97	57.22	7.16
2019-01-09 11:15:00	229.04	199.26	29.77	12.95	945.9	54.14	7.58
2019-01-09 11:30:00	248.53	216.22	32.31	15.17	964.4	50.26	7.73
2019-01-09 11:45:00	231.8	201.67	30.13	15.66	1005.27	59.05	9.79
2019-01-09 12:00:00	229.04	199.26	29.78	13.15	952.81	55.97	10
2019-01-09 12:15:00	241.66	210.24	31.42	16.89	998.24	56.75	8.75
2019-01-09 12:30:00	288.87	251.32	37.55	16.01	1014.6	51.82	9.89
2019-01-09 12:45:00	261	227.07	33.93	14.31	966.66	50.33	10.62
2019-01-09 13:00:00	262.97	228.78	34.19	17.01	931.32	55.74	11.37
2019-01-09 13:15:00	317.9	276.58	41.33	17.89	925.59	55.27	9.58
2019-01-09 13:30:00	301.4	262.22	39.18	18.82	997.78	48.1	9.98
2019-01-09 13:45:00	286.71	249.43	37.27	17.11	989.05	52.16	10.39
2019-01-09 14:00:00	259.94	226.15	33.79	19.15	1013.43	48.58	10.71
2019-01-09 14:15:00	239.99	208.79	31.2	15.84	972.05	57.64	8.34
2019-01-09 14:30:00	243.98	212.26	31.72	18	926.7	49.29	9.48
2019-01-09 14:45:00	253.06	220.16	32.9	19.22	998.41	50.1	7.9
2019-01-09 15:00:00	185.77	161.62	24.15	18.02	989.72	55.08	7.3
2019-01-09 15:15:00	176.74	153.76	22.98	18.34	939.64	57.52	6.51
2019-01-09 15:30:00	167.61	145.82	21.79	16.38	993.71	54.34	5.67
2019-01-09 15:45:00	162.9	141.73	21.18	15.42	985.46	58.32	5.13
2019-01-09 16:00:00	138.1	120.14	17.95	14.86	1021.76	54.58	4.93
2019-01-09 16:15:00	97.49	84.81	12.67	16.9	945.92	61.47	3.17
2019-01-09 16:30:00	72.91	63.43	9.48	14.94	998.76	53.89	2.4
2019-01-09 16:45:00	40.45	35.19	5.26	16.03	934.92	65.82	1.26
2019-01-09 17:00:00	15.53	13.51	2.02	12.66	1009.62	56.96	0.59
2019-01-09 17:15:00	0	0	0	14.98	934.14	57.13	0
2019-01-09 17:30:00	0	0	0	13.04	946.39	59.69	0
2019-01-09 17:45:00	0	0	0	12.09	930.1	63.47	0
2019-01-09 18:00:00	0	0	0	14.37	942.27	63.57	0
2019-01-09 18:15:00	0	0	0	13.74	958.14	68.25	0
2019-01-09 18:30:00	0	0	0	11.28	1006.37	66.37	0
2019-01-09 18:45:00	0	0	0	11.47	994.48	65.99	0
2019-01-09 19:00:00	0	0	0	12.11	973.16	59.58	0
2019-01-09 19:15:00	0	0	0	10.73	998.01	60.32	0
2019-01-09 19:30:00	0	0	0	9.32	936.79	72.88	0
2019-01-09 19:45:00	0	0	0	10.15	939.44	74.27	0
2019-01-09 20:00:00	0	0	0	10.11	981.88	61.78	0
2019-01-09 20:15:00	0	0	0	10.16	969.59	69.97	0
2019-01-09 20:30:00	0	0	0	8.65	1012.17	78.32	0
2019-01-09 20:45:00	0	0	0	9.81	976.83	68.69	0
2019-01-09 21:00:00	0	0	0	9.44	1014.59	65.27	0
2019-01-09 21:15:00	0	0	0	9.87	986.88	76.85	0
2019-01-09 21:30:00	0	0	0	8.05	1016.93	80.34	0
2019-01-09 21:45:00	0	0	0	8.14	1015.54	74.93	0
2019-01-09 22:00:00	0	0	0	8.77	951.03	80.58	0
2019-01-09 22:15:00	0	0	0	8.49	962.9	67.37	0
2019-01-09 22:30:00	0	0	0	8.82	972.75	82.46	0
2019-01-09 22:45:00	0	0	0	7.4	967.03	81.68	0
2019-01-09 23:00:00	0	0	0	7.24	980.68	81.9	0
2019-01-09 23:15:00	0	0	0	8.91	986.16	76.99	0
2019-01-09 23:30:00	0	0	0	7.71	970.39	83.9	0
2019-01-09 23:45:00	0	0	0	8.49	929.21	76.84	0
2019-01-10	0	0	0	7.71	1011.23	69.87	0
2019-01-10 00:15:00	0	0	0	9.15	1001.52	76.64	0
2019-01-10 00:30:00	0	0	0	10.62	945.78	67.99	0
2019-01-10 00:45:00	0	0	0	9.94	951.64	72.58	0
2019-01-10 01:00:00	0	0	0	10.29	932.74	66	0
2019-01-10 01:15:00	0	0	0	10.64	989.04	75.32	0
2019-01-10 01:30:00	0	0	0	9.64	977.29	78.3	0
2019-01-10 01:45:00	0	0	0	8.67	967.19	73.76	0
2019-01-10 02:00:00	0	0	0	10.8	940.13	80.76	0
2019-01-10 02:15:00	0	0	0	9.77	1013.59	79.47	0
2019-01-10 02:30:00	0	0	0	8.9	955.98	74.97	0
2019-01-10 02:45:00	0	0	0	10.39	975.09	67.33	0
2019-01-10 03:00:00	0	0	0	10.39	970.12	78.82	0
2019-01-10 03:15:00	0	0	0	9.2	993.08	67.64	0
2019-01-10 03:30:00	0	0	0	10.24	949.36	73.67	0
2019-01-10 03:45:00	0	0	0	10.93	945.31	68.43	0
2019-01-10 04:00:00	0	0	0	9.99	952.26	67.71	0
2019-01-10 04:15:00	0	0	0	10.7	941.81	66.88	0
2019-01-10 04:30:00	0	0	0	11.04	966.58	71.76	0
2019-01-10 04:45:00	0	0	0	11.13	1014.36	73	0
2019-01-10 05:00:00	0	0	0	10.61	955.82	66.53	0
2019-01-10 05:15:00	0	0	0	9.59	976.68	81.63	0
2019-01-10 05:30:00	0	0	0	9.45	942.53	69.26	0
2019-01-10 05:45:00	0	0	0	11.52	988.38	70.96	0
2019-01-10 06:00:00	0	0	0	11.04	927.01	80.89	0
2019-01-10 06:15:00	0	0	0	11.31	982.1	72.91	0
2019-01-10 06:30:00	0	0	0	11.68	980.09	71.95	0
2019-01-10 06:45:00	0	0	0	12	965.32	84.13	0
2019-01-10 07:00:00	0	0	0	11.3	938.11	76.02	0
2019-01-10 07:15:00	0	0	0	10.63	942.64	70.07	0
2019-01-10 07:30:00	10.47	9.11	1.36	10.82	962.82	82.96	0.36
2019-01-10 07:45:00	17.89	15.56	2.33	9.74	949.32	78.95	0.65
2019-01-10 08:00:00	23.32	20.29	3.03	10.55	977.41	77.79	0.82
2019-01-10 08:15:00	33.14	28.83	4.31	11.74	1011.9	78.53	1.27
2019-01-10 08:30:00	43.09	37.49	5.6	10.79	923.27	78.61	1.46
2019-01-10 08:45:00	55.5	48.29	7.22	12.88	998.01	82.77	1.58
2019-01-10 09:00:00	52.4	45.59	6.81	12.21	995.69	83.8	1.98
2019-01-10 09:15:00	69.7	60.64	9.06	12.73	966.69	74.25	2.31
2019-01-10 09:30:00	78.97	68.71	10.27	13.14	939.11	70.38	2.59
2019-01-10 09:45:00	86.53	75.28	11.25	11.41	1000.37	77.35	2.68
2019-01-10 10:00:00	79.7	69.34	10.36	13.77	947.3	84.97	3
2019-01-10 10:15:00	103.92	90.41	13.51	14.11	1008.2	71.25	3.25
2019-01-10 10:30:00	114.54	99.65	14.89	13.92	959.22	82.15	3.92
2019-01-10 10:45:00	123.05	107.06	16	12.6	985.48	78.16	3.56
2019-01-10 11:00:00	109.52	95.28	14.24	11.92	947.91	85.82	4.41
2019-01-10 11:15:00	120.62	104.94	15.68	14.1	936.82	78.81	4.59
2019-01-10 11:30:00	121.53	105.73	15.8	13.03	1008.87	74.1	4.59
2019-01-10 11:45:00	132.48	115.25	17.22	12.7	942.57	76.37	4.91
2019-01-10 12:00:00	166.18	144.58	21.6	14.45	1006.38	79.65	5.33
2019-01-10 12:15:00	171.79	149.46	22.33	12.64	937.4	78.62	5.77
2019-01-10 12:30:00	167.85	146.03	21.82	13.94	968.81	81.24	6.2
2019-01-10 12:45:00	173.98	151.37	22.62	14.91	961.92	77.69	5.45
2019-01-10 13:00:00	154	133.98	20.02	13.23	962.36	75.68	5.65
2019-01-10 13:15:00	160.99	140.06	20.93	13.93	990.54	72.84	5.57
2019-01-10 13:30:00	157.1	136.68	20.42	15.82	980.06	80.19	5.76
2019-01-10 13:45:00	138.55	120.54	18.01	15.85	940.15	75.1	5.54
2019-01-10 14:00:00	143.01	124.42	18.59	14.85	1004.35	86.81	4.83
2019-01-10 14:15:00	128.07	111.42	16.65	14.42	947.13	78.45	4.77
2019-01-10 14:30:00	112.78	98.12	14.66	13.62	936.95	78.38	4.39
2019-01-10 14:45:00	92.75	80.69	12.06	15.23	961.38	80.72	3.78
2019-01-10 15:00:00	81.68	71.06	10.62	15.02	989.11	82.03	3.19
2019-01-10 15:15:00	73.62	64.05	9.57	15.78	924.57	77.56	2.43
2019-01-10 15:30:00	56.08	48.79	7.29	14.95	994.99	79.57	2.22
2019-01-10 15:45:00	47.84	41.62	6.22	15.03	964.85	78.57	1.5
2019-01-10 16:00:00	36.71	31.94	4.77	14.77	981.27	78.22	1.43
2019-01-10 16:15:00	28.05	24.4	3.65	14.47	949.9	83.58	1.01
2019-01-10 16:30:00	18.3	15.93	2.38	14.69	979.42	76.11	0.62
2019-01-10 16:45:00	11.06	9.62	1.44	12.39	1006.51	73.14	0.39
2019-01-10 17:00:00	0	0	0	12.45	981.87	82.3	0
2019-01-10 17:15:00	0	0	0	12.93	961.76	79.17	0
2019-01-10 17:30:00	0	0	0	13.11	939.92	81.82	0
2019-01-10 17:45:00	0	0	0	13.91	963.24	77.62	0
2019-01-10 18:00:00	0	0	0	11.9	952.04	82.85	0
2019-01-10 18:15:00	0	0	0	13.62	1002.31	82.51	0
2019-01-10 18:30:00	0	0	0	12.08	931.16	89.08	0
2019-01-10 18:45:00	0	0	0	11.84	993.96	84.26	0
2019-01-10 19:00:00	0	0	0	11.75	1004.85	86.09	0
2019-01-10 19:15:00	0	0	0	13.04	956.57	76.94	0
2019-01-10 19:30:00	0	0	0	13.18	1013	84.93	0
2019-01-10 19:45:00	0	0	0	12.03	988.78	84.4	0
2019-01-10 20:00:00	0	0	0	11.95	1007.5	80.83	0
2019-01-10 20:15:00	0	0	0	13.12	947.81	72.72	0
2019-01-10 20:30:00	0	0	0	12.82	926.22	72.88	0
2019-01-10 20:45:00	0	0	0	12.93	978.05	73.66	0
2019-01-10 21:00:00	0	0	0	11.9	963.55	80.86	0
2019-01-10 21:15:00	0	0	0	11.57	964.11	84.22	0
2019-01-10 21:30:00	0	0	0	10.56	937.83	86.84	0
2019-01-10 21:45:00	0	0	0	10.41	925.17	83.81	0
2019-01-10 22:00:00	0	0	0	11.16	998	73.11	0
2019-01-10 22:15:00	0	0	0	12.34	977.03	82.96	0
2019-01-10 22:30:00	0	0	0	12.05	1001.86	73.63	0
2019-01-10 22:45:00	0	0	0	11.22	1007.87	81.09	0
2019-01-10 23:00:00	0	0	0	10.41	961.9	76.67	0
2019-01-10 23:15:00	0	0	0	11.99	1004.14	87.98	0
2019-01-10 23:30:00	0	0	0	9.95	928.61	77.73	0
2019-01-10 23:45:00	0	0	0	10.87	989.6	76.24	0
2019-01-11	0	0	0	9.7	1002.56	83.4	0
2019-01-11 00:15:00	0	0	0	9.42	939.35	82.46	0
2019-01-11 00:30:00	0	0	0	9.15	961.96	73.34	0
2019-01-11 00:45:00	0	0	0	10.4	940.64	75.27	0
2019-01-11 01:00:00	0	0	0	8.61	1020.56	84.49	0
2019-01-11 01:15:00	0	0	0	10.34	950.67	80.76	0
2019-01-11 01:30:00	0	0	0	9.56	1018.22	73.28	0
2019-01-11 01:45:00	0	0	0	10.71	965.49	84.51	0
2019-01-11 02:00:00	0	0	0	9.54	973.98	70.73	0
2019-01-11 02:15:00	0	0	0	9.68	975.53	72.25	0
2019-01-11 02:30:00	0	0	0	8.87	987.19	83.45	0
2019-01-11 02:45:00	0	0	0	10.16	1007.28	67.92	0
2019-01-11 03:00:00	0	0	0	10.85	950.36	76.42	0
2019-01-11 03:15:00	0	0	0	9.82	1008.46	80.53	0
2019-01-11 03:30:00	0	0	0	9.46	931.7	72.9	0
2019-01-11 03:45:00	0	0	0	9.88	977.36	79.4	0
2019-01-11 04:00:00	0	0	0	9.16	961.37	69.07	0
2019-01-11 04:15:00	0	0	0	11.19	1013.2	79.54	0
2019-01-11 04:30:00	0	0	0	11.38	967.24	69.92	0
2019-01-11 04:45:00	0	0	0	9.45	946.8	73.99	0
2019-01-11 05:00:00	0	0	0	9.24	952.33	74.86	0
2019-01-11 05:15:00	0	0	0	11.69	991.16	72.15	0
2019-01-11 05:30:00	0	0	0	11.65	935.83	83.45	0
2019-01-11 05:45:00	0	0	0	10.2	935.56	78.03	0
2019-01-11 06:00:00	0	0	0	10.23	944.31	68.88	0
2019-01-11 06:15:00	0	0	0	10.94	1017.52	78.85	0
2019-01-11 06:30:00	0	0	0	11.54	985.44	74.62	0
2019-01-11 06:45:00	0	0	0	10.46	960.64	80.55	0
2019-01-11 07:00:00	0	0	0	10.01	940.12	78.49	0
2019-01-11 07:15:00	21.79	18.96	2.83	10.65	985.65	75.28	0.64
2019-01-11 07:30:00	40.61	35.33	5.28	9.89	992.6	81.9	1.38
2019-01-11 07:45:00	80.59	70.11	10.48	12.03	959.28	70.53	2.22
2019-01-11 08:00:00	112.08	97.51	14.57	10.43	953.73	76.7	3.04
2019-01-11 08:15:00	132.58	115.35	17.24	12.61	977.26	72.26	4.34
2019-01-11 08:30:00	175.84	152.98	22.86	11.57	972.99	74.56	6.1
2019-01-11 08:45:00	196.33	170.8	25.52	13.06	966.53	77.29	6.07
2019-01-11 09:00:00	261.87	227.83	34.04	14.2	992.91	64.84	7.06
2019-01-11 09:15:00	266.94	232.24	34.7	15.18	996.89	65.56	9.04
2019-01-11 09:30:00	322.69	280.74	41.95	15.18	933.78	66.57	10.01
2019-01-11 09:45:00	310.26	269.93	40.33	15.35	1014.32	74.2	9.23
2019-01-11 10:00:00	282.78	246.01	36.76	17.33	977.39	70.39	10
2019-01-11 10:15:00	324.26	282.1	42.15	17.36	985	68.19	11.38
2019-01-11 10:30:00	316.62	275.46	41.16	15.42	987.89	65.48	11.5
2019-01-11 10:45:00	364	316.68	47.32	18.44	949.44	61.08	10.51
2019-01-11 11:00:00	364.34	316.98	47.36	17.79	955.36	69.28	10.75
2019-01-11 11:15:00	385.64	335.51	50.13	20.01	1006.91	59.91	12.13
2019-01-11 11:30:00	372.66	324.21	48.45	18.97	1016.26	56.57	11.1
2019-01-11 11:45:00	401.63	349.42	52.21	19.96	985.14	63.68	11.85
2019-01-11 12:00:00	378.35	329.16	49.19	20.37	946.79	63.64	12.3
2019-01-11 12:15:00	431.54	375.44	56.1	19.83	965.03	63.08	11.7
2019-01-11 12:30:00	391.68	340.76	50.92	20.95	929.29	64.92	12.88
2019-01-11 12:45:00	373.37	324.83	48.54	19.57	975.12	52.24	13.26
2019-01-11 13:00:00	430.01	374.11	55.9	18.64	998.2	56.44	11.53
2019-01-11 13:15:00	374.05	325.42	48.63	18.37	956.51	62	11.59
2019-01-11 13:30:00	366.46	318.82	47.64	18.52	950.75	52.44	13.23
2019-01-11 13:45:00	356.98	310.57	46.41	20.4	988.38	55.12	10.53
2019-01-11 14:00:00	353	307.11	45.89	21.6	956.14	55.16	9.73
2019-01-11 14:15:00	307.9	267.87	40.03	20.8	990.43	59.08	9.09
2019-01-11 14:30:00	240.12	208.91	31.22	21.31	1017.36	62.06	7.53
2019-01-11 14:45:00	210.99	183.56	27.43	19.91	974.96	63.4	6.55
2019-01-11 15:00:00	161.75	140.72	21.03	19.55	971.85	59.15	5.23
2019-01-11 15:15:00	102.54	89.21	13.33	18.19	946.32	64.07	3.39
2019-01-11 15:30:00	87.49	76.11	11.37	16.44	966.45	63.72	2.94
2019-01-11 15:45:00	74.81	65.08	9.72	20.21	1002.27	59.51	2.11
2019-01-11 16:00:00	61.15	53.2	7.95	17.51	1008.03	66.47	1.81
2019-01-11 16:15:00	35.87	31.21	4.66	16.64	1006.69	60.33	1.15
2019-01-11 16:30:00	23.04	20.05	3	17.25	935.91	63.85	0.82
2019-01-11 16:45:00	13.87	12.06	1.8	16.63	1018.21	70.67	0.51
2019-01-11 17:00:00	0	0	0	15.24	932.34	69.82	0
2019-01-11 17:15:00	0	0	0	14.62	966.52	66.74	0
2019-01-11 17:30:00	0	0	0	14.78	952.97	69.52	0
2019-01-11 17:45:00	0	0	0	13.9	993.28	78.89	0
2019-01-11 18:00:00	0	0	0	15.21	988.76	71.45	0
2019-01-11 18:15:00	0	0	0	15.49	972.85	66.07	0
2019-01-11 18:30:00	0	0	0	13.25	1004.74	81.49	0
2019-01-11 18:45:00	0	0	0	13.63	997.77	67.45	0
2019-01-11 19:00:00	0	0	0	12.27	937.89	78.35	0
2019-01-11 19:15:00	0	0	0	13.35	941.75	68.52	0
2019-01-11 19:30:00	0	0	0	12.81	952.47	74.3	0
2019-01-11 19:45:00	0	0	0	14.61	1021.74	84.45	0
2019-01-11 20:00:00	0	0	0	12.4	1002.33	82.34	0
2019-01-11 20:15:00	0	0	0	12.29	984.74	70.39	0
2019-01-11 20:30:00	0	0	0	12.76	936.01	80.48	0
2019-01-11 20:45:00	0	0	0	12.81	1001.86	69.88	0
2019-01-11 21:00:00	0	0	0	12.14	942.91	83.44	0
2019-01-11 21:15:00	0	0	0	11.41	966.14	69.74	0
2019-01-11 21:30:00	0	0	0	13.17	950.4	77.97	0
2019-01-11 21:45:00	0	0	0	13.22	948.48	73.51	0
2019-01-11 22:00:00	0	0	0	11.51	988.28	76.5	0
2019-01-11 22:15:00	0	0	0	12.08	978.01	69.73	0
2019-01-11 22:30:00	0	0	0	10.69	967.63	77.3	0
2019-01-11 22:45:00	0	0	0	12.61	929.2	68.89	0
2019-01-11 23:00:00	0	0	0	10.62	943	83.8	0
2019-01-11 23:15:00	0	0	0	11.46	969.63	83.18	0
2019-01-11 23:30:00	0	0	0	9.91	997.61	79.45	0
2019-01-11 23:45:00	0	0	0	10.96	1000.39	79.64	0
2019-01-12	0	0	0	12.39	967.92	92.74	0
2019-01-12 00:15:00	0	0	0	10.85	1020.9	92.17	0
2019-01-12 00:30:00	0	0	0	10.6	970.64	86.01	0
2019-01-12 00:45:00	0	0	0	11.4	969.58	87.54	0
2019-01-12 01:00:00	0	0	0	10.38	979.25	85.14	0
2019-01-12 01:15:00	0	0	0	10.05	1010.72	79.45	0
2019-01-12 01:30:00	0	0	0	9.99	984.57	79.34	0
2019-01-12 01:45:00	0	0	0	11.11	989.71	83.11	0
2019-01-12 02:00:00	0	0	0	10.8	950.86	82.12	0
2019-01-12 02:15:00	0	0	0	11.23	966.62	93.69	0
2019-01-12 02:30:00	0	0	0	10.82	1007.96	92.9	0
2019-01-12 02:45:00	0	0	0	10.91	934.03	88.32	0
2019-01-12 03:00:00	0	0	0	10.23	934.22	77.77	0
2019-01-12 03:15:00	0	0	0	10.4	928.03	86.18	0
2019-01-12 03:30:00	0	0	0	9.7	1005.57	89.41	0
2019-01-12 03:45:00	0	0	0	10.39	935.11	89.94	0
2019-01-12 04:00:00	0	0	0	9.1	990.58	88.92	0
2019-01-12 04:15:00	0	0	0	9.95	960.86	77.43	0
2019-01-12 04:30:00	0	0	0	8.43	1008.56	83.85	0
2019-01-12 04:45:00	0	0	0	10.66	993.74	83.93	0
2019-01-12 05:00:00	0	0	0	9.23	999.12	86.01	0
2019-01-12 05:15:00	0	0	0	8.72	935.61	80.16	0
2019-01-12 05:30:00	0	0	0	8.67	982.61	92.86	0
2019-01-12 05:45:00	0	0	0	9.76	939.19	78.17	0
2019-01-12 06:00:00	0	0	0	10.35	974.38	81.46	0
2019-01-12 06:15:00	0	0	0	10.28	1021.43	90.98	0
2019-01-12 06:30:00	0	0	0	10.73	996.29	84.05	0
2019-01-12 06:45:00	0	0	0	10.36	1014.8	91.92	0
2019-01-12 07:00:00	0	0	0	9.64	947.5	83.17	0
2019-01-12 07:15:00	12.35	10.74	1.61	8.63	1007.23	83.87	0.5
2019-01-12 07:30:00	25.78	22.43	3.35	10.29	931.04	79.24	1.09
2019-01-12 07:45:00	50.16	43.64	6.52	10.64	958.23	83.69	2.01
2019-01-12 08:00:00	79.29	68.98	10.31	8.87	968.19	90.44	3.42
2019-01-12 08:15:00	118.24	102.87	15.37	10.56	997.42	83.14	4.09
2019-01-12 08:30:00	140.9	122.58	18.32	10.31	1002.44	89.99	5.66
2019-01-12 08:45:00	172.25	149.86	22.39	11.34	1010.14	78.49	5.88
2019-01-12 09:00:00	186.61	162.35	24.26	11.47	1018.23	80.54	8.49
2019-01-12 09:15:00	198.88	173.03	25.85	11.65	996.34	76.32	7.75
2019-01-12 09:30:00	248.36	216.07	32.29	10.53	964.75	79.74	10.74
2019-01-12 09:45:00	242.21	210.72	31.49	12.22	937.42	72.64	11.19
2019-01-12 10:00:00	304.58	264.99	39.6	12.28	936.82	74.08	9.77
2019-01-12 10:15:00	276.13	240.23	35.9	12.13	966.99	75.56	10.26
2019-01-12 10:30:00	297.53	258.85	38.68	14.97	1015.76	77.42	11.8
2019-01-12 10:45:00	295.66	257.23	38.44	15.41	989.95	68.25	13.57
2019-01-12 11:00:00	330.1	287.19	42.91	15.86	978.96	76.32	12.21
2019-01-12 11:15:00	345.09	300.23	44.86	14.88	996.7	76.72	14.48
2019-01-12 11:30:00	347.21	302.07	45.14	14.42	962.41	62.5	14.7
2019-01-12 11:45:00	390	339.3	50.7	15.21	964.67	62.79	13.43
2019-01-12 12:00:00	406.47	353.63	52.84	18.07	997.78	66.54	12.93
2019-01-12 12:15:00	340.92	296.6	44.32	16.5	933.45	57.05	14.54
2019-01-12 12:30:00	375.83	326.97	48.86	19	934.63	57.34	14.16
2019-01-12 12:45:00	379.68	330.32	49.36	17.73	961.94	61.43	14.49
2019-01-12 13:00:00	351.36	305.68	45.68	18.12	1010.58	58.51	14.71
2019-01-12 13:15:00	433.2	376.88	56.32	17.37	929.44	62.04	16.38
2019-01-12 13:30:00	348.25	302.98	45.27	18.54	1008.99	61.28	15.93
2019-01-12 13:45:00	394.69	343.38	51.31	20.41	989.31	49.96	13.99
2019-01-12 14:00:00	352.02	306.26	45.76	17.85	970.91	60.34	13.83
2019-01-12 14:15:00	319.51	277.98	41.54	19.83	975.53	58.27	12.38
2019-01-12 14:30:00	346.94	301.84	45.1	16.59	980.76	54.62	13.88
2019-01-12 14:45:00	287.39	250.03	37.36	20.72	980.55	58.37	12.41
2019-01-12 15:00:00	282.26	245.56	36.69	18.88	943.62	50.78	10.19
2019-01-12 15:15:00	249.42	217	32.42	19.66	968.91	59.01	8.53
2019-01-12 15:30:00	225.42	196.11	29.3	18.02	999.99	55.12	8.15
2019-01-12 15:45:00	205.45	178.74	26.71	16.5	1009.79	63.28	8.13
2019-01-12 16:00:00	147.77	128.56	19.21	19.28	988.55	60.15	5.81
2019-01-12 16:15:00	134.66	117.15	17.51	17.82	944.63	64.01	4.44
2019-01-12 16:30:00	83.57	72.71	10.86	15.81	936.83	60.95	3.66
2019-01-12 16:45:00	47.82	41.6	6.22	17.15	973.46	61.58	2.06
2019-01-12 17:00:00	24.34	21.17	3.16	15.55	996.45	64.41	0.92
2019-01-12 17:15:00	0	0	0	14.83	988.77	61.09	0
2019-01-12 17:30:00	0	0	0	14.95	1023.31	56.69	0
2019-01-12 17:45:00	0	0	0	16.63	1005.03	57.63	0
2019-01-12 18:00:00	0	0	0	16.05	997.88	57.78	0
2019-01-12 18:15:00	0	0	0	13.32	966.13	68.19	0
2019-01-12 18:30:00	0	0	0	12.99	998.24	70.14	0
2019-01-12 18:45:00	0	0	0	13.89	933.37	75.71	0
2019-01-12 19:00:00	0	0	0	11.93	953.97	71.74	0
2019-01-12 19:15:00	0	0	0	11.59	927.62	65.3	0
2019-01-12 19:30:00	0	0	0	14.11	982.29	68.73	0
2019-01-12 19:45:00	0	0	0	12.71	1014.15	67.93	0
2019-01-12 20:00:00	0	0	0	12.75	1013.36	75.56	0
2019-01-12 20:15:00	0	0	0	11.56	991.38	69.48	0
2019-01-12 20:30:00	0	0	0	12.46	999.13	80.95	0
2019-01-12 20:45:00	0	0	0	11.92	953.56	78.38	0
2019-01-12 21:00:00	0	0	0	11.17	939.51	77.5	0
2019-01-12 21:15:00	0	0	0	11.78	1022.72	71.95	0
2019-01-12 21:30:00	0	0	0	12.39	1016.87	81.69	0
2019-01-12 21:45:00	0	0	0	11.72	1023.56	70.03	0
2019-01-12 22:00:00	0	0	0	11.71	962.75	82.24	0
2019-01-12 22:15:00	0	0	0	11.03	972.49	80.09	0
2019-01-12 22:30:00	0	0	0	12.01	928.66	72.21	0
2019-01-12 22:45:00	0	0	0	11.97	985.34	85.08	0
2019-01-12 23:00:00	0	0	0	11.59	980.79	80.62	0
2019-01-12 23:15:00	0	0	0	11.56	988.31	69.98	0
2019-01-12 23:30:00	0	0	0	10.76	940.54	82.96	0
2019-01-12 23:45:00	0	0	0	11.82	955.6	78.88	0
2019-01-13	0	0	0	10.58	945.17	97.52	0
2019-01-13 00:15:00	0	0	0	10.29	914.23	100	0
2019-01-13 00:30:00	0	0	0	8.82	988.49	90.65	0
2019-01-13 00:45:00	0	0	0	9.35	934.32	99.43	0
2019-01-13 01:00:00	0	0	0	11.09	959.09	100	0
2019-01-13 01:15:00	0	0	0	8.87	953.27	92.43	0
2019-01-13 01:30:00	0	0	0	8.79	951.43	100	0
2019-01-13 01:45:00	0	0	0	9.63	925.87	100	0
2019-01-13 02:00:00	0	0	0	9.15	930.54	100	0
2019-01-13 02:15:00	0	0	0	10.31	991.13	100	0
2019-01-13 02:30:00	0	0	0	9.11	977.15	100	0
2019-01-13 02:45:00	0	0	0	10.32	972.66	100	0
2019-01-13 03:00:00	0	0	0	9.7	947.61	96.46	0
2019-01-13 03:15:00	0	0	0	9.1	999.91	96.84	0
2019-01-13 03:30:00	0	0	0	9.04	969.53	100	0
2019-01-13 03:45:00	0	0	0	10.33	957.39	100	0
2019-01-13 04:00:00	0	0	0	8.97	947.87	94.29	0
2019-01-13 04:15:00	0	0	0	9.45	982.43	100	0
2019-01-13 04:30:00	0	0	0	8.92	973.63	96.15	0
2019-01-13 04:45:00	0	0	0	10.8	974.03	98.03	0
2019-01-13 05:00:00	0	0	0	9.94	943.07	99.54	0
2019-01-13 05:15:00	0	0	0	9.57	934.47	99.12	0
2019-01-13 05:30:00	0	0	0	9.95	981.12	100	0
2019-01-13 05:45:00	0	0	0	9.97	947.28	97.53	0
2019-01-13 06:00:00	0	0	0	9.24	939.02	100	0
2019-01-13 06:15:00	0	0	0	9.26	940.49	100	0
2019-01-13 06:30:00	0	0	0	9.61	953.25	100	0
2019-01-13 06:45:00	0	0	0	9.9	946.22	97.56	0
2019-01-13 07:00:00	0	0	0	10.69	942.08	100	0
2019-01-13 07:15:00	0	0	0	10.42	934.77	100	0.57
2019-01-13 07:30:00	0	0	0	8.97	923.87	100	1.18
2019-01-13 07:45:00	15.25	13.27	1.98	8.73	959.47	100	2.05
2019-01-13 08:00:00	26.39	22.96	3.43	10.28	932.4	100	3.14
2019-01-13 08:15:00	31.61	27.5	4.11	9.06	989.61	100	3.96
2019-01-13 08:30:00	42.23	36.74	5.49	9.9	973.76	100	5.56
2019-01-13 08:45:00	51.74	45.02	6.73	9.46	922.89	100	6.16
2019-01-13 09:00:00	74.63	64.93	9.7	10.95	967.34	96.6	8.27
2019-01-13 09:15:00	71.26	61.99	9.26	9.99	945.01	100	7.7
2019-01-13 09:30:00	94.96	82.62	12.35	9.85	1008.87	100	8.59
2019-01-13 09:45:00	93.09	80.99	12.1	10.95	923.2	100	9.94
2019-01-13 10:00:00	128.94	112.18	16.76	11.63	961.32	100	10.97
2019-01-13 10:15:00	145.16	126.29	18.87	11.54	981.29	93.03	9.88
2019-01-13 10:30:00	140.13	121.91	18.22	11.49	953.32	98.3	11.82
2019-01-13 10:45:00	171.28	149.02	22.27	12.25	1004.67	85.97	11.11
2019-01-13 11:00:00	200.75	174.65	26.1	12.56	1008.19	95.05	11.86
2019-01-13 11:15:00	213.11	185.41	27.7	12.9	954.02	100	10.53
2019-01-13 11:30:00	197.13	171.51	25.63	13.21	961.37	100	10.93
2019-01-13 11:45:00	210.9	183.49	27.42	11.95	986.83	84.79	13.69
2019-01-13 12:00:00	217.99	189.65	28.34	12.98	971.36	87.47	13.72
2019-01-13 12:15:00	234.54	204.05	30.49	15.21	959.84	90.69	13.47
2019-01-13 12:30:00	279.02	242.75	36.27	15.95	922.96	84.22	13.36
2019-01-13 12:45:00	246.02	214.03	31.98	13.31	927.8	77.83	14.71
2019-01-13 13:00:00	258.58	224.96	33.61	14.41	949.48	92.32	12.46
2019-01-13 13:15:00	274.89	239.15	35.74	16.38	974.35	89.11	14.82
2019-01-13 13:30:00	269.84	234.76	35.08	16.72	932.55	89.94	12.84
2019-01-13 13:45:00	237.82	206.9	30.92	17.84	953.47	88.52	11.59
2019-01-13 14:00:00	264.02	229.7	34.32	17.86	952.8	82.9	13.41
2019-01-13 14:15:00	236.13	205.43	30.7	15.47	914.71	77.47	11.25
2019-01-13 14:30:00	198.21	172.44	25.77	15.18	968.65	87.93	10.98
2019-01-13 14:45:00	203.8	177.31	26.49	16.9	999.19	78.65	9.08
2019-01-13 15:00:00	199.75	173.79	25.97	15.14	935.78	78.38	8.58
2019-01-13 15:15:00	143.53	124.87	18.66	17.47	937.17	93.99	7.47
2019-01-13 15:30:00	141.88	123.44	18.44	16.49	926.67	84.21	5.71
2019-01-13 15:45:00	131.13	114.08	17.05	16.37	942.74	83.15	5.6
2019-01-13 16:00:00	110.23	95.9	14.33	14.48	973.21	97.23	4.44
2019-01-13 16:15:00	70.48	61.32	9.16	15.13	941.61	94.15	2.91
2019-01-13 16:30:00	51.04	44.4	6.64	13.84	979.02	92.78	1.86
2019-01-13 16:45:00	34.72	30.21	4.51	16.51	997.41	90.6	1.13
2019-01-13 17:00:00	13.7	11.92	1.78	13.41	965.93	85.07	0.54
2019-01-13 17:15:00	0	0	0	15.35	953.1	86.17	0
2019-01-13 17:30:00	0	0	0	14.4	965.97	100	0
2019-01-13 17:45:00	0	0	0	12.89	1008.6	92.6	0
2019-01-13 18:00:00	0	0	0	13.5	952	89.89	0
2019-01-13 18:15:00	0	0	0	13.85	961.93	84.28	0
2019-01-13 18:30:00	0	0	0	12.68	962.4	98.34	0
2019-01-13 18:45:00	0	0	0	13.81	973.9	96.86	0
2019-01-13 19:00:00	0	0	0	12.69	958.77	91.16	0
2019-01-13 19:15:00	0	0	0	12.98	945.24	94.35	0
2019-01-13 19:30:00	0	0	0	11.52	952.68	90.56	0
2019-01-13 19:45:00	0	0	0	12.17	933.4	86.51	0
2019-01-13 20:00:00	0	0	0	12.38	971.76	99.71	0
2019-01-13 20:15:00	0	0	0	11.6	927.01	85.27	0
2019-01-13 20:30:00	0	0	0	11.3	928.58	84.22	0
2019-01-13 20:45:00	0	0	0	10.44	924.94	83.63	0
2019-01-13 21:00:00	0	0	0	10.85	928.78	83.95	0
2019-01-13 21:15:00	0	0	0	11.15	916.12	84.51	0
2019-01-13 21:30:00	0	0	0	11.31	989.38	86.58	0
2019-01-13 21:45:00	0	0	0	12.32	949.54	100	0
2019-01-13 22:00:00	0	0	0	10.43	932.85	97.87	0
2019-01-13 22:15:00	0	0	0	11.78	963.07	83.44	0
2019-01-13 22:30:00	0	0	0	9.82	960.26	98.47	0
2019-01-13 22:45:00	0	0	0	10.75	961.76	86.19	0
2019-01-13 23:00:00	0	0	0	10.6	1007.3	93.63	0
2019-01-13 23:15:00	0	0	0	12.23	982.95	97.4	0
2019-01-13 23:30:00	0	0	0	10.55	990.81	87.03	0
2019-01-13 23:45:00	0	0	0	11.03	964.5	91.08	0
2019-01-14	0	0	0	11.26	965.55	74.16	0
2019-01-14 00:15:00	0	0	0	9.92	933.27	75.23	0
2019-01-14 00:30:00	0	0	0	8.89	934.6	66.45	0
2019-01-14 00:45:00	0	0	0	10.36	1015.13	67.68	0
2019-01-14 01:00:00	0	0	0	10.22	974.72	66.65	0
2019-01-14 01:15:00	0	0	0	8.82	1003.66	67.75	0
2019-01-14 01:30:00	0	0	0	9.34	1002.36	63.35	0
2019-01-14 01:45:00	0	0	0	10.54	952.01	65.81	0
2019-01-14 02:00:00	0	0	0	9.89	989.04	72.58	0
2019-01-14 02:15:00	0	0	0	10.44	933.53	64.38	0
2019-01-14 02:30:00	0	0	0	10.14	948.68	72.44	0
2019-01-14 02:45:00	0	0	0	8.4	1025.86	62.86	0
2019-01-14 03:00:00	0	0	0	9.44	975.93	61.6	0
2019-01-14 03:15:00	0	0	0	8.51	964.77	67.19	0
2019-01-14 03:30:00	0	0	0	8.74	1011.73	70.78	0
2019-01-14 03:45:00	0	0	0	8.34	1006.09	65.38	0
2019-01-14 04:00:00	0	0	0	9.43	988.91	69.46	0
2019-01-14 04:15:00	0	0	0	9.55	953.41	66.48	0
2019-01-14 04:30:00	0	0	0	7.89	993.4	60.52	0
2019-01-14 04:45:00	0	0	0	9.47	1028.82	66.81	0
2019-01-14 05:00:00	0	0	0	9.09	1007.67	66.15	0
2019-01-14 05:15:00	0	0	0	9.63	964.99	72.45	0
2019-01-14 05:30:00	0	0	0	8.13	1029.64	71.17	0
2019-01-14 05:45:00	0	0	0	8.86	1023.14	61.6	0
2019-01-14 06:00:00	0	0	0	9.54	933.26	72.18	0
2019-01-14 06:15:00	0	0	0	9.14	989.26	66.34	0
2019-01-14 06:30:00	0	0	0	8.14	1002.98	64.81	0
2019-01-14 06:45:00	0	0	0	10.03	934.75	68.9	0
2019-01-14 07:00:00	0	0	0	8.08	991.62	69.55	0
2019-01-14 07:15:00	14.03	12.2	1.82	8.95	997.08	69.5	0.56
2019-01-14 07:30:00	32.23	28.04	4.19	9.78	948.47	72.97	1.24
2019-01-14 07:45:00	49.8	43.32	6.47	9.72	1023.59	62.47	2.13
2019-01-14 08:00:00	76.59	66.64	9.96	9.66	1020.49	70.47	2.81
2019-01-14 08:15:00	116.17	101.07	15.1	9.5	960.92	61.57	4.48
2019-01-14 08:30:00	123.62	107.55	16.07	10.95	962.1	69.81	4.68
2019-01-14 08:45:00	161.38	140.4	20.98	9.53	993.74	65.99	6.1
2019-01-14 09:00:00	202.82	176.45	26.37	10.03	937.88	57.73	8.09
2019-01-14 09:15:00	204.48	177.9	26.58	10.73	972.99	68.11	7.95
2019-01-14 09:30:00	238.47	207.47	31	11.16	1029.26	65.79	7.78
2019-01-14 09:45:00	219.96	191.37	28.6	12.84	956.56	54.46	8.61
2019-01-14 10:00:00	238.47	207.47	31	14.72	972.33	53.55	9.45
2019-01-14 10:15:00	248.84	216.49	32.35	13.01	1031.06	53.19	10.01
2019-01-14 10:30:00	251.36	218.68	32.68	14.31	933.84	55.09	10.79
2019-01-14 10:45:00	279.64	243.29	36.35	14.08	1023.13	53.45	11.35
2019-01-14 11:00:00	265.85	231.29	34.56	15.28	1013.37	51.37	11.34
2019-01-14 11:15:00	321.2	279.44	41.76	13.91	1002.11	57.3	10.73
2019-01-14 11:30:00	308.86	268.71	40.15	15.6	977.97	51.89	12.17
2019-01-14 11:45:00	290.16	252.44	37.72	16.86	1013.57	55.11	11.84
2019-01-14 12:00:00	309.67	269.41	40.26	17.52	968.68	49.59	13.01
2019-01-14 12:15:00	298.65	259.83	38.82	17.6	959.07	57.2	11.09
2019-01-14 12:30:00	291.16	253.31	37.85	17.61	948.03	53.29	11.14
2019-01-14 12:45:00	354.41	308.33	46.07	15.97	1005.84	59.64	12.94
2019-01-14 13:00:00	335.85	292.19	43.66	18.64	954.36	57.04	12.56
2019-01-14 13:15:00	351.55	305.85	45.7	15.59	1015.4	50.17	13.78
2019-01-14 13:30:00	322.49	280.57	41.92	15.83	1017.57	49.5	12.84
2019-01-14 13:45:00	315.87	274.81	41.06	15.94	1018.7	55.77	10.73
2019-01-14 14:00:00	286.3	249.08	37.22	17.85	1022.16	50.16	10.09
2019-01-14 14:15:00	252.72	219.86	32.85	15.58	932.14	50.47	10.9
2019-01-14 14:30:00	237	206.19	30.81	17.53	1010.55	50.64	9.81
2019-01-14 14:45:00	237.31	206.46	30.85	16.89	947.52	53.62	7.45
2019-01-14 15:00:00	184.23	160.28	23.95	15.18	940.69	57.19	6.79
2019-01-14 15:15:00	172.84	150.37	22.47	15.26	996.51	54.01	5.49
2019-01-14 15:30:00	143.12	124.51	18.61	17.92	1000.59	65.07	5.48
2019-01-14 15:45:00	116.33	101.21	15.12	15.5	966.04	63.21	4.89
2019-01-14 16:00:00	89.53	77.89	11.64	14.68	962.94	57.77	3.4
2019-01-14 16:15:00	65.83	57.28	8.56	15.24	992.21	70.75	3.09
2019-01-14 16:30:00	50.1	43.59	6.51	14.8	940.67	61.98	2
2019-01-14 16:45:00	26.99	23.48	3.51	16.87	952.82	71.23	1.26
2019-01-14 17:00:00	13.18	11.47	1.71	15.53	932.2	63.18	0.49
2019-01-14 17:15:00	0	0	0	14.41	1019.31	71.77	0
2019-01-14 17:30:00	0	0	0	14.37	949.98	73.12	0
2019-01-14 17:45:00	0	0	0	14.44	943.48	61.43	0
2019-01-14 18:00:00	0	0	0	13.35	963.22	74.85	0
2019-01-14 18:15:00	0	0	0	14.08	972.01	69.54	0
2019-01-14 18:30:00	0	0	0	13.34	980.34	72.22	0
2019-01-14 18:45:00	0	0	0	13.84	984.58	70.5	0
2019-01-14 19:00:00	0	0	0	13.75	973.21	68.13	0
2019-01-14 19:15:00	0	0	0	14.34	999.64	66.42	0
2019-01-14 19:30:00	0	0	0	12.06	1026.81	69.13	0
2019-01-14 19:45:00	0	0	0	12.16	972.55	72.82	0
2019-01-14 20:00:00	0	0	0	11.43	933.74	69.05	0
2019-01-14 20:15:00	0	0	0	12.53	942.77	61.85	0
2019-01-14 20:30:00	0	0	0	13.87	1004.61	61.9	0
2019-01-14 20:45:00	0	0	0	12.36	981.38	75.63	0
2019-01-14 21:00:00	0	0	0	13.57	975.43	73.76	0
2019-01-14 21:15:00	0	0	0	11.76	1027.61	65.56	0
2019-01-14 21:30:00	0	0	0	11.26	945.28	74.08	0
2019-01-14 21:45:00	0	0	0	12.97	974.9	63.11	0
2019-01-14 22:00:00	0	0	0	13.29	945.18	69.45	0
2019-01-14 22:15:00	0	0	0	10.56	975.32	66.27	0
2019-01-14 22:30:00	0	0	0	10.88	940.15	62.39	0
2019-01-14 22:45:00	0	0	0	10.19	994.64	77.01	0
2019-01-14 23:00:00	0	0	0	11.69	978.58	75.66	0
2019-01-14 23:15:00	0	0	0	12	973.74	62.28	0
2019-01-14 23:30:00	0	0	0	11.58	984.45	69.97	0
2019-01-14 23:45:00	0	0	0	10.42	1016.73	69.27	0
2019-01-15	0	0	0	9.42	939.38	82.56	0
2019-01-15 00:15:00	0	0	0	8.21	979.29	85.49	0
2019-01-15 00:30:00	0	0	0	8.34	941.15	83.25	0
2019-01-15 00:45:00	0	0	0	9.2	915.8	92.22	0
2019-01-15 01:00:00	0	0	0	8.57	915.05	84.9	0
2019-01-15 01:15:00	0	0	0	8.91	928.29	93.64	0
2019-01-15 01:30:00	0	0	0	9.21	954.64	79.12	0
2019-01-15 01:45:00	0	0	0	9.63	997.17	87.41	0
2019-01-15 02:00:00	0	0	0	9.42	993.38	92.2	0
2019-01-15 02:15:00	0	0	0	8.94	973.02	91.36	0
2019-01-15 02:30:00	0	0	0	8.6	940.61	94.96	0
2019-01-15 02:45:00	0	0	0	9.49	970.55	94.96	0
2019-01-15 03:00:00	0	0	0	9.71	953.96	81.28	0
2019-01-15 03:15:00	0	0	0	9.5	958	93.56	0
2019-01-15 03:30:00	0	0	0	9.96	986.44	89.8	0
2019-01-15 03:45:00	0	0	0	8.24	930.31	85.89	0
2019-01-15 04:00:00	0	0	0	8.03	906.38	81.06	0
2019-01-15 04:15:00	0	0	0	8.81	913.82	88.44	0
2019-01-15 04:30:00	0	0	0	8.51	922.77	84.07	0
2019-01-15 04:45:00	0	0	0	9.98	944.24	92.35	0
2019-01-15 05:00:00	0	0	0	9.25	945.03	87.19	0
2019-01-15 05:15:00	0	0	0	8.02	987.83	97.55	0
2019-01-15 05:30:00	0	0	0	8.37	930.31	97.54	0
2019-01-15 05:45:00	0	0	0	9.85	915.23	91.6	0
2019-01-15 06:00:00	0	0	0	9.85	930.17	87.59	0
2019-01-15 06:15:00	0	0	0	8.7	950.46	92.69	0
2019-01-15 06:30:00	0	0	0	9.58	958.42	96.9	0
2019-01-15 06:45:00	0	0	0	9.94	939.34	87.65	0
2019-01-15 07:00:00	0	0	0	9.17	911.23	92.41	0
2019-01-15 07:15:00	0	0	0	9.11	922.75	95.69	0
2019-01-15 07:30:00	0	0	0	9.1	918.4	85.12	0
2019-01-15 07:45:00	16.97	14.76	2.21	9.26	971.01	97.86	0.64
2019-01-15 08:00:00	27.8	24.19	3.61	10.02	1001.01	91.02	1.02
2019-01-15 08:15:00	38.56	33.54	5.01	9.91	953.03	81.49	1.32
2019-01-15 08:30:00	54.88	47.75	7.13	8.32	955.55	82.33	1.86
2019-01-15 08:45:00	66.95	58.25	8.7	9.79	916.12	87.18	2.31
2019-01-15 09:00:00	61.67	53.66	8.02	9.53	995.98	84.05	2.44
2019-01-15 09:15:00	88.11	76.66	11.45	10.44	958.18	83.32	2.97
2019-01-15 09:30:00	79.41	69.08	10.32	9.52	999.7	77.55	3.33
2019-01-15 09:45:00	85.89	74.73	11.17	9.21	996.3	81.7	2.97
2019-01-15 10:00:00	92.99	80.9	12.09	9.94	1000.82	88.41	3.44
2019-01-15 10:15:00	100.11	87.09	13.01	10.88	1001.18	77.55	3.15
2019-01-15 10:30:00	102.84	89.47	13.37	9.43	974.47	87.37	3.24
2019-01-15 10:45:00	107.95	93.92	14.03	9.75	941.7	87.06	4.01
2019-01-15 11:00:00	102.62	89.28	13.34	10.07	908.95	80.04	4.18
2019-01-15 11:15:00	109.17	94.97	14.19	11.03	954.88	92.01	4.37
2019-01-15 11:30:00	124.71	108.5	16.21	11.64	919.34	78.77	3.61
2019-01-15 11:45:00	109.56	95.32	14.24	11.62	961.9	88.63	4.15
2019-01-15 12:00:00	129.94	113.05	16.89	9.86	908.06	84.86	4.26
2019-01-15 12:15:00	129.08	112.3	16.78	10.63	984.59	78.93	3.9
2019-01-15 12:30:00	129.88	113	16.88	10.99	935.66	82.23	4.83
2019-01-15 12:45:00	124.91	108.67	16.24	12.04	986.49	81.71	4.61
2019-01-15 13:00:00	110.39	96.04	14.35	12.43	988.19	75.09	4.89
2019-01-15 13:15:00	112.48	97.86	14.62	12.5	947.06	77.03	3.95
2019-01-15 13:30:00	127.2	110.66	16.54	11.92	980.88	73.13	3.9
2019-01-15 13:45:00	128.98	112.22	16.77	10.46	982.58	86.07	4.49
2019-01-15 14:00:00	105.72	91.98	13.74	11.6	911.29	78.05	4.11
2019-01-15 14:15:00	111.12	96.68	14.45	11.38	965.51	73.01	3.58
2019-01-15 14:30:00	85.44	74.33	11.11	11.38	965.42	75.44	3.56
2019-01-15 14:45:00	81.73	71.1	10.62	9.87	981.88	81.66	3.11
2019-01-15 15:00:00	64.57	56.17	8.39	10.38	937.52	82.62	2.75
2019-01-15 15:15:00	58.38	50.79	7.59	9.92	932.96	83.06	2.13
2019-01-15 15:30:00	56.44	49.1	7.34	9.83	963.71	83.54	2.13
2019-01-15 15:45:00	50.92	44.3	6.62	9.72	919.59	74.46	1.55
2019-01-15 16:00:00	40.97	35.65	5.33	9.78	979.5	72.96	1.25
2019-01-15 16:15:00	29.8	25.92	3.87	9.21	992.11	76.38	0.93
2019-01-15 16:30:00	18.29	15.91	2.38	9.67	967.17	87.32	0.74
2019-01-15 16:45:00	10.85	9.44	1.41	9.94	905.68	81.84	0.46
2019-01-15 17:00:00	0	0	0	10.31	921.6	78.36	0
2019-01-15 17:15:00	0	0	0	10.32	941.64	76.56	0
2019-01-15 17:30:00	0	0	0	9.16	950.79	79.85	0
2019-01-15 17:45:00	0	0	0	8.72	951.49	75.75	0
2019-01-15 18:00:00	0	0	0	8.97	926.36	76.09	0
2019-01-15 18:15:00	0	0	0	8.43	987	82.72	0
2019-01-15 18:30:00	0	0	0	8.14	964	84.31	0
2019-01-15 18:45:00	0	0	0	9.75	983.34	88.54	0
2019-01-15 19:00:00	0	0	0	9.33	958.02	88.87	0
2019-01-15 19:15:00	0	0	0	8	972.21	76.65	0
2019-01-15 19:30:00	0	0	0	8.54	978.59	85.33	0
2019-01-15 19:45:00	0	0	0	8.16	969.41	80.06	0
2019-01-15 20:00:00	0	0	0	8.3	988.68	86.3	0
2019-01-15 20:15:00	0	0	0	8.26	940.08	83.14	0
2019-01-15 20:30:00	0	0	0	7.09	920.23	89.97	0
2019-01-15 20:45:00	0	0	0	8.48	934.47	78.64	0
2019-01-15 21:00:00	0	0	0	8.08	986	97.41	0
2019-01-15 21:15:00	0	0	0	6.92	926.06	88.26	0
2019-01-15 21:30:00	0	0	0	7.81	972.58	80.21	0
2019-01-15 21:45:00	0	0	0	7.24	981.55	82.88	0
2019-01-15 22:00:00	0	0	0	7.72	975.5	98.9	0
2019-01-15 22:15:00	0	0	0	6.99	948.91	91.98	0
2019-01-15 22:30:00	0	0	0	8.07	934.22	90.64	0
2019-01-15 22:45:00	0	0	0	7.81	918.04	87.24	0
2019-01-15 23:00:00	0	0	0	7.54	926.06	93.13	0
2019-01-15 23:15:00	0	0	0	6.23	949.07	95.31	0
2019-01-15 23:30:00	0	0	0	7.53	909.78	92.82	0
2019-01-15 23:45:00	0	0	0	7.12	996.95	80.71	0
2019-01-16	0	0	0	7.2	976.02	85.51	0
2019-01-16 00:15:00	0	0	0	7	1005.11	78.11	0
2019-01-16 00:30:00	0	0	0	6.2	969.06	81.03	0
2019-01-16 00:45:00	0	0	0	6.53	946.94	70.33	0
2019-01-16 01:00:00	0	0	0	5.69	977.78	78.24	0
2019-01-16 01:15:00	0	0	0	6.39	946.45	77.4	0
2019-01-16 01:30:00	0	0	0	6.15	984.3	69.34	0
2019-01-16 01:45:00	0	0	0	6.34	924.22	75.92	0
2019-01-16 02:00:00	0	0	0	6.21	998.95	69.76	0
2019-01-16 02:15:00	0	0	0	5.68	919.45	71.06	0
2019-01-16 02:30:00	0	0	0	6.13	973.25	83.74	0
2019-01-16 02:45:00	0	0	0	5.05	969.18	73.44	0
2019-01-16 03:00:00	0	0	0	5.11	966.16	84.37	0
2019-01-16 03:15:00	0	0	0	5.13	1002.18	77.53	0
2019-01-16 03:30:00	0	0	0	4.83	965.96	75.8	0
2019-01-16 03:45:00	0	0	0	5.67	981.11	74.24	0
2019-01-16 04:00:00	0	0	0	5.19	961.25	72.39	0
2019-01-16 04:15:00	0	0	0	5.68	996.38	75.97	0
2019-01-16 04:30:00	0	0	0	5.59	961.08	70.86	0
2019-01-16 04:45:00	0	0	0	5.64	946.63	80.06	0
2019-01-16 05:00:00	0	0	0	4.74	918.54	78.65	0
2019-01-16 05:15:00	0	0	0	4.64	978.86	81.31	0
2019-01-16 05:30:00	0	0	0	5.63	997.59	67.92	0
2019-01-16 05:45:00	0	0	0	5.13	999.63	78.38	0
2019-01-16 06:00:00	0	0	0	5.6	1006.7	81.91	0
2019-01-16 06:15:00	0	0	0	5.47	923.91	78.65	0
2019-01-16 06:30:00	0	0	0	5.8	979.21	70.84	0
2019-01-16 06:45:00	0	0	0	4.62	929.57	74.87	0
2019-01-16 07:00:00	0	0	0	4.62	916.21	79.25	0
2019-01-16 07:15:00	0	0	0	4.73	937.87	83.1	0
2019-01-16 07:30:00	16.35	14.22	2.13	4.78	989.41	75.78	0.71
2019-01-16 07:45:00	29.61	25.76	3.85	5.6	923.06	79.21	1.42
2019-01-16 08:00:00	47.88	41.65	6.22	4.7	977.94	72.65	1.92
2019-01-16 08:15:00	64.63	56.23	8.4	5.46	979.56	79.88	2.93
2019-01-16 08:30:00	79.13	68.85	10.29	5.62	917.04	71.24	3.08
2019-01-16 08:45:00	100.78	87.68	13.1	6.24	975.3	67.3	4.2
2019-01-16 09:00:00	109.56	95.32	14.24	5.77	927.1	68.66	5.21
2019-01-16 09:15:00	116.78	101.6	15.18	6.3	1012.5	65.9	5.01
2019-01-16 09:30:00	140.04	121.84	18.21	6.62	989.44	74.25	5.85
2019-01-16 09:45:00	153.16	133.25	19.91	7.26	984	74.66	5.33
2019-01-16 10:00:00	131.55	114.45	17.1	7.64	946.72	64.29	6.09
2019-01-16 10:15:00	153.77	133.78	19.99	7.5	978.23	73.03	6.31
2019-01-16 10:30:00	139.68	121.52	18.16	8.94	945.95	63.25	6.64
2019-01-16 10:45:00	139.02	120.95	18.07	7.95	958.1	72.46	6.71
2019-01-16 11:00:00	143.51	124.85	18.66	8.19	938.97	71.91	6.6
2019-01-16 11:15:00	141.78	123.35	18.43	8.05	944.61	73.06	7
2019-01-16 11:30:00	155.21	135.04	20.18	7.91	970.92	62.85	7.51
2019-01-16 11:45:00	167.77	145.96	21.81	8.57	931.44	62	7.68
2019-01-16 12:00:00	164.71	143.3	21.41	8.92	991.89	63.11	6.29
2019-01-16 12:15:00	152.77	132.91	19.86	7.61	919.9	68.78	7.29
2019-01-16 12:30:00	175.47	152.66	22.81	9.25	949.14	62.89	7.24
2019-01-16 12:45:00	150.45	130.89	19.56	8.74	983.21	74.35	6.62
2019-01-16 13:00:00	175.14	152.37	22.77	8.48	990.87	66.52	7.76
2019-01-16 13:15:00	178.35	155.16	23.19	8.72	1009.66	70.3	6.97
2019-01-16 13:30:00	164.56	143.17	21.39	8.27	942.26	64.99	7.8
2019-01-16 13:45:00	182.87	159.1	23.77	7.91	978.35	67.93	7
2019-01-16 14:00:00	144.96	126.11	18.84	7.02	998.22	61.62	6.48
2019-01-16 14:15:00	163.07	141.87	21.2	8.25	939.51	60.93	5.69
2019-01-16 14:30:00	138.13	120.17	17.96	6.81	938.49	61.91	5.43
2019-01-16 14:45:00	111.79	97.26	14.53	7.8	965.17	71.97	5.16
2019-01-16 15:00:00	108.37	94.28	14.09	7.84	925.93	65.94	4.69
2019-01-16 15:15:00	87.42	76.05	11.36	7.31	986.27	63.14	3.64
2019-01-16 15:30:00	86.1	74.9	11.19	6.41	967.13	75.18	3.67
2019-01-16 15:45:00	82.86	72.08	10.77	7.53	958.11	65.96	2.9
2019-01-16 16:00:00	67.09	58.37	8.72	7.01	998.91	69.8	2.34
2019-01-16 16:15:00	47.77	41.56	6.21	5.94	989.67	78.75	1.88
2019-01-16 16:30:00	36.32	31.6	4.72	6.67	998.6	70.41	1.23
2019-01-16 16:45:00	19.6	17.05	2.55	5.99	974.49	79.53	0.85
2019-01-16 17:00:00	9.69	8.43	1.26	6.02	989.18	73.5	0.42
2019-01-16 17:15:00	0	0	0	6.3	934.92	73.49	0
2019-01-16 17:30:00	0	0	0	6.31	925.04	82.77	0
2019-01-16 17:45:00	0	0	0	5.75	1001.27	71.44	0
2019-01-16 18:00:00	0	0	0	5.51	988.03	69.09	0
2019-01-16 18:15:00	0	0	0	5.59	931.25	72.24	0
2019-01-16 18:30:00	0	0	0	4.96	917.26	78.46	0
2019-01-16 18:45:00	0	0	0	5.23	944.95	73.99	0
2019-01-16 19:00:00	0	0	0	5.87	955.36	82.45	0
2019-01-16 19:15:00	0	0	0	5.55	967.68	71.96	0
2019-01-16 19:30:00	0	0	0	5.77	1000.54	78.64	0
2019-01-16 19:45:00	0	0	0	4.87	989.89	70.1	0
2019-01-16 20:00:00	0	0	0	4.49	1004.37	78.21	0
2019-01-16 20:15:00	0	0	0	4.58	981.3	81.96	0
2019-01-16 20:30:00	0	0	0	4.85	962.28	72.71	0
2019-01-16 20:45:00	0	0	0	4.67	961.36	86.06	0
2019-01-16 21:00:00	0	0	0	5.18	988.84	86.42	0
2019-01-16 21:15:00	0	0	0	5.24	1001.53	78.89	0
2019-01-16 21:30:00	0	0	0	4.76	1007.32	85.25	0
2019-01-16 21:45:00	0	0	0	4.13	941.69	73.28	0
2019-01-16 22:00:00	0	0	0	4.42	943.61	88.25	0
2019-01-16 22:15:00	0	0	0	4.07	925.38	83.84	0
2019-01-16 22:30:00	0	0	0	4.53	954.48	75.89	0
2019-01-16 22:45:00	0	0	0	4.53	930.27	84.59	0
2019-01-16 23:00:00	0	0	0	4.67	956.13	87.01	0
2019-01-16 23:15:00	0	0	0	4.55	943.98	81.89	0
2019-01-16 23:30:00	0	0	0	4.75	975.88	88.54	0
2019-01-16 23:45:00	0	0	0	3.92	968.98	93.47	0
2019-01-17	0	0	0	4.35	957.96	94.52	0
2019-01-17 00:15:00	0	0	0	4.31	1006.82	100	0
2019-01-17 00:30:00	0	0	0	3.92	943.66	100	0
2019-01-17 00:45:00	0	0	0	3.85	948.21	95.64	0
2019-01-17 01:00:00	0	0	0	3.56	952.12	93.58	0
2019-01-17 01:15:00	0	0	0	4.33	933.14	100	0
2019-01-17 01:30:00	0	0	0	4.26	929.89	100	0
2019-01-17 01:45:00	0	0	0	3.73	1001.05	100	0
2019-01-17 02:00:00	0	0	0	3.97	966.2	96.78	0
2019-01-17 02:15:00	0	0	0	3.44	956.54	97.3	0
2019-01-17 02:30:00	0	0	0	3.54	941.05	100	0
2019-01-17 02:45:00	0	0	0	4.22	981.03	100	0
2019-01-17 03:00:00	0	0	0	3.82	938.37	100	0
2019-01-17 03:15:00	0	0	0	3.56	961.94	100	0
2019-01-17 03:30:00	0	0	0	3.79	932.64	95.54	0
2019-01-17 03:45:00	0	0	0	3.84	941.95	91.34	0
2019-01-17 04:00:00	0	0	0	3.36	931.88	97.08	0
2019-01-17 04:15:00	0	0	0	3.73	935.05	100	0
2019-01-17 04:30:00	0	0	0	3.59	1008.05	100	0
2019-01-17 04:45:00	0	0	0	3.71	967.52	91.41	0
2019-01-17 05:00:00	0	0	0	4.06	959.74	100	0
2019-01-17 05:15:00	0	0	0	3.9	966.98	99.22	0
2019-01-17 05:30:00	0	0	0	3.58	929.29	100	0
2019-01-17 05:45:00	0	0	0	3.72	1003.84	100	0
2019-01-17 06:00:00	0	0	0	3.29	962.5	97.63	0
2019-01-17 06:15:00	0	0	0	3.37	1005.62	100	0
2019-01-17 06:30:00	0	0	0	4.15	991.54	97.57	0
2019-01-17 06:45:00	0	0	0	3.74	945.36	100	0
2019-01-17 07:00:00	0	0	0	4.04	931.22	98.94	0
2019-01-17 07:15:00	10.34	8.99	1.34	4.11	1008.3	92.62	0.42
2019-01-17 07:30:00	30.14	26.22	3.92	3.61	935.58	98.09	0.96
2019-01-17 07:45:00	57.11	49.69	7.42	3.91	970.21	100	2.17
2019-01-17 08:00:00	79.78	69.41	10.37	4.13	1020.49	100	3.59
2019-01-17 08:15:00	131.95	114.8	17.15	3.79	954.77	100	4.57
2019-01-17 08:30:00	147.86	128.64	19.22	4.2	939.4	89.64	6.6
2019-01-17 08:45:00	175.99	153.11	22.88	4.71	1019.72	100	8.34
2019-01-17 09:00:00	258.02	224.48	33.54	4.49	932.29	100	9.59
2019-01-17 09:15:00	280.69	244.2	36.49	5.23	1019.88	100	10.19
2019-01-17 09:30:00	270.74	235.54	35.2	6.27	947.88	86.73	10.17
2019-01-17 09:45:00	317.8	276.48	41.31	5.96	944.81	89.49	11.95
2019-01-17 10:00:00	332.14	288.96	43.18	6.55	1024.74	78.08	13.74
2019-01-17 10:15:00	336.66	292.89	43.77	7.27	992.86	80.56	15.4
2019-01-17 10:30:00	366.13	318.53	47.6	7.13	1000.16	85.56	16.05
2019-01-17 10:45:00	397.55	345.87	51.68	7.97	964.92	81.39	16.27
2019-01-17 11:00:00	392.64	341.6	51.04	9.29	969.23	78.76	15.42
2019-01-17 11:15:00	464.01	403.69	60.32	9.64	957.86	67.11	16.12
2019-01-17 11:30:00	527.4	458.84	68.56	9.45	959.34	72	16.86
2019-01-17 11:45:00	522.89	454.92	67.98	9.98	996.94	73.09	17.76
2019-01-17 12:00:00	501.01	435.88	65.13	9.83	991.62	72.76	21.44
2019-01-17 12:15:00	485.86	422.7	63.16	10.2	955.92	72.33	21.33
2019-01-17 12:30:00	491.85	427.91	63.94	10.88	1015.44	66.45	19.49
2019-01-17 12:45:00	585.32	509.23	76.09	11.09	947.13	57.17	21.66
2019-01-17 13:00:00	549.74	478.27	71.47	11.2	955.92	60.4	21.21
2019-01-17 13:15:00	529.46	460.63	68.83	10.81	998.21	54.01	22.36
2019-01-17 13:30:00	484.94	421.9	63.04	13.35	965.49	64.25	18.76
2019-01-17 13:45:00	578.83	503.58	75.25	13.33	1000.26	54.99	18.49
2019-01-17 14:00:00	516.67	449.51	67.17	12.7	957.53	56.49	18.42
2019-01-17 14:15:00	513.37	446.63	66.74	13.26	963.43	56.69	19.51
2019-01-17 14:30:00	483.23	420.41	62.82	12.92	931.32	61.19	16.65
2019-01-17 14:45:00	406.91	354.01	52.9	10.82	927.22	62.93	14.1
2019-01-17 15:00:00	396.8	345.21	51.58	12.15	984.67	61.75	15.18
2019-01-17 15:15:00	350.83	305.22	45.61	10.71	978.09	69.02	11.23
2019-01-17 15:30:00	327.23	284.69	42.54	11.47	937.65	64.28	10.17
2019-01-17 15:45:00	274.96	239.21	35.74	11.47	1019.02	67.7	9.15
2019-01-17 16:00:00	225.79	196.43	29.35	11.16	954.78	64.06	9.03
2019-01-17 16:15:00	152.93	133.05	19.88	10.29	1007.09	76.67	7.11
2019-01-17 16:30:00	132.58	115.34	17.23	10.03	954.76	65.59	4.91
2019-01-17 16:45:00	79.31	69	10.31	11.32	964.61	79.98	2.73
2019-01-17 17:00:00	34.85	30.32	4.53	8.99	961.18	82.75	1.49
2019-01-17 17:15:00	10.26	8.93	1.33	9.83	937.6	78.2	0.38
2019-01-17 17:30:00	0	0	0	9	1015.19	79.36	0
2019-01-17 17:45:00	0	0	0	8.86	983.64	86.56	0
2019-01-17 18:00:00	0	0	0	8.57	969.06	88.16	0
2019-01-17 18:15:00	0	0	0	7.95	935.27	86.01	0
2019-01-17 18:30:00	0	0	0	7.08	933.26	87.67	0
2019-01-17 18:45:00	0	0	0	7.27	935.81	76.84	0
2019-01-17 19:00:00	0	0	0	6.56	975.07	79.15	0
2019-01-17 19:15:00	0	0	0	6.29	1022.14	89.92	0
2019-01-17 19:30:00	0	0	0	5.36	1015.42	83.09	0
2019-01-17 19:45:00	0	0	0	5.79	946.79	95.66	0
2019-01-17 20:00:00	0	0	0	5.2	994.09	86.37	0
2019-01-17 20:15:00	0	0	0	4.45	930.6	94.94	0
2019-01-17 20:30:00	0	0	0	4.78	962.07	93.46	0
2019-01-17 20:45:00	0	0	0	4.43	981.63	95.09	0
2019-01-17 21:00:00	0	0	0	3.99	969.96	89.48	0
2019-01-17 21:15:00	0	0	0	3.43	1012.89	95.39	0
2019-01-17 21:30:00	0	0	0	3.65	999.28	92.04	0
2019-01-17 21:45:00	0	0	0	3.04	974.37	86.13	0
2019-01-17 22:00:00	0	0	0	3.24	1015.78	84.99	0
2019-01-17 22:15:00	0	0	0	2.62	1003.97	100	0
2019-01-17 22:30:00	0	0	0	2.87	1003.75	99.91	0
2019-01-17 22:45:00	0	0	0	2.39	939.56	100	0
2019-01-17 23:00:00	0	0	0	2.35	971.09	100	0
2019-01-17 23:15:00	0	0	0	1.99	961.96	100	0
2019-01-17 23:30:00	0	0	0	2.1	986.67	97.43	0
2019-01-17 23:45:00	0	0	0	1.77	946.8	87.5	0
2019-01-18	0	0	0	1.71	935.19	99.57	0
2019-01-18 00:15:00	0	0	0	0.36	990.48	100	0
2019-01-18 00:30:00	0	0	0	0.17	975.32	96.98	0
2019-01-18 00:45:00	0	0	0	0	936.05	100	0
2019-01-18 01:00:00	0	0	0	-0.14	939.76	100	0
2019-01-18 01:15:00	0	0	0	-0.32	986.53	88.15	0
2019-01-18 01:30:00	0	0	0	-0.46	994.37	92.43	0
2019-01-18 01:45:00	0	0	0	-0.52	966.94	100	0
2019-01-18 02:00:00	0	0	0	-0.69	924.17	100	0
2019-01-18 02:15:00	0	0	0	-0.72	968.33	100	0
2019-01-18 02:30:00	0	0	0	-0.93	917.17	95.4	0
2019-01-18 02:45:00	0	0	0	-0.99	964.56	100	0
2019-01-18 03:00:00	0	0	0	-1.09	980.25	94.27	0
2019-01-18 03:15:00	0	0	0	-1.4	948.74	100	0
2019-01-18 03:30:00	0	0	0	-1.55	978.4	100	0
2019-01-18 03:45:00	0	0	0	-1.35	974.83	97.88	0
2019-01-18 04:00:00	0	0	0	-1.44	987.44	94.79	0
2019-01-18 04:15:00	0	0	0	-1.77	995.91	92.84	0
2019-01-18 04:30:00	0	0	0	-1.81	953.72	89.27	0
2019-01-18 04:45:00	0	0	0	-1.65	942	90.81	0
2019-01-18 05:00:00	0	0	0	-1.89	983.2	91.56	0
2019-01-18 05:15:00	0	0	0	-1.72	950.24	92.08	0
2019-01-18 05:30:00	0	0	0	-1.68	965.41	100	0
2019-01-18 05:45:00	0	0	0	-1.42	965.84	100	0
2019-01-18 06:00:00	0	0	0	-1.25	976.81	93.66	0
2019-01-18 06:15:00	0	0	0	-1.2	908.59	100	0
2019-01-18 06:30:00	0	0	0	-0.94	979.51	100	0
2019-01-18 06:45:00	0	0	0	-0.79	946.44	95.3	0
2019-01-18 07:00:00	0	0	0	-0.48	932.27	95.36	0
2019-01-18 07:15:00	26.15	22.75	3.4	-0.22	947.65	83.29	0.91
2019-01-18 07:30:00	59.07	51.39	7.68	0.06	907.78	98.12	2.34
2019-01-18 07:45:00	93.98	81.76	12.22	0.37	929.22	88.95	3.76
2019-01-18 08:00:00	149.63	130.18	19.45	0.62	961.26	90.99	5.13
2019-01-18 08:15:00	213.29	185.56	27.73	1.25	972.13	86.63	6.44
2019-01-18 08:30:00	268.16	233.3	34.86	2.07	982.68	91.25	7.95
2019-01-18 08:45:00	273.91	238.31	35.61	2.44	1000.48	84.68	10.27
2019-01-18 09:00:00	373.69	325.11	48.58	4.07	988.7	73.72	13.52
2019-01-18 09:15:00	444.31	386.55	57.76	4.4	989.06	68.52	15.21
2019-01-18 09:30:00	450.56	391.98	58.57	6.14	988.19	72.24	15.34
2019-01-18 09:45:00	466.85	406.16	60.69	7.72	999.4	74.26	15.81
2019-01-18 10:00:00	492.99	428.9	64.09	7.46	930.08	60.44	16.33
2019-01-18 10:15:00	555.26	483.08	72.18	10.46	999.18	62.36	17.61
2019-01-18 10:30:00	526.82	458.33	68.49	9.25	981.65	54.22	19.73
2019-01-18 10:45:00	555.13	482.96	72.17	10.38	999.21	56.24	19.84
2019-01-18 11:00:00	548.73	477.4	71.34	12.25	930.58	50.8	19.32
2019-01-18 11:15:00	625.69	544.35	81.34	14.1	959.7	46.05	19.46
2019-01-18 11:30:00	694.86	604.53	90.33	13.82	960.97	54.87	23.93
2019-01-18 11:45:00	693.54	603.38	90.16	12.78	940.04	50.6	23.46
2019-01-18 12:00:00	594.63	517.33	77.3	13.02	960.62	46.29	23.38
2019-01-18 12:15:00	718.59	625.18	93.42	16.09	924.56	42.97	23.72
2019-01-18 12:30:00	695.22	604.84	90.38	16.82	995.45	45.72	22.32
2019-01-18 12:45:00	717.58	624.29	93.29	14.24	965.75	46.98	26.51
2019-01-18 13:00:00	766.57	666.92	99.65	17.66	943.13	43.82	22.67
2019-01-18 13:15:00	680.45	591.99	88.46	17.94	984.17	38.87	22.73
2019-01-18 13:30:00	692.87	602.8	90.07	16.38	966.05	46.82	25.55
2019-01-18 13:45:00	634.33	551.87	82.46	16.47	975.76	47.02	24.97
2019-01-18 14:00:00	669.46	582.43	87.03	17.75	976.11	41.99	20.56
2019-01-18 14:15:00	658.61	572.99	85.62	15.28	903.26	37.83	19.41
2019-01-18 14:30:00	594.16	516.92	77.24	15.27	922.08	39.82	17.55
2019-01-18 14:45:00	512.23	445.64	66.59	15.35	961.34	42.56	16.52
2019-01-18 15:00:00	398.28	346.51	51.78	14.62	927.39	41.08	16.94
2019-01-18 15:15:00	413.48	359.73	53.75	15.74	978.99	50.85	12.6
2019-01-18 15:30:00	382.94	333.16	49.78	17.11	949.08	49.04	11.13
2019-01-18 15:45:00	336.54	292.79	43.75	14.33	909.35	53.72	9.6
2019-01-18 16:00:00	282.72	245.96	36.75	14.12	979.51	55.73	7.99
2019-01-18 16:15:00	200.83	174.72	26.11	16.31	918.02	51.68	6.76
2019-01-18 16:30:00	128.5	111.8	16.71	15.29	931.43	55.56	4.24
2019-01-18 16:45:00	93.1	80.99	12.1	14	995.68	54.93	2.9
2019-01-18 17:00:00	40.39	35.14	5.25	15.47	922.24	54.91	1.63
2019-01-18 17:15:00	14.42	12.54	1.87	14.98	993.36	65.59	0.45
2019-01-18 17:30:00	0	0	0	13.24	965.97	64.25	0
2019-01-18 17:45:00	0	0	0	11.53	957.23	69.08	0
2019-01-18 18:00:00	0	0	0	11.47	924	63.78	0
2019-01-18 18:15:00	0	0	0	10.29	957.49	62.29	0
2019-01-18 18:30:00	0	0	0	8.89	977.63	70.48	0
2019-01-18 18:45:00	0	0	0	7.96	949.01	73.86	0
2019-01-18 19:00:00	0	0	0	7.79	958.38	77.35	0
2019-01-18 19:15:00	0	0	0	6.62	939.6	78.68	0
2019-01-18 19:30:00	0	0	0	5.87	905.91	81.44	0
2019-01-18 19:45:00	0	0	0	5.92	925.28	77	0
2019-01-18 20:00:00	0	0	0	5.29	918.8	87.81	0
2019-01-18 20:15:00	0	0	0	5.37	939.61	81.57	0
2019-01-18 20:30:00	0	0	0	4.56	954.94	91.07	0
2019-01-18 20:45:00	0	0	0	4.53	916.85	96.97	0
2019-01-18 21:00:00	0	0	0	3.94	958.42	93.36	0
2019-01-18 21:15:00	0	0	0	3.62	913.34	90.88	0
2019-01-18 21:30:00	0	0	0	2.93	933.38	86.65	0
2019-01-18 21:45:00	0	0	0	3.3	967.08	95.79	0
2019-01-18 22:00:00	0	0	0	2.59	965.71	84.52	0
2019-01-18 22:15:00	0	0	0	2.27	923.37	100	0
2019-01-18 22:30:00	0	0	0	2.27	964.46	96.13	0
2019-01-18 22:45:00	0	0	0	2.17	976.09	86.82	0
2019-01-18 23:00:00	0	0	0	2.05	949.04	93.21	0
2019-01-18 23:15:00	0	0	0	2.09	946.87	100	0
2019-01-18 23:30:00	0	0	0	1.93	908.35	100	0
2019-01-18 23:45:00	0	0	0	1.58	958.33	100	0
2019-01-19	0	0	0	1.3	982.21	99.82	0
2019-01-19 00:15:00	0	0	0	1.26	916.57	94.06	0
2019-01-19 00:30:00	0	0	0	1.35	950.68	84.06	0
2019-01-19 00:45:00	0	0	0	1.14	908.71	88.55	0
2019-01-19 01:00:00	0	0	0	1.06	913.88	81.19	0
2019-01-19 01:15:00	0	0	0	1.04	934.43	88.91	0
2019-01-19 01:30:00	0	0	0	1.04	939.84	88.24	0
2019-01-19 01:45:00	0	0	0	1.19	979.94	91.5	0
2019-01-19 02:00:00	0	0	0	1.08	997.94	82.6	0
2019-01-19 02:15:00	0	0	0	1.1	928.52	85.49	0
2019-01-19 02:30:00	0	0	0	1.03	993.27	88.06	0
2019-01-19 02:45:00	0	0	0	0.99	918.5	97.16	0
2019-01-19 03:00:00	0	0	0	1.02	978.95	85.57	0
2019-01-19 03:15:00	0	0	0	0.85	949.84	88.83	0
2019-01-19 03:30:00	0	0	0	0.87	938.07	85.02	0
2019-01-19 03:45:00	0	0	0	1	907.28	91.47	0
2019-01-19 04:00:00	0	0	0	0.97	987.79	81.96	0
2019-01-19 04:15:00	0	0	0	0.85	930.31	96.56	0
2019-01-19 04:30:00	0	0	0	0.78	1001.5	96.71	0
2019-01-19 04:45:00	0	0	0	0.8	964.11	89.81	0
2019-01-19 05:00:00	0	0	0	0.84	971.83	84.98	0
2019-01-19 05:15:00	0	0	0	0.85	943.87	89.75	0
2019-01-19 05:30:00	0	0	0	0.94	950.26	83.8	0
2019-01-19 05:45:00	0	0	0	1.06	937.57	82.38	0
2019-01-19 06:00:00	0	0	0	1.18	988.39	94.72	0
2019-01-19 06:15:00	0	0	0	1.67	960.18	92.82	0
2019-01-19 06:30:00	0	0	0	1.94	925.14	89.63	0
2019-01-19 06:45:00	0	0	0	2.22	937.28	96.77	0
2019-01-19 07:00:00	0	0	0	2.4	955.5	90.03	0
2019-01-19 07:15:00	23.37	20.33	3.04	2.96	963.76	89.52	1.02
2019-01-19 07:30:00	45.16	39.29	5.87	3.28	986.47	96.32	2.23
2019-01-19 07:45:00	92.36	80.36	12.01	3.28	958.31	94.1	3.28
2019-01-19 08:00:00	116.7	101.53	15.17	3.46	926.71	86.2	4.56
2019-01-19 08:15:00	153.11	133.21	19.9	3.94	946.37	76.89	5.88
2019-01-19 08:30:00	225.75	196.4	29.35	5.16	915.97	79.8	7.43
2019-01-19 08:45:00	273.74	238.16	35.59	5.49	918.65	79.87	10.4
2019-01-19 09:00:00	328.8	286.05	42.74	6.09	1003.67	82.25	11.33
2019-01-19 09:15:00	342.13	297.65	44.48	8.44	997.17	78.18	13.45
2019-01-19 09:30:00	383.86	333.96	49.9	8.6	938.65	66.7	13.97
2019-01-19 09:45:00	351.06	305.42	45.64	9.23	914.85	68.68	15.28
2019-01-19 10:00:00	350.8	305.2	45.6	11.58	942.27	68.51	14.18
2019-01-19 10:15:00	379.44	330.11	49.33	10.63	921.59	59.01	14.65
2019-01-19 10:30:00	453.78	394.79	58.99	13.9	953.48	56.85	17.69
2019-01-19 10:45:00	410.32	356.98	53.34	13.16	914.89	57.14	16.39
2019-01-19 11:00:00	511.86	445.32	66.54	14.75	919.65	54.4	16.68
2019-01-19 11:15:00	433.35	377.01	56.33	14.81	937.97	54.31	16.76
2019-01-19 11:30:00	490.27	426.54	63.74	14.26	979.66	59.69	20.09
2019-01-19 11:45:00	442.72	385.17	57.55	13.89	997.05	58.67	18.74
2019-01-19 12:00:00	535.71	466.07	69.64	15.4	967.5	51.77	20.62
2019-01-19 12:15:00	538.54	468.53	70.01	14.66	908.3	56.58	20.42
2019-01-19 12:30:00	530.51	461.54	68.97	13.96	925.74	50.4	18.65
2019-01-19 12:45:00	522.55	454.62	67.93	16.75	916.74	57.46	18.61
2019-01-19 13:00:00	554.43	482.36	72.08	15.94	909.93	48.94	21.7
2019-01-19 13:15:00	518.47	451.07	67.4	14.51	948.41	51.58	20.28
2019-01-19 13:30:00	500.6	435.52	65.08	15.84	933.31	56.14	17.66
2019-01-19 13:45:00	524.09	455.95	68.13	15.53	931.05	56.28	18.28
2019-01-19 14:00:00	489.14	425.55	63.59	15.9	963.41	48.62	18.7
2019-01-19 14:15:00	475.79	413.94	61.85	16.19	919.58	54.78	17.18
2019-01-19 14:30:00	371.9	323.55	48.35	17.1	984.78	51.06	14.22
2019-01-19 14:45:00	369.8	321.73	48.07	16.07	931.61	54.52	11.39
2019-01-19 15:00:00	335.65	292.02	43.63	14.01	956.09	51.32	10.47
2019-01-19 15:15:00	291.07	253.23	37.84	13.44	953.92	55.09	8.77
2019-01-19 15:30:00	253.4	220.45	32.94	13.35	993.34	57.06	9.13
2019-01-19 15:45:00	185.58	161.45	24.13	15.64	970.39	64.2	7.13
2019-01-19 16:00:00	153.45	133.5	19.95	15.53	948.32	59.04	5.21
2019-01-19 16:15:00	120.34	104.7	15.64	15.27	988.14	73.67	4.57
2019-01-19 16:30:00	85.97	74.79	11.18	12.74	977.76	62.39	2.8
2019-01-19 16:45:00	60.72	52.82	7.89	14.29	993.19	70.38	1.99
2019-01-19 17:00:00	28.29	24.61	3.68	14.15	960.41	79.28	0.96
2019-01-19 17:15:00	0	0	0	13.98	932.51	77.79	0
2019-01-19 17:30:00	0	0	0	12.74	967.19	78.6	0
2019-01-19 17:45:00	0	0	0	13.59	969.82	75.46	0
2019-01-19 18:00:00	0	0	0	11.81	949.61	69.71	0
2019-01-19 18:15:00	0	0	0	12.17	970.56	80.08	0
2019-01-19 18:30:00	0	0	0	11.65	922.53	76.19	0
2019-01-19 18:45:00	0	0	0	11.46	941.87	70.02	0
2019-01-19 19:00:00	0	0	0	11.23	935.97	75.95	0
2019-01-19 19:15:00	0	0	0	10.84	943.5	74.42	0
2019-01-19 19:30:00	0	0	0	8.89	933.31	76.57	0
2019-01-19 19:45:00	0	0	0	10.65	994.85	77.69	0
2019-01-19 20:00:00	0	0	0	10.55	976.05	76.93	0
2019-01-19 20:15:00	0	0	0	9.22	940.55	74.09	0
2019-01-19 20:30:00	0	0	0	10.21	929	82.31	0
2019-01-19 20:45:00	0	0	0	9.92	954.49	87	0
2019-01-19 21:00:00	0	0	0	7.85	975.54	85.47	0
2019-01-19 21:15:00	0	0	0	9.6	993.76	80.66	0
2019-01-19 21:30:00	0	0	0	9.63	967.72	84.15	0
2019-01-19 21:45:00	0	0	0	8.01	981.1	91.96	0
2019-01-19 22:00:00	0	0	0	8.98	978.68	86.32	0
2019-01-19 22:15:00	0	0	0	7.51	945.83	77.94	0
2019-01-19 22:30:00	0	0	0	9.01	923.25	94.01	0
2019-01-19 22:45:00	0	0	0	8.25	939.5	88.27	0
2019-01-19 23:00:00	0	0	0	8.65	985.97	89.65	0
2019-01-19 23:15:00	0	0	0	8.64	977.06	78.08	0
2019-01-19 23:30:00	0	0	0	7.61	967.92	96.09	0
2019-01-19 23:45:00	0	0	0	7.86	948.89	77.99	0
2019-01-20	0	0	0	9.63	949.71	79.44	0
2019-01-20 00:15:00	0	0	0	10.5	983.51	79.9	0
2019-01-20 00:30:00	0	0	0	9.86	980.23	88.02	0
2019-01-20 00:45:00	0	0	0	9.96	1005.09	96.11	0
2019-01-20 01:00:00	0	0	0	8.79	994.64	90.03	0
2019-01-20 01:15:00	0	0	0	8.07	1002.64	89.99	0
2019-01-20 01:30:00	0	0	0	9.36	968.8	94.32	0
2019-01-20 01:45:00	0	0	0	8.93	936.12	91.97	0
2019-01-20 02:00:00	0	0	0	9.42	968.19	85.91	0
2019-01-20 02:15:00	0	0	0	10.05	932.49	90.7	0
2019-01-20 02:30:00	0	0	0	9.93	941.78	93.09	0
2019-01-20 02:45:00	0	0	0	8.14	947.47	88.63	0
2019-01-20 03:00:00	0	0	0	9.81	994.71	92.98	0
2019-01-20 03:15:00	0	0	0	9.28	1013.97	87.74	0
2019-01-20 03:30:00	0	0	0	8.23	964.33	95.23	0
2019-01-20 03:45:00	0	0	0	9.49	974.72	83.7	0
2019-01-20 04:00:00	0	0	0	8.44	991.93	89.4	0
2019-01-20 04:15:00	0	0	0	9.05	951.76	85.97	0
2019-01-20 04:30:00	0	0	0	9.25	950.22	89.6	0
2019-01-20 04:45:00	0	0	0	8.5	939.66	93.65	0
2019-01-20 05:00:00	0	0	0	8.92	1001.4	95.94	0
2019-01-20 05:15:00	0	0	0	7.91	965.68	96.79	0
2019-01-20 05:30:00	0	0	0	9	929.55	89	0
2019-01-20 05:45:00	0	0	0	8.4	949.8	80.69	0
2019-01-20 06:00:00	0	0	0	9.22	973.91	80.86	0
2019-01-20 06:15:00	0	0	0	8.17	950.88	88.33	0
2019-01-20 06:30:00	0	0	0	9.82	942.74	85.81	0
2019-01-20 06:45:00	0	0	0	8.71	973.94	93.59	0
2019-01-20 07:00:00	0	0	0	8.95	1010.02	92.95	0
2019-01-20 07:15:00	10.08	8.77	1.31	8.72	1011.72	80.56	0.58
2019-01-20 07:30:00	24.8	21.57	3.22	10.39	941.04	85.53	1.2
2019-01-20 07:45:00	39.55	34.41	5.14	9.02	981.45	90.57	1.82
2019-01-20 08:00:00	59.21	51.52	7.7	9.48	940.08	85.08	2.54
2019-01-20 08:15:00	72.39	62.98	9.41	9.48	983.14	89.37	3.72
2019-01-20 08:30:00	86.05	74.86	11.19	11.51	961.17	81.81	4.47
2019-01-20 08:45:00	99.03	86.16	12.87	11.73	994.41	88.81	5.18
2019-01-20 09:00:00	125.21	108.94	16.28	12.1	999.13	72.55	5.65
2019-01-20 09:15:00	117.51	102.23	15.28	10.59	1004.48	81.12	5.13
2019-01-20 09:30:00	128.32	111.64	16.68	11.51	1014.68	86.7	6.3
2019-01-20 09:45:00	135.72	118.08	17.64	12.35	990.09	73.91	5.76
2019-01-20 10:00:00	146.73	127.66	19.07	12.9	954.09	84.7	6.18
2019-01-20 10:15:00	138.5	120.49	18	10.72	989.01	80.03	5.38
2019-01-20 10:30:00	133.39	116.05	17.34	11.66	967.27	67.75	5.94
2019-01-20 10:45:00	135.55	117.93	17.62	10.59	937.17	81.89	5.96
2019-01-20 11:00:00	117.37	102.11	15.26	13.4	945.25	68.45	5.21
2019-01-20 11:15:00	109.59	95.34	14.25	11.62	957.55	67.66	5.65
2019-01-20 11:30:00	127.95	111.32	16.63	11.79	982.16	81.92	5.44
2019-01-20 11:45:00	101.91	88.67	13.25	12.6	1003.5	78.67	5.41
2019-01-20 12:00:00	113.42	98.68	14.74	10.34	981.53	89.28	4.81
2019-01-20 12:15:00	110.52	96.15	14.37	10.87	939.96	78.04	5.21
2019-01-20 12:30:00	96.21	83.71	12.51	9.86	922.29	86.15	5.03
2019-01-20 12:45:00	80.88	70.36	10.51	10.2	937.9	81.05	5.12
2019-01-20 13:00:00	84.68	73.67	11.01	11.26	965.24	93.08	4.14
2019-01-20 13:15:00	84.1	73.17	10.93	10.57	977.57	83.03	4.43
2019-01-20 13:30:00	78.55	68.34	10.21	10.3	958.88	96.28	4.39
2019-01-20 13:45:00	67.48	58.71	8.77	11.2	989.52	85.36	4.34
2019-01-20 14:00:00	61.3	53.33	7.97	9.8	951.01	97.97	3.29
2019-01-20 14:15:00	63.55	55.29	8.26	9.64	966.38	86.41	3.58
2019-01-20 14:30:00	64.84	56.41	8.43	8.75	923.07	100	2.93
2019-01-20 14:45:00	51.98	45.22	6.76	9.44	1016.22	92.86	2.98
2019-01-20 15:00:00	53.22	46.3	6.92	9.74	999.59	100	2.23
2019-01-20 15:15:00	46.66	40.6	6.07	9.05	926.08	95.33	1.84
2019-01-20 15:30:00	43.88	38.18	5.7	9.04	948.92	100	1.87
2019-01-20 15:45:00	35.34	30.75	4.59	10.41	930.32	100	1.39
2019-01-20 16:00:00	34.74	30.23	4.52	9.44	920.38	85.37	1.25
2019-01-20 16:15:00	24.8	21.57	3.22	10.34	984.3	85.59	0.91
2019-01-20 16:30:00	17.39	15.13	2.26	8.78	1007.9	88.98	0.69
2019-01-20 16:45:00	11.22	9.77	1.46	10.1	933.76	93.59	0.47
2019-01-20 17:00:00	0	0	0	9.72	950.45	88.34	0
2019-01-20 17:15:00	0	0	0	9.64	987.91	88.16	0
2019-01-20 17:30:00	0	0	0	8.79	981.79	96.81	0
2019-01-20 17:45:00	0	0	0	9.61	985.55	93.01	0
2019-01-20 18:00:00	0	0	0	9.15	935.41	87.14	0
2019-01-20 18:15:00	0	0	0	7.78	998.99	90.6	0
2019-01-20 18:30:00	0	0	0	7.82	1014.81	87.44	0
2019-01-20 18:45:00	0	0	0	8.42	937.89	97.91	0
2019-01-20 19:00:00	0	0	0	7.45	981.93	90.78	0
2019-01-20 19:15:00	0	0	0	7.71	1002.08	92.79	0
2019-01-20 19:30:00	0	0	0	7.55	941.47	100	0
2019-01-20 19:45:00	0	0	0	7.28	961.94	97.61	0
2019-01-20 20:00:00	0	0	0	6.64	936.21	86.66	0
2019-01-20 20:15:00	0	0	0	5.98	965.12	94.95	0
2019-01-20 20:30:00	0	0	0	6.9	990.03	88.68	0
2019-01-20 20:45:00	0	0	0	6.63	984.24	90.26	0
2019-01-20 21:00:00	0	0	0	6.56	993.2	87.98	0
2019-01-20 21:15:00	0	0	0	5.63	999.7	86.48	0
2019-01-20 21:30:00	0	0	0	6.05	928.24	100	0
2019-01-20 21:45:00	0	0	0	6.13	1016.37	95.17	0
2019-01-20 22:00:00	0	0	0	5.27	1004.38	97.78	0
2019-01-20 22:15:00	0	0	0	5.84	924.06	100	0
2019-01-20 22:30:00	0	0	0	6.24	989.38	98.56	0
2019-01-20 22:45:00	0	0	0	5.65	937.44	92.1	0
2019-01-20 23:00:00	0	0	0	5.51	981.23	91.32	0
2019-01-20 23:15:00	0	0	0	5.09	961.82	100	0
2019-01-20 23:30:00	0	0	0	6.04	978.77	85.24	0
2019-01-20 23:45:00	0	0	0	5.72	994.23	92.02	0
2019-01-21	0	0	0	4.52	935.29	81.53	0
2019-01-21 00:15:00	0	0	0	5.25	912.29	81.59	0
2019-01-21 00:30:00	0	0	0	5.5	927.55	89.59	0
2019-01-21 00:45:00	0	0	0	5.94	971.24	76	0
2019-01-21 01:00:00	0	0	0	4.79	961.24	76.65	0
2019-01-21 01:15:00	0	0	0	5.5	934.64	88.55	0
2019-01-21 01:30:00	0	0	0	4.68	910.55	75.15	0
2019-01-21 01:45:00	0	0	0	4.98	930.61	77.05	0
2019-01-21 02:00:00	0	0	0	5.39	950.86	87.6	0
2019-01-21 02:15:00	0	0	0	5.42	967.8	86.17	0
2019-01-21 02:30:00	0	0	0	5.45	922.51	81.91	0
2019-01-21 02:45:00	0	0	0	5.34	998.73	84.87	0
2019-01-21 03:00:00	0	0	0	4.8	942.14	72.62	0
2019-01-21 03:15:00	0	0	0	4.81	913.49	72.88	0
2019-01-21 03:30:00	0	0	0	4.25	971.83	83.16	0
2019-01-21 03:45:00	0	0	0	4.92	912.35	75.15	0
2019-01-21 04:00:00	0	0	0	5.11	973.64	78.96	0
2019-01-21 04:15:00	0	0	0	4.06	939.44	80.9	0
2019-01-21 04:30:00	0	0	0	4.04	914.68	81.14	0
2019-01-21 04:45:00	0	0	0	4.26	953.99	77.3	0
2019-01-21 05:00:00	0	0	0	4.44	988.35	83.07	0
2019-01-21 05:15:00	0	0	0	3.97	921.21	74.18	0
2019-01-21 05:30:00	0	0	0	4.77	1004.98	70.91	0
2019-01-21 05:45:00	0	0	0	4.76	918.08	70.04	0
2019-01-21 06:00:00	0	0	0	4.42	971.98	66.61	0
2019-01-21 06:15:00	0	0	0	4.96	933.36	76.4	0
2019-01-21 06:30:00	0	0	0	4.56	966.01	67.96	0
2019-01-21 06:45:00	0	0	0	4.07	917.46	74.57	0
2019-01-21 07:00:00	0	0	0	4.18	974.4	67.61	0
2019-01-21 07:15:00	15.25	13.27	1.98	4.53	975.93	76.05	0.63
2019-01-21 07:30:00	36.38	31.65	4.73	4.52	948.98	73.05	1.47
2019-01-21 07:45:00	66.59	57.93	8.66	4.64	912.79	78.18	2.64
2019-01-21 08:00:00	109.25	95.05	14.2	4.14	923.85	74.78	3.8
2019-01-21 08:15:00	156.52	136.18	20.35	4.71	995.56	68.24	4.66
2019-01-21 08:30:00	183.33	159.5	23.83	4.87	970.77	78.15	5.9
2019-01-21 08:45:00	207.21	180.27	26.94	4.58	925.88	71.66	8.23
2019-01-21 09:00:00	221.94	193.08	28.85	4.96	937.77	70.07	8.18
2019-01-21 09:15:00	308.82	268.67	40.15	5.89	957.25	73.46	9.48
2019-01-21 09:30:00	306.59	266.73	39.86	6.4	952.73	69	11.28
2019-01-21 09:45:00	323.28	281.26	42.03	6.22	950.65	62.83	10.68
2019-01-21 10:00:00	297.48	258.81	38.67	6.68	997.08	64.99	13.3
2019-01-21 10:15:00	331.79	288.66	43.13	8.86	921.63	62.76	12.56
2019-01-21 10:30:00	303.36	263.92	39.44	8.18	990.34	58.4	14.73
2019-01-21 10:45:00	347.25	302.11	45.14	8.45	948.06	51.7	12.83
2019-01-21 11:00:00	315.26	274.28	40.98	9.96	943.92	60.03	15.6
2019-01-21 11:15:00	351.13	305.48	45.65	9.34	968.36	54.6	15.11
2019-01-21 11:30:00	332.51	289.29	43.23	8.32	946.38	57.56	15.93
2019-01-21 11:45:00	333.53	290.17	43.36	9.37	956.47	45.95	14.02
2019-01-21 12:00:00	343.84	299.14	44.7	9.92	941.17	48.22	14.9
2019-01-21 12:15:00	338.93	294.87	44.06	10.31	972.06	52.05	14.51
2019-01-21 12:30:00	379.21	329.91	49.3	9.78	972.82	45.79	15.92
2019-01-21 12:45:00	392.55	341.52	51.03	10.38	999.62	47.23	15.22
2019-01-21 13:00:00	369.47	321.44	48.03	9.16	963.88	50.51	18.25
2019-01-21 13:15:00	401.32	349.15	52.17	9.69	991.52	45.09	16.94
2019-01-21 13:30:00	366.9	319.2	47.7	10.69	989.95	46.48	14.73
2019-01-21 13:45:00	340.01	295.81	44.2	10.41	916.58	47.51	16.99
2019-01-21 14:00:00	298.05	259.3	38.75	10.72	920.5	39.82	14.86
2019-01-21 14:15:00	307.93	267.9	40.03	10.6	965.09	42.53	12.31
2019-01-21 14:30:00	266.86	232.17	34.69	10.15	978.04	40.7	9.84
2019-01-21 14:45:00	233.75	203.36	30.39	10.8	931.47	45.24	9.28
2019-01-21 15:00:00	216.87	188.67	28.19	10.01	996.01	43.13	6.68
2019-01-21 15:15:00	194.72	169.4	25.31	10.63	989.03	49.3	6.32
2019-01-21 15:30:00	197.19	171.56	25.63	9.83	935.06	45.61	4.92
2019-01-21 15:45:00	138.03	120.09	17.94	8.88	936.02	49.53	3.87
2019-01-21 16:00:00	130.62	113.64	16.98	9.88	964.97	47	3.44
2019-01-21 16:15:00	109.59	95.35	14.25	9.57	958.72	52.59	2.26
2019-01-21 16:30:00	64.26	55.91	8.35	8.26	998.41	51.52	1.75
2019-01-21 16:45:00	45.75	39.8	5.95	9.47	977.84	52.16	1.16
2019-01-21 17:00:00	23.8	20.7	3.09	9.04	966.59	56.73	0.48
2019-01-21 17:15:00	0	0	0	9.69	925.88	64.48	0
2019-01-21 17:30:00	0	0	0	8.81	966.13	66.26	0
2019-01-21 17:45:00	0	0	0	7.77	997.74	64.26	0
2019-01-21 18:00:00	0	0	0	8.03	947.72	60.93	0
2019-01-21 18:15:00	0	0	0	7.79	974.24	66.19	0
2019-01-21 18:30:00	0	0	0	7.23	911.24	59.88	0
2019-01-21 18:45:00	0	0	0	6.3	963.24	59.73	0
2019-01-21 19:00:00	0	0	0	5.2	986.12	72.28	0
2019-01-21 19:15:00	0	0	0	5.74	962.05	67.15	0
2019-01-21 19:30:00	0	0	0	5.31	995.87	61.03	0
[truncated: 67,409 more rows]
