# Supplementary material
Source: PeerJ journal article supplement (doi:10.7717/peerj-cs.3610)
Supplement: Wind_farm_site_1_Nominal_capacity99MW.xlsx [file Wind_farm_site_1_Nominal_capacity99MW.xlsx]

## Sheet: sheet1
Time(year-month-day h:m:s)	Wind speed at height of 10 meters (m/s)	Wind direction at height of 10 meters (˚)	Wind speed at height of 30 meters (m/s)	Wind direction at height of 30 meters (˚)	Wind speed at height of 50 meters (m/s)	Wind direction at height of 50 meters (˚)	Wind speed - at the height of wheel hub (m/s)	Wind speed - at the height of wheel hub (˚)	Air temperature (°C)	Atmosphere (hpa)	Relative humidity (%)	Power (MW)
2019-01-01 00:00:00	2.209	81.317	1.991	74.814	2.094	77.667	2.494	74.5	-13.484	889.867	76.32	0.254383
2019-01-01 00:15:00	1.828	77.46	1.698	75.048	1.757	88.733	1.882	74.367	-13.691	889.575	76.757	0.329703
2019-01-01 00:30:00	2.193	86.7	2.313	84.688	2.344	89.1	2.35	89	-13.766	889.942	76.981	0.296306
2019-01-01 00:45:00	2.654	78.16	2.494	74.939	2.574	87.267	2.808	82.733	-13.691	889.675	76.821	0.18759
2019-01-01 01:00:00	2.249	94.297	2.192	91.14	2.558	96.9	2.924	92.967	-13.447	890.025	74.571	0.081005
2019-01-01 01:15:00	1.974	92.933	1.98	91.921	2.049	97	2.137	100.133	-13.983	889.692	71.808	0.189721
2019-01-01 01:30:00	2.22	105.19	2.336	98.886	2.408	110.533	2.506	103	-14.014	889.967	70.816	0.265041
2019-01-01 01:45:00	1.953	104.733	2.287	98.843	2.507	104.5	2.868	103.7	-14.149	889.45	69.525	0.241593
2019-01-01 02:00:00	2.276	87.833	2.407	84.094	2.541	94.3	2.657	100	-14.116	890	69.824	0.184037
2019-01-01 02:15:00	2.583	62.593	2.718	65.815	2.781	76.333	2.841	82.167	-14.183	889.808	75.029	0.119375
2019-01-01 02:30:00	2.125	83.333	2.957	79.623	2.737	91.3	1.968	85.633	-14.166	889.542	77.312	0.30128
2019-01-01 02:45:00	2.238	98.3	2.113	98.282	1.753	105.3	2.203	103.467	-14.149	890.05	77.035	0.508055
2019-01-01 03:00:00	2.576	105.067	2.352	99.336	2.099	104.2	2.332	103.9	-14.266	889.683	74.261	1.08219
2019-01-01 03:15:00	2.552	109.367	2.137	100.764	1.811	108.8	1.957	102.967	-14.099	889.358	71.36	0.537188
2019-01-01 03:30:00	2.258	107.533	2.036	98.808	1.884	106.2	1.868	99.7	-14.116	888.7	69.643	0.156325
2019-01-01 03:45:00	2.544	106.833	2.012	100.042	1.784	105.567	2.227	100.5	-13.899	889.95	68.501	0.724778
2019-01-01 04:00:00	1.838	103.367	1.317	98.583	1.229	101.6	1.555	107.2	-14.233	890.483	67.467	0.226671
2019-01-01 04:15:00	2.051	76.767	1.977	77.711	1.923	79	1.822	80	-14.249	889.858	67.328	0.218855
2019-01-01 04:30:00	1.576	64.407	1.633	66.143	1.793	72	1.692	74.667	-14.133	890.133	68.075	0.366652
2019-01-01 04:45:00	1.531	94.38	1.792	91.502	1.917	99	2.013	84.433	-14.278	889.933	68.384	0.333966
2019-01-01 05:00:00	1.44	94.28	1.744	92.199	1.678	101.133	2.049	88.4	-14.641	890.217	68.011	0.328282
2019-01-01 05:15:00	2.174	75.353	2.274	75.561	2.444	82	2.163	88.5	-14.828	889.917	69.024	0.301991
2019-01-01 05:30:00	2.261	97.527	3.04	91.358	2.721	101.367	3.054	104.033	-14.599	890.258	69.717	0.297017
2019-01-01 05:45:00	1.376	70.308	1.588	67.462	1.987	74.733	2.144	73.667	-14.481	890.033	70.784	0.267173
2019-01-01 06:00:00	1.473	75.58	1.699	71.661	2.187	79	2.567	72.333	-14.433	889.85	71.168	0.153482
2019-01-01 06:15:00	2.057	34.532	2.056	34.496	2.297	46.7	2.348	57.4	-14.724	889.842	71.189	0.266463
2019-01-01 06:30:00	1.834	46.267	1.677	46.142	2.186	56.833	2.579	56.167	-14.474	889.8	70.4	0.04974
2019-01-01 06:45:00	1.917	97.82	2.332	94.707	2.974	99.7	3.361	90.567	-14.291	889.975	68.48	0.674328
2019-01-01 07:00:00	1.122	110	1.073	105.682	1.806	97.7	2.432	94.733	-14.266	889.767	66.549	1.22715
2019-01-01 07:15:00	0.977	116.36	1.313	96.23	1.662	96.533	1.908	95.867	-13.841	889.75	64.821	0.508766
2019-01-01 07:30:00	2.694	113.333	2.717	102.112	2.784	106.233	3.076	102.467	-13.983	889.9	63.947	0.95358
2019-01-01 07:45:00	2.499	95.043	2.598	91.68	2.671	96.933	2.725	92.8	-13.68	889.867	62.859	0.542162
2019-01-01 08:00:00	1.913	87.733	1.867	88.837	1.797	97.967	1.925	97.133	-13.916	889.383	61.984	0.241593
2019-01-01 08:15:00	1.297	88.65	1.214	85.23	1.263	90	1.477	86	-13.722	889.417	61.365	0.352441
2019-01-01 08:30:00	1.643	78.28	1.513	80.258	1.634	81.467	1.795	86.033	-13.812	889.725	61.675	0.362389
2019-01-01 08:45:00	1.814	107.503	1.81	104.098	2.113	110.367	2.667	107.7	-13.81	889.908	61.611	0.287069
2019-01-01 09:00:00	2.227	103.157	2.336	102.96	2.407	111.2	2.809	108.2	-13.56	889.792	61.696	0.284227
2019-01-01 09:15:00	1.81	96.757	1.762	90.972	1.941	99.167	2.39	99.9	-13.747	889.658	62.251	0.181905
2019-01-01 09:30:00	2.619	73.693	2.358	71.625	2.366	78.2	2.441	86	-13.503	889.925	62.144	0.131455
2019-01-01 09:45:00	2.729	69.217	2.628	62.084	2.481	68.767	2.835	68.067	-13.71	889.942	67.787	0.121507
2019-01-01 10:00:00	2.26	56.47	2.121	52.95	2.224	61.467	2.408	56.867	-13.728	889.767	76.192	0.265752
2019-01-01 10:15:00	3.067	77.577	2.988	72.836	3.049	77.867	3.252	72.567	-13.597	889.854	82.315	0.795835
2019-01-01 10:30:00	2.638	84.273	2.55	79.24	2.563	84.467	2.58	77.467	-13.466	889.854	84.117	0.588349
2019-01-01 10:45:00	2.635	92.683	2.274	89.67	2.234	89.7	2.063	86.267	-13.672	889.988	84.203	0.553532
2019-01-01 11:00:00	1.958	94.503	1.6	87.088	1.596	91.2	1.589	98.567	-13.334	889.871	81.781	0.2757
2019-01-01 11:15:00	1.269	107.687	1.133	100.618	1.149	102.767	1.102	106.067	-13.19	889.525	79.573	0.245146
2019-01-01 11:30:00	1.636	66.913	1.564	65.456	1.379	75.333	1.448	75.167	-13.203	889.933	76.939	0.35102
2019-01-01 11:45:00	2.378	82.067	2.393	78.007	2.45	82.3	2.461	77	-12.72	889.858	74.912	0.339651
2019-01-01 12:00:00	2.687	103.5	2.601	93.356	2.503	94.767	2.75	93.067	-12.703	890.075	72.96	0.299149
2019-01-01 12:15:00	2.888	89.933	3.071	85.013	3.092	89.2	3.205	86.6	-12.57	889.533	69.973	0.46329
2019-01-01 12:30:00	3.177	84.7	3.245	78.421	3.372	82.567	3.719	77.433	-12.536	889.392	67.189	2.07059
2019-01-01 12:45:00	3.314	81.132	3.459	71.387	3.522	74.433	3.59	69.667	-12.386	890.192	64.469	1.79205
2019-01-01 13:00:00	2.756	78.667	2.813	72.492	3.078	78.6	3.388	73.4	-12.316	889.683	65.824	1.27334
2019-01-01 13:15:00	2.487	70.896	2.357	64.337	2.459	72.267	2.563	67.2	-11.899	889.825	64.352	0.439841
2019-01-01 13:30:00	3.21	67.422	3.388	65.041	3.68	70.633	3.571	67.7	-11.278	889.825	63.627	1.03387
2019-01-01 13:45:00	1.993	80.812	2.157	71.813	2.3	80.233	2.365	79.8	-11.411	890.125	62.496	0.972055
2019-01-01 14:00:00	2.14	64.878	2.3	57.521	2.526	63.033	2.805	57.233	-11.378	889.917	66.133	0.340361
2019-01-01 14:15:00	2.943	68.45	3.031	59.744	3.013	68.033	2.905	63.233	-11.445	889.983	66.837	0.548558
2019-01-01 14:30:00	2.37	62.478	2.374	57.272	2.713	70.067	2.957	72.067	-11.511	889.75	67.925	0.169115
2019-01-01 14:45:00	1.907	63.694	1.902	60.296	1.91	61.933	2.013	62.9	-11.445	890.133	68.416	0.154904
2019-01-01 15:00:00	3.155	53.78	2.893	45.962	3.026	52.533	3.104	53.833	-11.174	889.792	69.088	0.059688
2019-01-01 15:15:00	3.432	35.913	3.31	34.052	3.203	39.733	3.086	39	-11.878	889.975	72.853	0.182616
2019-01-01 15:30:00	3.228	24.594	3.24	23.524	3.197	29.967	3.306	27.767	-12.236	889.867	74.443	0.638089
2019-01-01 15:45:00	3.24	25.227	3.138	21.696	3.328	25.367	3.412	23.167	-12.386	889.758	76.341	0.960686
2019-01-01 16:00:00	3.127	35.976	3.037	28.008	3.027	32	3.058	28.567	-12.636	890	77.067	0.818573
2019-01-01 16:15:00	3.281	29.437	3.044	19.921	3.159	25	3.168	19.7	-12.67	889.925	78.603	0.16272
2019-01-01 16:30:00	2.557	12.549	2.407	9.637	2.531	13.333	2.593	12.333	-12.72	889.808	78.645	0.07461
2019-01-01 16:45:00	2.477	48.083	2.372	41.368	2.575	43.167	2.479	32.633	-12.62	889.983	79.403	0.285648
2019-01-01 17:00:00	1.564	48.717	1.496	48.241	1.55	52.533	1.586	49	-12.486	890	79.115	0.36381
2019-01-01 17:15:00	0	39.05	0	48.116	0	55.8	0	49	-12.62	890.042	78.944	0.341072
2019-01-01 17:30:00	0.056	39.05	0	48.134	0	55.967	0	48.867	-12.686	890.008	78.144	0.341072
2019-01-01 17:45:00	0.073	39.05	0	48.129	0	55.933	0.04	49	-12.67	889.867	78.101	0.341072
2019-01-01 18:00:00	0	39.05	0	48.13	0	56	0	49	-12.853	889.875	79.029	0.341072
2019-01-01 18:15:00	0	39.05	0	48.122	0	55.9	0	49	-12.67	889.758	80.149	0.341072
2019-01-01 18:30:00	0	39.05	0	48.135	0	55.967	0	49	-12.786	889.583	81.237	0.341072
2019-01-01 18:45:00	0.48	39.05	0.276	48.126	0.213	55.933	0	49	-12.703	889.946	82.219	0.341072
2019-01-01 19:00:00	0.712	39.683	0.233	48.109	0	62.567	0.39	48.867	-13.086	889.692	83.328	0.341072
2019-01-01 19:15:00	0.379	33.539	0.19	48.124	0.063	55.9	0	49	-13.186	890.154	83.712	0.341072
2019-01-01 19:30:00	1.52	56.05	1.273	47.252	1.314	57.033	1.293	49	-12.97	889.608	84.16	0.336809
2019-01-01 19:45:00	0.867	45.055	0.443	42.136	0.379	55	0.322	49	-13.122	890.104	84.736	0.328282
2019-01-01 20:00:00	1.069	72.135	0.91	50.079	0.503	81.667	1.102	49.067	-13.484	889.858	85.205	0.335387
2019-01-01 20:15:00	1.452	75.23	1.265	79.923	1.058	92.433	1.234	49	-13.447	889.804	86.869	0.339651
2019-01-01 20:30:00	1.708	65.483	1.652	62.124	1.6	80.067	1.537	79.033	-13.672	889.483	87.339	0.341072
2019-01-01 20:45:00	1.152	62.2	1.445	59.141	1.564	78	1.592	79	-14.049	890.379	86.485	0.33823
2019-01-01 21:00:00	0.987	63.173	1.281	66.264	1.329	92.433	1.302	79.033	-14.099	889.746	87.616	0.341072
2019-01-01 21:15:00	0	69.387	0.04	63.076	0.475	86.067	0.188	79.033	-14.516	889.55	87.381	0.341072
2019-01-01 21:30:00	0	68.2	0	62.112	0	82.967	0	79	-14.891	889.883	86.293	0.339651
2019-01-01 21:45:00	0	68.293	0	62.609	0	82.867	0	79	-14.599	889.742	87.339	0.328282
2019-01-01 22:00:00	0	68.2	0	62.479	0	82.867	0	81.233	-14.891	889.996	87.488	0.335387
2019-01-01 22:15:00	0	153.047	0	62.966	0	83	0.723	83	-14.787	889.817	87.424	0.342493
2019-01-01 22:30:00	0.646	182.347	0	75.036	0	83.8	1.4	83.2	-14.558	889.979	86.827	0.343914
2019-01-01 22:45:00	0.472	181.007	0	107.248	0	124.933	1.807	84.8	-14.499	889.738	86.635	0.335387
2019-01-01 23:00:00	0.555	180.307	0	107.252	0	125	1.453	85.033	-14.362	890.033	86.101	0.341072
2019-01-01 23:15:00	0	179.867	0	107.229	0	124.933	1.51	85	-14.266	889.779	85.568	0.342493
2019-01-01 23:30:00	0	180.64	0	107.265	0	125	1.374	84.9	-14.62	889.708	85.995	0.342493
2019-01-01 23:45:00	0	180.747	0	107.271	0	125	1.334	85	-14.249	889.817	85.973	0.342493
2019-01-02 00:00:00	0	180.8	0	107.273	0	125	1.382	85	-14.116	890.112	85.717	0.341072
2019-01-02 00:15:00	0	180.8	0	107.295	0	124	0.813	85.033	-14.049	890.171	85.675	0.342493
2019-01-02 00:30:00	0	180.653	0	107.237	0	123.867	1.235	85	-14.495	890.133	85.483	0.341072
2019-01-02 00:45:00	0	180.56	0	107.345	0	124.1	1.084	84.833	-14.641	889.908	85.888	0.341072
2019-01-02 01:00:00	0	180.467	0	107.337	0	124	0.104	84.9	-14.891	889.867	85.781	0.341072
2019-01-02 01:15:00	0	180.6	0	107.279	0	124.033	0	85	-14.749	890.35	85.419	0.342493
2019-01-02 01:30:00	0	207.4	0	111.769	0	124.967	0.85	84.9	-15.141	889.879	85.867	0.341072
2019-01-02 01:45:00	0.958	197.627	0	162.12	0	125	1.133	137	-15.083	890.092	85.525	0.341072
2019-01-02 02:00:00	0.027	210.5	0	166.535	0	125.067	0	136.867	-15.091	890.004	85.525	0.341072
2019-01-02 02:15:00	0.978	227.333	0	166.5	0	125.067	0	136.867	-15.424	889.996	84.779	0.341072
2019-01-02 02:30:00	1.613	226.387	0	171.082	0	125.2	0	137.067	-16.339	889.833	84.224	0.342493
2019-01-02 02:45:00	1.145	235.187	0	192.448	0	125.333	0	137.433	-15.862	890.183	84.843	0.341072
2019-01-02 03:00:00	1.534	219.6	0	192.364	0	131.8	0.208	138.733	-15.808	890.017	84.949	0.343914
2019-01-02 03:15:00	1.793	226.533	0	195.53	0	203.5	0	179	-15.341	890.271	85.184	0.342493
2019-01-02 03:30:00	1.679	224.333	0	195.482	0	203.7	0	179	-15.174	890.3	84.608	0.342493
2019-01-02 03:45:00	1.304	217.767	0	195.576	0	203.567	0	179	-15.474	889.883	84.928	0.341072
2019-01-02 04:00:00	1.257	219.9	0	195.53	0	203.6	0	178.967	-14.991	890.242	85.504	0.343914
2019-01-02 04:15:00	0.156	217.333	0	195.595	0	203.267	0	179	-15.274	889.929	85.269	0.342493
2019-01-02 04:30:00	0.143	212.8	0	195.525	0	203.033	0	179	-15.391	889.921	84.672	0.341072
2019-01-02 04:45:00	0.482	212.8	0	193.448	0	203.1	0	179	-15.574	890.017	84.011	0.342493
2019-01-02 05:00:00	0	206.4	0	149.81	0	130.933	0.44	178.933	-15.308	889.367	84.843	0.343914
2019-01-02 05:15:00	1.411	165.833	0	125.221	0.549	118	0	178	-15.241	889.888	85.184	0.348178
2019-01-02 05:30:00	1.205	174.567	0	125.209	0	118.267	0.379	178	-15.574	889.842	84.757	0.348178
2019-01-02 05:45:00	1.378	166.467	0	125.263	0.073	118.2	0.04	176	-15.741	889.992	84.757	0.346757
2019-01-02 06:00:00	0.465	160.033	0	124.766	0.27	108	0.48	176	-15.708	889.933	85.547	0.352441
2019-01-02 06:15:00	1.173	168.2	0	125.22	0.127	113	1.156	175.633	-15.691	889.8	85.397	0.356704
2019-01-02 06:30:00	0.389	188.267	0	147.526	0	112.867	0	175.133	-15.558	889.904	85.419	0.341072
2019-01-02 06:45:00	0	202.4	0	147.498	0	112.967	0	175.2	-15.641	889.729	85.419	0.345335
2019-01-02 07:00:00	0.12	231.067	0	147.68	0	113	0	175.1	-15.824	889.825	84.928	0.343914
2019-01-02 07:15:00	0.406	219.667	0	147.484	0	112.933	0	175.1	-15.558	890.121	85.013	0.345335
2019-01-02 07:30:00	1.08	234	0	147.429	0	112.9	0	175.067	-15.891	889.533	84.715	0.343914
2019-01-02 07:45:00	0.958	237.367	0	147.568	0	113	0	175.167	-15.914	889.938	84.629	0.345335
2019-01-02 08:00:00	1.556	237.367	0	147.552	0	113.033	0	174.967	-15.674	889.733	85.355	0.345335
2019-01-02 08:15:00	1.886	216.7	0	164.002	0.83	167.1	1.344	174.9	-14.891	890.275	86.08	0.345335
2019-01-02 08:30:00	2.15	230.647	0	193.949	0.13	171.967	0	175.1	-14.937	890.112	85.013	0.348178
2019-01-02 08:45:00	1.558	224.1	0	195.523	0	172	0	175	-15.358	889.904	84.971	0.343914
2019-01-02 09:00:00	1.196	219.933	0	195.465	0	172	0	175.233	-14.891	889.542	85.44	0.341072
2019-01-02 09:15:00	1.04	219.72	0	195.453	0	172	0	175.1	-14.891	889.775	84.949	0.345335
2019-01-02 09:30:00	0.898	219.56	0	195.465	0	172	0	175.133	-14.624	890.012	85.717	0.345335
2019-01-02 09:45:00	0.093	220.6	0	195.441	0	172	0.285	175.033	-13.595	890.042	85.504	0.345335
2019-01-02 10:00:00	0	220.8	0	195.396	0	172.033	0	175	-14.183	889.933	84.821	0.343914
2019-01-02 10:15:00	0	220.2	0	195.496	0	172	0	174.867	-13.086	889.754	85.461	0.343914
2019-01-02 10:30:00	0.835	217.5	0	193.348	0	171.4	1.017	174.967	-11.261	889.962	85.141	0.343914
2019-01-02 10:45:00	1.154	207.34	0	188.646	0	170.767	0.423	175.133	-10.834	890.029	84.501	0.341072
2019-01-02 11:00:00	0.974	207.08	0	188.636	0	170.8	0	175.1	-9.891	890.038	84.373	0.345335
2019-01-02 11:15:00	1.942	212.213	0	188.728	0	171	0.047	175.033	-9.683	890.262	83.712	0.342493
2019-01-02 11:30:00	1.304	214.4	0	188.716	0	171	0	175	-9.291	889.804	83.307	0.342493
2019-01-02 11:45:00	0.14	214.593	0	188.542	0	170.967	0	175.033	-7.294	889.767	78.165	0.341072
2019-01-02 12:00:00	0	215	0	188.413	0	171	0	174.933	-6.445	889.567	69.451	0.341072
2019-01-02 12:15:00	0	214.067	0	188.593	0	170.833	0	175.1	-3.723	889.633	68.48	0.341072
2019-01-02 12:30:00	0	213.973	0	188.597	0	170.9	0	175.1	-3.875	889.8	61.227	0.341072
2019-01-02 12:45:00	0	214.2	0	188.464	0	171	0	175	-2.818	889.975	53.099	0.341072
2019-01-02 13:00:00	0	214.107	0	188.597	0.077	171	0	175	-3.097	889.475	51.712	0.341072
2019-01-02 13:15:00	0	214	0	188.85	0	171	0	175	-3.606	889.55	48.064	0.329703
2019-01-02 13:30:00	0	214	0	188.611	0	171	0	175.067	-3.823	889.792	47.285	0.328282
2019-01-02 13:45:00	0	214.333	0	188.449	0	171	0	175.1	-3.656	890.517	47.456	0.341072
2019-01-02 14:00:00	0	214.073	0	188.354	0	171.067	0	175.067	-3.742	889.758	47.2	0.341072
2019-01-02 14:15:00	0	214.353	0	188.519	0	170.9	0	175.067	-6.123	889.583	49.013	0.339651
2019-01-02 14:30:00	0.323	99.41	0	143.905	0	170.367	0	175.233	-8.13	889.85	52.277	0.341072
2019-01-02 14:45:00	1.228	77.513	0.506	84.356	0.537	109.133	0.39	174.933	-9.595	890.158	58.251	0.341072
2019-01-02 15:00:00	1.523	102.84	1.31	87.356	1.206	94	1.392	157.533	-10.095	890.683	63.413	0.336809
2019-01-02 15:15:00	1.31	87.333	0.912	81.578	0.943	92.533	1.512	101.1	-10.166	889.975	66.912	0.339651
2019-01-02 15:30:00	1.353	93	1.294	92.782	1.414	101.833	1.649	106.867	-10.333	889.767	68.523	0.335387
2019-01-02 15:45:00	1.45	91.56	1.113	98.314	1.279	111.7	1.606	108.833	-10.766	889.85	70.037	0.341072
2019-01-02 16:00:00	1.936	68.117	1.619	69.326	1.08	83	1.188	106.733	-10.816	889.583	70.112	0.341072
2019-01-02 16:15:00	2.45	58.832	2.194	53.463	2.003	59.6	1.45	78.7	-11.395	890.142	70.4	0.341072
2019-01-02 16:30:00	2.348	58.482	2.195	60.227	2.085	66	1.479	71.967	-12.103	889.833	71.787	0.343914
2019-01-02 16:45:00	2.158	65.567	1.995	62.922	2.26	74.433	2.106	71.867	-12.67	889.817	73.269	0.296307
2019-01-02 17:00:00	1.85	82.067	1.767	73.503	2.084	80	1.972	72.033	-13.036	889.683	76.288	0.341072
2019-01-02 17:15:00	1.196	83.1	0.944	85.815	1.164	93.567	1.41	73	-12.886	889.792	78.432	0.341072
2019-01-02 17:30:00	1.309	105.63	1.381	102.493	1.681	118.867	1.835	119.233	-13.447	889.967	79.509	0.341072
2019-01-02 17:45:00	1.025	133.013	1.322	128.551	1.676	146.5	2.149	137.933	-13.635	890.012	82.731	0.342493
2019-01-02 18:00:00	1.446	136.733	1.594	142.572	2.071	149.5	1.991	138.067	-13.756	889.692	84.395	0.345335
2019-01-02 18:15:00	1.36	141.833	1.83	142.582	2.356	154	2.379	139.333	-14.016	889.733	85.781	0.355283
2019-01-02 18:30:00	0.087	142.8	1.42	157.578	2.238	155.1	2.304	148.967	-14.016	889.579	85.355	0.35102
2019-01-02 18:45:00	2.004	183.467	1.599	153.229	1.646	155.067	1.068	149	-14.083	889.408	84.928	0.341072
2019-01-02 19:00:00	2.991	196.973	2.028	166.894	1.385	161.667	0	148.867	-14.828	889.75	83.349	0.339651
2019-01-02 19:15:00	3.133	182.867	2.143	155.682	1.769	154.533	1.452	149	-13.672	890.412	85.696	0.345335
2019-01-02 19:30:00	3.014	186.2	1.855	151.464	1.466	143.8	1.437	135	-12.953	890.121	84.224	0.341072
2019-01-02 19:45:00	2.096	183.467	1.406	142.04	1.384	135.867	1.517	134.8	-12.686	890.062	84.288	0.341072
2019-01-02 20:00:00	1.858	182.233	1.762	138.513	1.745	125.367	1.757	128.567	-12.686	889.867	82.816	0.341072
2019-01-02 20:15:00	1.472	185.44	1.139	124.251	1.169	116	1.371	121	-13.428	890	82.571	0.341072
2019-01-02 20:30:00	2.163	179.647	1.346	123.272	1.361	116	1.57	121	-13.449	889.858	83.883	0.356704
2019-01-02 20:45:00	2.409	179.2	1.689	123.241	1.774	116	1.885	120	-13.003	889.654	84.288	0.342493
2019-01-02 21:00:00	2.325	171.267	2.041	115.95	2.343	110	2.402	120	-13.136	889.933	83.243	0.342493
2019-01-02 21:15:00	2.301	170.1	2.03	129.024	1.941	124.633	1.975	119.6	-13.922	890.396	82.261	0.343914
2019-01-02 21:30:00	2.209	173.9	1.858	143.758	1.975	126.933	2.224	125.067	-13.983	889.767	83.221	0.345335
2019-01-02 21:45:00	1.988	184.833	0.544	137.429	1.704	134.067	1.838	125	-14.099	890.125	84.416	0.341072
2019-01-02 22:00:00	2.657	196.933	1.4	140.836	1.481	133.933	1.801	127	-13.983	890.062	85.717	0.341072
2019-01-02 22:15:00	2.147	209.107	0	142.482	1.236	139.533	1.385	127.1	-13.605	890.121	85.931	0.341072
2019-01-02 22:30:00	1.753	218.567	0	142.635	0	140.033	0.457	127	-13.933	889.712	84.971	0.341072
2019-01-02 22:45:00	2.37	212.927	0.14	149.417	0	140	0.309	127.033	-13.868	889.758	85.376	0.342493
2019-01-02 23:00:00	2.194	214.9	0	149.492	0	139.7	0	127	-13.983	889.912	85.013	0.343914
2019-01-02 23:15:00	1.646	219.827	0	149.546	0	140	0	127.1	-13.728	889.767	85.44	0.341072
2019-01-02 23:30:00	0.402	220.9	0.106	72.928	0.899	92.167	0.087	125.467	-13.916	890.129	84.331	0.341072
2019-01-02 23:45:00	0	231.473	0	59.104	0.445	65.233	0	125.1	-14.845	890.279	83.072	0.346757
2019-01-03 00:00:00	0	221.9	0.146	59.117	0.329	65.133	0.208	125	-15.274	889.567	83.84	0.358126
2019-01-03 00:15:00	0.948	197.367	0	59.502	0	65.767	0.245	125	-15.641	889.696	85.291	0.341072
2019-01-03 00:30:00	0.894	192.567	0	59.927	0.667	75	1.455	106	-15.624	889.688	86.635	0.345335
2019-01-03 00:45:00	1.423	169.213	0.884	103.148	1.403	114	2.357	106.2	-14.87	889.738	88.427	0.360968
2019-01-03 01:00:00	2.027	167.647	1.822	128.689	2.268	118.7	2.85	107.2	-14.662	889.888	88.149	0.346757
2019-01-03 01:15:00	2.77	181.793	2.267	150.367	2.374	145.267	3.043	141	-14.883	889.625	86.144	0.358126
2019-01-03 01:30:00	3.277	195.04	2.532	165.038	2.332	158.6	2.083	139.633	-14.828	890.375	85.781	0.346757
2019-01-03 01:45:00	3.115	195	2.767	171.142	1.952	149.667	1.941	124	-14.924	890.083	86.229	0.345335
2019-01-03 02:00:00	2.404	200.787	1.908	164.865	1.471	135	1.726	116	-14.808	889.667	86.4	0.343914
2019-01-03 02:15:00	2.299	209.087	1.229	163.916	0.974	145	1.368	115.867	-14.704	889.771	85.589	0.346757
2019-01-03 02:30:00	2.283	218.613	1.323	195.421	0.11	145.1	0.759	115.833	-14.766	890.212	85.739	0.345335
2019-01-03 02:45:00	1.047	215.8	0	195.522	0	145.167	1.005	116	-14.166	890.138	86.229	0.353862
2019-01-03 03:00:00	0.947	221.44	0	195.57	0	145.067	0	116	-14.62	889.767	85.141	0.346757
2019-01-03 03:15:00	0.212	217.4	0	195.46	0.456	119.033	2.22	95.667	-15.108	889.692	85.376	0.365231
2019-01-03 03:30:00	1.304	223.133	0	195.475	0.47	96	2.2	83	-15.241	890.012	85.035	0.372337
2019-01-03 03:45:00	1.004	229.3	0	195.426	1.573	96	2.14	83	-15.374	889.696	85.397	0.358126
2019-01-03 04:00:00	0	231.427	0	104.256	1.851	93.133	2.396	83	-14.999	889.708	85.483	0.28849
2019-01-03 04:15:00	0	231	0.24	104.241	2.213	94.9	3.066	89.067	-15.291	889.967	85.269	0.197537
2019-01-03 04:30:00	0	231.3	0.027	104.257	1.22	100.033	2.538	101.533	-15.341	890.188	85.461	0.235198
2019-01-03 04:45:00	0.133	231.033	0.03	104.21	1.032	109.033	1.901	100.933	-15.274	889.967	85.419	0.370916
2019-01-03 05:00:00	0	226.467	0	106.347	0.702	138.3	1.861	121.6	-15.058	890.121	85.568	0.296306
2019-01-03 05:15:00	0.896	225.2	0.671	159.929	1.754	137.933	2.786	122.7	-15.241	889.95	85.952	0.172668
2019-01-03 05:30:00	1.896	235.933	1.199	199.48	1.357	180.733	1.317	130.233	-15.124	890.1	85.589	0.314781
2019-01-03 05:45:00	1.875	243.933	1.257	215.439	0.864	179.533	1.191	136.867	-15.274	889.733	85.589	0.368074
2019-01-03 06:00:00	1.927	243	0.213	220.493	0	182	0.568	136.867	-15.824	889.95	84.992	0.349599
2019-01-03 06:15:00	2.871	238.127	1.303	231.215	0.504	186.733	0	137.033	-15.788	889.954	84.608	0.349599
2019-01-03 06:30:00	2.95	239.2	1.121	245.54	0	211.967	0	137	-16.681	889.721	84.245	0.348178
2019-01-03 06:45:00	2.279	245.327	0.868	248.484	0	212	0	137.033	-15.955	889.988	84.907	0.356704
2019-01-03 07:00:00	2.469	242.367	1.35	282.269	0.546	244.4	0	82.175	-16.424	890.412	83.712	0.359547
2019-01-03 07:15:00	2.867	245.133	1.427	285.439	0.38	280.067	0	82.342	-15.874	890.05	84.619	0.35102
2019-01-03 07:30:00	2.512	248.273	1.368	286.222	0.493	280	0	82.35	-16.467	889.975	83.552	0.345335
2019-01-03 07:45:00	2.31	236.753	0	288.926	0	280	0	82.25	-16.446	890.029	83.627	0.349599
2019-01-03 08:00:00	2.358	229.04	0	288.904	0	280	0	82.283	-16.254	889.688	83.392	0.35102
2019-01-03 08:15:00	2.26	213.233	0	288.656	0	278.8	0.144	82.717	-15.608	889.8	84.267	0.355283
2019-01-03 08:30:00	1.387	199.967	0.073	180.513	0.207	179	0.56	83	-15.241	890.338	84.331	0.378021
2019-01-03 08:45:00	2.105	220.32	0	180.463	0	179	0.245	82.867	-15.969	890.25	83.371	0.352441
2019-01-03 09:00:00	2.773	220.207	0	180.425	0.027	179.033	1.424	169.2	-15.934	889.792	83.221	0.348178
2019-01-03 09:15:00	2.779	209.227	0.777	212.474	1.389	189.333	2.726	158.667	-15.955	890.388	83.008	0.369495
2019-01-03 09:30:00	3.292	211.9	1.574	193.02	2.368	173.667	2.822	155.7	-14.974	889.792	83.968	0.305544
2019-01-03 09:45:00	2.811	210.38	1.126	191.216	2.263	171.7	1.868	147.2	-14.887	889.975	82.645	0.208907
2019-01-03 10:00:00	2.084	210.14	2.215	169.518	2.336	143.467	2.289	120.367	-15.534	889.917	80.128	0.202511
2019-01-03 10:15:00	0.523	243.633	0	116.639	0.253	113.033	0.843	85.367	-17.398	889.825	74.624	0.129323
2019-01-03 10:30:00	0	309.133	2.115	39.122	1.799	56.679	1.696	71.8	-15.008	889.892	80.757	0.135008
2019-01-03 10:45:00	0.95	39.733	2.567	35.111	2.311	54.167	2.783	65.533	-14.066	889.65	80.192	0.270015
2019-01-03 11:00:00	0.393	20.279	2.117	33.85	2.24	53.833	2.709	69.933	-13.945	889.558	76.672	0.53932
2019-01-03 11:15:00	0.623	21.324	2.055	43.729	2.285	68.3	2.847	73.133	-13.981	889.658	75.2	0.839179
2019-01-03 11:30:00	0.717	75	2.168	82.068	2.712	103.567	3.251	101	-13.186	889.575	73.739	0.769544
2019-01-03 11:45:00	1.533	102.3	1.724	100.097	2.316	103.1	2.324	95.533	-12.97	890.1	70.112	0.434867
2019-01-03 12:00:00	1.313	105.033	1.554	99.722	2.009	101.667	2.496	93	-13.103	889.5	69.333	0.149219
2019-01-03 12:15:00	1.797	88.073	1.814	91.4	1.869	99.033	2.111	92	-12.266	889.808	68.331	0.254383
2019-01-03 12:30:00	2.19	85.827	2.278	83.678	2.342	90.167	2.311	84.733	-12.016	889.983	67.979	0.382285
2019-01-03 12:45:00	2.796	87.7	2.757	87.724	2.664	98.1	2.586	97.6	-12.266	889.775	70.091	0.368074
2019-01-03 13:00:00	2.592	69.315	2.499	65.448	2.468	74.967	2.245	72.567	-11.932	889.783	68.939	0.379443
2019-01-03 13:15:00	2.033	80.967	2.107	74.235	2.108	81.4	2.102	72.467	-11.545	890.133	68.789	0.370916
2019-01-03 13:30:00	1.54	85.493	1.436	78.144	1.67	85.6	1.874	83.9	-11.582	889.675	68.885	0.343914
2019-01-03 13:45:00	1.561	78.933	1.602	72.225	1.814	75.8	2.029	67.6	-11.545	890.042	67.296	0.341072
2019-01-03 14:00:00	2.259	63.728	2.176	60.74	2.226	69	2.304	70.5	-11.345	890.058	68.203	0.341072
2019-01-03 14:15:00	1.87	69.133	1.681	66.346	1.743	80.3	1.643	72.867	-11.495	889.608	69.312	0.341072
2019-01-03 14:30:00	1.817	88.333	1.862	84.202	1.967	90.533	1.889	76	-11.361	890.025	70.443	0.341072
2019-01-03 14:45:00	1.571	90.687	1.493	91.398	1.602	93.9	1.596	90	-11.64	889.525	71.787	0.341072
2019-01-03 15:00:00	1.349	100.733	1.206	95.752	1.371	97.2	1.384	90	-11.736	890.158	71.221	0.341072
2019-01-03 15:15:00	0.812	103.407	0.96	94.935	0.92	100.067	0.826	89.9	-11.661	889.567	70.037	0.335387
2019-01-03 15:30:00	1.233	73.5	1.166	76.582	1.06	83.367	0.906	89	-11.411	890.183	69.291	0.331124
2019-01-03 15:45:00	0.513	71.428	0.402	70.945	0.336	79.933	0.423	89	-11.445	889.625	68.939	0.328282
2019-01-03 16:00:00	0.44	80.567	0.186	67.251	0.31	85.833	0.366	89	-11.428	889.85	68.437	0.332545
2019-01-03 16:15:00	0.226	83.433	0.143	72.237	0.057	102	0.312	89	-11.445	889.642	69.536	0.333966
2019-01-03 16:30:00	0	93.247	0	72.244	0	102	0	89	-11.711	889.642	71.2	0.339651
2019-01-03 16:45:00	0	93.207	0	72.285	0	102	0	88.9	-11.836	890.142	71.264	0.341072
2019-01-03 17:00:00	0	93.24	0	72.298	0	102	0	89.033	-11.766	889.967	71.531	0.341072
2019-01-03 17:15:00	0	93.127	0	72.205	0	102	0.057	89	-12.12	889.9	73.163	0.341072
2019-01-03 17:30:00	0	117.1	0	89.236	0	116.067	0	88.833	-12.486	889.75	75.232	0.341072
2019-01-03 17:45:00	1.031	148.507	0.827	102.885	1.043	140.4	1.35	89	-12.593	890.225	77.141	0.341072
2019-01-03 18:00:00	0	149.2	0.13	142.392	0.26	158.4	0.521	89.1	-12.536	889.95	79.488	0.341072
2019-01-03 18:15:00	0.821	148.6	1.27	141.929	1.338	158.267	1.259	89.9	-12.686	889.829	82.112	0.341072
2019-01-03 18:30:00	0	147.7	0.266	141.55	0.313	158.233	0	89	-12.67	889.708	83.584	0.341072
2019-01-03 18:45:00	0	148.2	0.319	141.52	0	158.233	0	89.133	-12.87	889.725	84.523	0.341072
2019-01-03 19:00:00	0	148.2	0	141.298	0	158.1	0	88.833	-13.036	889.825	83.968	0.341072
2019-01-03 19:15:00	0	148.76	0	141.394	0.738	139.967	0.473	89	-14.212	890.358	83.157	0.341072
2019-01-03 19:30:00	0	147.627	0	82.239	0.096	86	0.53	89	-14.52	889.854	83.968	0.341072
2019-01-03 19:45:00	0	148.353	0	82.332	0.385	86.133	0	89	-14.874	889.838	83.925	0.341072
2019-01-03 20:00:00	0.714	147.82	0	82.27	0.721	86.1	0.476	89.2	-14.495	890.092	85.803	0.341072
2019-01-03 20:15:00	0	147.587	0	82.26	0.239	86	1.005	88.867	-14.599	890.042	84.693	0.341072
2019-01-03 20:30:00	0.303	146.167	0.922	82.262	0.629	91.667	1.194	89	-14.787	890.021	84.437	0.341072
2019-01-03 20:45:00	0	140.4	0.916	104.595	1.202	124	0.538	89	-15.491	890.196	83.008	0.341072
2019-01-03 21:00:00	1.076	154.24	1.435	134.81	1.17	135	1.02	89.033	-14.878	889.704	84.117	0.339651
2019-01-03 21:15:00	1.395	159.033	0.056	142.538	0	135.033	0.091	89	-15.008	890.112	84.075	0.341072
2019-01-03 21:30:00	2.1	168.52	0.886	142.476	0.493	134.9	0.978	89	-14.704	890.05	84.245	0.341072
2019-01-03 21:45:00	1.855	168.107	0.13	142.435	0	131.3	0.124	89	-14.724	890.062	85.696	0.341072
2019-01-03 22:00:00	1.284	175.093	0.26	142.491	0.324	147.033	0.893	89	-14.999	889.879	85.163	0.341072
2019-01-03 22:15:00	0	161.467	0.193	140.566	0.362	149	0.473	89.1	-14.92	889.988	84.288	0.341072
2019-01-03 22:30:00	0.253	154.9	0.26	140.405	0	149	0.42	89	-15.491	890.029	83.115	0.341072
2019-01-03 22:45:00	0.712	164.467	0	140.492	0.14	149	1.175	89	-14.804	889.808	85.056	0.343914
2019-01-03 23:00:00	1.051	162	0	140.495	0.76	144.933	1.211	89	-14.683	890.388	85.035	0.341072
2019-01-03 23:15:00	1.056	158.987	0.51	120.176	1.27	114.4	1.491	89.033	-14.599	890.021	85.099	0.345335
2019-01-03 23:30:00	0.621	166.933	1.234	116.996	1.516	111.8	1.602	88.867	-15.124	889.783	83.584	0.342493
2019-01-03 23:45:00	0.594	168.4	1.139	115.07	1.728	111.067	1.473	97	-15.091	889.958	84.181	0.343914
2019-01-04 00:00:00	1.099	169.56	1.404	111.524	1.556	111.067	1.659	96.4	-14.641	889.712	86.229	0.341072
2019-01-04 00:15:00	1.408	167.607	1.676	117.408	1.976	113.967	2	96.967	-14.516	889.683	86.656	0.349599
2019-01-04 00:30:00	1.688	161.913	1.674	116.709	2.137	111.833	2.29	96.8	-14.558	889.471	87.339	0.345335
2019-01-04 00:45:00	2.126	175.32	1.91	130.509	2.077	124.2	2.439	101.933	-14.599	890.092	84.885	0.366652
2019-01-04 01:00:00	1.952	173.013	2.134	134.275	2.412	128	2.824	115.767	-14.766	889.792	83.819	0.365231
2019-01-04 01:15:00	2.045	174.667	1.954	141.164	2.101	136.367	2.431	127	-14.787	889.658	83.072	0.360968
2019-01-04 01:30:00	2.101	187.2	2.09	149.113	2.026	140	2.422	124.933	-15.091	890.079	81.163	0.365231
2019-01-04 01:45:00	1.716	176.72	1.972	148.496	2.094	131	2.521	120.1	-14.808	889.583	81.12	0.342493
2019-01-04 02:00:00	1.813	196.033	1.517	148.554	1.997	130	2.458	120	-15.358	889.975	78.763	0.362389
2019-01-04 02:15:00	1.07	203.4	0.9	148.508	1.689	123.033	2.141	119.933	-15.274	889.875	79.072	0.355283
2019-01-04 02:30:00	1.069	203.4	0.07	135.481	1.788	117	1.938	118	-15.274	889.85	78.933	0.365231
2019-01-04 02:45:00	0.333	196.733	0.969	130.529	1.984	114.067	2.546	107.933	-15.108	890.05	78.603	0.366652
2019-01-04 03:00:00	0.183	195.333	0.579	130.469	1.734	114.133	2.489	106	-15.391	889.825	78.112	0.348178
2019-01-04 03:15:00	0.33	174	1.356	117.585	1.738	104	2.607	104.167	-15.374	889.758	78.549	0.355283
2019-01-04 03:30:00	0.067	139.413	1.505	81.559	1.827	93.533	2.207	97.267	-15.024	890.067	78.603	0.306965
2019-01-04 03:45:00	0.466	129.54	1.494	83.887	2.529	92.8	3.333	84.533	-15.558	890.117	79.936	0.35102
2019-01-04 04:00:00	0.947	137.747	2.542	87.766	1.886	97.5	2.617	90.233	-16.066	889.85	80.203	2.30295
2019-01-04 04:15:00	0.78	139.4	1.68	92.809	1.603	96.267	2.167	97.133	-16.531	890.462	82.88	3.2011
2019-01-04 04:30:00	0.24	150.613	2.253	96.739	1.991	102.633	2.533	97.533	-16.296	890.079	84.395	4.19021
2019-01-04 04:45:00	0.863	141.7	3.27	104.395	3.352	106.5	3.34	98.433	-16.36	890.021	85.781	5.28519
2019-01-04 05:00:00	1.089	141.96	3.437	104.67	3.803	107.8	4.097	103.167	-15.981	889.654	85.931	4.27903
2019-01-04 05:15:00	0.804	153.693	2.396	103.293	2.308	103.2	3.098	102.4	-16.382	890.212	85.589	2.60778
2019-01-04 05:30:00	1.603	187.793	1.32	138.605	2.29	107.3	2.881	102.6	-16.275	889.938	85.995	1.13549
2019-01-04 05:45:00	1.669	206.753	0.88	154.669	1.479	119.2	2.293	97.567	-16.981	889.692	83.861	0.520135
2019-01-04 06:00:00	0.14	209.427	0	152.463	0.392	103	1.122	88.7	-17.298	889.671	84.992	0.331834
2019-01-04 06:15:00	0	199.22	0	152.537	1.231	110.333	1.834	107	-16.446	890.462	87.04	0.156325
2019-01-04 06:30:00	0	209.147	0	149.508	1.263	110.867	1.452	92.7	-16.296	889.838	86.528	0.490291
2019-01-04 06:45:00	0	209.12	0.14	116.149	1.277	100.2	1.727	92.233	-16.339	889.467	85.717	1.37708
2019-01-04 07:00:00	0	209	0.893	104.508	1.654	95.3	2.012	94.1	-16.531	890.046	84.949	1.97253
2019-01-04 07:15:00	0	202.113	1.644	88.336	1.949	95.567	2.174	91.567	-16.33	890.325	84.672	2.67528
2019-01-04 07:30:00	0	127.5	1.834	89.755	2.077	95.133	2.365	94.433	-16.814	889.971	84.459	2.47206
2019-01-04 07:45:00	0	114	1.434	95.876	1.828	96.533	2.089	99.2	-16.931	889.283	84.843	1.2307
2019-01-04 08:00:00	0	114.053	0.877	97.992	1.514	96.733	1.803	96	-17.098	889.975	85.504	0.304833
2019-01-04 08:15:00	0	114	0.78	105.51	1.65	103.867	2.18	101.733	-16.831	890.321	86.549	0.220276
2019-01-04 08:30:00	0	116	0.326	110.247	1.484	103.667	2.194	94.9	-16.931	890.583	86.912	0.942211
2019-01-04 08:45:00	0	178.767	1.29	110.191	1.785	104.167	2.398	100.733	-16.881	890.05	87.125	0.94079
2019-01-04 09:00:00	0	178.033	1.087	106.428	1.383	102.467	2.162	102.167	-16.731	890.35	87.381	0.262199
2019-01-04 09:15:00	0	178.06	0.51	96.98	1.437	89.567	1.754	88.2	-16.605	889.671	87.083	0.36381
2019-01-04 09:30:00	0	166.067	1.613	76.037	2.059	91.233	2.545	93.867	-16.467	889.896	86.443	0.296306
2019-01-04 09:45:00	0	111.033	1.169	85.254	1.428	94.833	1.886	101.233	-16.424	889.879	86.656	0.356704
2019-01-04 10:00:00	0	111	0	80.242	0.916	94.067	2.146	107.4	-16.424	889.854	85.419	0.30057
2019-01-04 10:15:00	0	194.22	0	80.245	0	104	1.686	112.467	-15.896	890.254	84.971	0.330414
2019-01-04 10:30:00	0.133	215.933	0	80.277	0	104	1.697	107.1	-15.824	889.817	84.096	0.341072
2019-01-04 10:45:00	0	219.413	0	80.25	0	104	1.771	101.833	-14.937	889.996	83.776	0.366652
2019-01-04 11:00:00	0	164.833	0.183	74.597	0.658	88.9	2.016	88.2	-14.408	890.221	82.197	0.283516
2019-01-04 11:15:00	1.026	99.307	0.546	87.781	0.716	96.8	2.018	96.433	-14.558	889.508	80.555	1.27831
2019-01-04 11:30:00	2.509	108.467	2.002	103.038	2.075	107.9	3.318	104.033	-14.891	889.662	81.515	1.93416
2019-01-04 11:45:00	2.858	103.313	2.003	98.496	1.725	101.1	2.576	91.5	-14.504	889.792	82.88	1.55046
2019-01-04 12:00:00	2.585	100.467	1.937	95.938	1.511	100.267	2.223	97.4	-14.149	890.033	82.677	0.984135
2019-01-04 12:15:00	2.873	106.8	1.918	98.906	1.818	103.933	2.437	95.933	-14.216	889.921	82.261	1.36074
2019-01-04 12:30:00	2.699	78.733	1.738	75.232	1.718	81.8	2.059	84.833	-14.183	889.954	81.675	0.942922
2019-01-04 12:45:00	2.722	78.533	1.801	72.393	1.677	78.333	2.009	77.333	-14.149	889.667	81.184	0.237329
2019-01-04 13:00:00	2.789	84.433	1.773	79.122	1.681	84.733	2.191	79.5	-14.116	889.767	81.12	0.292043
2019-01-04 13:15:00	4.132	75.56	2.767	71.954	2.642	76.9	3.144	73.533	-14.183	889.967	81.835	0.753201
2019-01-04 13:30:00	3.75	78	2.518	73.613	2.74	79.533	3.062	76.967	-14.266	889.833	83.584	1.55472
2019-01-04 13:45:00	2.234	97.57	1.374	88.93	1.434	91.033	1.729	82.633	-13.71	889.858	83.307	1.32592
2019-01-04 14:00:00	3.565	84.837	2.315	82.165	2.329	87.5	2.461	81.967	-13.522	889.433	82.155	0.786597
2019-01-04 14:15:00	3.121	87.8	2.183	87.13	2.104	93.633	1.978	87.067	-13.086	889.779	81.525	1.93487
2019-01-04 14:30:00	3.115	78.263	2.365	72.686	2.559	78.667	2.453	76.733	-13.086	889.95	80.096	0.493133
2019-01-04 14:45:00	2.4	99.067	2.318	93.288	2.209	95.533	2.566	87.067	-13.003	889.45	78.955	0.23875
2019-01-04 15:00:00	2.671	68.785	2.731	68.998	2.707	74.267	2.842	71.967	-12.936	889.917	79.072	0.101611
2019-01-04 15:15:00	3.266	85.967	3.337	79.115	3.317	85.267	3.379	80.133	-12.82	889.742	78.048	0.105874
2019-01-04 15:30:00	2.766	78.298	2.935	72.845	2.933	76.933	3.007	71.833	-13.02	890.325	79.52	0.427761
2019-01-04 15:45:00	2.62	69.29	2.697	64.065	2.645	70.1	2.633	65.767	-12.62	889.658	77.653	0.251541
2019-01-04 16:00:00	1.2	67.617	1.056	65.517	1.296	65.2	1.575	57.3	-12.82	890.125	77.387	0.278542
2019-01-04 16:15:00	2.083	60.76	2.087	56.754	1.95	61.7	2.019	54.2	-12.82	889.717	75.467	0.339651
2019-01-04 16:30:00	3.466	65.597	3.262	65.02	3.233	77.667	3.44	76.167	-13.174	890	76.704	0.326861
2019-01-04 16:45:00	2.583	78.76	2.654	73.56	2.797	78.167	2.821	73.167	-13.357	889.892	79.691	0.206775
2019-01-04 17:00:00	2.398	79.237	2.338	77.813	2.367	80.633	2.254	77.767	-13.284	889.833	80.16	0.138561
2019-01-04 17:15:00	1.992	69.29	2.07	64.626	2.121	73.7	2.214	76.833	-13.597	889.908	81.152	0.31336
2019-01-04 17:30:00	2.36	72.967	2.576	69.089	2.65	72.767	2.634	72.233	-13.966	889.483	81.696	0.331835
2019-01-04 17:45:00	2.573	75.527	2.685	70.744	2.732	74.5	2.713	72.167	-14.154	890.175	83.157	0.272147
2019-01-04 18:00:00	2.342	96.913	2.616	85.941	2.513	97.067	2.734	89.967	-14.849	889.708	84.267	0.1883
2019-01-04 18:15:00	2.467	85.973	2.912	81.363	3.076	89.367	2.794	90	-15.054	890.154	85.269	0.30057
2019-01-04 18:30:00	2.873	87.767	3.022	85.177	2.936	93.5	3.187	89.1	-15.341	889.858	85.504	0.22596
2019-01-04 18:45:00	2.063	71.333	2.307	73.917	1.981	83.867	2.092	89	-15.791	890.025	86.635	0.294885
2019-01-04 19:00:00	0	66.027	0.12	71.245	0.093	79.867	1.276	89	-16.446	889.979	86.037	0.332545
2019-01-04 19:15:00	1.456	100.153	1.86	89.587	2.283	100	2.398	89	-16.467	889.692	86.571	0.333966
2019-01-04 19:30:00	0.233	123.2	1.331	99.043	1.315	110	1.784	118.067	-16.798	890.033	87.125	0.345335
2019-01-04 19:45:00	0	123	0	99.224	0	109.967	0.521	118	-16.714	889.421	86.251	0.331124
2019-01-04 20:00:00	0	123.007	0	97.283	0	98.833	1.235	104	-16.51	889.917	86.677	0.329703
2019-01-04 20:15:00	0	185.167	0	97.268	0	98.933	0	104.067	-16.914	890.188	86.421	0.332545
2019-01-04 20:30:00	0.505	235.127	0	97.211	0	99	0	104	-17.214	889.812	86.293	0.335387
2019-01-04 20:45:00	0	237.067	0	97.18	0	98.767	0	86.1	-16.898	889.475	86.635	0.345335
2019-01-04 21:00:00	0	237.767	0	97.253	0.04	65.233	1.3	69.633	-16.781	890.071	86.464	0.355283
2019-01-04 21:15:00	0	237	0.04	97.256	1.421	69.1	2.385	72.733	-16.798	889.817	85.739	0.322597
2019-01-04 21:30:00	0	237.033	0	97.29	0.326	72	1.357	72.033	-16.524	890.296	85.483	0.349599
2019-01-04 21:45:00	0.775	271	0.48	34.362	1.123	52.021	1.845	65.233	-16.831	890.292	85.653	0.120796
2019-01-04 22:00:00	0.805	305.867	0.08	25.19	1.229	54.05	2.113	72.767	-16.898	890.246	85.44	0.128613
2019-01-04 22:15:00	0	318.933	0.097	77.448	1.576	90.1	2.792	88.733	-16.964	890.017	84.992	0.206064
2019-01-04 22:30:00	0.213	289.467	0.034	87.316	0.502	76.921	2.07	82	-16.998	890.017	85.291	0.233776
2019-01-04 22:45:00	0	272.12	0	87.222	0	80.05	0.944	87.767	-16.572	890.125	85.205	0.368074
2019-01-04 23:00:00	0	237.733	0.113	94.608	0.978	119.867	2.33	110.633	-16.831	890.338	84.843	0.355283
2019-01-04 23:15:00	0.17	186.433	1.167	126.556	2.391	118.267	3.27	112.267	-16.798	890.15	85.184	0.262199
2019-01-04 23:30:00	0.776	210.9	0.367	162.966	1.255	139.567	2.465	120.6	-17.271	884.45	85.141	0.279963
2019-01-04 23:45:00	1.397	231.707	0	173.464	0.257	117	1.472	102	-17.521	884.075	84.843	0.353862
2019-01-05 00:00:00	1.681	255.247	1.061	236.651	0	117.083	0	102	-17.171	883.912	85.333	0.345335
2019-01-05 00:15:00	1.538	256.887	0.339	255.044	0	117.15	0.034	99.967	-17.522	883.471	84.651	0.345335
2019-01-05 00:30:00	1.207	278.267	0.027	308.98	0	336.7	0.571	68.467	-17.026	879.708	85.781	0.35102
2019-01-05 00:45:00	1.724	267.18	0.483	309.092	0.027	337.7	0.688	68	-17.521	884.238	84.416	0.333256
2019-01-05 01:00:00	0.296	267.3	0	313.675	0.442	67.958	1.978	84.8	-17.098	875.029	84.875	0.362389
2019-01-05 01:15:00	0	279.68	0	71.21	1.273	86.367	2.193	89.1	-17.175	865.333	84.331	0.324729
2019-01-05 01:30:00	0	267.333	0	71.27	0.559	86.925	1.801	89.367	-17.304	869.679	84.245	0.31336
2019-01-05 01:45:00	0	267.867	0	118.264	1.094	108.033	2.049	102.767	-17.209	865.671	84.288	0.140692
2019-01-05 02:00:00	0.183	254.167	0	118.214	0.066	97.033	1.66	94.567	-17.225	865.675	84.288	0.233777
2019-01-05 02:15:00	0	256.973	0	118.225	0.738	103.083	2.15	103.6	-17.373	867.529	84.651	0.268594
2019-01-05 02:30:00	0.356	252.933	0	113.237	0	97	0.45	94.2	-17.384	873.35	84.16	0.336098
2019-01-05 02:45:00	1.789	279.787	0.542	281.4	0	318.7	0	68.242	-16.84	887.633	84.864	0.35102
2019-01-05 03:00:00	0.902	296.933	0.17	292.749	0	318.633	0	68.079	-16.531	890.354	84.523	0.341072
2019-01-05 03:15:00	1.17	257.773	0	293.13	0	318.267	0.279	68.179	-16.505	889.908	84.416	0.341072
2019-01-05 03:30:00	1.646	262.16	0.133	292.873	0	318.5	0.622	92.05	-17.318	887.362	83.861	0.342493
2019-01-05 03:45:00	1.915	256.753	0.92	287.2	0	318.367	0	83.25	-17.354	884.396	83.541	0.341072
2019-01-05 04:00:00	2.013	260.88	0.912	287.11	0	318.433	0.735	95.017	-17.471	884.725	83.968	0.341072
2019-01-05 04:15:00	2.194	256.08	0.862	284.772	0	0	0	79.867	-17.6	887.888	83.563	0.343914
2019-01-05 04:30:00	2.196	255.387	1.182	284.86	0	0	0	79.733	-17.531	890.2	83.776	0.341072
2019-01-05 04:45:00	2.496	257.06	2.139	301.034	1.656	311.567	0.416	321.267	-17.735	886.162	83.317	0.342493
2019-01-05 05:00:00	2.315	260.787	2.522	289.049	1.636	284.9	0	356.8	-17.597	876.046	83.328	0.342493
2019-01-05 05:15:00	2.461	258.04	2.715	278.226	1.769	276.367	0.124	300.2	-17.502	886.546	83.968	0.343914
2019-01-05 05:30:00	2.507	264.547	3.094	285.171	2.317	277.2	1.371	253.2	-17.166	873.671	84.011	0.345335
2019-01-05 05:45:00	2.055	266.313	2.639	292.652	1.136	273.267	0	214.133	-17.209	880.317	83.264	0.35102
2019-01-05 06:00:00	1.68	250.753	1.318	283.848	0.196	255.717	0.595	147.433	-17.227	878.646	83.499	0.349599
2019-01-05 06:15:00	1.566	264.247	0	287.139	0	278.167	0.299	121.317	-17.108	880.442	83.328	0.346757
2019-01-05 06:30:00	1.982	254.213	0.296	292.913	0	278.2	0	121.108	-17.512	877.717	83.349	0.342493
2019-01-05 06:45:00	1.739	244.773	0	223.478	0	177.833	0.185	142.7	-17.447	876.008	83.541	0.348178
2019-01-05 07:00:00	1.925	242.86	0	223.484	0	144.833	0	131	-17.307	881.346	83.435	0.342493
2019-01-05 07:15:00	1.937	229.84	0	220.899	0.843	123.033	1.388	123.4	-17.202	871.704	83.285	0.349599
2019-01-05 07:30:00	3.085	231.127	0.4	216.464	0.717	142.033	2.14	126.267	-17.021	884.454	83.2	0.365231
2019-01-05 07:45:00	2.182	245.453	0.19	233.9	0.067	137.167	1.132	133.1	-17.064	890.033	83.563	0.352441
2019-01-05 08:00:00	2.382	244.667	0.103	235.981	0.564	52.333	1.273	102.4	-17.865	888.821	82.08	0.35102
2019-01-05 08:15:00	3.142	250.56	1.525	285.819	0.083	240.033	0.41	82.133	-17.914	890.196	82.848	0.352441
2019-01-05 08:30:00	1.986	262.827	1.174	336.314	1.669	24.029	1.706	78.867	-17.564	890.446	83.541	0.352441
2019-01-05 08:45:00	1.79	250.78	0.033	338.92	1.76	49.875	1.868	68	-17.914	890.158	83.093	0.353862
2019-01-05 09:00:00	3.502	223.06	0.46	237.152	0	45.1	1.488	68.1	-18.468	889.95	81.461	0.35102
2019-01-05 09:15:00	3.194	231.9	1.42	237.596	0	44.033	0	68	-17.481	890.021	83.477	0.349599
2019-01-05 09:30:00	2.906	249.587	1.717	266.715	1.43	310.133	0.161	68.054	-17.148	890.221	83.285	0.349599
2019-01-05 09:45:00	3.248	246.153	1.824	270.506	1.49	298	0.316	68.25	-17.481	889.908	82.245	0.35102
2019-01-05 10:00:00	2.903	246.78	2.079	261.906	1.256	289.667	0	67.825	-16.743	889.912	82.891	0.349599
2019-01-05 10:15:00	3.633	243.467	2.766	260.417	2.226	272.533	1.265	316.467	-16.714	890.25	81.376	0.349599
2019-01-05 10:30:00	3.384	248.613	2.413	266.023	2.073	274	1.801	292.933	-16.296	889.692	80.896	0.369495
2019-01-05 10:45:00	2.724	259.013	2.194	285.35	2.116	290.433	2.087	292.167	-15.191	889.892	81.579	0.368074
2019-01-05 11:00:00	3.527	251.847	2.586	280.755	2.306	290.1	1.879	291.733	-14.724	889.7	80.379	0.358126
2019-01-05 11:15:00	3.285	244.833	3.69	268.676	2.783	285.733	2.55	292.1	-14.233	890.292	78.139	0.32544
2019-01-05 11:30:00	3.037	256.827	4.352	265.057	3.802	281.767	3.326	292.367	-13.07	889.6	76.971	0.208907
2019-01-05 11:45:00	2.926	284.16	3.746	284.304	3.982	295	3.549	292.8	-13.67	889.983	75.035	0.135008
2019-01-05 12:00:00	2.242	291.267	2.699	289.443	3.142	297.1	3.089	292.067	-14.116	889.758	75.28	0.216012
2019-01-05 12:15:00	3.29	296.173	3.557	292.692	3.727	298.533	3.672	292.4	-14.199	890.025	74.928	0.114401
2019-01-05 12:30:00	4.48	294.6	4.624	289.519	4.705	293.033	4.491	292.633	-14.033	889.875	75.035	0.881103
2019-01-05 12:45:00	4.705	305.92	4.959	298.504	5.011	303.6	5.122	301.567	-14.078	889.958	74.085	3.221
2019-01-05 13:00:00	4.531	303.267	4.658	298.327	4.809	302.267	5.09	298.6	-13.883	889.583	73.792	3.50452
2019-01-05 13:15:00	4.365	303.32	4.554	297.33	4.448	302.5	4.572	297.833	-13.728	890.042	73.36	2.28803
2019-01-05 13:30:00	4.278	298.853	4.481	294.222	4.522	300.067	4.663	296.833	-13.524	889.85	73.413	1.56893
2019-01-05 13:45:00	4.358	298.773	4.622	294.331	4.59	298.3	4.609	293.067	-13.122	890.192	72.965	2.46496
2019-01-05 14:00:00	4.315	306.96	4.568	299.547	4.586	304.3	4.686	299.067	-12.949	890.125	73.195	2.7371
2019-01-05 14:15:00	4.057	302.667	4.262	299.644	4.255	304.567	4.314	303.867	-13.12	890.1	72.656	2.62412
2019-01-05 14:30:00	3.541	313.067	3.71	306.943	3.767	310.2	3.814	307.167	-12.586	889.658	71.909	1.90148
2019-01-05 14:45:00	2.949	294.533	3.075	287.886	3.172	289.7	3.349	283.5	-12.62	889.708	71.248	0.68996
2019-01-05 15:00:00	3.186	294.733	3.472	290.775	3.497	292.567	3.568	289.667	-12.553	889.65	70.763	1.44103
2019-01-05 15:15:00	3.535	309.227	3.79	302.304	3.886	307.6	3.907	306.467	-11.974	890.117	69.957	1.63857
2019-01-05 15:30:00	3.193	306.467	3.361	299.836	3.522	306.2	3.606	303.933	-11.786	889.825	70.069	2.07628
2019-01-05 15:45:00	3.697	324.04	3.875	315.12	3.94	317.1	4.01	314.367	-12.016	889.692	70.907	3.06681
2019-01-05 16:00:00	3.194	301.867	3.397	297.593	3.495	301.033	3.794	298.1	-12.436	889.633	72.267	1.77784
2019-01-05 16:15:00	2.822	291.573	2.949	288.147	3.185	290.967	3.371	291.5	-11.911	889.875	72.363	1.24918
2019-01-05 16:30:00	2.56	285.6	2.949	283.46	2.999	287.533	3.283	288.233	-12.436	889.942	73.627	0.532925
2019-01-05 16:45:00	1.413	270.413	1.504	261.087	1.628	263.467	1.768	263.967	-11.62	889.608	72.395	0.25083
2019-01-05 17:00:00	1.689	295.72	2.152	293.223	2.689	303.3	3.263	303	-11.611	889.475	71.632	0.186169
2019-01-05 17:15:00	2.272	304.547	2.525	298.455	2.75	305.233	3.22	306.367	-12.036	889.742	73.605	0.761727
2019-01-05 17:30:00	2.095	280.067	2.625	284.083	2.983	289.3	3.251	292.633	-12.336	890.017	74.816	0.986267
2019-01-05 17:45:00	1.865	250.82	2.502	267.301	3.039	277.833	3.687	282.633	-12.157	889.692	75.536	1.31668
2019-01-05 18:00:00	2.237	236.433	2.502	247.693	2.897	263.867	3.151	267.2	-12.52	889.758	77.941	0.60185
2019-01-05 18:15:00	2.685	222.547	2.809	234.593	2.924	249.5	3.028	253.033	-12.195	889.517	78.283	0.657274
2019-01-05 18:30:00	2.956	220.153	2.611	224.439	2.568	237.867	2.699	244.533	-11.911	889.708	77.653	0.586218
2019-01-05 18:45:00	2.443	234.993	2.505	231.532	2.629	244.867	2.599	248.133	-11.595	889.692	75.968	0.530083
2019-01-05 19:00:00	3.076	232.733	3.256	246.222	3.169	255.333	3.171	258.133	-12.436	889.567	75.264	0.685697
2019-01-05 19:15:00	3.453	223.08	3.375	231.979	3.363	238.467	3.271	236.633	-12.195	889.65	76.363	1.62435
2019-01-05 19:30:00	3.658	224.62	3.527	231.428	3.534	237.367	3.404	234.633	-11.636	889.842	74.816	1.86026
2019-01-05 19:45:00	3.606	230.933	3.841	235.021	3.876	240.6	3.764	236.1	-11.495	889.325	75.445	3.15918
2019-01-05 20:00:00	2.88	251.56	3.237	258.022	3.266	264.3	3.375	264.517	-11.411	889.992	75.435	2.42445
2019-01-05 20:15:00	3.132	271.147	3.405	278.24	3.621	282.3	3.8	277.567	-10.576	889.775	72.443	2.6966
2019-01-05 20:30:00	2.345	272.587	3.267	280.842	3.43	289.9	3.736	290.667	-10.632	889.908	73.088	2.53601
2019-01-05 20:45:00	2.411	284.8	3.091	288.666	3.284	291.5	3.648	288.2	-10.466	890.05	75.701	1.93274
2019-01-05 21:00:00	3.559	304.4	4.509	308.317	4.635	313.1	4.546	309.2	-10.67	890.167	74.768	2.93464
2019-01-05 21:15:00	2.156	310.933	2.871	308.709	2.917	311.1	3.065	303.767	-11.566	890.217	75.947	3.62318
2019-01-05 21:30:00	2.1	305.213	3.275	302.939	3.215	298.3	3.093	292.933	-11.69	889.525	77.675	0.746095
2019-01-05 21:45:00	2.427	300.24	3.472	303.256	3.553	303.867	3.574	292.2	-12.12	889.658	78.219	0.594034
2019-01-05 22:00:00	1.921	308	3.453	311.907	3.392	315.267	3.192	312.367	-12.253	889.5	78.939	2.33705
2019-01-05 22:15:00	2.275	281.4	3.765	289.852	3.642	293.6	3.524	288.8	-12.67	890.033	80.987	2.98651
2019-01-05 22:30:00	3.275	263.073	3.926	273.269	3.893	274.033	3.905	268.867	-12.52	890.229	82.123	2.66605
2019-01-05 22:45:00	2.585	258.327	3.437	268.198	3.208	271.267	2.96	260.8	-12.786	889.954	82.24	2.16296
2019-01-05 23:00:00	2.095	245.233	2.087	261.152	2.036	264	1.979	254.233	-12.62	890.058	83.307	1.80768
2019-01-05 23:15:00	2.052	280.667	2.286	288.594	2.42	285.3	3.886	279.8	-12.703	889.988	84.64	2.17789
2019-01-05 23:30:00	0.76	212.867	0.84	255.629	1.704	276.667	2.356	285.733	-12.986	889.754	84.096	2.71721
2019-01-05 23:45:00	1.198	304.067	1.018	300.212	1.08	300.9	1.31	299.1	-13.036	889.75	84.853	2.35624
2019-01-06 00:00:00	1.233	272.96	1.009	282.376	0.733	298.267	2.126	295.667	-13.56	889.846	84.544	2.89556
2019-01-06 00:15:00	2.145	235.967	1.765	263.134	2.094	281.333	2.892	289.567	-14.066	889.912	84.757	7.52206
2019-01-06 00:30:00	3.056	230.787	3.308	244.691	3.904	270.067	4.564	277.033	-13.597	890.117	86.251	12.5962
2019-01-06 00:45:00	4.57	245.773	4.75	249.547	4.686	261.8	4.729	266.933	-13.207	889.829	82.731	12.3674
2019-01-06 01:00:00	4.583	247.967	4.805	256.854	5.202	274	5.779	279.2	-13.053	889.875	80.416	13.6081
2019-01-06 01:15:00	4.866	245.773	4.843	260.708	4.999	274.2	5.491	274.967	-13.312	889.917	76.512	11.9397
2019-01-06 01:30:00	5.098	244.967	5.08	263.165	5.391	277.933	6.09	274.267	-13.689	889.717	76.667	15.9707
2019-01-06 01:45:00	4.288	255.687	4.192	274.974	4.95	277.567	5.725	270.8	-13.24	889.742	78.773	19.9186
2019-01-06 02:00:00	3.428	253.613	3.297	273.653	4.04	278.6	4.636	271.9	-13.186	889.892	75.899	11.3975
2019-01-06 02:15:00	3.307	240.127	3.634	269.649	3.859	271.2	4.129	263.983	-13.878	889.867	76.117	7.44745
2019-01-06 02:30:00	4.2	232.2	4.115	247.016	4.184	259.933	4.667	257.083	-13.036	889.858	77.248	7.56825
2019-01-06 02:45:00	5.542	223.48	6.28	234.108	5.934	241.8	5.377	240.5	-14.42	889.692	73.6	15.8989
2019-01-06 03:00:00	6.392	225.367	6.867	233.033	6.965	240.7	6.75	237.233	-13.799	890.075	75.413	29.723
2019-01-06 03:15:00	5.939	225.92	7.528	235.563	7.647	243.733	7.395	240.467	-13.691	890.05	74.795	36.1266
2019-01-06 03:30:00	7.35	234.433	8.119	239.372	8.375	246.867	8.249	243.633	-12.77	890.008	74.965	35.3791
2019-01-06 03:45:00	6.791	220.533	8.291	233.396	8.507	243.633	8.128	239.5	-12.77	889.925	71.232	31.444
2019-01-06 04:00:00	6.719	218.8	7.929	229.82	8.098	243.067	7.72	243.267	-13.357	890.167	72.651	28.9726
2019-01-06 04:15:00	7.26	222.807	7.904	230.999	8.109	239.867	8.036	238.633	-13.428	889.642	73.771	29.4246
2019-01-06 04:30:00	7.006	216.267	7.164	223.066	7.158	234.467	6.949	236.533	-12.436	890.158	72.203	30.9892
2019-01-06 04:45:00	6.067	229.933	8.714	241.168	9.169	249.933	9.239	247.067	-12.503	890.05	71.029	32.0814
2019-01-06 05:00:00	5.326	241.027	8.219	247.51	8.976	254.367	9.08	252	-11.953	889.675	71.744	31.3395
2019-01-06 05:15:00	5.337	237.553	6.282	235.227	7.053	242.2	7.464	240.067	-12.016	889.65	73.323	30.948
2019-01-06 05:30:00	4.757	229	7.396	237.706	8.054	249.533	7.773	247.083	-12.37	890.325	70.709	32.8019
2019-01-06 05:45:00	6.004	228.2	7.246	231.152	7.983	241.233	7.894	240.033	-12.77	889.75	72.427	33.16
2019-01-06 06:00:00	6.2	230.1	7.806	236.128	8.004	243.7	7.711	240.767	-12.903	889.875	72.277	32.9788
2019-01-06 06:15:00	6.399	228.993	7.453	229.54	7.538	235.667	7.196	233.5	-12.161	889.55	71.787	31.7346
2019-01-06 06:30:00	6.675	226.607	7.406	226.59	7.454	235	7.17	234.7	-12.036	889.842	71.36	31.024
2019-01-06 06:45:00	5.982	225.42	7.113	228.522	8.03	238.233	7.803	239.233	-11.67	890.167	70.016	31.3786
2019-01-06 07:00:00	5.485	221.6	7.361	230.916	9.371	242	10.279	243.733	-12.011	889.467	70.869	33.236
2019-01-06 07:15:00	8.775	233.633	11.351	237.382	11.928	248.367	12.019	247.633	-12.653	890.075	72.747	34.6771
2019-01-06 07:30:00	8.657	231.527	10.335	233.238	10.974	239.933	11.034	235.8	-11.107	889.75	69.835	32.9262
2019-01-06 07:45:00	8.715	230.36	10.144	229.938	10.769	235.667	10.487	232	-11.54	890.075	68.032	32.7315
2019-01-06 08:00:00	7.05	227.4	9.553	231.795	10.224	239.567	10.23	236.567	-12.986	889.558	70.176	32.048
2019-01-06 08:15:00	6.774	224.107	8.444	223.248	8.657	229.633	8.468	227.367	-13.174	889.658	70.688	35.5163
2019-01-06 08:30:00	7.125	222.267	8.359	227.938	8.601	235.5	8.532	233.133	-13.203	890.325	70.464	35.5681
2019-01-06 08:45:00	6.025	215.68	7.781	223.171	7.891	230.433	7.77	227.4	-13.87	890.342	70.645	37.9499
2019-01-06 09:00:00	4.98	229.1	7.599	232.252	8.138	238.567	8.025	235.1	-13.999	889.333	71.893	47.3252
2019-01-06 09:15:00	5.639	234.18	7.844	236.626	8.245	244.6	8.13	243.1	-13.653	889.708	72.224	39.3668
2019-01-06 09:30:00	5.402	231.193	7.058	234.64	7.138	245	6.923	241.433	-13.353	889.55	71.307	27.3014
2019-01-06 09:45:00	5.423	233.153	6.223	236.977	6.345	244.567	6.238	241.267	-13.155	889.958	70.187	22.7701
2019-01-06 10:00:00	5.827	223.4	6.193	225.222	6.145	233.9	6.066	232.233	-12.686	889.933	68.331	20.7848
2019-01-06 10:15:00	5.445	216.06	6.212	221.81	5.905	230.633	5.522	229.667	-12.057	889.467	66.869	19.1498
2019-01-06 10:30:00	5.153	218.133	5.925	221.52	5.752	227.3	5.499	224.333	-11.145	889.775	65.739	21.2218
2019-01-06 10:45:00	4.596	216.327	5.796	220.133	6.064	226.633	5.86	224.367	-10.191	889.9	63.712	21.8577
2019-01-06 11:00:00	4.26	225.507	6.055	223.768	7.103	227.033	6.931	222.833	-9.537	889.858	63.019	24.6766
2019-01-06 11:15:00	5.5	231	6.781	228.011	7.26	233.933	7.153	232.267	-8.724	889.65	61.685	30.0683
2019-01-06 11:30:00	5.665	222.56	6.804	222.82	7.237	227.467	7.212	224.733	-7.809	890.075	59.872	31.1896
2019-01-06 11:45:00	5.58	236.9	6.246	234.089	6.627	245.433	6.564	245.8	-7.289	890.308	58.891	30.6332
2019-01-06 12:00:00	6.663	256.22	7.433	262.033	7.673	266.4	7.763	261.433	-5.997	890.2	56.16	19.4049
2019-01-06 12:15:00	7.199	257.9	7.906	263.03	8.137	268.467	8.247	262.9	-6.478	889.7	56.843	19.7559
2019-01-06 12:30:00	5.675	260.04	6.556	261.672	6.904	265.833	6.864	261.583	-5.592	889.867	55.131	25.12
2019-01-06 12:45:00	6.611	257.26	7.159	265.59	7.337	271.217	7.491	266.767	-5.644	889.858	54.491	29.421
2019-01-06 13:00:00	7.531	259.367	8.182	262.718	8.348	267.75	8.477	263.767	-6.216	889.908	57.083	39.3384
2019-01-06 13:15:00	8.921	266.167	9.572	267.878	9.632	273.933	9.657	270.667	-6.363	889.783	57.616	49.6558
2019-01-06 13:30:00	7.151	262.787	7.942	263.899	8.532	269.133	8.9	265.317	-6.037	889.692	57.397	54.7151
2019-01-06 13:45:00	7.27	263.86	7.99	267.13	8.309	269.333	8.462	265.017	-6.076	889.558	57.131	51.6824
2019-01-06 14:00:00	7.51	258.887	8.272	261.864	8.445	266.283	8.238	261.3	-5.628	889.642	55.872	41.4566
2019-01-06 14:15:00	7.018	259.947	7.932	263.42	8.351	268.9	8.211	263.4	-5.747	889.35	56.96	39.6368
2019-01-06 14:30:00	6.807	271.413	7.709	271.35	7.982	275.2	7.901	271.567	-6.478	890.142	59.269	38.5525
2019-01-06 14:45:00	6.803	273.687	7.621	273.726	7.99	278.5	8.203	272.55	-6.645	889.967	60.501	36.7882
2019-01-06 15:00:00	6.91	275.373	7.756	278.416	7.963	282.967	8.208	277.9	-6.495	889.775	59.605	35.9199
2019-01-06 15:15:00	6.39	276.567	6.681	276.309	6.84	279.7	6.919	273.7	-6.041	890.15	59.984	31.8021
2019-01-06 15:30:00	5.826	267.313	6.365	266.567	6.63	271.933	6.872	267.567	-6.076	889.8	60.181	29.3059
2019-01-06 15:45:00	7.189	261.827	7.762	267.201	7.963	272.967	7.888	269.267	-6.037	889.883	59.173	39.3768
2019-01-06 16:00:00	6.712	258.793	7.414	262.842	7.431	267.383	7.578	264.733	-5.997	889.767	58.843	44.0892
2019-01-06 16:15:00	6.624	258.2	7.36	261.602	7.591	265.8	7.769	259.633	-5.8	890.075	58.144	41.4161
2019-01-06 16:30:00	6.799	258.08	7.465	264.167	7.798	268.833	7.912	263.8	-6.416	890.125	59.691	40.1619
2019-01-06 16:45:00	5.829	259.313	6.427	263.809	6.754	266.9	6.86	259.817	-6.612	890.142	60.085	27.5245
2019-01-06 17:00:00	5.77	260.493	6.716	262.396	6.875	266.433	7.091	260.233	-6.512	889.792	60.155	23.5077
2019-01-06 17:15:00	4.8	270.98	5.786	272.5	5.994	275.467	6.123	269.533	-7.091	889.758	63.115	19.9797
2019-01-06 17:30:00	5.365	272	6.416	274.848	6.725	279.8	6.94	276.4	-7.384	889.958	64.379	24.0399
2019-01-06 17:45:00	5.91	273.513	6.968	275.639	7.328	279.267	7.613	275.533	-7.539	890.075	64.8	24.0882
2019-01-06 18:00:00	4.318	274.713	6.051	277.3	6.468	280.7	6.794	277.067	-7.913	889.775	65.413	19.9094
2019-01-06 18:15:00	3.715	268.173	4.956	269.769	5.214	274.167	5.437	270.467	-8.464	890.442	65.84	14.9169
2019-01-06 18:30:00	3.893	256.38	5.317	263.176	5.523	267.2	5.605	261.633	-8.991	890.45	67.269	11.3151
2019-01-06 18:45:00	4.443	248.587	5.406	257.698	5.63	263.2	5.773	258.883	-9.508	889.825	68.603	9.88611
2019-01-06 19:00:00	3.045	209.993	4.048	246.543	4.492	255.533	4.637	252.383	-10.599	889.533	69.696	13.8035
2019-01-06 19:15:00	4.364	227.087	4.616	242.854	5.097	258.5	5.11	258.25	-10.351	889.967	71.584	15.1251
2019-01-06 19:30:00	5.238	227.253	5.221	236.226	5.123	249.2	5.408	248.433	-11.466	889.675	72.416	14.2092
2019-01-06 19:45:00	4.811	238.493	5.626	244.168	5.646	251.2	5.451	249.467	-11.14	889.767	72.309	14.0223
2019-01-06 20:00:00	4.846	220.333	5.67	236.995	6.072	245.467	6.1	241.9	-12.47	889.858	71.669	17.4195
2019-01-06 20:15:00	5.184	228.7	6.132	239.482	6.347	246	6.276	242.433	-12.636	890.017	73.472	21.1308
2019-01-06 20:30:00	5.479	224.1	6.422	236.164	6.439	244.3	6.338	241.667	-12.52	890.117	73.355	22.3971
2019-01-06 20:45:00	4.955	221.9	6.31	235.017	6.584	242.733	6.46	239.633	-12.57	889.767	73.717	22.5669
2019-01-06 21:00:00	4.463	216.633	5.93	231.485	5.842	242.133	5.808	240.1	-12.436	890.008	73.003	18.2644
2019-01-06 21:15:00	5.968	214.633	6.348	219.651	6.069	227.467	5.648	226.133	-12.636	890.083	73.483	18.2779
2019-01-06 21:30:00	5.922	223.267	6.143	226.48	6.099	232.033	5.788	230.467	-12.586	889.908	72.64	18.1528
2019-01-06 21:45:00	6.578	219.533	6.492	223.154	6.351	228.533	6.023	225.067	-12.436	889.658	72.757	17.8679
2019-01-06 22:00:00	5.335	219.4	6.272	223.766	6.126	231.667	5.714	229.967	-12.47	889.683	72.021	14.7315
2019-01-06 22:15:00	5.771	217.067	5.82	224.979	5.419	235.767	4.961	234.833	-13.103	889.592	72.661	12.6474
2019-01-06 22:30:00	5.848	221.967	6.306	228.974	6.051	238.967	5.692	236.5	-13.103	890.058	73.483	14.1182
2019-01-06 22:45:00	6.236	222.227	6.391	224.652	6.088	232.633	5.736	232	-13.635	889.817	73.973	15.2523
2019-01-06 23:00:00	4.941	219.767	6.101	223.139	5.762	229.8	5.266	228.167	-13.17	889.617	74.165	13.6571
2019-01-06 23:15:00	5.925	212.947	6.414	218.158	5.834	222.533	5.336	221.1	-13.372	889.867	74.816	15.4889
2019-01-06 23:30:00	6.212	218.167	5.952	222.716	5.722	230.167	5.222	227.633	-13.203	889.958	74.208	14.114
2019-01-06 23:45:00	6.221	225.567	6.172	231.256	5.881	240.467	5.425	238.7	-13.136	889.892	73.888	12.9138
2019-01-07 00:00:00	5.969	216.933	6.3	220.439	5.943	227.833	5.493	226.433	-13.484	889.708	74.112	14.3726
2019-01-07 00:15:00	6.146	215.807	7.135	219.768	6.274	224.433	5.58	221.233	-13.76	889.758	74.891	14.3513
2019-01-07 00:30:00	6.063	215.3	6.876	213.991	6.526	219.7	6.105	219.133	-13.578	889.717	74.389	14.8594
2019-01-07 00:45:00	5.955	219.153	6.607	217.923	6.006	223.233	5.527	222	-13.503	889.933	73.387	13.6244
2019-01-07 01:00:00	6.245	219.407	6.54	216.687	5.913	223.167	5.084	222.667	-13.71	889.842	73.952	10.6571
2019-01-07 01:15:00	6.319	217.14	6.31	212.864	5.761	217.967	5.041	217.5	-13.428	889.775	73.28	10.117
2019-01-07 01:30:00	6.42	216.113	6.519	212.894	5.855	216.767	5.005	214.2	-13.372	890.017	72.757	10.4922
2019-01-07 01:45:00	6.64	217.233	6.343	216.783	5.994	220.367	5.449	218.3	-13.578	890.208	72.181	10.8582
2019-01-07 02:00:00	6.535	218.2	6.272	216.336	5.874	221.533	5.455	220.333	-14.066	890.075	72.96	12.0711
2019-01-07 02:15:00	6.802	217.167	6.915	213.386	6.328	217.7	5.718	215.767	-13.916	889.742	73.397	11.6576
2019-01-07 02:30:00	5.58	216.6	6.263	219.194	5.558	224.7	4.923	222.633	-14.049	889.833	73.131	9.97351
2019-01-07 02:45:00	5.946	220.4	6.018	221.59	5.319	226.067	4.503	223.533	-14.199	889.875	73.813	8.72078
2019-01-07 03:00:00	6.612	216.867	6.409	215.241	5.63	221.933	4.762	220.3	-14.133	889.692	73.888	8.88066
2019-01-07 03:15:00	6.534	216.433	5.755	211.611	5.254	214	4.8	213.367	-13.578	889.533	73.173	8.40387
2019-01-07 03:30:00	5.7	213.233	5.966	206.808	5.623	209.633	5.231	205.8	-14.149	890.3	72.789	8.14238
2019-01-07 03:45:00	5.859	211.633	6.731	204.997	6.054	209.567	5.386	203.7	-14.016	889.842	74.453	8.1573
2019-01-07 04:00:00	6.428	218.947	5.936	212.276	5.363	214.2	4.707	212.433	-14.454	889.9	73.664	8.50193
2019-01-07 04:15:00	6.518	220.393	6.2	216.513	5.51	223.133	4.79	224.067	-14.537	890.3	72.885	6.74328
2019-01-07 04:30:00	6.654	217.653	6.364	214.219	5.708	221.5	4.588	220.833	-14.341	890.017	72.757	7.71889
2019-01-07 04:45:00	6.326	219.553	6.394	215.14	5.619	221.533	4.602	218.933	-14.374	889.942	72.075	6.2473
2019-01-07 05:00:00	6.593	220.96	6.186	220.408	5.615	226.733	4.529	222.9	-14.849	890.008	72.661	4.694
2019-01-07 05:15:00	5.955	214.68	5.697	217.494	5.23	223.6	4.188	220.067	-14.87	889.95	72.149	5.97942
2019-01-07 05:30:00	6.767	214.133	6.884	213.85	6.092	219.7	5.427	217.033	-15.474	889.967	74.027	8.15304
2019-01-07 05:45:00	6.495	218.067	6.223	212.425	5.667	219.133	5.225	216.767	-15.291	889.6	73.067	7.19662
2019-01-07 06:00:00	6.427	216.367	6.055	210.466	5.344	215.933	4.846	216.933	-15.374	889.758	74.037	5.3996
2019-01-07 06:15:00	5.792	215.1	6.073	206.188	5.788	209.9	4.962	206.767	-15.391	889.775	73.909	5.17008
2019-01-07 06:30:00	6.379	217.433	5.171	211.849	4.555	213.233	4.139	208.533	-15.291	890.033	73.963	3.73758
2019-01-07 06:45:00	5.989	220.133	4.585	212.539	4.397	216.733	4.137	214	-14.683	890.225	72.832	2.69518
2019-01-07 07:00:00	5.856	224.167	6.154	222.069	5.236	231.167	4.372	229.533	-15.424	889.533	72.853	1.70678
2019-01-07 07:15:00	4.546	227.3	5.327	228.114	4.531	238.7	3.793	237.233	-15.658	889.9	73.333	1.45382
2019-01-07 07:30:00	4.642	229.473	5.311	228.557	4.182	238.733	3.394	235.433	-16.36	889.783	74.699	0.729041
2019-01-07 07:45:00	5.252	227.973	4.979	228.982	3.99	239.767	3.189	236.867	-16	889.958	74.699	0.247988
2019-01-07 08:00:00	6.352	222.933	5.022	222.64	4.433	227.267	3.762	226.9	-15.524	889.475	74.251	0.871865
2019-01-07 08:15:00	6.069	221.633	5.588	219.926	4.717	225.9	3.549	227.8	-15.608	889.767	72.853	1.75581
2019-01-07 08:30:00	6.382	220.5	5.441	214.284	4.667	215.933	3.689	216.1	-15.224	889.917	73.408	1.65846
2019-01-07 08:45:00	4.596	219.633	5.253	220.234	4.058	220.933	3.007	212.567	-15.914	889.958	70.496	1.22288
2019-01-07 09:00:00	3.66	227.387	5.438	216.46	4.547	215.333	3.687	212	-16.372	890.242	73.024	0.731884
2019-01-07 09:15:00	5.236	227.2	4.204	210.168	3.298	198.767	2.754	189.133	-16.764	890.058	74.837	0.216012
2019-01-07 09:30:00	5.23	223.867	3.186	195.27	1.728	181.433	1.351	155.3	-15.841	889.9	73.333	0.311228
2019-01-07 09:45:00	3.596	202.213	2.634	166.238	2.357	147.4	2.301	131.133	-13.191	889.683	74.848	0.341072
2019-01-07 10:00:00	3.404	205.993	2.084	154.131	2.154	130.833	2.256	109.9	-11.678	889.675	64.8	0.266462
2019-01-07 10:15:00	3.119	164.147	2.055	153.123	2.109	123.567	2.881	106.2	-13.482	889.625	60.629	0.272858
2019-01-07 10:30:00	3.781	193.167	3.394	165.303	2.308	153.467	2.123	123.633	-12.536	889.892	64.949	0.449789
2019-01-07 10:45:00	3.688	190.46	3.44	158.086	2.71	158.2	2.073	135.233	-10.853	890.008	63.648	1.61085
2019-01-07 11:00:00	3.319	179.633	3.659	157.283	3.14	157.1	3.158	143.467	-10.316	889.85	60.907	3.65658
2019-01-07 11:15:00	2.769	171.607	3.652	157.251	4.028	152.133	3.526	136.8	-9.954	889.35	59.307	5.94531
2019-01-07 11:30:00	3.163	156.073	3.869	149.73	3.889	150.467	4.041	142.7	-9.399	889.575	57.856	5.8103
2019-01-07 11:45:00	2.88	143.42	3.501	141.32	3.584	145.933	3.356	138.167	-8.33	889.975	55.381	4.15326
2019-01-07 12:00:00	2.808	138.55	2.714	131.003	2.564	135.8	2.584	130.133	-7.973	889.842	53.077	2.67457
2019-01-07 12:15:00	2.111	132	2.186	128.639	2.181	133.1	2.382	127.833	-7.516	889.6	51.392	1.91782
2019-01-07 12:30:00	2.895	120.543	2.982	117.651	3.066	126.367	3.108	123.9	-7.281	889.85	51.861	2.06704
2019-01-07 12:45:00	2.772	126.047	2.858	120.454	2.914	121.767	3.112	119.367	-7.416	889.617	51.744	1.81337
2019-01-07 13:00:00	3.399	111.71	3.354	104.106	3.478	110.733	3.554	104.933	-7.15	889.608	52.171	2.47277
2019-01-07 13:15:00	3.706	95.057	3.689	93.52	3.282	99.6	3.054	97.467	-7.032	889.858	54.037	3.06965
2019-01-07 13:30:00	3.174	97.077	2.839	95.369	2.842	98.433	3.112	97	-7.15	889.708	55.179	3.13644
2019-01-07 13:45:00	3.548	106.687	3.273	99.514	3.262	101.167	3.334	99.333	-7.376	890.008	56.971	3.84132
2019-01-07 14:00:00	3.045	106.657	2.613	100.586	2.583	104	2.771	98.333	-7.032	890.133	57.707	2.98935
2019-01-07 14:15:00	3.402	103.66	3.032	98.362	3.153	105.767	3.005	99.767	-7.012	889.942	60.597	3.09594
2019-01-07 14:30:00	3.796	83.26	3.864	75.388	3.889	80.833	3.924	76.433	-7.399	889.767	63.264	4.27619
2019-01-07 14:45:00	3.501	75.145	3.574	70.808	3.626	75.7	3.547	74.3	-7.662	889.742	66.912	4.99457
2019-01-07 15:00:00	4.11	87.167	3.983	82.39	3.721	86.7	3.713	83.833	-7.522	890.208	65.461	6.12366
2019-01-07 15:15:00	4.378	74.978	4.445	71.03	4.57	75.133	4.629	73.333	-7.583	889.767	67.488	5.82238
2019-01-07 15:30:00	4.035	70.598	4.094	64.488	4.132	70	4.199	68.3	-7.522	890.108	67.744	6.93371
2019-01-07 15:45:00	4.504	75.527	4.363	71.952	4.49	77.7	4.587	73.7	-8.07	889.592	69.504	7.91145
2019-01-07 16:00:00	4.228	83.547	3.96	78.762	3.71	86.967	3.787	85.533	-7.876	889.858	69.707	7.34513
2019-01-07 16:15:00	4.528	81.947	4.518	76.008	4.17	84.033	3.808	85.967	-8.127	889.7	71.008	7.80131
2019-01-07 16:30:00	4.105	87.617	3.951	89.034	3.62	93.433	3.305	95.433	-8.291	889.95	70.549	10.5647
2019-01-07 16:45:00	5.231	83.283	5.283	78.424	4.918	85.367	4.443	83.067	-8.09	890.167	67.552	12.8577
2019-01-07 17:00:00	3.988	85.667	3.418	87.96	3.126	97.533	3.245	94.167	-8.624	889.975	68.693	9.75963
2019-01-07 17:15:00	3.604	82.533	3.276	82.87	2.819	90.9	2.829	94.7	-8.758	889.825	69.76	7.04029
2019-01-07 17:30:00	3.234	83.96	2.948	88.744	2.365	99.133	2.885	100.733	-9.178	889.95	72.939	5.26743
2019-01-07 17:45:00	2.753	87.993	2.784	91.485	2.414	102.467	2.791	98.967	-9.828	890.233	72.843	4.85956
2019-01-07 18:00:00	2.963	86.033	2.923	88.627	2.463	98.667	2.452	101.3	-10.299	890	74.741	4.12484
2019-01-07 18:15:00	2.849	75.83	3.154	78.293	2.666	88.5	2.173	88.033	-10.76	890.008	77.067	3.32616
2019-01-07 18:30:00	2.874	79.023	3.2	76.693	2.719	86.933	2.17	84.5	-11.243	889.667	78.453	1.83113
2019-01-07 18:45:00	0.544	76.48	3.022	79.435	2.802	89.9	2.119	90.967	-11.711	889.7	73.909	0.530083
2019-01-07 19:00:00	0.253	63.575	2.331	69.796	2.953	80.467	2.432	81.967	-12.636	889.975	78.507	0.099479
2019-01-07 19:15:00	0	59.05	1.214	63.084	2.994	73	2.856	78.067	-13.12	889.442	81.035	0.284227
2019-01-07 19:30:00	0.124	71.99	0.916	76.231	2.19	88.433	1.73	90.5	-13.222	889.796	83.008	0.213881
2019-01-07 19:45:00	1.081	189.893	0	94.179	0.837	108.067	1.595	94.233	-13.303	890.15	83.179	0.515161
2019-01-07 20:00:00	1.063	137.02	1.656	90.232	1.664	96.3	1.881	83.267	-13.316	890.233	81.931	0.888919
2019-01-07 20:15:00	0	142.72	1.244	90.272	2.103	89.167	1.619	84.333	-13.691	889.983	81.813	1.11417
2019-01-07 20:30:00	0.036	142.6	0.466	97.277	1.906	90.033	2.191	84.967	-13.578	890.221	83.115	1.39484
2019-01-07 20:45:00	0	147.8	0.26	80.537	2.018	82.867	3.667	72.9	-14.166	889.621	84.608	3.3624
2019-01-07 21:00:00	0.133	166.667	1.043	88.623	2.792	88.533	2.937	88.5	-14.216	890.212	85.184	5.3392
2019-01-07 21:15:00	0.526	152.833	2.203	92.134	2.565	94.5	2.644	93.433	-14.116	890.025	85.504	5.45573
2019-01-07 21:30:00	1.433	195.193	0.777	140.815	1.34	110.133	2.286	88	-14.641	889.542	84.437	3.07746
2019-01-07 21:45:00	1.227	178	1.459	117.666	2.342	113.9	2.845	101.067	-14.099	890.158	84.821	1.58527
2019-01-07 22:00:00	0.792	185.6	0.643	118.885	1.39	105.7	1.787	90.267	-14.133	889.762	84.181	1.20654
2019-01-07 22:15:00	0	180.9	0.253	81.098	1.862	85.733	2.242	82.7	-14.033	889.562	84.416	0.530083
2019-01-07 22:30:00	0	178.733	0.193	79.456	1.27	94.567	1.65	100.1	-14.049	890.208	84.416	0.133586
2019-01-07 22:45:00	0	178.64	0.034	90.238	0.888	106.967	1.636	100.933	-14.516	889.862	85.12	0.214591
2019-01-07 23:00:00	0	176.787	1.411	117.713	2.303	114	2.801	101.3	-14.254	889.954	85.696	0.132876
2019-01-07 23:15:00	0	176.48	0	90.486	1.806	83.633	2.29	87.033	-14.833	889.888	85.035	0.071057
2019-01-07 23:30:00	0.309	218.967	0.043	86.24	1.109	69.8	2.112	85.7	-15.291	889.679	84.693	0.154193
2019-01-07 23:45:00	0.971	238.3	0	51.14	0.027	64.833	1.865	74.1	-15.691	889.646	83.627	0.184037
2019-01-08 00:00:00	1.284	238.133	0	41.124	0.403	79.5	2.613	72.067	-15.808	889.954	84.032	1.37424
2019-01-08 00:15:00	0.592	240	0	43.502	1.622	93.633	2.251	86.167	-15.591	889.75	84.437	2.29442
2019-01-08 00:30:00	1.873	216.76	0.027	96.908	0.87	113.633	1.733	91.7	-16.168	889.867	82.923	2.11109
2019-01-08 00:45:00	1.769	221.447	0	142.326	1.024	124.3	2.127	94	-17.414	890	79.029	1.1568
2019-01-08 01:00:00	0.166	167.253	1.854	85.57	2.077	90.5	2.064	91.1	-16.255	888.975	84.8	1.30957
2019-01-08 01:15:00	0.223	214.04	0.46	86.386	1.907	93.633	2.197	92.1	-16.467	889.908	84.309	1.20796
2019-01-08 01:30:00	0.263	214	0.514	86.455	2.197	92.3	2.48	94.1	-16.681	889.579	84.139	1.77357
2019-01-08 01:45:00	1.563	213.967	0.09	114.914	2.012	110.967	2.656	100.3	-16.931	889.875	84.651	3.05402
2019-01-08 02:00:00	1.621	206	0.146	151.058	1.244	121.333	2.049	97.5	-16.648	890.271	85.077	2.23189
2019-01-08 02:15:00	0.319	219.353	0	127.23	0.925	113.4	1.796	88.533	-17.148	890.121	83.968	1.89011
2019-01-08 02:30:00	1.2	211.56	0	148.643	1.24	121.167	3.452	108.433	-16.382	889.854	86.357	1.39555
2019-01-08 02:45:00	2.957	213.22	1.234	186.184	1.297	155.133	2.566	121.667	-16.446	889.433	86.144	0.747516
2019-01-08 03:00:00	2.482	223.533	0.207	188.436	0.436	159.8	2.156	111.233	-15.774	889.767	85.781	0.061819
2019-01-08 03:15:00	0.376	238.233	0	186.94	0.326	100.667	1.73	81.467	-15.641	889.808	84.843	0.110848
2019-01-08 03:30:00	0	238.367	0	173.463	0.043	80	2.01	78.1	-15.741	890.375	84.907	0.107296
2019-01-08 03:45:00	0.167	299.667	0.743	37.037	2.033	63.175	3.044	67.867	-15.391	889.683	85.632	0.461158
2019-01-08 04:00:00	0.456	312.8	0.1	42.841	1.624	63.575	2.402	72.767	-15.391	890.121	85.44	0.969923
2019-01-08 04:15:00	1.771	281.973	0.17	17.262	0.337	68.25	1.845	72.167	-16.002	889.8	83.968	0.16343
2019-01-08 04:30:00	2.364	249.9	0.31	302.468	0.896	49.125	1.424	80.5	-17.098	890.558	82.389	0.349599
2019-01-08 04:45:00	2.219	254.933	0	348.963	0.134	78.85	1.69	105.933	-17.031	890.108	84.096	0.345335
2019-01-08 05:00:00	2.007	257.133	0	348.745	0.127	99.658	2.462	105.867	-16.864	890	84.416	0.202511
2019-01-08 05:15:00	2.217	251.693	0	302.981	0	96.167	0.437	80.4	-17.131	889.375	84.352	0.109427
2019-01-08 05:30:00	1.84	271.56	0.03	304.604	0.697	61.958	2.258	75.433	-16.593	889.288	84.885	0.092374
2019-01-08 05:45:00	1.419	303.813	0.63	228.392	1.455	47.402	2.689	66.2	-15.9	890.133	85.493	0.429182
2019-01-08 06:00:00	1.284	287.293	0	4.981	1.581	70.396	3.132	75	-17.081	889.908	82.645	1.00545
2019-01-08 06:15:00	0.907	233.54	0	18.069	0.943	94.633	2.133	85.833	-18.185	889.75	81.92	0.304123
2019-01-08 06:30:00	2.825	213.247	1.149	187.458	1.57	171.8	2.171	137.467	-17.481	889.512	85.013	0.155614
2019-01-08 06:45:00	3.483	217.1	1.915	203.922	1.771	188.9	2.005	152.9	-17.198	889.925	85.163	0.110848
2019-01-08 07:00:00	3.232	234.967	1.587	210.61	1.121	201.733	1.182	158.333	-17.731	889.738	81.717	0.272858
2019-01-08 07:15:00	3.729	230.34	0.91	200.779	1.317	152.667	2.392	119.5	-18.202	889.804	82.165	0.245856
2019-01-08 07:30:00	3.279	221.107	1.293	193.722	1.197	168.1	1.68	134.3	-18.731	889.571	80.939	0.166983
2019-01-08 07:45:00	2.503	191.007	1.82	147.264	2.168	135.833	2.863	120.233	-17.448	889.825	84.373	0.592613
2019-01-08 08:00:00	2.438	158.647	2.78	121.789	3.166	118	3.451	110	-16.643	889.925	83.243	2.74989
2019-01-08 08:15:00	1.3	142.847	2.321	110.368	2.35	108.233	2.656	100.133	-16.543	889.9	83.584	1.86666
2019-01-08 08:30:00	1.882	162.4	2.866	117.764	2.989	111.8	3.337	104.767	-16.914	889.721	82.923	1.7146
2019-01-08 08:45:00	1.806	180.8	2.164	123.386	2.758	118.133	3.057	105.9	-16.731	889.946	83.435	2.19778
2019-01-08 09:00:00	1.758	198.8	1.657	148.699	2.648	118.133	3.403	102.9	-16.548	889.783	84.203	1.93985
2019-01-08 09:15:00	2.45	219.86	0.47	164.408	1.367	131.967	2.525	112.8	-16.522	889.942	83.051	0.247277
2019-01-08 09:30:00	2.902	222.967	0.073	168.664	0.153	145.833	1.132	101.133	-16.531	889.846	82.176	0.359547
2019-01-08 09:45:00	2.6	229.833	0	212.392	0	148	1.313	100	-15.391	889.571	81.557	0.355283
2019-01-08 10:00:00	1.964	229.073	0	212.477	0.31	114.367	1.552	92.4	-14.828	890.017	79.413	0.218144
2019-01-08 10:15:00	0	227.74	1.544	57.349	2.86	65.633	3.721	72.467	-13.776	889.9	77.696	1.51848
2019-01-08 10:30:00	0	103.4	2.343	81.888	2.551	93.8	2.57	93.8	-13.849	889.683	76.565	2.92327
2019-01-08 10:45:00	0.18	121.203	3.077	98.744	3.665	103.1	4.54	100.867	-13.635	889.85	73.493	6.39652
2019-01-08 11:00:00	1.733	120.083	3.144	106.675	3.949	111.8	4.742	105.733	-13.409	889.958	72.875	9.00359
2019-01-08 11:15:00	0.21	128.71	1.811	101.599	2.716	107.1	3.488	103.6	-13.036	890.133	72.608	8.6682
2019-01-08 11:30:00	2.861	102.937	2.94	98.492	3.282	102.5	4.071	98.6	-12.203	890.033	71.552	8.40387
2019-01-08 11:45:00	5.365	108.623	5.606	100.398	5.502	100.567	5.71	97.033	-12.036	890.267	70.251	11.718
2019-01-08 12:00:00	6.17	91.933	5.683	87.896	5.552	93.633	5.512	91.067	-11.411	889.925	70.048	21.938
2019-01-08 12:15:00	4.832	81.373	4.799	75.424	4.885	82	4.938	79.567	-11.732	889.75	70.283	15.4456
2019-01-08 12:30:00	3.63	77.568	3.707	70.449	3.747	79.7	4.183	76.267	-11.661	890.133	69.685	7.78639
2019-01-08 12:45:00	3.092	93.2	3.058	91.879	2.86	98.5	3.104	96.767	-11.378	889.992	67.669	7.19946
2019-01-08 13:00:00	3.494	103.127	3.452	101.291	3.225	102.867	3.38	99.9	-11.003	890.025	66.293	10.2833
2019-01-08 13:15:00	3.59	84.133	3.468	86.382	3.287	92.767	3.539	88.1	-10.149	890.117	65.269	15.0633
2019-01-08 13:30:00	4.712	74.627	5.027	70.606	5.134	78.6	5.122	73.8	-9.933	890.283	65.131	13.1341
2019-01-08 13:45:00	4.253	76.873	4.215	72.39	4.366	80.067	4.308	76.6	-10.778	889.408	68.384	9.28142
2019-01-08 14:00:00	3.543	76.293	3.658	69.119	3.702	73.567	3.573	73.633	-11.136	889.95	69.92	5.30225
2019-01-08 14:15:00	3.859	78.178	3.814	72.327	3.96	79	3.87	76.2	-10.984	889.558	71.659	6.62319
2019-01-08 14:30:00	4.052	93.46	3.77	88.184	3.905	94.5	4.347	92.367	-10.562	889.875	69.888	10.0503
2019-01-08 14:45:00	4.408	94.6	4.289	90.756	4.153	91.833	4.394	86.633	-10.433	889.4	68.384	19.4717
2019-01-08 15:00:00	6.136	110.62	6.402	104.834	6.402	108.133	6.304	104.967	-9.766	889.883	64.725	21.5778
2019-01-08 15:15:00	5.482	94.727	4.973	90.338	4.624	93.167	4.811	89.867	-9.724	889.675	64.512	19.7651
2019-01-08 15:30:00	6.212	105.307	6.076	100.444	5.883	105.3	6.212	102.7	-9.649	890.25	62.72	28.5996
2019-01-08 15:45:00	6.627	113.16	6.782	109.246	6.846	113.4	6.723	110.733	-9.42	890.092	62.496	35.0942
2019-01-08 16:00:00	7.794	113.067	7.755	104.312	7.579	112.9	7.662	106.367	-9.241	889.875	60.864	33.754
2019-01-08 16:15:00	6.998	110	6.968	103.703	6.831	112.467	6.729	104.7	-9.191	889.775	61.451	32.3834
2019-01-08 16:30:00	5.604	81.86	5.368	79.936	5.302	86.233	5.017	81.967	-9.758	889.758	68.117	19.9342
2019-01-08 16:45:00	3.514	84.767	3.337	82.232	3.06	92.267	3.162	92.833	-10.266	889.908	70.272	8.23902
2019-01-08 17:00:00	3.431	96.727	3.336	100.263	3.649	109.967	4.494	106.7	-10.612	890.5	70.336	6.89605
2019-01-08 17:15:00	4.277	78.687	4.245	76.111	3.93	87.867	3.455	90.333	-10.758	889.858	71.925	6.16559
2019-01-08 17:30:00	3.801	82.947	3.374	81.322	2.886	89.867	2.549	90.167	-11.849	889.958	74.72	5.86644
2019-01-08 17:45:00	3.116	92.333	2.541	89.279	2.013	97.133	2.391	97.733	-12.786	890.108	77.003	3.90314
2019-01-08 18:00:00	1.6	88.663	1.131	89.866	1.129	89.733	1.223	88.267	-13.243	889.917	79.381	3.03128
2019-01-08 18:15:00	1.317	90.05	0.957	86.331	1.853	107.867	2.946	109.933	-13.706	890.175	80.928	3.08812
2019-01-08 18:30:00	2.054	80.833	1.733	86.809	1.577	105.6	2.744	107.1	-14.183	889.888	82.944	1.71389
2019-01-08 18:45:00	1.629	71.247	2.004	72.248	1.477	90	2.732	103.233	-14.745	889.75	83.648	0.449789
2019-01-08 19:00:00	0	164.4	0.04	78.76	1.504	93.133	2.304	101.133	-15.741	890.633	81.963	0.596876
2019-01-08 19:15:00	0	164.4	0	82.228	0.077	75	1.337	93.733	-15.741	889.642	83.925	0.336809
2019-01-08 19:30:00	0.213	196.4	0	82.24	0	74.9	1.522	94.133	-15.724	889.688	85.312	0.333966
2019-01-08 19:45:00	0	196.4	0	82.284	1.46	78.8	2.478	86.9	-15.691	890.204	86.187	0.234487
2019-01-08 20:00:00	0	196.4	0	82.254	0.722	97.433	1.599	103.5	-15.474	889.629	86.059	0.801519
2019-01-08 20:15:00	1.475	235.873	0.223	169.37	0.676	141.267	2.2	110.133	-15.934	889.721	86.357	0.692802
2019-01-08 20:30:00	1.563	228.167	0.03	137.509	0.724	117.667	2.099	98.467	-15.158	889.892	87.68	0.196827
2019-01-08 20:45:00	0.685	234.733	0	137.187	0.755	98.167	2.492	85.767	-15.291	890.05	87.637	0.562058
2019-01-08 21:00:00	0.995	227.267	0.213	113.124	1.633	101.5	2.64	88.6	-15.308	890.071	86.165	3.03554
2019-01-08 21:15:00	0.1	134.407	1.751	97.432	1.948	97.333	2.294	90.433	-15.558	890.058	84.715	4.37425
2019-01-08 21:30:00	0.883	141.5	2.26	105.948	2.269	99.167	2.762	87.067	-15.124	889.871	83.904	5.07984
2019-01-08 21:45:00	1.31	138.373	2.623	105.552	2.646	100.167	3.042	89.933	-15.27	889.725	81.557	5.92044
2019-01-08 22:00:00	2.733	129.367	3.607	110.9	3.755	107.867	3.286	97.6	-14.516	890.267	80.949	6.79373
2019-01-08 22:15:00	2.416	160.987	3.397	124.912	3.396	114.967	3.388	103.433	-14.187	890.142	78.069	5.53176
2019-01-08 22:30:00	2.661	164.067	3.596	125.841	3.768	123.6	4.052	114.7	-14.266	889.875	77.429	5.75346
2019-01-08 22:45:00	2.798	149.567	3.578	121.758	3.947	116.967	4.352	107.4	-14.37	890.317	77.408	5.18429
2019-01-08 23:00:00	2.393	163.833	3.359	123.315	3.741	118.667	4.246	112.467	-14.149	889.558	75.307	5.71864
2019-01-08 23:15:00	2.87	184.967	2.746	146.349	3.013	137.8	3.42	124.567	-14.787	889.825	75.339	3.58197
2019-01-08 23:30:00	2.667	190.267	2.422	142.864	2.51	130.833	3.1	120.1	-15.108	889.65	75.808	1.82758
2019-01-08 23:45:00	2.749	192.12	2.2	153.256	2.452	133.067	3.32	115.8	-14.824	889.758	78.027	0.867602
2019-01-09 00:00:00	3.302	206.067	2.111	169.279	1.995	151.667	2.308	120.1	-15.058	890.292	76.437	0.17551
2019-01-09 00:15:00	3.115	219.007	1.613	192.868	1.563	168.267	1.742	139.967	-14.62	889.958	77.941	0.320465
2019-01-09 00:30:00	3.604	225.9	1.661	206.323	0.848	176.767	0.853	129.433	-14.974	890	76.235	0.36381
2019-01-09 00:45:00	2.876	225.68	0.99	202.815	0.397	170.5	1.26	133.267	-14.454	890.683	78.389	0.335387
2019-01-09 01:00:00	2.967	230.8	0	200.434	0	149.1	0.43	120.033	-14.854	889.683	76.341	0.326861
2019-01-09 01:15:00	3.148	235.96	0	200.483	0	102	0.255	94	-15.185	889.633	76.491	0.331124
2019-01-09 01:30:00	2.912	234.8	0	200.443	0	102	1.294	88.733	-15.608	889.708	76.832	0.335387
2019-01-09 01:45:00	2.751	241.533	0	200.662	0	102.1	0.212	83	-15.558	890.017	77.856	0.326861
2019-01-09 02:00:00	2.848	239.167	0	243.476	0	102	0.862	82	-15.424	889.767	77.653	0.333966
2019-01-09 02:15:00	2.664	236.567	0	227.474	0	51.033	0.8	82.667	-15.774	889.992	77.856	0.33823
2019-01-09 02:30:00	2.97	243.12	0	234.458	0	19.9	0.326	63	-16.019	890.167	77.579	0.343914
2019-01-09 02:45:00	3.683	245.333	1.344	269.426	0	17.033	0.07	63	-16.898	889.925	76.875	0.348178
2019-01-09 03:00:00	4.528	245.667	1.634	280.07	0.203	324.533	0	63.108	-17.831	889.892	76.203	0.341072
2019-01-09 03:15:00	4.276	240.767	1.633	280.483	0	320	0	63.125	-17.748	889.567	78.645	0.341072
2019-01-09 03:30:00	5.006	233.087	2.066	265.013	0	320	0	63.125	-17.889	889.517	77.061	0.333966
2019-01-09 03:45:00	5.047	235.227	2.211	259.885	0.952	286.4	0.034	198.35	-18.468	889.625	77.088	0.335387
2019-01-09 04:00:00	5.301	235.4	2.793	269.226	1.868	285.4	0.954	339	-19.289	889.967	75.531	0.331124
2019-01-09 04:15:00	4.58	237.2	2.523	282.07	2.005	312.933	1.613	338.2	-18.873	889.667	78.683	0.335387
2019-01-09 04:30:00	5.091	234.5	2.854	271.632	2.031	316.2	1.66	334.067	-18.739	890.017	79.381	0.33823
2019-01-09 04:45:00	5.908	229.7	3.446	252.965	2.01	294	1.225	334.933	-19.389	889.875	76.16	0.332545
2019-01-09 05:00:00	5.567	231.033	3.23	244.534	1.953	263.2	0.141	334.033	-19.339	889.975	78.496	0.348178
2019-01-09 05:15:00	5.754	231.867	3.506	244.531	2.535	259.467	1.754	276.667	-19.71	889.725	76.491	0.366652
2019-01-09 05:30:00	5.22	234.367	3.678	247.621	2.666	263	1.958	276.067	-19.473	889.475	77.419	0.321176
2019-01-09 05:45:00	5.583	234.833	4.018	250.496	3.477	260.8	2.737	269.067	-19.623	889.842	76.171	0.227381
2019-01-09 06:00:00	5.172	236.9	4.116	252.517	3.232	258	2.666	264.167	-19.656	889.492	77.301	0.427761
2019-01-09 06:15:00	5.336	235.4	4.337	255.242	3.658	265.267	3.255	264.5	-19.306	890.1	78.112	1.11417
2019-01-09 06:30:00	4.798	225.793	4.325	253.295	3.707	262.6	3.18	264.2	-19.885	889.917	77.557	1.82616
2019-01-09 06:45:00	4.799	233.067	3.792	254.764	3.268	267.667	2.818	265.467	-19.539	890	79.067	0.316913
2019-01-09 07:00:00	4.554	233.8	3.673	259.145	3.157	269.8	2.642	266.933	-19.356	890.117	77.648	0.341783
2019-01-09 07:15:00	5.352	230.347	4.133	256.222	3.674	265.8	3.085	266.167	-19.877	889.85	76.443	0.542162
2019-01-09 07:30:00	5.628	230.333	4.353	251.464	4.054	259.067	3.569	263.2	-19.656	890.175	76.843	1.06443
2019-01-09 07:45:00	5.741	232.467	4.761	249.067	4.374	255.733	3.976	255.283	-19.589	890.008	75.445	2.1722
2019-01-09 08:00:00	5.712	229.267	4.698	246.384	4.144	255.467	3.462	251.367	-19.656	889.958	76.448	2.28731
2019-01-09 08:15:00	6.075	224.8	4.204	238.31	3.784	247.967	3.133	248.7	-19.656	889.508	76.747	1.84179
2019-01-09 08:30:00	5.831	223.167	4.345	233.439	3.982	241.467	3.498	240.167	-19.473	890.117	75.669	1.67267
2019-01-09 08:45:00	5.756	222.033	4.05	234.713	3.759	241.067	3.255	234	-19.539	890	76.011	0.913789
2019-01-09 09:00:00	5.249	227.853	3.686	241.464	3.334	250.167	3.048	247	-19.698	890.125	75.339	0.142113
2019-01-09 09:15:00	5.136	227.133	4.018	251.675	3.675	260.133	3.346	252.483	-20.431	889.925	74.805	0.108717
2019-01-09 09:30:00	5.405	232.96	3.704	253.488	3.262	260.733	3.045	257.417	-20.198	889.9	75.403	0.051871
2019-01-09 09:45:00	5.036	232.867	2.911	254.432	2.252	262.467	1.892	264.033	-19.589	889.908	73.547	0.346046
2019-01-09 10:00:00	5.254	228.967	2.952	254.457	2.218	264	1.586	264	-18.706	889.717	72.021	0.33823
2019-01-09 10:15:00	4.463	225.967	2.779	249.415	1.91	264	1.385	260.2	-17.731	889.292	71.339	0.342493
2019-01-09 10:30:00	4.391	228.58	2.926	248.405	1.965	251.033	1.673	241.167	-16.743	889.683	72.011	0.333966
2019-01-09 10:45:00	3.55	227.7	3.106	252.27	2.568	264	1.921	244.967	-14.924	889.983	71.008	0.333966
2019-01-09 11:00:00	2.208	227.56	3.134	238.03	2.859	255.167	2.071	250.233	-13.259	889.858	69.291	0.336809
2019-01-09 11:15:00	1.597	250.187	1.89	253.473	2.302	273.8	2.392	268.033	-11.016	889.8	66.923	0.309097
2019-01-09 11:30:00	1.77	264.067	1.791	262.849	1.891	276.433	1.32	268.4	-10.154	889.683	62.24	0.316913
2019-01-09 11:45:00	2.082	276.187	2.165	275.426	2.058	278.467	1.86	268.6	-10.422	889.975	59.163	0.328282
2019-01-09 12:00:00	0.363	305.48	0.422	303.657	0.433	308.767	0.078	268.533	-10.554	890	57.899	0.328282
2019-01-09 12:15:00	0.027	306.64	0	322.981	0	316.967	0.044	268.133	-9.233	889.6	54.208	0.293464
2019-01-09 12:30:00	0	347.107	0	311.023	0	299.4	0.03	268.3	-6.969	890.208	47.595	0.326861
2019-01-09 12:45:00	0	154.587	0	148.315	0	114	0.155	162.1	-7.399	890	42.891	0.332545
2019-01-09 13:00:00	0	66.237	0	115.331	0.053	161.267	0.044	163.233	-5.984	889.6	39.872	0.331124
2019-01-09 13:15:00	0.765	61.731	0.87	137.366	0.954	157.767	1.045	205.271	-7.572	889.8	40.184	0.32544
2019-01-09 13:30:00	1.34	123.476	0.976	70.56	0.979	63.433	1.098	26.473	-8.434	889.9	43.936	0.331124
2019-01-09 13:45:00	1.173	38.278	1.023	43.674	1.326	56.9	1.481	59.033	-7.94	889.883	44.672	0.33823
2019-01-09 14:00:00	1.779	118.16	1.825	112.502	2.011	119.367	1.943	107.4	-7.88	890.15	43.819	0.339651
2019-01-09 14:15:00	0.762	77.779	0.41	53.12	0.544	96.267	0.346	67.933	-7.406	889.983	44.875	0.353862
2019-01-09 14:30:00	2.224	30.74	2.041	38.745	2.143	31.904	2.098	20.568	-8.708	889.925	50.149	0.329703
2019-01-09 14:45:00	1.79	50.981	1.452	33.017	1.323	26.8	1.424	31.633	-8.758	889.8	51.893	0.339651
2019-01-09 15:00:00	1.98	69.387	2.033	66.801	2.222	25.334	2.153	22.1	-8.774	889.95	52.933	0.339651
2019-01-09 15:15:00	2.226	19.548	2.129	18.88	2.167	33.833	2.085	34	-8.608	889.825	54.165	0.332545
2019-01-09 15:30:00	2.42	27.994	2.424	25.673	2.599	33.267	2.673	25.667	-8.674	889.883	55.392	0.355283
2019-01-09 15:45:00	1.888	103.235	1.683	145.424	1.657	66.234	1.241	244.9	-8.674	890.033	56.037	0.341072
2019-01-09 16:00:00	1.724	96.792	1.603	111.031	1.811	52.102	1.676	52.667	-8.891	890.017	56.491	0.335387
2019-01-09 16:15:00	2.348	174.678	2.059	217.626	2.138	246.8	2.053	291.8	-8.991	889.717	56.752	0.309807
2019-01-09 16:30:00	1.211	20.779	1.216	191.028	1.63	192.367	1.556	130.333	-9.291	889.733	57.835	0.302701
2019-01-09 16:45:00	0.522	275.733	0	262.255	0	280.133	0	316.9	-8.841	889.833	57.243	0.306965
2019-01-09 17:00:00	0.856	188.44	0.55	190.98	0.939	209.9	1.081	182.033	-8.371	890.017	55.797	0.312649
2019-01-09 17:15:00	2.055	158.573	2.065	156.426	2.263	163.933	2.451	157.733	-8.688	889.942	56.715	0.353862
2019-01-09 17:30:00	2.077	127.63	1.885	129.361	2.209	140.433	2.478	144.467	-8.621	889.567	60.341	0.213881
2019-01-09 17:45:00	2.529	27.465	2.216	158.803	1.904	113.367	1.789	101.633	-8.841	889.817	60.997	0.660116
2019-01-09 18:00:00	2.056	106.148	2.085	349.542	2.175	199.733	1.947	215.367	-9.558	889.833	63.76	0.358126
2019-01-09 18:15:00	2.394	283.6	2.478	350.833	2.478	354.1	2.012	59.533	-10.333	889.675	67.237	0.324018
2019-01-09 18:30:00	2.656	8.032	1.287	4.017	1.72	1.167	2.058	352	-11.018	889.85	68.395	0.348178
2019-01-09 18:45:00	0	17.06	0	0	0	0	0.06	352.067	-11.716	889.742	71.029	0.346757
2019-01-09 19:00:00	0.648	120.113	0	0	0	23.733	0	352	-12.162	889.208	73.76	0.312649
2019-01-09 19:15:00	0	120.1	0	0	0	11.867	0	351.933	-12.553	889.675	75.957	0.319755
2019-01-09 19:30:00	1.593	201.433	0	0	0	0	0	352	-12.553	890.158	78.283	0.316913
2019-01-09 19:45:00	2.488	221.727	1.578	211.642	0.027	262.433	0.521	300.633	-12.445	889.825	78.293	0.328282
2019-01-09 20:00:00	3.102	229.44	2.279	214.445	1.487	221	1.457	260.167	-12.157	889.825	77.269	0.329703
2019-01-09 20:15:00	2.573	230.4	1.739	214.608	1.64	221.167	1.761	226	-11.89	890.167	75.797	0.332545
2019-01-09 20:30:00	2.073	219.427	2.105	223.13	2.087	223.5	2.172	227.2	-11.745	889.858	75.776	0.33823
2019-01-09 20:45:00	2.895	229.9	1.828	241.08	1.754	250.967	1.784	244.033	-12.953	889.675	73.205	0.348178
2019-01-09 21:00:00	3.711	218.933	2.313	254.466	1.38	258	1.007	244.05	-12.57	890.075	71.723	0.360968
2019-01-09 21:15:00	3.141	233	1.431	257.842	0.731	258	0.943	244.117	-13.484	889.933	70.843	0.341072
2019-01-09 21:30:00	3.286	198.673	0.176	244.985	0	258	0	244.017	-14.416	889.883	71.541	0.342493
2019-01-09 21:45:00	4.999	212.773	2.844	198.641	1.646	203.667	0	244	-14.412	889.542	66.325	0.333966
2019-01-09 22:00:00	4.761	216.867	3.629	226.962	1.794	241	1.239	219.533	-15.358	889.9	67.947	0.335387
2019-01-09 22:15:00	4.019	208.867	2.884	189.152	2.295	212.2	2.566	229.567	-13.999	889.683	76.181	0.332545
2019-01-09 22:30:00	4.645	201.473	3.053	180.979	2.878	195.3	2.738	204.9	-13.428	889.817	72.427	0.341072
2019-01-09 22:45:00	4.754	217.793	3.256	199.845	2.864	214.767	3.38	220.267	-12.278	889.558	74.197	0.307675
2019-01-09 23:00:00	5.588	224.98	3.733	216.086	3.321	224.633	3.315	224.333	-13.653	889.6	65.451	0.22596
2019-01-09 23:15:00	5.435	220.92	3.709	220.248	3.045	232.2	2.69	231.867	-13.597	890.183	65.92	0.046897
2019-01-09 23:30:00	4.692	215.86	3.189	235.729	2.801	252.2	2.952	249.367	-15.435	889.467	64.917	0.156325
2019-01-09 23:45:00	5.622	220.6	3.495	225.368	3.204	237.433	2.861	235	-15.691	889.45	70.784	0.897446
2019-01-10 00:00:00	5.378	225.333	5.476	217.226	4.025	220.867	3.006	218.533	-14.924	890.05	67.264	1.00971
2019-01-10 00:15:00	5.914	223.467	5.568	219.379	4.933	228.7	3.846	226.7	-14.337	889.958	65.077	0.483896
2019-01-10 00:30:00	6.721	220.267	5.51	215.596	4.904	219.867	4.528	219.633	-13.949	889.867	62.891	1.67196
2019-01-10 00:45:00	5.226	213.387	5.979	211.882	5.237	211.2	4.908	204.067	-14.271	889.05	63.317	2.83303
2019-01-10 01:00:00	5.972	213	5.342	212.271	4.469	212	4.118	201.833	-14.908	890.142	65.301	1.91356
2019-01-10 01:15:00	6.62	218.233	6.633	214.091	5.991	218.733	5.129	215.533	-15.324	890.067	67.968	3.59547
2019-01-10 01:30:00	6.122	217.76	6.232	217.206	5.074	224.933	4.222	222.433	-14.641	889.783	65.867	4.17671
2019-01-10 01:45:00	6.181	218.153	5.719	219.817	4.866	228.733	3.834	229.267	-14.495	889.392	65.131	5.44791
2019-01-10 02:00:00	6.384	218.967	6.596	219.234	5.096	226.1	4.137	227.533	-14.474	890.1	64.885	5.00381
2019-01-10 02:15:00	5.936	221.573	4.609	227.379	3.864	237.7	3.216	237.767	-14.191	889.65	63.925	4.50712
2019-01-10 02:30:00	5.054	225.933	4.722	221.182	3.314	229.4	2.508	229.733	-14.049	889.625	62.517	1.67694
2019-01-10 02:45:00	5.384	214.5	5.496	208.067	4.88	212.767	3.902	210.7	-14.578	890.075	64.085	1.19162
2019-01-10 03:00:00	6.032	219.72	5.192	208.957	4.562	211.1	3.691	207.267	-14.754	890.025	64.619	1.08859
2019-01-10 03:15:00	4.197	221.367	5.42	211.115	4.154	212.067	3.439	208.933	-15.658	889.9	66.144	1.04169
2019-01-10 03:30:00	4.97	211.5	6.272	202.137	5.589	203.867	5.066	202.667	-15.374	889.708	66.667	1.36855
2019-01-10 03:45:00	4.985	209.333	5.646	193.276	4.94	192.133	4.4	184.4	-15.108	889.8	66.549	0.756753
2019-01-10 04:00:00	6.238	214.967	5.823	198.469	4.529	197.767	3.937	186.233	-14.266	889.525	63.605	0.174799
2019-01-10 04:15:00	6.299	214.733	6.316	197.7	5.46	201.833	4.533	194.6	-14.266	889.275	61.792	0.944343
2019-01-10 04:30:00	5.978	209.3	6.602	199.277	4.613	202.033	3.542	191.9	-14.37	889.808	62.72	0.79015
2019-01-10 04:45:00	5.212	214.5	5.546	203.162	3.889	203.467	3.068	193	-15.208	889.55	61.6	0.152061
2019-01-10 05:00:00	5.366	213.9	5.303	204.641	3.511	208.267	2.447	197.067	-15.891	889.783	63.883	0.18759
2019-01-10 05:15:00	3.687	229.287	6.105	212.526	4.322	212.733	3.509	209.933	-16.546	889.967	63.829	0.110848
2019-01-10 05:30:00	5.866	225.333	4.313	216.86	2.943	219.033	2.679	210	-15.374	889.8	64.224	0.11227
2019-01-10 05:45:00	2.89	179.96	3.978	187.491	4.478	199.933	4.347	203.2	-17.298	889.917	64.8	0.156325
2019-01-10 06:00:00	3	191.827	1.849	154.369	1.539	131.967	1.704	130.7	-14.449	889.708	62.933	0.296306
2019-01-10 06:15:00	3.061	214.033	1.187	158.923	1.019	124	0.906	124.967	-15.324	889.842	59.968	0.328282
2019-01-10 06:30:00	2.62	203.46	0	152.503	1.388	104.1	0.05	124.967	-14.899	889.983	62.016	0.318334
2019-01-10 06:45:00	2.695	178.807	0.626	145.504	1.531	99.033	0.938	125	-14.72	889.808	71.445	0.319755
2019-01-10 07:00:00	1.648	172.367	1.542	107.233	1.155	99	0.809	125	-12.97	890.375	67.787	0.319755
2019-01-10 07:15:00	1.783	190.2	1.222	107.272	0.771	99	0.853	125	-13.053	889.858	68.491	0.318334
2019-01-10 07:30:00	2.346	195.2	1.155	137.135	1.266	98.933	1.198	125	-13.02	889.775	68.821	0.311228
2019-01-10 07:45:00	1.756	197.767	0.938	142.672	0.726	140.933	1.096	125.1	-12.62	890.275	67.136	0.309807
2019-01-10 08:00:00	1.231	196.267	0	128.461	0	140.733	0	125.1	-12.67	889.792	66.549	0.31407
2019-01-10 08:15:00	2.243	221.133	0	128.375	0	140.7	0	124.867	-12.986	889.933	64.779	0.304123
2019-01-10 08:30:00	2.029	196	0	128.544	0	140.433	0.212	125	-12.52	889.858	64.192	0.316913
2019-01-10 08:45:00	0.599	199.2	0	128.504	0	140.633	0.705	121.367	-12.22	890.092	63.371	0.329703
2019-01-10 09:00:00	1.52	219.153	0	128.479	0	140	0.289	69.067	-11.911	889.9	63.456	0.328282
2019-01-10 09:15:00	2.488	235.933	1.546	237.723	0.113	191.267	0	69	-11.89	889.867	59.573	0.328282
2019-01-10 09:30:00	3.041	244.567	1.511	266.736	0.47	318	1.128	24.93	-11.495	890.008	55.077	0.322597
2019-01-10 09:45:00	3.17	253.807	1.764	303.708	1.931	333.767	2.218	351.133	-10.722	889.983	49.733	0.333966
2019-01-10 10:00:00	1.172	262.18	1.58	333.794	1.947	69.4	1.95	319.933	-11.97	889.592	53.381	0.333966
2019-01-10 10:15:00	0.68	118.11	1.738	9.125	2.112	16.008	2.091	15.933	-12.101	889.892	52.021	0.333966
2019-01-10 10:30:00	0	46.146	1.619	22.739	1.777	25.167	1.603	15.667	-12.77	889.875	54.229	0.329703
2019-01-10 10:45:00	0.173	346.96	1.891	268.738	1.845	352.633	1.511	233.433	-11.661	889.817	54.683	0.352441
2019-01-10 11:00:00	1.016	335.04	1.114	344.542	1.106	348.967	0	350.033	-11.07	889.917	54.357	0.341072
2019-01-10 11:15:00	0.898	151.8	0.11	340.451	0.277	342.3	0.488	292.7	-10.416	890.05	52.373	0.336809
2019-01-10 11:30:00	0.712	350.667	0.562	340.399	1.033	344.7	0.611	4	-10.333	889.942	52.304	0.348178
2019-01-10 11:45:00	0.246	16.83	0	343.237	0.027	0	1.418	38.7	-9.487	890.075	49.931	0.26291
2019-01-10 12:00:00	0.872	35.833	0.303	49.567	0.872	77.1	1.491	98.333	-8.674	890.325	45.76	0.48887
2019-01-10 12:15:00	2.006	88.127	1.994	79.96	2.231	87.533	2.434	84.033	-8.808	889.867	45.973	0.618193
2019-01-10 12:30:00	2.709	69.263	2.728	67.215	2.913	77.3	2.983	78.167	-8.824	889.975	45.888	1.94624
2019-01-10 12:45:00	3.724	68.343	3.578	65.476	3.603	71.533	3.527	73.6	-8.093	889.633	44.213	3.22384
2019-01-10 13:00:00	3.843	45.297	3.586	41.205	3.45	51.533	2.956	54.333	-9.024	889.792	49.12	4.77003
2019-01-10 13:15:00	4.026	56.96	3.862	56.75	3.919	62.1	4.132	60.567	-8.741	890.075	50.165	5.9851
2019-01-10 13:30:00	4.515	65.063	4.394	60.512	4.819	67.9	4.981	68.067	-8.841	890.3	50.795	6.95574
2019-01-10 13:45:00	4.048	65.02	4.322	62.8	4.344	70.867	4.564	70.133	-8.641	889.817	52.811	7.47729
2019-01-10 14:00:00	4.026	61.422	3.954	61.241	4.08	67.033	4.22	65.133	-8.25	890.05	52.896	7.40482
2019-01-10 14:15:00	3.851	69.34	4.036	66.101	4.01	72.467	4.229	65.433	-8.311	889.792	54.315	7.18667
2019-01-10 14:30:00	4.018	64.032	3.81	63.439	4.088	70.467	4.433	70.567	-8.38	889.825	55.509	6.8655
2019-01-10 14:45:00	3.494	71.097	3.59	68.346	3.862	75.3	3.786	71.2	-8.13	889.833	53.931	5.81173
2019-01-10 15:00:00	3.673	68.647	3.647	69.575	3.731	73.667	3.99	70.633	-8.331	889.508	53.803	5.26459
2019-01-10 15:15:00	3.985	71.033	3.929	66.807	4.094	71.2	4.489	70.6	-8.25	889.675	53.675	5.61206
2019-01-10 15:30:00	3.439	71.36	3.453	70.317	3.709	75.433	3.848	71.1	-8.01	889.925	55.456	4.74161
2019-01-10 15:45:00	3.15	66.982	3.202	61.082	3.568	66.9	3.899	67.167	-8.25	890.033	56.405	3.65516
2019-01-10 16:00:00	3.268	73.812	3.36	70.366	3.365	74.9	3.602	70.367	-8.23	889.808	57.877	3.05473
2019-01-10 16:15:00	3.315	55.56	3.058	50.928	2.868	61.1	2.807	63.1	-8.638	889.842	59.68	3.10091
2019-01-10 16:30:00	2.967	56.55	2.616	54.737	2.568	60.7	2.692	65.7	-8.808	890.125	60.832	3.25795
2019-01-10 16:45:00	3.797	65.97	3.685	63.568	3.713	71.633	3.801	70.2	-9.108	889.833	62.357	4.05023
2019-01-10 17:00:00	3.902	76.53	3.825	71.517	3.884	75.8	4.042	71.167	-9.091	890.042	64.64	6.11514
2019-01-10 17:15:00	3.365	61.977	3.252	58.761	3.246	64.667	3.589	66.667	-9.008	889.767	64.725	4.27051
2019-01-10 17:30:00	3.868	67.14	3.698	64.202	3.933	71.667	4.106	69.633	-9.174	889.817	65.696	5.36762
2019-01-10 17:45:00	3.582	74.767	3.557	71.024	3.809	78.833	3.995	75.933	-9.758	889.75	67.552	5.14024
2019-01-10 18:00:00	3.079	69.19	3.201	70.247	3.201	80.533	3.418	80.067	-9.724	889.167	69.077	3.42848
2019-01-10 18:15:00	2.666	61.867	2.583	61.967	2.521	70.433	2.543	66.1	-10.333	889.817	70.379	0.90242
2019-01-10 18:30:00	2.296	58.573	2.134	63.369	2.372	77.433	2.116	75.4	-11.124	889.742	72.896	0.235198
2019-01-10 18:45:00	1.063	28.056	1.637	42.433	1.261	55.933	1.27	70.867	-11.901	889.75	74.325	0.331835
2019-01-10 19:00:00	1.785	15.719	1.584	14.105	1.277	37.333	0.027	71	-12.47	890.092	77.195	0.309807
2019-01-10 19:15:00	0.759	11.783	0	23.048	0	33.9	0	71.033	-12.986	890	78.923	0.302701
2019-01-10 19:30:00	1.721	142.16	1.746	1.003	1.576	13.003	1.179	21.1	-12.803	889.925	80.256	0.328282
2019-01-10 19:45:00	0.282	0	0	0	0.42	13.033	0.138	20.867	-13.136	889.908	79.925	0.321176
2019-01-10 20:00:00	0.479	200.013	0	0	0	13.051	0	21	-13.466	889.442	80.96	0.332545
2019-01-10 20:15:00	0	353.213	0	0	0	12.797	0	38.933	-13.651	889.808	81.355	0.331124
2019-01-10 20:30:00	1.04	269.493	0	325.166	0	12.916	0	39.067	-13.522	890.312	82.24	0.326861
2019-01-10 20:45:00	1.53	243.267	0.666	283.513	0	12.833	0	39	-13.578	890.004	83.147	0.322597
2019-01-10 21:00:00	2.303	236.867	1.214	235.456	0	212.033	0.047	264	-13.578	890.142	83.627	0.32544
2019-01-10 21:15:00	1.836	244.407	1.114	238.576	0.14	212.7	0.144	264	-13.395	889.942	83.115	0.331124
2019-01-10 21:30:00	1.162	260.787	0.16	247.452	0.127	221.5	0	264	-13.778	889.642	81.909	0.322597
2019-01-10 21:45:00	1.839	295.08	1.331	282.969	0.783	284.2	0.302	265	-13.207	890.096	83.541	0.311228
2019-01-10 22:00:00	2.715	267.307	1.676	285.185	1.218	284.667	0.872	264.967	-13.833	889.775	79.477	0.304123
2019-01-10 22:15:00	3.097	262.48	2.177	284.129	1.722	284.3	1.815	265.133	-14.066	889.667	79.755	0.332545
2019-01-10 22:30:00	2.33	245	1.896	267.502	1.772	284.233	2.288	283.667	-13.689	889.925	78.677	0.343914
2019-01-10 22:45:00	2.822	246.84	2.137	281.916	2.001	298.1	2.469	285.4	-13.301	890.067	77.584	0.346757
2019-01-10 23:00:00	2.892	260.12	1.752	280.883	2.183	298.367	2.143	306.967	-13.522	890.142	78.411	0.331124
2019-01-10 23:15:00	2.288	276.92	1.979	315.248	1.975	334.633	2.006	341.267	-13.336	890.392	78.144	0.362389
2019-01-10 23:30:00	1.39	283.52	1.567	340.941	1.604	26.54	2.368	17.9	-13.07	890.075	77.483	0.359547
2019-01-10 23:45:00	1.622	288.933	1.109	324.835	1.301	0.134	2.6	25	-12.803	889.517	79.083	0.358126
2019-01-11 00:00:00	2.602	251.927	1.117	281.009	0.297	314.467	1.041	16.048	-13.222	889.767	77.568	0.355283
2019-01-11 00:15:00	2.984	260.4	1.837	267.184	0.826	275.333	0.32	310.3	-13.17	889.858	79.6	0.32544
2019-01-11 00:30:00	2.294	264.14	0.927	263.135	0.05	268.467	0	295.867	-13.19	889.925	80.224	0.324018
2019-01-11 00:45:00	1.827	255.8	0	262.843	0	268.5	0	296.067	-13.036	889.717	79.499	0.328282
2019-01-11 01:00:00	2.741	250.267	0.718	263.156	0	268	0	295.867	-13.07	890.15	79.84	0.328282
2019-01-11 01:15:00	2.898	253.133	1.491	251.577	0.52	254.9	0	296	-13.086	889.792	80.608	0.331124
2019-01-11 01:30:00	3.211	255.207	1.76	251.53	0.623	255.133	0	296.067	-12.803	889.475	80.491	0.335387
2019-01-11 01:45:00	3.802	256.513	2.515	264.453	1.596	255.317	0	296	-13.428	889.325	76.757	0.341072
2019-01-11 02:00:00	3.97	247.433	2.624	265.026	1.717	255.133	0	296.033	-13.867	888.1	76.512	0.345335
2019-01-11 02:15:00	3.611	252.52	2.48	262.923	1.864	255.2	0	296	-13.172	890.133	76.864	0.31407
2019-01-11 02:30:00	4.172	251.18	2.982	258.763	2.089	255	0	296	-13.279	888.775	74.779	0.316913
2019-01-11 02:45:00	5.137	244.393	3.445	252.085	2.199	255	0.155	295.8	-13.879	888.85	73.707	0.321176
2019-01-11 03:00:00	4.646	241.047	3.156	248.343	1.992	250.567	0.235	272	-14.559	886.933	73.515	0.32544
2019-01-11 03:15:00	4.824	239.933	2.812	247.484	1.444	250.1	0	272	-14.896	881.183	75.008	0.316913
2019-01-11 03:30:00	5.682	235.547	3.944	245.468	2.548	243.133	1.175	264.5	-14.457	883.075	74.155	0.319755
2019-01-11 03:45:00	5.83	233.58	4.498	247.534	3.154	244	2.021	244.733	-14.766	889.533	74.016	0.345335
2019-01-11 04:00:00	5.621	233.787	5.238	244.398	3.83	245	3.169	243.067	-14.808	889.608	74.059	0.682144
2019-01-11 04:15:00	4.453	234.727	4.441	247.39	3.526	250.7	3.5	247.867	-13.541	890.133	72.693	1.38845
2019-01-11 04:30:00	4.712	240.067	4.825	253.915	4.318	261.3	4.279	258.767	-13.766	889.65	71.76	2.9659
2019-01-11 04:45:00	3.984	245.14	4.2	261.26	3.927	270.133	3.895	268.167	-13.522	889.825	71.813	2.94317
2019-01-11 05:00:00	3.949	250.3	3.973	272.77	3.556	286	3.758	287.267	-12.986	889.883	72.277	2.99433
2019-01-11 05:15:00	3.4	257.54	3.153	290.954	3.155	306.533	3.132	302.2	-12.436	889.317	70.261	0.783755
2019-01-11 05:30:00	3.569	246.273	2.943	275.079	2.674	297.2	2.568	304	-12.29	889.808	69.568	0.553531
2019-01-11 05:45:00	3.867	237.213	3.141	256.35	2.671	278	2.599	286.333	-12.182	889.333	68.688	0.291332
2019-01-11 06:00:00	4.103	232.8	3.07	255.497	2.797	268	2.772	272.5	-11.578	889.75	66.944	0.102322
2019-01-11 06:15:00	3.389	233.007	1.955	260.407	1.921	268	1.905	273	-11.64	889.483	68.501	0.129323
2019-01-11 06:30:00	3.964	236.733	2.77	260.096	2.164	273.867	2.14	273	-11.228	889.942	67.696	0.358126
2019-01-11 06:45:00	3.79	237.433	3.234	262.288	2.871	277.933	2.608	278.833	-11.378	889.808	68.389	0.219565
2019-01-11 07:00:00	4.431	226.267	3.161	254.141	3	267.467	3.173	267.1	-11.311	889.908	68.875	0.1009
2019-01-11 07:15:00	4.598	231.18	3.713	243.462	3.157	258.067	2.896	260.133	-11.059	889.683	68.523	0.518714
2019-01-11 07:30:00	4.029	234.16	3.61	245.493	3.06	257.233	2.6	258.033	-10.853	890.133	67.712	0.613219
2019-01-11 07:45:00	4.436	230.933	4.115	240.475	3.912	248.267	3.408	245.3	-10.703	889.85	68.64	2.86571
2019-01-11 08:00:00	5.298	226.84	5.077	238.26	4.94	245.033	4.667	239.967	-10.834	890.008	70.069	7.21723
2019-01-11 08:15:00	4.852	221.013	4.859	227.62	4.87	234	4.69	229.433	-10.999	889.917	73.643	7.79634
2019-01-11 08:30:00	4.353	228.967	4.295	233.18	4.269	237.667	4.012	230.733	-11.228	889.983	75.637	3.94791
2019-01-11 08:45:00	3.77	239.38	3.077	242.444	2.926	248.533	2.713	243.867	-10.685	889.917	77.717	1.24989
2019-01-11 09:00:00	3.652	236.167	3.521	252.154	3.239	257.667	2.997	255.217	-10.797	889.717	76.661	0.140692
2019-01-11 09:15:00	3.801	234.873	3.454	250.556	3.254	256	3.204	254.367	-10.741	890.125	75.861	0.337519
2019-01-11 09:30:00	4.628	231.747	3.21	247.531	3.07	256.433	2.956	255.317	-11.126	889.975	76.928	0.334677
2019-01-11 09:45:00	5.413	224.767	3.927	228.628	3.414	237	2.869	234.467	-11.361	889.7	74.123	1.04809
2019-01-11 10:00:00	4.344	245.48	3.644	252.819	3.126	265.133	2.986	256.433	-9.974	890.075	75.861	1.20654
2019-01-11 10:15:00	3.422	247.78	3.183	254.694	3.056	269	2.902	259.633	-8.067	889.892	68.907	0.27641
2019-01-11 10:30:00	4.134	228.807	2.827	231.205	2.564	248.2	2.328	245.733	-8.287	890.358	63.264	0.359547
2019-01-11 10:45:00	2.582	241.78	3.258	232.662	2.947	234.967	2.334	221.733	-7.264	890.1	65.141	0.120086
2019-01-11 11:00:00	2.215	236.7	1.318	228.315	1.764	204.067	2.027	208.467	-5.585	889.725	61.941	0.194695
2019-01-11 11:15:00	2.386	244.387	2.444	236.798	2.494	237.1	2.704	228.167	-4.398	889.717	59.157	0.078162
2019-01-11 11:30:00	2.738	292.733	2.916	285.935	3.202	283.1	3.112	266.367	-5.119	889.958	59.771	0.085268
2019-01-11 11:45:00	3.144	318	3.163	307.227	3.391	307.2	3.345	296.3	-5.202	889.858	59.408	0.231645
2019-01-11 12:00:00	3.316	325.267	3.25	317.433	3.354	318.8	3.512	309.667	-4.952	889.667	59.317	0.080294
2019-01-11 12:15:00	3.273	331.413	3.119	322.447	3.296	324.067	3.457	317.367	-4.59	889.683	61.824	0.132165
2019-01-11 12:30:00	2.611	322.48	2.578	318.796	2.513	324.467	2.61	319.233	-4.209	889.85	60.843	0.133586
2019-01-11 12:45:00	2.979	320.487	3.065	335.429	3.145	336.867	3.045	338	-3.919	889.483	60.928	0.103032
2019-01-11 13:00:00	2.297	336	2.393	325.555	2.439	328.433	2.404	324.133	-3.84	890.175	58.944	0.261488
2019-01-11 13:15:00	2.028	319.733	2.181	316.724	2.192	322.167	2.159	328.133	-3.991	890.2	57.221	0.247988
2019-01-11 13:30:00	2.125	280.967	1.979	324.226	2.173	324.867	2.41	329.3	-3.572	889.65	56.544	0.182616
2019-01-11 13:45:00	2.621	339.733	2.631	332.505	2.753	337.067	2.747	335.567	-3.723	889.683	55.861	0.549979
2019-01-11 14:00:00	2.905	335.4	2.91	330.02	2.988	334.833	3.002	333.133	-3.488	889.633	54.811	0.160588
2019-01-11 14:15:00	2.636	312.467	2.513	331.464	2.798	335.467	2.971	334.3	-3.204	890.042	58.011	0.171957
2019-01-11 14:30:00	2.309	247.633	2.489	302.285	2.639	274.433	2.579	279.533	-3.521	890.2	57.611	0.323308
2019-01-11 14:45:00	1.439	311.253	0.977	308.673	1.036	316.7	1.22	315.567	-3.21	890.283	56.267	0.32544
2019-01-11 15:00:00	0.895	51.867	0.363	107.936	0.353	282.367	0.35	66.4	-3.004	889.592	54.816	0.274279
2019-01-11 15:15:00	1.564	29.384	1.317	109.211	1.472	9.967	1.407	6.667	-2.784	889.642	54.352	0.287069
2019-01-11 15:30:00	2.084	319.653	1.763	309.658	1.929	324.733	1.912	304.133	-2.882	890.008	55.371	0.306965
2019-01-11 15:45:00	1.404	116.264	1.32	300.662	1.459	321.867	1.532	321.933	-2.805	889.967	56.779	0.291332
2019-01-11 16:00:00	2.137	330.573	1.894	321.539	1.828	327.5	1.591	330.567	-2.495	889.875	56.101	0.28849
2019-01-11 16:15:00	1.116	255.255	0.703	322.539	1.45	306.833	1.749	320.267	-2.114	890.083	56.299	0.292753
2019-01-11 16:30:00	1.997	297.453	1.884	319.436	2.037	327.133	1.991	309.9	-2.104	889.858	55.952	0.289911
2019-01-11 16:45:00	1.216	300.44	0.749	303.396	0.69	298.733	0.502	294.6	-2.144	889.583	56.229	0.285648
2019-01-11 17:00:00	0.313	327.187	0.13	316.754	0.17	298.033	0.034	298.867	-1.733	889.992	55.867	0.28849
2019-01-11 17:15:00	1.045	111.276	0.423	69.443	0.47	239.4	0.729	298.6	-2.021	889.75	55.909	0.281384
2019-01-11 17:30:00	1.941	9.759	1.282	8.819	1.089	13.3	0.766	2.267	-2.091	889.633	57.077	0.291332
2019-01-11 17:45:00	2.202	56.675	1.915	50.03	1.944	51.067	1.647	37	-2.853	890.025	59.797	0.299859
2019-01-11 18:00:00	2.427	66	1.95	66.258	1.827	72	1.693	70.467	-3.388	889.883	62.645	0.284227
2019-01-11 18:15:00	1.428	68.663	1.391	63.165	0.863	69.9	0.776	71.067	-4.401	889.85	65.696	0.295596
2019-01-11 18:30:00	1.878	76.727	1.619	78.83	1.595	99.033	1.553	89	-4.779	889.525	68.715	0.297017
2019-01-11 18:45:00	0.126	76.1	0.846	79.272	1.432	109	1.559	89.033	-5.069	890.317	70.4	0.305544
2019-01-11 19:00:00	0.363	76.1	0.27	79.865	0.384	108.967	0.272	89	-5.569	889.883	73.003	0.315492
2019-01-11 19:15:00	1.794	110.1	1.066	102.243	1.319	118.067	1.468	89.9	-5.569	889.792	71.264	0.30128
2019-01-11 19:30:00	1.866	142.96	0.903	132.592	0.88	154.633	1.276	184.333	-5.185	889.942	69.611	0.30128
2019-01-11 19:45:00	1.891	142.5	1.524	135.632	1.396	140.833	0.054	149	-4.952	889.892	69.525	0.30128
2019-01-11 20:00:00	2.937	200.633	2.358	170.683	1.685	178.433	1.74	200.7	-5.352	889.783	69.781	0.321176
2019-01-11 20:15:00	4.329	225.74	2.255	224.56	2.627	230.033	2.72	217.367	-6.614	889.933	65.163	0.270726
2019-01-11 20:30:00	2.805	215.767	5.15	222.46	4.926	223.5	3.682	214	-8.658	889.992	69.941	0.28849
2019-01-11 20:45:00	1.21	214.227	5.617	229.097	5.426	227.533	4.618	214.2	-9.645	889.683	74.016	0.705592
2019-01-11 21:00:00	2.507	227.773	5.142	227.17	4.781	227.733	4.097	222.933	-7.36	889.642	71.755	0.466842
2019-01-11 21:15:00	1.016	226.987	4.959	233.872	5.16	230.45	4.744	223.167	-8.758	889.858	75.061	0.248698
2019-01-11 21:30:00	3.948	222.353	4.801	229.332	4.755	233.9	4.629	221.533	-8.197	889.558	75.467	0.306965
2019-01-11 21:45:00	1.503	147.787	1.764	150.722	1.999	169.2	2.717	187.733	-7.15	889.8	73.355	0.25154
2019-01-11 22:00:00	0.129	103.343	0	124.239	0	104	0	161	-7.134	889.625	70.763	0.321176
2019-01-11 22:15:00	2.521	255.627	1.457	241.41	0	117.083	0.044	161.567	-8.627	889.85	73.877	0.315492
2019-01-11 22:30:00	1.952	272.513	1.292	251.839	1.289	246.967	0.88	230	-7.873	889.975	74.421	0.302701
2019-01-11 22:45:00	2.352	217.42	1.896	232.051	1.547	227.1	0.06	230	-8.648	889.7	74.453	0.30128
2019-01-11 23:00:00	3.572	168.26	2.12	174.685	1.184	165.867	0.376	227.067	-7.559	890.183	75.851	0.305544
2019-01-11 23:15:00	4.129	163.827	3.268	137.58	2.93	137.8	2.448	136.967	-7.642	889.308	72.917	0.287069
2019-01-11 23:30:00	3.173	177.773	3.231	120.618	2.946	116.8	2.581	106.6	-8.488	889.6	74.453	0.171247
2019-01-11 23:45:00	3.124	133.58	3.454	92.423	3.206	86.067	3.253	67.833	-7.863	889.858	75.371	0.164141
2019-01-12 00:00:00	2.899	102.2	3.087	73.476	3.446	75.3	3.579	74.633	-6.562	889.933	71.061	0.139271
2019-01-12 00:15:00	2.686	124.58	2.387	89.859	2.427	86.033	2.251	84.5	-6.595	889.558	72.043	0.152772
2019-01-12 00:30:00	1.797	133.977	2.108	90.51	2.322	85.3	2.102	80.733	-7.699	889.667	74.101	0.274279
2019-01-12 00:45:00	0.116	116.757	1.45	74.24	1.615	78.033	1.577	73.2	-8.25	890.317	77.131	0.277832
2019-01-12 01:00:00	0	127.167	1.335	68.051	1.586	69.433	1.968	72.633	-8.291	889.758	80.64	0.254383
2019-01-12 01:15:00	1.143	281.133	0.653	147.441	1.39	41.071	1.925	60.833	-7.639	889.912	82.347	0.147798
2019-01-12 01:30:00	0.835	282.707	0.28	2.678	1.532	37.821	2.272	51.167	-7.466	890.25	79.787	0.22525
2019-01-12 01:45:00	0	264.733	0.317	4.019	1.687	58.333	2.93	66.6	-7.606	889.475	79.104	0.324018
2019-01-12 02:00:00	0	265.173	0	4.015	1.46	51.1	2.999	68	-7.796	889.583	80.235	0.335387
2019-01-12 02:15:00	0.871	259.44	0	4.018	0	55.042	0.537	71.967	-8.17	889.867	81.227	0.333966
2019-01-12 02:30:00	0.688	243.407	0	328.922	0	55.033	0	72	-8.504	889.521	81.387	0.319755
2019-01-12 02:45:00	0.402	240.42	0	328.824	0	55	1.826	83.533	-8.481	889.996	83.605	0.316913
2019-01-12 03:00:00	0.986	222.833	0	311.603	0	104.067	0.608	106.333	-8.624	889.65	83.499	0.321176
2019-01-12 03:15:00	1.8	237.733	0	263.016	0	104	0	107	-8.574	889.896	81.013	0.33823
2019-01-12 03:30:00	3.422	241.2	0.326	259.987	0.28	120.867	1.252	127.467	-9.141	890	77.483	0.331124
2019-01-12 03:45:00	3.127	238.367	2.169	249.606	2.1	246.233	2.026	231.8	-8.908	889.717	73.397	0.333966
2019-01-12 04:00:00	3.685	216.34	1.052	231.861	0.473	235	0.148	223.9	-10.11	889.583	65.056	0.324018
2019-01-12 04:15:00	4.921	216.2	1.948	226.685	0.854	240	0.185	224	-13.003	889.792	71.819	0.319755
2019-01-12 04:30:00	5.47	226.213	2.715	230.633	1.992	245.5	1.676	237.667	-10.145	889.65	74.507	0.322597
2019-01-12 04:45:00	2.839	230.887	1.427	251.179	1.353	277.8	1.71	261.067	-9.383	890.058	74.581	0.322597
2019-01-12 05:00:00	3.532	232.433	0.616	271.121	1.122	278	1.377	266.567	-9.191	889.792	69.077	0.319755
2019-01-12 05:15:00	3.368	220.807	0.06	263.035	0	278	0.131	267.533	-8.337	889.975	66.379	0.322597
2019-01-12 05:30:00	6.033	220.76	2.861	213.865	1.406	227.267	0.087	247.333	-11.728	890.083	64.384	0.316913
2019-01-12 05:45:00	3.854	231.273	1.486	213.396	0.03	220	0	212	-10.724	889.8	71.467	0.315492
2019-01-12 06:00:00	2.411	251.293	2.236	298.68	2.002	297.667	0.941	278.033	-8.941	890.133	66.549	0.324018
2019-01-12 06:15:00	2.214	270.967	3.16	306.293	3.373	317.467	2.788	317.967	-10.091	890.008	66.517	0.342493
2019-01-12 06:30:00	2.642	252.6	2.366	307.885	2.625	320.967	2.724	304	-10.67	889.958	63.995	0.341072
2019-01-12 06:45:00	4.159	235.653	3.286	256.986	3.639	283.4	4.096	281.7	-14.087	889.783	68.661	0.208907
2019-01-12 07:00:00	4.266	231.033	3.309	256.162	3.209	279.6	3.181	279.033	-12.836	889.525	73.504	0.139271
2019-01-12 07:15:00	4.174	246.88	3.218	264.325	2.934	282.133	2.956	284.933	-11.528	890.025	73.861	0.684986
2019-01-12 07:30:00	3.601	254.387	3.44	270.854	3.087	281.333	2.568	278.6	-10.058	890.183	69.317	0.113691
2019-01-12 07:45:00	4.099	250.007	2.961	260.558	2.139	277.933	2.027	282.967	-10.254	889.908	66.736	0.185458
2019-01-12 08:00:00	2.95	246.667	2.322	257.565	2.256	278	2.331	274.067	-9.945	889.183	67.963	0.142824
2019-01-12 08:15:00	4.171	231.953	2.621	251.211	2.679	273.067	2.794	275.8	-11.553	890.067	65.456	0.149929
2019-01-12 08:30:00	3.752	237.447	1.619	228.897	1.876	262.8	2.971	268.233	-12.532	889.8	69.024	0.081004
2019-01-12 08:45:00	2.97	227.2	0.81	234.025	1.881	261	2.771	268.833	-11.428	889.725	75.392	0.176931
2019-01-12 09:00:00	3.51	230.007	2.388	217.409	2.538	243	3.259	236.724	-10.749	889.966	74.041	0.22596
2019-01-12 09:15:00	2.348	225.86	1.411	210.286	1.268	233.1	1.644	259.667	-10.539	889.608	73.632	0.331835
2019-01-12 09:30:00	4.62	215.413	2.385	212.057	1.591	216.367	1.569	213.9	-11.209	889.983	62.645	0.342493
2019-01-12 09:45:00	4.435	219.993	1.95	207.43	0.647	216	0.313	209.167	-10.666	889.933	62.965	0.332545
2019-01-12 10:00:00	2.904	194.673	2.332	172.176	1.957	168.267	1.57	209	-9.337	889.933	67.339	0.33823
2019-01-12 10:15:00	3.365	219.9	2.116	210.481	1.467	182.667	1.998	210.167	-7.091	890.342	59.36	0.35102
2019-01-12 10:30:00	2.659	217.007	0.816	195.471	0.083	180.067	2.257	217.633	-7.243	889.65	58.731	0.326861
2019-01-12 10:45:00	0.503	219.493	0	195.39	0	179.933	0.282	214	-5.763	890.3	58.688	0.335387
2019-01-12 11:00:00	0	213.14	0	195.511	0.027	200.133	0.796	185.867	-4.474	890.008	54.432	0.345335
2019-01-12 11:15:00	1.344	82.897	0.199	114.396	0	200	0.03	186.1	-5.763	889.992	54.976	0.333966
2019-01-12 11:30:00	1.696	124.633	1.012	109.913	0.409	108.867	0.164	188.867	-6.562	889.892	55.829	0.333966
2019-01-12 11:45:00	1.108	84.987	0.353	87.635	0.186	90.733	0	158.1	-5.687	890.3	56.213	0.331124
2019-01-12 12:00:00	0.898	90.53	0.1	85.247	0.173	86.067	0.168	116.9	-4.749	889.758	55.435	0.326861
2019-01-12 12:15:00	0.562	90.783	0.076	73.272	0.077	75.867	0.067	99.033	-4.238	889.617	49.931	0.318334
2019-01-12 12:30:00	0.935	38.633	0.43	41.987	0.899	48.167	0.481	60.433	-3.171	890.033	45.984	0.318334
2019-01-12 12:45:00	0.353	37.967	0.333	31.1	0.512	26.2	0.332	7.367	-3.739	889.7	44.501	0.321176
2019-01-12 13:00:00	0.576	81.473	0.386	71.379	0.466	78.867	0.342	65	-2.99	889.792	43.2	0.315492
2019-01-12 13:15:00	0	109.02	0.027	70.014	0.286	69.833	0.299	61.1	-3.013	889.683	42.123	0.302701
2019-01-12 13:30:00	0.599	110.708	0.336	79.032	0.742	71.833	1.118	74.367	-2.333	889.817	42.379	0.311228
2019-01-12 13:45:00	1.702	104.97	1.373	104.998	1.194	111	1.062	81.1	-1.962	889.725	41.717	0.318334
2019-01-12 14:00:00	1.383	82.58	1.27	88.187	1.542	85.7	1.589	81.067	-2.098	889.85	42.549	0.318334
2019-01-12 14:15:00	1.727	55.242	1.15	52.225	1.146	53.9	1.166	52.6	-1.463	889.717	43.136	0.311228
2019-01-12 14:30:00	1.619	33.65	1.653	45.241	1.868	49.5	1.478	48.167	-2.051	890.067	43.179	0.306965
2019-01-12 14:45:00	1.742	38.859	1.674	45.874	1.873	60.167	2.256	62.433	-2.071	889.967	43.115	0.311228
2019-01-12 15:00:00	2.105	22.874	2.206	24.795	2.308	29.733	2.307	31.3	-2.395	890.208	43.189	0.326861
2019-01-12 15:15:00	2.252	28.279	1.996	26.874	2.132	28.233	2.11	25.067	-1.93	889.892	43.872	0.311228
2019-01-12 15:30:00	2.469	41.53	2.167	35.296	2.388	38.6	2.683	37.367	-1.826	889.808	44.629	0.174089
2019-01-12 15:45:00	1.943	51.154	1.716	47.953	2.202	50.667	2.345	42.967	-2.012	889.842	45.568	0.104453
2019-01-12 16:00:00	1.98	46.27	1.412	43.845	1.307	50.5	0.938	42.833	-1.68	889.783	45.621	0.35102
2019-01-12 16:15:00	2.134	28.747	2.04	30.064	2.219	35.667	2.153	37.067	-1.813	889.592	46.741	0.299859
2019-01-12 16:30:00	1.593	53.233	1.21	49.337	1.697	46.667	1.804	28.333	-1.978	890.408	47.712	0.304123
2019-01-12 16:45:00	1.3	36.11	1.06	28.774	1.613	31.367	1.565	26.533	-2.17	889.933	48.288	0.297017
2019-01-12 17:00:00	1.766	68.985	1.482	68.888	1.597	80.7	1.641	66.767	-1.762	889.642	48.416	0.297017
2019-01-12 17:15:00	0.466	75.293	0.123	87.239	0	95.867	0	79.867	-2.378	889.933	49.28	0.292753
2019-01-12 17:30:00	0	75.187	0	87.22	0	96	0	80	-2.058	890.1	48.544	0.294175
2019-01-12 17:45:00	0	75.16	0	87.251	0	96	0	80	-2.048	889.7	48.971	0.292753
2019-01-12 18:00:00	1.169	28.057	0.116	47.114	0	77.233	0	80	-2.394	889.925	50.912	0.297017
2019-01-12 18:15:00	0	28.008	0	47.136	0	31	0	80	-3.026	889.658	53.568	0.295596
2019-01-12 18:30:00	0.538	63.4	0	47.124	0	31	0	80.067	-3.321	889.767	57.12	0.297017
2019-01-12 18:45:00	0.555	118.933	0	47.149	0	31	0	79.933	-3.79	889.875	58.112	0.297017
2019-01-12 19:00:00	0	138	0	47.137	0	31.067	0	80	-3.823	889.983	58.464	0.298438
2019-01-12 19:15:00	0.063	198.853	0.047	47.134	0.492	30.9	0.027	79.967	-4.527	890.05	59.221	0.298438
2019-01-12 19:30:00	0.216	338.4	0	47.115	0	31	0	79.967	-5.019	889.908	61.739	0.297017
2019-01-12 19:45:00	0.406	316.933	0.12	43.284	0.3	27.1	0	80	-4.421	889.608	61.845	0.305544
2019-01-12 20:00:00	0.719	336.387	0.356	0	0.5	0	0.48	0	-6.243	890.067	59.072	0.305544
2019-01-12 20:15:00	1.869	340.88	1.058	345.108	0.82	0	0.175	0	-6.764	889.925	64.661	0.312649
2019-01-12 20:30:00	1.848	278.113	0.329	320.985	0	0	0	11.867	-7.522	889.917	65.749	0.305544
2019-01-12 20:45:00	3.362	249.367	1.991	262.64	0.323	297.9	1.252	275.3	-8.207	889.85	65.264	0.316913
2019-01-12 21:00:00	3.899	276.627	3.697	291.678	3.164	299.667	2.668	309.133	-8.331	889.825	69.424	0.321176
2019-01-12 21:15:00	3.134	310.8	3.935	317.998	3.818	323.9	3.495	320.6	-8.624	890.167	69.995	0.171957
2019-01-12 21:30:00	3.515	273.88	3.633	282.679	3.866	294.967	4.07	298.2	-9.724	889.758	70.699	0.157035
2019-01-12 21:45:00	4.16	255.607	3.604	288.044	3.447	304.3	3.543	311.8	-9.828	889.725	71.472	1.33302
2019-01-12 22:00:00	3.693	244.447	2.65	286.566	2.497	314.467	2.484	316.2	-9.974	889.692	71.104	0.574848
2019-01-12 22:15:00	3.224	242.933	2.226	274.91	2.124	302	2.114	316.6	-9.241	889.867	72.181	0.306965
2019-01-12 22:30:00	3.036	242.333	2.196	261.035	2.461	278.067	2.878	281.9	-8.991	889.633	70.544	0.111559
2019-01-12 22:45:00	2.938	246.627	2.39	284.864	2.791	299.533	3.22	299.267	-8.908	889.567	66.779	0.491712
2019-01-12 23:00:00	3	260.493	2.712	303.643	3.144	319.667	3.466	322.267	-10.078	889.992	70.688	0.683565
2019-01-12 23:15:00	3.052	261.247	3.168	298.525	3.516	313.1	3.871	313.733	-9.787	888.983	71.109	2.27523
2019-01-12 23:30:00	3.662	260.1	3.354	294.775	3.484	309.433	3.807	308.5	-10.183	890.05	70.843	4.04312
2019-01-12 23:45:00	3.781	260.033	3.456	289.058	3.628	301.833	3.678	301.433	-10.483	889.817	72.517	4.20371
2019-01-13 00:00:00	4.016	257.613	3.452	282.324	3.496	296.1	3.932	294.067	-10.76	889.692	74.384	3.91096
2019-01-13 00:15:00	4.564	231.047	3.581	254.979	3.419	268.733	3.734	275.733	-11.159	889.75	73.472	2.92327
2019-01-13 00:30:00	5.578	223.927	4.13	241.054	3.768	251.3	3.475	256.167	-11.711	889.533	72.256	2.30508
2019-01-13 00:45:00	5.55	220.413	4.156	226.507	3.603	235.867	3.138	235.9	-11.732	889.992	74.955	3.06254
2019-01-13 01:00:00	5.858	216.847	4.454	220.958	3.891	227.467	3.284	231.067	-11.766	889.908	74.123	3.75748
2019-01-13 01:15:00	6.283	217.7	6.45	226.363	5.812	231.133	5.102	228.233	-12.503	890.05	73.28	6.28852
2019-01-13 01:30:00	6.534	213.8	6.22	218.287	5.729	223.333	5.225	223.1	-12.386	889.483	74.027	10.6756
2019-01-13 01:45:00	5.982	214.547	5.546	219.747	5.14	226.267	4.652	225.2	-11.87	889.967	73.088	9.63386
2019-01-13 02:00:00	5.834	212.627	5.419	228.322	4.498	237.633	3.787	236.2	-10.947	890.017	71.445	8.15446
2019-01-13 02:15:00	5.038	212.9	5.699	228.991	5.369	236.067	4.71	231	-11.461	889.817	72.416	7.6258
2019-01-13 02:30:00	5.016	221.567	5.786	231.209	5.512	242.967	5.046	242.533	-10.891	889.708	72.821	9.25087
2019-01-13 02:45:00	5.704	223.467	6.462	233.142	5.962	243.9	5.646	243.667	-9.912	889.625	68	11.1218
2019-01-13 03:00:00	6.504	230.007	7.533	237.285	7.461	247.4	7.325	246	-9.433	889.975	65.077	18.7689
2019-01-13 03:15:00	5.179	225.967	6.314	236.191	6.976	249.033	6.649	247.35	-8.808	889.683	62.336	27.5409
2019-01-13 03:30:00	5.528	229.927	6.86	235.157	7.398	245.7	7.165	244.867	-7.502	889.933	62.848	41.048
2019-01-13 03:45:00	5.24	239.547	6.526	245.316	6.596	255.633	6.693	255.517	-7.23	890.083	61.109	33.0819
2019-01-13 04:00:00	5.44	243.707	7.076	252.096	7.741	259.367	8.086	255.667	-6.928	890.158	60.032	30.4002
2019-01-13 04:15:00	5.252	241.173	5.877	245.743	6.384	252.5	6.599	248.983	-5.786	889.7	57.099	32.9952
2019-01-13 04:30:00	4.243	223.2	4.576	228.526	5.289	240.233	5.507	240.533	-5.535	889.825	55.285	25.8767
2019-01-13 04:45:00	4.98	218.26	6.019	226.141	6.588	234.767	6.472	232.467	-5.763	889.908	55.264	21.857
2019-01-13 05:00:00	5.114	215.16	5.612	223.418	6.148	236.267	6.15	237.667	-5.978	889.725	56.416	23.5595
2019-01-13 05:15:00	4.675	224.167	5.732	230.064	5.745	241.333	5.491	241.9	-6.545	890.033	58.368	22.1604
2019-01-13 05:30:00	4.898	225.533	5.015	239.074	4.999	256.2	5.114	260.7	-6.578	889.925	58.592	18.0861
2019-01-13 05:45:00	3.642	242.567	3.998	264.326	4.563	273.4	5.072	270.767	-6.047	890.475	58.747	14.6931
2019-01-13 06:00:00	3.357	263.247	4.67	276.814	5.264	282.833	5.726	278.633	-5.452	890.075	58.832	16.9037
2019-01-13 06:15:00	5.886	263.093	7.288	269.197	7.94	274.733	8.135	271.05	-4.812	890.042	59.088	35.1951
2019-01-13 06:30:00	6.287	263.8	7.938	267.271	8.631	272.867	8.914	268.7	-4.729	889.758	59.344	52.4512
2019-01-13 06:45:00	7.547	257.047	9.31	263.418	9.808	267.133	9.858	263.35	-4.969	890.125	62.005	52.3908
2019-01-13 07:00:00	6.123	252.353	7.625	256.19	8.151	261.233	8.332	256.517	-5.319	889.65	63.755	47.743
2019-01-13 07:15:00	6.42	247.733	7.255	248.264	7.535	252.233	7.674	247.85	-5.598	889.825	64.021	45.5743
2019-01-13 07:30:00	6.146	242.607	7.661	244.119	8.293	251.3	8.249	246.817	-5.918	889.85	64.821	44.6151
2019-01-13 07:45:00	5.673	238.473	7.656	240.352	8.234	246.4	8.155	242.333	-6.017	890.167	65.387	44.7451
2019-01-13 08:00:00	6.779	243.287	8.218	242.063	8.661	247.967	8.583	243.9	-6.339	889.8	67.2	43.9734
2019-01-13 08:15:00	5.6	232.54	6.329	234.942	6.627	242.633	6.76	240.367	-6.084	890.258	65.237	42.4862
2019-01-13 08:30:00	4.64	233.867	5.867	236.166	6.326	245.767	6.432	243.767	-6.495	890.017	67.893	32.6868
2019-01-13 08:45:00	4.127	234.573	6.066	239.528	6.973	248.933	6.685	246.233	-6.515	889.725	69.397	31.5172
2019-01-13 09:00:00	4.774	237.02	6.4	242.184	7.013	249.7	7.176	246.35	-6.372	889.842	70.251	30.9637
2019-01-13 09:15:00	6.47	244.507	8.332	246.194	8.849	250.833	8.727	246	-5.868	889.975	70.421	42.585
2019-01-13 09:30:00	6.422	244.907	7.959	246.428	8.673	253.767	8.88	251.233	-5.369	889.833	69.312	60.7243
2019-01-13 09:45:00	6.987	248.133	8.555	248.859	8.728	254.7	8.821	251.9	-5.035	890.175	67.605	50.2634
2019-01-13 10:00:00	6.486	244.68	7.538	241.777	8.159	246.917	8.114	242.2	-4.424	890.025	65.557	46.7347
2019-01-13 10:15:00	6.276	241.06	7.152	242.674	7.447	251.833	7.649	249.467	-4.468	889.983	65.12	46.6061
2019-01-13 10:30:00	7.225	243.147	8.334	244.687	8.856	249.8	8.914	246.55	-4.345	890.017	65.973	43.788
2019-01-13 10:45:00	6.958	238.867	7.565	237.065	7.877	243.65	8.015	240.667	-3.404	890.3	63.029	51.0997
2019-01-13 11:00:00	3.778	243.82	3.974	242.031	4.252	249.517	4.371	247.05	-3.05	889.517	61.344	33.9772
2019-01-13 11:15:00	5.411	256.393	6.214	258.17	6.55	263.517	6.612	260.933	-2.456	889.75	58.453	24.6531
2019-01-13 11:30:00	5.97	259.553	6.539	259.458	6.62	263.6	6.595	258.217	-2.214	890.033	56.859	25.1718
2019-01-13 11:45:00	6.338	277.973	7.037	279.246	7.055	284.3	7.288	279.467	-2.578	890.142	58.091	34.0973
2019-01-13 12:00:00	5.745	283.28	6.331	282.279	6.619	286.133	6.888	280.767	-2.879	889.975	58.501	35.1766
2019-01-13 12:15:00	9.093	263.313	9.977	266.903	10.324	271.1	10.222	266.183	-2.512	890.292	57.611	62.7906
2019-01-13 12:30:00	9.222	267.467	10.228	272.91	10.67	277.733	10.716	273.5	-2.679	889.667	57.211	67.8129
2019-01-13 12:45:00	10.764	251.733	11.576	256.498	11.94	261.8	11.952	259.567	-2.639	889.95	56.4	68.2258
2019-01-13 13:00:00	10.275	250.593	11.281	253.431	11.23	258.25	11.344	253.567	-2.243	889.733	54.187	69.4479
2019-01-13 13:15:00	9.815	259.047	10.673	264.803	11.185	271.3	11.203	266.4	-2.932	889.842	55.243	66.7336
2019-01-13 13:30:00	9.552	267.533	10.195	269.699	10.261	274.167	10.315	267.6	-2.902	889.75	53.573	66.0919
2019-01-13 13:45:00	8.683	272	9.56	272.331	9.567	276.267	9.681	272.4	-2.74	890.133	51.536	69.6839
2019-01-13 14:00:00	9.206	267.727	10.119	273.02	10.336	278.467	10.425	275.833	-3.029	889.642	51.344	70.2736
2019-01-13 14:15:00	9.027	277.233	9.729	275.467	10.388	279.967	10.423	276.133	-3.287	889.542	51.568	69.5254
2019-01-13 14:30:00	8.036	279.033	8.829	282.505	8.988	283.9	9.181	279.6	-3.689	889.942	52.992	69.3222
2019-01-13 14:45:00	8.75	266.367	8.915	272.608	9.289	276.267	9.374	271.617	-3.605	889.525	53.003	62.7125
2019-01-13 15:00:00	9.201	269.6	9.974	274.87	10.152	278.6	10.178	273.6	-3.504	889.525	51.429	58.8832
2019-01-13 15:15:00	8.194	261.167	9.038	269.044	9.351	273.867	9.465	270.7	-2.938	889.917	50.405	56.262
2019-01-13 15:30:00	9.034	261.22	9.561	264.438	9.784	270.167	9.74	267.767	-2.821	889.658	49.397	51.9531
2019-01-13 15:45:00	9.134	255.22	10.041	265.532	10.204	270.5	10.46	265.383	-2.801	889.992	49.269	54.87
2019-01-13 16:00:00	9.263	271.673	9.91	275.618	10.091	279.8	10.189	276.233	-2.626	890.083	49.568	52.5826
2019-01-13 16:15:00	9.232	264.487	10.183	267.236	10.239	273.067	10.263	268.833	-2.304	889.575	49.013	56.9768
2019-01-13 16:30:00	8.969	270.707	9.814	276.894	10.077	281.833	9.981	278.6	-2.821	889.85	49.253	57.5111
2019-01-13 16:45:00	7.559	275.053	8.256	276.327	8.428	281.333	8.545	275.633	-2.582	889.692	49.68	46.4078
2019-01-13 17:00:00	7.26	270.68	7.99	273.839	8.306	278.667	8.45	274.633	-2.618	889.7	49.808	38.8445
2019-01-13 17:15:00	6.214	263.527	6.806	262.619	6.919	269.6	6.881	266.683	-2.929	889.883	50.848	39.4094
2019-01-13 17:30:00	7.366	248.473	8.001	253.769	8.5	258.15	8.492	253.667	-3.034	890.017	50.837	41.5987
2019-01-13 17:45:00	6.458	249.733	7.142	253.69	7.588	256.167	7.509	252.083	-3.505	889.533	51.707	46.8619
2019-01-13 18:00:00	7.057	244.013	7.917	250.474	8.309	253.1	8.334	248.8	-3.728	890.167	52.395	50.5767
2019-01-13 18:15:00	7.678	238.487	8.462	243.441	8.962	248.567	8.984	244.6	-4.364	890.283	53.685	61.0512
2019-01-13 18:30:00	5.816	247.767	7.351	253.498	8.042	258.617	8.19	254.85	-4.802	889.925	54.619	51.9957
2019-01-13 18:45:00	5.608	245.907	6.788	248.765	7.293	253.183	7.442	250.2	-5.302	889.908	56.395	45.9687
2019-01-13 19:00:00	6.211	236.093	7.667	237.114	8.149	244.433	8.387	240.167	-5.598	889.992	57.141	62.3004
2019-01-13 19:15:00	6.855	240.62	8.34	244.736	8.842	248.533	9.016	243.133	-5.958	890.183	58.411	46.7077
2019-01-13 19:30:00	5.266	218.467	6.877	222.798	7.519	231.533	7.584	228.867	-6.362	890.05	59.2	38.4999
2019-01-13 19:45:00	6.641	220.96	8.737	220.572	8.866	227.333	8.568	225.5	-7.502	889.742	62.293	49.3147
2019-01-13 20:00:00	5.902	228.9	7.524	230.154	7.933	237.267	7.906	234.333	-7.456	889.85	63.456	41.2178
2019-01-13 20:15:00	5.18	214.007	7.089	214.291	7.343	221.9	7.195	221.367	-8.371	889.825	64.853	31.859
2019-01-13 20:30:00	5.851	221.78	7.178	225.889	7.344	234.2	7.176	232.9	-8.317	890.15	66.411	31.466
2019-01-13 20:45:00	5.628	225.533	6.721	234.53	6.8	244	6.602	243.267	-8.624	889.942	66.219	27.7945
2019-01-13 21:00:00	6.01	210.593	7.673	214.433	7.531	226.067	7.123	228.433	-9.508	890.058	67.328	28.6643
2019-01-13 21:15:00	5.6	221.06	7.194	224.072	7.131	232.8	6.674	231.267	-9.766	890.067	68.533	31.7737
2019-01-13 21:30:00	6.157	226.3	7.331	228.823	7.52	236.133	7.235	232.867	-9.174	889.867	67.36	30.5153
2019-01-13 21:45:00	6.07	228.833	7.782	233.22	7.796	242.3	7.506	238.7	-9.391	889.833	66.443	33.0925
2019-01-13 22:00:00	4.555	212.833	6.533	223.702	6.737	235.233	6.421	234.6	-9.291	889.858	66.549	29.9866
2019-01-13 22:15:00	5.49	222.88	6.567	227.836	6.712	237.267	6.432	235.5	-9.683	890.175	68.469	24.6055
2019-01-13 22:30:00	4.699	212.333	5.969	219.281	5.988	228.533	5.739	227.033	-9.874	889.458	69.12	16.1476
2019-01-13 22:45:00	5.633	211.867	6.959	215.625	6.583	225.1	6.185	224.533	-10.433	889.817	69.856	17.4572
2019-01-13 23:00:00	6.164	214.867	7.264	216.98	7.031	222.7	6.708	220.733	-10.266	889.908	69.376	18.7526
2019-01-13 23:15:00	5.999	216.407	7.066	218.236	6.555	223.567	5.821	221.6	-10.818	890.025	70.677	14.8992
2019-01-13 23:30:00	5.68	212.873	6.744	216.805	5.866	221.833	5.507	220.467	-10.928	889.633	71.296	12.5465
2019-01-13 23:45:00	5.788	216.233	6.52	220.236	5.67	226.833	5.293	227.433	-11.095	889.825	71.221	11.2341
2019-01-14 00:00:00	5.325	217.567	6.45	219.499	5.705	226.433	5.153	226.767	-11.195	889.442	71.147	10.0176
2019-01-14 00:15:00	6.139	217.927	6.143	222.958	5.579	234.333	5.038	234.2	-11.59	889.6	71.765	10.2457
2019-01-14 00:30:00	6.276	216.033	6.799	218.756	5.989	225.833	5.223	226.3	-11.445	889.983	71.84	10.6486
2019-01-14 00:45:00	6.738	218.187	7.366	218.718	6.93	225.333	6.101	223.2	-11.807	889.85	71.883	15.312
2019-01-14 01:00:00	6.05	218.033	6.936	215.918	6.212	219.633	5.395	219.333	-11.578	889.708	71.435	12.0874
2019-01-14 01:15:00	5.982	218.933	6.336	221.02	5.503	227.733	5.049	226.967	-11.328	890.025	70.368	10.2215
2019-01-14 01:30:00	6	217.927	6.283	220.1	5.379	225.8	4.658	227.567	-11.849	889.725	70.699	7.54267
2019-01-14 01:45:00	5.311	213.007	5.583	213.511	4.959	221.033	4.184	218.767	-12.14	889.883	71.04	4.70182
2019-01-14 02:00:00	5.25	215.007	5.426	215.221	4.03	221.233	3.266	222.7	-12.24	890.05	71.243	2.94246
2019-01-14 02:15:00	5.196	217.4	5.655	213.022	4.92	216.067	4.065	212.6	-12.62	889.842	71.723	2.39532
2019-01-14 02:30:00	6.408	219.033	5.879	214.744	5.238	217.6	4.14	212.1	-12.236	889.858	71.104	2.91403
2019-01-14 02:45:00	6.193	220.233	5.504	216.923	4.752	218.267	3.798	216.567	-12.099	889.683	70.005	3.80508
2019-01-14 03:00:00	5.142	212.3	5.981	215.938	4.694	219.367	3.051	213.833	-12.486	890.05	69.141	2.4948
2019-01-14 03:15:00	5.488	214.833	5.471	216.981	4.537	221.367	3.078	219.833	-13.02	889.592	71.221	2.75629
2019-01-14 03:30:00	4.802	206.933	5.772	211.381	4.956	212.633	4.172	210.5	-13.18	889.808	71.403	1.91853
2019-01-14 03:45:00	5.309	206.733	4.951	204.516	4.679	210.467	4.15	208.133	-13.297	890.067	73.173	1.62293
2019-01-14 04:00:00	4.566	211.833	4.862	204.628	4.363	207.067	3.951	206.8	-13.136	890.142	71.915	1.17457
2019-01-14 04:15:00	4.562	217.46	4.637	202.804	4.227	207.733	3.578	206.1	-13.284	889.617	72.949	0.998346
2019-01-14 04:30:00	5.632	217.413	4.632	204.793	4.071	207	3.384	203	-13.466	889.792	73.376	0.621746
2019-01-14 04:45:00	5.306	218.147	3.716	204.626	3.218	207	2.744	204	-13.653	890.05	73.067	0.083136
2019-01-14 05:00:00	4.583	215.3	4.179	203.349	3.338	206.033	2.572	199.967	-14.116	889.808	74.069	0.221697
2019-01-14 05:15:00	5.87	217	4.514	200.548	3.133	200	2.704	196.067	-14.099	890.108	74.933	0.303412
2019-01-14 05:30:00	6.088	218.907	3.893	199.018	2.985	199.967	2.311	193	-13.616	889.783	73.909	0.30128
2019-01-14 05:45:00	6.596	216.733	3.756	203.261	2.47	202.767	1.871	192.733	-13.02	889.733	73.067	0.319755
2019-01-14 06:00:00	6.246	214.133	3.474	196.982	2.533	198.033	1.593	193	-13.07	889.658	70.912	0.304123
2019-01-14 06:15:00	6.89	217.7	3.912	200.48	2.742	199.033	2.022	191.8	-13.766	889.733	71.595	0.298438
2019-01-14 06:30:00	6.383	213.4	4.162	191.309	2.973	194.8	2.24	175.3	-13.899	889.967	71.808	0.295596
2019-01-14 06:45:00	5.555	213.467	5.03	186.928	3.91	181.067	3.085	174.267	-14.183	890.067	72.128	0.120796
2019-01-14 07:00:00	6.016	216.687	4.941	188.076	3.562	176.8	2.493	165.033	-14.391	889.625	72.139	0.135008
2019-01-14 07:15:00	5.946	215.567	4.842	194.319	4.346	192.267	3.77	175.067	-14.199	889.992	71.915	0.660116
2019-01-14 07:30:00	5.351	213.733	5.329	191.037	4.567	183.167	3.846	170.5	-14.249	889.525	71.637	1.15396
2019-01-14 07:45:00	5.281	213.553	4.996	190.512	4.042	177.4	3.26	169.233	-14.254	889.983	71.573	1.75439
2019-01-14 08:00:00	5.284	212.107	4.178	181.111	3.122	176.167	2.482	159.9	-14.308	889.7	71.893	2.65254
2019-01-14 08:15:00	5.541	211.98	4.573	180.115	3.454	176.3	2.832	160.233	-14.87	890.267	71.573	2.84511
2019-01-14 08:30:00	5.058	209.213	3.7	171.433	3.107	160.267	3.068	147.933	-13.747	889.908	70.613	2.8245
2019-01-14 08:45:00	4.937	205.067	3.62	170.203	2.926	159.6	3.088	145.333	-13.203	890.208	69.685	2.85364
2019-01-14 09:00:00	4.607	204.107	4.112	173.438	3.235	163.867	3.112	146.9	-13.632	890.217	69.003	3.64308
2019-01-14 09:15:00	5.301	201.4	4.395	165.651	3.697	154.733	3.4	141.567	-14.049	889.7	68.811	3.95786
2019-01-14 09:30:00	4.881	201.2	4.133	161.522	3.455	151.3	3.189	138.633	-12.753	889.9	67.264	5.18287
2019-01-14 09:45:00	4.738	205.067	5.322	171.352	4.154	162.467	4.048	148.267	-12.853	889.8	65.515	7.9484
2019-01-14 10:00:00	4.235	205.7	5.019	178.924	4.186	172.767	3.774	154.467	-12.336	889.925	65.696	9.19544
2019-01-14 10:15:00	4.134	201.633	4.93	175.711	4.02	167.567	3.812	153.767	-10.414	889.675	64.597	9.26437
2019-01-14 10:30:00	4.615	198.853	4.798	175.517	3.911	170.6	3.662	155.567	-9.828	889.592	62.507	11.902
2019-01-14 10:45:00	3.63	189.033	4.188	163.312	3.955	160.933	3.816	149.067	-8.207	889.933	59.499	13.3729
2019-01-14 11:00:00	4.122	158.133	4.642	144.868	4.42	144.233	4.352	136	-7.422	889.975	47.915	19.6607
2019-01-14 11:15:00	4.149	152.66	4.253	146.502	4.677	149.1	5.09	144.5	-6.175	889.783	40.784	20.3144
2019-01-14 11:30:00	3.933	130.72	3.976	125.427	4.236	129.567	4.39	125.033	-5.664	889.883	39.056	18.4172
2019-01-14 11:45:00	7.312	120.657	8.091	115.408	8.264	121.633	8.274	119.5	-5.713	889.5	36.448	40.1598
2019-01-14 12:00:00	7.196	120.953	7.804	114.962	7.996	120.033	8.139	116.533	-5.978	889.383	37.232	46.0724
2019-01-14 12:15:00	6.41	118.09	6.878	109.526	7.157	115.7	7.238	111	-5.385	889.817	35.44	40.3488
2019-01-14 12:30:00	6.884	115.55	6.985	104.107	6.925	110.533	7.15	106.467	-5.602	890.083	36.331	42.1402
2019-01-14 12:45:00	6.271	107.207	5.971	99.394	5.852	100.5	5.922	95.867	-5.372	889.533	34.805	35.2008
2019-01-14 13:00:00	7.041	89.2	6.923	86.356	6.348	91.733	6.588	86.867	-5.302	889.417	33.424	31.0383
2019-01-14 13:15:00	5.458	90.3	5.247	83.746	5.263	88.333	5.67	82.4	-4.985	889.9	33.173	21.2417
2019-01-14 13:30:00	5.532	91.967	5.373	84.994	5.244	87.7	5.176	83.167	-4.919	889.8	32.453	13.235
2019-01-14 13:45:00	4.971	78.83	5.049	73.385	5.199	77.8	5.004	75.733	-4.885	889.683	32.949	8.95172
2019-01-14 14:00:00	5.269	74.46	5.176	70.892	5.168	76.5	5.166	73.733	-5.319	889.583	37.792	11.4643
2019-01-14 14:15:00	4.908	61.173	4.691	57.662	4.789	62.533	4.865	64.533	-5.722	889.417	42.048	10.3075
2019-01-14 14:30:00	4.746	84.213	4.931	79.916	4.914	84.033	5.122	81.533	-5.815	889.333	41.653	11.4046
2019-01-14 14:45:00	6.19	95.7	6.12	89.54	5.828	95.567	5.739	93.067	-5.235	889.8	36.464	24.9672
2019-01-14 15:00:00	6.915	88.7	6.604	85.766	6.394	89.433	6.648	84.667	-4.985	889.667	33.36	40.1548
2019-01-14 15:15:00	6.889	94.037	6.488	85.518	6.319	89.267	6.828	85.367	-4.44	890.183	32.843	40.5229
2019-01-14 15:30:00	7.267	79.28	7.672	72.703	7.957	77.033	7.935	74.467	-4.633	889.917	33.008	38.3635
2019-01-14 15:45:00	6.84	78.628	7.123	74.775	7.205	80.567	7.417	75.967	-5.135	889.633	37.008	35.2995
2019-01-14 16:00:00	5.904	89.243	5.67	84.041	5.447	88.367	5.481	83.1	-5.611	889.775	40.741	22.9058
2019-01-14 16:15:00	5.537	82.747	5.468	78.163	5.436	82.7	5.542	79.367	-5.829	889.775	45.28	13.6457
2019-01-14 16:30:00	4.579	81.92	4.746	77.997	4.814	84.567	4.721	81.767	-6.116	889.908	48.832	8.62699
2019-01-14 16:45:00	3.952	89.6	4.043	82.569	3.903	87.967	3.932	82.6	-6.014	889.6	51.147	6.79231
2019-01-14 17:00:00	3.442	89.457	2.96	87.345	2.716	90.967	3.038	84.8	-6.336	889.825	51.157	4.02607
2019-01-14 17:15:00	3.498	91.037	3.306	86.465	3.159	93.7	3.037	87.3	-6.084	889.55	51.829	5.45999
2019-01-14 17:30:00	3.304	77.977	3.318	74.984	3.036	83.767	2.905	84.1	-6.952	890.417	63.467	4.54834
2019-01-14 17:45:00	3.248	86.507	3.018	85.535	2.709	96.5	2.748	96.2	-7.264	889.892	65.781	5.83944
2019-01-14 18:00:00	3.862	74.6	4.419	73.9	4.655	81.967	4.651	80.867	-7.522	890.083	65.227	7.97966
2019-01-14 18:15:00	3.057	75.7	3.8	74.383	3.921	83.2	3.692	82.267	-7.606	890.225	63.52	5.48486
2019-01-14 18:30:00	3.452	76.033	4.284	74.62	4.446	81.267	4.716	78.233	-8.19	889.917	64.96	9.91525
2019-01-14 18:45:00	3.661	71.1	4.132	71.423	4.539	79.167	4.8	79.833	-8.624	890.108	68.629	9.33116
2019-01-14 19:00:00	3.229	68.117	3.527	69.462	3.644	79.567	3.737	82.833	-9.52	889.708	73.035	9.3404
2019-01-14 19:15:00	2.896	82.56	3.8	81.636	3.263	93.133	3.172	96	-9.966	889.825	74.976	12.9558
2019-01-14 19:30:00	2.777	82.667	3.828	83.108	3.322	98.733	3.548	97.8	-10.366	889.758	74.581	15.366
2019-01-14 19:45:00	3.393	72.533	4.424	71.923	4.7	84.067	4.437	85.867	-10.383	889.458	74.624	17.2369
2019-01-14 20:00:00	2.446	64.172	3.951	61.954	4.222	77.033	4.38	79.1	-10.741	889.233	75.211	14.3563
2019-01-14 20:15:00	3.446	68.39	4.255	73.458	3.941	83.833	3.252	89.367	-10.872	890.175	75.2	12.1088
2019-01-14 20:30:00	2.41	62.157	4.136	63.699	4.53	72.7	4.696	75.367	-11.628	889.933	73.515	11.9382
2019-01-14 20:45:00	3.834	69.56	4.715	69.471	4.849	77.6	5.662	75.733	-11.895	889.958	76.32	19.2677
2019-01-14 21:00:00	5.602	81.433	6.737	75.729	7.08	83.367	6.754	82.233	-11.578	890.033	75.381	30.5771
2019-01-14 21:15:00	5.485	85.77	6.129	82.475	5.544	88.633	4.754	91.467	-11.305	890.142	72.437	35.2064
2019-01-14 21:30:00	4.53	90.133	5.442	88.685	3.822	99.633	3.919	95.8	-11.261	889.992	71.936	30.1977
2019-01-14 21:45:00	3.614	95.7	4.775	82.722	4.613	90.133	4.113	88.967	-11.445	890.192	70.347	29.3372
2019-01-14 22:00:00	3.413	91.133	4.658	81.995	4.68	89	4.45	89.167	-11.561	889.558	69.557	31.93
2019-01-14 22:15:00	4.323	88.387	5.919	83.27	5.624	94.833	5.535	93.2	-10.554	889.992	61.771	52.945
2019-01-14 22:30:00	6.12	81.093	7.036	80.275	6.961	85.933	6.696	87.867	-9.52	890.083	52.363	71.5377
2019-01-14 22:45:00	7.627	79.063	8.921	77.716	9.673	84.833	9.214	83.8	-9.008	889.675	50.709	63.4287
2019-01-14 23:00:00	9.599	82.467	11.061	78.376	12.08	85.5	12.257	82.8	-8.841	889.783	48.043	58.4512
2019-01-14 23:15:00	8.801	84.033	10.458	80.152	10.59	88.533	9.906	86.733	-8.674	889.658	48.256	54.7591
2019-01-14 23:30:00	7.767	93.2	8.171	90.629	6.969	95.8	6.92	94.8	-8.574	889.375	48.864	52.0717
2019-01-14 23:45:00	7.162	90.433	8.422	87.879	8.284	90.767	7.897	86.933	-8.924	889.9	48.373	48.1516
2019-01-15 00:00:00	7.474	90.3	8.757	85.407	8.795	89.733	8.478	87.067	-9.158	889.792	49.792	42.8649
2019-01-15 00:15:00	7.694	91.133	9.346	86.926	8.36	96.433	7.53	91.367	-9.191	889.983	51.424	45.7342
2019-01-15 00:30:00	7.094	92.133	7.954	89.695	6.702	96.1	6.666	96.167	-9.158	889.758	51.339	25.4205
2019-01-15 00:45:00	7.503	109.64	9.401	103.608	11.036	107.933	11.728	104.033	-9.474	889.825	51.189	19.2386
2019-01-15 01:00:00	4.796	79.887	6.311	83.084	6.508	92.067	5.27	90.433	-9.899	890.242	52.939	15.2118
2019-01-15 01:15:00	4.833	78.02	6.617	75.203	7.584	82.267	7.839	79.9	-10.928	889.867	56.256	17.0884
2019-01-15 01:30:00	5.641	81.033	7.073	77.64	6.77	87.5	5.96	86.7	-10.399	889.55	57.323	17.0095
2019-01-15 01:45:00	5.1	71.567	5.981	70.937	6.456	79.767	7.091	77.533	-10.483	889.883	57.227	18.3973
2019-01-15 02:00:00	4.427	72.4	5.336	71.856	5.537	80.967	5.965	79.967	-10.316	889.75	56.576	19.2343
2019-01-15 02:15:00	4.201	70.87	5.022	71.269	5.417	81.1	5.914	80.033	-10.834	889.742	56.16	16.4198
2019-01-15 02:30:00	4.993	75.08	5.46	71.314	5.823	79	6.362	77.5	-11.14	889.55	57.717	15.6758
2019-01-15 02:45:00	5.903	90.7	5.57	90.507	4.358	97.633	4.36	91.267	-11.078	889.7	54.955	27.7299
2019-01-15 03:00:00	6.335	95.377	5.686	94.856	5.417	97.8	6.269	95.833	-10.468	889.475	51.989	35.8964
2019-01-15 03:15:00	5.808	99.033	5.619	95.783	5.401	103.8	5.712	100.433	-10.349	890.025	50.485	40.7872
2019-01-15 03:30:00	7.05	91.367	6.679	87.19	5.889	95.067	5.538	92.4	-10.383	890	50.443	36.3817
2019-01-15 03:45:00	7.008	94.293	6.665	91.844	5.592	99.1	5.66	97.467	-10.816	890.058	50.507	48.7562
2019-01-15 04:00:00	7.59	93.26	7.173	89.683	5.804	97.333	5.855	92.967	-10.816	889.75	50.997	64.1976
2019-01-15 04:15:00	7.672	104.103	8.696	102.326	9.36	106.033	9.85	103.633	-10.63	889.725	51.083	63.7037
2019-01-15 04:30:00	7.217	105.047	7.961	100.545	7.521	104	7.808	101.133	-10.666	889.642	51.509	45.5054
2019-01-15 04:45:00	7.409	102.623	7.527	95.722	6.56	102.133	7.598	95.1	-10.855	889.883	52.267	46.3751
2019-01-15 05:00:00	7.695	106.063	9.195	102.01	9.618	106.767	10.144	101.467	-10.76	890.258	52.747	46.2657
2019-01-15 05:15:00	6.17	113.88	7.978	103.437	8.313	107.5	8.785	101.167	-11.074	889.717	54.4	47.3273
2019-01-15 05:30:00	5.856	99.9	6.174	95.582	6.151	100.633	6.404	96.767	-11.461	890.017	54.56	50.7394
2019-01-15 05:45:00	6.044	91.987	6.065	87.581	5.544	95.467	5.684	96.267	-11.674	889.9	54.293	50.0658
2019-01-15 06:00:00	6.638	101.033	6.453	95.807	5.929	100.467	6.175	95.767	-11.428	889.708	54.411	47.8105
2019-01-15 06:15:00	6.615	103.6	6.66	99.697	6.419	102.3	7.042	101.8	-11.495	889.883	53.632	47.8695
2019-01-15 06:30:00	6.442	99.933	6.498	97.126	5.744	100.733	6.84	98.367	-11.578	890.258	53.227	49.6572
2019-01-15 06:45:00	5.976	100.8	6.47	93.423	5.598	98.067	5.614	97.2	-11.511	889.692	51.872	48.5743
2019-01-15 07:00:00	5.95	104.267	6.261	97.472	5.735	100.833	6.178	96.367	-11.511	890.075	50.485	45.5338
2019-01-15 07:15:00	5.666	99.367	5.38	91.636	4.508	99.467	4.685	92.333	-11.295	889.942	49.536	43.6842
2019-01-15 07:30:00	5.053	95.547	5.303	91.311	4.547	98	4.91	90.033	-11.849	889.942	49.749	37.2053
2019-01-15 07:45:00	5.366	92.273	5.769	87.368	5.599	95.8	5.849	90.7	-11.87	889.733	49.259	42.8394
2019-01-15 08:00:00	5.883	92.5	5.86	87.732	5.737	92.933	5.889	89.067	-11.278	890.008	47.232	40.9762
2019-01-15 08:15:00	5.322	87.833	5.669	83.697	5.315	90.967	5.224	87	-11.445	889.342	47.264	39.6951
2019-01-15 08:30:00	5.919	87.167	6.444	83.281	5.995	91	5.516	87.967	-11.378	889.833	47.328	44.0352
2019-01-15 08:45:00	6.222	91.833	6.4	85.272	5.82	93.8	6.197	88.5	-11.261	890.258	46.976	45.6703
2019-01-15 09:00:00	5.862	92.667	6.009	90.178	5.154	98	5.048	92.867	-11.545	889.583	46.965	45.413
2019-01-15 09:15:00	5.748	102.733	6.149	100.092	6.315	103.6	7.453	100.6	-11.511	889.917	46.357	50.6108
2019-01-15 09:30:00	6.022	93.633	5.738	88.906	4.774	97.1	5.189	93.2	-11.161	890.075	45.856	60.0024
2019-01-15 09:45:00	6.392	87.3	6.914	83.111	6.929	87.133	6.929	85.167	-11.478	890.192	46.379	54.3655
2019-01-15 10:00:00	5.275	86.767	5.959	81.735	6.048	87.633	6.222	87.2	-11.378	889.4	46.56	41.0551
2019-01-15 10:15:00	5.657	86.467	5.954	82.556	5.982	87.8	6.859	82.5	-11.511	889.742	45.952	37.238
2019-01-15 10:30:00	6.151	89.913	6.46	82.886	6.069	86.467	6.167	85.467	-11.074	889.642	43.371	32.9802
2019-01-15 10:45:00	7.393	94.507	6.943	90.678	6.361	94.033	6.32	92.567	-10.778	889.525	43.019	44.2328
2019-01-15 11:00:00	7.629	81.357	8.115	77.294	8.27	81.933	8.392	77.767	-10.635	889.733	42.539	62.5789
2019-01-15 11:15:00	8.225	82.133	8.254	78.648	8.394	84.333	8.391	83.133	-10.266	890.267	41.845	58.2359
2019-01-15 11:30:00	8.476	95.713	7.796	90.176	7.11	96.433	7.045	93.367	-9.87	889.95	40.923	69.4295
2019-01-15 11:45:00	10.037	99.267	9.834	96.25	9.567	103.067	9.364	97.267	-9.687	889.933	39.579	74.1071
2019-01-15 12:00:00	9.685	100.84	9.691	96.151	8.448	100.4	8.751	96.367	-9.787	889.733	39.611	77.0375
2019-01-15 12:15:00	8.957	103.5	8.193	99.138	7.956	102.433	8.104	96.533	-9.058	889.867	38.453	77.7978
2019-01-15 12:30:00	9.188	106.867	8.745	98.452	7.832	100.433	7.609	100.267	-8.741	889.517	37.445	78.0984
2019-01-15 12:45:00	9.416	95.733	9.651	90.704	8.672	94.267	8.782	88.433	-8.974	889.467	37.883	79.3092
2019-01-15 13:00:00	9.724	95.467	8.93	92.677	8.499	95.2	8.345	90.267	-8.741	889.1	37.792	79.0541
2019-01-15 13:15:00	9.224	95.267	8.672	91.914	7.442	98.9	7.254	94	-8.658	889.667	38.667	78.7152
2019-01-15 13:30:00	7.691	99.067	6.983	93.788	6.811	100	6.896	95.233	-8.574	889.75	39.072	67.8001
2019-01-15 13:45:00	8.648	100.297	8.242	97.146	7.982	100.633	7.903	97.367	-7.803	889.717	38.325	65.1412
2019-01-15 14:00:00	8.459	101.88	7.738	93.039	7.701	100.233	7.888	96.933	-7.759	889.75	37.84	61.0526
2019-01-15 14:15:00	10.081	90.733	9.416	88.473	8.17	93.433	7.476	88.333	-7.672	889.95	38.085	69.784
2019-01-15 14:30:00	8.491	100.167	8.486	92.921	7.913	99.833	8.042	96.4	-7.722	889.5	37.328	75.8942
2019-01-15 14:45:00	9.614	103.733	9.23	97.031	8.796	101.633	8.135	93.667	-7.556	890.317	36.992	75.1126
2019-01-15 15:00:00	8.742	97.033	8.717	93.029	8.51	97.967	8.882	94.433	-7.589	889.75	36.677	73.69
2019-01-15 15:15:00	9.044	101.317	9.289	95.709	8.857	98.467	8.412	93.5	-7.34	889.95	36.325	74.0418
2019-01-15 15:30:00	8.299	92.96	8.107	87.056	7.837	90.233	8.043	84.967	-7.416	889.65	36.885	69.8388
2019-01-15 15:45:00	8.338	94.933	7.894	89.385	7.469	90.733	7.74	85.867	-7.722	890.1	36.725	63.4252
2019-01-15 16:00:00	7.797	86.828	8.172	82.614	8.266	83.733	7.973	82.7	-7.739	889.767	36.784	55.5315
2019-01-15 16:15:00	6.574	88.47	6.379	83.046	6.051	91.5	5.968	88.2	-7.953	889.667	37.637	51.4457
2019-01-15 16:30:00	8.069	108.917	7.768	101.202	7.312	106	7.455	99.967	-7.739	890.017	37.803	48.5964
2019-01-15 16:45:00	6.87	101.64	6.454	93.905	6.082	100.333	5.762	94.233	-7.916	889.417	38.117	51.0514
2019-01-15 17:00:00	7.867	105.297	7.912	99.714	7.299	102.867	7.279	98.4	-8.01	889.783	38.88	47.1667
2019-01-15 17:15:00	8.959	108.79	8.703	100.607	8.202	104.767	8.078	102.3	-7.649	889.683	38.832	65.6962
2019-01-15 17:30:00	8.135	108.2	8.974	104.597	8.998	110.2	8.773	102.667	-7.689	889.667	38.635	65.8333
2019-01-15 17:45:00	7.695	108.567	7.914	101.966	7.187	103.7	7.13	99.767	-7.556	889.8	38.448	63.9084
2019-01-15 18:00:00	6.588	109.237	6.835	104.16	6.704	109.567	6.454	105.567	-7.936	889.433	39.456	45.9481
2019-01-15 18:15:00	5.848	124.077	6.838	117.609	7.164	122.133	7.502	119.533	-8.331	889.325	42.187	36.6866
2019-01-15 18:30:00	5.588	117.553	6.397	114.18	6.517	119.133	6.71	113.667	-8.584	889.617	44.8	40.2934
2019-01-15 18:45:00	5.093	85.6	5.69	82.794	5.356	92.133	5.255	86.033	-8.724	889.708	49.163	28.9833
2019-01-15 19:00:00	4.619	78.103	5.268	74.123	5.494	80	5.809	75.333	-9.445	889.742	52.011	16.0815
2019-01-15 19:15:00	5.154	73.297	5.881	71.257	6.097	78.333	6.54	75.333	-10.006	889.817	54.176	20.0721
2019-01-15 19:30:00	5.353	80.967	5.963	77.155	6.39	83.767	6.352	79.767	-10.133	890.125	53.387	18.6936
2019-01-15 19:45:00	4.841	81.533	5.746	77.645	5.891	83.7	6.016	81.367	-10.433	889.567	52.373	24.3994
2019-01-15 20:00:00	4.736	92.033	4.665	87.714	3.848	97.033	3.968	93.167	-10.266	889.592	50.923	21.9906
2019-01-15 20:15:00	4.266	81.533	5.355	77.178	5.6	84.6	5.249	82.3	-11.328	889.9	54.304	24.2452
2019-01-15 20:30:00	3.936	71.772	5.091	67.639	5.641	76.4	5.997	75.5	-11.87	889.442	57.472	25.4639
2019-01-15 20:45:00	5.448	77.367	6.242	74.17	6.585	79.6	7.227	75.233	-12.353	889.958	58.955	31.4838
2019-01-15 21:00:00	5.332	77.587	6.193	74.74	6.802	80.167	7.344	75.867	-12.207	889.733	58.347	39.9743
2019-01-15 21:15:00	3.66	87.5	4.686	81.328	5.243	86.6	5.234	81.533	-12.336	889.758	58.88	21.9302
2019-01-15 21:30:00	4.963	88.9	5.253	85.515	4.773	93	4.413	85.633	-12.67	889.675	59.477	18.4904
2019-01-15 21:45:00	3.934	110.5	4.264	97.685	3.411	98.367	3.751	97.1	-12.82	889.742	60.48	21.705
2019-01-15 22:00:00	2.574	101.477	4.341	86.781	4.783	89.567	4.051	88.8	-13.597	889.525	62.368	22.3288
2019-01-15 22:15:00	1.143	111.473	3.168	85.391	3.908	87.767	3.842	87.3	-13.653	889.442	64.725	15.4328
2019-01-15 22:30:00	2.9	97.8	4.077	89.712	3.427	95.667	3.118	94.367	-13.036	890.017	65.685	16.2244
2019-01-15 22:45:00	2.714	99.3	3.805	87.693	3.359	91.767	3.213	88.333	-13.086	889.775	64.981	17.2469
2019-01-15 23:00:00	2.774	111.01	3.94	89.167	3.802	90.567	3.781	87.4	-13.409	889.758	64.011	18.7646
2019-01-15 23:15:00	3.281	109.773	3.952	91.557	3.201	92.4	3.24	90.367	-13.278	890.45	63.84	15.9707
2019-01-15 23:30:00	3.466	93.803	4.022	86.276	3.141	93.433	2.778	89.733	-13.71	889.833	63.413	11.8089
2019-01-15 23:45:00	2.557	90.02	2.602	81.685	2.225	87.2	2.233	82.7	-13.224	890.225	62.229	4.56681
2019-01-16 00:00:00	1.229	179.953	1.728	114.98	2.783	92.667	3.128	80.567	-14.054	889.625	63.328	2.00948
2019-01-16 00:15:00	0.503	208.96	1.35	108.73	2.181	88.4	3.379	80.2	-14.849	889.55	67.477	2.84014
2019-01-16 00:30:00	0.073	191.873	2.107	89.664	2.938	88.533	3.056	82.7	-14.724	889.95	69.675	4.03957
2019-01-16 00:45:00	1.05	141.347	2.898	86.183	3.01	91.467	2.999	88.333	-15.341	889.933	69.547	6.17198
2019-01-16 01:00:00	0.393	220.233	1.713	99.395	2.861	92.833	3.266	87.533	-15.174	890.033	69.621	4.99599
2019-01-16 01:15:00	1.067	216.133	0.157	114.366	2.049	102.3	2.475	91.833	-15.241	890.025	69.376	5.10542
2019-01-16 01:30:00	0	237.4	0.884	86.029	2.866	76.033	3.494	80.433	-15.508	890.342	68.843	5.16085
2019-01-16 01:45:00	0.253	213.067	1.417	87.198	3.019	84.033	3.49	85.2	-15.741	889.992	71.307	8.07204
2019-01-16 02:00:00	0.027	212.4	2.055	95.777	2.242	98.167	2.82	97.3	-15.541	890.083	70.165	8.41169
2019-01-16 02:15:00	0	94.2	2.035	95.94	2.476	97.1	3.194	96.067	-15.591	889.767	71.189	7.834
2019-01-16 02:30:00	0.25	188.033	0.3	126.888	3.372	108.067	3.73	104.033	-15.824	889.442	71.989	4.94981
2019-01-16 02:45:00	1.381	214.693	0.073	126.991	1.815	113.233	2.2	94.067	-15.955	889.525	71.307	2.94956
2019-01-16 03:00:00	2.565	228.167	0.583	191.723	0.68	153.767	2.119	109.8	-15.791	890.083	72	1.46093
2019-01-16 03:15:00	2.687	236.6	0.03	190.169	0.584	131.367	1.814	99.333	-15.691	890.183	70.272	1.12483
2019-01-16 03:30:00	1.699	236.667	0	121.234	0.354	110.867	2.298	100.3	-15.341	890.067	69.536	1.11772
2019-01-16 03:45:00	2.159	240.613	0	121.258	0.43	114.067	1.707	85.433	-16.05	889.792	70.155	1.40621
2019-01-16 04:00:00	2.129	256.2	0	121.265	0.153	82.275	2.235	81.333	-15.274	890.142	69.952	1.61299
2019-01-16 04:15:00	2.125	268.647	0.043	327.036	1.034	55.7	2.46	67.933	-15.237	889.808	68.853	1.97324
2019-01-16 04:30:00	1.281	269.66	1.309	72.98	2.598	63.604	4.307	70.967	-15.966	889.958	64.832	4.28827
2019-01-16 04:45:00	0.027	12.667	3.035	63.796	4.406	74.7	5.355	77.233	-16.781	889.667	71.136	9.30132
2019-01-16 05:00:00	1.859	218.167	0.497	126.89	2.524	88.467	4.751	77.667	-16.848	889.85	73.12	8.60425
2019-01-16 05:15:00	1.523	161.5	2.289	110.458	2.834	102.2	2.726	92.967	-16.798	890.167	72.864	6.90387
2019-01-16 05:30:00	1.897	192.3	2.159	144.52	3.123	119.967	3.878	104.467	-16.178	889.742	73.813	7.60591
2019-01-16 05:45:00	2.746	202.807	2.489	173.06	2.51	153.067	2.917	129.067	-15.934	890.192	73.653	4.73379
2019-01-16 06:00:00	3.57	208.7	3.12	184.567	2.739	161.233	2.987	132.367	-17.193	889.9	68.544	4.149
2019-01-16 06:15:00	2.998	180.007	3.281	136.886	3.783	127.333	4.792	116	-18.427	890.067	72.789	9.22458
2019-01-16 06:30:00	1.891	191.867	2.35	129.61	2.998	117.133	3.356	101.8	-16.798	889.758	74.784	6.09808
2019-01-16 06:45:00	1.736	192.067	1.985	129.838	2.567	114.133	2.773	102.1	-15.874	889.825	73.227	3.95501
2019-01-16 07:00:00	1.15	220.367	0.06	120.504	1.37	105.233	2.019	96.7	-15.291	889.583	72.032	2.79111
2019-01-16 07:15:00	0.981	274.933	0.063	7.851	0.756	68.702	2.468	74.467	-14.828	890.017	70.357	1.71247
2019-01-16 07:30:00	0.09	304.08	1.241	54.282	3.001	78.8	3.399	81.333	-14.828	889.892	68.715	5.37686
2019-01-16 07:45:00	0.393	100.753	1.955	85.324	3.456	83.167	3.46	86.867	-15.258	889.7	68.64	5.76341
2019-01-16 08:00:00	2.172	195.973	1.33	137.117	2.173	115.933	2.219	104.267	-15.867	890.017	69.781	2.18926
2019-01-16 08:15:00	1.378	224.333	0	151.485	0.196	137.167	0.692	104	-15.674	889.675	71.061	0.341072
2019-01-16 08:30:00	1.851	254.487	0	155.464	0	137.05	0.185	107.767	-15.891	890.117	70.517	0.30128
2019-01-16 08:45:00	1.64	270.747	0	189.4	0	137.35	0	149	-15.884	889.958	70.987	0.298438
2019-01-16 09:00:00	1.812	281.4	0	315.501	0.62	7.007	0.05	71.033	-15.691	889.742	69.984	0.30128
2019-01-16 09:15:00	2.343	241.567	0.406	311.762	0	6.9	0.4	56	-15.774	889.483	69.072	0.305544
2019-01-16 09:30:00	2.504	245.72	0.236	279.562	0	4	0	56.1	-16.446	889.95	71.84	0.304123
2019-01-16 09:45:00	2.243	263.42	0.552	271.013	0.083	261.892	1.901	91.1	-15.258	889.792	72.757	0.308386
2019-01-16 10:00:00	2.46	251.373	0	270.926	0.207	82.067	1.681	92.333	-15.358	890.242	70.389	0.315492
2019-01-16 10:15:00	0	227.787	0.627	270.951	1.623	98.567	2.378	98	-14.17	890.067	69.685	0.299859
2019-01-16 10:30:00	0.997	229.4	0	58.138	1.073	92.867	2.041	97	-12.936	889.558	63.925	0.245856
2019-01-16 10:45:00	2.372	262.033	1.347	276.722	0	299.042	0	97.192	-12.286	889.867	61.984	0.210328
2019-01-16 11:00:00	2.1	290.867	1.992	290.946	1.394	317.7	0	84.175	-12.786	889.942	61.749	0.189011
2019-01-16 11:15:00	1.71	286.067	1.539	285.842	1.141	289.2	0.727	286.9	-12.486	889.608	59.648	0.260067
2019-01-16 11:30:00	2.41	227.8	1.92	193.726	2.342	162.192	2.293	133.933	-11.561	889.967	57.205	0.318334
2019-01-16 11:45:00	1.879	99.433	1.787	95.031	2.091	100.467	2.537	96.533	-11.078	889.475	55.776	0.215302
2019-01-16 12:00:00	2.686	76.6	2.689	75.109	2.823	83.4	2.934	83.467	-10.483	889.95	54.048	1.17812
2019-01-16 12:15:00	3.432	92.167	3.59	89.523	3.365	91.433	3.341	89.967	-10.333	889.642	54.635	3.50167
2019-01-16 12:30:00	3.836	71.067	3.911	68.058	4.052	75.667	4.152	72.433	-10.416	890.158	54.379	1.89366
2019-01-16 12:45:00	2.266	64.6	2.511	64.432	2.733	73.033	2.822	66.633	-10.483	889.417	54.752	0.306965
2019-01-16 13:00:00	2.415	86.807	2.63	79.802	2.872	79.2	3.17	74.233	-9.441	889.833	51.755	0.145666
2019-01-16 13:15:00	2.872	41.692	2.67	47.041	3.018	58.667	2.795	56.767	-9.124	889.958	49.28	0.173378
2019-01-16 13:30:00	3.544	71.107	3.763	63.674	3.938	68.367	3.654	62.867	-9.074	889.65	46.571	1.9235
2019-01-16 13:45:00	3.998	55.02	3.706	50.345	3.995	56.4	4.316	52.567	-9.445	889.675	43.776	6.37876
2019-01-16 14:00:00	4.067	64.393	3.737	58.956	3.986	63.9	3.91	57.367	-9.124	890.125	43.637	5.35483
2019-01-16 14:15:00	2.958	41.291	3.069	36.99	3.277	42.167	3.199	31.2	-8.724	889.842	43.851	4.4382
2019-01-16 14:30:00	2.679	56.607	2.799	55.075	3.162	64.133	3.481	66.2	-8.05	889.842	44.213	4.67766
2019-01-16 14:45:00	3.548	79.113	3.507	71.645	3.833	75.833	4.205	70.967	-7.539	890.075	45.077	4.55544
2019-01-16 15:00:00	4.555	76.057	4.712	69.622	4.77	75.767	4.723	71.6	-7.739	889.8	44.896	4.22858
2019-01-16 15:15:00	3.943	74.893	3.769	73.673	4.02	78	4.075	73.533	-7.706	890.092	44.907	4.09997
2019-01-16 15:30:00	3.116	70.078	3.226	69.535	3.406	76.7	3.515	73.267	-7.589	889.767	44.331	0.862628
2019-01-16 15:45:00	2.846	94.757	2.74	85.705	2.858	91.567	2.803	89.2	-7.249	890.075	44.565	0.918763
2019-01-16 16:00:00	1.962	65.123	2.039	56.622	2.098	57.067	2.522	55.567	-7.21	890.092	43.317	0.350309
2019-01-16 16:15:00	1.94	21.532	1.649	22.774	1.932	33.9	1.874	42.4	-7.091	889.825	43.669	0.258646
2019-01-16 16:30:00	2.421	69.043	2.43	62.663	2.779	67.967	2.943	64.667	-7.26	889.867	44.651	0.262199
2019-01-16 16:45:00	3.683	82.192	3.561	79.06	3.491	84.6	3.559	80.467	-7.436	889.617	45.216	1.73236
2019-01-16 17:00:00	3.137	83.967	3.287	76.05	3.358	80.833	3.34	77.9	-7.772	889.825	45.877	2.93393
2019-01-16 17:15:00	2.954	81.952	2.714	79.61	2.956	81.733	3.014	79.633	-7.472	890.2	45.312	2.21413
2019-01-16 17:30:00	2.777	78.723	2.845	71.793	2.882	76.1	2.974	72.433	-7.656	889.892	45.707	1.1767
2019-01-16 17:45:00	5.119	36.894	5.014	35.127	5.087	41.9	4.813	41.333	-8.534	890.117	48.683	2.78258
2019-01-16 18:00:00	3.302	42.1	3.297	39.666	3.115	49	2.697	44.967	-9.074	890.092	52.437	2.25036
2019-01-16 18:15:00	3.97	39.278	4.002	35.202	4.17	41.167	4.136	39.767	-9.516	890.025	55.435	2.09262
2019-01-16 18:30:00	2.256	41.63	2.327	39.065	2.508	45.067	2.354	43.867	-9.828	889.833	56.811	0.660116
2019-01-16 18:45:00	1.456	50.467	1.204	42.974	1.63	51.7	1.706	52.933	-10.449	889.842	57.472	0.343914
2019-01-16 19:00:00	0.707	55	0	56.132	0.027	58	0.417	63.067	-10.183	890.217	57.803	0.250119
2019-01-16 19:15:00	0	54.768	0	56.119	0	57.867	0	63.067	-10.63	890.117	57.835	0.16272
2019-01-16 19:30:00	0	55	0	56.158	0	58.1	0	63	-10.399	889.667	58.4	0.139981
2019-01-16 19:45:00	0.133	55.05	0	56.436	0.186	64.333	0.537	65.233	-10.703	890.208	58.656	0.223828
2019-01-16 20:00:00	1.109	155.533	1.113	142.267	1.607	175	1.966	163.9	-10.383	889.808	57.771	0.30128
2019-01-16 20:15:00	1.98	178.7	2.516	167.398	2.895	177.933	3.324	173.167	-10.383	890.133	56.757	0.327571
2019-01-16 20:30:00	0.964	201.933	1.772	188.43	2.772	191.8	3.233	183	-10.283	889.933	55.68	0.179773
2019-01-16 20:45:00	0.057	179.847	1.274	186.447	1.907	173.133	1.824	160.9	-9.995	890.025	54.891	0.311939
2019-01-16 21:00:00	0	153.833	0	165.619	0.027	170.9	0.104	158	-10.016	889.758	54.72	0.324018
2019-01-16 21:15:00	1.327	35.02	0	165.564	0	171.033	0	157.9	-10.058	889.942	55.552	0.298438
2019-01-16 21:30:00	0.426	35	0	89.88	0	171.033	0	158	-10.266	890.008	56.373	0.213881
2019-01-16 21:45:00	0	35.07	0	90.257	0	171	0	158	-10.712	889.875	57.824	0.268594
2019-01-16 22:00:00	1.27	309.56	0	89.931	0	171.317	0	158	-10.541	889.292	59.083	0.298438
2019-01-16 22:15:00	1.748	227.4	0.613	157.031	0.463	171	0.359	158	-10.874	890	59.125	0.298438
2019-01-16 22:30:00	1.884	227.133	0.829	210.36	0.636	196.033	0	161	-10.449	889.65	59.008	0.298438
2019-01-16 22:45:00	2.712	269.267	2.611	276.212	2.022	282.933	1.482	245.5	-10.316	889.892	57.76	0.304123
2019-01-16 23:00:00	2.761	275.04	2.144	291.302	1.819	298.3	2.11	306.967	-9.62	889.85	55.019	0.32544
2019-01-16 23:15:00	1.948	264.88	0.578	293.578	1.23	298.333	1.94	334.967	-10.02	889.975	54	0.309807
2019-01-16 23:30:00	2.184	265.767	1.827	301.807	1.72	318.5	1.27	327.133	-10.083	888.908	54.165	0.311228
2019-01-16 23:45:00	2.875	238.813	1.773	277.282	0.753	311.733	0	326.4	-9.891	889.992	54.085	0.298438
2019-01-17 00:00:00	3.939	229.667	2.054	243.533	1.898	253.633	0.833	282.033	-10.299	890.058	54.229	0.30128
2019-01-17 00:15:00	2.27	217.627	2.885	231.456	2.143	247.033	1.649	254.333	-11.307	889.775	54.976	0.299859
2019-01-17 00:30:00	4.383	221.447	3.629	224.801	2.836	234.867	1.66	254	-11.076	890.158	57.493	0.30128
2019-01-17 00:45:00	3.907	228.433	3.629	228.903	2.583	230	1.673	231	-10.61	889.992	57.781	0.304123
2019-01-17 01:00:00	3.531	231.267	4.87	235.557	4.236	244.6	3.37	236.433	-10.466	889.658	57.515	0.554242
2019-01-17 01:15:00	2.083	233.833	2.76	241.792	2.74	262.067	2.462	254.117	-10.183	889.825	57.067	0.431314
2019-01-17 01:30:00	1.457	249.693	1.634	272.752	1.749	271	1.92	262.983	-9.974	889.867	57.205	0.310518
2019-01-17 01:45:00	2.29	265.173	2.97	288.672	2.811	304.567	2.878	297.767	-9.62	889.692	56.373	0.17551
2019-01-17 02:00:00	2.362	265.733	2.367	296.894	2.221	304.333	2.532	302.5	-9.808	889.917	56.779	0.260778
2019-01-17 02:15:00	3.075	254.107	3.181	278.16	3.112	297.3	3.249	294.2	-9.274	889.692	56.725	0.179773
2019-01-17 02:30:00	2.69	254.333	2.936	268.88	2.972	283.933	3.203	286.133	-9.224	889.85	57.557	0.12506
2019-01-17 02:45:00	2.554	253.867	3.118	271.335	3.296	281.133	3.241	278.5	-9.291	889.983	58.357	0.297017
2019-01-17 03:00:00	3.458	249.9	3.377	262.258	3.39	267.867	3.253	263.767	-9.224	890.058	58.869	0.687829
2019-01-17 03:15:00	3.706	250.233	4.113	257.439	4.036	264	3.98	260.267	-9.291	889.95	60.304	3.87401
2019-01-17 03:30:00	3.121	243.333	4.153	252.564	4.057	258.667	3.812	257.683	-9.158	889.625	61.632	5.84228
2019-01-17 03:45:00	2.82	242.133	4.03	245.614	4.004	253.433	3.821	249	-9.208	889.725	63.136	5.31504
2019-01-17 04:00:00	2.488	242.267	3.44	247.041	3.316	256	3.252	250.5	-9.124	890.1	63.392	4.59452
2019-01-17 04:15:00	2.892	245.767	3.661	247.407	3.465	255.033	3.412	251.633	-9.058	889.642	63.701	5.89202
2019-01-17 04:30:00	2.444	257.84	3.93	269.292	4.014	277.967	4.244	277.167	-8.741	890.242	63.723	7.17388
2019-01-17 04:45:00	3.811	269.007	4.692	283.752	4.832	288.4	5.136	284.333	-8.791	889.542	63.643	5.83375
2019-01-17 05:00:00	3.923	290.8	5.164	295.315	5.434	300.2	5.698	294.767	-9.008	890.133	63.664	7.84323
2019-01-17 05:15:00	4.424	282.6	6.105	288.684	6.509	295.367	6.834	292.733	-9.358	889.708	64.443	13.5434
2019-01-17 05:30:00	3.556	283.933	4.845	291.272	5.14	297.3	5.57	294.267	-8.908	889.883	62.523	10.8617
2019-01-17 05:45:00	3.259	246.173	3.127	282.338	3.213	289.6	3.395	284.2	-9.641	889.742	64.576	3.39154
2019-01-17 06:00:00	4.436	237.533	4.261	244.781	3.844	259.6	3.696	264.733	-9.704	889.842	65.696	2.90622
2019-01-17 06:15:00	4.465	245.687	4.351	251.013	4.148	260.533	4.239	264.9	-9.483	890.008	65.333	4.99599
2019-01-17 06:30:00	4.416	244.6	3.999	249.616	3.863	260.667	3.965	264.533	-9.174	890.125	64.32	6.1258
2019-01-17 06:45:00	4.526	239.267	4.113	242.508	3.862	252.267	3.719	254.067	-8.658	889.717	63.243	5.57724
2019-01-17 07:00:00	4.116	239	3.798	243.457	3.587	251.733	3.516	251.133	-8.658	889.683	62.336	5.10187
2019-01-17 07:15:00	3.172	231.46	3.234	240.079	2.867	248.533	2.704	255	-8.411	889.667	61.984	3.221
2019-01-17 07:30:00	1.976	231.9	2.547	241.486	2.313	252.067	2.125	254.833	-8.674	889.717	62.581	0.780202
2019-01-17 07:45:00	2.883	227.34	2.927	231.86	2.803	240	2.566	236.4	-8.654	889.767	63.221	0.581243
2019-01-17 08:00:00	2.504	231.873	2.368	243.508	2.412	252	2.451	247	-8.187	889.933	62.304	0.302701
2019-01-17 08:15:00	1.461	255.86	1.649	279.487	1.721	279.333	1.752	270.867	-8.574	890.083	62.629	0.133587
2019-01-17 08:30:00	1.948	293.867	2.474	307.486	2.294	314.2	2.156	296	-8.24	889.75	61.744	0.235908
2019-01-17 08:45:00	1.99	298.267	2.232	306.526	2.035	310.1	1.969	295.133	-8.574	889.767	62.101	0.299859
2019-01-17 09:00:00	2.315	288.6	2.36	297.004	2.205	298.433	2.106	282.967	-8.641	890.333	62.464	0.333966
2019-01-17 09:15:00	2.358	261.673	2.39	285.387	2.12	268.667	2.001	254.233	-8.674	889.858	61.536	0.309807
2019-01-17 09:30:00	1.418	220.733	1.148	270.394	1.917	233.7	2.02	231	-8.891	889.858	62.704	0.316913
2019-01-17 09:45:00	2.194	212.4	2.291	217.47	1.981	222.9	1.989	221.667	-9.258	889.983	62.432	0.211038
2019-01-17 10:00:00	2.732	230.267	3.948	248.452	3.726	255.7	3.289	248.033	-8.791	889.683	62.592	1.19588
2019-01-17 10:15:00	2.168	232.433	3.198	251.046	3.211	261.8	2.832	255.017	-8.424	890.05	61.525	1.55756
2019-01-17 10:30:00	3.341	221.4	2.817	241.983	2.945	249.1	2.816	244.033	-7.289	890.067	58.091	1.32165
2019-01-17 10:45:00	2.542	229.133	3.415	234.088	3.076	238.233	2.881	233	-6.545	889.908	55.787	2.20844
2019-01-17 11:00:00	2.687	231.933	3.821	236.19	4.143	240.967	4.273	234.167	-5.898	889.683	52.896	4.2634
2019-01-17 11:15:00	3.26	234.687	4.552	230.572	5.012	234.433	5.157	229.367	-4.712	889.717	49.088	7.87166
2019-01-17 11:30:00	3.517	236.533	4.22	233.423	4.961	239.433	5.362	235.433	-3.538	889.708	45.739	12.1542
2019-01-17 11:45:00	4.251	243.52	4.824	240.092	5.411	243.6	5.635	237.8	-2.217	889.617	42.443	12.0967
2019-01-17 12:00:00	4.63	243.593	5.187	241.048	5.382	245.733	5.564	242.617	-1.82	890.05	40.192	18.1045
2019-01-17 12:15:00	3.726	264.4	3.883	264.779	3.996	267.367	3.954	261.767	-0.842	889.45	39.053	13.5647
2019-01-17 12:30:00	3.949	321.56	4.152	312.545	4.367	312.6	4.534	304.167	-1.559	889.367	39.525	7.39203
2019-01-17 12:45:00	4.883	303.347	5.553	291.58	6.188	290.533	7.266	280.367	-1.845	889.7	40.117	15.5564
2019-01-17 13:00:00	9.353	263.227	10.108	265.524	10.164	270.567	10.112	267.033	-0.02	889.833	35.197	40.4511
2019-01-17 13:15:00	7.984	268.14	8.568	269.117	8.798	274.367	8.891	268.617	-0.192	890.333	35.171	51.9673
2019-01-17 13:30:00	9.607	271.453	10.436	274.666	10.368	278.967	10.446	274.4	0.017	889.883	36.443	39.45
2019-01-17 13:45:00	8.423	267.34	9.148	268.027	9.151	273.65	9.061	270.083	0.083	889.733	37.104	36.3661
2019-01-17 14:00:00	8.445	270.813	8.986	271.492	9.225	274.933	9.163	270.367	0.548	889.85	39.277	36.2552
2019-01-17 14:15:00	7.815	264.007	8.254	263.509	8.466	267.967	8.437	263.95	0.515	889.792	40.584	34.5698
2019-01-17 14:30:00	6.76	286.92	7.06	283.447	7.15	285.733	7.249	280.767	0.349	889.275	40.899	35.4445
2019-01-17 14:45:00	7.566	286.067	7.911	286.963	8.058	291.733	8.266	287.033	0.565	890.2	42.912	34.6415
2019-01-17 15:00:00	7.635	275.367	8.428	278.212	8.668	282.6	8.746	280.633	0.765	889.542	46.128	35.6989
2019-01-17 15:15:00	7.997	280.1	8.532	279.372	8.737	284.167	8.983	278.667	0.598	890.017	48.16	39.0556
2019-01-17 15:30:00	10.416	275.787	10.773	275.486	11.079	278.9	11.432	275.167	0.515	889.533	50.608	42.2901
2019-01-17 15:45:00	10.5	269.313	11.459	268.855	11.751	273.767	11.822	269.933	0.615	890.475	52.443	42.6731
2019-01-17 16:00:00	9.924	268.94	10.749	273.253	10.937	278.7	11.085	275.333	0.548	889.483	53.675	42.7605
2019-01-17 16:15:00	9.261	267.067	9.893	267.966	10.063	273.033	10.003	266.717	0.549	889.858	53.099	43.5172
2019-01-17 16:30:00	10.644	265.78	11.598	266.782	11.653	271.467	11.347	266.7	0.832	890.142	53.429	51.2112
2019-01-17 16:45:00	10.645	264.693	11.747	266.898	11.838	271.7	12.04	269.167	0.166	889.65	56.059	63.1438
2019-01-17 17:00:00	9.229	272.48	10.122	269.82	10.544	275.067	10.818	271.167	0.349	889.75	56.133	74.9413
2019-01-17 17:15:00	8.452	269.373	9.596	271.211	9.597	275	9.488	272.167	0.266	889.542	55.685	66.4344
2019-01-17 17:30:00	6.148	271.007	6.716	270.149	6.87	273.467	6.893	268.567	-0.083	889.883	56.949	43.0106
2019-01-17 17:45:00	5.544	267.933	6.133	268.419	6.556	272.5	6.802	266.933	-0.116	889.917	57.717	28.6799
2019-01-17 18:00:00	5.156	274.933	6.002	273.003	6.492	277.167	6.496	272.9	-0.256	889.658	59.232	27.0626
2019-01-17 18:15:00	4.463	267.333	5.365	261.776	5.873	264.333	5.864	260.567	-0.592	890.125	60.603	21.4385
2019-01-17 18:30:00	5.913	277.473	6.932	274.657	7.118	279.933	7.401	275.667	-0.498	890.008	63.184	26.7528
2019-01-17 18:45:00	4.343	275.987	5.432	272.35	5.84	277.533	6.391	272.267	-1.389	889.708	65.221	22.412
2019-01-17 19:00:00	4.211	277.52	4.835	274.367	5.274	279.9	5.564	274.9	-1.256	889.833	67.296	20.1275
2019-01-17 19:15:00	3.103	295.293	3.566	287.302	3.79	288.3	4.137	280.5	-1.559	889.958	68.533	15.4165
2019-01-17 19:30:00	2.71	289.84	3.423	283.926	3.703	281.933	4.17	272.8	-2.131	890.017	69.333	13.0361
2019-01-17 19:45:00	4.497	252.253	6.148	245.754	7.397	247.633	7.941	241	-2.902	889.85	69.765	15.0917
2019-01-17 20:00:00	7.26	237.58	8.782	234.368	9.696	240.067	10.043	235.867	-2.246	889.575	66.933	26.9703
2019-01-17 20:15:00	4.846	246.08	6.669	240.987	7.716	245.45	7.925	240.75	-2.177	889.575	65.387	26.1666
2019-01-17 20:30:00	3.04	306.267	3.667	340.785	3.773	324.633	3.903	318.5	-3.956	890.025	73.616	11.5069
2019-01-17 20:45:00	2.127	319.587	2.6	310.079	2.67	305.2	3.095	291.433	-4.384	889.308	79.179	1.81763
2019-01-17 21:00:00	1.331	282.773	0.83	287.656	1.637	268.067	2.492	266.667	-4.265	889.983	80.725	0.633826
2019-01-17 21:15:00	1.919	239.233	2.352	241.979	3.124	243.3	3.985	238.767	-4.735	889.625	81.664	2.31645
2019-01-17 21:30:00	2.258	255.847	3.863	242.796	5.095	245.417	5.549	240.5	-4.919	889.892	81.6	4.67553
2019-01-17 21:45:00	1.877	245.453	2.16	246.38	2.347	245.033	2.52	237.967	-4.785	889.617	78.731	6.10803
2019-01-17 22:00:00	3.172	335.093	2.768	313.69	3.062	288.467	4.07	255.65	-4.13	889.467	76.672	10.2208
2019-01-17 22:15:00	1.413	290.333	1.795	267.793	2.154	254.15	2.496	238.717	-5.035	889.792	80.213	5.36123
2019-01-17 22:30:00	2.833	231.007	3.33	236.638	3.865	244.9	4.411	242.167	-4.902	889.392	78.88	2.91119
2019-01-17 22:45:00	1.863	311.667	2.228	275.154	3.048	261.15	3.474	237.733	-5.069	889.967	75.435	3.15207
2019-01-17 23:00:00	1.623	341.427	2.482	340.695	2.183	277.533	2.198	284.6	-5.971	889.808	78.907	2.23544
2019-01-17 23:15:00	2.169	329.067	1.916	343.17	1.937	320.6	2.273	295.133	-6.662	889.588	82.027	0.193274
2019-01-17 23:30:00	2.318	318.48	1.556	299.583	2.058	286.133	2.419	265.9	-6.017	889.417	83.125	0.312649
2019-01-17 23:45:00	2.281	328.947	0.873	303.861	1.367	272.6	2.156	260	-5.472	890.158	82.155	0.274279
2019-01-18 00:00:00	1.084	288.227	0.146	316.888	0	272	1.155	260	-5.839	889.783	82.304	0.207485
2019-01-18 00:15:00	1.202	224.24	1.417	228.654	2.979	235.567	3.926	231.1	-6.067	890.092	83.2	1.80271
2019-01-18 00:30:00	2.182	219.467	2.932	222.977	3.58	231.5	3.922	231.4	-6.278	889.888	83.648	2.90409
2019-01-18 00:45:00	0.45	348.667	0.53	316.006	1.275	279.5	2.182	260.983	-5.997	890.125	81.691	2.66889
2019-01-18 01:00:00	0.08	285.933	1.713	289.264	2.361	286.1	2.867	274.3	-5.783	889.642	79.547	0.693513
2019-01-18 01:15:00	2.358	241.828	2.605	269.786	2.959	264.45	3.646	251.95	-6.78	890.083	82.88	0.937948
2019-01-18 01:30:00	2.64	300.693	3.101	270.647	4.943	263	5.647	256.167	-6.883	890.121	83.531	4.56894
2019-01-18 01:45:00	3.222	295.96	2.671	271.988	4.273	261.067	4.672	251.8	-7.032	889.775	78.096	5.37331
2019-01-18 02:00:00	1.747	241.08	4.408	241.478	4.526	250.4	4.238	245.633	-7.749	889.883	77.877	5.22053
2019-01-18 02:15:00	2.221	272.507	3.81	249.504	4.875	251.883	4.584	244.85	-8.758	890.075	81.131	4.67198
2019-01-18 02:30:00	3.22	267.147	4.724	252.934	4.511	258.7	4.018	256.4	-8.07	889.825	81.835	3.50452
2019-01-18 02:45:00	4.169	235.593	4.828	234.797	4.392	251.667	3.816	257.9	-8.311	889.992	79.872	2.06349
2019-01-18 03:00:00	3.997	226.167	5.686	211.325	5.273	217.933	4.746	218.433	-8.791	889.967	79.125	2.01446
2019-01-18 03:15:00	1.816	223.46	4.782	219.702	4.309	215.1	4.036	203.167	-10.522	890	76.805	1.01114
2019-01-18 03:30:00	0.992	273.1	1.825	243	3.177	229.3	3.564	206.467	-10.399	890.079	81.248	0.292043
2019-01-18 03:45:00	1.939	256.253	2.554	224.046	3.666	220.917	3.274	219.267	-8.974	889.733	81.323	0.172668
2019-01-18 04:00:00	2.742	215.567	3.413	203.712	2.8	212	2.714	205.133	-9.308	889.808	80.459	0.240882
2019-01-18 04:15:00	4.903	217.967	3.88	207.14	3.184	205.2	3.196	194	-6.362	889.608	78.645	0.228092
2019-01-18 04:30:00	4.416	223.693	4.082	202.613	3.515	199.6	2.96	191.9	-6.972	889.517	72.512	0.282805
2019-01-18 04:45:00	4.489	204.2	4.825	197.516	4.053	200	3.384	186	-6.645	889.783	73.44	0.21388
2019-01-18 05:00:00	4.814	200.413	5.834	196.729	5.502	195.267	4.559	188.067	-7.649	889.625	72.395	0.335388
2019-01-18 05:15:00	1.01	136.98	2.558	159.564	3.404	189.3	4.474	191.467	-9.833	889.442	73.771	0.154193
2019-01-18 05:30:00	0	109.867	0.404	151.805	1.347	173.2	2.471	177.567	-9.378	890.458	77.728	0.256515
2019-01-18 05:45:00	0.609	262.627	0.173	148.76	0.515	128.867	1.535	131.8	-8.891	889.892	80.309	0.306965
2019-01-18 06:00:00	1.064	256.04	0	149.432	0.053	97.025	1.449	128	-8.604	889.633	78.731	0.321176
2019-01-18 06:15:00	0	133.507	1.279	96.159	1.773	86.033	1.849	96	-8.07	889.933	80.117	0.301991
2019-01-18 06:30:00	0	137.6	1.196	94.298	2.63	91.767	2.951	94.067	-7.506	889.817	79.648	0.237329
2019-01-18 06:45:00	0	182.113	0.918	110.509	2.384	99.667	3.082	96.1	-8.25	889.696	81.685	0.32615
2019-01-18 07:00:00	0	182.673	1.476	83.315	2.884	88.133	3.271	89	-7.97	889.654	84.245	0.174799
2019-01-18 07:15:00	0	182.413	0.72	74.249	2.664	87.067	2.596	83.033	-8.684	890.446	86.507	0.436998
2019-01-18 07:30:00	0.216	264.36	0	85.228	1.165	89.883	2.234	80.367	-8.691	890.062	87.317	0.315492
2019-01-18 07:45:00	0	252.267	1.388	92.909	1.766	96	2.148	80.2	-8.758	889.829	87.275	0.318334
2019-01-18 08:00:00	0.429	228.2	0.705	99.869	1.254	96	1.166	80.333	-8.641	890.579	88.469	0.302701
2019-01-18 08:15:00	2.315	229.667	0.083	117.259	0.392	109	0.275	80.3	-8.674	889.658	88.661	0.30128
2019-01-18 08:30:00	1.148	221.28	0.053	116.516	1.685	84.8	1.873	80.167	-8.25	890.475	88.341	0.304123
2019-01-18 08:45:00	1.044	220.873	0.064	116.251	1.636	92	2.504	80	-7.903	890.388	88.683	0.31407
2019-01-18 09:00:00	0	231.547	0.383	105.639	1.889	91.833	2.947	80	-7.95	889.525	88.597	0.211749
2019-01-18 09:15:00	0.03	231.407	0	100.27	1.317	92	2.489	80	-8.571	889.142	88.725	0.243014
2019-01-18 09:30:00	0.06	231.4	0.317	100.242	1.843	92.167	2.754	80	-8.541	890.129	88.853	0.220986
2019-01-18 09:45:00	0.879	219.533	0.51	124.259	2.249	106	2.375	80	-7.522	890.05	88.875	0.289911
2019-01-18 10:00:00	0.504	185.333	1.263	118.841	2.279	110.767	3.213	96.867	-6.628	889.588	86.123	0.736858
2019-01-18 10:15:00	0.307	133.513	1.784	107.66	2.275	99.367	2.696	96.333	-7.032	889.746	82.837	0.716962
2019-01-18 10:30:00	0.77	123.833	2.174	94.408	2.614	92.6	2.758	90	-7.289	890.079	82.389	0.291332
2019-01-18 10:45:00	1.366	144.607	2.578	112.306	2.503	109.367	2.734	90.433	-7.012	889.992	81.205	0.054003
2019-01-18 11:00:00	0.343	139.76	1.332	101.399	2.231	99.033	2.274	92	-6.269	890.008	80.224	0.20109
2019-01-18 11:15:00	2.295	96.6	2.308	90.594	2.422	95.433	2.648	91.067	-5.402	890.2	79.797	0.194695
2019-01-18 11:30:00	2.768	96.1	2.905	92.711	2.824	96.767	3.094	93.967	-5.285	890.017	76.053	0.189721
2019-01-18 11:45:00	3.462	110	3.42	106.28	3.324	109.833	3.374	106.267	-5.469	889.9	69.429	0.189011
2019-01-18 12:00:00	2.768	96.3	2.777	92.027	2.714	95.4	2.983	91.933	-5.169	889.742	71.829	0.167694
2019-01-18 12:15:00	2.891	113.133	3.088	105.267	3.039	109.8	3.15	103.533	-4.935	889.567	74.101	0.252962
2019-01-18 12:30:00	2.739	111.087	2.851	100.928	2.941	105.2	3.162	99.9	-4.5	889.692	71.904	0.552821
2019-01-18 12:45:00	2.825	104.013	2.905	103.38	2.936	110.3	3.21	103.5	-4.285	890.3	69.696	0.439841
2019-01-18 13:00:00	2.508	110.033	2.815	103.418	3.086	111.667	3.216	104.533	-3.874	890.342	67.957	0.91521
2019-01-18 13:15:00	2.567	99.503	2.405	95.769	2.306	100.9	2.549	98.333	-3.994	889.742	67.605	0.893182
2019-01-18 13:30:00	2.681	108.467	2.699	104.858	2.637	110.433	2.86	107.1	-3.673	889.967	66.315	0.581954
2019-01-18 13:45:00	2.86	89.167	2.916	83.516	2.952	87.367	3.062	84.467	-3.672	889.875	65.888	0.866891
2019-01-18 14:00:00	2.783	71.768	2.872	68.566	2.799	79.033	2.778	78.667	-3.006	889.758	65.109	0.797256
2019-01-18 14:15:00	2.667	68.9	2.634	62.916	2.601	69.067	2.94	66.933	-3.421	890.008	66.123	0.655142
2019-01-18 14:30:00	3.131	75.3	3.199	72.317	3.217	79.333	3.334	73.233	-3.321	890.1	64.779	0.908104
2019-01-18 14:45:00	2.693	79.867	2.791	69.918	2.909	81.267	3.216	79.733	-3.354	889.675	65.973	1.04027
2019-01-18 15:00:00	3.405	74.567	3.262	67.803	3.395	74.567	3.441	72.133	-3.271	889.833	64.864	1.81976
2019-01-18 15:15:00	3.068	75.933	2.89	70.361	2.674	81.1	3.279	72.733	-3.471	889.8	64.725	2.25818
2019-01-18 15:30:00	2.932	76.933	3.116	73.995	3.379	77.733	3.519	73.8	-3.354	889.933	63.403	2.03151
2019-01-18 15:45:00	3.71	50.033	3.857	45.371	3.882	50	4.101	48.767	-3.706	889.85	63.285	2.40953
2019-01-18 16:00:00	3.712	66.267	3.614	60.127	3.695	64.133	3.922	63	-3.421	890.283	63.157	2.61204
2019-01-18 16:15:00	3.196	72.667	3.187	69.144	3.424	76.2	3.571	70.5	-3.773	889.575	64.171	2.25676
2019-01-18 16:30:00	3.219	76.1	2.997	72.042	3.225	79.133	3.499	75.4	-3.857	889.967	65.408	2.31858
2019-01-18 16:45:00	3.409	71.877	3.38	69.178	3.409	76.433	3.555	73.4	-3.899	889.783	66.677	2.37542
2019-01-18 17:00:00	3.453	70.213	3.612	66.302	3.587	72.633	3.524	69.2	-4.255	889.817	67.573	2.34345
2019-01-18 17:15:00	3.573	70.882	3.533	67.696	3.567	75.1	3.71	73.1	-4.305	889.992	69.312	2.81811
2019-01-18 17:30:00	3.086	92.16	2.72	88.15	2.684	92.167	2.941	81.2	-4.662	889.542	70.688	2.78542
2019-01-18 17:45:00	3.058	86.7	3.128	78.886	2.864	87.2	2.947	83.733	-4.819	889.792	70.56	1.90077
2019-01-18 18:00:00	3.237	79.4	3.233	73.833	3.224	80	3.364	75.667	-4.902	889.958	69.643	0.980582
2019-01-18 18:15:00	2.656	76.3	2.661	72.679	2.739	79.467	2.82	75.467	-5.402	890.075	69.643	0.279253
2019-01-18 18:30:00	2.016	64.94	2.06	64.182	2.198	71.733	2.277	70.133	-5.521	890.2	70.517	0.328282
2019-01-18 18:45:00	1.878	77.283	2.119	72.555	2.195	86.033	2.249	72.4	-5.898	890.092	70.709	0.316913
2019-01-18 19:00:00	2.032	78.15	2.054	75.267	2.097	85.233	2.249	73.4	-5.898	889.7	71.68	0.28849
2019-01-18 19:15:00	2.063	92.173	2.521	75.333	2.536	86	2.502	78	-6.087	890.042	71.029	0.304123
2019-01-18 19:30:00	2.151	93.753	2.613	80.704	2.647	92.1	2.774	88.3	-6.366	889.575	71.68	0.167694
2019-01-18 19:45:00	2.053	99.567	2.654	85.254	2.683	94	2.927	95.8	-6.562	889.733	72.128	0.118665
2019-01-18 20:00:00	1.903	100.2	2.792	85.271	2.683	94.267	2.984	95.867	-6.545	890.075	72.64	0.391522
2019-01-18 20:15:00	1.147	100.227	1.916	84.789	2.378	91.633	2.553	93.267	-6.703	890.075	73.109	0.210328
2019-01-18 20:30:00	0	100.257	1.882	75.282	2.231	80.467	2.31	73.867	-7.032	889.717	73.301	0.186168
2019-01-18 20:45:00	0.363	80.388	1.597	59.62	2.198	63.967	2.324	60.2	-7.556	890.008	73.579	0.268594
2019-01-18 21:00:00	1.104	62.133	2.301	58.304	2.722	69.067	2.702	65.9	-7.091	889.8	73.237	0.319044
2019-01-18 21:15:00	1.168	62.175	1.841	58.758	2.292	69	2.56	66	-7.19	889.792	73.888	0.174799
2019-01-18 21:30:00	0	62.13	1.316	59.133	2.003	69	2.567	66	-7.051	889.325	74.56	0.121507
2019-01-18 21:45:00	0	62.148	0.476	55.962	1.696	58.8	2.405	65	-7.502	889.483	74.549	0.327571
2019-01-18 22:00:00	0	62.135	0.163	55.106	1.666	62.9	1.905	65.567	-7.144	890.117	75.307	0.30128
2019-01-18 22:15:00	0	62.138	0	55.14	0.106	58.033	0.974	65	-7.267	889.692	77.248	0.305544
2019-01-18 22:30:00	0	62.15	0	55.138	0.319	58	1.377	65	-7.406	889.817	79.456	0.294175
2019-01-18 22:45:00	0.08	62.15	1.163	68.442	1.904	72	2.325	69	-7.539	890.179	82.496	0.289911
2019-01-18 23:00:00	1.266	88.367	1.772	85.197	2.509	86.3	3.099	77.7	-7.772	890.3	83.733	0.303412
2019-01-18 23:15:00	0.21	110.29	0.717	104.284	1.381	121.667	1.942	98.933	-7.732	890.175	84.117	0.274989
2019-01-18 23:30:00	1.506	159.94	1.472	130.447	2.135	126.667	2.502	114.333	-7.719	889.846	84.267	0.306965
2019-01-18 23:45:00	1.823	192.533	1.317	146.037	1.3	141.033	1.559	117.033	-8.391	890.562	85.227	0.289911
2019-01-19 00:00:00	1.961	203.72	1.401	177.137	1.457	169.967	1.462	128.267	-8.13	889.742	85.845	0.294175
2019-01-19 00:15:00	1.637	204.873	0.584	179.571	0.277	173.067	1.215	135	-8.371	889.996	86.4	0.299859
2019-01-19 00:30:00	0.392	212.54	0	179.577	0	171	1.072	134.867	-7.97	890.212	86.08	0.304123
2019-01-19 00:45:00	0.116	212.42	0	179.491	0	171	0.453	135	-8.331	890.196	86.187	0.294175
2019-01-19 01:00:00	1.086	213.447	0	179.646	0	171	0	135.067	-8.25	890.162	86.059	0.297017
2019-01-19 01:15:00	1.173	240.447	0	189.507	0	170.933	0	135	-8.25	889.988	85.76	0.298438
2019-01-19 01:30:00	1.432	245.12	0	189.475	0	171	0	135	-8.13	890.062	86.123	0.299859
2019-01-19 01:45:00	1.26	254.493	0	189.483	0	171	0	134.8	-8.11	890.229	86.293	0.298438
2019-01-19 02:00:00	1.203	254.373	0	189.509	0	171.067	0.393	133.6	-8.271	890.058	87.296	0.299859
2019-01-19 02:15:00	0.588	254.973	0	189.459	0	150.233	1.172	100	-8.371	890.242	87.637	0.298438
2019-01-19 02:30:00	0	255.433	0	189.554	0.216	114.2	1.458	100	-8.291	889.825	87.509	0.298438
2019-01-19 02:45:00	0	255.453	0	189.462	0	114.067	1.411	100.067	-8.23	889.908	87.659	0.298438
2019-01-19 03:00:00	0	254.5	0	189.557	0.892	113.533	2.129	102	-8.09	890.058	87.723	0.298438
2019-01-19 03:15:00	0	254.587	1.176	86.368	1.854	90.733	2.442	98.567	-8.314	890.462	87.979	0.318334
2019-01-19 03:30:00	0.324	13.029	1.623	56.278	2.259	67.067	2.893	76	-8.294	890.029	88.256	0.321176
2019-01-19 03:45:00	1.129	57.482	2.042	62.089	2.735	78.167	3.171	83.2	-8.621	889.846	88.448	0.222407
2019-01-19 04:00:00	0.58	71.2	2.037	73.576	2.231	89.7	2.022	96.467	-8.674	889.9	89.045	0.958555
2019-01-19 04:15:00	0.06	70.8	1.336	65.314	1.847	86.4	1.959	91.767	-8.958	890.158	88.448	0.393654
2019-01-19 04:30:00	0.4	51.733	1.09	64.318	1.722	81.8	2.251	90.967	-9.008	890.238	89.344	0.081005
2019-01-19 04:45:00	0	49.1	1.063	60.922	1.192	67.9	1.626	79.633	-8.924	889.929	89.515	0.267884
2019-01-19 05:00:00	0	48.3	1.061	43.619	1.358	56	1.527	77.1	-8.958	890.846	89.579	0.305544
2019-01-19 05:15:00	0	48.1	0.396	41.147	0.855	57.1	1.794	77.267	-9.124	889.792	90.027	0.294175
2019-01-19 05:30:00	0.844	217.64	0	41.131	0	62.008	0.027	78	-9.258	889.408	90.389	0.299859
2019-01-19 05:45:00	1.343	279.733	0	41.098	0	62.146	0	78	-9.291	890.138	90.389	0.30128
2019-01-19 06:00:00	1.73	284.8	0	26.164	0	62.125	0	77.9	-9.274	889.633	90.347	0.298438
2019-01-19 06:15:00	2.3	274.6	1.138	290.367	0	62	0	77.933	-9.091	889.833	90.496	0.308386
2019-01-19 06:30:00	1.37	288.6	0	287.1	0	62.096	0	78	-9.141	890.146	90.155	0.311228
2019-01-19 06:45:00	1.073	288.867	0	286.842	0	62.079	0	78	-9.124	889.846	90.368	0.315492
2019-01-19 07:00:00	1.103	300.8	0	286.796	0	62.083	0.466	78	-8.941	890.229	90.133	0.31407
2019-01-19 07:15:00	1.559	326.467	0.896	338.788	0.815	22.5	1.432	45	-8.891	890.067	89.856	0.316913
2019-01-19 07:30:00	1.659	324.8	1.086	344.92	0	17.733	0.981	44.833	-9.341	889.888	89.963	0.318334
2019-01-19 07:45:00	1.517	324.8	1.03	349.038	0.174	15.533	1.091	46.867	-9.291	890.246	90.261	0.308386
2019-01-19 08:00:00	1.86	326.8	1.007	351.042	0.852	15.948	1.549	47.9	-9.091	890.012	90.475	0.312649
2019-01-19 08:15:00	1.814	330.8	1.225	350.862	1.047	16.063	1.49	48	-9.241	890.117	90.411	0.305544
2019-01-19 08:30:00	2.172	322.133	1.992	349.83	0.878	13.664	1.303	43.467	-9.241	890.058	90.368	0.308386
2019-01-19 08:45:00	1.971	311.053	1.452	338.711	0.033	0	0.722	38.033	-9.304	889.888	90.155	0.305544
2019-01-19 09:00:00	1.966	291.867	0.436	336.693	0	0.133	0	38	-9.412	889.642	90.165	0.304123
2019-01-19 09:15:00	2.088	290.4	1.08	335.045	0	0	0	38	-9.704	889.262	90.027	0.304123
2019-01-19 09:30:00	1.86	280.92	0.505	335.056	0	0	0.034	38	-9.662	890.121	89.941	0.302701
2019-01-19 09:45:00	1.815	277.413	0.35	334.947	0	0.133	0.225	38	-9.954	890.104	89.536	0.299859
2019-01-19 10:00:00	1.374	291.2	1.068	335.272	0.86	3.844	1.353	38	-9.241	889.775	89.696	0.305544
2019-01-19 10:15:00	1.273	300.133	1.601	331.426	1.796	16.949	2.158	38	-9.174	890.425	87.925	0.332545
2019-01-19 10:30:00	1.367	325.2	1.808	7.89	2.064	38.477	2.142	45.867	-9.224	890.221	87.509	0.33823
2019-01-19 10:45:00	0	326.267	0	39.143	0.309	80.025	1.245	71	-9.274	889.862	87.616	0.311228
2019-01-19 11:00:00	0	299.36	0	78.274	0	80.192	0.35	71	-8.234	890.017	87.68	0.315492
2019-01-19 11:15:00	0.416	80.34	0.14	66.671	0	80	0.097	70.9	-8.584	889.758	84.587	0.312649
2019-01-19 11:30:00	0.07	130.4	0	68.176	0	80.133	0	70.833	-8.841	889.812	83.989	0.318334
2019-01-19 11:45:00	0.542	185.9	0.19	188.609	0.04	180.9	0.212	106	-7.756	889.608	82.187	0.319755
2019-01-19 12:00:00	2.027	204.933	1.883	198.931	1.873	204.633	1.273	181.733	-7.606	889.767	80.523	0.304123
2019-01-19 12:15:00	1.874	209.5	1.636	208.044	1.386	215.267	1.395	203.767	-6.578	890.2	80.085	0.311228
2019-01-19 12:30:00	2.009	215.6	1.869	215.261	1.54	219	1.118	204	-5.733	889.8	76.032	0.309807
2019-01-19 12:45:00	1.826	227.033	1.864	224.138	1.934	222.767	1.515	211.333	-5.402	890.158	72.907	0.311228
2019-01-19 13:00:00	1.243	215.42	1.26	215.2	1.486	217.567	1.327	218.1	-4.579	890.167	67.552	0.309807
2019-01-19 13:15:00	0	214.52	0.03	216.46	0.093	224	0	205.867	-2.476	890.142	61.717	0.30128
2019-01-19 13:30:00	1.676	118.204	1.531	90.976	1.476	88.733	1.363	164.733	-3.358	890.058	54.917	0.31407
2019-01-19 13:45:00	1.576	17.892	1.486	15.583	1.56	40.667	1.428	25.7	-5.604	890.083	56.747	0.324018
2019-01-19 14:00:00	0.887	28.958	1.056	25.55	1.386	32.367	1.404	23.833	-5.452	889.867	59.477	0.292753
2019-01-19 14:15:00	0	62.028	0	21.06	0.07	23.967	0.138	31	-4.411	889.417	60.789	0.298438
2019-01-19 14:30:00	0	276.363	0	20.078	0	4.011	0	31	-4.325	889.733	58.955	0.309807
2019-01-19 14:45:00	0.063	54.301	0	53.628	0.027	143.533	0	33.3	-3.994	889.592	57.451	0.299859
2019-01-19 15:00:00	0.28	117.153	0.106	108.946	0.39	129.567	0.427	52	-4.076	890.058	54.315	0.30128
2019-01-19 15:15:00	0.027	26.294	0	117.288	0.173	153.733	0	79.033	-4.673	889.842	55.52	0.289911
2019-01-19 15:30:00	0.609	38.323	0.067	34.111	0.223	328	0.04	47.125	-4.656	889.733	56.245	0.292753
2019-01-19 15:45:00	0.276	19.143	0.087	15.052	0.16	102.067	0.165	5.738	-4.305	890	55.296	0.295596
2019-01-19 16:00:00	0.293	18.319	0	0	0	16	0.124	3.933	-5.002	889.683	56.459	0.292753
2019-01-19 16:15:00	0.319	48.573	0.073	26.873	0.21	45	0.457	38.1	-4.566	890	56.8	0.298438
2019-01-19 16:30:00	0.609	0	0.263	77.498	0.624	21.233	0.863	30.867	-4.696	889.858	58.24	0.30128
2019-01-19 16:45:00	0.669	223.521	0.427	317.828	0.686	0	0.779	7.067	-5.052	890.383	60.613	0.294175
2019-01-19 17:00:00	1.272	17.586	0.979	24.743	1.349	26.967	1.646	23.367	-4.885	889.75	60.971	0.279253
2019-01-19 17:15:00	1.34	20.991	1.387	17.285	1.639	19.967	2.173	22.933	-4.769	890.067	57.536	0.277121
2019-01-19 17:30:00	1.869	31.977	1.741	25.792	1.845	33.767	2.054	34.933	-5.069	890.108	56.459	0.298438
2019-01-19 17:45:00	2.332	304	2.192	303.462	1.96	307.367	2.015	312.333	-5.518	889.533	67.344	0.305544
2019-01-19 18:00:00	2.686	286.347	2.081	283.106	1.376	305.6	1.267	327.433	-5.918	890.083	72.469	0.306965
2019-01-19 18:15:00	3.026	273.933	3.202	272.252	2.536	281.1	1.903	291.6	-6.378	890.067	75.376	0.299859
2019-01-19 18:30:00	3.072	266.653	3.242	269.006	2.636	278.4	2.015	282.933	-6.972	890.008	76.811	0.309807
2019-01-19 18:45:00	3.348	247.867	3.232	254.423	2.402	268.067	1.436	282.033	-7.472	889.858	78.24	0.31407
2019-01-19 19:00:00	3.809	223.433	3.333	244.498	2.592	255	1.728	271.4	-8.558	889.783	79.435	0.326861
2019-01-19 19:15:00	4.517	223.26	3.158	242.513	2.328	252.7	1.597	267.967	-9.454	890.017	80.149	0.321176
2019-01-19 19:30:00	4.632	225.3	2.757	242.96	1.572	263	0.778	268.967	-10.283	889.992	79.755	0.322597
2019-01-19 19:45:00	5.108	224.46	2.694	241.846	1.953	256.233	0.957	268.1	-10.793	890.117	80.491	0.279253
2019-01-19 20:00:00	4.698	225.62	3.84	246.495	3.008	264	2.488	272.3	-10.262	890.017	83.605	0.329703
2019-01-19 20:15:00	5.089	229.047	2.655	247.588	1.654	262.033	1.181	267.2	-10.778	889.7	79.099	0.319755
2019-01-19 20:30:00	5.87	222.32	4.491	228.236	3.014	235.933	1.898	231.3	-12.016	890.358	78.667	0.318334
2019-01-19 20:45:00	5.555	223.827	3.138	229.484	2.277	235.433	1.307	223	-12.161	889.458	80.619	0.321176
2019-01-19 21:00:00	5.738	225.6	3.392	226.266	2.346	224.667	1.29	211.45	-12.47	889.758	79.445	0.316913
2019-01-19 21:15:00	5.747	227.933	3.258	230.317	2.115	232.867	0.958	217	-12.403	889.808	79.669	0.305544
2019-01-19 21:30:00	5.826	226.767	2.996	230.257	1.585	230.633	0.319	219.933	-12.97	889.842	78.112	0.319755
2019-01-19 21:45:00	5.651	225.267	2.684	225.984	1.519	220.033	1.225	194.1	-13.07	889.767	79.019	0.333966
2019-01-19 22:00:00	4.664	218.74	1.857	206.568	1.559	192.833	1.754	154.867	-13.14	889.7	79.04	0.356704
2019-01-19 22:15:00	4.602	213.633	2.642	194.225	2.2	176.6	2.64	150.433	-11.118	889.875	78.4	0.235198
2019-01-19 22:30:00	4.394	214.607	2.442	186.164	2.488	169.3	2.677	151.567	-10.741	889.767	71.893	1.80342
2019-01-19 22:45:00	3.536	208.233	2.985	184.412	2.625	176.4	2.338	150.2	-10.149	889.608	68.608	3.46472
2019-01-19 23:00:00	4.182	200.8	3.39	169.211	3.15	155.5	3.898	142.967	-11.328	890.108	63.445	4.17742
2019-01-19 23:15:00	3.939	206.84	2.856	161.035	3.028	150.933	3.24	142.433	-11.932	889.417	66.325	3.56562
2019-01-19 23:30:00	4.422	202.067	3.166	173.745	2.91	165.9	2.982	148.6	-11.528	890.05	69.035	2.16723
2019-01-19 23:45:00	4.965	204.367	3.684	178.398	2.909	168.2	2.636	148.1	-11.786	889.592	72.789	1.71886
2019-01-20 00:00:00	5.277	201.967	4.286	186.837	3.308	181.833	2.906	166.833	-11.161	889.625	79.989	0.615351
2019-01-20 00:15:00	4.415	208.613	3.958	194.836	3.327	196	2.753	183.2	-10.939	889.667	75.456	0.083136
2019-01-20 00:30:00	4.587	204.133	3.56	184.435	3.279	183.5	3.244	179.433	-11.078	889.65	78.304	0.212459
2019-01-20 00:45:00	4.2	204.867	3.333	181.119	2.629	176.1	2.533	169.967	-11.245	889.733	79.552	0.282095
2019-01-20 01:00:00	3.684	200.407	2.896	167.507	2.404	166.7	2.519	160.567	-11.932	889.967	77.067	0.28849
2019-01-20 01:15:00	3.763	190.813	3.064	156.879	2.469	152.067	2.448	144.467	-12.399	889.817	78.304	1.38987
2019-01-20 01:30:00	3.581	198.82	2.77	145.65	2.173	143.867	2.134	138.133	-13.758	890.008	79.307	0.869734
2019-01-20 01:45:00	4.76	203.1	4.12	171.106	3.288	169.3	2.891	155.767	-13.672	889.842	81.184	2.32
2019-01-20 02:00:00	5.322	189.44	3.999	165.883	3.191	162.967	2.933	150.033	-13.124	889.8	80.043	4.58458
2019-01-20 02:15:00	5.434	190.467	4.106	169.804	3.149	169.033	2.522	152.567	-13.766	890.15	80.32	5.55663
2019-01-20 02:30:00	5.3	200.1	5.624	178.83	4.357	180.3	3.482	170.3	-13.484	889.892	80.725	4.16037
2019-01-20 02:45:00	5.778	197.667	6.156	181.038	5.133	179.8	4.018	169.433	-12.553	890.012	81.312	3.8598
2019-01-20 03:00:00	5.825	197.867	5.974	179.601	4.413	176.867	3.337	161.733	-13.203	889.95	80.096	4.56042
2019-01-20 03:15:00	4.024	205.8	5.443	181.814	3.907	180.433	2.585	166.833	-13.578	890.067	78.976	1.69683
2019-01-20 03:30:00	4.578	209.547	3.937	182.293	2.076	181.367	1.33	155.067	-13.289	889.933	81.291	0.79015
2019-01-20 03:45:00	4.167	208.467	3.043	174.804	1.424	152.533	2.028	127.433	-13.086	889.892	79.893	0.182616
2019-01-20 04:00:00	3.189	216.567	1.114	166.497	2.038	136.5	2.652	116.433	-12.986	889.925	80.544	0.202512
2019-01-20 04:15:00	3.726	208.967	2.855	159.008	2.465	131.033	2.829	96.767	-12.886	889.383	78.88	0.247988
2019-01-20 04:30:00	3.556	200.88	3.039	164.937	2.662	150.667	2.994	133.967	-12.078	890.021	80.395	0.117244
2019-01-20 04:45:00	3.394	199.227	2.903	168.434	2.173	166.1	1.984	153.967	-11.953	889.742	77.003	0.083847
2019-01-20 05:00:00	3.567	183.487	3.289	143.897	2.526	137.533	2.426	124.233	-12.282	889.683	72.523	0.069636
2019-01-20 05:15:00	5.266	179.653	4.135	159.574	3.469	155.2	3.314	144.267	-11.201	889.675	73.205	0.751069
2019-01-20 05:30:00	5.375	191.267	4.428	156.599	3.785	153.533	3.468	143.633	-13.451	890.375	73.419	3.32972
2019-01-20 05:45:00	5.282	198.58	4.324	169.4	3.286	162.1	3.249	148.5	-13.178	889.908	71.979	3.4093
2019-01-20 06:00:00	5.144	195.2	4.367	166.494	3.339	159.733	3.271	146.233	-12.82	889.792	72.971	3.41925
2019-01-20 06:15:00	3.692	207.147	4.018	174.03	2.088	161.967	1.744	144.6	-13.72	890.233	74.763	0.768123
2019-01-20 06:30:00	4.532	202.953	3.48	168.667	2.309	157.533	2.163	139.9	-13.316	890.025	75.456	0.245146
2019-01-20 06:45:00	4.213	199.367	3.015	163.924	2.663	153.9	2.383	138.367	-13.391	889.858	74.272	0.167694
2019-01-20 07:00:00	5.306	196.72	3.517	164.973	3.037	157.967	2.993	148.8	-13.691	889.533	74.731	1.40621
2019-01-20 07:15:00	5.284	188.233	3.194	162.701	2.755	155.167	2.872	143	-13.086	890.2	74.891	1.17528
2019-01-20 07:30:00	4.411	204.433	3.226	157.029	2.623	142.833	2.234	135.233	-13.933	889.542	73.099	1.31171
2019-01-20 07:45:00	5.555	199.367	3.861	166.801	2.686	149.9	2.459	131.733	-13.672	890.183	76.693	1.07082
2019-01-20 08:00:00	4.456	196.667	3.466	156.59	2.942	144.8	2.549	133.033	-13.136	889.683	75.093	2.93322
2019-01-20 08:15:00	4.309	199.233	4.252	151.455	3.254	137.933	3.445	127.433	-14.066	889.733	72.288	5.19211
2019-01-20 08:30:00	4.069	197.667	3.906	147.45	3.414	140.6	2.762	135.1	-14.166	890.05	74.475	5.0976
2019-01-20 08:45:00	4.1	192.14	3.764	136.454	3.853	127.333	4.438	120.367	-13.412	890.092	71.435	5.75701
2019-01-20 09:00:00	4.119	186.033	3.702	141.929	3.576	132.933	4.11	117.267	-13.672	889.558	74.101	4.92209
2019-01-20 09:15:00	4.453	185.4	3.362	140.138	2.689	137.567	3.583	123.967	-13.672	889.75	74.123	2.41379
2019-01-20 09:30:00	5.387	187.333	3.857	154.418	3.273	143.867	2.737	134.267	-12.62	889.75	70.795	2.79821
2019-01-20 09:45:00	4.749	180.34	3.923	145.714	3.172	139.5	2.895	128.033	-11.916	889.892	67.744	2.89698
2019-01-20 10:00:00	4.146	178.5	3.496	143.74	3.014	139.867	2.657	131.8	-10.399	889.683	62.261	3.20039
2019-01-20 10:15:00	3.092	166.267	3.377	133.777	3.429	131	3.807	122.6	-9.704	890.017	58.357	4.0417
2019-01-20 10:30:00	2.598	166.8	4.101	127.637	4.252	121.5	4.342	117.267	-9.908	890.075	58.411	5.4202
2019-01-20 10:45:00	1.811	170.8	3.662	131.819	3.75	123.467	4.022	117.567	-9.808	890.033	63.136	4.06728
2019-01-20 11:00:00	2.275	162.633	2.946	137.077	2.675	138.733	2.489	130.933	-8.724	890.142	61.717	2.77192
2019-01-20 11:15:00	2.631	148.467	2.85	126.67	3.49	121.267	4.005	115.8	-7.689	889.533	58.592	3.70703
2019-01-20 11:30:00	2.539	109.653	2.447	102.006	2.277	101.933	2.502	96.467	-6.797	890.242	55.477	3.29063
2019-01-20 11:45:00	2.997	101.35	2.565	90.832	2.483	94.6	2.575	89.633	-5.898	889.875	52.245	2.84156
2019-01-20 12:00:00	4.522	90.987	4.316	84.926	4.042	89.933	4.303	84.667	-6.116	889.833	51.659	4.87591
2019-01-20 12:15:00	4.116	100.473	3.726	94.184	3.419	97.5	3.501	93.667	-6.037	889.725	51.168	7.37639
2019-01-20 12:30:00	4.773	103.413	4.62	98.412	4.217	100.6	4.208	95.733	-5.498	890.008	50.08	8.50406
2019-01-20 12:45:00	5.416	101.82	5.117	96.355	4.644	102.133	4.769	98.067	-5.918	889.683	49.877	11.8885
2019-01-20 13:00:00	5.97	110.24	5.59	102.982	5.608	105.667	5.771	102.367	-5.756	890.175	49.216	16.4255
2019-01-20 13:15:00	5.617	104.867	5.455	102.214	5.505	107.333	5.596	105.433	-5.219	889.792	47.424	18.2303
2019-01-20 13:30:00	5.406	116.15	5.728	109.312	5.744	114.267	5.685	108.2	-4.952	889.742	46.24	20.2675
2019-01-20 13:45:00	5.674	117.873	6.03	110.789	5.874	115.9	5.876	110.867	-4.869	890.1	44.832	16.159
2019-01-20 14:00:00	4.97	112.373	5.495	110.454	5.537	114	5.863	108.8	-4.685	889.933	45.195	13.9705
2019-01-20 14:15:00	5.072	104.913	4.594	96.734	4.514	100.567	4.766	93.633	-3.986	889.817	45.109	14.5048
2019-01-20 14:30:00	5.246	114.06	5.23	108.531	5.125	113.3	5.392	111.267	-4.082	889.7	44.971	12.9828
2019-01-20 14:45:00	4.761	102.7	4.683	97.502	4.632	102.5	4.774	97.667	-3.371	889.517	45.088	9.52657
2019-01-20 15:00:00	4.485	108.267	4.34	101.11	4.334	103.833	4.427	97.8	-3.538	890.25	44.203	10.095
2019-01-20 15:15:00	5.148	109.167	4.774	104.824	4.762	106.733	5.04	100.7	-3.404	889.95	42.72	11.9354
2019-01-20 15:30:00	4.982	101.233	4.726	94.052	4.41	98.767	4.815	90.833	-3.321	889.717	42.037	16.1768
2019-01-20 15:45:00	6.344	89.787	6.396	85.115	5.935	90.167	5.989	87.267	-2.76	889.825	40.667	25.132
2019-01-20 16:00:00	5.838	102.137	5.918	95.168	5.637	98.967	5.736	94.433	-2.879	889.733	39.115	28.9044
2019-01-20 16:15:00	6.45	91.633	6.366	84.352	5.968	90.367	5.847	87.933	-3.271	889.683	38.475	33.3675
2019-01-20 16:30:00	6.224	97.133	6.16	92.465	5.256	99.1	5.063	95	-3.121	889.667	38.453	33.5615
2019-01-20 16:45:00	6.605	98.763	6.525	93.51	5.954	99.367	5.389	93.2	-2.74	889.367	38.837	33.1209
2019-01-20 17:00:00	6.258	90.733	6.167	87.207	5.748	92.5	5.842	87.967	-3.321	889.8	38.651	32.173
2019-01-20 17:15:00	5.933	98.033	5.734	92.628	5.16	96.433	5.007	93.067	-3.237	890	38.949	31.9762
2019-01-20 17:30:00	6.38	101.167	5.504	94.016	5.066	97.1	5.208	93.833	-3.187	889.583	38.656	28.3353
2019-01-20 17:45:00	5.229	103.067	5.3	96.757	4.805	104.567	4.891	96.467	-3.572	889.867	39.595	25.9534
2019-01-20 18:00:00	4.861	97.7	4.965	92.87	4.423	97.3	4.418	93.4	-3.622	889.417	40.315	21.2935
2019-01-20 18:15:00	5.128	93.227	5.234	88.962	3.871	96.7	3.736	89.133	-4.398	889.867	41.483	19.4617
2019-01-20 18:30:00	4.518	88.167	4.889	82.039	4.911	86.833	4.924	83.4	-5.352	889.817	44.309	17.065
2019-01-20 18:45:00	4.857	89.487	4.878	89.776	4.057	92.933	3.864	89.933	-5.918	890	44.896	16.0098
2019-01-20 19:00:00	3.895	100.533	4.006	96.878	2.987	100.033	3.52	100.233	-6.495	889.767	46.869	16.0155
2019-01-20 19:15:00	4.386	102.073	4.751	98.506	3.979	103.033	4.098	97.233	-6.735	889.825	46.773	12.7817
2019-01-20 19:30:00	3.81	109.433	4.413	101.89	3.988	107.1	4.026	103.533	-6.826	889.9	46.709	10.1504
2019-01-20 19:45:00	3.618	119.563	3.827	104.667	4.002	111.933	4.387	110.1	-7.071	890.3	47.349	6.24872
2019-01-20 20:00:00	3.433	124.09	3.695	106.23	3.811	113.4	4.337	112.733	-6.972	889.9	48.043	4.41049
2019-01-20 20:15:00	3.212	126.05	3.712	105.812	4.055	111.733	4.55	109.833	-6.856	889.892	48.341	4.16534
2019-01-20 20:30:00	3.18	118.68	3.352	99.254	2.801	101.733	3.722	102.767	-7.833	889.925	51.424	4.69187
2019-01-20 20:45:00	2.932	192.533	2.345	167.04	1.767	152.067	1.988	117	-9.566	890.308	56.267	2.28376
2019-01-20 21:00:00	2.892	200.073	2.048	162.414	2.351	131.333	2.525	97.967	-10.784	889.825	59.275	0.434867
2019-01-20 21:15:00	2.552	207.867	1.606	170.371	1.86	138.567	2.869	105.033	-11.499	889.608	61.44	0.637378
2019-01-20 21:30:00	1.521	182.753	1.814	122.046	2.381	111.767	3.204	102.433	-9.312	889.875	61.888	1.86666
2019-01-20 21:45:00	2.1	175.133	2.186	125.272	3.13	117.933	3.864	109.967	-8.724	889.883	57.653	2.52038
2019-01-20 22:00:00	1.989	169.333	2.377	120.47	3.442	117.233	4.256	108.267	-8.591	890.017	56.427	2.84369
2019-01-20 22:15:00	2.773	126.67	4.013	106.33	4.358	107	4.663	100.7	-8.17	889.433	53.899	7.23215
2019-01-20 22:30:00	3.587	123.073	4.765	105.946	4.741	107.233	4.932	101.4	-8.808	889.992	55.424	11.7052
2019-01-20 22:45:00	3.037	123.047	4.34	102.956	4.063	105.533	4.747	102.033	-9.191	889.642	55.029	9.47754
2019-01-20 23:00:00	4.589	106.237	5.064	100.768	4.566	104.933	4.993	98.067	-7.97	890.117	53.429	10.4944
2019-01-20 23:15:00	4.67	106.367	4.704	99.541	3.962	105.133	4.786	102.833	-7.606	889.892	52.352	12.2239
2019-01-20 23:30:00	4.305	106.733	4.381	97.118	3.948	100.867	4.457	96.767	-7.556	889.983	51.872	20.1687
2019-01-20 23:45:00	5.049	104.167	4.994	101.588	4.533	101.233	4.847	97.933	-7.606	890.117	51.755	23.8864
2019-01-21 00:00:00	4.706	97.333	4.303	95.292	4.096	100.633	4.956	96.733	-7.522	889.95	50.933	15.5934
2019-01-21 00:15:00	4.345	133.467	5.222	115.612	5.688	117.2	6.263	109.967	-9.628	890.092	56.213	13.0176
2019-01-21 00:30:00	4.317	146.667	4.857	122.588	5.072	124.067	5.723	119.733	-9.074	889.575	57.728	14.8857
2019-01-21 00:45:00	3.578	180.987	4.091	129.454	4.493	115.233	4.596	104.267	-11.703	890.258	61.013	8.74708
2019-01-21 01:00:00	3.123	148.607	4.82	109.691	5.144	112.6	5.277	107.2	-10.12	889.767	59.221	7.64072
2019-01-21 01:15:00	4.889	127.31	5.381	107.07	5.519	111.567	6.221	105.933	-10.087	889.675	60.469	10.2329
2019-01-21 01:30:00	4.039	138.533	5.127	120.195	5.26	122.933	5.52	114.5	-8.571	889.717	53.493	20.0103
2019-01-21 01:45:00	3.633	161.807	4.126	128.208	4.431	122.7	4.644	116.833	-9.454	890.083	57.536	10.7637
2019-01-21 02:00:00	4.242	159.833	4.311	133.648	4.548	122.267	5.344	114.633	-10.062	889.917	59.093	9.90246
2019-01-21 02:15:00	4.072	174.267	3.597	139.801	3.877	128.667	4.925	114.533	-9.758	890.108	58.325	9.94367
2019-01-21 02:30:00	3.325	177.747	3.535	141.127	4.434	124.467	5.115	111.3	-10.651	889.942	60.533	13.4524
2019-01-21 02:45:00	3.169	156.98	4.061	127.271	4.615	122	5.032	108.7	-9.683	889.9	59.072	16.4574
2019-01-21 03:00:00	3.203	164.407	4.108	134.361	4.469	127.533	5.209	117.233	-10.054	889.7	59.179	13.0695
2019-01-21 03:15:00	3.168	182.02	3.441	140.27	3.229	134.467	3.624	123.733	-10.166	890.108	62.891	10.6429
2019-01-21 03:30:00	3.533	168.98	3.684	135.729	3.717	128.567	4.527	119.867	-9.941	889.558	63.221	7.65138
2019-01-21 03:45:00	2.859	159.267	3.533	124.306	3.775	123.833	4.386	114.233	-9.704	889.608	63.68	7.39274
2019-01-21 04:00:00	3.14	146.133	4.26	118.433	4.882	118.533	5.491	109.867	-9.324	890.242	62.592	9.16631
2019-01-21 04:15:00	4.058	130.267	5.277	114.675	5.852	116.433	6.378	110.833	-9.141	889.675	62.432	14.8828
2019-01-21 04:30:00	3.4	153.107	4.921	120.651	5.25	121.5	5.597	113.333	-10.004	890.025	62.464	16.4056
2019-01-21 04:45:00	3.599	160.36	5.321	119.79	5.912	117.833	6.267	110.567	-9.083	889.758	59.68	16.0133
2019-01-21 05:00:00	2.96	163.74	4.605	114.084	5.298	116.133	5.219	106.667	-10.37	889.817	62.368	13.8525
2019-01-21 05:15:00	3.16	181.42	3.585	125.877	4.056	116.367	4.123	105.567	-11.703	890.033	64.405	10.6429
2019-01-21 05:30:00	2.588	173.133	3.114	123.687	3.537	118.433	4.096	111.533	-11.101	889.783	65.877	4.13194
2019-01-21 05:45:00	3.168	198.1	2.586	150.825	3.101	129.733	4.081	114.6	-11.428	889.9	68.405	3.7255
2019-01-21 06:00:00	2.815	200.133	1.978	160.929	2.125	140.2	2.999	123.167	-10.249	890.05	68.203	1.70465
2019-01-21 06:15:00	3.342	211.913	1.897	177.729	1.757	165.233	2.129	143.667	-10.966	889.533	66.251	0.309097
2019-01-21 06:30:00	1.98	199.533	1.842	139.979	2.355	129.1	2.659	120.867	-10.333	889.908	65.963	0.343914
2019-01-21 06:45:00	0.06	199	1.706	107.481	2.447	100.767	2.854	90.933	-10.099	890.017	68.565	0.35102
2019-01-21 07:00:00	2.912	184.353	2.581	129.448	2.921	118.167	3.182	108.7	-11.003	890.175	68.149	0.471816
2019-01-21 07:15:00	1.937	181.527	1.577	129.156	2.048	123.1	2.428	118	-9.87	889.867	68.469	0.208196
2019-01-21 07:30:00	0.227	117.107	2.36	81.203	2.642	83.167	2.744	80.933	-9.649	890.342	67.499	0.284227
2019-01-21 07:45:00	2.249	213.82	0.47	143.214	1.938	90.867	3.152	81.633	-12.116	889.708	66.069	2.54596
2019-01-21 08:00:00	1.428	201.3	1.411	115.769	1.905	100.533	2.548	92.767	-12.47	889.908	67.189	2.01801
2019-01-21 08:15:00	1.557	186.667	1.854	114.808	2.001	104.433	1.968	89.633	-12.82	889.883	70.773	1.58598
2019-01-21 08:30:00	1.663	183.6	1.832	127.472	2.347	113.4	2.645	104.133	-12.203	889.908	71.659	0.43842
2019-01-21 08:45:00	2.583	207.307	1.644	149.322	2.117	134.733	2.933	113.233	-11.761	890.092	68.181	0.36381
2019-01-21 09:00:00	3.148	211.333	1.736	163.426	2.02	138.5	3.141	124.2	-11.295	890.308	65.877	0.279963
2019-01-21 09:15:00	2.936	213.973	1.401	157.176	1.306	142.867	2.163	131.867	-10.834	889.708	64.619	0.159877
2019-01-21 09:30:00	3.328	214.853	1.403	155.616	1.824	136.333	3.02	117.067	-11.103	889.833	63.477	0.289201
2019-01-21 09:45:00	2.471	209.127	1.159	157.105	2.097	129.9	3.182	106.167	-10.091	889.783	64.128	0.220276
2019-01-21 10:00:00	3.516	221.747	1.157	188.649	1.106	148	1.761	134.233	-9.995	889.833	59.957	0.331124
2019-01-21 10:15:00	2.09	215.867	1.096	180.689	1.709	143.267	2.258	134	-8.674	889.733	58.4	0.319755
2019-01-21 10:30:00	1.638	213.007	1.295	160.9	1.581	141.267	2.512	129.7	-8.454	889.767	57.419	0.324018
2019-01-21 10:45:00	1.296	196.64	1.423	119.832	2.511	110.933	3.354	106.733	-7.97	889.608	58.421	0.281384
2019-01-21 11:00:00	0.483	156.007	1.961	107.307	3.027	104.7	3.15	104.3	-7.97	890.317	58.901	0.692092
2019-01-21 11:15:00	1.904	137.747	2.521	121.6	3.025	124.7	3.464	118.167	-7.639	889.575	56.032	3.33398
2019-01-21 11:30:00	2.005	189.867	1.8	187.597	1.653	174.8	2.22	137.7	-6.445	890.15	53.504	2.10399
2019-01-21 11:45:00	0.549	198.233	0.077	168.086	0.626	143.2	1.403	131.067	-4.206	889.725	51.2	0.729752
2019-01-21 12:00:00	0.626	139.623	0.74	130.622	0.764	136.667	1.721	120.433	-2.922	890.175	44.661	0.298438
2019-01-21 12:15:00	3.438	119.717	3.836	113.349	3.874	110.9	4.328	113.167	-4.226	890.117	46.645	4.91783
2019-01-21 12:30:00	7.49	107.363	7.09	102.169	6.688	105.4	7.104	102.067	-4.384	889.908	48.757	20.8132
2019-01-21 12:45:00	7.293	111.537	7.33	103.602	7.187	108.9	7.06	104.167	-4.602	890.267	47.787	32.6989
2019-01-21 13:00:00	7.392	109.93	7.46	101.575	7.468	108.633	7.469	105.9	-4.186	890.183	47.477	45.2546
2019-01-21 13:15:00	7.319	108.333	7.573	104.62	7.276	110.067	7.201	103.9	-3.79	889.958	46.464	49.2771
2019-01-21 13:30:00	8.584	107.267	7.79	101.266	7.894	103.833	8.004	99.1	-3.471	889.983	45.163	48.5999
2019-01-21 13:45:00	8.258	96.5	8.187	95.135	7.304	101.233	7.148	94.933	-3.321	889.7	44.331	47.0559
2019-01-21 14:00:00	8.026	107.647	8.053	101.621	7.573	105.133	7.97	100.633	-2.975	889.625	44.448	51.6667
2019-01-21 14:15:00	7.434	104.03	7.24	97.346	7.012	101.667	6.829	96.833	-3.043	889.783	44.715	53.2555
2019-01-21 14:30:00	7.21	90.033	7.27	86.024	7.422	91.833	7.573	88.667	-3.387	889.758	44.555	46.4277
2019-01-21 14:45:00	7.09	90.553	6.538	89.977	6.439	93.3	6.184	88.167	-3.23	889.983	44.128	39.2538
2019-01-21 15:00:00	6.72	89.633	6.308	86.816	6.139	91.3	6.137	87.067	-3.354	889.417	44.053	35.583
2019-01-21 15:15:00	6.809	85.08	6.893	80.498	7.054	86.1	7.046	83.433	-2.892	890.192	43.765	32.9092
2019-01-21 15:30:00	5.993	95.557	5.916	89.745	5.844	92.633	6.104	83.633	-2.955	889.992	42.496	31.7893
2019-01-21 15:45:00	6.65	90.147	6.226	87.504	5.744	94.1	5.903	86.1	-2.942	889.55	42.144	29.4239
2019-01-21 16:00:00	5.635	78.433	5.983	73.505	6.324	79.233	6.541	75.333	-2.951	890.025	42.56	19.9449
2019-01-21 16:15:00	5.224	72.333	5.327	68.335	5.528	75.9	5.647	74.367	-3.187	889.6	42.091	13.0126
2019-01-21 16:30:00	5.02	80.327	5.024	74.021	4.638	80.233	4.832	80.1	-3.099	889.8	42.101	12.6239
2019-01-21 16:45:00	5.329	80.833	5.38	75.736	5.468	82.133	5.577	76	-3.421	889.85	42.144	13.1078
2019-01-21 17:00:00	4.826	89.967	4.776	82.675	4.561	85.533	4.723	80.833	-3.254	889.792	42.827	13.5896
2019-01-21 17:15:00	3.25	94.467	2.828	92.324	2.904	101.7	2.935	98.333	-3.806	890.05	43.072	7.1753
2019-01-21 17:30:00	3.321	107.67	2.66	97.678	2.346	98.233	2.9	92.7	-3.893	889.783	42.4	4.16037
2019-01-21 17:45:00	3.157	115.167	3.146	108.314	2.93	109.467	2.779	101.6	-3.689	889.942	42.325	2.62341
2019-01-21 18:00:00	3.28	93.067	3.248	90.051	3.16	94	3.157	94.1	-3.84	889.667	41.653	2.45146
2019-01-21 18:15:00	3.406	112.25	3.226	101.129	3.092	104.633	3.397	100.333	-4.305	890.133	42.688	2.52393
2019-01-21 18:30:00	2.97	101.86	2.843	97.64	2.316	101.7	2.187	93.4	-4.746	889.767	44.544	1.90006
2019-01-21 18:45:00	2.751	114.533	2.674	105.704	2.586	111.567	2.726	105.2	-5.285	890.258	46.304	0.707014
2019-01-21 19:00:00	2.331	124.393	2.46	113.166	2.492	122.1	2.539	117.467	-5.619	889.717	46.464	0.132165
2019-01-21 19:15:00	2.669	128.573	3.082	117.754	2.976	125.133	2.971	123.7	-5.997	889.675	47.456	0.196116
2019-01-21 19:30:00	2.208	160.133	2.2	133.957	2.093	142.667	2.284	134.5	-6.097	889.967	48.907	0.136429
[truncated: 68,177 more rows]
