# Supplementary material
Source: PeerJ journal article supplement (doi:10.7717/peerj-cs.3610)
Supplement: Wind_farm_site_2_Nominal_capacity200MW.xlsx [file Wind_farm_site_2_Nominal_capacity200MW.xlsx]

## Sheet: sheet1
Time(year-month-day h:m:s)	Wind speed at height of 10 meters (m/s)	Wind direction at height of 10 meters (˚)	Wind speed at height of 30 meters (m/s)	Wind direction at height of 30 meters (˚)	Wind speed at height of 50 meters (m/s)	Wind direction at height of 50 meters (˚)	Wind speed - at the height of wheel hub (m/s)	Wind speed - at the height of wheel hub (˚)	Air temperature (°C)	Atmosphere (hpa)	Power (MW)
2019-01-01 00:00:00	2.951	124.685	4.634	114.568	3.869	102.139	2.645	103.023	-12.735	887.187	33.4513
2019-01-01 00:15:00	2.951	129.697	2.951	118.488	2.951	97.463	2.186	108.914	-12.992	887.227	36.8113
2019-01-01 00:30:00	2.951	124.756	3.563	118.21	2.798	91.528	2.492	97.322	-12.745	887.094	31.1725
2019-01-01 00:45:00	2.186	129.019	2.339	112.761	2.339	94.015	1.281	99.393	-12.904	887.214	27.836
2019-01-01 01:00:00	2.033	121.358	1.88	105.626	2.186	99.392	2.186	95.703	-12.979	887.227	31.1928
2019-01-01 01:15:00	2.339	131.853	3.563	122.411	2.951	108.44	2.033	107.327	-12.772	887.107	35.7265
2019-01-01 01:30:00	2.798	126.433	3.716	115.811	3.257	106.459	2.951	96.27	-12.941	886.907	35.7114
2019-01-01 01:45:00	2.492	135.691	2.951	113.427	2.951	105.735	1.81	94.823	-13.009	886.735	43.9688
2019-01-01 02:00:00	2.492	125.197	2.951	105.846	3.563	93.844	3.41	100.413	-13.003	886.748	47.6917
2019-01-01 02:15:00	3.41	119.573	3.869	107.287	3.563	107.441	3.104	103.119	-12.64	886.614	45.8979
2019-01-01 02:30:00	3.257	123.473	4.634	117.143	4.022	103.693	2.798	96.166	-12.85	886.442	49.6631
2019-01-01 02:45:00	4.022	123.421	4.481	115.356	3.563	95.128	2.339	98.118	-13.019	886.282	56.9021
2019-01-01 03:00:00	3.716	122.18	4.787	109.803	4.481	102.76	3.563	105.95	-13.189	886.216	58.7819
2019-01-01 03:15:00	2.033	137.111	3.563	112.703	2.951	107.635	1.88	101.78	-13.686	886.083	63.6235
2019-01-01 03:30:00	1.727	131.131	2.951	104.344	3.257	98.834	2.186	102.065	-13.565	885.91	54.9008
2019-01-01 03:45:00	1.421	141.666	2.492	111.782	2.798	99.887	2.492	112.841	-13.852	885.977	44.69
2019-01-01 04:00:00	2.492	121.963	2.951	112.897	2.798	100.007	2.033	99.788	-13.608	885.884	40.7287
2019-01-01 04:15:00	2.033	127.875	2.186	107.011	1.657	101.211	2.339	114.813	-13.477	885.83	37.9734
2019-01-01 04:30:00	1.727	130.498	2.269	105.681	1.88	106.91	1.045	100.791	-13.378	885.817	41.7234
2019-01-01 04:45:00	2.339	126.121	2.339	103.877	2.645	94.924	2.339	93.65	-13.493	885.751	48.1475
2019-01-01 05:00:00	0.822	139.616	2.798	103.089	3.41	92.339	2.339	92.994	-13.737	885.631	43.9257
2019-01-01 05:15:00	0	100.068	1.421	97.78	2.798	90.437	2.186	95.294	-13.782	885.644	35.0592
2019-01-01 05:30:00	0	234.577	0.822	91.448	2.492	84.754	2.951	89.727	-14.106	885.644	41.393
2019-01-01 05:45:00	2.951	114.958	4.787	104.705	4.787	96.943	3.869	94.071	-13.88	885.431	41.0828
2019-01-01 06:00:00	3.563	122.063	4.022	107.652	4.175	85.849	4.787	87.228	-13.016	885.325	36.8929
2019-01-01 06:15:00	3.716	119.204	4.175	108.544	3.104	102.605	2.492	104.333	-12.996	885.338	36.1923
2019-01-01 06:30:00	3.716	109.757	4.328	94.832	4.328	86.84	4.022	89.326	-13.216	885.112	25.6265
2019-01-01 06:45:00	0.975	131.393	2.951	101.681	3.104	96.127	3.257	95.423	-13.643	885.178	21.6909
2019-01-01 07:00:00	1.115	177.606	0	107.742	1.574	94.861	1.727	94.312	-14.039	884.885	20.462
2019-01-01 07:15:00	0.223	138.445	1.88	107.185	2.186	93.339	2.339	93.118	-13.534	884.526	16.1993
2019-01-01 07:30:00	0	119.566	0.669	118.549	1.198	112.075	0.822	102.043	-13.46	884.726	13.7152
2019-01-01 07:45:00	0.446	130.131	1.268	96.356	2.339	92.815	2.492	94.924	-13.652	884.633	13.9165
2019-01-01 08:00:00	0.752	164.792	0.975	104.488	1.88	83.562	1.727	97.934	-13.656	884.713	14.5077
2019-01-01 08:15:00	0	135.064	0.892	86.739	1.88	93.104	1.727	93.106	-13.439	884.819	11.6065
2019-01-01 08:30:00	0	135.042	0	90.398	1.268	91.006	0.669	89.274	-13.612	885.059	8.17793
2019-01-01 08:45:00	1.88	290.065	2.492	327.602	2.339	148.311	1.045	95.665	-14.303	885.471	4.06113
2019-01-01 09:00:00	0	165.978	0.446	274.151	1.88	265.775	2.033	285.948	-14.191	885.631	0.723
2019-01-01 09:15:00	3.716	249.85	3.869	271.59	3.563	261.793	2.339	269.041	-14.361	885.658	0
2019-01-01 09:30:00	3.104	249.203	3.257	274.42	3.257	263.259	2.339	267.185	-14.086	885.95	0
2019-01-01 09:45:00	3.563	240.753	3.41	261.884	2.951	254.177	2.492	246.455	-13.737	885.936	0
2019-01-01 10:00:00	3.104	255.605	2.951	275.537	2.645	259.959	1.727	265.841	-13.873	886.083	0.2172
2019-01-01 10:15:00	2.951	254.152	2.951	283.064	2.492	284.142	0.975	316.793	-13.964	886.429	0.337933
2019-01-01 10:30:00	3.716	253.416	2.645	282.632	2.492	284.069	1.574	301.407	-13.842	886.655	0
2019-01-01 10:45:00	2.645	255.382	2.492	284.186	1.88	277.745	0.223	304.039	-13.358	886.868	0
2019-01-01 11:00:00	1.421	247.059	0.669	285.949	0.599	277.701	0	337.072	-12.907	887.254	0
2019-01-01 11:15:00	0.892	237.272	0.223	283.74	0	277.683	0	290.323	-12.44	887.852	0
2019-01-01 11:30:00	1.115	262.41	1.045	261.474	1.268	274.938	0	245.8	-11.844	888.29	0
2019-01-01 11:45:00	0	193.416	0	155.595	0	166.494	0.223	161.198	-11.169	888.57	0
2019-01-01 12:00:00	0.599	141.678	0.975	95.938	1.198	111.413	0.599	73.071	-10.258	889.062	0.162467
2019-01-01 12:15:00	0.223	122.771	1.421	109.715	1.504	106.482	0.752	116.961	-10.136	889.315	1.2794
2019-01-01 12:30:00	2.033	120.701	2.339	117.514	2.339	109.762	2.186	114.76	-10.373	889.395	1.6912
2019-01-01 12:45:00	3.41	115.403	3.104	103.121	3.563	97.693	2.951	96.407	-10.38	888.982	0.653733
2019-01-01 13:00:00	2.645	142.104	2.339	128.421	2.186	126.399	1.963	117.396	-10.082	888.996	0.851067
2019-01-01 13:15:00	2.798	116.592	3.104	97.676	3.716	90.718	2.728	97.323	-9.52	888.543	3.86887
2019-01-01 13:30:00	1.574	126.621	1.587	131.499	2.492	110.003	2.186	104.364	-8.958	888.33	5.24113
2019-01-01 13:45:00	1.421	153.174	1.88	135.734	1.727	133.074	1.198	126.644	-8.639	888.423	5.51887
2019-01-01 14:00:00	2.186	123.44	2.339	128.595	2.645	117.016	2.339	127.2	-8.311	888.344	4.24853
2019-01-01 14:15:00	0.599	129.238	1.198	114.591	1.504	105.17	1.727	96.011	-7.796	888.237	3.25827
2019-01-01 14:30:00	1.657	104.588	2.033	97.974	2.186	88.259	2.033	83.888	-7.135	888.011	2.72053
2019-01-01 14:45:00	1.504	124.084	1.351	108.328	1.727	102.861	1.88	100.833	-6.86	888.171	1.1766
2019-01-01 15:00:00	0.822	141.944	0.822	102.108	1.727	89.175	1.88	85.734	-7.464	887.772	1.13807
2019-01-01 15:15:00	0.669	152.841	0.892	147.11	1.421	124.179	1.115	127.072	-7.159	887.386	0.318
2019-01-01 15:30:00	0.599	123.971	0.599	101.084	1.198	93.489	1.045	98.802	-6.325	887.373	0
2019-01-01 15:45:00	0.822	78.676	1.198	72.874	0.822	107.731	0.822	122.83	-7.033	887.467	0
2019-01-01 16:00:00	0.446	47.998	0.669	25.735	0.669	281.933	0.223	209.504	-6.952	887.227	0
2019-01-01 16:15:00	0.223	63.321	0	56.231	0.223	102.014	0	70.536	-6.694	887.027	0
2019-01-01 16:30:00	0	204.355	0.223	141.841	0.223	124.512	0	116.403	-6.125	887.147	0
2019-01-01 16:45:00	0	15.02	0.223	0.01	0.223	53.31	0.223	152.263	-5.776	887.427	0
2019-01-01 17:00:00	0	340.937	0	8.625	0	45.999	0	318.232	-5.655	887.546	0
2019-01-01 17:15:00	0	134.322	0.223	346.672	0.223	324.711	0	143.842	-5.434	887.533	0
2019-01-01 17:30:00	0	145.202	0	346.635	0	300.9	0	143.865	-5.621	887.493	0
2019-01-01 17:45:00	0	145.119	0	45.767	0.223	301.067	0	143.858	-5.384	887.293	0
2019-01-01 18:00:00	0	145.086	0	45.777	0.822	301.616	0	109.346	-6.467	887.027	0
2019-01-01 18:15:00	1.727	74.65	1.574	58.486	1.574	50.092	1.421	63.01	-7.111	886.468	0
2019-01-01 18:30:00	1.115	57.273	1.574	68.473	2.033	65.104	1.88	70.422	-7.467	886.083	0.013667
2019-01-01 18:45:00	1.351	162.013	1.657	131.79	2.186	112.75	1.88	120.808	-7.769	885.551	1.2224
2019-01-01 19:00:00	2.645	168.332	2.645	133.716	3.257	118.852	2.951	124.744	-7.721	885.378	4.6748
2019-01-01 19:15:00	2.951	157.743	2.798	122.976	3.257	112.36	2.798	113.034	-7.796	885.258	7.9234
2019-01-01 19:30:00	3.104	146.034	3.869	125.44	3.41	117.201	2.951	113.91	-7.958	885.232	11.4997
2019-01-01 19:45:00	4.175	139.437	4.94	130.422	3.869	119.083	2.186	115.538	-8.239	885.072	12.1594
2019-01-01 20:00:00	3.716	141.294	3.563	122.339	2.951	111.101	2.033	105.57	-9.076	884.926	14.1558
2019-01-01 20:15:00	4.022	135.438	4.175	109.287	3.563	102.647	2.645	99.476	-9.337	884.726	14.6287
2019-01-01 20:30:00	4.481	136.208	4.787	122.407	3.869	109.066	2.339	105.995	-9.747	884.686	14.9653
2019-01-01 20:45:00	4.328	124.577	4.481	114.633	3.869	105.654	3.41	104.309	-9.821	884.42	14.1751
2019-01-01 21:00:00	4.022	125.958	4.481	117.135	3.257	103.609	3.257	106.188	-10.089	884.194	13.0346
2019-01-01 21:15:00	3.716	136.237	4.022	126.953	2.798	102.069	2.033	106.322	-10.424	884.34	11.7773
2019-01-01 21:30:00	3.563	133.548	4.328	113.489	4.175	102.486	3.563	97.972	-10.902	884.141	9.50907
2019-01-01 21:45:00	3.257	142.212	4.328	112.558	3.104	96.531	2.033	96.197	-11.271	884.062	6.3588
2019-01-01 22:00:00	2.645	138.446	3.563	116.877	2.798	96.193	2.116	100.812	-11.573	883.942	6.09393
2019-01-01 22:15:00	2.186	144.309	3.41	113.305	2.645	96.552	1.963	106.092	-11.667	883.875	6.396
2019-01-01 22:30:00	2.033	144.251	3.104	111.222	3.104	98.168	2.186	97.876	-11.85	883.889	7.92893
2019-01-01 22:45:00	2.186	121.654	3.257	102.374	3.869	94.391	3.104	106.373	-12.013	883.716	10.3673
2019-01-01 23:00:00	2.951	121.5	4.175	105.36	3.869	94.575	2.798	96.14	-11.945	883.636	10.8451
2019-01-01 23:15:00	3.104	151.786	3.257	107.444	2.798	89.694	2.645	96.35	-12.277	883.676	11.7783
2019-01-01 23:30:00	3.563	152.51	2.339	113.94	1.88	101.347	1.198	100.026	-11.755	883.516	11.5056
2019-01-01 23:45:00	3.257	141.437	3.563	115.64	2.798	107.367	1.574	99.371	-11.61	883.516	14.2257
2019-01-02 00:00:00	2.798	142.865	2.186	114.148	1.657	97.174	0.669	90.177	-11.827	883.477	15.2354
2019-01-02 00:15:00	0	109.956	2.798	114.303	2.951	96.642	2.492	94.51	-12.457	883.569	16.6595
2019-01-02 00:30:00	2.186	125.929	3.869	105.177	3.41	94.79	1.504	101.678	-12.223	883.343	18.8001
2019-01-02 00:45:00	0.223	3.208	0.223	95.775	1.727	90.625	3.104	91.1	-13.591	883.197	16.8752
2019-01-02 01:00:00	0	321.258	0	135.862	0	95.018	1.574	90.378	-14.232	883.09	15.1199
2019-01-02 01:15:00	1.045	288.427	0	114.237	0.822	106.256	1.198	93.995	-14.134	882.837	17.273
2019-01-02 01:30:00	0	245.519	0	141.807	0.669	97.813	1.727	102.982	-13.443	882.678	17.172
2019-01-02 01:45:00	0	274.452	0	135.253	0.446	116.18	1.115	98.48	-13.347	882.704	13.8903
2019-01-02 02:00:00	0	274.44	0.223	91.58	0.752	86.479	1.198	92.711	-13.344	882.784	12.8458
2019-01-02 02:15:00	0	171.859	0	76.014	0.223	86.205	0.223	97.535	-13.686	882.505	14.3911
2019-01-02 02:30:00	0	171.869	0	76.166	0.446	86.403	0.669	119.44	-13.849	882.624	14.4943
2019-01-02 02:45:00	0.223	139.773	0.446	97.943	1.88	100.242	1.88	112.193	-13.731	882.425	16.5236
2019-01-02 03:00:00	1.421	79.909	1.268	86.749	2.186	92.445	2.492	105.916	-14.11	882.425	20.5979
2019-01-02 03:15:00	0	79.923	0.892	109.867	2.186	112.566	2.645	122.456	-14.635	882.332	21.7496
2019-01-02 03:30:00	0	79.903	0.223	126.101	3.563	117.046	3.257	124.111	-14.815	882.186	22.469
2019-01-02 03:45:00	0.223	67.274	1.657	120.261	4.022	106.842	3.257	119.398	-14.479	882.173	22.2537
2019-01-02 04:00:00	0	3.491	1.198	113.198	2.798	113.569	3.41	114.857	-14.699	882.146	21.7997
2019-01-02 04:15:00	0	178.393	1.045	122.574	2.645	114.96	3.104	112.736	-14.838	881.96	18.2269
2019-01-02 04:30:00	0.223	311.546	0.376	106.767	2.339	103.871	2.798	102.23	-14.953	881.774	14.7229
2019-01-02 04:45:00	1.268	311.787	0.669	116.066	0.599	101.047	1.045	117.875	-15.492	881.614	9.92873
2019-01-02 05:00:00	1.421	291.933	1.115	116.049	0.669	89.325	0	105.147	-15.76	881.601	7.39547
2019-01-02 05:15:00	1.574	290.912	0	4.253	0.223	89.149	0	86.969	-15.641	881.388	5.8852
2019-01-02 05:30:00	1.268	279.135	0	4.249	0.223	89.132	0.669	285.631	-15.404	881.454	3.5092
2019-01-02 05:45:00	2.492	267.828	1.727	279.202	2.186	260.773	2.492	256.949	-14.977	881.495	1.37973
2019-01-02 06:00:00	3.104	272.94	2.798	279.284	2.645	272.363	2.798	268.765	-14.903	881.308	0.0152
2019-01-02 06:15:00	3.257	266.484	2.798	269.51	2.645	276.874	3.104	272.857	-14.564	881.295	0.0282
2019-01-02 06:30:00	2.339	277.523	2.339	293.933	2.645	276.211	1.88	285.188	-14.337	881.481	0.306267
2019-01-02 06:45:00	2.033	279.682	2.645	303.939	2.492	297.022	1.88	295.042	-14.256	881.494	0.0214
2019-01-02 07:00:00	2.186	265.47	2.645	286.007	2.492	288.809	1.574	284.582	-13.93	881.228	0.260333
2019-01-02 07:15:00	1.574	276.728	2.186	287.65	2.492	280.456	1.421	277.249	-13.608	881.308	0.188533
2019-01-02 07:30:00	1.727	262.051	1.88	266.421	1.421	280.076	0	277.222	-13.751	881.441	0.1596
2019-01-02 07:45:00	2.033	261.025	1.727	278.211	1.727	280.031	0.669	277.256	-13.507	881.428	0.0042
2019-01-02 08:00:00	2.339	263.048	2.798	272.242	2.951	273.412	1.574	282.727	-13.202	881.468	0.111933
2019-01-02 08:15:00	3.41	255.056	3.104	277.939	3.257	273.554	2.645	276.385	-13.202	881.934	0.796667
2019-01-02 08:30:00	3.41	263.398	4.175	276.754	3.869	267.681	3.563	271.49	-13.429	882.173	0.8396
2019-01-02 08:45:00	3.869	264.621	4.328	276.678	4.175	268.268	3.41	269.467	-14.642	882.173	0.795
2019-01-02 09:00:00	3.869	262.291	4.481	271.987	3.716	265.548	2.645	267.03	-15.753	882.186	1.07353
2019-01-02 09:15:00	2.951	272.205	3.716	281.303	3.716	272.306	3.257	274.596	-15.997	882.133	1.2224
2019-01-02 09:30:00	2.033	279.021	2.339	294.054	3.104	290.605	3.104	293.451	-15.977	882.345	0.306933
2019-01-02 09:45:00	2.186	270.013	2.033	290.191	2.492	287.148	2.645	293.316	-16.054	882.292	0
2019-01-02 10:00:00	2.186	262.462	1.88	280.403	2.186	279.538	2.186	291.706	-16.119	882.665	0
2019-01-02 10:15:00	2.645	250.456	1.88	280.249	2.033	283.215	1.88	297.76	-16.112	882.731	0
2019-01-02 10:30:00	2.798	252.469	2.339	273.416	2.033	277.41	1.88	286.276	-15.848	883.05	0
2019-01-02 10:45:00	2.645	245.019	1.88	276.547	1.574	273.218	1.421	291.219	-15.38	883.024	0
2019-01-02 11:00:00	1.727	246.582	1.115	277.753	0.892	276.19	0.223	301.076	-14.842	883.104	0
2019-01-02 11:15:00	0.669	238.886	0	267.296	0	278.348	0	286.803	-14.499	883.183	0
2019-01-02 11:30:00	0.223	214.981	0	220.311	0	278.343	0	286.804	-14.249	883.184	0
2019-01-02 11:45:00	0	166.727	0	220.272	0	278.304	0	286.67	-13.019	883.756	0
2019-01-02 12:00:00	0	166.352	0	206.036	0	278.346	0	286.7	-12.23	884.393	0
2019-01-02 12:15:00	0	49.674	0	139.035	0	278.534	0	14.393	-12.85	885.192	0
2019-01-02 12:30:00	0	49.827	0	94.544	0	4.313	0	37.456	-12.06	885.538	0
2019-01-02 12:45:00	1.351	81.449	0	83.272	0.669	41.394	0	58.873	-12.901	885.87	0
2019-01-02 13:00:00	0.223	86.431	0	79.72	0	56.353	0	72.061	-12.684	885.445	0
2019-01-02 13:15:00	0	76.463	0	79.717	0	56.332	0	72.057	-11.586	885.405	0
2019-01-02 13:30:00	0	331.699	0	236.764	0	257.734	0	215.823	-11.485	885.831	0
2019-01-02 13:45:00	1.198	264.158	0.223	269.085	1.045	247.013	1.351	250.157	-11.43	885.777	0
2019-01-02 14:00:00	1.88	284.628	1.727	264.1	1.727	257.123	2.033	249.59	-11.624	885.258	0
2019-01-02 14:15:00	1.88	299.472	2.033	290.653	2.339	268.657	2.186	267.121	-11.38	884.846	0
2019-01-02 14:30:00	1.574	314.199	0.669	306.893	2.033	294.567	1.351	287.777	-11.092	884.66	0
2019-01-02 14:45:00	2.186	284.522	1.727	344.767	2.033	326.917	1.421	320.101	-10.746	884.34	0
2019-01-02 15:00:00	1.574	275.015	1.88	332.346	2.033	322.929	1.727	256.024	-10.424	884.367	0
2019-01-02 15:15:00	1.88	339.777	2.339	328.199	2.951	313.083	2.339	308.867	-10.085	884.354	0.093133
2019-01-02 15:30:00	1.727	307.484	1.727	302.415	2.492	288.027	1.88	288.068	-9.567	884.433	1.53687
2019-01-02 15:45:00	2.645	296.371	3.104	299.565	3.41	291.218	3.716	289.645	-9.252	884.566	3.9954
2019-01-02 16:00:00	3.716	297.122	3.716	281.771	3.716	269.965	3.563	270.733	-8.876	884.393	6.05947
2019-01-02 16:15:00	3.41	276.043	3.563	277.196	4.175	264.535	3.869	271.309	-8.713	884.367	6.1874
2019-01-02 16:30:00	3.104	286.733	3.257	280.289	3.41	269.766	3.257	273.607	-8.585	884.261	5.16873
2019-01-02 16:45:00	3.563	309.829	3.563	310.475	3.869	294.821	3.869	294.621	-8.487	884.327	7.784
2019-01-02 17:00:00	4.787	308.596	5.093	304.662	4.94	288.999	4.328	290.493	-10.089	884.341	8.22813
2019-01-02 17:15:00	3.41	317.407	3.716	306.54	4.022	293.817	3.869	296.715	-10.576	884.38	8.865
2019-01-02 17:30:00	3.716	314.776	3.869	309.013	3.869	296.701	3.869	291.852	-10.743	884.42	6.259
2019-01-02 17:45:00	3.716	318.177	3.563	310.96	3.716	297.482	3.563	293.631	-10.963	884.221	3.88447
2019-01-02 18:00:00	2.798	312.093	2.951	294.956	2.951	286.65	2.951	284.061	-11.055	884.208	2.47393
2019-01-02 18:15:00	2.798	317.252	3.104	310.638	3.563	299.876	2.951	298.646	-11.295	884.447	2.2564
2019-01-02 18:30:00	2.339	326.744	2.645	309.908	2.798	298.288	2.645	298.872	-11.573	884.407	2.3332
2019-01-02 18:45:00	2.645	319.795	3.257	311.768	3.257	301.473	3.41	300.061	-11.922	884.447	2.6128
2019-01-02 19:00:00	2.339	311.113	2.645	304.249	2.798	293.801	2.492	294.025	-12.166	884.394	2.263
2019-01-02 19:15:00	1.268	314.508	2.339	303.107	2.186	289.46	2.645	278.026	-12.687	884.513	3.3654
2019-01-02 19:30:00	2.492	307.928	3.104	304.3	2.798	291.898	3.257	278.934	-12.985	884.407	4.70847
2019-01-02 19:45:00	2.033	304.441	2.645	303.352	2.492	292.44	2.492	291.246	-13.392	884.394	3.00253
2019-01-02 20:00:00	1.421	275.753	1.727	302.01	2.186	292.054	2.492	285.687	-13.727	884.606	1.79613
2019-01-02 20:15:00	2.645	266.034	2.798	280.118	2.033	275.769	2.186	200.325	-13.964	884.607	0.727933
2019-01-02 20:30:00	2.492	265.791	2.951	279.796	2.492	275.706	2.645	216.643	-14.022	884.58	0.352267
2019-01-02 20:45:00	1.727	266.317	2.645	276.325	2.645	268.025	2.033	220.553	-14.063	884.46	0
2019-01-02 21:00:00	0.892	276.172	1.88	285.217	2.339	268.201	2.645	237.919	-14.334	884.793	0
2019-01-02 21:15:00	1.045	290.953	2.186	295.612	2.645	283.589	2.951	270.246	-14.733	884.806	0
2019-01-02 21:30:00	0.446	294.574	1.88	300.422	2.186	284.639	2.492	288.795	-14.747	884.859	0
2019-01-02 21:45:00	0	294.612	0.669	298.22	1.268	284.895	1.574	296.406	-15.137	884.872	0
2019-01-02 22:00:00	0	294.609	0.892	309.649	1.268	297.475	1.88	309.418	-15.445	885.192	0
2019-01-02 22:15:00	0	294.603	0.669	328.189	2.339	319.8	2.339	320.152	-15.505	885.072	0
2019-01-02 22:30:00	0	294.639	0.223	330.956	0.669	319.91	1.727	327.606	-15.655	885.139	0
2019-01-02 22:45:00	0	323.835	0	321.559	0	319.588	0.223	311.69	-16.187	885.165	0
2019-01-02 23:00:00	0	323.83	0	321.534	0	319.616	0	307.693	-16.444	884.979	0
2019-01-02 23:15:00	0	238.306	0	259.64	0	319.576	0	307.649	-15.709	884.779	0
2019-01-02 23:30:00	0	218.116	0	259.662	0	319.702	0	307.713	-15.573	884.673	0
2019-01-02 23:45:00	1.268	89.903	1.268	111.38	0.223	320.069	0	103.207	-15.902	884.739	0
2019-01-03 00:00:00	1.88	95.028	1.574	111.222	1.574	55.149	1.115	103.147	-16.061	884.699	0
2019-01-03 00:15:00	1.421	110.578	1.574	108.189	1.88	77.336	1.421	103.151	-16.163	884.713	0
2019-01-03 00:30:00	1.88	114.62	1.574	105.528	1.88	86.271	1.88	95.433	-15.997	884.566	0
2019-01-03 00:45:00	1.268	140.932	0.892	104.251	1.421	86.583	0.892	103.69	-15.773	884.633	0
2019-01-03 01:00:00	0.669	139.128	0	104.277	1.115	86.601	0.669	104.564	-15.648	884.54	0
2019-01-03 01:15:00	0	138.094	0	108.9	0.892	97.525	0.223	97.83	-15.604	884.58	0
2019-01-03 01:30:00	1.115	114.374	1.115	106.447	0.892	94.533	0.892	97.4	-15.716	884.407	0
2019-01-03 01:45:00	1.198	92.85	1.268	92.289	1.268	79.004	1.268	80.151	-16.024	884.407	0
2019-01-03 02:00:00	0.223	92.845	0.446	93.038	0.223	77.749	0.446	80.649	-17.125	884.513	0
2019-01-03 02:15:00	0	92.876	0	93.03	0	77.802	0	80.698	-17.108	884.5	0
2019-01-03 02:30:00	0	92.867	0	93.031	0	77.803	0	80.675	-16.911	884.433	0
2019-01-03 02:45:00	0.446	274.677	0	92.964	0	77.77	0	80.666	-16.41	884.5	0
2019-01-03 03:00:00	0.892	274.896	1.268	301.174	1.115	314.219	0	75.416	-16.356	884.553	0
2019-01-03 03:15:00	0.223	280.202	0.223	301.216	0.446	299.666	0	350.631	-16.17	884.54	0
2019-01-03 03:30:00	0	280.224	0	301.402	0.446	299.689	0	332.145	-16.173	884.593	0
2019-01-03 03:45:00	0	280.241	0	301.372	0	299.701	0	332.161	-16.373	884.726	0
2019-01-03 04:00:00	0.223	261.103	0	301.298	0	299.526	0	317.554	-16.183	884.872	0
2019-01-03 04:15:00	1.045	251.167	0	300.775	0	299.271	0	284.454	-16.024	884.899	0
2019-01-03 04:30:00	1.421	255.137	0.669	279.374	0.446	299.256	0	284.553	-15.803	884.899	0
2019-01-03 04:45:00	2.492	252.129	2.492	265.741	2.186	259.672	1.88	265.644	-15.499	885.032	0
2019-01-03 05:00:00	3.41	246.23	3.104	260.999	2.492	259.694	1.88	267.181	-15.218	885.165	0
2019-01-03 05:15:00	3.257	249.684	3.257	267.05	3.257	252.928	2.798	256.552	-15.292	885.285	0
2019-01-03 05:30:00	2.186	248.418	2.798	278.845	2.033	268.397	2.186	270.629	-14.496	885.179	0
2019-01-03 05:45:00	1.88	86.579	0.223	282.531	0	272.424	0	268.003	-16.305	885.365	0
2019-01-03 06:00:00	1.115	97.73	0.669	181.074	0.892	272.278	0.223	268.217	-19.188	885.165	0
2019-01-03 06:15:00	2.339	115.723	2.645	116.109	2.645	84.201	1.421	117.597	-18.774	884.859	0
2019-01-03 06:30:00	3.104	131.093	2.798	116.077	2.798	108.308	1.88	109.157	-17.812	884.833	0
2019-01-03 06:45:00	2.186	129.357	2.645	121.798	2.492	110.385	2.186	107.973	-17.284	884.713	0
2019-01-03 07:00:00	0	121.319	0.669	118.866	1.268	111.368	1.574	104.968	-17.06	884.713	0
2019-01-03 07:15:00	0	106.298	1.727	102.897	1.574	109.267	1.421	104.49	-17.813	884.62	0
2019-01-03 07:30:00	0	168.049	1.421	93.077	1.421	85.302	1.574	99.353	-17.501	884.753	0
2019-01-03 07:45:00	0.892	103.532	1.421	95.533	1.727	82.174	1.421	94.675	-17.085	884.779	0
2019-01-03 08:00:00	0.446	94.859	1.115	103.9	0.446	85.327	0.892	100.198	-17.589	885.098	0
2019-01-03 08:15:00	0	94.908	0	103.855	0	85.374	0	99.725	-18.219	885.259	0
2019-01-03 08:30:00	0	94.922	0	103.89	0	85.391	0	100.008	-18.039	885.511	0
2019-01-03 08:45:00	0	183.515	0	103.894	0	87.18	0	100.12	-17.704	885.472	0
2019-01-03 09:00:00	0	183.4	0	103.89	0	92.419	0	105.786	-16.833	885.551	0
2019-01-03 09:15:00	0	183.368	0	123.795	0.446	93.081	1.115	119.299	-16.952	885.711	0
2019-01-03 09:30:00	0.669	101.1	1.268	116.781	0.892	100.619	1.574	118.272	-17.271	885.937	0
2019-01-03 09:45:00	1.198	97.043	1.268	113.288	1.045	105.723	0.892	127.565	-17.796	886.016	0
2019-01-03 10:00:00	1.727	97.807	1.88	79.375	1.574	99.477	1.115	126.682	-18.449	886.176	0
2019-01-03 10:15:00	0.669	115.697	1.115	99.502	0.892	95.794	1.268	96.568	-18.476	886.295	0
2019-01-03 10:30:00	0.892	115.123	0.446	100.544	0	95.645	0.752	96.089	-18.406	886.442	0
2019-01-03 10:45:00	0	115.153	0	100.442	0	93.763	0.223	101.133	-17.873	886.801	0
2019-01-03 11:00:00	0	114.959	0	101.98	0	94.625	0.223	100.937	-17.426	887.054	0
2019-01-03 11:15:00	0	24.402	0	101.852	0	94.519	0	89.714	-16.972	887.36	0.917667
2019-01-03 11:30:00	0	24.413	0	101.915	0	93.745	0.669	91.953	-16.109	887.573	1.06747
2019-01-03 11:45:00	0	24.39	0	101.92	0	93.751	0	97.827	-15.98	887.985	1.106
2019-01-03 12:00:00	0	324.512	0	193.78	0	93.806	0	103.073	-15.679	888.211	1.64527
2019-01-03 12:15:00	0	324.469	0	216.686	0	93.986	0	106.933	-15.275	888.33	2.1928
2019-01-03 12:30:00	0	324.637	0	216.693	0	94.028	0	119.02	-15.238	888.41	2.38933
2019-01-03 12:45:00	0	324.584	0	216.663	0	199.94	0	177.111	-14.564	888.357	1.17827
2019-01-03 13:00:00	0	324.568	0	215.756	0	199.897	0	151.054	-12.843	888.703	1.47453
2019-01-03 13:15:00	0	258.944	0	192.077	0	151.835	0	150.054	-12.125	889.062	1.85133
2019-01-03 13:30:00	0.223	189.605	0	208.206	0	109.638	0	117.232	-11.546	889.594	3.00427
2019-01-03 13:45:00	0	12.252	0	207.916	0	135.805	0	121.545	-9.923	889.754	4.2398
2019-01-03 14:00:00	0.223	26.234	0.822	32.935	0	116.953	0.669	130.517	-10.119	889.873	4.45853
2019-01-03 14:15:00	0	36.935	0	68.289	0	108.831	0.223	128.236	-9.598	889.608	6.15247
2019-01-03 14:30:00	0.223	32.475	0	68.297	0	108.863	0	132.485	-7.873	889.581	7.1248
2019-01-03 14:45:00	0.223	35.569	0.223	70.545	0.669	115.657	1.574	128.696	-7.436	889.661	6.7392
2019-01-03 15:00:00	1.045	33.296	0.892	62.031	1.045	85.123	1.727	109.003	-7.477	889.541	5.77847
2019-01-03 15:15:00	0.446	43.043	0.822	64.2	0.822	89.014	0.669	104.816	-6.739	889.581	5.03827
2019-01-03 15:30:00	0.446	44.796	0.223	94.205	0.599	95.933	1.88	107.742	-6.044	889.846	6.0904
2019-01-03 15:45:00	1.115	63.538	0.669	95.788	0.669	108.768	0.669	118.135	-5.082	889.594	6.9612
2019-01-03 16:00:00	1.045	69.039	1.727	98.999	2.033	99.599	1.504	109.21	-4.896	889.608	7.46107
2019-01-03 16:15:00	2.339	86.493	2.492	99.059	2.186	100.071	1.574	107.819	-4.005	889.528	7.98367
2019-01-03 16:30:00	3.104	127.293	2.186	110.508	2.492	88.257	2.339	101.15	-3.31	889.648	7.41307
2019-01-03 16:45:00	2.645	117.29	2.645	113.729	2.492	107.217	2.645	111.616	-3.148	889.448	6.39333
2019-01-03 17:00:00	2.492	137.317	2.186	131.482	2.951	118.353	1.657	123.436	-3.334	889.302	5.71927
2019-01-03 17:15:00	3.41	135.384	3.104	135.778	3.104	119.121	2.492	119.553	-3.375	889.342	4.99533
2019-01-03 17:30:00	2.798	143.942	2.645	136.63	3.257	136.517	2.339	132.723	-3.361	889.435	5.85293
2019-01-03 17:45:00	2.951	136.726	3.104	130.491	2.186	113.73	1.88	113.198	-3.426	889.208	6.72313
2019-01-03 18:00:00	2.951	130.526	2.798	116.79	2.492	106.986	1.88	121.415	-3.744	889.142	7.72047
2019-01-03 18:15:00	2.033	128.929	2.033	112.984	2.033	107.325	1.574	117.431	-3.975	889.089	10.6112
2019-01-03 18:30:00	2.339	125.402	3.257	105.316	2.951	95.622	2.339	96.959	-4.34	889.155	12.6871
2019-01-03 18:45:00	2.798	111.282	3.563	97.208	3.869	88.686	3.257	93.939	-5.265	888.876	12.6409
2019-01-03 19:00:00	3.257	123.078	4.175	103.323	4.328	89.902	4.175	92.1	-6.041	888.823	12.0483
2019-01-03 19:15:00	3.257	139.167	4.175	109.847	3.869	95.433	3.869	99.161	-6.312	888.73	15.5738
2019-01-03 19:30:00	2.492	121.16	4.175	104.16	4.328	93.386	4.175	95.813	-6.583	888.61	17.8305
2019-01-03 19:45:00	2.798	137.778	2.798	107.895	2.339	99.452	1.574	93.194	-6.939	888.636	21.8499
2019-01-03 20:00:00	0.446	114.105	2.492	108.19	3.104	91.405	2.645	92.339	-7.728	888.596	24.1733
2019-01-03 20:15:00	0	121.336	2.033	109.246	3.104	100.735	3.104	102.272	-8.263	888.703	24.0847
2019-01-03 20:30:00	0	138.856	1.88	117.518	2.339	106.302	2.492	112.454	-9.002	888.623	25.4788
2019-01-03 20:45:00	2.339	124.567	2.951	104.222	2.492	99.79	2.186	104.49	-8.693	888.397	26.2695
2019-01-03 21:00:00	3.257	143.165	3.257	124.566	2.951	129.614	1.88	118.198	-8.1	888.357	25.1705
2019-01-03 21:15:00	3.563	145.624	4.022	136.704	3.869	120.096	2.645	112.908	-8.087	888.423	26.1716
2019-01-03 21:30:00	3.563	136.272	4.94	126.336	3.41	120.257	2.645	118.33	-7.738	888.171	30.9477
2019-01-03 21:45:00	3.563	129.309	4.175	120.523	3.716	106.285	2.492	109.209	-7.955	888.078	39.3317
2019-01-03 22:00:00	4.481	128.573	3.563	125.36	3.716	123.934	2.951	113.512	-7.772	887.865	44.3245
2019-01-03 22:15:00	4.481	121.557	4.634	114.194	3.563	105.743	3.257	117.569	-7.907	887.719	51.0892
2019-01-03 22:30:00	4.328	129.812	5.093	111.808	4.328	113.578	3.104	115.968	-7.914	887.52	60.056
2019-01-03 22:45:00	4.481	129.686	5.093	118.14	3.563	109.723	3.104	114.011	-7.982	887.333	65.675
2019-01-03 23:00:00	4.94	133.488	5.093	117.632	4.634	109.637	2.645	114.42	-8.117	887.32	66.7929
2019-01-03 23:15:00	4.022	127.571	4.634	120.698	3.104	114.075	2.186	94.255	-7.938	887.12	71.3253
2019-01-03 23:30:00	2.339	100.494	3.104	111.884	3.257	99.439	3.257	109.795	-8.382	887.187	84.5827
2019-01-03 23:45:00	1.727	110.234	3.104	115.861	3.41	99.167	3.41	103.468	-9.141	887.014	96.241
2019-01-04 00:00:00	2.339	127.581	3.104	117.224	2.798	108.082	1.574	106.261	-8.768	886.734	97.1073
2019-01-04 00:15:00	3.41	118.422	3.716	114.737	3.104	105.657	2.645	101.581	-8.73	886.615	86.7021
2019-01-04 00:30:00	5.246	114.824	6.164	105.989	6.164	100.674	4.94	99.52	-8.788	886.362	75.8411
2019-01-04 00:45:00	6.317	122.042	7.694	114.093	7.235	103.517	6.776	103.23	-8.757	886.189	50.9469
2019-01-04 01:00:00	7.082	115.23	8.918	114.303	9.989	105.488	10.142	107.375	-8.673	886.016	57.2652
2019-01-04 01:15:00	7.388	119.972	9.377	113.188	11.213	103.201	12.59	106.903	-8.341	885.87	54.9917
2019-01-04 01:30:00	8.153	119.829	10.295	115.559	11.825	104.225	13.355	106.918	-8.107	885.658	66.9709
2019-01-04 01:45:00	8.765	126.327	10.907	114.033	10.754	104.945	10.754	107.717	-8.27	885.551	88.0157
2019-01-04 02:00:00	7.694	117.483	9.224	112.16	9.071	103.272	9.989	101.594	-8.409	885.591	108.349
2019-01-04 02:15:00	6.623	118.371	8.612	115.368	8.612	107.401	7.847	111.047	-8.517	885.564	127.738
2019-01-04 02:30:00	8.918	117.077	10.448	112.114	10.448	103.905	9.224	106.205	-8.609	885.245	149.208
2019-01-04 02:45:00	8	114.516	10.142	109.38	10.295	101.427	9.53	99.844	-8.74	885.458	153.11
2019-01-04 03:00:00	8.918	112.203	10.754	106.672	10.907	100.182	9.836	101.121	-8.626	885.245	142.079
2019-01-04 03:15:00	8	118.144	10.142	109.209	9.989	99.501	9.224	102.746	-8.636	885.125	136.331
2019-01-04 03:30:00	8.765	112.924	10.754	110.755	11.213	98.984	9.683	102.891	-8.578	885.032	134.311
2019-01-04 03:45:00	9.377	113.557	11.519	113.895	9.989	104.537	8.153	103.713	-8.375	885.125	137.195
2019-01-04 04:00:00	8.459	115.445	9.683	106.223	8.765	107.595	6.164	105.463	-8.588	884.966	140.886
2019-01-04 04:15:00	7.847	113.68	9.377	117.873	7.694	99.088	5.705	98.713	-8.507	884.939	140.919
2019-01-04 04:30:00	7.847	115.215	9.224	112.669	7.847	102.256	6.164	106.811	-8.466	884.966	137.977
2019-01-04 04:45:00	7.388	114.375	8.918	112.763	6.929	103.796	5.858	107.334	-8.531	884.926	136.314
2019-01-04 05:00:00	7.847	113.81	9.53	115.676	8.306	113.055	7.541	111.933	-8.71	884.766	136.026
2019-01-04 05:15:00	8.765	118.597	9.53	118.796	9.224	112.917	8	111.718	-8.795	884.327	141.737
2019-01-04 05:30:00	8.765	119.634	11.366	124.435	10.142	112.315	9.224	110.714	-8.29	884.141	145.069
2019-01-04 05:45:00	7.847	114.897	9.683	113.868	8.612	117.449	6.011	117.063	-8.68	884.208	145.711
2019-01-04 06:00:00	7.541	114.949	8.612	115.572	8	116.401	8.153	120.03	-8.876	883.862	141.619
2019-01-04 06:15:00	7.847	118.921	10.295	118.377	10.448	110.548	9.53	114.638	-9.035	883.583	135.672
2019-01-04 06:30:00	9.989	120.87	12.131	119.986	11.978	110.846	11.06	117.036	-8.368	883.37	135.263
2019-01-04 06:45:00	9.683	117.3	11.213	121.526	11.213	114.957	10.754	117.937	-9.079	883.223	134.125
2019-01-04 07:00:00	7.694	119.857	10.295	119.176	9.836	113.7	8.765	111.966	-8.859	883.263	134.344
2019-01-04 07:15:00	9.53	116.179	11.519	112.033	11.366	109.029	10.448	105.822	-9.266	883.064	133.635
2019-01-04 07:30:00	10.295	112.633	12.437	114.402	12.131	106.985	11.06	105.1	-10.109	882.851	134.729
2019-01-04 07:45:00	9.989	112.871	12.437	117.143	11.213	109.489	11.06	96.284	-10.16	882.758	137.201
2019-01-04 08:00:00	10.142	118.698	12.284	117.654	11.213	114.256	10.601	87.132	-10.289	882.664	127.455
2019-01-04 08:15:00	11.366	117.927	13.814	117.159	12.896	110.364	12.59	110.267	-10.407	882.598	119.554
2019-01-04 08:30:00	11.825	113.849	14.579	116.991	14.12	109.942	12.437	108.768	-10.763	882.625	119.717
2019-01-04 08:45:00	10.907	111.38	13.508	110.899	12.437	103.539	12.131	108.488	-10.753	882.598	126.797
2019-01-04 09:00:00	10.601	110.71	13.814	111.296	14.273	107.272	13.355	107.444	-10.726	882.359	121.556
2019-01-04 09:15:00	10.754	112.613	12.59	112.493	14.12	107.687	13.814	108.355	-10.969	882.558	119.938
2019-01-04 09:30:00	11.978	98.554	15.65	108.082	16.415	99.727	16.721	100.562	-10.397	882.319	114.042
2019-01-04 09:45:00	12.59	102.674	14.579	109.613	14.885	105.411	15.038	106.242	-10.797	882.239	105.752
2019-01-04 10:00:00	11.825	112.131	14.579	108.892	14.732	100.855	14.579	103.656	-10.682	882.266	103.147
2019-01-04 10:15:00	12.59	105.129	14.732	106.455	15.497	99.669	15.803	102.925	-10.421	882.532	93.4482
2019-01-04 10:30:00	11.978	121.947	14.885	118.503	14.885	110.058	14.732	109.401	-9.218	882.904	98.345
2019-01-04 10:45:00	11.519	117.29	14.273	120.842	14.426	112.428	15.344	117.614	-8.558	882.984	96.9562
2019-01-04 11:00:00	12.284	116.685	14.12	115.784	15.191	109.897	15.191	112.066	-8.29	883.104	92.3313
2019-01-04 11:15:00	13.355	113.067	15.344	113.601	16.415	106.092	16.721	111.468	-7.938	883.184	91.9782
2019-01-04 11:30:00	13.508	116.251	16.415	109.748	17.792	104.575	17.945	104.088	-7.402	883.21	97.7389
2019-01-04 11:45:00	13.508	109.259	16.721	108.929	17.18	97.007	17.792	101.216	-7.063	883.13	93.0639
2019-01-04 12:00:00	13.661	110.004	16.109	108.028	16.415	101.524	18.098	106.852	-6.952	883.037	90.1737
2019-01-04 12:15:00	14.12	114.129	16.415	107.87	17.639	102.432	18.71	101.621	-6.373	883.104	89.4445
2019-01-04 12:30:00	16.874	114.362	17.333	106.457	18.098	101.77	19.322	104.483	-6.081	882.798	90.2767
2019-01-04 12:45:00	14.885	110.123	16.721	110.051	17.333	99.511	18.251	102.1	-5.943	882.665	90.3763
2019-01-04 13:00:00	15.803	114.88	17.945	108.152	18.404	102.209	19.781	102.626	-5.851	882.625	88.9361
2019-01-04 13:15:00	17.333	112.873	19.169	111.351	19.934	101.901	20.087	104.668	-5.716	882.213	90.1209
2019-01-04 13:30:00	15.038	110.959	18.251	108.025	18.404	101.147	18.557	106.648	-5.543	881.761	89.9221
2019-01-04 13:45:00	14.579	112.859	17.333	109.161	18.098	100.389	18.863	103.561	-5.319	881.747	91.065
2019-01-04 14:00:00	16.568	110.075	18.404	108.439	19.628	101.053	19.169	102.623	-5.299	881.109	90.8497
2019-01-04 14:15:00	17.027	114.766	18.863	109.664	19.628	101.287	19.781	103.848	-5.187	880.936	90.8643
2019-01-04 14:30:00	16.262	110.635	18.251	108.924	18.251	101.426	19.628	101.915	-4.869	880.749	91.0519
2019-01-04 14:45:00	17.333	111.181	18.557	110.298	19.934	102.19	19.934	104.537	-4.774	880.457	92.3246
2019-01-04 15:00:00	15.803	111.221	16.874	108.321	17.792	101.152	18.863	102.663	-4.652	880.537	91.9012
2019-01-04 15:15:00	17.486	112.055	18.71	110.379	18.71	104.606	18.404	103.595	-4.74	880.045	90.7329
2019-01-04 15:30:00	16.874	109.088	18.863	108.648	19.322	105.117	19.475	102.882	-4.811	879.699	90.3723
2019-01-04 15:45:00	17.027	110.452	19.016	107.534	20.699	101.065	21.158	104.098	-5.194	879.513	89.9026
2019-01-04 16:00:00	17.792	115.488	18.557	110.443	20.087	101.709	20.699	105.743	-5.234	879.207	88.6978
2019-01-04 16:15:00	15.956	108.594	18.251	109.733	19.322	103.436	20.087	104.283	-5.59	879.18	88.5251
2019-01-04 16:30:00	16.874	105.425	18.71	107.222	19.475	100.535	20.24	101.967	-5.601	878.848	91.1085
2019-01-04 16:45:00	16.568	109.292	19.628	106.268	19.781	101.306	20.699	102.851	-5.688	878.874	90.9417
2019-01-04 17:00:00	14.426	111.027	17.18	107.033	19.169	100.59	20.546	103.076	-6.02	878.688	90.3021
2019-01-04 17:15:00	17.333	108.573	19.628	110.287	20.24	102.356	20.699	103.237	-6.109	878.462	90.6664
2019-01-04 17:30:00	15.65	109.17	19.322	108.586	20.699	101.472	20.546	103.072	-6.474	878.369	91.9842
2019-01-04 17:45:00	18.098	112.31	19.016	107.58	19.934	100.92	21.617	103.699	-6.847	878.037	90.6484
2019-01-04 18:00:00	16.874	110.966	19.475	111.349	20.699	102.415	21.311	102.613	-7.385	877.837	90.7361
2019-01-04 18:15:00	15.803	114.976	19.016	110.063	20.546	103.648	21.311	102.755	-7.829	877.598	90.2996
2019-01-04 18:30:00	15.803	116.579	18.251	108.953	19.781	104.15	20.393	104.295	-8.192	877.305	90.1107
2019-01-04 18:45:00	14.732	115.529	18.404	113.083	19.628	104.906	20.546	105.282	-8.385	877.132	90.4175
2019-01-04 19:00:00	15.191	108.584	17.18	113.05	18.557	108.565	19.322	105.448	-8.751	877.012	90.3525
2019-01-04 19:15:00	15.803	111.624	18.251	114.399	20.087	109.903	19.781	111.513	-8.849	876.893	90.9539
2019-01-04 19:30:00	15.65	114.75	17.333	112.012	19.781	108.406	19.934	107.448	-8.822	876.773	90.4837
2019-01-04 19:45:00	15.344	115.849	17.333	111.916	19.475	106.278	18.71	107.527	-8.822	876.694	90.3334
2019-01-04 20:00:00	14.579	114.925	18.404	110.92	19.934	106.251	19.628	105.088	-9.076	876.786	91.3847
2019-01-04 20:15:00	14.12	112.056	16.721	111.244	19.322	105.928	19.781	102.85	-9.005	876.76	90.5696
2019-01-04 20:30:00	14.732	111.893	17.639	108.957	19.628	105.719	19.322	107.616	-9.175	876.52	91.7035
2019-01-04 20:45:00	13.967	113.283	17.027	106.047	19.322	102.586	21.005	103.007	-9.15	876.494	94.2215
2019-01-04 21:00:00	15.191	109.869	17.639	107.739	18.863	101.234	19.934	102.582	-9.35	876.534	94.4192
2019-01-04 21:15:00	14.885	108.188	16.721	110.495	19.016	104.159	20.087	104.574	-9.429	876.64	94.1659
2019-01-04 21:30:00	13.967	108.059	16.874	108.95	19.016	102.101	20.393	103.579	-9.506	876.534	91.5949
2019-01-04 21:45:00	13.967	109.788	17.333	108.07	19.781	100.113	20.699	102.104	-9.652	876.361	91.2447
2019-01-04 22:00:00	13.202	110.654	16.874	105.102	18.251	98.709	20.24	100.972	-9.747	876.481	92.7979
2019-01-04 22:15:00	14.426	107.349	17.18	106.353	18.71	99.446	19.628	103.043	-9.757	876.414	92.4371
2019-01-04 22:30:00	15.191	105.375	17.18	109.183	18.863	102.242	19.781	104.655	-9.892	876.068	93.0435
2019-01-04 22:45:00	15.191	107.128	17.945	107.154	18.863	101.723	19.628	103.709	-9.767	876.042	103.019
2019-01-04 23:00:00	14.579	112.129	16.721	106.152	18.557	98.907	19.934	103.154	-9.689	876.188	99.3099
2019-01-04 23:15:00	13.661	107.394	17.027	104.113	19.016	97.392	20.852	99.644	-9.791	875.895	103.035
2019-01-04 23:30:00	15.344	114.026	17.027	104.714	18.71	98.436	20.699	99.171	-9.797	875.962	108.663
2019-01-04 23:45:00	14.273	107.623	17.333	102.437	18.251	96.32	20.087	100.762	-10.157	875.895	105.038
2019-01-05 00:00:00	13.967	108.859	16.721	105.673	17.333	99.632	19.169	101.685	-10.116	875.656	108.194
2019-01-05 00:15:00	12.743	110.95	16.415	107.209	17.486	99.343	19.016	101.912	-10.499	875.417	104.595
2019-01-05 00:30:00	13.967	107.821	16.568	104.446	17.792	97.844	18.863	102.775	-10.627	875.057	105.756
2019-01-05 00:45:00	12.284	107.19	14.732	109.174	16.568	100.319	18.098	102.842	-10.797	875.297	111.485
2019-01-05 01:00:00	10.601	103.256	12.743	104.123	14.426	97.518	16.109	101.801	-10.885	875.377	115.462
2019-01-05 01:15:00	9.989	111.698	11.672	108.938	12.59	99.213	14.12	100.931	-11.43	875.457	112.792
2019-01-05 01:30:00	9.53	110.337	11.825	106.391	13.202	100.787	13.355	103.459	-11.8	875.749	114.28
2019-01-05 01:45:00	9.53	114.373	11.366	107.322	11.366	95.75	13.202	99.159	-12.084	875.536	115.738
2019-01-05 02:00:00	8.153	109.98	10.601	107.237	11.978	98.584	12.896	100.051	-12.236	875.669	120.65
2019-01-05 02:15:00	8.612	106.891	10.601	107.787	11.519	98.439	12.59	98.773	-12.243	875.443	123.407
2019-01-05 02:30:00	8.459	115.995	10.142	107.014	11.213	97.522	11.672	101.329	-12.474	875.337	132.285
2019-01-05 02:45:00	8.765	116.518	10.448	107.529	11.519	100.974	12.131	83.271	-12.524	875.337	139.034
2019-01-05 03:00:00	8.459	113.47	10.601	107.59	10.907	96.976	10.601	69.796	-12.585	875.324	142.061
2019-01-05 03:15:00	8.459	116.184	9.683	108.758	9.53	103.062	8.612	107.103	-12.582	875.39	141.396
2019-01-05 03:30:00	7.541	116.567	8.306	103.907	6.929	99.647	5.093	96.889	-12.565	875.337	118.739
2019-01-05 03:45:00	6.317	117.265	5.705	112.59	5.399	95.559	4.634	108.169	-12.396	875.842	91.7575
2019-01-05 04:00:00	2.186	149.925	2.798	123.699	2.645	110.801	1.88	112.541	-13.148	876.135	60.1546
2019-01-05 04:15:00	3.104	152.062	2.645	147.268	2.339	117.675	1.198	110.956	-12.708	876.427	29.3173
2019-01-05 04:30:00	2.645	136.307	2.186	133.097	2.033	123.053	1.88	127.316	-12.193	876.76	15.6503
2019-01-05 04:45:00	3.257	209.214	2.645	178.277	1.281	146.746	1.574	154.121	-13.263	877.039	6.7574
2019-01-05 05:00:00	3.257	235.005	2.339	223.652	1.351	171.039	0.446	172.755	-13.236	876.853	0.5358
2019-01-05 05:15:00	3.41	241.779	3.257	256.099	2.645	234.54	2.186	217.439	-12.853	876.906	0
2019-01-05 05:30:00	3.41	253.61	3.563	258.565	3.41	244.85	2.492	241.285	-12.802	876.986	0.017933
2019-01-05 05:45:00	2.798	250.296	3.41	261.321	3.257	244.937	1.88	243.672	-12.738	876.959	0.1814
2019-01-05 06:00:00	2.186	321.498	2.951	290.334	2.492	268.577	2.645	272.957	-17.606	876.959	4.01367
2019-01-05 06:15:00	2.339	308.219	4.328	312.454	4.328	294.858	4.022	283.803	-17.311	877.066	6.27607
2019-01-05 06:30:00	2.186	283.703	3.257	297.004	3.716	281.407	3.563	276.612	-16.502	876.906	7.34973
2019-01-05 06:45:00	2.339	297.715	3.104	296.483	3.716	285.512	4.481	284.743	-15.712	877.225	8.98773
2019-01-05 07:00:00	3.104	272.935	4.022	273.601	3.716	271.224	3.716	277.951	-15.343	877.252	5.809
2019-01-05 07:15:00	2.186	272.401	3.563	263.09	3.716	258.94	3.104	270.497	-15.157	877.465	0.994467
2019-01-05 07:30:00	1.421	253.321	2.033	288.39	2.339	278.071	2.339	295.613	-15.329	877.731	0.812867
2019-01-05 07:45:00	0	313.68	0	298.933	0.223	287.93	0	281.249	-16.336	877.93	0.1844
2019-01-05 08:00:00	0.822	227.617	1.421	247.577	1.115	269.887	0.892	286.236	-15.329	877.85	0
2019-01-05 08:15:00	1.115	272.083	1.727	273.015	1.574	259.884	1.351	269.122	-14.347	878.17	0
2019-01-05 08:30:00	1.574	282.438	2.033	277.644	2.033	265.097	2.033	284.619	-13.802	878.303	0.302667
2019-01-05 08:45:00	2.645	268.946	2.798	283.075	2.951	276.256	3.104	284.932	-13.889	878.741	1.9534
2019-01-05 09:00:00	2.951	296.327	3.716	297.428	3.563	292.172	3.716	307.003	-13.954	878.887	2.67053
2019-01-05 09:15:00	2.033	323.883	2.951	325.911	3.104	308.768	2.798	302.651	-15.777	879.233	0.0096
2019-01-05 09:30:00	0	313.18	1.421	342.199	2.798	308.916	1.045	299.955	-16.989	879.273	0.0046
2019-01-05 09:45:00	0.446	256.434	0.223	339.024	0.223	299.888	0.599	282.55	-17.121	879.539	2.92247
2019-01-05 10:00:00	0.822	216.872	3.104	281.145	3.869	273.807	5.399	275.004	-15.953	879.473	9.77533
2019-01-05 10:15:00	4.022	288.098	5.246	292.012	5.705	285.107	5.399	288.755	-13.927	879.632	6.33073
2019-01-05 10:30:00	1.727	282.912	2.798	294.64	3.563	286.627	4.328	289.739	-13.873	880.125	3.84013
2019-01-05 10:45:00	2.269	233.408	2.951	290.941	3.257	287.828	3.563	292.708	-13.283	880.391	2.0482
2019-01-05 11:00:00	0.446	96.78	1.198	279.032	3.104	275.091	2.798	275.574	-15.37	880.67	2.60653
2019-01-05 11:15:00	0	96.768	2.339	284.671	3.104	281.075	3.104	282.336	-13.273	881.148	3.81727
2019-01-05 11:30:00	0	282.806	2.186	279.718	2.798	273.719	3.41	278.433	-11.623	881.601	3.35273
2019-01-05 11:45:00	0.669	209.469	2.186	303.311	4.022	289.49	5.093	289.057	-11.671	881.841	3.0012
2019-01-05 12:00:00	1.421	68.799	1.268	340.943	2.033	321.282	3.104	318.955	-11.349	881.987	3.86613
2019-01-05 12:15:00	0	69.835	1.198	334.382	2.798	317.967	3.41	316.507	-10.549	882.12	9.31513
2019-01-05 12:30:00	0.975	234.701	2.339	293.397	3.257	288.802	4.328	298.547	-9.025	882.558	23.2305
2019-01-05 12:45:00	6.011	307.962	6.47	301.221	6.317	295.517	7.235	296.512	-5.116	883.01	51.2364
2019-01-05 13:00:00	6.47	305.551	7.847	304.994	8.153	293.526	8.306	295.309	-5.36	883.277	73.5515
2019-01-05 13:15:00	6.623	309.882	7.847	304.34	7.694	294.468	8	295.257	-5.17	883.436	101.908
2019-01-05 13:30:00	7.847	309.872	9.071	310.101	8.918	297.49	8.765	299.142	-4.801	883.263	106.333
2019-01-05 13:45:00	8.918	305.48	9.377	307.479	9.224	300.855	10.448	299.692	-4.832	883.263	94.4679
2019-01-05 14:00:00	8.459	308.856	7.847	303.057	8.918	293.515	9.224	296.262	-4.496	883.343	91.7256
2019-01-05 14:15:00	8.612	304.87	9.53	300.576	9.377	290.702	9.989	295.973	-4.246	883.383	90.8699
2019-01-05 14:30:00	9.989	316.941	10.142	309.698	10.601	297.759	10.754	294.705	-4.313	883.29	91.285
2019-01-05 14:45:00	10.295	313.321	10.907	308.256	11.213	295.686	10.754	299.042	-4.174	883.396	90.6862
2019-01-05 15:00:00	9.683	311.738	11.366	308.474	10.907	300.212	11.519	301.462	-4.066	883.423	90.3947
2019-01-05 15:15:00	10.295	305.288	11.06	308.875	11.519	297.465	12.131	295.505	-4.14	883.543	90.7138
2019-01-05 15:30:00	10.295	307.194	11.519	300.877	11.519	292.029	11.825	293.358	-4.229	883.556	90.5334
2019-01-05 15:45:00	10.295	301.785	11.978	302.421	12.896	294.61	13.355	294.888	-4.133	883.503	91.0287
2019-01-05 16:00:00	10.295	296.776	11.213	296.906	10.907	288.905	11.672	292.446	-4.259	883.623	90.691
2019-01-05 16:15:00	10.448	300.594	11.06	302.545	11.672	291.31	11.825	291.282	-4.404	883.742	90.8669
2019-01-05 16:30:00	11.519	298.385	11.825	292.236	12.131	283.904	12.743	285.104	-4.628	883.769	90.6067
2019-01-05 16:45:00	10.907	295.984	11.978	294.429	12.59	283.85	12.284	286.771	-4.889	883.875	91.1552
2019-01-05 17:00:00	10.601	293.114	12.284	302.693	11.978	290.344	12.284	292.219	-5.042	883.915	91.7496
2019-01-05 17:15:00	9.377	295.933	9.989	293.79	10.601	288.892	10.907	288.747	-4.98	884.075	91.0018
2019-01-05 17:30:00	10.448	291.539	10.448	290.876	11.213	283.511	11.366	288.318	-5.092	884.141	91.3393
2019-01-05 17:45:00	8.918	294.291	10.142	295.326	10.295	280.779	10.907	283.106	-5.536	884.314	91.4415
2019-01-05 18:00:00	9.377	290.279	10.448	290.536	10.601	282.067	11.519	286.025	-5.956	884.221	90.7943
2019-01-05 18:15:00	10.142	292.082	12.131	288.262	13.202	282.345	13.508	284.47	-6.173	883.915	90.0451
2019-01-05 18:30:00	10.142	292.422	11.978	283.995	13.355	278.113	13.508	281.586	-6.373	884.168	90.2346
2019-01-05 18:45:00	11.06	279.473	11.366	279.472	12.896	271.068	12.896	273.33	-6.661	884.168	90.7095
2019-01-05 19:00:00	10.754	284.148	11.519	281.776	11.825	266.229	12.59	271.423	-6.752	884.327	90.93
2019-01-05 19:15:00	10.754	283.052	11.978	278.8	12.437	268.647	13.049	271.317	-6.661	884.433	91.8816
2019-01-05 19:30:00	11.213	278.137	13.661	278.457	13.661	270.583	14.273	272.236	-6.83	884.58	91.327
2019-01-05 19:45:00	9.836	281.556	11.06	276.524	11.978	269.103	13.661	271.033	-6.806	884.899	91.1731
2019-01-05 20:00:00	10.601	286.105	11.519	279.455	12.437	269.775	13.355	273.199	-6.789	884.979	91.6349
2019-01-05 20:15:00	9.071	285.409	10.907	286.809	12.437	275.665	12.59	277.676	-6.86	885.418	90.6467
2019-01-05 20:30:00	9.989	293.378	11.06	284.905	11.825	273.798	11.978	276.226	-6.684	885.432	91.6792
2019-01-05 20:45:00	9.989	294.336	11.978	290.771	12.437	281.87	13.202	282.052	-6.83	885.804	91.7491
2019-01-05 21:00:00	9.53	298.591	11.213	293.742	11.519	281.21	12.743	282.843	-7.148	885.963	91.0393
2019-01-05 21:15:00	10.448	299.879	11.213	290.245	10.907	278.307	11.519	281.378	-6.901	885.937	91.3661
2019-01-05 21:30:00	10.295	293.642	12.131	286.066	12.896	280.642	13.355	282.973	-6.674	886.123	90.4472
2019-01-05 21:45:00	10.754	294.663	11.519	287.017	11.672	279.684	12.284	280.378	-6.61	886.428	90.0163
2019-01-05 22:00:00	9.989	296.47	11.213	287.37	12.131	278.227	12.131	280.322	-6.755	886.588	90.911
2019-01-05 22:15:00	8.612	298.352	10.448	284.519	10.601	275.413	11.825	278.892	-7.074	886.668	90.6915
2019-01-05 22:30:00	8.612	300.457	11.366	292.499	11.366	283.444	12.437	284.665	-7.585	886.654	90.4839
2019-01-05 22:45:00	8.306	302.248	10.601	297.782	11.519	285.732	11.825	286.107	-8.317	886.748	91.9559
2019-01-05 23:00:00	8	306.151	10.448	299.971	10.448	288.888	11.519	287.714	-9.201	886.761	92.3854
2019-01-05 23:15:00	8	306.376	10.142	302.812	10.295	290.174	11.213	291.221	-9.567	886.562	92.854
2019-01-05 23:30:00	9.071	302.978	10.754	300.242	11.06	291.492	11.825	290.375	-9.418	886.708	91.5719
2019-01-05 23:45:00	8.918	294.93	11.06	295.156	12.284	290.282	13.202	293.907	-9.059	886.641	92.3906
2019-01-06 00:00:00	9.071	294.667	11.06	299.238	12.131	292.011	12.743	291.537	-9.174	886.987	93.1468
2019-01-06 00:15:00	9.683	295.467	11.06	296.865	11.825	287.336	12.284	291.177	-9.51	886.947	93.1264
2019-01-06 00:30:00	6.929	278.918	8.918	284.631	9.53	278.614	10.142	283.939	-9.787	887.453	93.4174
2019-01-06 00:45:00	8.765	289.11	9.836	282.867	10.601	273.248	10.907	276.332	-9.835	887.28	93.6784
2019-01-06 01:00:00	8.612	283.791	9.377	283.807	10.448	275.259	11.825	273.409	-10.045	887.466	93.3973
2019-01-06 01:15:00	9.224	281.357	10.448	277.991	11.06	272.09	11.825	275.621	-10.028	887.48	90.9933
2019-01-06 01:30:00	8.765	286.811	10.142	280.913	11.366	272.665	11.825	273.226	-10.082	887.693	91.6261
2019-01-06 01:45:00	9.836	288.057	11.213	285.013	12.437	276.311	12.896	279.622	-10.119	887.679	90.967
2019-01-06 02:00:00	8.153	287.983	9.377	285.875	9.683	276.177	10.448	279.466	-10.187	887.865	91.3026
2019-01-06 02:15:00	8.459	291.586	9.683	288.674	10.754	280.787	10.448	281.977	-10.048	888.33	90.5499
2019-01-06 02:30:00	9.53	293.933	10.142	285.096	11.213	276.849	11.825	279.854	-10.136	888.224	91.8698
2019-01-06 02:45:00	8.459	288.374	9.53	286.243	9.989	276.945	11.06	276.843	-10.038	888.583	91.9331
2019-01-06 03:00:00	9.53	283.097	10.907	282.191	11.519	273.643	11.978	276.055	-10.17	888.769	91.6109
2019-01-06 03:15:00	9.989	285.055	11.366	289.476	11.978	277.563	12.437	280.974	-10.242	889.076	91.3077
2019-01-06 03:30:00	9.53	295.465	9.836	291.235	10.295	281.65	10.601	282.529	-10.431	889.248	91.5203
2019-01-06 03:45:00	9.53	287.895	10.448	285.692	11.213	277.124	12.284	279.159	-10.624	889.435	91.5623
2019-01-06 04:00:00	9.377	296.391	10.448	288.611	11.06	280.671	11.978	277.094	-10.712	889.581	92.071
2019-01-06 04:15:00	10.754	291.599	11.672	286.746	12.59	277.692	13.049	279.974	-10.394	889.634	91.5531
2019-01-06 04:30:00	9.53	294.676	10.907	288.553	10.907	280.37	11.825	284.459	-10.458	889.674	90.0822
2019-01-06 04:45:00	9.224	287.074	11.213	290.315	11.825	280.72	12.59	281.851	-10.767	889.541	91.2724
2019-01-06 05:00:00	8.153	282.867	8.918	285.242	9.836	277.096	10.448	277.177	-10.936	889.846	92.2888
2019-01-06 05:15:00	8.306	288.527	9.683	282.373	10.448	275.217	10.907	277.97	-11.36	889.807	90.9307
2019-01-06 05:30:00	8.612	287.294	10.142	285.57	10.295	277.825	10.754	279.084	-11.556	889.714	90.8945
2019-01-06 05:45:00	8.153	283.194	9.377	284.876	9.377	275.26	9.683	273.819	-11.444	889.608	90.9065
2019-01-06 06:00:00	7.694	297.491	8	290.857	8.765	276.073	9.224	272.201	-11.525	889.82	91.1161
2019-01-06 06:15:00	8.459	296.342	9.071	291.243	9.224	279.395	9.683	278.337	-11.62	889.555	90.5997
2019-01-06 06:30:00	7.847	291.419	8.918	290.869	9.224	280.518	9.224	276.849	-11.789	889.608	90.4571
2019-01-06 06:45:00	8	300.575	9.071	296.508	9.683	284.421	10.448	280.024	-11.83	889.528	91.2499
2019-01-06 07:00:00	7.541	288.855	8.612	286.841	9.071	276.784	9.377	278.244	-12.016	889.475	91.9066
2019-01-06 07:15:00	9.224	286.776	9.224	285.64	9.836	278.076	10.295	277.624	-12.081	889.501	91.2411
2019-01-06 07:30:00	7.694	283.003	8.612	285.294	10.142	276.36	11.06	277.546	-11.684	889.448	87.2466
2019-01-06 07:45:00	8.459	290.961	9.836	288.623	11.06	281.774	11.672	281.486	-11.542	889.608	84.2749
2019-01-06 08:00:00	7.847	290.502	9.53	283.466	10.754	276.284	12.437	275.694	-11.569	890.006	83.7117
2019-01-06 08:15:00	8.306	282.854	9.989	284.907	11.672	276.517	12.131	276.054	-11.146	890.006	90.4006
2019-01-06 08:30:00	7.235	286.096	8.306	285.348	9.071	280.697	9.836	275.41	-10.851	890.339	90.6761
2019-01-06 08:45:00	7.541	296.337	8.612	290.669	8.612	280.064	9.53	278.925	-10.448	890.738	91.007
2019-01-06 09:00:00	7.235	291.251	7.694	286.311	8.306	279.553	9.53	276.324	-10.146	890.844	92.3925
2019-01-06 09:15:00	8.306	292.206	9.071	287.797	10.295	275.068	9.989	276.455	-10.133	891.097	97.7545
2019-01-06 09:30:00	8.765	296.97	9.836	295.77	10.142	285.496	11.213	283.986	-10.197	891.044	105.101
2019-01-06 09:45:00	9.224	297.915	11.06	297.887	11.213	284.812	11.978	285.251	-10.567	891.204	124.608
2019-01-06 10:00:00	7.541	287.128	8.918	286.671	9.224	277.146	9.836	275.577	-10.949	891.23	137.904
2019-01-06 10:15:00	8.765	281.293	9.224	279.997	9.683	269.889	9.836	269.778	-11.004	891.297	130.784
2019-01-06 10:30:00	6.929	281.82	8.153	279.264	8.765	269.29	9.377	270.394	-10.902	891.696	114.251
2019-01-06 10:45:00	7.388	282.285	8.612	276.97	9.224	269.68	9.53	273.817	-10.794	892.028	116.018
2019-01-06 11:00:00	8.918	277.457	9.377	282.404	10.142	273.852	9.836	250.94	-10.902	892.254	114.039
2019-01-06 11:15:00	7.388	282.035	8.459	283.333	8.765	274.097	8.765	254.087	-10.278	892.334	109.449
2019-01-06 11:30:00	5.552	286.876	6.47	279.703	7.694	272.642	8.612	279.54	-9.242	892.72	96.8671
2019-01-06 11:45:00	6.776	283.045	6.776	282.037	7.847	272.776	8.765	256.036	-7.785	893.026	90.944
2019-01-06 12:00:00	7.541	282.157	8.612	279.795	8.918	271.096	8.765	237.353	-7.067	893.292	86.5741
2019-01-06 12:15:00	7.388	283.564	8	280.252	8.459	272.139	8.765	275.069	-6.83	893.597	74.115
2019-01-06 12:30:00	8.306	282.425	9.53	277.769	10.142	272.014	11.213	271.106	-6.816	893.637	65.5355
2019-01-06 12:45:00	7.082	280.525	7.235	280.039	8	268.197	8.459	269.257	-6.265	893.61	57.3899
2019-01-06 13:00:00	7.235	294.018	8.306	290.412	8.153	276.97	8.306	275.263	-5.861	893.677	54.2313
2019-01-06 13:15:00	7.082	303.477	7.541	290.197	8	274.286	8	275.277	-5.682	893.65	54.0253
2019-01-06 13:30:00	5.858	293.87	6.776	288.744	7.388	276.89	7.847	277.803	-5.617	893.677	53.9007
2019-01-06 13:45:00	6.929	298.771	7.694	289.843	7.235	277.096	7.541	280.351	-5.394	893.398	57.9503
2019-01-06 14:00:00	5.705	287.977	6.776	279.291	7.235	266.024	7.541	273.182	-4.842	893.384	65.9317
2019-01-06 14:15:00	5.705	287.977	6.776	279.291	7.235	266.024	7.541	273.182	-4.842	893.384	65.9317
2019-01-06 14:30:00	5.705	287.977	6.776	279.291	7.235	266.024	7.541	273.182	-4.842	893.384	65.9317
2019-01-06 14:45:00	5.705	287.977	6.776	279.291	7.235	266.024	7.541	273.182	-4.842	893.384	65.9317
2019-01-06 15:00:00	7.388	285.989	8	281.905	7.847	273.906	8	272.95	-4.753	892.587	91.4954
2019-01-06 15:15:00	7.388	285.989	8	281.905	7.847	273.906	8	272.95	-4.753	892.587	91.4954
2019-01-06 15:30:00	7.388	285.989	8	281.905	7.847	273.906	8	272.95	-4.753	892.587	91.4954
2019-01-06 15:45:00	7.388	285.989	8	281.905	7.847	273.906	8	272.95	-4.753	892.587	91.4954
2019-01-06 16:00:00	8.765	281.938	9.071	275.849	9.683	273.103	9.836	271.308	-4.679	892.467	94.6944
2019-01-06 16:15:00	8.765	279.731	9.071	282.07	9.377	275.458	9.836	274.911	-4.963	892.187	93.5659
2019-01-06 16:30:00	8	284.549	8.459	280.823	9.071	270.732	9.683	272.975	-5.475	892.134	91.7515
2019-01-06 16:45:00	7.235	290.485	7.388	280.014	8.306	271.281	8.306	271.99	-5.651	892.267	91.6789
2019-01-06 17:00:00	7.082	271.352	8.459	272.264	8.918	264.515	9.53	268.319	-6.088	892.201	91.3622
2019-01-06 17:15:00	8.612	281.187	8.612	273.118	8.765	263.201	9.377	264.601	-6.305	892.028	90.3061
2019-01-06 17:30:00	7.847	282.775	8.612	278.699	9.224	269.411	9.53	269.485	-6.318	891.908	94.9593
2019-01-06 17:45:00	8.153	283.957	9.224	278.08	9.989	267.983	9.683	268.892	-6.59	891.948	104.698
2019-01-06 18:00:00	8.459	292.455	9.224	285.282	9.377	273.388	9.836	273.842	-7.277	891.961	103.228
2019-01-06 18:15:00	7.694	280.515	9.377	278.631	9.071	271.616	8.918	271.534	-7.663	891.629	106.037
2019-01-06 18:30:00	7.235	277.151	8.153	276.387	8.918	266.25	9.377	269.823	-8.185	891.456	125.463
2019-01-06 18:45:00	7.388	279.675	8.612	280.829	8.765	271.169	9.224	272.904	-8.399	891.443	133.946
2019-01-06 19:00:00	6.776	270.829	8	279.224	8.612	267.223	9.224	268.942	-8.727	891.27	105.751
2019-01-06 19:15:00	6.164	278.397	8.306	279.375	9.53	268.692	9.683	269.647	-8.317	891.031	55.5701
2019-01-06 19:30:00	6.164	279.699	8.459	276.281	9.071	266.128	9.683	268.235	-6.671	890.977	26.4815
2019-01-06 19:45:00	6.623	285.027	8.918	279.827	9.224	269.429	9.836	270.9	-5.926	891.35	19.7303
2019-01-06 20:00:00	4.634	311.12	5.705	302.456	7.388	293.116	8	285.278	-6.711	891.749	9.3518
2019-01-06 20:15:00	3.563	347.36	5.552	318.445	4.328	303.835	4.94	291.033	-9.967	891.802	3.89753
2019-01-06 20:30:00	1.351	196	0.529	303.093	0.892	287.119	0.223	283.522	-10.028	891.935	3.11333
2019-01-06 20:45:00	0.599	75.021	0.975	57.573	1.88	106.567	1.574	177.407	-10.668	892.081	4.61913
2019-01-06 21:00:00	2.339	207.516	2.492	262.506	3.257	268.734	3.41	271.423	-10.763	891.948	3.93887
2019-01-06 21:15:00	1.574	267.04	3.257	293.537	4.022	286.861	4.787	293.609	-10.458	891.708	3.84207
2019-01-06 21:30:00	3.257	274.967	3.41	284.267	4.175	281.813	4.328	288.059	-10.753	891.815	1.2336
2019-01-06 21:45:00	2.798	270.906	3.257	282.262	3.41	281.524	3.716	286.445	-10.81	891.735	0.043
2019-01-06 22:00:00	0.446	271.709	1.727	284.094	1.727	288.787	1.88	295.497	-11.034	891.576	0
2019-01-06 22:15:00	0	269.242	0	272.055	0.223	288.772	0	294.581	-11.119	891.589	0
2019-01-06 22:30:00	1.727	128.41	1.268	160.192	0.892	288.923	0.669	294.768	-10.949	891.789	0
2019-01-06 22:45:00	2.645	143.311	2.033	115.007	2.339	107.862	1.88	106.771	-10.702	891.682	0
2019-01-06 23:00:00	3.257	115.764	3.257	98.676	2.492	77.148	2.492	102.659	-12.105	891.855	0
2019-01-06 23:15:00	0.892	102.781	0.223	59.662	0.446	43.108	0.669	48.852	-12.551	891.642	0
2019-01-06 23:30:00	2.492	118.195	2.798	112.611	2.339	109.828	1.574	95.335	-12.721	891.748	0
2019-01-06 23:45:00	2.492	123.188	2.339	109.942	2.492	105.955	2.492	83.306	-13.223	891.416	0
2019-01-07 00:00:00	2.645	135.6	2.492	113.105	2.339	101.657	2.492	89.256	-12.88	891.443	0
2019-01-07 00:15:00	2.645	142.049	1.421	74.157	0.822	39.436	1.574	40.853	-12.674	891.376	0.025733
2019-01-07 00:30:00	1.574	160.932	0.223	80.331	0	45.752	0	71.506	-12.471	891.403	0.008533
2019-01-07 00:45:00	0	134.348	0	80.172	0	45.678	0.446	66.66	-12.447	891.443	0.013933
2019-01-07 01:00:00	0	133.729	0	80.188	0	45.741	0	66.587	-13.002	891.244	0.024933
2019-01-07 01:15:00	0	45.703	0	80.224	0	45.75	0	66.659	-14.276	891.19	0.535
2019-01-07 01:30:00	1.198	70.489	1.351	80.188	0.669	45.735	0	66.644	-14.506	890.871	0.189067
2019-01-07 01:45:00	0	97.404	0	80.335	0.223	47.728	0	66.681	-14.997	890.725	0
2019-01-07 02:00:00	0	97.404	0	80.26	0	47.724	0	77.146	-14.852	890.459	0
2019-01-07 02:15:00	0	97.404	0	80.209	0	47.797	1.574	77.062	-14.76	890.379	0
2019-01-07 02:30:00	0	97.404	0	80.267	0	47.734	0	63.911	-14.723	890.033	0
2019-01-07 02:45:00	0	97.404	0	80.255	0	47.724	0	61.231	-15.041	890.006	0
2019-01-07 03:00:00	0	97.41	0	80.23	0	47.761	0	109.883	-15.204	889.979	0
2019-01-07 03:15:00	0	97.393	0	80.225	0	47.708	0	108.514	-15.106	889.873	0
2019-01-07 03:30:00	0	97.393	0	80.199	0	47.708	0	103.174	-14.97	890.019	0
2019-01-07 03:45:00	0	97.409	0	80.225	0	47.718	0	77.601	-15.329	889.807	0
2019-01-07 04:00:00	0	97.404	0	80.256	0	47.712	0	67.746	-15.295	889.78	0
2019-01-07 04:15:00	0	97.43	0	80.66	0	80.954	1.727	68.055	-15.394	889.674	0.034333
2019-01-07 04:30:00	0	97.409	0	92.541	0	83.923	0.892	72.063	-14.859	889.461	0.661133
2019-01-07 04:45:00	0	97.409	0	92.599	0	84.269	1.574	76.154	-15.425	889.448	1.46387
2019-01-07 05:00:00	0	97.037	0	92.573	0	84.233	0	67.788	-15.482	889.355	2.59153
2019-01-07 05:15:00	0	96.995	0	92.578	0	84.233	0	84.353	-15.78	889.116	3.04413
2019-01-07 05:30:00	0	97.034	0	92.578	0	84.238	0	105.089	-16.288	888.823	4.90287
2019-01-07 05:45:00	0	97.026	0	92.567	0	84.227	0	102.277	-16.349	888.836	6.03927
2019-01-07 06:00:00	0	97.226	0	92.583	0	84.238	0	80.424	-16.458	888.476	8.25127
2019-01-07 06:15:00	0	137.711	0	92.583	0	84.233	0	68.874	-16.231	888.078	12.3759
2019-01-07 06:30:00	0	137.695	0	92.588	0	84.227	0	61.535	-16.407	888.011	15.4816
2019-01-07 06:45:00	0	137.685	0	92.578	0	84.238	0	30.691	-16.471	887.772	18.8569
2019-01-07 07:00:00	0	137.621	0	92.583	0	84.238	0	69.639	-16.633	887.693	20.2214
2019-01-07 07:15:00	0	137.621	0	92.583	0	84.222	0	85.843	-17.044	887.533	24.3375
2019-01-07 07:30:00	0	137.653	0	92.583	0	84.227	0	94.005	-17.525	887.214	31.0469
2019-01-07 07:45:00	0	137.673	0	92.575	0	84.229	0	96.151	-17.68	887.041	40.7787
2019-01-07 08:00:00	0	137.687	0	92.572	0	84.244	0	102.49	-17.264	886.921	46.6858
2019-01-07 08:15:00	0	137.685	0	92.578	0	93.997	0	96.79	-17.284	886.961	48.3449
2019-01-07 08:30:00	0	137.687	0	92.618	0	95.495	0	84.39	-17.328	887.001	51.0718
2019-01-07 08:45:00	0	137.956	0	92.602	0	98.051	0.822	86.735	-17.237	886.841	51.5326
2019-01-07 09:00:00	0	137.886	0	132.87	0	106.066	2.033	81.413	-17.369	886.868	57.3907
2019-01-07 09:15:00	0	289.894	0.446	127.895	0.223	96.702	1.81	82.419	-17.626	886.774	65.4356
2019-01-07 09:30:00	0.669	271.346	0.446	127.106	0.446	80.854	3.716	82.09	-17.829	886.721	78.6823
2019-01-07 09:45:00	0.223	283.081	0	66.935	0.446	77.754	3.104	75.476	-17.078	886.681	81.5615
2019-01-07 10:00:00	0	275.174	0	85.952	0.599	75.445	2.645	80.541	-17.047	886.721	89.6112
2019-01-07 10:15:00	0	328.798	1.504	97.657	4.94	95.522	5.858	81.477	-15.502	886.721	99.2186
2019-01-07 10:30:00	1.657	153.393	4.787	111.196	5.858	108.029	4.481	79.307	-14.194	887.014	99.1471
2019-01-07 10:45:00	6.011	119.817	7.235	114.591	5.399	100.855	4.328	77.887	-10.949	887.732	85.1309
2019-01-07 11:00:00	6.317	119.212	7.235	118.845	6.623	109.738	6.317	89.009	-10.79	888.211	68.215
2019-01-07 11:15:00	6.929	118.999	8	116.724	8.306	107.899	8.306	89.335	-10.065	888.424	60.3087
2019-01-07 11:30:00	8.918	117.459	10.295	113.466	11.213	102.563	12.131	91.431	-9.354	888.583	48.7261
2019-01-07 11:45:00	10.295	116.123	12.131	112.532	13.202	100.658	14.12	87.652	-8.385	888.676	44.4928
2019-01-07 12:00:00	11.213	112.644	13.049	109.847	13.967	100.741	14.579	78.088	-7.707	888.743	59.7911
2019-01-07 12:15:00	12.59	111.017	14.732	107.766	14.732	99.447	15.038	82.591	-6.966	888.649	78.1789
2019-01-07 12:30:00	14.12	112.808	14.732	112.96	15.956	100.255	16.721	88.306	-6.407	888.916	95.9007
2019-01-07 12:45:00	14.426	116.532	14.732	108.804	15.497	102.204	15.497	91.766	-6.132	888.916	96.1746
2019-01-07 13:00:00	12.896	113.382	15.344	109.685	15.803	101.673	16.109	89.097	-5.692	888.836	90.935
2019-01-07 13:15:00	13.661	119.026	15.038	113.374	15.038	102.973	15.65	90.054	-5.431	888.73	87.0953
2019-01-07 13:30:00	12.896	116.795	15.191	112.215	15.191	103.797	15.497	93.24	-5.265	888.689	95.1097
2019-01-07 13:45:00	14.12	115.598	16.109	113.403	16.415	103.973	17.027	92.563	-5.309	888.264	86.9167
2019-01-07 14:00:00	14.426	120.713	15.344	110.789	15.803	101.846	16.721	90.504	-4.974	887.719	94.0458
2019-01-07 14:15:00	13.661	115.334	15.344	110.112	15.956	104.901	15.497	91.227	-4.798	887.679	94.9794
2019-01-07 14:30:00	14.273	112.151	14.885	114.492	15.191	105.155	15.803	94.413	-4.679	887.227	89.102
2019-01-07 14:45:00	13.814	111.882	14.885	109.112	15.956	101.417	15.803	91.036	-4.547	886.974	90.7577
2019-01-07 15:00:00	12.284	112.527	15.038	110.234	15.038	106.437	15.497	93.142	-4.435	886.908	90.1095
2019-01-07 15:15:00	12.437	107.989	14.885	111.065	16.109	102.142	16.109	91.384	-4.235	886.708	96.2301
2019-01-07 15:30:00	13.355	110.75	15.956	104.973	16.262	98.565	16.568	88.24	-4.554	886.428	101.65
2019-01-07 15:45:00	13.814	115.403	16.109	106.836	16.415	98.493	17.027	90.184	-4.645	886.242	78.2146
2019-01-07 16:00:00	14.579	107.791	16.109	109.161	16.721	98.875	17.486	89.075	-4.936	886.256	47.9999
2019-01-07 16:15:00	15.038	106.881	17.333	107.418	17.792	99.724	17.333	90.724	-4.953	886.07	42.1805
2019-01-07 16:30:00	15.956	111.821	17.639	107.125	18.098	101.232	18.404	92.4	-5.021	885.817	58.0074
2019-01-07 16:45:00	14.579	107.795	16.109	104.096	17.18	97.1	17.945	88.464	-5.089	885.724	70.0639
2019-01-07 17:00:00	13.661	107.261	16.262	105.278	16.262	100.302	17.333	91.516	-4.93	885.95	88.2882
2019-01-07 17:15:00	12.437	107.282	14.579	107.108	16.721	99.795	17.333	90.584	-4.879	885.764	100.018
2019-01-07 17:30:00	12.896	109.321	15.344	107.914	15.956	102.61	16.721	92.229	-5.234	885.591	105.818
2019-01-07 17:45:00	14.273	115.654	15.191	110.223	16.109	101.66	17.639	95.165	-5.509	885.431	103.847
2019-01-07 18:00:00	11.978	115.769	14.12	116.348	16.109	108.633	18.098	96.062	-6.268	885.565	98.132
2019-01-07 18:15:00	12.284	120.91	15.038	116.343	16.874	107.46	18.098	99.074	-6.86	884.979	98.333
2019-01-07 18:30:00	15.191	118.942	15.956	120.462	16.874	111.865	17.945	96.926	-7.355	884.46	94.9663
2019-01-07 18:45:00	13.967	129.099	16.568	119.967	16.874	111.244	18.404	100.054	-7.619	884.367	91.6473
2019-01-07 19:00:00	15.038	117.851	16.874	119.245	17.18	108.526	19.322	98.001	-8.023	884.261	91.4678
2019-01-07 19:15:00	13.661	120.198	16.262	118.835	17.027	107.209	18.863	98.721	-8.436	884.354	92.0637
2019-01-07 19:30:00	13.049	122.397	15.956	119.635	17.639	112.249	18.404	99.095	-8.737	884.287	92.0178
2019-01-07 19:45:00	14.579	130.055	17.027	121.94	17.792	113.104	19.475	100.413	-8.717	884.181	91.8463
2019-01-07 20:00:00	13.814	126.589	15.956	119.223	17.18	112.953	18.404	101.214	-8.978	884.114	91.6315
2019-01-07 20:15:00	12.437	125.246	15.038	119.654	16.721	117.637	18.251	105.469	-9.117	884.261	91.6763
2019-01-07 20:30:00	13.814	129.719	16.109	128.061	17.333	117.55	18.863	104.201	-9.195	884.128	91.3018
2019-01-07 20:45:00	13.049	129.715	16.109	127.77	16.415	119.58	18.404	105.821	-9.12	884.154	90.7637
2019-01-07 21:00:00	14.885	129.016	18.251	126.729	19.628	118.531	20.699	106.059	-8.971	884.022	90.1913
2019-01-07 21:15:00	13.355	137.162	15.344	128.902	17.639	118.767	19.016	107.839	-9.045	884.088	91.0209
2019-01-07 21:30:00	12.743	130.983	14.885	127.345	17.18	121.105	17.945	106.952	-9.178	884.42	90.8909
2019-01-07 21:45:00	11.366	134.633	13.814	125.041	16.109	120.508	16.874	107.168	-9.493	884.473	90.8449
2019-01-07 22:00:00	13.049	131.119	16.568	124.945	17.486	117.354	18.863	105.967	-9.391	884.221	89.6623
2019-01-07 22:15:00	14.732	128.83	17.639	124.947	18.251	118.76	18.71	106.291	-8.974	883.955	89.9787
2019-01-07 22:30:00	13.814	136.848	16.568	129.926	17.486	122.645	18.098	108.601	-8.988	884.062	90.2303
2019-01-07 22:45:00	14.12	140.447	16.415	130.889	18.251	121.615	19.322	109.038	-8.829	883.928	91.1597
2019-01-07 23:00:00	14.426	135.882	16.568	134.223	18.404	125.627	19.781	110.593	-8.571	883.849	91.4742
2019-01-07 23:15:00	13.814	144.08	18.098	137.066	19.169	128.173	20.852	113.613	-8.063	883.702	91.7175
2019-01-07 23:30:00	13.355	138.677	15.65	133.453	18.251	128.368	19.322	112.984	-7.989	883.795	90.7348
2019-01-07 23:45:00	13.967	140.877	16.415	136.445	19.016	130.331	20.24	113.962	-7.778	883.476	91.4757
2019-01-08 00:00:00	14.273	143.746	17.027	140.272	18.71	127.809	19.934	113.21	-7.884	883.33	82.7197
2019-01-08 00:15:00	11.672	141.963	14.426	136.149	15.65	126.101	17.639	110.248	-8.52	883.489	89.1882
2019-01-08 00:30:00	12.896	141.286	16.415	133.705	18.251	126.539	18.863	112.155	-8.368	883.104	86.457
2019-01-08 00:45:00	15.65	139.684	17.333	134.111	19.169	127.739	20.852	112.48	-7.995	882.864	77.8477
2019-01-08 01:00:00	14.885	140.62	16.874	133.039	18.863	124.991	21.923	113.342	-8.026	883.024	81.6607
2019-01-08 01:15:00	13.508	145.463	16.415	138.747	18.863	133.898	21.464	117.948	-8.358	883.13	95.1387
2019-01-08 01:30:00	14.273	150.91	17.027	141.772	19.628	134.224	21.158	119.404	-8.476	882.718	95.8892
2019-01-08 01:45:00	15.497	146.772	18.71	143.852	21.464	134.932	22.076	119.762	-8.253	882.346	95.0153
2019-01-08 02:00:00	13.967	149.892	18.557	145.483	19.628	137.418	21.311	121.517	-8.446	882.439	96.8001
2019-01-08 02:15:00	13.661	151.052	17.027	149.041	19.016	138.655	20.699	122.402	-8.554	881.933	96.9335
2019-01-08 02:30:00	14.885	153.66	17.333	145.389	18.863	139.418	20.393	121.856	-8.148	881.854	96.639
2019-01-08 02:45:00	13.202	155.248	16.721	151.489	18.404	140.146	20.087	123.275	-8.178	881.694	96.1234
2019-01-08 03:00:00	13.049	148.769	15.956	149.882	18.251	141.727	19.475	124.832	-7.67	881.907	94.9673
2019-01-08 03:15:00	11.825	153.265	13.967	151.747	16.721	140.621	18.557	123.347	-7.582	882.053	93.5003
2019-01-08 03:30:00	13.049	150.908	15.497	149.976	17.486	142.86	19.016	124.445	-7.454	882.026	90.0657
2019-01-08 03:45:00	11.825	159.986	15.038	150.522	16.874	140.275	18.863	123.975	-7.636	882.093	90.0746
2019-01-08 04:00:00	10.601	150.109	12.896	145.91	14.732	139.463	16.262	126.574	-7.945	882.319	90.2938
2019-01-08 04:15:00	11.672	149.798	13.049	145.023	14.12	139.029	15.803	126.103	-8.253	882.093	91.3577
2019-01-08 04:30:00	12.284	149.048	14.732	146.295	15.65	136.113	16.721	121.945	-8.134	881.734	90.4905
2019-01-08 04:45:00	13.967	146.194	15.497	144.546	16.415	136.65	17.639	120.637	-7.863	881.708	90.8173
2019-01-08 05:00:00	11.672	146.999	14.732	146.403	16.568	138.458	18.71	123.115	-8.097	881.641	90.9581
2019-01-08 05:15:00	11.672	145.695	14.732	147.836	15.191	138.973	17.333	125.316	-8.246	881.641	90.1259
2019-01-08 05:30:00	12.59	145.718	14.273	147.194	15.497	137.792	17.792	121.802	-8.256	881.388	89.5783
2019-01-08 05:45:00	12.59	147.185	15.038	147.866	17.792	138.364	19.628	122.157	-8.168	881.202	90.3155
2019-01-08 06:00:00	11.366	145.616	13.967	142.93	16.262	135.071	17.792	120.652	-8.266	881.148	88.4969
2019-01-08 06:15:00	10.601	145.231	13.049	141.196	14.885	134.883	15.344	120.007	-8.249	880.869	90.8769
2019-01-08 06:30:00	10.295	141.663	13.967	141.644	15.191	134.449	17.18	118.029	-8.25	880.882	90.6059
2019-01-08 06:45:00	10.907	138.054	14.12	138.476	15.038	132.948	15.956	119.836	-8.11	880.856	90.6313
2019-01-08 07:00:00	10.907	138.712	13.814	139.676	15.65	131.651	17.027	118.27	-8.08	880.882	92.0776
2019-01-08 07:15:00	9.071	123.468	10.295	128.894	11.06	123.51	13.202	112.037	-9.781	880.869	92.2987
2019-01-08 07:30:00	8.765	134.507	11.672	130.668	13.967	126	15.191	113.231	-8.463	880.723	91.0013
2019-01-08 07:45:00	11.519	134.464	13.967	132.976	14.426	126.573	15.191	112.282	-9.303	880.417	90.2319
2019-01-08 08:00:00	10.601	132.229	14.12	129.96	14.732	122.669	15.344	111.257	-9.632	880.337	88.828
2019-01-08 08:15:00	9.377	129.953	13.049	126.481	14.885	120.231	14.885	107.702	-9.858	880.63	89.0639
2019-01-08 08:30:00	9.071	122.951	11.978	125.274	12.743	118.876	13.661	109.515	-10.025	880.524	91.1647
2019-01-08 08:45:00	9.683	135.265	12.896	133.131	14.12	125.678	14.732	111.809	-8.446	880.484	93.5311
2019-01-08 09:00:00	10.448	137.399	13.661	132.725	14.732	124.924	15.038	110.987	-8.358	880.391	79.2869
2019-01-08 09:15:00	8.306	122.837	10.448	126.759	12.284	118.783	13.202	108.669	-9.13	880.789	79.5331
2019-01-08 09:30:00	8.765	126.796	10.448	118.034	10.907	114.548	11.06	104.91	-9.791	880.763	79.7394
2019-01-08 09:45:00	8.918	138.406	11.825	135.549	12.59	125.235	13.049	114.256	-9.12	880.683	68.6149
2019-01-08 10:00:00	7.541	135.109	10.907	130.841	11.519	126.396	12.437	110.866	-8.747	880.856	74.2709
2019-01-08 10:15:00	9.071	136.706	11.825	132.132	12.437	127.369	13.661	113.863	-8.602	881.042	82.0567
2019-01-08 10:30:00	8.765	125.709	10.601	130.844	11.06	125.2	12.59	114.746	-8.795	881.175	102.79
2019-01-08 10:45:00	8	119.57	9.224	116.996	8.612	115.652	7.847	103.73	-8.981	881.375	114.758
2019-01-08 11:00:00	8.918	121.261	9.224	107.455	8.306	105.773	8	93.864	-8.893	881.468	108.111
2019-01-08 11:15:00	8	120.678	9.377	127.802	8.459	118.232	8.612	108.794	-8.294	881.708	108.852
2019-01-08 11:30:00	8.612	127.634	10.754	133.483	11.213	124.519	11.825	113.742	-7.799	881.867	93.6196
2019-01-08 11:45:00	9.683	126.851	11.519	127.958	11.825	120.207	12.284	110.697	-6.806	881.92	82.8549
2019-01-08 12:00:00	10.142	139.115	12.437	133	12.896	125.652	14.579	112.142	-6.271	882.133	77.5571
2019-01-08 12:15:00	10.601	138.203	12.437	131.022	13.508	120.937	13.967	110.239	-6.318	882.186	92.3841
2019-01-08 12:30:00	13.967	129.74	15.038	125.401	15.038	118.589	15.191	107.612	-6.332	881.841	98.1309
2019-01-08 12:45:00	12.743	134.654	14.732	124.079	13.967	114.517	14.273	104.895	-6.064	881.761	98.0613
2019-01-08 13:00:00	11.978	121.677	13.508	118.454	13.355	108.338	13.049	99.031	-5.807	881.867	90.2405
2019-01-08 13:15:00	12.437	123.494	13.049	117.714	13.355	113.726	13.049	102.563	-5.607	881.88	90.7857
2019-01-08 13:30:00	11.519	121.842	13.508	121.879	12.59	114.492	11.978	98.503	-5.614	881.654	92.1565
2019-01-08 13:45:00	12.131	122.594	13.661	113.914	13.508	107.514	13.355	98.385	-5.427	881.494	89.4962
2019-01-08 14:00:00	12.743	111.03	13.814	111.621	15.344	99.934	15.497	94.171	-5.346	881.295	87.9791
2019-01-08 14:15:00	12.284	113.955	13.814	110.298	13.661	102.706	14.426	96.239	-5.116	880.949	85.6186
2019-01-08 14:30:00	11.06	121.364	12.131	117.142	12.437	112.745	12.437	103.32	-4.906	880.696	87.5835
2019-01-08 14:45:00	13.202	122.667	14.273	113.45	14.732	113.347	13.355	96.172	-4.675	880.55	91.7534
2019-01-08 15:00:00	10.142	138.686	10.907	130.493	11.672	119.664	12.131	108.632	-4.222	880.39	90.3694
2019-01-08 15:15:00	11.366	147.894	12.743	148.569	13.661	138.912	14.732	126.826	-3.795	880.271	87.2689
2019-01-08 15:30:00	10.754	137.056	11.825	137.543	11.825	129.229	12.131	114.649	-3.605	880.47	92.4466
2019-01-08 15:45:00	10.754	145.672	11.06	138.76	11.366	132.352	11.672	114.984	-3.71	880.563	92.4775
2019-01-08 16:00:00	9.377	140.536	11.213	132.152	10.754	122.789	10.754	111.787	-3.571	880.483	90.0795
2019-01-08 16:15:00	10.448	131.37	11.978	129.803	11.825	127.538	11.366	118.182	-3.767	880.391	88.7027
2019-01-08 16:30:00	8.765	130.123	9.989	124.773	9.683	112.167	9.989	108.962	-3.757	880.51	90.1945
2019-01-08 16:45:00	9.989	144.799	12.284	138.251	12.284	129.571	13.049	118.634	-3.822	880.524	94.8057
2019-01-08 17:00:00	9.53	124.23	9.071	125.636	8.459	113.329	8.459	96.078	-3.907	880.55	105.324
2019-01-08 17:15:00	9.377	134.657	9.377	126.148	9.071	117.36	9.224	105.753	-3.876	880.47	103.776
2019-01-08 17:30:00	8.459	130.379	9.53	126.315	8.153	119.853	8.306	112.132	-3.995	880.417	106.109
2019-01-08 17:45:00	9.989	131.834	9.836	121.764	9.224	120.264	9.224	104.046	-4.191	880.245	105.386
2019-01-08 18:00:00	9.224	124.949	9.53	118.396	9.53	118.95	9.989	108.321	-4.547	880.231	107.517
2019-01-08 18:15:00	7.694	118.091	8.459	107.446	9.071	100.102	5.858	100.391	-5.13	880.112	114.485
2019-01-08 18:30:00	9.377	111.377	11.213	105.716	10.754	97.614	9.989	91.444	-6.163	879.766	113.414
2019-01-08 18:45:00	9.224	114.273	11.366	109.257	11.06	100.986	10.601	88.164	-6.494	879.712	117.287
2019-01-08 19:00:00	9.224	115.377	10.295	115.5	8.612	109.041	6.623	97.039	-6.983	879.539	119.442
2019-01-08 19:15:00	9.53	118.29	11.213	113.221	9.683	103.222	8.306	95.412	-7.189	879.513	116.377
2019-01-08 19:30:00	9.377	117.626	10.448	120.19	9.53	110.833	8.459	95.162	-7.358	879.593	112.191
2019-01-08 19:45:00	8.459	112.309	10.295	106.509	10.754	95.649	10.448	83.469	-7.569	879.593	111.324
2019-01-08 20:00:00	7.541	109.538	9.377	108.954	9.683	92.972	8.918	92.572	-8.077	879.646	110.048
2019-01-08 20:15:00	7.847	106.173	9.377	106.428	10.142	96.616	9.836	88.599	-8.9	879.593	115.585
2019-01-08 20:30:00	8.153	106.211	9.989	105.057	10.754	94.333	10.448	87.366	-9.262	879.18	107.633
2019-01-08 20:45:00	9.989	106.003	11.213	104.606	11.366	95.014	11.978	75.354	-9.957	879.286	100.289
2019-01-08 21:00:00	8.612	103.297	11.06	103.3	11.519	94.632	11.825	78.554	-10.302	879.246	97.6093
2019-01-08 21:15:00	9.53	108.43	11.825	104.484	12.131	92.191	11.825	75.14	-10.39	879.393	94.4033
2019-01-08 21:30:00	9.377	107.382	11.366	103.67	11.366	95.948	11.06	75.936	-10.858	879.193	92.5192
2019-01-08 21:45:00	9.683	106.835	12.284	102.6	12.59	96.229	12.896	71.65	-10.817	879.087	91.6409
2019-01-08 22:00:00	9.377	105.294	11.672	104.741	12.59	95.886	13.508	69.151	-10.973	879.14	101.081
2019-01-08 22:15:00	10.295	108.442	12.743	105.142	13.508	96.55	13.202	70.857	-10.915	879.047	108.467
2019-01-08 22:30:00	9.683	106.895	12.59	103.874	12.896	94.757	13.202	76.985	-10.946	879.113	113.231
2019-01-08 22:45:00	8.765	106.328	11.825	104.306	12.284	93.652	12.131	76.08	-11.048	879.073	108.342
2019-01-08 23:00:00	8.765	111.207	11.366	108.601	11.06	102.278	9.53	88.434	-11.041	879.18	102.969
2019-01-08 23:15:00	8.918	104.548	10.601	108.221	11.825	100	11.672	81.348	-10.773	879.113	107.188
2019-01-08 23:30:00	8.918	104.368	10.448	103.309	9.989	95.853	9.836	74.836	-11.288	879.206	98.9251
2019-01-08 23:45:00	7.694	105.333	9.377	103.632	9.836	94.902	9.53	83.037	-11.139	879.34	100.101
2019-01-09 00:00:00	7.541	100.016	9.377	107.732	10.907	95.616	10.448	81.976	-11.247	879.247	105.877
2019-01-09 00:15:00	8.153	112.987	9.836	109.101	10.142	104.309	8.612	87.829	-10.641	879.26	106.815
2019-01-09 00:30:00	8	107.381	10.142	107.387	10.754	101.759	8.918	83.229	-10.536	879.446	101.712
2019-01-09 00:45:00	7.235	110.692	9.683	106.251	10.448	94.583	9.836	81.201	-10.963	879.606	102.522
2019-01-09 01:00:00	7.541	114.807	9.989	107.518	9.683	99.001	7.235	85.718	-11.484	879.659	94.1768
2019-01-09 01:15:00	6.929	117.049	8.153	111.335	6.776	104.222	4.634	88.011	-11.43	879.899	91.6867
2019-01-09 01:30:00	7.541	119.222	9.377	109.012	8.306	99.889	6.47	76.828	-11.654	879.992	89.6106
2019-01-09 01:45:00	7.082	113.572	8.765	107.357	8.612	102.178	7.541	80.793	-11.573	879.939	83.7507
2019-01-09 02:00:00	6.929	121.845	7.235	115.23	5.552	107.273	4.94	83.478	-11.535	880.178	80.3255
2019-01-09 02:15:00	6.929	115.239	8	110.006	7.847	100.597	6.011	79.64	-11.701	880.045	77.3517
2019-01-09 02:30:00	6.929	113.077	8.765	107.99	7.847	98.576	6.623	86.24	-11.847	879.992	74.6835
2019-01-09 02:45:00	6.317	111.191	8.612	109.838	8.306	101.298	7.388	87.038	-11.912	879.939	80.3249
2019-01-09 03:00:00	7.388	113.567	8.459	105.846	7.388	98.343	6.776	78.836	-11.705	879.872	86.1481
2019-01-09 03:15:00	7.388	115.349	9.53	110.49	8.918	104.107	6.011	83.925	-11.031	879.819	85.9619
2019-01-09 03:30:00	7.694	110.473	9.683	111.236	9.224	97.051	7.847	75.363	-11.108	879.872	82.0427
2019-01-09 03:45:00	7.388	110.959	9.836	106.09	9.53	95.722	8.459	77.583	-11.336	880.098	78.8363
2019-01-09 04:00:00	6.317	107.5	7.694	104.778	8.153	89.54	7.847	77.442	-11.864	880.258	80.7306
2019-01-09 04:15:00	6.47	111.986	8.306	106.578	8.612	95.764	8.153	85.16	-12.016	880.484	80.2658
2019-01-09 04:30:00	5.705	114.207	7.388	106.538	8.153	92.257	6.929	78.187	-11.932	880.643	77.3542
2019-01-09 04:45:00	6.011	118.823	7.082	110.183	6.47	103.15	5.705	80.958	-11.874	880.789	74.3601
2019-01-09 05:00:00	5.705	114.171	7.541	110.865	7.388	101.033	6.011	77.224	-11.735	880.856	67.9741
2019-01-09 05:15:00	5.552	112.224	7.847	106.087	7.541	101.577	6.47	78.357	-12.098	880.989	66.6144
2019-01-09 05:30:00	5.399	107.764	6.623	103.147	7.388	95.011	6.929	82.685	-12.335	880.909	68.4067
2019-01-09 05:45:00	6.317	112.816	7.694	107.926	7.694	95.26	6.164	77.811	-11.874	880.962	69.6587
2019-01-09 06:00:00	6.164	111.32	7.541	108.894	7.082	98.044	5.858	77.055	-11.769	880.949	67.4119
2019-01-09 06:15:00	6.011	122.171	6.776	119.479	4.175	97.372	3.716	75.308	-11.563	880.843	73.0467
2019-01-09 06:30:00	6.776	124.087	6.929	121.563	5.399	112.002	4.022	89.027	-11.281	880.803	73.2289
2019-01-09 06:45:00	5.246	122.099	5.399	113.281	4.634	103.85	3.716	85.447	-11.2	880.789	70.7687
2019-01-09 07:00:00	5.399	123.269	6.011	115.537	4.481	109.026	3.41	84.02	-11.156	881.015	58.3582
2019-01-09 07:15:00	4.94	115.978	6.929	111.174	7.082	99.102	4.94	84.508	-11.485	880.976	49.5423
2019-01-09 07:30:00	5.246	116.277	6.011	117.81	4.481	104.337	3.563	85.131	-11.535	881.175	44.5342
2019-01-09 07:45:00	5.246	115.285	6.164	107.602	5.705	103.928	4.481	84.601	-11.312	881.175	50.5258
2019-01-09 08:00:00	5.399	116.612	6.47	105.002	6.011	101.895	4.634	83.121	-11.505	881.228	46.9927
2019-01-09 08:15:00	3.563	127.394	5.399	111.251	5.246	96.661	3.716	82.749	-11.596	881.495	47.6754
2019-01-09 08:30:00	4.328	123.653	4.94	106.284	4.634	103.362	3.41	84.576	-11.718	881.455	41.188
2019-01-09 08:45:00	3.869	141.865	4.481	107.934	3.104	101.043	3.104	82.341	-11.722	881.694	36.1308
2019-01-09 09:00:00	4.634	141.705	4.94	123.573	4.634	111.172	2.951	87.681	-12.03	881.668	29.9732
2019-01-09 09:15:00	4.634	138.46	5.246	130.085	4.328	118.489	2.951	92.824	-11.539	881.894	31.5731
2019-01-09 09:30:00	4.175	129.437	3.869	119.804	2.339	109.995	2.186	88.622	-11.373	882.226	30.1801
2019-01-09 09:45:00	4.175	131.499	4.634	118.776	3.716	106.932	2.798	90.915	-11.556	882.239	31.2104
2019-01-09 10:00:00	4.634	140.181	4.328	122.23	3.563	110.88	2.951	91.668	-11.793	882.465	32.718
2019-01-09 10:15:00	5.246	137.486	5.705	124.757	4.328	120.228	2.951	97.107	-11.694	882.691	36.1835
2019-01-09 10:30:00	4.328	146.697	5.552	121.99	4.787	108.653	3.257	91.134	-11.393	883.024	31.6547
2019-01-09 10:45:00	5.093	137.69	5.858	118.598	4.787	111.636	3.563	82.307	-10.777	883.37	28.7013
2019-01-09 11:00:00	4.94	138.372	6.317	132.221	5.858	118.166	4.328	100.16	-10.373	883.649	28.8789
2019-01-09 11:15:00	5.858	133.237	5.093	119.309	4.634	102.125	4.022	89.714	-9.933	883.955	32.5342
2019-01-09 11:30:00	6.47	131.278	7.388	125.866	7.541	116.825	7.847	97.422	-9.638	884.181	36.5219
2019-01-09 11:45:00	6.776	133.366	7.082	124.302	7.082	113.85	6.776	104.129	-9.313	884.248	33.4741
2019-01-09 12:00:00	6.317	132.822	6.776	121.388	6.776	111.512	6.623	94.753	-8.859	884.567	35.6307
2019-01-09 12:15:00	6.011	134.242	6.011	124.784	6.47	114.85	6.623	101.781	-8.595	884.713	38.0506
2019-01-09 12:30:00	6.776	133.882	6.929	126.607	6.929	115.697	6.929	101.079	-8.074	884.726	39.6811
2019-01-09 12:45:00	6.317	133.121	6.776	124.366	6.929	110.781	6.776	99.441	-7.345	884.739	45.1951
2019-01-09 13:00:00	6.929	124.788	7.541	121.542	7.694	110.889	7.388	98.501	-6.268	884.873	45.6532
2019-01-09 13:15:00	6.623	120.056	7.235	119.582	7.235	109.484	7.541	91.864	-5.712	885.045	43.0153
2019-01-09 13:30:00	8.306	108.61	10.142	111.561	9.989	101.152	10.142	90.741	-5.231	885.085	44.8731
2019-01-09 13:45:00	8.153	111.692	9.071	101.812	9.377	96.68	9.224	86.761	-4.933	884.966	57.5737
2019-01-09 14:00:00	9.377	96.702	10.295	99.26	10.448	88.59	10.142	77.57	-4.682	884.766	63.4865
2019-01-09 14:15:00	10.601	101.72	11.366	98.119	10.448	90.706	11.06	82.69	-4.578	884.686	64.9496
2019-01-09 14:30:00	9.683	99.559	10.142	96.916	10.142	86.448	10.754	82.14	-3.852	884.487	65.6903
2019-01-09 14:45:00	9.377	105.718	10.601	101.719	11.06	90.988	11.519	82.769	-3.94	884.646	66.5378
2019-01-09 15:00:00	9.53	103.114	10.142	100.001	10.295	88.133	10.601	82.918	-3.704	884.606	69.3505
2019-01-09 15:15:00	8	110.443	9.683	103.313	9.989	95.541	9.53	87.689	-3.663	884.513	83.1812
2019-01-09 15:30:00	8.918	101.431	10.601	94.806	10.601	87.885	10.295	82.324	-3.561	884.46	98.4303
2019-01-09 15:45:00	9.224	104.312	9.377	100.494	10.448	94.349	10.295	83.266	-3.615	884.473	101.723
2019-01-09 16:00:00	8.459	100.331	10.295	97.669	10.754	89.587	10.142	85.218	-3.646	884.513	90.8247
2019-01-09 16:15:00	9.377	105.259	9.53	102.503	10.142	92.082	9.836	85.224	-3.602	884.5	63.5537
2019-01-09 16:30:00	8.765	108.067	9.989	103.077	9.683	94.044	10.142	86.129	-3.683	884.659	34.9974
2019-01-09 16:45:00	7.694	112.688	9.224	102.279	9.377	96.489	9.224	90.26	-3.676	884.912	32.5511
2019-01-09 17:00:00	8.612	110.022	9.071	96.784	9.989	87.43	9.53	84.152	-3.771	884.859	41.7935
2019-01-09 17:15:00	7.082	113.038	7.847	106.911	7.847	95.804	8.765	85.971	-3.988	884.872	64.684
2019-01-09 17:30:00	8.459	104.963	8.918	103.836	8.918	97.527	9.224	85.821	-4.103	884.979	71.6139
2019-01-09 17:45:00	6.929	109.135	7.541	105.324	8.306	95.87	8.612	87.789	-4.157	885.032	78.8299
2019-01-09 18:00:00	7.847	114.19	8.306	105.925	8.306	94.989	8.306	85.455	-4.723	884.979	69.9057
2019-01-09 18:15:00	6.623	107.337	7.082	98.96	7.388	90.093	8.306	75.711	-5.113	884.806	74.6691
2019-01-09 18:30:00	5.705	119.418	6.47	109.55	7.388	100.363	7.694	85.856	-5.468	884.899	73.2069
2019-01-09 18:45:00	4.634	120.364	5.399	110.463	6.317	105.624	6.47	96.153	-5.844	884.926	62.642
2019-01-09 19:00:00	4.481	127.925	5.093	118.492	5.246	107.254	5.093	89.084	-6.139	884.899	48.4139
2019-01-09 19:15:00	3.257	118.852	4.481	113.429	4.787	105.16	4.94	82.991	-6.549	884.819	48.8685
2019-01-09 19:30:00	3.104	126.001	3.41	113.047	4.022	102.799	4.022	86.277	-7.057	884.939	39.5584
2019-01-09 19:45:00	3.716	120.133	4.787	110.53	5.093	100.709	5.705	80.49	-7.06	884.966	38.1658
2019-01-09 20:00:00	2.798	126.421	4.022	109.618	4.634	102.776	4.328	82.176	-7.741	885.006	35.878
2019-01-09 20:15:00	2.645	122.021	2.798	101.644	3.563	93.54	3.869	74.15	-7.751	885.099	33.829
2019-01-09 20:30:00	3.104	121.949	3.869	109.399	4.328	102.424	4.634	90.833	-8.351	885.152	34.8136
2019-01-09 20:45:00	2.033	121.94	3.563	101.178	4.328	94.047	4.634	66.557	-8.781	885.245	30.7883
2019-01-09 21:00:00	3.104	129.271	4.787	107.902	5.093	102.357	5.705	75.766	-8.507	885.485	28.3603
2019-01-09 21:15:00	4.175	141.02	4.787	119.944	4.634	111.695	4.481	87.546	-8.205	885.285	26.4025
2019-01-09 21:30:00	4.481	116.532	4.94	116.162	4.175	106.014	2.798	74.257	-8.26	885.431	26.1947
2019-01-09 21:45:00	5.246	119.143	5.246	113.24	4.94	103.987	2.951	75.042	-8.385	885.272	26.0421
2019-01-09 22:00:00	4.328	130.907	4.328	127.81	3.563	125.74	2.951	84.283	-8.558	885.352	20.037
2019-01-09 22:15:00	4.022	123.901	4.787	121.178	3.716	115.133	2.798	79.65	-9.008	885.005	20.7399
2019-01-09 22:30:00	3.869	134.808	3.41	122.341	2.033	106.908	1.351	86.562	-9.703	884.966	21.3604
2019-01-09 22:45:00	4.634	131.799	5.093	113.537	3.41	109.443	2.339	80.35	-9.124	884.713	26.5082
2019-01-09 23:00:00	4.634	130.471	5.399	116.27	4.481	109.486	2.798	78.382	-9.117	884.5	31.6658
2019-01-09 23:15:00	5.093	140.326	5.858	118.333	5.399	115.675	4.175	78.939	-9.212	884.487	34.2487
2019-01-09 23:30:00	5.399	138.118	6.623	131.887	5.093	118.849	3.104	92.648	-9.536	884.354	32.2231
2019-01-09 23:45:00	4.94	132.838	6.164	115.62	4.328	102.652	3.257	74.925	-9.635	884.261	34.6601
2019-01-10 00:00:00	5.246	140.102	5.705	120.674	4.022	116.272	2.492	77.641	-9.784	884.048	34.3947
2019-01-10 00:15:00	4.481	128.838	4.787	114.262	3.716	107.42	3.257	75.149	-9.808	884.088	33.4227
2019-01-10 00:30:00	4.481	129.286	5.246	112.474	4.328	96.897	4.328	76.143	-10.194	884.101	32.9561
2019-01-10 00:45:00	4.481	134.223	4.481	119.371	3.869	101.621	2.645	79.03	-10.272	883.862	34.7952
2019-01-10 01:00:00	3.869	135.468	4.787	112.304	3.257	106.974	2.492	83.57	-10.37	883.995	32.5458
2019-01-10 01:15:00	4.634	151.353	4.94	134.618	4.634	123.138	3.716	91.663	-10.448	883.836	31.4547
2019-01-10 01:30:00	3.869	138.587	5.093	128.436	3.716	112.502	2.492	86.824	-10.225	883.716	30.4651
2019-01-10 01:45:00	3.716	128.004	3.563	124.536	2.951	98.68	1.88	83.983	-10.228	883.503	28.6234
2019-01-10 02:00:00	3.869	132.443	4.481	121.608	3.869	104.515	1.88	93.632	-10.153	883.676	31.9841
2019-01-10 02:15:00	3.716	124.47	4.022	114.042	3.41	117.054	2.492	95.23	-10.259	883.33	41.2953
2019-01-10 02:30:00	3.716	136.953	4.175	115.053	3.716	110.819	2.798	97.699	-10.336	883.197	45.9047
2019-01-10 02:45:00	5.246	130.48	5.246	114.068	4.175	109.786	4.022	78.945	-10.292	882.758	49.7325
2019-01-10 03:00:00	4.328	129.346	5.246	121.891	4.634	122.132	3.716	94.974	-10.38	882.904	54.9443
2019-01-10 03:15:00	4.94	131.145	4.94	117.094	4.175	115.096	3.257	94.786	-10.611	882.771	68.001
2019-01-10 03:30:00	4.175	127.37	4.94	114.749	4.787	103.795	4.328	81.293	-10.56	882.585	78.5724
2019-01-10 03:45:00	2.951	139.758	3.869	116.316	2.798	106.778	2.492	75.077	-11.088	882.531	82.7676
2019-01-10 04:00:00	3.257	136.945	4.328	122.848	4.022	101.434	2.186	71.517	-11.051	882.399	85.1785
2019-01-10 04:15:00	3.563	126.819	3.869	117.655	2.951	115.78	2.033	89.344	-10.76	882.213	91.4293
2019-01-10 04:30:00	4.022	137.571	4.481	120.679	3.563	111.399	2.951	93.092	-10.915	882.093	88.3663
2019-01-10 04:45:00	3.41	127.894	4.022	114.326	2.798	95.679	2.951	88.525	-10.932	882.372	87.3457
2019-01-10 05:00:00	2.645	124.473	3.716	105.043	3.716	95.171	3.257	75.269	-11.19	882.346	91.5243
2019-01-10 05:15:00	2.951	135.991	3.563	114.371	3.257	102.3	3.104	84.327	-11.041	882.027	90.9901
2019-01-10 05:30:00	2.951	124.919	3.869	113.266	3.563	97.659	2.798	79.374	-10.716	882.013	94.3605
2019-01-10 05:45:00	3.257	127.296	3.716	124.886	3.257	105.148	2.798	88.384	-10.556	881.827	98.6082
2019-01-10 06:00:00	3.869	125.326	4.787	109.785	4.022	98.398	4.175	74.912	-10.587	881.854	107.593
2019-01-10 06:15:00	6.011	116.762	6.317	105.326	6.164	94.62	5.705	86.394	-10.153	881.561	121.205
2019-01-10 06:30:00	5.246	118.433	6.317	110.199	5.552	98.985	5.093	79.194	-10.085	881.681	133.375
2019-01-10 06:45:00	5.552	119.775	6.776	114.169	5.246	98.113	5.093	72.552	-10.119	881.654	135.71
2019-01-10 07:00:00	7.388	119.089	8.612	108.424	9.071	97.299	8.612	79.203	-10.075	881.441	142.765
2019-01-10 07:15:00	8	111.626	9.071	108.253	8.612	95.884	7.694	78.434	-9.967	881.335	145.168
2019-01-10 07:30:00	8	114.127	8.765	106.593	8	98.62	7.847	76.69	-9.909	881.295	143.923
2019-01-10 07:45:00	6.776	112.777	8.153	101.801	8.306	96.722	7.541	86.713	-9.76	881.348	153.383
2019-01-10 08:00:00	6.164	115.327	6.929	108.182	6.47	102.336	5.552	90.784	-9.659	881.401	148.26
2019-01-10 08:15:00	4.634	112.662	5.552	116.253	4.94	107.592	3.869	91.154	-9.56	881.481	148.64
2019-01-10 08:30:00	5.705	107.265	6.011	110.787	6.317	92.941	5.858	81.842	-9.435	881.548	156.784
2019-01-10 08:45:00	7.082	117.037	8	111.403	7.388	106.901	6.011	85.751	-9.232	881.295	158.731
2019-01-10 09:00:00	8.153	107.031	9.836	104.154	10.601	97.671	9.989	81.333	-9.168	881.108	172.079
2019-01-10 09:15:00	8	104.89	10.295	104.706	10.907	95.846	11.213	83.148	-9.164	880.803	169.593
2019-01-10 09:30:00	9.071	118.993	10.142	116.187	9.836	105.196	10.142	89.933	-9.039	880.949	162.014
2019-01-10 09:45:00	10.754	119.712	11.06	113.867	12.131	107.754	11.672	88.562	-8.947	880.63	168.719
2019-01-10 10:00:00	12.437	118.279	12.59	116.403	13.049	104.879	13.202	89.36	-8.687	880.497	162.483
2019-01-10 10:15:00	13.967	110.514	16.109	106.983	17.18	99.646	17.792	86.751	-8.788	879.899	151.68
2019-01-10 10:30:00	13.508	121.845	15.803	107.876	16.874	99.365	17.945	87.385	-8.646	880.165	143.767
2019-01-10 10:45:00	11.519	118.361	13.814	118.884	14.426	103.828	14.579	88.143	-8.314	880.51	122.074
2019-01-10 11:00:00	13.967	114.178	15.038	111.028	15.803	103.075	15.956	84.587	-8.057	880.47	101.496
2019-01-10 11:15:00	13.355	107.766	15.038	103.582	15.956	98.279	16.568	83.304	-7.873	880.164	117.532
2019-01-10 11:30:00	13.049	108.051	14.426	109.056	16.262	100.971	16.109	86.671	-7.24	880.258	100.273
2019-01-10 11:45:00	13.967	112.829	15.191	106.754	17.18	100.209	17.792	87.589	-7.406	880.165	72.645
2019-01-10 12:00:00	12.59	106.902	15.191	103.395	16.415	98.447	16.721	84.413	-7.524	880.125	52.9976
2019-01-10 12:15:00	12.437	113.058	14.12	108.929	15.497	101.294	16.262	89.092	-6.305	880.138	61.657
2019-01-10 12:30:00	13.049	113.365	13.967	111.705	13.814	101.942	14.579	88.614	-5.702	880.138	61.3908
2019-01-10 12:45:00	12.896	106.134	14.579	105.651	14.885	96.512	15.344	83.25	-5.34	880.43	49.5267
2019-01-10 13:00:00	13.355	118.052	14.579	108.184	15.038	98.75	15.038	87.001	-5.932	880.204	51.2369
2019-01-10 13:15:00	13.202	110.938	14.273	108.511	15.038	99.745	15.344	86.471	-5.306	879.992	67.2338
2019-01-10 13:30:00	13.355	116.287	15.497	110.489	15.497	101.615	15.344	85.174	-5.373	879.899	56.4844
2019-01-10 13:45:00	14.273	108.135	15.65	106.272	16.109	97.528	16.415	84.896	-5.065	879.632	54.6257
2019-01-10 14:00:00	14.885	104.668	16.109	105.621	17.027	96.689	17.486	88.412	-4.73	879.406	56.5985
2019-01-10 14:15:00	15.497	104.818	15.344	104.16	15.956	94.329	17.486	85.97	-5.065	879.114	75.8687
2019-01-10 14:30:00	16.262	105.106	18.251	104.411	19.169	96.409	19.169	87.649	-5.651	878.462	94.1713
2019-01-10 14:45:00	16.109	105.758	17.333	103.863	18.71	97.815	19.934	87.097	-5.976	878.05	100.203
2019-01-10 15:00:00	15.65	107.493	17.333	106.127	18.863	97.158	19.475	83.75	-6.075	877.797	100.264
2019-01-10 15:15:00	15.038	104.859	17.639	103.93	18.098	96.557	19.169	85.788	-5.76	877.797	99.9082
2019-01-10 15:30:00	16.109	106.041	17.639	103.728	18.098	96.907	18.251	85.807	-5.688	877.438	96.8513
2019-01-10 15:45:00	14.273	109.349	16.262	105.917	17.486	95.623	18.251	85.925	-5.587	877.252	94.6716
2019-01-10 16:00:00	15.803	103.475	16.262	104.346	17.486	93.735	17.945	84.02	-5.336	877.318	72.7963
2019-01-10 16:15:00	15.344	105.67	16.874	102.649	17.486	92.106	18.251	82.709	-5.55	877.159	33.123
2019-01-10 16:30:00	14.579	105.392	16.721	102.182	17.639	92.667	18.863	83.011	-5.59	877.145	25.0218
2019-01-10 16:45:00	15.956	103.625	17.027	98.417	18.098	86.515	18.863	81.288	-5.123	877.199	27.7114
2019-01-10 17:00:00	12.896	95.336	14.885	96.324	16.568	86.577	16.874	77.256	-5.438	877.651	44.799
2019-01-10 17:15:00	13.508	101.855	14.885	98.989	15.497	87.888	15.497	76.938	-5.783	877.837	70.9951
2019-01-10 17:30:00	14.426	104.732	14.885	94.538	16.262	85.273	16.874	76.351	-5.98	877.598	95.4879
2019-01-10 17:45:00	13.355	97.954	15.956	93.046	15.65	84.982	16.415	73.353	-6.23	877.864	123.51
2019-01-10 18:00:00	13.814	99.411	15.497	95.7	15.497	88.346	15.65	79.205	-6.176	877.851	146.309
2019-01-10 18:15:00	12.284	106.014	13.508	94.617	14.885	88.132	15.956	76.612	-6.576	878.05	163.542
2019-01-10 18:30:00	11.366	100.492	14.273	95.512	15.191	89.992	15.956	73.201	-6.901	878.143	168.288
2019-01-10 18:45:00	11.06	107.157	13.967	100.208	14.732	90.875	15.191	84.041	-7.392	878.489	163.94
2019-01-10 19:00:00	10.448	104.601	11.672	105.491	13.202	95.026	13.661	83.781	-7.535	878.555	151.463
2019-01-10 19:15:00	8.459	130.817	9.53	118.315	11.366	107.651	12.437	93.082	-7.633	878.648	145.289
2019-01-10 19:30:00	7.388	124.953	9.683	110.897	10.754	100.678	11.213	85.445	-7.9	879.1	143.941
2019-01-10 19:45:00	8.153	114.296	9.836	113.517	11.06	101.64	11.672	84.784	-8.362	878.821	145.86
2019-01-10 20:00:00	7.541	118.688	9.224	112.067	11.06	103.749	12.284	87.738	-8.541	878.741	145.018
2019-01-10 20:15:00	8.918	117.345	10.754	110.797	11.519	101.301	12.284	85.192	-8.842	878.449	146.796
2019-01-10 20:30:00	8.153	115.667	10.142	106.613	10.754	99.958	12.896	84.981	-9.049	878.555	143.399
2019-01-10 20:45:00	7.388	119.048	9.683	114.931	10.601	105.031	11.366	86.368	-9.293	878.595	147.635
2019-01-10 21:00:00	7.388	118.65	8.306	109.919	9.377	101.65	10.907	88.213	-9.466	878.475	149.764
2019-01-10 21:15:00	6.623	115.419	8.765	111.749	9.377	102.293	10.295	85.934	-9.72	878.25	149.004
2019-01-10 21:30:00	7.847	118.632	9.683	111.175	10.601	101.45	11.978	87.11	-9.771	878.05	157.615
2019-01-10 21:45:00	7.694	118.064	8.765	117.576	9.377	107.28	9.53	91.976	-9.645	878.103	159.121
2019-01-10 22:00:00	7.541	116.609	9.377	110.248	10.448	102.173	10.907	91.582	-9.845	877.917	147.075
2019-01-10 22:15:00	6.623	120.56	7.235	118.226	8.459	106.88	9.683	92.214	-9.763	877.97	138.624
2019-01-10 22:30:00	6.317	112.974	7.694	112.528	7.847	101.341	8.306	85.883	-9.964	878.183	124.38
2019-01-10 22:45:00	4.481	113.163	5.858	111.443	6.623	100.683	8	84.042	-10.326	878.143	115.748
2019-01-10 23:00:00	4.787	124.111	5.246	120.009	6.164	103.896	6.164	90.7	-10.61	877.837	100.437
2019-01-10 23:15:00	5.705	117.751	6.623	111.232	4.94	100.736	4.328	73.671	-10.77	877.638	100.051
2019-01-10 23:30:00	5.705	124.988	6.317	112.054	4.328	99.725	4.175	79.108	-10.888	877.731	100.922
2019-01-10 23:45:00	4.787	117.119	6.623	112.549	4.94	97.144	4.022	79.662	-10.922	877.571	105.863
2019-01-11 00:00:00	5.399	120.14	5.858	119.967	4.481	103.885	3.869	79.838	-11.118	877.438	89.4448
2019-01-11 00:15:00	4.328	126.485	5.858	102.437	6.011	100.224	5.705	69.864	-11.055	877.651	76.4069
2019-01-11 00:30:00	3.41	141.512	4.787	118.489	3.869	111.944	3.104	88.191	-11.363	877.757	57.6177
2019-01-11 00:45:00	3.41	127.869	3.563	108.492	2.339	100.35	2.033	75.408	-11.275	877.691	48.0564
2019-01-11 01:00:00	2.645	141.848	3.41	113.139	2.798	108.012	2.186	88.216	-11.512	877.624	39.5263
2019-01-11 01:15:00	3.41	116.499	4.328	101.356	4.481	92.95	4.787	66.46	-11.268	877.611	31.1635
2019-01-11 01:30:00	3.563	118.169	4.634	108.304	4.328	101.901	3.563	71.293	-11.315	877.718	32.4998
2019-01-11 01:45:00	4.94	116.137	4.94	106.067	4.634	88.307	4.481	59.959	-11.037	877.85	33.2147
2019-01-11 02:00:00	4.481	124.254	4.175	116.182	3.716	102.359	2.645	86.712	-11.038	877.837	32.8417
2019-01-11 02:15:00	4.175	130.983	4.787	124.806	3.869	118.381	3.104	88.57	-11.237	877.731	30.7703
2019-01-11 02:30:00	3.563	128.182	4.634	121.53	4.328	113.854	2.798	88.443	-11.542	877.638	21.9496
2019-01-11 02:45:00	2.798	130.345	4.481	110.976	5.093	96.668	4.634	77.274	-11.901	877.664	19.0316
2019-01-11 03:00:00	2.645	154.216	2.645	129.966	1.657	100.484	0.822	88.396	-11.973	877.571	18.7867
2019-01-11 03:15:00	3.41	150.638	3.257	137.361	3.257	132.595	2.645	97.711	-11.44	877.438	17.3789
2019-01-11 03:30:00	3.869	134.749	4.328	116.107	3.716	110.114	2.798	89.71	-11.224	877.438	13.6761
2019-01-11 03:45:00	3.716	142.917	4.328	129.333	3.563	119.318	3.104	95.842	-11.349	877.345	10.153
2019-01-11 04:00:00	3.41	140.102	3.563	122.382	3.104	103.802	2.186	97.404	-11.363	877.611	11.5747
2019-01-11 04:15:00	3.104	149.741	2.492	129.066	1.88	109.831	1.504	92.009	-11.44	877.677	8.39107
2019-01-11 04:30:00	2.339	153.853	2.492	127.685	2.339	104.002	0.669	74.824	-11.027	877.877	8.01093
2019-01-11 04:45:00	3.104	161.998	2.798	141.486	2.798	132.03	2.339	109.625	-11.115	877.638	8.67287
2019-01-11 05:00:00	2.645	153.093	2.798	128.211	1.88	122.006	1.504	96.089	-11.007	877.691	10.3456
2019-01-11 05:15:00	2.339	140.079	3.104	123.923	2.339	112.412	1.657	89.098	-10.878	877.518	7.29507
2019-01-11 05:30:00	1.727	143.72	1.727	119.682	1.421	105.318	1.574	84.582	-10.987	877.678	5.96493
2019-01-11 05:45:00	2.492	171.975	2.492	142.177	2.645	135.477	2.186	113.403	-10.98	877.518	5.11187
2019-01-11 06:00:00	2.033	135.971	2.492	117.629	2.798	113.103	1.657	85.607	-10.753	877.385	5.74753
2019-01-11 06:15:00	0.446	110.776	1.574	119.407	1.657	105.625	1.045	101.683	-11.745	877.425	4.60273
2019-01-11 06:30:00	1.115	80.432	0.446	118.87	2.186	107.113	1.727	91.952	-13.283	877.132	2.604
2019-01-11 06:45:00	0	65.288	0	115.009	0.446	101.887	0.669	90.7	-13.903	877.305	0.0936
2019-01-11 07:00:00	0	65.279	0	130.831	0	102.064	1.115	84.54	-14.126	877.212	0.522333
2019-01-11 07:15:00	0	65.284	0	130.815	0	102.095	1.268	93.038	-14.398	876.946	1.17707
2019-01-11 07:30:00	0	65.295	0	130.778	0	102.041	0.223	84.597	-14.662	877.026	0.513467
2019-01-11 07:45:00	0	65.275	0	130.775	0	102.045	0	94.87	-14.337	877.412	1.38407
2019-01-11 08:00:00	0	73.29	0.446	130.698	0	102.024	0.669	79.821	-13.653	877.199	2.25713
2019-01-11 08:15:00	0.223	132.134	0	130.705	0	102.064	2.033	94.982	-13.161	877.292	2.55207
2019-01-11 08:30:00	0.446	130.212	0.669	119.32	1.045	102.966	1.421	97.2	-13.1	877.438	4.6424
2019-01-11 08:45:00	1.88	77.574	2.033	91.527	1.88	93.771	1.421	86.098	-14.184	877.784	4.4362
2019-01-11 09:00:00	0	120.164	0.599	91.26	0.822	93.713	2.186	79.082	-14.736	877.837	2.70973
2019-01-11 09:15:00	0	120.15	0	91.343	0.446	80.053	1.198	86.015	-14.764	877.89	2.26047
2019-01-11 09:30:00	0	120.149	0.446	104.343	0.669	98.687	1.657	91.578	-15.292	877.957	2.49133
2019-01-11 09:45:00	0	120.143	0	122.401	0.446	107.163	1.421	77.939	-14.899	877.957	3.26667
2019-01-11 10:00:00	0	120.164	0.446	120.701	0.822	113.111	1.268	91.863	-14.98	878.063	6.6768
2019-01-11 10:15:00	0	103.627	0.446	124.287	2.033	114.925	2.339	91.726	-14.137	878.196	9.12053
2019-01-11 10:30:00	0	103.608	1.268	118.078	2.033	101.411	1.574	90.615	-13.497	878.662	7.984
2019-01-11 10:45:00	0	103.601	0	121.824	1.045	115.994	1.727	99.898	-13.029	879.353	8.40127
2019-01-11 11:00:00	0	103.579	0	118.963	1.421	115.294	1.88	88.631	-13.653	880.031	7.8696
2019-01-11 11:15:00	0	103.592	0	113.361	1.115	109.665	1.88	97.845	-12.802	880.51	9.64187
2019-01-11 11:30:00	0	103.604	0	121.177	0.446	112.6	0.599	89.142	-11.546	881.002	10.2319
2019-01-11 11:45:00	0	77.35	0	115.69	0.223	92.97	1.574	77.073	-12.105	881.628	10.4737
2019-01-11 12:00:00	0	63.67	0	118.461	0	101.287	1.657	80.213	-11.379	881.841	13.0568
2019-01-11 12:15:00	0	45.314	0.223	110.348	0	90.161	1.045	74.263	-9.764	882.292	14.3457
2019-01-11 12:30:00	0	356.611	0.223	72.17	1.574	90.261	2.033	72.87	-8.859	882.425	16.0004
2019-01-11 12:45:00	2.116	99.103	2.033	89.741	2.645	88.617	2.798	68.364	-7.646	882.425	20.894
2019-01-11 13:00:00	3.563	123.289	3.869	116.507	2.339	109.932	2.645	92.953	-6.816	882.239	22.7178
2019-01-11 13:15:00	3.716	111.45	3.257	100.789	3.257	97.236	3.104	95.939	-6.254	881.614	29.6574
2019-01-11 13:30:00	13.355	116.287	15.497	110.489	15.497	101.615	15.344	85.174	-5.373	879.899	56.4844
2019-01-11 13:45:00	14.273	108.135	15.65	106.272	16.109	97.528	16.415	84.896	-5.065	879.632	54.6257
2019-01-11 14:00:00	14.885	104.668	16.109	105.621	17.027	96.689	17.486	88.412	-4.73	879.406	56.5985
2019-01-11 14:15:00	15.497	104.818	15.344	104.16	15.956	94.329	17.486	85.97	-5.065	879.114	75.8687
2019-01-11 14:30:00	16.262	105.106	18.251	104.411	19.169	96.409	19.169	87.649	-5.651	878.462	94.1713
2019-01-11 14:45:00	16.109	105.758	17.333	103.863	18.71	97.815	19.934	87.097	-5.976	878.05	100.203
2019-01-11 15:00:00	15.65	107.493	17.333	106.127	18.863	97.158	19.475	83.75	-6.075	877.797	100.264
2019-01-11 15:15:00	15.038	104.859	17.639	103.93	18.098	96.557	19.169	85.788	-5.76	877.797	99.9082
2019-01-11 15:30:00	16.109	106.041	17.639	103.728	18.098	96.907	18.251	85.807	-5.688	877.438	96.8513
2019-01-11 15:45:00	14.273	109.349	16.262	105.917	17.486	95.623	18.251	85.925	-5.587	877.252	94.6716
2019-01-11 16:00:00	15.803	103.475	16.262	104.346	17.486	93.735	17.945	84.02	-5.336	877.318	72.7963
2019-01-11 16:15:00	15.344	105.67	16.874	102.649	17.486	92.106	18.251	82.709	-5.55	877.159	33.123
2019-01-11 16:30:00	14.579	105.392	16.721	102.182	17.639	92.667	18.863	83.011	-5.59	877.145	25.0218
2019-01-11 16:45:00	15.956	103.625	17.027	98.417	18.098	86.515	18.863	81.288	-5.123	877.199	27.7114
2019-01-11 17:00:00	12.896	95.336	14.885	96.324	16.568	86.577	16.874	77.256	-5.438	877.651	44.799
2019-01-11 17:15:00	13.508	101.855	14.885	98.989	15.497	87.888	15.497	76.938	-5.783	877.837	70.9951
2019-01-11 17:30:00	14.426	104.732	14.885	94.538	16.262	85.273	16.874	76.351	-5.98	877.598	95.4879
2019-01-11 17:45:00	13.355	97.954	15.956	93.046	15.65	84.982	16.415	73.353	-6.23	877.864	123.51
2019-01-11 18:00:00	13.814	99.411	15.497	95.7	15.497	88.346	15.65	79.205	-6.176	877.851	146.309
2019-01-11 18:15:00	12.284	106.014	13.508	94.617	14.885	88.132	15.956	76.612	-6.576	878.05	163.542
2019-01-11 18:30:00	11.366	100.492	14.273	95.512	15.191	89.992	15.956	73.201	-6.901	878.143	168.288
2019-01-11 18:45:00	11.06	107.157	13.967	100.208	14.732	90.875	15.191	84.041	-7.392	878.489	163.94
2019-01-11 19:00:00	10.448	104.601	11.672	105.491	13.202	95.026	13.661	83.781	-7.535	878.555	151.463
2019-01-11 19:15:00	8.459	130.817	9.53	118.315	11.366	107.651	12.437	93.082	-7.633	878.648	145.289
2019-01-11 19:30:00	7.388	124.953	9.683	110.897	10.754	100.678	11.213	85.445	-7.9	879.1	143.941
2019-01-11 19:45:00	8.153	114.296	9.836	113.517	11.06	101.64	11.672	84.784	-8.362	878.821	145.86
2019-01-11 20:00:00	7.541	118.688	9.224	112.067	11.06	103.749	12.284	87.738	-8.541	878.741	145.018
2019-01-11 20:15:00	8.918	117.345	10.754	110.797	11.519	101.301	12.284	85.192	-8.842	878.449	146.796
2019-01-11 20:30:00	8.153	115.667	10.142	106.613	10.754	99.958	12.896	84.981	-9.049	878.555	143.399
2019-01-11 20:45:00	7.388	119.048	9.683	114.931	10.601	105.031	11.366	86.368	-9.293	878.595	147.635
2019-01-11 21:00:00	7.388	118.65	8.306	109.919	9.377	101.65	10.907	88.213	-9.466	878.475	149.764
2019-01-11 21:15:00	6.623	115.419	8.765	111.749	9.377	102.293	10.295	85.934	-9.72	878.25	149.004
2019-01-11 21:30:00	7.847	118.632	9.683	111.175	10.601	101.45	11.978	87.11	-9.771	878.05	157.615
2019-01-11 21:45:00	7.694	118.064	8.765	117.576	9.377	107.28	9.53	91.976	-9.645	878.103	159.121
2019-01-11 22:00:00	7.541	116.609	9.377	110.248	10.448	102.173	10.907	91.582	-9.845	877.917	147.075
2019-01-11 22:15:00	6.623	120.56	7.235	118.226	8.459	106.88	9.683	92.214	-9.763	877.97	138.624
2019-01-11 22:30:00	6.317	112.974	7.694	112.528	7.847	101.341	8.306	85.883	-9.964	878.183	124.38
2019-01-11 22:45:00	4.481	113.163	5.858	111.443	6.623	100.683	8	84.042	-10.326	878.143	115.748
2019-01-11 23:00:00	4.787	124.111	5.246	120.009	6.164	103.896	6.164	90.7	-10.61	877.837	100.437
2019-01-11 23:15:00	5.705	117.751	6.623	111.232	4.94	100.736	4.328	73.671	-10.77	877.638	100.051
2019-01-11 23:30:00	5.705	124.988	6.317	112.054	4.328	99.725	4.175	79.108	-10.888	877.731	100.922
2019-01-11 23:45:00	4.787	117.119	6.623	112.549	4.94	97.144	4.022	79.662	-10.922	877.571	105.863
2019-01-12 00:00:00	5.399	120.14	5.858	119.967	4.481	103.885	3.869	79.838	-11.118	877.438	89.4448
2019-01-12 00:15:00	4.328	126.485	5.858	102.437	6.011	100.224	5.705	69.864	-11.055	877.651	76.4069
2019-01-12 00:30:00	3.41	141.512	4.787	118.489	3.869	111.944	3.104	88.191	-11.363	877.757	57.6177
2019-01-12 00:45:00	3.41	127.869	3.563	108.492	2.339	100.35	2.033	75.408	-11.275	877.691	48.0564
2019-01-12 01:00:00	2.645	141.848	3.41	113.139	2.798	108.012	2.186	88.216	-11.512	877.624	39.5263
2019-01-12 01:15:00	3.41	116.499	4.328	101.356	4.481	92.95	4.787	66.46	-11.268	877.611	31.1635
2019-01-12 01:30:00	3.563	118.169	4.634	108.304	4.328	101.901	3.563	71.293	-11.315	877.718	32.4998
2019-01-12 01:45:00	4.94	116.137	4.94	106.067	4.634	88.307	4.481	59.959	-11.037	877.85	33.2147
2019-01-12 02:00:00	4.481	124.254	4.175	116.182	3.716	102.359	2.645	86.712	-11.038	877.837	32.8417
2019-01-12 02:15:00	4.175	130.983	4.787	124.806	3.869	118.381	3.104	88.57	-11.237	877.731	30.7703
2019-01-12 02:30:00	3.563	128.182	4.634	121.53	4.328	113.854	2.798	88.443	-11.542	877.638	21.9496
2019-01-12 02:45:00	2.798	130.345	4.481	110.976	5.093	96.668	4.634	77.274	-11.901	877.664	19.0316
2019-01-12 03:00:00	2.645	154.216	2.645	129.966	1.657	100.484	0.822	88.396	-11.973	877.571	18.7867
2019-01-12 03:15:00	3.41	150.638	3.257	137.361	3.257	132.595	2.645	97.711	-11.44	877.438	17.3789
2019-01-12 03:30:00	3.869	134.749	4.328	116.107	3.716	110.114	2.798	89.71	-11.224	877.438	13.6761
2019-01-12 03:45:00	3.716	142.917	4.328	129.333	3.563	119.318	3.104	95.842	-11.349	877.345	10.153
2019-01-12 04:00:00	3.41	140.102	3.563	122.382	3.104	103.802	2.186	97.404	-11.363	877.611	11.5747
2019-01-12 04:15:00	3.104	149.741	2.492	129.066	1.88	109.831	1.504	92.009	-11.44	877.677	8.39107
2019-01-12 04:30:00	2.339	153.853	2.492	127.685	2.339	104.002	0.669	74.824	-11.027	877.877	8.01093
2019-01-12 04:45:00	3.104	161.998	2.798	141.486	2.798	132.03	2.339	109.625	-11.115	877.638	8.67287
2019-01-12 05:00:00	2.645	153.093	2.798	128.211	1.88	122.006	1.504	96.089	-11.007	877.691	10.3456
2019-01-12 05:15:00	2.339	140.079	3.104	123.923	2.339	112.412	1.657	89.098	-10.878	877.518	7.29507
2019-01-12 05:30:00	1.727	143.72	1.727	119.682	1.421	105.318	1.574	84.582	-10.987	877.678	5.96493
2019-01-12 05:45:00	2.492	171.975	2.492	142.177	2.645	135.477	2.186	113.403	-10.98	877.518	5.11187
2019-01-12 06:00:00	2.033	135.971	2.492	117.629	2.798	113.103	1.657	85.607	-10.753	877.385	5.74753
2019-01-12 06:15:00	0.446	110.776	1.574	119.407	1.657	105.625	1.045	101.683	-11.745	877.425	4.60273
2019-01-12 06:30:00	1.115	80.432	0.446	118.87	2.186	107.113	1.727	91.952	-13.283	877.132	2.604
2019-01-12 06:45:00	0	65.288	0	115.009	0.446	101.887	0.669	90.7	-13.903	877.305	0.0936
2019-01-12 07:00:00	0	65.279	0	130.831	0	102.064	1.115	84.54	-14.126	877.212	0.522333
2019-01-12 07:15:00	0	65.284	0	130.815	0	102.095	1.268	93.038	-14.398	876.946	1.17707
2019-01-12 07:30:00	0	65.295	0	130.778	0	102.041	0.223	84.597	-14.662	877.026	0.513467
2019-01-12 07:45:00	0	65.275	0	130.775	0	102.045	0	94.87	-14.337	877.412	1.38407
2019-01-12 08:00:00	0	73.29	0.446	130.698	0	102.024	0.669	79.821	-13.653	877.199	2.25713
2019-01-12 08:15:00	0.223	132.134	0	130.705	0	102.064	2.033	94.982	-13.161	877.292	2.55207
2019-01-12 08:30:00	0.446	130.212	0.669	119.32	1.045	102.966	1.421	97.2	-13.1	877.438	4.6424
2019-01-12 08:45:00	1.88	77.574	2.033	91.527	1.88	93.771	1.421	86.098	-14.184	877.784	4.4362
2019-01-12 09:00:00	0	120.164	0.599	91.26	0.822	93.713	2.186	79.082	-14.736	877.837	2.70973
2019-01-12 09:15:00	0	120.15	0	91.343	0.446	80.053	1.198	86.015	-14.764	877.89	2.26047
2019-01-12 09:30:00	0	120.149	0.446	104.343	0.669	98.687	1.657	91.578	-15.292	877.957	2.49133
2019-01-12 09:45:00	0	120.143	0	122.401	0.446	107.163	1.421	77.939	-14.899	877.957	3.26667
2019-01-12 10:00:00	0	120.164	0.446	120.701	0.822	113.111	1.268	91.863	-14.98	878.063	6.6768
2019-01-12 10:15:00	0	103.627	0.446	124.287	2.033	114.925	2.339	91.726	-14.137	878.196	9.12053
2019-01-12 10:30:00	0	103.608	1.268	118.078	2.033	101.411	1.574	90.615	-13.497	878.662	7.984
2019-01-12 10:45:00	0	103.601	0	121.824	1.045	115.994	1.727	99.898	-13.029	879.353	8.40127
2019-01-12 11:00:00	0	103.579	0	118.963	1.421	115.294	1.88	88.631	-13.653	880.031	7.8696
2019-01-12 11:15:00	3.155	129.278	3.92	125.378	2.39	106.586	1.625	101.971	-8.415	883.028	19.6067
2019-01-12 11:30:00	4.022	131.078	3.563	128.073	3.257	116.786	2.339	106.693	-7.88	883.263	17.3787
2019-01-12 11:45:00	3.104	110.132	3.41	111.825	3.563	99.619	2.033	99.909	-7.433	883.756	10.8467
2019-01-12 12:00:00	2.951	116.739	3.104	112.327	2.645	102.955	1.504	103.368	-6.877	884.115	5.70107
2019-01-12 12:15:00	2.645	134.188	1.81	137.977	2.645	134.957	2.798	115.533	-6.698	884.606	1.50833
2019-01-12 12:30:00	1.574	114.7	1.727	123.903	1.574	116.886	1.727	104.306	-5.831	884.939	0.1994
2019-01-12 12:45:00	0	327.296	0.223	270.049	0	99.808	0.223	118.477	-5.475	885.631	0
2019-01-12 13:00:00	0.223	338.525	0.446	234.987	0.446	118.996	1.045	109.253	-5.173	886.402	0
2019-01-12 13:15:00	0.599	145.275	1.574	142.427	1.88	137.207	0.975	83.636	-3.954	886.522	0
2019-01-12 13:30:00	1.727	167.263	1.88	157.574	2.186	148.122	1.88	76.923	-3.947	886.256	0
2019-01-12 13:45:00	0.223	189.59	0.669	177.498	0.669	159.415	0	75.561	-3.334	886.149	0
2019-01-12 14:00:00	0	248.808	0.446	241.935	0.669	214.171	0	163.901	-3.256	886.349	0
2019-01-12 14:15:00	1.045	288.819	1.88	284.171	2.033	264.891	1.045	199.291	-3.127	886.508	0.4326
2019-01-12 14:30:00	2.951	295.131	2.951	282.532	3.563	274.943	3.563	208.579	-3.517	886.335	2.454
2019-01-12 14:45:00	3.563	301.112	4.328	289.302	4.175	279.024	4.022	286.068	-3.53	885.95	6.22013
2019-01-12 15:00:00	3.104	289.892	3.716	279.596	4.175	274.152	3.716	283.601	-2.711	885.844	6.06973
2019-01-12 15:15:00	4.175	333.749	4.175	327.153	4.94	314.838	4.481	316.443	-1.938	885.937	4.16173
2019-01-12 15:30:00	4.634	346.113	4.94	338.332	4.94	324.817	5.246	327.183	-1.677	886.189	6.3588
2019-01-12 15:45:00	5.399	351.115	6.011	341.457	6.317	329.688	6.317	329.326	-2.226	886.109	6.65987
2019-01-12 16:00:00	4.175	343.984	4.481	339.47	4.787	327.9	4.634	326.971	-1.928	886.242	7.959
2019-01-12 16:15:00	5.399	342.491	5.399	339.36	5.858	329.217	5.399	328.34	-1.891	886.468	7.71447
2019-01-12 16:30:00	4.328	347.515	4.94	330.169	4.787	317.826	4.634	320.413	-1.552	886.415	10.3989
2019-01-12 16:45:00	5.399	344.446	5.552	333.668	5.399	320.687	5.246	321.01	-1.058	886.535	8.77
2019-01-12 17:00:00	4.634	340.583	4.787	339.384	5.093	325.353	5.093	324.324	-1.373	886.655	10.9082
2019-01-12 17:15:00	5.093	319.489	5.399	314.098	5.552	302.408	5.552	300.328	-1.139	886.907	16.8362
2019-01-12 17:30:00	4.94	306.313	5.552	300.104	5.246	289.466	5.552	289.156	-1.468	886.721	21.7761
2019-01-12 17:45:00	6.011	295.031	6.776	289.137	6.47	278.334	6.929	279.604	-1.965	886.495	28.2067
2019-01-12 18:00:00	6.623	275.159	7.082	277.522	7.082	268.571	6.929	270.852	-2.436	886.349	29.7278
2019-01-12 18:15:00	5.705	279.336	6.011	279.839	6.623	268.162	6.929	274.547	-2.772	886.335	37.0273
2019-01-12 18:30:00	5.858	282.976	6.164	276.169	6.317	267.135	6.623	271.017	-3.107	886.375	45.1647
2019-01-12 18:45:00	5.552	278.615	6.317	279.394	6.929	273.537	7.235	276.961	-3.49	886.508	63.7853
2019-01-12 19:00:00	6.929	278.148	7.694	279.781	8.153	275.794	8.306	279.823	-3.975	886.561	84.7737
2019-01-12 19:15:00	6.011	275.134	7.235	276.052	7.694	266.983	8.153	271.182	-4.554	886.442	103.277
2019-01-12 19:30:00	6.776	278.897	7.847	283.634	7.847	276.133	8.306	258.879	-4.568	886.269	120.073
2019-01-12 19:45:00	7.694	278.009	8.459	280.578	9.224	277.046	9.989	261.495	-4.621	886.482	129.097
2019-01-12 20:00:00	7.235	283.112	7.541	283.597	8.153	278.472	9.071	263.305	-4.74	886.548	128.957
2019-01-12 20:15:00	6.47	281.341	7.847	283.134	8.612	276.344	9.071	261.295	-4.72	886.362	135.111
2019-01-12 20:30:00	6.623	290.297	7.847	285.129	8.918	279.796	9.377	262.263	-4.859	886.242	149.838
2019-01-12 20:45:00	8.918	301.464	10.448	298.344	11.213	289.89	11.213	272.356	-4.672	886.389	164.419
2019-01-12 21:00:00	9.224	304.472	11.213	297.063	11.519	284.664	11.825	266.511	-4.625	886.349	167.746
2019-01-12 21:15:00	9.377	307.291	10.601	298.356	11.366	290.153	12.59	271.158	-4.523	886.455	169.426
2019-01-12 21:30:00	8.612	296.801	9.836	291.042	10.448	281.537	11.366	264.434	-4.737	886.641	170.568
2019-01-12 21:45:00	8.765	294.049	9.53	286.841	9.377	275.524	9.836	256.152	-4.625	886.961	151.874
2019-01-12 22:00:00	7.847	304.291	8.459	298.463	9.377	288.147	9.836	264.891	-4.984	887.054	143.839
2019-01-12 22:15:00	8.765	302.983	9.683	296.1	9.989	287.457	10.295	267.49	-5.214	887.094	136.597
2019-01-12 22:30:00	8.612	295.397	9.683	292.622	10.601	282.193	11.06	260.458	-5.336	886.947	130.551
2019-01-12 22:45:00	8.306	297.742	9.683	291.425	9.836	278.437	10.754	262.05	-5.414	887.134	123.307
2019-01-12 23:00:00	8	298.022	9.989	293.885	10.448	285.927	11.213	263.281	-5.471	887.187	123.773
2019-01-12 23:15:00	9.53	300.99	9.989	296.881	10.601	286.485	10.754	266.919	-5.973	887.506	124.192
2019-01-12 23:30:00	8.918	287.739	9.53	287.353	10.448	281.097	10.754	264.322	-6.352	887.479	118.954
2019-01-12 23:45:00	8.153	283.254	9.224	283.543	10.907	276.899	11.213	248.185	-6.485	887.719	118.87
2019-01-13 00:00:00	7.082	290.222	8	284.549	9.53	274.353	10.601	247.612	-6.783	887.799	118.917
2019-01-13 00:15:00	9.224	292.387	9.683	288.132	10.448	278.964	11.213	247.065	-6.271	887.719	117.669
2019-01-13 00:30:00	9.224	295.461	9.683	291.284	10.295	282.593	10.601	249.673	-5.197	887.839	117.506
2019-01-13 00:45:00	9.989	298.839	11.06	290.508	11.672	279.892	12.284	244.848	-4.73	888.104	117.688
2019-01-13 01:00:00	7.541	304.566	9.071	298.499	9.071	287.26	9.683	262.448	-4.713	888.53	120.198
2019-01-13 01:15:00	7.541	319.564	8.459	304.188	8.765	292.805	9.071	266.401	-6.366	888.49	122.846
2019-01-13 01:30:00	8.459	302.591	8.918	293.056	9.53	283.535	9.989	258.554	-6.555	888.144	128.863
2019-01-13 01:45:00	7.082	310.856	8.918	295.127	9.377	284.159	9.683	259.409	-6.901	887.972	132.83
2019-01-13 02:00:00	8.153	294.87	9.224	290.718	9.836	279.588	10.142	251.96	-6.911	887.852	138.568
2019-01-13 02:15:00	8	311.112	8.459	303.275	8.765	292.572	8.918	262.492	-7.142	888.224	140.041
2019-01-13 02:30:00	6.929	299.465	8.153	296.382	8.765	289.092	9.683	258.241	-7.206	888.317	143.493
2019-01-13 02:45:00	7.388	293.264	8	290.574	8.612	286.969	9.224	251.097	-7.179	888.384	136.14
2019-01-13 03:00:00	7.541	284.894	8.459	277.188	9.071	271.318	9.224	245.528	-6.956	888.477	120.875
2019-01-13 03:15:00	8	282.712	8.765	277.821	9.989	269.463	10.754	237.159	-6.857	888.676	118.085
2019-01-13 03:30:00	8.918	287.236	9.53	282.445	10.142	275.743	10.907	243.563	-6.928	888.77	118.204
2019-01-13 03:45:00	10.142	279.61	11.213	276.49	11.519	268.701	11.825	236.972	-6.979	888.929	118.419
2019-01-13 04:00:00	10.295	280.793	11.978	282.867	12.437	272.057	13.508	239.58	-7.013	889.049	119.263
2019-01-13 04:15:00	10.448	285.259	11.672	282.605	12.437	274.691	12.896	243.394	-6.729	889.368	120.858
2019-01-13 04:30:00	10.907	287.164	12.437	281.631	13.049	274.28	14.426	242.808	-6.403	889.235	122.298
2019-01-13 04:45:00	9.836	288.723	11.06	279.068	11.978	272.563	12.131	236.067	-6.115	889.275	127.028
2019-01-13 05:00:00	9.071	288.954	10.601	284.145	10.754	273.413	11.213	244.023	-6.18	889.288	126.649
2019-01-13 05:15:00	9.53	288.218	9.989	284.186	11.213	275.05	11.978	249.47	-5.739	889.541	118.759
2019-01-13 05:30:00	10.907	285.422	11.825	282.337	12.437	272.238	13.049	242.736	-5.587	889.315	118.644
2019-01-13 05:45:00	8.459	298.808	9.836	296.957	10.295	285.351	10.907	252.977	-6.013	889.701	118.601
2019-01-13 06:00:00	9.989	294.099	12.284	297.637	12.59	286.97	13.049	255.823	-6.64	889.421	118.441
2019-01-13 06:15:00	9.377	296.932	10.907	292.061	11.366	279.144	11.825	247.628	-7.193	889.222	118.36
2019-01-13 06:30:00	8.306	296.917	9.683	295.478	10.754	281.047	11.519	247.441	-7.318	889.156	119.022
2019-01-13 06:45:00	8.765	293.071	10.907	291.081	12.284	282.616	13.202	252.761	-6.511	889.142	118.889
2019-01-13 07:00:00	10.295	293.12	11.825	286.54	12.896	280.718	13.202	247.861	-5.824	889.262	118.949
2019-01-13 07:15:00	9.377	294.152	10.601	292.089	12.284	282.274	13.202	251.917	-6.088	889.488	120.16
2019-01-13 07:30:00	7.235	294.684	8.918	296.524	8.918	286.004	9.53	255.674	-6.261	889.794	119.116
2019-01-13 07:45:00	7.082	304.197	8	298.123	8.459	286.416	8.918	259.454	-6.512	890.006	118.473
2019-01-13 08:00:00	5.399	311.587	6.776	303.777	6.929	291.202	7.082	260.745	-7.656	890.232	118.615
2019-01-13 08:15:00	7.082	305.663	8.153	299.667	8.459	287.793	9.071	256.211	-7.392	890.033	118.421
2019-01-13 08:30:00	7.541	298.255	8.612	294.127	9.224	281.696	9.683	252.556	-7.145	889.834	122.943
2019-01-13 08:45:00	7.847	297.092	9.377	292.511	9.836	281.723	9.683	252.332	-7.186	889.714	139.255
2019-01-13 09:00:00	7.541	293.429	9.224	291.273	9.989	281.451	10.907	252.458	-7.43	889.78	132.933
2019-01-13 09:15:00	7.388	297.273	8.306	293.607	8.918	282.308	10.142	254.602	-7.379	889.807	117.306
2019-01-13 09:30:00	7.847	300.747	8.918	297.423	9.071	285.961	9.53	256.318	-7.528	889.887	110.702
2019-01-13 09:45:00	7.388	305.432	8.612	299.681	9.071	289.704	9.377	262.011	-7.714	889.833	116.386
2019-01-13 10:00:00	7.388	297.282	8.459	295.629	8.612	283.826	9.224	255.924	-7.775	890.099	115.729
2019-01-13 10:15:00	5.705	293.54	7.541	294.129	8.306	281.582	8.153	254.701	-7.914	890.139	120.008
2019-01-13 10:30:00	6.623	290.332	8.612	293.908	9.224	286.173	9.377	260.854	-7.803	890.232	126.232
2019-01-13 10:45:00	7.541	284.547	8	285.771	9.224	279.69	8.918	253.349	-7.569	890.339	98.0305
2019-01-13 11:00:00	6.929	282.638	7.541	277.772	8.153	272.269	9.224	248.969	-7.399	890.525	96.5405
2019-01-13 11:15:00	6.776	273.246	7.847	274.118	7.847	264.656	8.612	233.402	-7.416	890.964	96.81
2019-01-13 11:30:00	7.541	279.585	7.847	280.641	7.694	273.922	8.612	239.178	-6.61	890.818	95.6107
2019-01-13 11:45:00	7.388	292.619	7.541	283.601	8.459	275.77	8.918	244.87	-5.855	891.19	97.1929
2019-01-13 12:00:00	6.47	292.739	7.847	285.502	7.541	274.191	7.541	255.889	-5.519	891.31	90.7771
2019-01-13 12:15:00	7.082	292.849	8.153	283.981	8.153	275.164	8.612	259.206	-4.506	891.35	89.6853
2019-01-13 12:30:00	7.541	285.494	8.153	286.073	8.459	271.458	8.918	234.046	-3.392	891.549	100.147
2019-01-13 12:45:00	8	287.816	9.377	283.943	9.53	271.065	9.836	242.392	-3.341	892.134	101.639
2019-01-13 13:00:00	8.306	283.028	8.765	277.899	9.224	269.51	9.836	239.276	-3.192	891.921	96.2069
2019-01-13 13:15:00	6.317	296.187	7.694	290.036	8.306	276.982	8.306	239.727	-2.704	891.881	105.102
2019-01-13 13:30:00	8	292.083	9.377	283.241	9.683	275.901	10.295	244.425	-2.68	891.802	105.861
2019-01-13 13:45:00	9.071	302.481	9.53	294.961	9.53	284.963	10.142	243.623	-2.802	891.669	105.453
2019-01-13 14:00:00	8.612	292.301	9.53	283.857	9.683	271.546	9.53	249.026	-2.423	891.549	114.307
2019-01-13 14:15:00	8	305.395	8.612	297.074	8.153	288.505	8.612	259.374	-2.602	891.204	113.886
2019-01-13 14:30:00	8.918	304.843	8.765	297.72	9.377	286.139	8.918	265.542	-2.985	891.31	112.853
2019-01-13 14:45:00	7.541	302.454	8.153	293.197	9.071	281.975	9.989	260.08	-3.094	890.898	117.743
2019-01-13 15:00:00	8.459	300.181	8.918	293.541	9.683	285.358	9.377	259.002	-2.954	890.751	122.082
2019-01-13 15:15:00	7.694	290.624	8.612	290.208	9.071	279.389	8.459	256.357	-2.721	890.631	132.348
2019-01-13 15:30:00	9.377	298.713	10.448	294.997	10.448	281.514	10.142	252.977	-2.687	890.738	133.5
2019-01-13 15:45:00	9.224	298.119	10.295	286.945	10.601	278.828	10.907	255.114	-3.128	890.618	116.571
2019-01-13 16:00:00	9.53	290.864	9.989	285.467	10.601	275.716	11.213	247.229	-2.863	890.445	90.5554
2019-01-13 16:15:00	10.601	283.447	10.754	278.991	10.601	272.002	10.601	243.447	-2.64	890.618	66.185
2019-01-13 16:30:00	9.836	289.436	11.06	286.323	11.978	275.783	11.978	253.36	-2.653	890.645	81.0659
2019-01-13 16:45:00	11.06	292.604	11.06	283.217	11.213	272.452	11.213	242.543	-2.914	890.379	102.915
2019-01-13 17:00:00	10.601	299.205	11.366	287.476	11.825	277.891	11.519	237.807	-2.971	890.591	111.762
2019-01-13 17:15:00	9.683	294.761	11.213	284.955	11.366	275.929	11.366	245.607	-3.158	890.499	106.784
2019-01-13 17:30:00	10.907	295.509	11.825	288.947	11.825	280.945	11.978	260.654	-3.625	890.418	118.221
2019-01-13 17:45:00	10.601	296.245	11.672	294.185	12.131	282.339	12.59	263.009	-4.256	890.152	118.488
2019-01-13 18:00:00	10.295	295.424	11.366	295.153	11.825	284.809	12.59	253.854	-5.136	890.126	118.444
2019-01-13 18:15:00	10.142	297.245	10.601	295.516	11.06	287.27	11.366	273.553	-5.831	890.086	120.251
2019-01-13 18:30:00	9.836	294.38	11.06	290.048	11.978	283.738	11.825	260.759	-6.267	889.833	121.699
2019-01-13 18:45:00	8	296.971	9.071	295.61	9.683	283.688	9.683	264.171	-6.617	890.073	122.212
2019-01-13 19:00:00	8.918	300.76	10.142	295.114	10.601	288.206	10.907	263.991	-6.898	890.099	119.01
2019-01-13 19:15:00	9.224	294.28	10.142	295.315	10.754	284.1	11.519	266.612	-7.145	890.152	120.595
2019-01-13 19:30:00	7.541	297.235	8.459	292.158	9.53	283.187	9.989	276.338	-7.321	890.126	125.165
2019-01-13 19:45:00	7.235	287.87	8.765	282.93	9.53	273.325	9.836	264.295	-7.528	890.219	123.931
2019-01-13 20:00:00	6.776	288.065	7.541	286.924	8.918	277.873	9.377	275.943	-7.579	890.339	106.706
2019-01-13 20:15:00	5.705	282.296	6.929	280.124	7.082	270.476	7.541	270.126	-7.704	890.512	78.8216
2019-01-13 20:30:00	6.623	273.614	7.235	277.476	7.235	267.737	8	262.472	-7.69	890.405	54.8779
2019-01-13 20:45:00	5.858	271.346	6.47	273.822	6.776	266.073	7.082	267.428	-7.88	890.365	35.9259
2019-01-13 21:00:00	4.481	270.304	5.399	272.928	5.399	269.969	6.47	273.805	-8.07	890.511	27.9919
2019-01-13 21:15:00	3.716	286.313	5.093	283.938	4.787	280.647	5.246	277.095	-8.144	890.618	20.4175
2019-01-13 21:30:00	3.41	283.69	4.328	283.24	4.175	275.516	4.634	274.076	-8.101	890.525	14.6638
2019-01-13 21:45:00	3.869	280.694	3.869	286.417	4.328	282.574	4.634	284.703	-8.246	890.538	7.84827
2019-01-13 22:00:00	3.41	258.496	3.869	274.463	4.022	267.764	3.563	270.989	-8.426	890.645	4.69453
2019-01-13 22:15:00	3.41	264.874	3.869	271.007	3.869	268.348	4.022	266.995	-8.121	890.578	2.95827
2019-01-13 22:30:00	3.104	267.621	3.716	278.188	3.563	267.923	3.869	272.311	-8.368	890.525	1.64887
2019-01-13 22:45:00	2.492	266.316	3.104	281.766	3.257	275.137	3.41	276.586	-8.639	890.538	0.578667
2019-01-13 23:00:00	0.975	88.242	0.599	262.041	2.033	265.851	2.492	266.343	-10.14	890.458	0.022667
2019-01-13 23:15:00	1.88	89.609	0	258.321	0.599	245.32	2.645	239.482	-11.197	890.405	0
2019-01-13 23:30:00	2.645	116.186	1.727	96.066	1.574	120.296	0.669	230.952	-11.309	890.232	0
2019-01-13 23:45:00	3.104	133.923	2.492	106.552	2.339	92.396	1.88	95.102	-10.838	890.219	0
2019-01-14 00:00:00	3.869	146.062	3.563	111.253	2.492	101.337	2.339	114.065	-10.851	890.405	0
2019-01-14 00:15:00	2.645	130.694	2.798	106.599	2.186	93.385	2.339	98.729	-10.546	890.299	0
2019-01-14 00:30:00	2.492	135.742	2.033	107.507	2.033	79.716	1.88	86.065	-10.445	890.339	0
2019-01-14 00:45:00	2.492	142.523	1.88	114.448	2.339	94.888	2.186	90.443	-10.536	890.405	0
2019-01-14 01:00:00	3.41	152.419	2.951	114.831	1.88	98.785	2.186	99.833	-10.682	890.272	0
2019-01-14 01:15:00	2.951	132.853	2.492	106.155	2.339	99.261	2.339	83.955	-10.506	890.232	0.328
2019-01-14 01:30:00	2.033	114.122	2.339	114.462	2.339	93.596	2.339	90.321	-10.634	890.206	0.657
2019-01-14 01:45:00	0	79.092	0.822	115.821	2.033	97.724	2.339	90.171	-12.863	890.153	1.3004
2019-01-14 02:00:00	0.975	142.369	1.045	102.55	1.421	83.115	2.492	69.881	-11.474	889.794	2.10833
2019-01-14 02:15:00	0	97.457	0.892	104.055	1.351	98.002	0.975	100.142	-12.128	889.594	1.89767
2019-01-14 02:30:00	0	358.389	0	111.148	0	95.407	1.351	82.153	-13.28	889.435	2.23253
2019-01-14 02:45:00	0	296.425	0	111.124	0	80.255	0.892	75.983	-13.612	889.368	2.33567
2019-01-14 03:00:00	0	292.08	0	140.624	0	81.334	0.223	85.176	-13.707	889.049	3.8754
2019-01-14 03:15:00	0	292.12	0	257.841	0	81.358	0.446	94.893	-14.012	888.889	3.6206
2019-01-14 03:30:00	0	292.121	0	257.927	0	81.335	0	85.646	-13.785	888.636	6.90687
2019-01-14 03:45:00	1.115	273.674	0	257.891	0	81.371	0.446	89.974	-13.761	888.716	9.31307
2019-01-14 04:00:00	0.669	282.559	0.669	257.907	0	81.348	0	85.701	-14.032	888.477	12.2585
2019-01-14 04:15:00	0.446	282.567	0	257.912	0	81.325	0	77.479	-14.184	888.49	14.8044
2019-01-14 04:30:00	1.727	273.662	1.115	257.985	1.574	81.37	0	85.343	-14.042	888.636	14.9413
2019-01-14 04:45:00	1.574	291.472	1.268	280.346	1.268	179.724	0.446	130.156	-14.208	888.317	21.4372
2019-01-14 05:00:00	1.88	277.9	1.88	280.012	0.892	241.722	0.669	118.271	-14.225	888.171	29.751
2019-01-14 05:15:00	1.727	274.314	1.421	263.775	1.574	239.981	0.669	119.122	-14.334	887.878	33.1488
2019-01-14 05:30:00	2.339	281.702	2.645	257.392	1.198	232.024	0	112.22	-14.357	887.613	37.8131
2019-01-14 05:45:00	2.798	293.133	2.186	284.284	2.033	232.543	0	64.147	-14.648	887.386	48.6407
2019-01-14 06:00:00	2.645	265.953	2.186	261.189	0.223	101.934	0.376	100.82	-14.74	887.041	75.0695
2019-01-14 06:15:00	2.033	279.483	1.727	250.367	0	84.171	0.822	96.827	-14.93	886.801	95.7549
2019-01-14 06:30:00	2.033	277.486	2.186	158.339	0	66.023	1.045	80.346	-14.784	886.641	108.036
2019-01-14 06:45:00	2.033	267.652	0	87	0.446	87.76	3.104	90.66	-13.954	886.442	114.649
2019-01-14 07:00:00	1.727	273.1	0.223	73.663	1.81	85.147	3.869	101.187	-13.747	886.335	124.114
2019-01-14 07:15:00	1.574	264.133	0.669	129.281	2.116	101.12	5.246	104.554	-14.902	886.468	127.839
2019-01-14 07:30:00	7.541	131.579	9.071	130.428	6.623	120.372	6.317	118.984	-8.209	886.176	127.266
2019-01-14 07:45:00	6.776	135.801	9.377	125.347	7.082	117.988	6.317	123.369	-7.179	886.881	123.626
2019-01-14 08:00:00	7.847	125.803	6.776	123.306	6.929	121.161	8.612	121.023	-7.931	887.213	114.589
2019-01-14 08:15:00	8.459	132.418	10.142	130.141	9.989	125.085	9.53	114.651	-5.204	887.307	95.2115
2019-01-14 08:30:00	6.776	128.048	9.53	131.29	9.836	125.42	8.918	118.213	-6.037	887.905	82.6657
2019-01-14 08:45:00	9.071	132.517	11.519	128.206	10.754	123.196	11.06	122.102	-5.313	887.772	74.0031
2019-01-14 09:00:00	8.612	136.469	11.519	123.987	11.366	118.624	11.366	114.558	-7.023	888.078	59.9419
2019-01-14 09:15:00	9.53	122.912	11.519	121.407	11.825	114.731	11.213	110.323	-8.348	887.945	53.7022
2019-01-14 09:30:00	9.836	117.42	11.825	119.612	11.366	108.664	12.743	110.346	-8.592	887.878	41.3589
2019-01-14 09:45:00	9.683	108.408	12.131	107.053	12.437	100.193	12.131	105.324	-8.703	887.825	34.7246
2019-01-14 10:00:00	9.53	104.39	12.437	103.522	12.437	99.803	12.284	104.27	-8.473	887.772	33.0467
2019-01-14 10:15:00	10.754	107.124	12.284	102.759	12.437	95.744	12.59	100.524	-8.781	887.799	26.5824
2019-01-14 10:30:00	9.683	106.943	12.437	103.794	12.284	100.092	13.508	101.941	-9.079	887.746	26.7227
2019-01-14 10:45:00	12.131	100.049	14.426	106.345	14.732	99.523	15.65	107.601	-8.897	887.519	37.9845
2019-01-14 11:00:00	9.836	103.19	12.896	109.929	13.202	105.755	13.049	117.893	-8.558	887.599	50.7959
2019-01-14 11:15:00	10.295	110.297	12.284	117.466	13.049	116.186	14.426	119.063	-6.732	888.011	51.2986
2019-01-14 11:30:00	10.754	122.889	14.426	127.559	15.191	120.014	15.65	123.219	-4.323	888.463	54.6949
2019-01-14 11:45:00	13.814	136.919	15.191	134.072	16.415	127.2	18.251	127.824	-2.152	888.716	32.8713
2019-01-14 12:00:00	13.814	139.873	15.65	137.686	16.262	130.661	16.874	133.156	-2.609	889.235	22.603
2019-01-14 12:15:00	14.12	139.896	14.426	133.629	16.109	126.721	15.956	127.879	-2.569	889.661	25.1605
2019-01-14 12:30:00	11.825	138.395	13.814	135.986	14.885	128.536	16.109	130.85	-2.132	889.74	27.2289
2019-01-14 12:45:00	12.437	140.649	14.273	133.051	15.65	126.43	17.027	127.502	-2.061	889.847	26.2559
2019-01-14 13:00:00	14.579	138.336	15.038	135.958	15.956	129.854	15.956	130.948	-2.338	889.408	24.3797
2019-01-14 13:15:00	14.885	141.247	15.65	137.122	17.027	131.844	17.945	131.444	-2.586	889.049	24.8034
2019-01-14 13:30:00	13.814	142.242	16.568	138.208	17.486	129.908	18.863	132.191	-2.555	888.783	29.7595
2019-01-14 13:45:00	13.814	142.459	16.262	145.541	17.945	135.705	19.016	135.698	-3.06	888.649	44.9939
2019-01-14 14:00:00	15.038	149.455	16.721	144.833	17.486	131.432	17.792	135.126	-3.026	888.37	46.6477
2019-01-14 14:15:00	15.497	154.337	18.098	143.463	20.393	138.654	20.852	139.039	-3.246	888.011	54.1361
2019-01-14 14:30:00	15.65	148.643	17.792	147.47	19.322	137.07	19.322	137.461	-3.273	887.839	60.1086
2019-01-14 14:45:00	17.027	145.808	18.098	141.346	19.628	133.817	20.24	134.469	-3.507	887.48	59.1712
2019-01-14 15:00:00	15.191	152.142	16.874	145.689	18.098	137.533	18.863	137.037	-2.745	887.413	53.7429
2019-01-14 15:15:00	15.191	145.519	17.486	144.54	18.71	134.015	18.863	132.4	-3.398	887.333	50.9413
2019-01-14 15:30:00	15.344	152.488	16.874	147.164	17.639	138.898	18.863	139.137	-3.253	887.666	49.7202
2019-01-14 15:45:00	15.344	145.2	17.027	143.788	17.945	136.117	18.557	135.316	-3.256	887.2	42.8499
2019-01-14 16:00:00	13.202	148.12	16.568	146.059	17.18	135.491	17.945	137.845	-2.928	887.466	36.5995
2019-01-14 16:15:00	13.049	151.786	15.65	150.6	16.109	143.459	17.333	144.807	-3.077	887.506	38.9973
2019-01-14 16:30:00	14.12	154.205	16.262	146.962	17.18	140.228	18.557	140.668	-3.297	887.559	46.942
2019-01-14 16:45:00	14.732	151.085	15.65	155.087	17.945	143.437	19.016	144.138	-2.877	887.373	58.7983
2019-01-14 17:00:00	13.967	149.54	14.579	149.589	15.956	139.733	17.639	137.708	-3.148	887.546	75.2181
2019-01-14 17:15:00	13.355	149.001	15.803	145.88	15.803	139.8	17.18	140.775	-3.446	887.28	82.1065
2019-01-14 17:30:00	11.213	148.493	14.12	149.559	15.956	143.31	17.027	141.772	-3.646	887.652	71.7851
2019-01-14 17:45:00	13.661	154.004	15.956	149.941	16.109	142.685	17.027	146.573	-3.947	887.466	86.0136
2019-01-14 18:00:00	13.814	163.754	16.262	154.57	18.251	147.046	19.475	147.026	-4.642	887.254	101.96
2019-01-14 18:15:00	14.579	161.427	17.027	155.9	17.945	147.274	19.628	145.115	-4.77	886.934	102.501
2019-01-14 18:30:00	12.437	162.244	14.579	152.694	17.333	142.414	17.486	143.494	-5.045	886.774	102.288
2019-01-14 18:45:00	12.743	149.163	16.262	149.172	17.639	143.441	19.169	143.825	-4.906	886.721	102.664
2019-01-14 19:00:00	15.956	155.145	17.027	150.629	18.863	142.82	19.475	143.834	-5.187	886.269	102.791
2019-01-14 19:15:00	13.508	147.523	18.098	151.972	19.322	142.718	20.546	140.93	-5.502	886.522	103.188
2019-01-14 19:30:00	13.049	157.765	15.803	148.422	17.333	136.964	18.098	143.28	-5.451	886.774	103.496
2019-01-14 19:45:00	11.519	148.734	13.661	147.81	15.65	140.268	17.639	143.803	-5.441	886.908	103.54
2019-01-14 20:00:00	12.437	148.926	14.885	146.787	15.956	135.213	16.568	135.35	-5.428	887.24	102.813
2019-01-14 20:15:00	12.59	149.348	14.885	145.903	15.803	137.001	16.874	140.783	-5.309	887.373	103.402
2019-01-14 20:30:00	12.284	148.905	14.885	149.225	15.803	140.982	17.333	140.956	-5.028	887.28	102.459
2019-01-14 20:45:00	13.508	147.016	14.426	138.954	15.803	134.13	16.874	136.761	-5.471	887.267	101.584
2019-01-14 21:00:00	13.049	155.122	15.803	150.491	16.721	141.069	17.945	140.618	-5.41	887.121	103.973
2019-01-14 21:15:00	11.978	160.479	14.273	148.301	16.262	140.437	17.945	141.622	-5.601	887.32	105.877
2019-01-14 21:30:00	11.978	155.191	13.967	156.396	15.038	145.954	16.874	142.845	-5.434	887.253	104.279
2019-01-14 21:45:00	11.366	154.331	13.967	154.92	13.508	145.683	14.273	147.883	-5.708	887.559	103.48
2019-01-14 22:00:00	10.601	156.191	12.437	153.165	15.038	142.714	15.803	144.619	-5.787	887.639	97.586
2019-01-14 22:15:00	10.754	149.883	13.049	146.887	14.273	140.423	14.732	136.087	-5.682	887.413	91.4963
2019-01-14 22:30:00	9.683	163.878	11.366	161.306	13.049	148.589	14.885	150.925	-5.539	887.493	84.9585
2019-01-14 22:45:00	9.224	146.858	11.366	140.649	11.366	134.523	12.131	136.375	-5.604	887.746	83.8456
2019-01-14 23:00:00	10.907	155.945	12.131	152.308	13.814	142.101	15.038	145.542	-5.279	887.652	82.9617
2019-01-14 23:15:00	10.295	156.925	12.131	147.441	13.508	138.321	14.426	136.635	-5.333	887.639	76.391
2019-01-14 23:30:00	11.06	149.29	13.814	149.737	13.661	143.531	14.732	141.993	-5.16	887.599	78.8935
2019-01-14 23:45:00	11.519	144.958	12.896	149.338	13.814	135.26	14.273	135.181	-5.207	887.613	71.3123
2019-01-15 00:00:00	11.672	152.555	13.814	144.38	14.732	139.616	15.497	139.913	-5.075	887.533	68.0077
2019-01-15 00:15:00	13.355	152.839	15.191	145.37	16.415	136.342	18.251	136.895	-5.011	887.067	89.2713
2019-01-15 00:30:00	11.978	152.607	15.497	147.947	15.956	138.493	18.557	139.688	-5.163	887.293	112.333
2019-01-15 00:45:00	12.284	143.358	14.12	144.477	14.579	135.016	14.732	132.054	-5.183	887.227	130.298
2019-01-15 01:00:00	11.366	142.394	13.355	141.183	13.508	134.865	14.12	133.679	-5.052	887.147	97.9711
2019-01-15 01:15:00	10.295	139.878	12.437	136.893	13.049	128.654	13.202	129.671	-5.248	887.147	99.3489
2019-01-15 01:30:00	9.53	138.853	11.519	139.699	12.284	128.317	13.355	131.518	-5.231	887.293	123.725
2019-01-15 01:45:00	10.601	140.508	12.284	137.899	12.284	131.213	12.131	130.791	-5.221	887.067	143.313
2019-01-15 02:00:00	10.601	143.993	13.355	140.523	13.814	132.93	13.508	132.902	-5.129	887.094	144.074
2019-01-15 02:15:00	9.989	138.842	12.437	137.566	12.896	124.263	13.049	127.446	-5.411	886.934	149.226
2019-01-15 02:30:00	8.918	143.893	11.06	140.338	12.131	133.496	12.896	134.715	-5.387	886.947	145.918
2019-01-15 02:45:00	9.836	141.652	11.366	143.017	12.284	135.165	13.508	132.507	-5.485	886.548	111.779
2019-01-15 03:00:00	10.448	139.934	11.366	140.957	11.978	135.163	13.049	135.103	-5.346	886.375	113.323
2019-01-15 03:15:00	9.989	145.242	11.519	144.945	12.59	137.472	14.273	136.615	-5.268	886.322	136.552
2019-01-15 03:30:00	9.224	135.598	10.907	139.841	11.825	129.024	13.202	133.243	-5.268	886.176	131.756
2019-01-15 03:45:00	9.53	128.98	10.295	130.568	10.142	124.738	11.978	127.127	-5.407	885.844	134.537
2019-01-15 04:00:00	9.836	131.257	10.601	124.186	9.836	116.183	9.224	117.135	-5.509	885.91	135.213
2019-01-15 04:15:00	8	125.45	8.612	124.547	7.847	123.809	8.918	126.499	-5.682	886.096	132.792
2019-01-15 04:30:00	7.694	115.629	9.071	110.318	8.459	110.267	7.235	112.513	-6.705	885.87	115.652
2019-01-15 04:45:00	7.541	115.714	8.918	109.561	8.765	107.895	7.235	116.242	-6.833	885.844	107.285
2019-01-15 05:00:00	7.847	115.345	8.459	125.498	8.459	119.998	10.295	125.413	-7.02	885.538	103.721
2019-01-15 05:15:00	6.929	118.994	9.377	115.538	7.541	110.5	6.011	121.07	-7.067	885.498	100.004
2019-01-15 05:30:00	7.541	117.903	8.918	117.719	7.541	110.536	7.388	112.591	-6.84	885.405	101.662
2019-01-15 05:45:00	9.989	120.264	10.754	123.989	9.071	113.066	9.224	108.472	-5.844	885.272	98.2435
2019-01-15 06:00:00	8.306	112.357	9.683	112.226	11.213	105.842	10.907	105.207	-6.332	885.245	107.325
2019-01-15 06:15:00	9.377	105.266	11.672	105.92	11.06	99.736	10.907	101.874	-8.056	885.032	106.552
2019-01-15 06:30:00	9.836	112.053	12.131	107.988	13.967	97.873	13.661	102.49	-8.172	884.513	103.505
2019-01-15 06:45:00	10.754	112.183	12.896	107.524	13.355	99.046	13.355	102.014	-8.219	884.354	92.8672
2019-01-15 07:00:00	9.377	108.887	11.213	111.714	12.437	101.76	13.049	104.717	-8.713	884.46	99.9423
2019-01-15 07:15:00	9.836	110.124	11.978	110.638	12.896	102.185	13.508	102.79	-8.327	884.234	99.8756
2019-01-15 07:30:00	10.601	110.304	12.743	107.887	13.049	99.056	12.896	101.109	-8.88	884.101	99.0609
2019-01-15 07:45:00	10.754	116.239	13.508	111.922	13.967	102.628	13.049	104.27	-8.578	884.115	101.727
2019-01-15 08:00:00	9.989	115.632	12.284	114.623	13.202	102.73	13.202	104.503	-8.507	884.075	92.4606
2019-01-15 08:15:00	11.06	114.126	12.896	113.252	13.661	103.962	13.202	104.706	-8.51	884.234	64.659
2019-01-15 08:30:00	10.448	110.959	13.661	112.705	15.038	103.488	15.191	105.713	-8.422	884.021	60.2373
2019-01-15 08:45:00	9.224	109.598	12.284	108.528	13.508	103.482	15.344	105.179	-8.795	884.168	68.145
2019-01-15 09:00:00	10.754	111.384	13.508	109.072	14.426	99.132	14.579	101.409	-9.255	883.862	49.8019
2019-01-15 09:15:00	9.683	104.099	12.284	108.145	13.355	101.456	14.12	106.847	-9.588	883.968	54.0467
2019-01-15 09:30:00	10.601	101.991	13.508	107.053	14.12	101.199	13.814	105.239	-10.224	883.676	57.554
2019-01-15 09:45:00	11.213	107.816	14.426	106.065	15.497	97.996	15.65	102.006	-9.788	883.516	60.3925
2019-01-15 10:00:00	11.519	102.524	14.12	106.042	15.497	98.839	15.65	103.206	-10.089	883.277	63.5761
2019-01-15 10:15:00	10.601	103.603	13.355	107.649	13.967	99.131	14.273	102.16	-10.085	883.463	63.1687
2019-01-15 10:30:00	11.366	102.048	13.508	102.958	13.661	94.455	14.579	98.898	-9.838	883.383	72.6182
2019-01-15 10:45:00	11.825	103.382	14.12	101.341	15.191	96.943	16.262	98.275	-9.374	883.596	73.0498
2019-01-15 11:00:00	11.672	100.947	13.202	102.657	14.885	95.349	15.956	98.283	-8.815	883.742	68.7153
2019-01-15 11:15:00	11.672	105.24	13.967	101.509	14.273	95.409	15.191	99.454	-8.131	884.128	64.3688
2019-01-15 11:30:00	13.355	107.404	16.262	101.499	16.721	94.057	17.333	98.037	-7.772	883.929	50.3149
2019-01-15 11:45:00	12.743	104.421	14.732	102.843	15.803	95.773	17.333	100.358	-7.318	883.875	49.4751
2019-01-15 12:00:00	13.814	110.419	15.497	102.362	16.721	96.513	17.945	99.535	-6.783	883.889	53.6196
2019-01-15 12:15:00	13.814	111.195	15.65	103.249	17.027	94.544	17.792	96.697	-6.187	883.769	64.4102
2019-01-15 12:30:00	14.885	109.224	15.956	104.97	17.333	99.787	17.486	103.182	-5.882	883.769	69.0925
2019-01-15 12:45:00	15.65	111.324	17.18	110.904	18.098	98.874	19.016	102.92	-5.587	883.476	69.343
2019-01-15 13:00:00	15.803	111.967	17.945	108.433	17.945	99.166	19.169	102.077	-5.367	883.197	55.6528
2019-01-15 13:15:00	16.109	109.133	18.251	105.872	18.557	100.135	19.475	102.278	-5.194	882.971	49.2417
2019-01-15 13:30:00	16.568	113.004	18.863	112.708	19.169	101.118	19.475	101.578	-4.838	882.838	56.0323
2019-01-15 13:45:00	19.016	114.539	19.169	108.634	19.628	100.514	21.005	102.696	-4.889	882.505	52.4879
2019-01-15 14:00:00	17.027	118.231	19.322	113.191	19.322	103.61	19.322	104.957	-4.831	882.439	48.012
2019-01-15 14:15:00	15.803	114.857	18.098	113.626	18.557	103.622	20.24	106.771	-4.557	882.558	44.4018
2019-01-15 14:30:00	17.486	116.97	19.169	108.916	19.322	104.204	20.699	104.969	-4.703	882.199	37.0919
2019-01-15 14:45:00	15.956	120.185	18.71	113.825	18.557	102.899	19.016	105.888	-4.594	882.093	33.2638
2019-01-15 15:00:00	16.874	116.279	18.863	112.741	18.863	102.576	18.71	106.919	-4.564	881.76	31.8943
2019-01-15 15:15:00	16.721	120.47	18.557	115.265	19.322	106.022	19.016	109.714	-4.347	881.641	31.1742
2019-01-15 15:30:00	16.721	118.568	19.169	116.681	19.475	106.255	20.699	112.148	-4.486	881.468	31.5101
2019-01-15 15:45:00	15.038	117.846	17.486	119.892	17.639	110.634	18.863	113.292	-4.344	881.321	33.3014
2019-01-15 16:00:00	15.038	122.882	17.639	113.913	19.169	108.87	19.016	108.773	-4.12	881.282	23.9999
2019-01-15 16:15:00	14.579	118.655	16.109	117.401	17.486	108.451	18.251	110.027	-4.025	881.082	24.8805
2019-01-15 16:30:00	15.956	123.51	16.568	117.849	17.639	107.698	18.404	109.428	-4.147	880.909	28.2123
2019-01-15 16:45:00	15.803	113.206	18.557	113.122	19.016	105.472	19.781	106.23	-4.019	880.51	33.6997
2019-01-15 17:00:00	13.049	119.648	15.038	120.408	14.579	115.407	15.497	119.851	-3.531	880.909	42.0605
2019-01-15 17:15:00	13.202	128.453	14.426	129.315	15.803	121.487	15.038	124.528	-2.87	880.803	41.9282
2019-01-15 17:30:00	13.661	131.439	15.497	132.045	15.65	122.737	16.568	123.441	-2.863	880.776	53.9966
2019-01-15 17:45:00	12.131	130.759	15.038	127.964	15.65	121.007	15.956	123.995	-2.927	880.669	64.2999
2019-01-15 18:00:00	12.131	131.118	15.038	125.601	15.344	116.572	16.109	119.671	-2.951	880.59	68.5789
2019-01-15 18:15:00	12.437	123.166	15.038	124.531	16.262	115.658	17.333	121.011	-3.361	880.005	61.5203
2019-01-15 18:30:00	11.825	122.622	14.426	118.417	15.038	112.639	15.344	117.249	-3.432	879.952	41.9165
2019-01-15 18:45:00	13.661	118.326	15.038	120.448	15.65	112.548	16.874	118.113	-3.324	879.686	39.3746
2019-01-15 19:00:00	12.131	127.974	14.579	121.025	14.579	108.561	15.191	111.076	-2.972	879.646	40.085
2019-01-15 19:15:00	11.672	112.964	13.355	106.082	14.12	103.868	13.508	105.634	-4.625	879.513	40.1441
2019-01-15 19:30:00	13.049	104.012	15.497	109.134	15.803	104.024	16.415	109.227	-5.733	879.113	49.2136
2019-01-15 19:45:00	15.344	107.773	18.098	105.779	18.404	99.269	17.639	104.06	-6.607	878.887	79.7152
2019-01-15 20:00:00	15.191	106.624	17.639	110.809	18.098	104.634	17.486	107.596	-6.474	878.675	91.7587
2019-01-15 20:15:00	15.191	106.498	16.874	108.454	17.792	102.4	17.18	107.414	-6.678	878.715	94.3699
2019-01-15 20:30:00	13.814	106.313	16.109	107.182	18.098	101.713	17.945	106.779	-6.711	878.529	95.0116
2019-01-15 20:45:00	13.814	108.708	18.251	105.366	19.628	96.245	20.393	98.87	-6.877	878.582	99.5797
2019-01-15 21:00:00	15.803	114.047	19.169	108.771	20.699	99.479	21.005	101.308	-6.823	878.382	99.4193
2019-01-15 21:15:00	16.874	107.246	19.475	106.652	20.852	99.241	22.229	100.904	-6.932	878.21	95.253
2019-01-15 21:30:00	19.169	113.168	20.087	106.858	21.464	97.858	21.77	99.62	-6.993	878.103	92.9661
2019-01-15 21:45:00	15.191	118.16	19.475	110.943	22.076	98.826	23.453	99.691	-6.843	878.848	91.1515
2019-01-15 22:00:00	17.945	105.477	20.24	107.919	22.076	99.021	22.535	99.709	-6.816	878.316	91.5597
2019-01-15 22:15:00	17.792	110.251	19.934	107.966	21.617	97.715	23.3	100.294	-6.833	878.17	93.6323
2019-01-15 22:30:00	18.098	112.838	21.617	106.307	22.841	99.345	23.759	101.976	-6.803	878.462	91.8779
2019-01-15 22:45:00	17.333	109.412	20.852	109.716	22.076	101.959	23.147	102.03	-6.799	878.382	91.2315
2019-01-15 23:00:00	17.027	112.477	19.628	109.604	21.617	101.884	22.535	104.322	-6.962	878.263	91.9123
2019-01-15 23:15:00	18.71	109.795	20.24	107.912	21.617	98.858	21.923	102.515	-6.986	877.943	90.1422
2019-01-15 23:30:00	16.415	114.642	19.628	108.641	21.464	102.224	23.759	102.666	-7.06	878.05	91.5376
2019-01-15 23:45:00	17.18	114.26	20.393	110.491	21.617	103.732	22.535	104.099	-7.172	877.571	88.6306
2019-01-16 00:00:00	16.262	105.87	20.393	110.995	22.688	100.753	23.606	104.128	-7.155	877.438	81.0698
2019-01-16 00:15:00	17.18	114.68	20.546	105.87	22.229	100.153	23.912	102.069	-7.257	877.584	102.03
2019-01-16 00:30:00	18.71	115.189	21.617	107.053	22.229	104.358	23.606	106.099	-7.213	877.172	123.649
2019-01-16 00:45:00	18.404	108.749	21.005	109.62	22.382	99.758	23.3	102.41	-7.189	877.092	122.735
2019-01-16 01:00:00	17.486	115.67	19.781	107.406	21.005	100.091	22.382	105.657	-7.189	877.438	120.827
2019-01-16 01:15:00	16.415	111.292	17.792	105.339	20.699	100.925	22.994	102.407	-7.321	877.491	113.507
2019-01-16 01:30:00	18.557	111.051	21.158	106.782	23.147	97.665	23.912	100.858	-7.358	877.225	97.1617
2019-01-16 01:45:00	18.404	108.863	20.393	110.496	21.923	101.297	23.147	100.248	-7.294	877.425	90.9333
2019-01-16 02:00:00	16.415	112.347	18.404	107.31	21.005	99.876	22.841	101.164	-7.372	877.744	90.9084
2019-01-16 02:15:00	17.486	114.104	20.699	106.913	22.229	99.083	24.065	101.152	-7.348	877.637	92.0403
2019-01-16 02:30:00	17.333	111.38	19.628	108.985	22.382	103.032	23.453	101.056	-7.399	877.505	93.2174
2019-01-16 02:45:00	17.486	111.971	19.475	103.961	21.311	98.526	21.77	101.659	-7.508	877.279	93.781
2019-01-16 03:00:00	17.333	113.097	18.71	109.495	20.852	100.051	22.076	101.523	-7.67	877.305	93.9203
2019-01-16 03:15:00	14.885	112.428	19.016	108.4	21.77	99.91	21.923	102.722	-7.755	877.185	94.7099
2019-01-16 03:30:00	17.18	111.642	19.169	105.617	20.24	99.028	22.076	100.525	-7.86	877.026	96.7353
2019-01-16 03:45:00	15.038	106.79	16.874	103.841	18.557	98.967	20.852	100.145	-8.111	877.012	96.9053
2019-01-16 04:00:00	16.262	111.018	19.781	109.376	20.546	101.006	21.464	102.808	-8.144	877.372	100.258
2019-01-16 04:15:00	15.038	112.088	18.251	108.491	19.322	99.263	21.158	101.991	-8.151	877.199	100.996
2019-01-16 04:30:00	15.191	111.975	16.874	106.827	20.393	99.623	21.617	105.447	-8.144	877.238	102.846
2019-01-16 04:45:00	16.109	108.729	17.945	108.906	19.934	100.752	21.005	101.489	-8.08	877.172	104.349
2019-01-16 05:00:00	15.191	113.615	18.098	110.095	18.71	101.979	20.087	101.694	-7.904	877.212	107.668
2019-01-16 05:15:00	14.12	115.777	17.027	111.877	18.71	102.143	20.24	102.108	-7.803	877.092	109.137
2019-01-16 05:30:00	14.732	113.913	17.027	112.417	19.322	103.385	19.322	106.682	-7.904	877.066	108.717
2019-01-16 05:45:00	15.038	111.148	17.18	110.667	19.169	101.959	20.24	103.721	-7.643	877.398	109.873
2019-01-16 06:00:00	14.732	112.515	16.721	108.378	18.404	100.424	19.781	101.076	-7.83	877.558	109.868
2019-01-16 06:15:00	13.661	109.165	16.415	108.412	17.639	100.084	19.169	102.115	-7.823	877.465	104.231
2019-01-16 06:30:00	14.579	108.245	16.874	101.887	18.098	97.135	19.475	100.514	-7.643	877.718	106.576
2019-01-16 06:45:00	14.579	112.052	16.568	108.191	18.098	98.967	18.71	102.093	-7.803	877.491	107.137
2019-01-16 07:00:00	14.732	104.566	16.874	107.805	18.71	96.5	20.699	99.389	-7.718	877.318	98.929
2019-01-16 07:15:00	15.956	105.661	17.18	104.047	19.016	94.475	21.005	98.176	-7.772	877.238	95.1291
2019-01-16 07:30:00	14.579	104.836	17.333	103.204	17.945	93.904	19.322	97.898	-8.036	877.252	93.1816
2019-01-16 07:45:00	15.344	106.436	17.486	105.012	18.251	95.907	20.24	97.768	-8.385	877.052	89.7587
2019-01-16 08:00:00	14.732	111.263	17.18	105.094	18.251	98.325	19.475	100.171	-8.486	877.185	88.0019
2019-01-16 08:15:00	13.967	107.891	16.415	104.97	18.098	97.359	18.863	99.277	-8.446	877.066	87.2862
2019-01-16 08:30:00	13.508	101.681	15.344	100.452	17.027	93.748	18.251	96.137	-8.405	877.478	88.6567
2019-01-16 08:45:00	12.743	103.185	14.885	98.921	15.497	87.877	16.721	91.58	-8.28	878.183	89.5239
2019-01-16 09:00:00	11.978	107.931	14.12	102.101	15.65	94.677	16.721	97.029	-8.876	878.343	81.6413
2019-01-16 09:15:00	11.978	115.242	14.12	110.381	15.803	102.599	16.721	104.324	-9.008	878.249	97.2551
2019-01-16 09:30:00	11.519	117.846	14.273	113.754	15.344	104.534	15.038	105.269	-8.602	878.103	96.275
2019-01-16 09:45:00	11.213	113.791	14.579	112.82	15.038	103.093	15.956	106.994	-8.612	877.837	110.694
2019-01-16 10:00:00	12.896	105.807	15.497	106.923	16.109	100.224	17.027	102.724	-8.815	877.585	111.064
2019-01-16 10:15:00	12.59	107.554	14.885	111.418	16.874	101.516	17.945	100.704	-8.595	877.797	102.177
2019-01-16 10:30:00	12.59	112.259	14.732	105.152	16.415	98.984	16.568	102.608	-8.375	878.023	90.8982
2019-01-16 10:45:00	12.284	114.552	13.967	108.163	15.803	101.884	17.18	103.662	-8.168	878.369	84.337
2019-01-16 11:00:00	11.825	114.027	12.896	109.988	13.661	101.81	14.885	101.17	-7.917	878.821	87.1039
2019-01-16 11:15:00	10.601	111.838	13.202	112.511	13.355	103.426	13.355	104.921	-7.721	879.233	93.5691
2019-01-16 11:30:00	10.754	113.093	11.213	114.216	12.437	102.859	12.743	102.277	-7.579	879.619	94.8107
2019-01-16 11:45:00	8.918	116.024	9.53	115.538	9.989	106.688	10.448	106.757	-7.345	880.244	89.5011
2019-01-16 12:00:00	8	124.906	9.53	119.551	9.836	111.347	9.53	109.479	-7.057	880.736	97.664
2019-01-16 12:15:00	9.377	116.007	9.989	109.693	10.601	100.723	11.825	104.428	-6.796	880.723	104.941
2019-01-16 12:30:00	9.071	120.405	9.53	119.352	8.918	107.386	9.53	105.613	-6.766	880.616	109.633
2019-01-16 12:45:00	8.612	123.841	10.295	117.818	10.295	107.255	11.06	109.506	-6.545	881.042	103.009
2019-01-16 13:00:00	7.082	129.911	8	123.327	8.765	109.657	8.459	114.625	-6.186	881.095	91.9936
2019-01-16 13:15:00	7.082	119.189	7.235	118.871	7.541	110.586	7.388	114.342	-5.753	881.082	95.6014
2019-01-16 13:30:00	7.541	111.801	7.847	109.619	8.306	100.058	8.612	102.45	-5.631	880.975	96.1279
2019-01-16 13:45:00	6.47	113.756	7.082	111.95	7.082	108.397	7.541	109.825	-5.319	881.135	90.181
2019-01-16 14:00:00	6.47	131.605	5.858	118.328	5.858	102.461	4.94	111.969	-5.038	881.082	85.8442
2019-01-16 14:15:00	6.929	121.722	7.235	112.976	6.47	102.145	5.552	102.527	-4.638	881.149	84.984
2019-01-16 14:30:00	7.082	115.863	6.776	112.527	6.47	102.854	5.705	103.531	-4.594	880.936	61.994
2019-01-16 14:45:00	7.082	124.681	7.541	120.458	6.47	103.646	4.94	105.648	-4.422	881.228	55.7575
2019-01-16 15:00:00	5.246	124.58	5.705	116.968	5.399	106.188	5.093	112.471	-4.225	881.175	47.3421
2019-01-16 15:15:00	4.634	117.846	4.94	111.61	5.093	98.463	4.787	105.048	-4.198	881.242	50.3601
2019-01-16 15:30:00	4.481	121.674	3.869	123.713	3.41	109.942	3.257	104.836	-4.009	881.082	36.4001
2019-01-16 15:45:00	5.093	120.701	4.94	122.004	3.869	111.893	3.104	112.799	-3.727	881.135	25.341
2019-01-16 16:00:00	3.869	113.133	3.104	104.605	3.104	96.961	3.869	88.875	-3.659	881.335	28.1796
2019-01-16 16:15:00	4.94	99.204	5.399	93.167	5.246	89.175	4.787	89.385	-3.419	881.175	22.8931
2019-01-16 16:30:00	4.328	109.986	4.328	101.278	4.328	94.834	4.022	95.529	-3.602	881.388	16.759
2019-01-16 16:45:00	4.328	107.314	4.481	99.552	4.634	91.28	4.481	92.943	-3.334	881.415	10.655
2019-01-16 17:00:00	3.869	114.077	2.798	110.765	2.951	99.207	2.186	92.221	-3.399	881.588	4.631
2019-01-16 17:15:00	3.257	110.502	3.563	110.092	3.41	99.153	2.645	97.848	-3.561	881.455	0.296533
2019-01-16 17:30:00	2.492	111.193	2.951	95.821	2.798	95.889	2.339	94.945	-3.561	881.694	0
2019-01-16 17:45:00	1.88	117.349	1.198	108.9	1.88	92.512	1.045	104.665	-3.598	881.628	0
2019-01-16 18:00:00	0.376	152.23	0	118.248	0	96.34	0	116.859	-3.588	881.561	0
2019-01-16 18:15:00	0	51.816	0	118.192	0	96.303	0	116.763	-3.737	881.747	0
2019-01-16 18:30:00	3.257	126.81	3.104	133.817	3.257	142.658	2.811	201.308	-4.218	881.628	3.344
2019-01-16 18:45:00	5.399	287.798	6.011	284.031	6.623	273.091	6.776	272.975	-8.033	881.521	14.0519
2019-01-16 19:00:00	4.022	285.595	4.481	274.381	4.481	257.484	4.94	262.042	-8.667	881.148	10.5602
2019-01-16 19:15:00	3.41	309.971	3.869	294.212	3.716	280.19	3.563	282.038	-8.842	880.882	9.0392
2019-01-16 19:30:00	3.104	327.893	3.41	311.861	3.563	295.282	3.104	294.697	-9.354	880.935	7.22587
2019-01-16 19:45:00	3.716	327.575	4.175	315.017	3.716	302.517	4.022	300.746	-9.703	880.909	5.52013
2019-01-16 20:00:00	2.645	303.687	3.257	295.552	3.716	282.947	3.869	283.166	-9.926	880.856	3.90707
2019-01-16 20:15:00	2.645	302.883	2.798	294.424	3.257	283.112	3.41	275.932	-9.997	881.015	4.64093
2019-01-16 20:30:00	2.186	303.266	2.645	297.275	3.257	286.388	3.257	282.329	-10.157	881.308	2.59313
2019-01-16 20:45:00	0.223	302.391	1.045	311.79	1.421	284.524	1.045	300.744	-10.306	881.029	2.10307
2019-01-16 21:00:00	0	302.42	1.115	311.835	0.669	284.514	0	300.838	-10.671	881.015	0.578067
2019-01-16 21:15:00	0	297.012	0	311.638	0.223	284.425	0	288.327	-10.851	880.976	0.0496
2019-01-16 21:30:00	0.892	231.413	0.446	291.185	0	284.37	0	266.213	-10.343	881.122	0.426267
2019-01-16 21:45:00	0	231.347	0	291.197	0	284.371	0	266.382	-10.279	881.029	0.122733
2019-01-16 22:00:00	0	231.359	0	291.199	0	284.384	0	270.863	-10.153	881.108	0
2019-01-16 22:15:00	1.268	220.837	1.045	262.626	0.599	274.813	0.599	285.894	-9.838	880.976	0
2019-01-16 22:30:00	0	78.886	0	272.348	0.669	256.015	1.421	265.511	-11.535	881.002	0.145933
2019-01-16 22:45:00	0	78.877	0.892	295.571	0.223	259.974	0	295.725	-12.094	881.015	0.997267
2019-01-16 23:00:00	0	310.435	0.446	338.382	1.574	310.87	0.223	294.473	-12.013	880.856	1.38593
2019-01-16 23:15:00	0.223	282.021	0.822	318.263	1.727	311.794	1.421	323.357	-11.718	880.936	0.388333
2019-01-16 23:30:00	2.186	231.569	0.446	296.321	1.268	295.566	1.88	303.406	-11.437	880.763	0.2202
2019-01-16 23:45:00	0.223	189.518	0	316.447	0	295.473	0	348.364	-10.973	880.935	0.135267
2019-01-17 00:00:00	0.223	99.096	0.223	67.061	0.223	8.084	0	80.948	-10.834	881.149	0.012867
2019-01-17 00:15:00	0.892	165.312	0.669	0.052	0	294.214	0	257.901	-10.767	881.308	1.29267
2019-01-17 00:30:00	3.104	272.465	3.41	279.063	3.869	272.464	4.328	277.515	-10.113	881.069	11.7869
2019-01-17 00:45:00	5.093	273.509	6.317	276.946	6.929	271.19	7.235	271.683	-9.35	881.281	25.6562
2019-01-17 01:00:00	6.164	280.528	7.082	282.599	7.847	274.896	8.153	281.838	-8.832	881.614	26.3418
2019-01-17 01:15:00	5.705	283.458	6.929	281.366	7.388	275.248	8.153	284.356	-8.341	881.614	26.2421
2019-01-17 01:30:00	5.093	294.862	5.705	294.147	6.623	289.057	7.541	292.193	-8.277	882	24.0499
2019-01-17 01:45:00	4.328	312.519	4.634	301.005	4.787	289.833	5.399	290.517	-8.209	882.119	29.6073
2019-01-17 02:00:00	4.94	314.765	5.552	304.979	5.858	296.683	6.164	291.002	-8.026	882.213	36.1153
2019-01-17 02:15:00	5.093	322.015	5.552	309.251	5.246	294.85	5.399	292.073	-7.982	882.186	30.5427
2019-01-17 02:30:00	6.011	319.633	6.011	308.827	6.164	295.396	6.776	292.459	-7.972	882.213	25.0283
2019-01-17 02:45:00	6.47	329.544	6.776	313.545	6.929	297.673	7.541	294.776	-8.134	882.346	23.8219
2019-01-17 03:00:00	5.246	322.802	6.011	308.658	6.164	295.105	6.776	291.337	-8.338	882.213	26.7443
2019-01-17 03:15:00	4.94	308.079	5.552	298.298	6.011	286.386	6.47	284.591	-8.449	882.093	22.4616
2019-01-17 03:30:00	3.563	281.914	4.175	278.867	5.246	273.307	5.246	278.238	-8.253	881.907	17.1174
2019-01-17 03:45:00	2.951	275.596	3.716	274.941	3.869	269.652	4.022	273.949	-7.84	882	18.8367
2019-01-17 04:00:00	2.951	293.845	3.869	290.072	4.787	280.37	5.552	280.864	-7.684	881.88	21.5036
2019-01-17 04:15:00	6.317	316.173	8.918	305.299	9.377	292.88	10.448	291.367	-6.847	881.694	22.136
2019-01-17 04:30:00	6.776	298.336	9.53	292.197	10.754	280.765	11.672	282.731	-6.322	882.093	22.0782
2019-01-17 04:45:00	7.847	288.411	11.06	286.211	12.131	279.669	13.508	283.494	-5.722	882	22.0605
2019-01-17 05:00:00	9.377	289.768	11.825	289.705	13.355	280.629	13.967	276.689	-5.99	881.96	22.6764
2019-01-17 05:15:00	9.683	294.719	12.131	291.441	13.355	282.625	13.967	273.688	-5.685	881.894	35.9821
2019-01-17 05:30:00	7.694	282.956	8.459	281.432	10.142	274.575	10.448	264.85	-4.605	881.694	52.2811
2019-01-17 05:45:00	9.071	277.89	11.213	275.721	11.825	268.762	12.896	259.643	-2.613	881.84	43.9739
2019-01-17 06:00:00	7.847	286.605	9.53	283.272	10.754	274.504	10.907	246.486	-1.701	882.066	30.8176
2019-01-17 06:15:00	8.765	287.201	10.295	279.794	11.213	272.573	11.213	269.222	-0.898	882.239	12.1103
2019-01-17 06:30:00	7.388	297.103	8	282.309	8.918	269.065	9.989	270.022	-2.826	882.452	5.64433
2019-01-17 06:45:00	6.929	283.589	8.153	278.526	9.071	268.458	9.836	270.686	-3.297	882.492	4.01173
2019-01-17 07:00:00	7.235	284.055	8.459	283.932	9.224	269.128	9.836	272.844	-3.307	882.386	3.01347
2019-01-17 07:15:00	6.011	285.296	8.459	274.73	9.53	266.875	10.601	270.798	-1.83	882.452	4.15247
2019-01-17 07:30:00	8	280.817	9.683	281.354	10.601	269.153	11.06	276.316	-0.888	882.904	7.39207
2019-01-17 07:45:00	7.235	287.928	8.306	285.211	9.377	266.878	9.989	267.06	-1.85	882.944	8.39733
2019-01-17 08:00:00	8.918	289.4	9.989	276.467	9.989	262.283	11.825	264.364	-1.071	883.157	20.2918
2019-01-17 08:15:00	9.989	276.427	11.06	273.031	11.978	263.902	12.131	264.176	-0.959	883.104	39.2892
2019-01-17 08:30:00	10.754	272.72	10.907	267.772	12.131	258.326	12.284	248.984	-0.523	883.29	45.9175
2019-01-17 08:45:00	9.224	270.823	10.142	278.384	11.366	271.507	12.284	264.87	-0.59	883.623	57.7051
2019-01-17 09:00:00	9.836	275.106	10.907	268.21	12.284	261.705	12.437	253.764	-0.715	883.623	73.8126
2019-01-17 09:15:00	9.836	271.352	11.825	271.093	12.743	260.23	13.661	256.032	-0.59	884.062	95.1892
2019-01-17 09:30:00	10.601	271.188	12.896	265.489	13.049	256.895	13.355	252.19	-0.689	884.207	108.2
2019-01-17 09:45:00	11.213	273.116	12.743	270.651	12.59	263.044	13.508	257.72	-0.699	884.327	111.022
2019-01-17 10:00:00	9.377	276.96	11.519	271.72	11.978	264.147	12.131	257.62	-0.729	884.713	107.334
2019-01-17 10:15:00	9.224	274.264	11.06	275.774	11.825	265.285	11.672	267.941	-0.729	884.846	117.15
2019-01-17 10:30:00	8.765	288.572	10.295	283.459	11.06	276.158	11.672	280.488	-0.777	884.952	120.689
2019-01-17 10:45:00	9.071	294.242	9.836	294.615	10.601	288.475	11.519	290.106	-1.485	885.032	128.581
2019-01-17 11:00:00	8.765	299.632	9.377	293.362	9.683	284.418	10.295	287.082	-1.65	885.245	103.632
2019-01-17 11:15:00	7.235	297.363	7.847	290.601	8.612	281.902	8.918	255.378	-1.41	885.525	77.5487
2019-01-17 11:30:00	8	283.903	7.847	282.187	8.918	272.616	8.918	259.29	-1.268	885.697	69.5071
2019-01-17 11:45:00	5.705	296.3	6.47	289.375	7.082	277.902	7.541	270.727	-1.034	885.883	62.1329
2019-01-17 12:00:00	6.623	293.706	7.694	288.933	8.153	279.61	8.306	254.329	-0.593	886.163	49.9609
2019-01-17 12:15:00	7.847	295.642	8	290.007	8.153	279.302	9.377	260.453	-0.546	886.322	60.8339
2019-01-17 12:30:00	8.459	293.329	9.224	292.225	9.683	282.767	9.377	266.792	-0.201	886.375	58.2033
2019-01-17 12:45:00	8.153	298.527	8.459	287.439	8.153	278.095	8.612	244.938	0.26	886.442	40.6952
2019-01-17 13:00:00	7.388	303.299	7.694	296.582	7.694	282.445	8.153	279.282	0.775	886.934	23.9985
2019-01-17 13:15:00	8.765	306.899	9.683	296.531	9.224	285.18	9.377	285.63	0.555	887.041	22.1878
2019-01-17 13:30:00	8.306	304.686	8.459	301.492	9.224	289.314	9.377	288.509	0.395	886.828	23.937
2019-01-17 13:45:00	8.459	315.664	9.071	308.492	9.071	296.582	8.918	296.937	0.66	886.854	23.9667
2019-01-17 14:00:00	8.459	307.847	8.153	304.22	8.306	295.936	8.918	293.632	0.409	886.694	26.5861
2019-01-17 14:15:00	8.153	317.934	9.53	309.019	9.071	297.02	9.53	297.234	0.148	886.375	26.0982
2019-01-17 14:30:00	8.459	309.781	8.918	299.346	8.765	287.378	9.071	289.143	0.297	886.162	35.4233
2019-01-17 14:45:00	9.224	301.547	9.377	299.531	9.377	291.836	9.683	293.195	0.453	885.857	40.0824
2019-01-17 15:00:00	9.224	306.829	9.836	305.061	10.448	296.916	10.295	293.562	0.335	885.737	45.5605
2019-01-17 15:15:00	9.071	308.745	9.836	302.945	9.683	294.801	10.295	294.793	0.335	885.578	61.337
2019-01-17 15:30:00	9.836	300.249	10.448	293.218	10.295	287.088	10.448	287.479	0.074	885.378	72.5468
2019-01-17 15:45:00	9.071	303.332	9.836	292.086	10.142	284.736	10.448	286.752	0.047	884.979	74.5991
2019-01-17 16:00:00	8.765	299.437	9.53	298.209	9.377	290.326	9.53	288.604	0.423	885.085	66.1083
2019-01-17 16:15:00	8.918	293.934	9.53	287.661	9.53	275.499	9.836	279.056	-0.018	884.952	37.2979
2019-01-17 16:30:00	9.377	296.634	9.836	287.556	10.295	281.858	10.601	280.99	0.148	885.019	32.9209
2019-01-17 16:45:00	10.448	292.754	11.213	287.529	11.825	280.264	12.131	283.177	-0.011	885.019	52.9365
2019-01-17 17:00:00	8.459	296.313	9.224	292.17	9.377	280.105	9.224	282.318	-0.177	885.285	62.9441
2019-01-17 17:15:00	7.235	301.852	8.459	294.192	8.918	282.492	9.071	280.872	-0.14	885.245	63.7154
2019-01-17 17:30:00	8.765	291.252	9.53	296.205	9.53	288.035	9.224	288.023	-0.339	885.325	53.2685
2019-01-17 17:45:00	7.082	300.995	8.153	298.668	8.306	288.714	8.765	289.848	-0.516	885.498	44.733
2019-01-17 18:00:00	7.541	307.576	7.847	303.35	8.612	292.584	8.153	293.587	-0.688	885.591	41.5117
2019-01-17 18:15:00	6.623	315.378	7.694	307.639	7.694	296.773	8.765	238.606	-1.081	885.511	37.4971
2019-01-17 18:30:00	6.776	326.325	7.694	317.741	8	305.707	8.612	304.794	-1.508	885.604	32.867
2019-01-17 18:45:00	5.246	318.637	6.164	317.677	6.317	311.015	6.776	243.2	-1.667	885.697	27.1641
2019-01-17 19:00:00	4.94	326.3	6.623	320.092	7.082	304.851	6.929	270.325	-1.776	886.003	21.4781
2019-01-17 19:15:00	4.481	321.992	4.328	316.874	5.399	310.528	5.093	283.482	-1.894	885.884	17.2843
2019-01-17 19:30:00	4.328	319.302	4.634	314.237	5.399	302.28	6.011	275.516	-1.931	885.963	15.9035
2019-01-17 19:45:00	4.787	308.585	5.858	304.794	6.011	295.033	6.011	270.901	-1.989	886.136	12.6827
2019-01-17 20:00:00	4.634	304.065	5.093	295.158	5.399	284.433	5.858	262.739	-2.023	886.203	7.9434
2019-01-17 20:15:00	4.94	294.833	5.399	286.301	5.399	276.029	5.858	258.296	-2.013	886.149	3.2002
2019-01-17 20:30:00	2.798	296.875	3.41	288.388	3.869	279.737	4.022	262.133	-2.281	886.043	0.399
2019-01-17 20:45:00	2.033	287.138	2.492	286.642	2.339	280.93	2.492	262.114	-2.416	886.163	0.067933
2019-01-17 21:00:00	0.892	253.821	1.045	259.5	1.268	254.459	1.198	239.656	-2.47	886.242	0
2019-01-17 21:15:00	1.115	223.895	1.115	238.703	0.822	241.362	1.045	229.329	-2.24	886.415	0
2019-01-17 21:30:00	0	202.89	0	239.159	0	255.207	0	224.479	-2.209	886.388	0
2019-01-17 21:45:00	1.268	89.158	1.045	158.326	0	244.741	0	193.388	-3.483	886.256	0
2019-01-17 22:00:00	0.376	95.577	0.223	138.321	0	244.867	0	223.827	-3.642	886.043	0.029133
2019-01-17 22:15:00	2.186	163.803	0.822	141.913	0.669	141.216	0.223	126.304	-3.121	885.764	0.041
2019-01-17 22:30:00	1.351	90.649	1.268	82.204	1.574	77.622	1.727	75.698	-3.212	885.857	0.199867
2019-01-17 22:45:00	0.446	71.522	2.186	78.815	2.951	72.267	2.339	58.622	-4.73	885.644	0.125067
2019-01-17 23:00:00	0	60.37	1.574	74.048	2.033	68.29	2.339	12.309	-5.448	885.591	1.2994
2019-01-17 23:15:00	0	60.372	0	75.889	1.574	68.275	2.033	58.522	-5.502	885.458	1.9338
2019-01-17 23:30:00	0	60.372	0	75.907	0.446	70.222	2.033	42.275	-5.715	885.498	0.384
2019-01-17 23:45:00	0	60.367	0	97.935	1.198	81.767	2.798	50.112	-5.923	885.365	0.849933
2019-01-18 00:00:00	0	60.383	0	113.141	0.669	93.599	1.88	65.38	-5.841	885.125	2.53813
2019-01-18 00:15:00	0.223	74.676	1.727	104.176	1.88	100.601	2.186	70.271	-5.594	884.819	6.6282
2019-01-18 00:30:00	0.223	36.489	1.574	104.146	1.88	93.919	2.186	63.883	-5.834	884.673	9.60133
2019-01-18 00:45:00	0	71.83	2.033	97.201	1.421	93.348	2.186	65.926	-6.281	884.566	8.11807
2019-01-18 01:00:00	0	75.746	0	86.732	1.727	95.278	2.798	71.644	-6.749	884.274	8.58287
2019-01-18 01:15:00	0	75.741	0	105.253	0.223	111.568	2.033	87.745	-7.121	884.154	12.4147
2019-01-18 01:30:00	0.892	294.902	0	119.415	0.599	119.742	2.186	99.705	-6.857	883.729	15.8611
2019-01-18 01:45:00	0	299.921	0.223	99.009	1.281	97.633	2.492	84.591	-7.66	883.636	19.5373
2019-01-18 02:00:00	0.599	286.737	0.223	103.652	1.128	94.881	1.88	88.798	-7.575	883.383	19.6111
2019-01-18 02:15:00	0.223	292.363	0	95.063	0.223	82.443	2.492	76.449	-8.273	883.316	23.1613
2019-01-18 02:30:00	0.822	220.247	0.975	110.932	3.716	91.913	5.552	73.925	-8.188	883.024	23.2811
2019-01-18 02:45:00	0	140.235	2.033	104.359	4.175	92.312	4.022	77.036	-8.067	882.917	18.8945
2019-01-18 03:00:00	0.223	120.853	2.339	111.385	4.175	102.239	4.175	88.465	-7.714	882.891	20.4609
2019-01-18 03:15:00	4.481	133.404	5.399	119.514	4.022	110.931	2.492	101.592	-6.278	882.957	31.1701
2019-01-18 03:30:00	4.634	145.928	5.399	137.523	5.246	134.025	5.399	109.846	-5.482	883.024	39.5763
2019-01-18 03:45:00	4.481	143.33	5.093	132.673	5.093	125.72	4.328	103.924	-5.522	883.103	46.6813
2019-01-18 04:00:00	3.869	138.799	5.093	121.901	3.563	111.873	2.339	102.245	-5.543	883.223	49.3375
2019-01-18 04:15:00	4.328	131.871	5.093	125.106	4.022	114.132	3.563	93.087	-6.061	883.397	34.7058
2019-01-18 04:30:00	3.104	141.072	4.175	124.233	4.175	114.67	3.104	86.183	-6.528	883.316	24.0546
2019-01-18 04:45:00	0.223	47.466	2.492	116.215	3.563	106.291	3.869	92.844	-7.68	883.223	17.0721
2019-01-18 05:00:00	0.446	328.428	0.669	86.703	0	108.281	1.198	83.475	-10.421	883.21	15.2731
2019-01-18 05:15:00	1.268	240.631	1.574	140	2.033	122.543	2.186	94.495	-9.913	882.585	14.4011
2019-01-18 05:30:00	1.128	225.476	0.822	120.325	1.88	114.756	2.033	82.39	-9.134	882.399	11.5029
2019-01-18 05:45:00	1.421	293.041	1.268	181.595	0.376	100.528	0.446	91.424	-9.418	882.266	9.21213
2019-01-18 06:00:00	2.951	270.803	3.104	256.317	2.339	205.493	0.822	117.809	-9.354	882.306	7.66
2019-01-18 06:15:00	2.033	246.001	0.599	221.572	0.223	220.135	0.892	132.202	-8.578	882.027	7.74007
2019-01-18 06:30:00	0	177.38	1.88	138.973	2.492	122.671	2.492	99.871	-8.744	882.093	4.63333
2019-01-18 06:45:00	0.822	60.738	0.599	62.373	0	72.066	0.223	62.603	-8.883	881.894	5.07213
2019-01-18 07:00:00	0.223	344.743	0	62.379	0	72.098	0	47.586	-12.558	881.867	6.19273
2019-01-18 07:15:00	0	307.373	0.446	19.629	0	72.095	0	40.801	-12.657	881.535	4.7816
2019-01-18 07:30:00	0	307.29	0	325.918	0	72.128	0	99.094	-12.179	881.321	5.589
2019-01-18 07:45:00	0	307.224	0	263.655	0.446	103.558	1.198	91.367	-11.213	881.335	5.29127
2019-01-18 08:00:00	0.223	122.568	2.033	140.126	2.339	119.671	2.339	94.936	-10.939	881.308	8.062
2019-01-18 08:15:00	4.481	161.019	4.328	139.246	4.022	128.059	4.022	106.618	-8.798	881.321	14.5342
2019-01-18 08:30:00	4.481	151.965	5.246	134.88	4.328	118.373	3.104	94.573	-8.195	881.601	22.8275
2019-01-18 08:45:00	1.351	67.228	2.339	139.514	4.328	123.335	3.716	101.09	-11.942	882.08	32.2245
2019-01-18 09:00:00	0	357.566	0.599	107.14	2.186	112.962	2.339	96.028	-15.702	881.694	33.4181
2019-01-18 09:15:00	0.892	272.525	0.223	91.795	0.669	116.961	0.669	87.464	-14.33	881.601	21.826
2019-01-18 09:30:00	1.115	272.473	0	133.947	0.223	134.896	2.422	108.983	-13.192	881.361	15.4202
2019-01-18 09:45:00	0.975	195.407	3.41	143.259	4.175	126.638	3.563	101.821	-11.932	881.561	13.3536
2019-01-18 10:00:00	3.41	149.501	4.022	137.02	4.328	129.728	3.257	94.285	-9.225	881.734	12.7119
2019-01-18 10:15:00	3.563	148.027	4.022	124.251	4.022	121.704	2.492	94.738	-8.697	882.319	10.2141
2019-01-18 10:30:00	0.822	69.598	1.657	138.033	3.41	126.248	3.563	108.093	-9.987	882.625	10.8504
2019-01-18 10:45:00	0	35.731	2.186	118.723	3.257	106.952	2.339	95.579	-10.319	883.024	14.7453
2019-01-18 11:00:00	0.223	28.101	1.727	110.378	2.339	104.723	2.033	92.032	-10.864	883.343	18.8463
2019-01-18 11:15:00	0	2.752	0	104.638	0.822	94.212	2.186	85.667	-10.38	883.716	19.2222
2019-01-18 11:30:00	1.115	283.001	0.669	132.4	0.223	99.301	0.223	96.522	-10.285	884.314	19.195
2019-01-18 11:45:00	0.223	273.79	0	161.68	1.351	136.912	1.88	114.232	-8.514	884.34	24.6183
2019-01-18 12:00:00	1.504	135.201	1.351	128.926	2.033	121.803	1.504	91.575	-6.661	884.646	29.5526
2019-01-18 12:15:00	0.822	81.507	0.599	103.173	0.822	113.54	1.128	76.311	-5.814	885.072	38.1279
2019-01-18 12:30:00	2.339	73.711	2.951	93.307	3.799	83.677	4.022	67.685	-5.201	885.591	49.5775
2019-01-18 12:45:00	4.175	121.99	4.481	110.861	4.022	100.345	4.022	75.107	-4.249	885.232	58.7889
2019-01-18 13:00:00	4.328	124.661	3.41	124.095	3.716	111.839	3.869	88.654	-3.839	885.059	69.6938
2019-01-18 13:15:00	4.022	126.367	4.175	118.579	3.716	102.513	3.41	76.356	-3.453	884.846	75.9002
2019-01-18 13:30:00	4.787	123.735	4.481	114.695	4.481	97.3	4.481	68.837	-3.1	884.526	83.8324
2019-01-18 13:45:00	6.011	126.566	6.011	125.495	5.399	127.227	4.175	61.602	-3.002	884.274	88.2141
2019-01-18 14:00:00	4.481	126.03	4.481	121.276	3.869	109.587	4.175	70.131	-2.884	883.889	95.6615
2019-01-18 14:15:00	5.705	120.32	5.399	117.183	5.858	109.386	5.552	61.194	-2.325	883.942	100.13
2019-01-18 14:30:00	5.858	121.159	5.552	121.185	4.94	105.55	5.552	58.607	-2.44	883.543	103.289
2019-01-18 14:45:00	7.388	109.608	7.388	105.926	6.929	96.937	6.164	57.723	-2.277	883.29	103.92
2019-01-18 15:00:00	7.388	113.801	7.847	105.652	7.082	90.585	6.623	51.769	-2.294	883.143	99.633
2019-01-18 15:15:00	7.388	114.692	7.541	106.212	6.929	95.25	6.011	57.767	-2.223	882.997	98.4533
2019-01-18 15:30:00	7.694	106.682	7.235	103.068	8.153	97.377	7.235	48.561	-1.979	882.824	107.205
2019-01-18 15:45:00	6.47	115.624	7.235	104.575	7.388	105.764	6.776	55.245	-1.739	882.797	99.7969
2019-01-18 16:00:00	6.929	106.624	7.082	103.265	6.317	95.761	6.317	41.326	-1.959	882.758	101.129
2019-01-18 16:15:00	6.776	121.392	7.235	110.377	6.317	95.689	5.399	42.528	-2.152	882.891	95.6458
2019-01-18 16:30:00	7.541	111.868	7.082	104.243	6.929	95.874	6.317	53.342	-2.209	882.651	79.4139
2019-01-18 16:45:00	4.328	127.293	4.022	119.204	3.563	99.014	3.869	61.661	-2.192	882.864	63.2639
2019-01-18 17:00:00	4.328	111.714	5.399	103.405	5.399	98.847	4.94	55.015	-1.962	883.184	60.1847
2019-01-18 17:15:00	3.716	129.06	4.022	118.569	3.41	113.099	2.645	62.472	-1.783	883.357	51.0509
2019-01-18 17:30:00	6.317	275.898	4.787	254.544	4.328	262.47	2.422	103.813	-5.333	883.277	40.7389
2019-01-18 17:45:00	4.328	309.205	4.175	301.86	4.328	289.221	4.175	156.269	-6.925	883.024	36.5249
2019-01-18 18:00:00	3.563	294.052	3.563	289.564	3.716	280.524	3.563	157.399	-7.548	882.744	32.8418
2019-01-18 18:15:00	3.104	340.834	3.41	319.74	3.563	305.164	2.951	172.436	-8.033	882.399	30.4261
2019-01-18 18:30:00	2.798	320.939	2.492	311.995	2.645	294.757	2.186	122.243	-8.212	882.04	27.7519
2019-01-18 18:45:00	3.257	276.358	3.563	327.214	4.175	311.567	3.563	171.874	-9.317	881.8	23.0567
2019-01-18 19:00:00	3.716	333.663	3.869	317.081	3.716	291.835	3.41	133.323	-10.024	881.694	18.9792
2019-01-18 19:15:00	3.563	332.196	3.716	312.34	3.869	290.813	2.951	254.139	-10.349	881.521	13.0485
2019-01-18 19:30:00	2.951	342.234	2.951	321.853	2.951	307.297	2.339	264.437	-10.716	881.454	5.513
2019-01-18 19:45:00	2.339	335.12	2.951	322.849	2.798	304.821	2.798	196.736	-10.949	881.441	1.02187
2019-01-18 20:00:00	2.033	330.514	2.645	313.002	2.492	294.709	2.186	275.36	-10.976	881.455	1.19093
2019-01-18 20:15:00	2.186	324.131	2.339	308.539	2.645	296.05	2.339	274.444	-11.132	881.628	0.647533
2019-01-18 20:30:00	1.268	312.013	1.574	307.283	1.421	298.938	1.727	273.362	-11.01	881.761	0.059
2019-01-18 20:45:00	2.033	311.632	2.798	302.029	2.186	292.01	2.186	253.188	-11.278	881.814	0.1128
2019-01-18 21:00:00	1.421	303.338	1.421	298.193	1.727	290.69	2.033	242.277	-11.258	881.987	0
2019-01-18 21:15:00	2.186	305.824	2.798	299.34	2.645	289.197	2.798	231.852	-11.373	882.372	0.3538
2019-01-18 21:30:00	3.716	291.545	3.716	287.064	4.022	276.781	3.41	207.327	-11.376	882.518	0.931133
2019-01-18 21:45:00	3.104	291.836	2.951	283.24	3.104	268.52	3.41	207.714	-11.271	882.638	0.8686
2019-01-18 22:00:00	3.257	274.997	3.257	272.442	3.41	265.347	3.257	210.003	-11.386	882.758	0.5916
2019-01-18 22:15:00	2.951	272.497	3.257	271.413	3.41	263.964	3.41	206.122	-11.501	882.665	0.8534
2019-01-18 22:30:00	2.186	280.703	2.492	270.644	2.645	258.537	2.798	186.569	-11.549	882.558	0.9012
2019-01-18 22:45:00	1.574	306.702	1.421	284.641	1.115	265.857	1.115	200.093	-11.515	882.864	0.437067
2019-01-18 23:00:00	0.599	334.054	0.669	324.583	0.892	303.782	0.975	206.805	-11.549	882.691	0
2019-01-18 23:15:00	0	334.717	0.223	325.277	0.223	302.58	0	197.868	-11.634	882.784	0
2019-01-18 23:30:00	0.446	334.78	0.892	325.4	0	302.619	0	162.976	-11.661	882.598	0
2019-01-18 23:45:00	0	334.821	0	325.375	0	302.581	0	278.023	-11.704	882.891	0
2019-01-19 00:00:00	0	334.821	0	325.37	0	302.588	0	277.571	-11.648	882.784	0
2019-01-19 00:15:00	0	334.816	0	325.351	0	302.593	0	278.576	-11.583	882.838	0
2019-01-19 00:30:00	0	334.837	0	325.505	0	302.789	0	58.921	-11.518	882.811	0.365667
2019-01-19 00:45:00	0.223	335.191	0.892	325.758	0.822	348.099	0.446	78.702	-11.467	882.864	0.524933
2019-01-19 01:00:00	1.115	330.569	1.574	343.265	1.88	335.51	1.88	326.038	-11.515	883.077	0.012867
2019-01-19 01:15:00	1.574	301.045	1.727	307.463	1.88	299.672	1.88	293.327	-11.349	883.396	1.4716
2019-01-19 01:30:00	2.186	269.944	2.033	267.208	2.186	260.962	1.88	246.726	-11.122	883.676	2.48313
2019-01-19 01:45:00	2.951	262.989	2.951	260.922	2.951	251.687	2.951	239.729	-11.024	883.676	1.29413
2019-01-19 02:00:00	3.716	261.396	3.869	262.248	4.175	250.299	4.175	237.044	-10.854	883.596	1.5354
2019-01-19 02:15:00	3.257	258.406	3.563	251.086	3.716	241.66	3.716	235.003	-10.6	883.556	1.89
2019-01-19 02:30:00	3.563	296.581	4.328	289.412	4.022	278.646	4.022	270.893	-10.702	883.716	3.1496
2019-01-19 02:45:00	3.104	305.829	3.104	293.473	3.104	280.448	3.104	270.337	-10.895	883.676	2.92427
2019-01-19 03:00:00	2.492	322.068	3.104	312.788	2.951	301.019	2.798	288.096	-11.078	883.756	5.13127
2019-01-19 03:15:00	2.339	324.414	2.492	317.795	2.798	303.176	2.645	293.374	-11.156	883.902	6.7802
2019-01-19 03:30:00	3.104	306.914	3.104	298.754	3.104	288.824	3.257	282.587	-11.159	884.101	5.23227
2019-01-19 03:45:00	2.492	301.213	2.645	294.344	2.492	281.219	2.492	272.38	-11.169	884.075	2.09427
2019-01-19 04:00:00	2.492	306.865	2.798	295.332	2.645	283.956	2.798	279.599	-11.183	884.194	0.645867
2019-01-19 04:15:00	3.257	314.082	3.104	308.206	2.645	295.892	2.798	286.47	-11.162	884.247	0.355933
2019-01-19 04:30:00	2.798	301.623	3.104	294.538	2.645	288.3	2.645	281.31	-11.251	884.487	0.151
2019-01-19 04:45:00	2.492	301.89	2.645	294.984	2.492	284.317	2.492	280.634	-11.356	884.486	0.017933
2019-01-19 05:00:00	3.41	286.787	3.104	283.336	3.104	274.539	2.645	273.031	-11.549	884.526	0
2019-01-19 05:15:00	3.41	260.042	3.104	258.932	2.798	257.335	3.104	259.27	-11.83	884.553	0
2019-01-19 05:30:00	2.645	271.094	2.951	271.388	2.186	263.073	2.186	264.746	-11.834	884.194	0
2019-01-19 05:45:00	2.339	279.441	2.033	279.442	1.727	267.743	2.186	263.401	-11.871	884.301	0
2019-01-19 06:00:00	2.951	264.358	3.104	261.585	2.339	255.033	2.798	259.2	-12.043	884.513	0
2019-01-19 06:15:00	3.257	252.934	3.257	260.082	2.645	253.282	2.645	252.519	-12.179	884.526	0
2019-01-19 06:30:00	3.104	253.61	2.951	255.301	3.104	248.661	2.492	253.81	-12.064	884.473	0
2019-01-19 06:45:00	2.645	251.763	2.798	258.047	2.492	256.015	2.645	258.467	-12.091	884.513	0
2019-01-19 07:00:00	2.492	255.267	2.339	262.501	1.88	258.461	2.033	266.882	-12.091	884.673	0
2019-01-19 07:15:00	2.033	251.29	2.339	255.95	2.492	257.132	2.186	263.949	-12.19	884.527	0
2019-01-19 07:30:00	2.645	260.693	2.339	250.179	2.033	250.953	1.88	250.602	-12.159	884.832	0
2019-01-19 07:45:00	2.645	250.66	2.492	247.396	2.033	247.55	2.339	253.897	-12.246	884.832	0
2019-01-19 08:00:00	2.033	257.617	1.88	282.605	0.669	289.896	0.446	292.505	-12.291	885.072	0
2019-01-19 08:15:00	2.033	256.057	1.88	263.685	1.727	260.33	1.727	269.246	-12.193	885.298	0
2019-01-19 08:30:00	2.492	237.456	2.186	232.037	1.88	229.018	2.033	234.318	-12.427	885.511	0
2019-01-19 08:45:00	1.574	232.637	1.88	231.197	1.115	225.287	1.268	227.768	-12.545	885.644	0
2019-01-19 09:00:00	1.421	229.167	1.421	230.967	1.115	229.332	0.669	231.818	-12.541	886.083	0
2019-01-19 09:15:00	1.88	238.457	1.421	241.047	1.115	237.949	0.446	235.764	-12.437	886.349	0
2019-01-19 09:30:00	2.033	235.284	2.033	236.45	1.421	238.732	0.669	246.255	-12.541	886.482	0
2019-01-19 09:45:00	1.268	257.3	1.574	262.946	0.446	262.814	0.599	274.804	-12.467	886.734	0
2019-01-19 10:00:00	1.115	262.081	1.421	258.957	0.669	252.68	0.669	261.115	-12.457	887.014	0
2019-01-19 10:15:00	1.574	263.814	1.574	248.326	0.223	238.739	0.223	236.987	-12.694	887.134	0
2019-01-19 10:30:00	1.88	245.88	1.727	228.453	1.115	228.419	0	219.633	-13.006	887.174	0
2019-01-19 10:45:00	1.045	234.066	0.669	208.788	0	214.862	0	187.108	-12.711	887.559	0
2019-01-19 11:00:00	0	139.559	0	131.484	0.223	156.905	0	112.194	-12.42	887.706	0
2019-01-19 11:15:00	0.223	96.335	0	83.142	0.223	102.222	0	72.397	-12.176	888.104	0
2019-01-19 11:30:00	0.223	76.126	0.376	101.023	0.376	73.348	0.223	106.813	-12.077	888.41	0
2019-01-19 11:45:00	1.268	126.813	1.421	126.416	0.975	119.056	0.822	119.829	-12.193	888.81	0
2019-01-19 12:00:00	1.727	168.186	1.574	156.068	1.421	145.397	1.268	141.317	-12.196	888.942	0
2019-01-19 12:15:00	2.339	136.843	1.727	134.901	2.033	125.752	1.88	125.402	-12.064	889.116	0
2019-01-19 12:30:00	2.339	148.504	2.033	137.399	1.727	124.485	1.727	119.117	-12.081	889.395	0
2019-01-19 12:45:00	2.033	154.817	1.421	126.612	1.574	116.173	1.115	119.683	-11.925	889.701	0
2019-01-19 13:00:00	0.223	75.419	0.223	91.624	0.669	72.944	0.223	79.839	-11.356	889.74	0
2019-01-19 13:15:00	1.421	85.926	1.198	85.568	0.822	77.188	1.045	84.199	-10.949	889.926	0
2019-01-19 13:30:00	1.88	69.961	1.727	73.316	1.351	70.134	1.268	80.937	-11.017	890.259	0
2019-01-19 13:45:00	1.421	73.167	1.115	75.033	0.669	59.927	0.822	82.284	-10.516	890.246	0
2019-01-19 14:00:00	1.727	75.426	1.574	77.877	1.727	74.746	1.045	75.565	-10.397	890.352	0
2019-01-19 14:15:00	1.574	98.232	1.574	91.107	1.574	90.508	0.892	89.524	-9.831	890.379	0
2019-01-19 14:30:00	3.104	59.52	2.033	58.732	1.88	61.27	1.421	62.622	-9.615	890.432	0.017
2019-01-19 14:45:00	2.645	84.233	2.186	88.603	1.727	80.79	1.574	77.562	-9.089	890.272	0.432267
2019-01-19 15:00:00	3.41	78.327	3.104	70.097	2.339	71.382	2.186	67.987	-9.028	890.246	0.766733
2019-01-19 15:15:00	3.257	98.798	2.951	100.981	2.645	88.147	2.492	88.847	-8.276	890.259	2.15147
2019-01-19 15:30:00	3.41	91.422	3.563	88.721	3.104	88.181	3.104	91.524	-7.833	890.259	3.52793
2019-01-19 15:45:00	3.104	99.52	3.104	99.522	3.104	97.731	2.798	91.781	-7.02	890.365	1.7898
2019-01-19 16:00:00	2.951	110.954	2.645	110.793	2.645	101.744	2.492	116.084	-6.254	890.325	0.757667
2019-01-19 16:15:00	1.88	73.935	2.186	84.866	1.88	80.359	1.88	84.156	-5.319	890.738	0.1376
2019-01-19 16:30:00	3.563	63.291	3.41	66.089	3.257	68.132	3.257	4.922	-5.183	890.951	1.32793
2019-01-19 16:45:00	3.41	69.278	3.104	69.808	3.104	64.397	3.257	1.525	-4.913	891.137	1.7196
2019-01-19 17:00:00	1.88	67.161	2.186	67.86	2.186	65.402	2.339	2.301	-4.692	891.097	3.9522
2019-01-19 17:15:00	1.198	78.478	1.268	81.167	1.727	66.518	2.033	7.077	-4.198	891.629	4.3904
2019-01-19 17:30:00	0.975	69.983	0.822	90.231	0.975	74.37	0.669	6.395	-3.351	891.735	3.79847
2019-01-19 17:45:00	2.951	79.518	3.563	75.915	3.563	68.418	3.41	6.92	-3.676	891.961	7.8604
2019-01-19 18:00:00	2.645	98.918	2.186	111.106	2.186	99.963	1.727	33.435	-3.27	891.762	9.03493
2019-01-19 18:15:00	2.798	114.477	2.645	112.714	1.88	90.574	1.574	35.706	-2.684	891.815	7.60787
2019-01-19 18:30:00	2.339	126.342	2.645	119.689	2.492	109.336	2.492	93.906	-3.324	891.443	15.7207
2019-01-19 18:45:00	3.104	148.35	2.798	122.412	2.339	118.978	1.421	100.99	-3.649	891.004	18.8889
2019-01-19 19:00:00	3.869	156.279	4.328	129.711	3.716	101.75	1.88	86.428	-4.117	891.071	22.8481
2019-01-19 19:15:00	4.328	146.947	4.328	126.162	3.563	104.326	2.951	87.147	-4.167	890.711	30.8071
2019-01-19 19:30:00	4.787	148.672	4.481	131.082	3.104	97.341	2.492	82.361	-4.3	890.631	39.9502
2019-01-19 19:45:00	4.481	142.771	6.011	111.547	6.929	98.98	7.235	79.635	-4.212	890.538	36.5601
2019-01-19 20:00:00	3.869	105.186	5.552	108.589	7.388	99.791	8	78.005	-5.509	890.605	40.9945
2019-01-19 20:15:00	5.399	122.133	8	107.481	7.694	97.697	7.082	76.282	-4.916	890.631	38.7208
2019-01-19 20:30:00	4.94	122.946	7.082	109.346	7.082	99.382	7.235	80.899	-4.991	890.698	36.5423
2019-01-19 20:45:00	4.787	123.689	6.317	112.984	7.847	102.104	8.612	82.592	-5.279	890.831	39.3926
2019-01-19 21:00:00	6.623	126.083	7.541	116.885	7.541	108.832	7.694	88.754	-4.659	890.765	38.9852
2019-01-19 21:15:00	6.011	125.511	8.306	118.042	8.918	104.98	9.224	85.63	-4.845	890.764	34.8541
2019-01-19 21:30:00	6.929	119.902	9.377	112.98	10.601	103.161	11.213	83.626	-5.624	890.724	32.5767
2019-01-19 21:45:00	7.541	114.879	10.448	111.968	11.366	101.359	12.284	71.167	-6.075	890.711	33.6815
2019-01-19 22:00:00	8.612	112.26	11.213	107.648	12.59	97.434	13.508	70.212	-6.102	890.432	33.225
2019-01-19 22:15:00	7.694	112.363	10.295	107.032	12.437	96.68	13.661	61.79	-6.451	890.405	33.2912
2019-01-19 22:30:00	7.694	107.629	10.142	107.711	11.672	96.682	13.202	77.954	-7.003	890.379	32.2397
2019-01-19 22:45:00	8.459	111.929	11.06	105.557	12.284	96.042	13.967	79.077	-7.043	890.405	32.0972
2019-01-19 23:00:00	8.153	115.531	11.366	108.045	12.896	96.462	14.579	80.943	-7.111	890.352	32.5449
2019-01-19 23:15:00	9.683	110.63	12.437	106.903	13.661	98.139	15.803	83.316	-6.959	890.246	32.652
2019-01-19 23:30:00	9.836	111.356	12.743	106.443	14.273	97.978	15.956	85.573	-6.762	890.126	34.0165
2019-01-19 23:45:00	9.989	110.112	13.202	107.683	14.579	99.118	16.262	85.598	-6.739	890.153	33.9587
2019-01-20 00:00:00	9.989	110.405	12.437	108.157	14.12	100.377	15.191	89.146	-6.62	890.339	32.1898
2019-01-20 00:15:00	9.53	111.298	12.131	106.634	14.426	99.769	15.497	89.537	-6.332	890.365	52.9316
2019-01-20 00:30:00	9.989	107.174	11.825	106.979	13.508	99.416	15.803	86.301	-6.207	890.458	60.5483
2019-01-20 00:45:00	11.519	110.84	14.273	107.869	15.497	96.886	16.415	78.704	-6.329	890.552	70.6307
2019-01-20 01:00:00	10.601	109.737	15.038	105.699	16.109	97.992	17.945	79.919	-5.97	890.778	76.7939
2019-01-20 01:15:00	10.142	110.736	14.273	106.453	15.65	96.985	17.333	75.054	-6.01	890.898	78.5306
2019-01-20 01:30:00	11.672	106.698	13.661	103.158	15.191	98.515	16.874	76.073	-6.098	891.097	63.8156
2019-01-20 01:45:00	11.519	108.853	13.508	106.707	14.426	101.117	15.956	83.529	-6.525	891.23	59.1924
2019-01-20 02:00:00	12.131	108.769	14.579	108.899	16.109	100.064	16.874	79.717	-6.275	891.323	60.9628
2019-01-20 02:15:00	11.366	115.542	13.202	110.601	14.579	101.377	15.803	80.48	-6.444	891.323	64.3973
2019-01-20 02:30:00	11.672	113.275	13.967	110.437	16.109	101.494	17.18	82.739	-6.4	891.283	71.4083
2019-01-20 02:45:00	11.213	117.206	13.049	114.03	14.732	105.874	15.65	89.718	-6.448	891.443	83.4036
2019-01-20 03:00:00	10.448	118.878	11.519	117.385	13.202	110.025	14.12	90.725	-6.21	891.576	90.7198
2019-01-20 03:15:00	8.765	122.85	10.601	117.839	11.672	108.23	13.049	88.964	-6.21	891.589	94.8487
2019-01-20 03:30:00	10.448	113.946	13.355	114.776	13.814	104.924	15.956	92.696	-5.56	891.563	96.7565
2019-01-20 03:45:00	10.907	123.159	13.508	114.911	14.426	109.91	16.262	89.533	-6.153	891.563	100.195
2019-01-20 04:00:00	12.743	117.729	14.273	115.116	15.191	108.861	15.497	89.124	-5.899	891.589	101.212
2019-01-20 04:15:00	11.366	123.132	14.732	118.364	15.497	109.272	16.568	96.009	-5.8	891.563	102.653
2019-01-20 04:30:00	11.06	126.362	12.59	121.341	15.497	109.614	16.262	98.893	-5.441	891.762	105.279
2019-01-20 04:45:00	12.59	119.83	14.12	120.414	14.579	112.287	14.732	96.463	-5.793	891.523	109.315
2019-01-20 05:00:00	11.06	120.996	13.967	117.294	13.967	112.602	13.967	99.061	-5.834	891.602	112.028
2019-01-20 05:15:00	12.284	112.132	14.579	113.003	15.497	106.167	14.426	97.738	-5.841	891.496	113.202
2019-01-20 05:30:00	13.508	111.572	15.038	117.645	15.65	110.591	14.885	96.861	-5.682	891.177	118.069
2019-01-20 05:45:00	11.366	112.817	14.579	109.408	15.803	104.537	13.814	96.835	-5.712	891.031	116.46
2019-01-20 06:00:00	12.896	105.616	15.038	108.509	15.344	102.707	15.497	93.883	-6.078	890.791	112.993
2019-01-20 06:15:00	11.825	111.829	14.426	110.628	14.732	105.864	14.732	98.398	-6.566	890.645	108.285
2019-01-20 06:30:00	11.825	113.235	15.038	115.579	15.038	112.539	15.344	101.025	-6.586	890.232	107.755
2019-01-20 06:45:00	10.295	115.913	11.825	119.799	13.049	114.766	15.038	107.065	-6.535	890.166	102.087
2019-01-20 07:00:00	11.06	123.538	13.202	126.01	14.273	119.939	17.027	105.133	-6.335	890.232	96.4689
2019-01-20 07:15:00	15.038	136.558	17.945	127.314	20.24	120.316	21.77	103.484	-4.676	890.126	94.0841
2019-01-20 07:30:00	13.967	139.225	17.639	128.411	20.393	118.201	21.923	105.425	-4.825	890.126	94.0269
2019-01-20 07:45:00	15.191	130.089	18.557	127.376	19.781	118.149	20.852	107.194	-5.305	890.033	87.5533
2019-01-20 08:00:00	14.885	130.308	18.251	122.74	19.016	115.577	19.781	104.414	-5.448	890.006	80.0221
2019-01-20 08:15:00	13.814	129.507	17.333	121.381	19.322	113.834	20.546	97.273	-5.783	889.98	77.4854
2019-01-20 08:30:00	14.579	124.547	16.262	121.533	18.251	115.958	20.699	97.093	-5.746	890.033	76.5417
2019-01-20 08:45:00	13.661	130.987	17.18	119.145	19.169	113.287	20.087	99.459	-5.865	889.807	81.0595
2019-01-20 09:00:00	14.885	125.645	18.098	120.811	19.628	113.574	20.546	94.435	-5.936	889.94	78.3147
2019-01-20 09:15:00	15.038	124.503	18.557	116.245	19.934	111.03	21.005	96.222	-5.933	889.834	86.7723
2019-01-20 09:30:00	15.65	119.526	18.863	117.574	21.158	114.236	21.77	94.587	-5.923	889.74	87.5521
2019-01-20 09:45:00	14.885	122.327	19.016	120.262	19.781	118.294	21.005	99.509	-6.013	889.953	81.7272
2019-01-20 10:00:00	13.967	122.395	15.65	118.313	18.098	112.226	18.251	96.833	-6.308	890.246	79.0278
2019-01-20 10:15:00	14.426	123.524	17.18	117.247	18.863	110.494	17.945	91.689	-6.491	890.02	72.3116
2019-01-20 10:30:00	15.497	121.292	17.639	115.16	18.557	108.384	18.71	95.022	-6.397	889.701	67.1515
2019-01-20 10:45:00	14.885	121.019	18.404	116.147	20.546	109.027	20.393	93.823	-6.363	889.966	71.9937
2019-01-20 11:00:00	16.415	121.141	18.71	114.86	19.934	112.76	19.628	97.853	-6.264	889.913	76.1881
2019-01-20 11:15:00	16.415	118.911	19.934	118.558	19.322	113.477	19.322	94.625	-6.221	889.953	75.3873
2019-01-20 11:30:00	16.109	117.952	17.486	114.377	18.251	105.268	18.251	91.28	-5.976	890.059	80.3714
2019-01-20 11:45:00	15.956	119.228	17.945	114.397	17.792	112.534	17.945	99.43	-5.722	890.152	85.938
2019-01-20 12:00:00	16.415	112.75	17.486	119.186	18.557	111.759	18.557	87.233	-5.594	890.113	74.1932
2019-01-20 12:15:00	15.497	121.555	17.945	116.29	19.934	114.281	20.24	98.339	-5.319	890.192	42.1229
2019-01-20 12:30:00	15.497	119.983	17.027	117.24	19.016	112.728	20.087	111.918	-5.207	890.352	33.1972
2019-01-20 12:45:00	15.497	122.44	18.71	119.102	19.475	112.612	20.699	70.743	-4.709	890.392	27.5863
2019-01-20 13:00:00	16.262	124.093	17.792	117.013	18.404	111.644	19.169	71.433	-4.808	890.325	26.5187
2019-01-20 13:15:00	19.169	115.384	19.475	118.373	19.934	108.669	20.24	70.383	-5.041	889.661	25.0155
2019-01-20 13:30:00	16.262	126.495	18.098	116.209	19.322	105.836	20.546	64.203	-4.862	890.046	23.2825
2019-01-20 13:45:00	18.098	127.74	20.546	118.887	21.464	110.037	21.923	79.064	-4.784	889.661	22.8946
2019-01-20 14:00:00	17.639	121.473	19.628	121.176	21.311	113.488	20.852	73.211	-4.672	889.222	22.0505
2019-01-20 14:15:00	17.027	119.049	18.71	121.562	19.934	112.862	21.158	58.64	-4.476	889.248	22.3308
2019-01-20 14:30:00	16.568	130.779	21.005	119.392	21.77	111.795	23.3	81.284	-4.384	888.876	23.2892
2019-01-20 14:45:00	18.098	118.331	20.393	114.56	22.535	107.049	22.841	44.175	-4.327	888.623	24.0635
2019-01-20 15:00:00	16.721	124.739	19.475	119.072	21.158	108.262	21.77	41.416	-4.072	888.33	23.2489
2019-01-20 15:15:00	17.18	116.078	20.699	117.256	21.158	108.953	22.994	42.03	-4.405	888.397	23.7481
2019-01-20 15:30:00	16.109	134.652	17.027	123.133	17.486	112.449	18.71	51.791	-3.734	888.477	26.0995
2019-01-20 15:45:00	15.803	132.064	17.945	121.243	18.404	114.548	19.322	16.676	-3.443	888.237	27.7271
2019-01-20 16:00:00	17.18	121.285	20.393	117.509	21.158	108.955	21.617	4.678	-3.5	887.852	26.4307
2019-01-20 16:15:00	18.098	120.612	20.546	120.574	21.005	109.184	21.77	10.568	-3.571	887.466	26.9212
2019-01-20 16:30:00	17.333	128.385	20.087	122.442	21.005	113.745	21.617	29.894	-3.608	887.519	26.4142
2019-01-20 16:45:00	17.639	123.646	20.393	121.058	20.24	112.348	21.005	23.297	-3.788	887.214	23.1821
2019-01-20 17:00:00	15.65	117.732	17.486	117.22	17.486	110.953	18.557	29.349	-3.964	887.347	25.5571
2019-01-20 17:15:00	15.956	119.21	19.016	117.951	19.934	110.704	21.923	92.041	-3.924	887.08	36.9108
2019-01-20 17:30:00	16.109	120.016	18.251	120.883	19.475	112.883	20.087	84.206	-3.971	887.4	39.4484
2019-01-20 17:45:00	15.497	115.619	17.18	117.794	17.945	109.568	19.628	31.465	-4.269	886.974	48.0426
2019-01-20 18:00:00	15.344	119.31	17.18	112.028	19.016	106.434	19.628	25.931	-4.398	887.027	67.0369
2019-01-20 18:15:00	16.109	112.454	18.098	109.685	18.404	101.597	19.016	55.735	-5.746	886.708	72.0387
2019-01-20 18:30:00	15.497	113.064	17.486	108.039	18.863	106.873	18.863	34.544	-6.325	886.176	61.6004
2019-01-20 18:45:00	14.579	108.374	19.016	108.462	20.087	102.314	20.852	74.441	-6.542	885.883	55.9561
2019-01-20 19:00:00	17.027	112.744	19.628	112.104	21.005	105.606	21.617	85.636	-6.715	885.697	49.4075
2019-01-20 19:15:00	14.12	117.259	17.486	115.841	18.557	108.964	20.393	92.611	-6.63	885.644	44.4064
2019-01-20 19:30:00	15.191	125.146	17.18	119.115	18.557	113.737	19.781	104.788	-6.688	885.205	39.5783
2019-01-20 19:45:00	15.191	123.278	17.18	122.572	20.087	111.618	21.311	104.925	-6.475	885.325	36.3298
2019-01-20 20:00:00	14.885	123.32	17.792	119.112	19.322	115.702	20.852	108.991	-6.376	885.245	35.5168
2019-01-20 20:15:00	14.579	115.369	17.639	118.843	20.393	113.471	21.311	107.361	-6.241	885.258	38.5832
2019-01-20 20:30:00	18.557	113.09	19.169	118.737	20.546	108.29	20.852	104.122	-5.959	884.699	42.9186
2019-01-20 20:45:00	17.333	127.527	20.699	126.784	20.852	118.612	21.617	110.785	-5.251	885.019	47.234
2019-01-20 21:00:00	17.027	130.314	20.546	123.74	21.617	116.08	22.229	110.03	-5.356	884.779	49.1929
2019-01-20 21:15:00	16.568	130.168	19.934	128.206	21.005	121.474	22.229	114.601	-4.909	884.886	53.5576
2019-01-20 21:30:00	15.803	126.637	19.016	124.445	21.311	118.05	22.688	110.93	-5.838	884.753	55.9969
2019-01-20 21:45:00	15.956	134.673	20.393	128.903	22.076	120.626	23.759	113.23	-6.125	884.779	49.9387
2019-01-20 22:00:00	15.191	143.903	19.781	135.567	21.77	124.043	23.453	114.531	-6.288	884.447	59.3899
2019-01-20 22:15:00	16.874	140.858	21.464	130.939	23.3	122.436	24.218	112.791	-5.983	884.274	55.6343
2019-01-20 22:30:00	16.109	144.766	20.546	135.639	20.852	125.929	22.841	107.376	-6.122	883.929	56.7797
2019-01-20 22:45:00	15.038	144.902	19.628	136.027	21.158	126.47	22.076	104.386	-6.2	884.287	61.8035
2019-01-20 23:00:00	16.262	142.83	20.087	134.689	21.464	125.688	22.688	109.086	-6.241	883.796	67.128
2019-01-20 23:15:00	16.568	146.864	19.934	136.976	21.158	125.704	22.535	111.876	-6.007	883.609	58.8491
2019-01-20 23:30:00	17.027	149.972	19.781	143.806	22.841	134.319	24.524	119.75	-5.946	883.303	53.4551
2019-01-20 23:45:00	17.945	149.617	20.546	143.828	23.912	136.27	26.207	121.28	-5.302	883.103	46.181
2019-01-21 00:00:00	17.333	151.201	21.005	145.359	24.218	135.675	25.901	123.411	-5.014	883.09	27.9243
2019-01-21 00:15:00	15.956	152.429	20.087	145.641	21.005	133.731	24.524	118.125	-4.896	883.33	47.2706
2019-01-21 00:30:00	18.251	151.286	20.852	143.189	23.606	134.683	24.83	119.72	-4.943	882.931	50.2621
2019-01-21 00:45:00	19.169	154.395	20.546	147.375	23.606	133.917	24.677	119.245	-4.974	882.877	54.5103
2019-01-21 01:00:00	18.098	153.023	21.464	147.397	24.218	137.776	24.983	122.104	-4.906	882.97	70.8569
2019-01-21 01:15:00	16.721	157.454	19.169	148.614	22.076	138.506	24.524	124.706	-4.713	882.864	73.7934
2019-01-21 01:30:00	15.65	160.912	18.71	149.279	20.699	139.6	22.994	127.656	-4.95	883.184	62.7317
2019-01-21 01:45:00	16.262	158.518	20.087	154.063	22.382	141.742	24.983	129.126	-4.52	882.651	54.4041
2019-01-21 02:00:00	16.721	157.321	19.781	151.733	21.923	138.815	24.83	127.002	-4.533	882.479	56.8564
2019-01-21 02:15:00	17.792	159.046	21.005	152.802	22.994	139.431	24.83	125.213	-4.391	882.186	60.8436
2019-01-21 02:30:00	16.721	160.068	20.546	153.594	23.3	141.171	24.983	129.15	-4.15	882.332	75.0988
2019-01-21 02:45:00	15.956	160.31	18.863	153.893	20.852	143.012	22.994	127.427	-4.073	881.774	88.2019
2019-01-21 03:00:00	18.557	159.769	21.158	152.764	23.147	142.279	24.218	127.961	-3.944	881.641	89.7251
2019-01-21 03:15:00	17.18	162.99	21.464	152.179	22.229	137.935	24.371	126.637	-3.768	881.494	95.5651
2019-01-21 03:30:00	17.027	154.469	19.934	151.539	22.076	142.253	24.218	127.69	-3.46	881.494	96.7181
2019-01-21 03:45:00	15.344	153.716	19.934	148.704	23.606	141.293	25.289	127.883	-3.67	881.521	94.2301
2019-01-21 04:00:00	16.874	160.001	20.852	153.747	21.158	142.576	23.147	129.189	-3.714	881.189	100.831
2019-01-21 04:15:00	17.945	159.232	18.404	153.451	20.087	145.413	22.076	130.724	-3.632	881.508	102.194
2019-01-21 04:30:00	17.18	156.427	19.628	154.895	21.464	145.117	22.994	130.621	-3.646	881.149	104.304
2019-01-21 04:45:00	17.18	156.912	19.169	152.147	20.699	143.946	22.382	129.884	-3.788	881.282	109.894
2019-01-21 05:00:00	15.65	158.247	17.639	153.251	20.546	144.06	21.617	130.843	-3.859	881.415	114.722
2019-01-21 05:15:00	15.803	163.138	18.557	156.179	20.393	147.817	20.546	130.198	-3.578	881.255	113.746
2019-01-21 05:30:00	15.65	160.127	17.18	152.398	18.863	146.967	19.934	132.124	-3.741	881.109	108.808
2019-01-21 05:45:00	15.191	160.847	18.098	156.876	20.24	145.362	21.311	126.495	-3.541	880.856	106.162
2019-01-21 06:00:00	14.426	149.514	16.874	142.897	18.404	138.3	19.934	123.818	-3.764	881.028	94.8711
2019-01-21 06:15:00	15.956	152.581	17.792	152.285	20.087	144.062	21.464	129.604	-3.693	880.909	86.5768
2019-01-21 06:30:00	14.579	142.888	16.874	145.962	18.71	136.96	20.546	119.421	-4.13	881.042	80.2221
2019-01-21 06:45:00	14.579	142.837	18.098	139.741	18.71	133.734	20.546	117.539	-4.462	880.67	73.8037
2019-01-21 07:00:00	14.579	148.878	18.557	138.48	19.781	135.65	20.546	119.094	-4.137	880.643	67.4563
2019-01-21 07:15:00	14.732	140.367	17.639	139.031	18.863	133.817	19.475	118.814	-4.079	880.497	62.7483
2019-01-21 07:30:00	12.59	139.703	14.426	143.025	15.344	134.954	17.027	122.139	-4.306	880.696	69.3835
2019-01-21 07:45:00	11.06	134.508	12.743	140.391	14.579	136.733	15.956	124.929	-4.195	881.148	76.5058
2019-01-21 08:00:00	10.142	131.405	13.355	134.357	14.732	133.796	15.803	124.642	-4.191	881.042	65.9422
2019-01-21 08:15:00	10.754	140.049	14.426	134.65	15.497	126.976	17.027	120.966	-3.585	881.055	61.9428
2019-01-21 08:30:00	13.967	107.081	15.803	107.694	16.568	104.751	16.109	93.997	-6.593	880.829	63.8119
2019-01-21 08:45:00	12.896	116.269	16.109	111.73	17.027	106.829	16.721	86.226	-7.189	880.629	66.1413
2019-01-21 09:00:00	14.273	108.769	16.874	109.657	16.874	104.674	15.956	91.032	-7.409	880.311	81.5749
2019-01-21 09:15:00	14.12	111.355	17.639	111.276	18.557	101.811	18.557	74.547	-7.565	880.51	97.7782
2019-01-21 09:30:00	15.038	120.817	17.792	116.261	18.098	108.894	17.639	84.749	-6.264	880.324	100.354
2019-01-21 09:45:00	15.344	123.354	16.415	119.33	17.18	115.26	16.874	89.508	-7.023	880.776	91.6287
2019-01-21 10:00:00	13.814	116.401	16.568	115.915	17.18	109.694	15.803	89.291	-7.328	880.896	84.0497
2019-01-21 10:15:00	13.355	118.601	15.803	117.548	16.109	112.44	15.497	87.435	-7.341	881.095	76.0001
2019-01-21 10:30:00	13.049	120.462	15.65	116.868	16.721	111.753	17.027	93.554	-7.006	881.242	62.6864
2019-01-21 10:45:00	12.743	119.832	16.109	114.114	16.874	105.742	17.945	92.55	-6.504	881.535	48.8075
2019-01-21 11:00:00	14.579	120.642	16.262	118.313	17.333	111.257	18.251	101.512	-5.834	881.481	43.9077
2019-01-21 11:15:00	14.579	114.801	15.038	112.806	17.027	106.233	17.639	98.715	-5.207	881.694	52.6822
2019-01-21 11:30:00	15.344	115.843	17.333	114.492	17.639	105.481	19.628	88.101	-4.95	881.681	58.571
2019-01-21 11:45:00	14.579	120.551	16.874	113.831	17.792	104.949	19.628	85.691	-4.482	881.867	51.1468
2019-01-21 12:00:00	13.814	118.356	17.639	113.903	18.863	106.385	19.781	100.308	-4.293	882.013	39.1817
2019-01-21 12:15:00	15.344	112.096	17.333	111.913	18.098	104.167	18.71	97.538	-4.076	881.827	29.2527
2019-01-21 12:30:00	17.639	118.222	18.863	109.214	19.781	106.741	19.934	87.431	-3.663	881.8	26.5025
2019-01-21 12:45:00	17.945	114.451	19.169	114.194	19.016	108.778	20.393	91.264	-4.127	882.027	26.0874
2019-01-21 13:00:00	17.639	123.707	19.628	113.965	19.322	103.789	20.546	88.544	-3.944	881.561	27.9123
2019-01-21 13:15:00	16.721	110.845	18.404	107.891	19.628	101.388	19.934	79.493	-3.317	881.654	26.4285
2019-01-21 13:30:00	17.18	110.739	19.016	108.268	19.628	99.421	19.169	23.955	-3.697	881.481	21.9845
2019-01-21 13:45:00	15.191	113.86	19.934	110.383	19.322	101.74	20.24	31.742	-3.625	881.614	21.8565
2019-01-21 14:00:00	16.568	115.012	18.404	108.505	19.781	100.032	20.546	24.402	-3.588	881.361	21.5249
2019-01-21 14:15:00	17.333	120.797	19.475	113.956	19.475	102.54	19.781	18.667	-3.432	881.321	21.6249
2019-01-21 14:30:00	17.18	116.009	18.251	109.745	18.557	103.033	19.475	18.667	-3.372	881.042	22.2911
2019-01-21 14:45:00	15.956	114.955	19.475	112.125	19.781	105.621	19.322	55.458	-3.266	881.042	22.6477
2019-01-21 15:00:00	15.497	116.361	18.404	110.026	18.863	103.919	19.475	15.714	-3.219	881.095	22.7645
2019-01-21 15:15:00	15.65	115.657	19.016	113.261	18.098	103.5	18.557	39.46	-3.256	881.082	24.1509
2019-01-21 15:30:00	14.12	115.974	16.109	108.921	15.65	100.997	17.486	6.963	-2.731	881.069	23.7112
2019-01-21 15:45:00	15.344	114.073	16.109	111.448	17.792	102.54	18.404	57.489	-2.894	880.842	28.9805
2019-01-21 16:00:00	13.967	115.717	16.415	110.346	17.027	102.498	17.18	23.107	-2.525	881.082	33.0896
2019-01-21 16:15:00	14.12	111.837	16.262	107.729	16.874	98.032	17.486	40.071	-2.582	881.215	40.7626
2019-01-21 16:30:00	12.437	107.843	14.885	105.207	15.65	94.884	16.262	52.253	-2.521	881.295	46.6283
2019-01-21 16:45:00	12.131	104.326	13.661	104.567	15.497	98.407	15.038	25.526	-2.691	881.668	60.3929
2019-01-21 17:00:00	13.049	108.086	14.426	109.032	15.191	96.819	15.803	10.048	-3.358	881.96	68.1755
2019-01-21 17:15:00	12.131	115.32	13.661	107.414	14.885	98.766	15.038	9.922	-3.48	882.173	83.1254
2019-01-21 17:30:00	10.601	113.973	11.978	106.04	11.978	99.479	11.672	27.867	-3.774	882.479	64.0009
2019-01-21 17:45:00	10.907	109.133	12.131	110.556	13.508	100.928	14.579	51.729	-3.958	882.545	72.1816
2019-01-21 18:00:00	6.623	129.753	7.541	117.634	7.694	108.582	8.459	40.324	-3.828	883.223	57.7484
2019-01-21 18:15:00	3.563	183.691	4.175	174.46	4.175	154.344	4.175	116.284	-3.768	884.141	40.2663
2019-01-21 18:30:00	6.164	255.694	6.623	262.167	6.776	248.786	6.929	217.29	-7.426	884.394	25.5687
2019-01-21 18:45:00	5.246	288.637	5.399	283.294	5.399	270.208	5.858	230.434	-7.616	884.287	17.6999
2019-01-21 19:00:00	3.716	307.531	4.328	297.281	4.94	283.842	4.787	249.964	-7.799	884.3	27.7075
2019-01-21 19:15:00	3.104	293.746	3.563	286.886	4.022	273.283	4.175	235.06	-7.755	884.46	21.0506
2019-01-21 19:30:00	2.033	283.435	2.798	279.743	3.104	271.386	3.41	235.323	-7.65	884.7	5.06493
[truncated: 68,177 more rows]
