# Supplementary material
Source: PeerJ journal article supplement (doi:10.7717/peerj-cs.3610)
Supplement: Wind_farm_site_3_Nominal_capacity99MW.xlsx [file Wind_farm_site_3_Nominal_capacity99MW.xlsx]

## Sheet: sheet1
Time(year-month-day h:m:s)	Wind speed at height of 10 meters (m/s)	Wind direction at height of 10 meters (˚)	Wind speed at height of 30 meters (m/s)	Wind direction at height of 30 meters (˚)	Wind speed at height of 50 meters (m/s)	Wind direction at height of 50 meters (˚)	Wind speed - at the height of wheel hub (m/s)	Wind speed - at the height of wheel hub (˚)	Air temperature (°C)	Atmosphere (hpa)	Relative humidity (%)	Power (MW)
2019-01-01	2.32218	317.431	2.59042	312.468	1.62735	351.117	2.34887	313.33	26.46	984.37	31.7949	-0.36579
2019-01-01 00:15:00	2.32218	317.431	2.59042	312.468	1.62735	351.117	2.34887	313.33	26.46	984.37	31.7949	-0.376874
2019-01-01 00:30:00	2.32218	317.431	2.59042	312.468	1.62735	351.117	2.34887	313.33	26.46	984.37	31.7949	-0.387959
2019-01-01 00:45:00	2.32218	317.431	2.59042	312.468	1.62735	351.117	2.34887	313.33	26.46	984.37	31.7949	-0.395348
2019-01-01 01:00:00	2.32218	317.431	2.59042	312.468	1.62735	351.117	2.34887	313.33	26.46	984.37	31.7949	-0.384264
2019-01-01 01:15:00	2.32218	317.431	2.59042	312.468	1.62735	351.117	2.34887	313.33	26.46	984.37	31.7949	-0.406433
2019-01-01 01:30:00	2.32218	317.431	2.59042	312.468	1.62735	351.117	2.34887	313.33	26.46	984.37	31.7949	-0.384264
2019-01-01 01:45:00	2.32218	317.431	2.59042	312.468	1.62735	351.117	2.34887	313.33	26.46	984.37	31.7949	-0.395348
2019-01-01 02:00:00	2.32218	317.431	2.59042	312.468	1.62735	351.117	2.34887	313.33	26.46	984.37	31.7949	-0.395348
2019-01-01 02:15:00	2.32218	317.431	2.59042	312.468	1.62735	351.117	2.34887	313.33	26.46	984.37	31.7949	-0.387959
2019-01-01 02:30:00	2.32218	317.431	2.59042	312.468	1.62735	351.117	2.34887	313.33	26.46	984.37	31.7949	-0.410128
2019-01-01 02:45:00	2.32218	317.431	2.59042	312.468	1.62735	351.117	2.34887	313.33	26.46	984.37	31.7949	-0.384264
2019-01-01 03:00:00	2.32218	317.431	2.59042	312.468	1.62735	351.117	2.34887	313.33	26.46	984.37	31.7949	-0.395348
2019-01-01 03:15:00	2.32218	317.431	2.59042	312.468	1.62735	351.117	2.34887	313.33	26.46	984.37	31.7949	-0.424907
2019-01-01 03:30:00	2.32218	317.431	2.59042	312.468	1.62735	351.117	2.34887	313.33	26.46	984.37	31.7949	-0.443381
2019-01-01 03:45:00	2.32218	317.431	2.59042	312.468	1.62735	351.117	2.34887	313.33	26.46	984.37	31.7949	-0.413823
2019-01-01 04:00:00	2.32218	317.431	2.59042	312.468	1.62735	351.117	2.34887	313.33	26.46	984.37	31.7949	-0.369485
2019-01-01 04:15:00	2.32218	317.431	2.59042	312.468	1.62735	351.117	2.34887	313.33	26.46	984.37	31.7949	-0.387959
2019-01-01 04:30:00	2.32218	317.431	2.59042	312.468	1.62735	351.117	2.34887	313.33	26.46	984.37	31.7949	-0.399043
2019-01-01 04:45:00	2.32218	317.431	2.59042	312.468	1.62735	351.117	2.34887	313.33	26.46	984.37	31.7949	-0.406433
2019-01-01 05:00:00	2.32218	317.431	2.59042	312.468	1.62735	351.117	2.34887	313.33	26.46	984.37	31.7949	-0.424907
2019-01-01 05:15:00	2.32218	317.431	2.59042	312.468	1.62735	351.117	2.34887	313.33	26.46	984.37	31.7949	-0.395348
2019-01-01 05:30:00	2.32218	317.431	2.59042	312.468	1.62735	351.117	2.34887	313.33	26.46	984.37	31.7949	-0.421212
2019-01-01 05:45:00	2.32218	317.431	2.59042	312.468	1.62735	351.117	2.34887	313.33	26.46	984.37	31.7949	-0.424907
2019-01-01 06:00:00	2.32218	317.431	2.59042	312.468	1.62735	351.117	2.34887	313.33	26.46	984.37	31.7949	-0.3584
2019-01-01 06:15:00	2.32218	317.431	2.59042	312.468	1.62735	351.117	2.34887	313.33	26.46	984.37	31.7949	-0.36579
2019-01-01 06:30:00	2.32218	317.431	2.59042	312.468	1.62735	351.117	2.34887	313.33	26.46	984.37	31.7949	-0.387959
2019-01-01 06:45:00	2.32218	317.431	2.59042	312.468	1.62735	351.117	2.34887	313.33	26.46	984.37	31.7949	-0.3584
2019-01-01 07:00:00	2.32218	317.431	2.59042	312.468	1.62735	351.117	2.34887	313.33	26.46	984.37	31.7949	-0.410128
2019-01-01 07:15:00	2.32218	317.431	2.59042	312.468	1.62735	351.117	2.34887	313.33	26.46	984.37	31.7949	-0.417518
2019-01-01 07:30:00	2.32218	317.431	2.59042	312.468	1.62735	351.117	2.34887	313.33	26.46	984.37	31.7949	-0.380569
2019-01-01 07:45:00	2.32218	317.431	2.59042	312.468	1.62735	351.117	2.34887	313.33	26.46	984.37	31.7949	-0.35101
2019-01-01 08:00:00	3.15867	244.324	2.40533	203.349	1.894	195.098	3.17233	253.847	26.46	984.595	31.7362	-0.339926
2019-01-01 08:15:00	2.90333	232.416	2.661	198.791	1.894	187.095	3.17233	241.598	26.46	985.092	30.7798	-0.432297
2019-01-01 08:30:00	2.90333	228.702	2.91667	209.8	2.14967	186.115	3.17233	237.296	26.46	985.346	29.5482	-0.376874
2019-01-01 08:45:00	2.90333	240.287	2.14967	209.398	1.38267	195.072	2.661	252.69	26.46	985.28	29.4752	-0.395348
2019-01-01 09:00:00	1.62667	245.763	0	219.246	0.375667	208.977	1.894	245.47	26.46	985.561	29.8121	-0.387959
2019-01-01 09:15:00	1.882	251.865	1.63833	191.686	0.751333	199.725	1.894	264.07	26.46	985.857	29.4701	-0.387959
2019-01-01 09:30:00	1.882	256.412	1.894	230.578	1.894	233.616	2.14967	256.973	26.46	986.6	29.7045	-0.376874
2019-01-01 09:45:00	1.37133	249.723	1.63833	236.654	1.127	244.207	1.38267	262.292	26.46	986.749	29.6702	-0.387959
2019-01-01 10:00:00	0	255.696	0.751333	241.552	1.127	242.57	0	269.365	26.46	986.654	30.3842	-0.376874
2019-01-01 10:15:00	0	261.838	0.751333	238.715	0	228.803	0	254.787	26.46	986.595	29.7285	-0.376874
2019-01-01 10:30:00	0	254.169	1.63833	260.249	1.38267	236.7	0.751333	265.684	26.46	986.744	28.9758	-0.384264
2019-01-01 10:45:00	0	274.015	1.38267	264.115	0	236.793	0.751333	258.841	26.46	986.743	29.3162	-0.384264
2019-01-01 11:00:00	1.882	287.456	1.894	277.626	1.63833	244.237	2.14967	257.163	26.46	986.175	29.5818	-0.347315
2019-01-01 11:15:00	1.62667	276.893	2.14967	290.916	2.14967	248.333	1.894	277.6	26.46	986.441	30.1623	-0.354705
2019-01-01 11:30:00	2.39267	276.917	2.91667	287.087	1.894	253.504	2.91667	301.234	26.46	986.144	30.4697	-0.354705
2019-01-01 11:45:00	0.744	273.796	0.751333	279.258	1.894	253.504	1.127	279.82	26.46	986.144	30.6746	-0.36579
2019-01-01 12:00:00	1.37133	272.82	3.428	281.112	1.38267	255.26	1.63833	284.283	26.46	985.847	30.6063	-0.369485
2019-01-01 12:15:00	1.116	314.672	1.894	298.867	2.661	255.845	1.38267	298.039	26.46	985.847	30.6405	-0.336231
2019-01-01 12:30:00	2.39267	311.965	2.14967	297.721	2.661	256.625	2.661	307.063	26.46	985.55	31.3578	-0.35101
2019-01-01 12:45:00	3.66933	302.77	3.68367	296.965	4.962	258.869	3.68367	285.6	26.46	985.55	30.8796	-0.387959
2019-01-01 13:00:00	1.62667	261.04	2.14967	257.113	2.661	250.87	1.894	238.577	26.46	985.253	32.2801	-0.347315
2019-01-01 13:15:00	3.414	305.258	3.428	307.428	2.661	251.967	3.17233	291.185	26.46	985.253	31.4945	-0.336231
2019-01-01 13:30:00	3.414	273.235	3.17233	282.892	1.63833	252.528	3.428	290.283	26.46	984.956	31.7677	-0.36579
2019-01-01 13:45:00	2.13733	300.38	2.14967	319.354	2.661	252.626	2.40533	297.624	26.46	985.253	31.1529	-0.354705
2019-01-01 14:00:00	1.62667	279.503	1.63833	273.014	2.40533	252.528	1.894	283.015	26.46	985.253	31.4945	-0.354705
2019-01-01 14:15:00	3.15867	285.78	3.17233	288.658	3.17233	252.463	2.91667	284.243	26.46	985.015	33.2717	-0.347315
2019-01-01 14:30:00	3.15867	299.374	3.17233	293.328	2.40533	252.585	3.17233	292.226	26.46	985.254	33.1415	-0.36579
2019-01-01 14:45:00	2.39267	288.911	3.428	280.109	3.428	252.51	2.661	272.345	26.46	985.255	32.6662	-0.354705
2019-01-01 15:00:00	1.62667	311.557	3.17233	285.019	3.17233	252.466	1.894	277.571	26.46	985.838	32.8034	-0.36579
2019-01-01 15:15:00	2.39267	300.851	1.63833	312.224	1.63833	252.498	2.14967	335.42	26.46	985.53	31.913	-0.354705
2019-01-01 15:30:00	1.882	12.393	2.40533	35.8174	0.751333	252.496	1.894	14.5399	26.46	985.257	32.4935	-0.36579
2019-01-01 15:45:00	2.13733	354.222	3.17233	6.2007	1.894	252.493	1.894	354.124	26.46	985.553	33.3131	-0.387959
2019-01-01 16:00:00	2.13733	19.591	1.894	25.6717	2.14967	252.609	1.63833	356.103	26.46	985.103	34.7849	-0.402738
2019-01-01 16:15:00	2.90333	349.961	1.894	8.88692	2.91667	253.371	2.91667	349.376	26.46	984.662	35.5373	-0.387959
2019-01-01 16:30:00	1.882	356.928	2.91667	6.72622	3.17233	253.519	2.91667	355.952	26.46	984.068	35.9512	-0.395348
2019-01-01 16:45:00	2.39267	356.912	3.68367	15.1188	2.91667	253.529	3.17233	356.424	26.46	984.057	36.3012	-0.439687
2019-01-01 17:00:00	2.90333	85.4701	3.17233	9.70063	2.40533	253.384	1.894	356.817	26.46	983.775	36.8484	-0.406433
2019-01-01 17:15:00	2.39267	0.0976299	2.14967	9.11382	1.63833	253.408	1.894	1.70859	26.46	983.329	36.9887	-0.258639
2019-01-01 17:30:00	1.37133	0.0976299	2.40533	7.94135	1.63833	253.427	2.14967	0.292922	26.46	983.477	37.1965	-0.240165
2019-01-01 17:45:00	1.116	85.4603	2.661	8.52718	1.63833	253.403	1.894	0.292923	26.46	983.477	36.9231	-0.332536
2019-01-01 18:00:00	1.882	85.3382	2.14967	8.47836	1.127	253.354	1.38267	0.341744	26.46	983.626	37.0598	-0.262334
2019-01-01 18:15:00	1.882	85.2406	1.63833	0.211689	1.63833	253.378	1.63833	0.341744	26.46	983.477	37.0598	-0.36579
2019-01-01 18:30:00	2.648	0.097641	2.661	0.114048	1.894	253.378	2.14967	2.53867	26.46	983.775	36.9231	-0.376874
2019-01-01 18:45:00	1.882	1.36697	1.894	0.114048	0	253.33	1.63833	3.07569	26.46	983.481	37.5726	-0.410128
2019-01-01 19:00:00	0.744	0.097641	1.63833	0.764721	1.127	253.33	1.38267	3.02687	26.46	983.63	37.1282	-0.36579
2019-01-01 19:15:00	0.744	0.097641	1.127	0.764336	1.127	253.334	1.38267	3.02691	26.46	983.627	36.8553	-0.376874
2019-01-01 19:30:00	0	0.0976456	1.127	0.323919	0.751333	253.348	0	3.02701	26.46	983.491	36.7548	-0.36579
2019-01-01 19:45:00	0	0.0976476	0	0.323366	0	253.355	0	3.02717	26.46	983.185	36.6532	-0.395348
2019-01-01 20:00:00	0	0.0976523	1.38267	0.322083	0	253.323	0	3.05179	26.46	983.206	37.4763	-0.36579
2019-01-01 20:15:00	0	85.0354	1.127	37.203	0.751333	253.348	0	343.853	26.46	983.26	37.2713	-0.36579
2019-01-01 20:30:00	1.62667	344.561	1.894	326.587	1.63833	253.348	1.63833	343.853	26.46	983.298	37.75	-0.402738
2019-01-01 20:45:00	1.116	341.021	1.38267	325.122	1.127	253.348	1.127	335.088	26.46	983.235	37.3739	-0.395348
2019-01-01 21:00:00	0.744	340.923	1.127	324.439	0.751333	253.348	0	334.99	26.46	983.219	38.9126	-0.406433
2019-01-01 21:15:00	1.116	329.501	1.127	307.084	1.127	253.327	1.127	334.286	26.46	982.998	38.7763	-0.376874
2019-01-01 21:30:00	0	329.498	1.17863	307.056	0.863549	253.325	0.691056	334.283	26.46	982.974	38.776	-0.387959
2019-01-01 21:45:00	0	329.498	1.17863	307.056	0.863549	253.325	0.691056	334.283	26.46	982.974	38.776	-0.376874
2019-01-01 22:00:00	0	329.498	1.17863	307.056	0.863549	253.325	0.691056	334.283	26.46	982.974	38.776	-0.376874
2019-01-01 22:15:00	0	329.498	1.17863	307.056	0.863549	253.325	0.691056	334.283	26.46	982.974	38.776	-0.402738
2019-01-01 22:30:00	0	329.498	1.17863	307.056	0.863549	253.325	0.691056	334.283	26.46	982.974	38.776	-0.387959
2019-01-01 22:45:00	0	329.498	1.17863	307.056	0.863549	253.325	0.691056	334.283	26.46	982.974	38.776	-0.395348
2019-01-01 23:00:00	0	329.498	1.17863	307.056	0.863549	253.325	0.691056	334.283	26.46	982.974	38.776	-0.402738
2019-01-01 23:15:00	0	329.498	1.17863	307.056	0.863549	253.325	0.691056	334.283	26.46	982.974	38.776	-0.384264
2019-01-01 23:30:00	0	329.498	1.17863	307.056	0.863549	253.325	0.691056	334.283	26.46	982.974	38.776	-0.450771
2019-01-01 23:45:00	0	329.498	1.17863	307.056	0.863549	253.325	0.691056	334.283	26.46	982.974	38.776	-0.413823
2019-01-02	0	329.498	1.17863	307.056	0.863549	253.325	0.691056	334.283	26.46	982.974	38.776	-0.439687
2019-01-02 00:15:00	0	329.498	1.17863	307.056	0.863549	253.325	0.691056	334.283	26.46	982.974	38.776	-0.424907
2019-01-02 00:30:00	0	329.498	1.17863	307.056	0.863549	253.325	0.691056	334.283	26.46	982.974	38.776	-0.417518
2019-01-02 00:45:00	0	329.498	1.17863	307.056	0.863549	253.325	0.691056	334.283	26.46	982.974	38.776	-0.395348
2019-01-02 01:00:00	0	329.498	1.17863	307.056	0.863549	253.325	0.691056	334.283	26.46	982.974	38.776	-0.395348
2019-01-02 01:15:00	0	329.498	1.17863	307.056	0.863549	253.325	0.691056	334.283	26.46	982.974	38.776	-0.458161
2019-01-02 01:30:00	0	329.498	1.17863	307.056	0.863549	253.325	0.691056	334.283	26.46	982.974	38.776	-0.424907
2019-01-02 01:45:00	0	329.498	1.17863	307.056	0.863549	253.325	0.691056	334.283	26.46	982.974	38.776	-0.458161
2019-01-02 02:00:00	0	329.498	1.17863	307.056	0.863549	253.325	0.691056	334.283	26.46	982.974	38.776	-0.443381
2019-01-02 02:15:00	0	329.498	1.17863	307.056	0.863549	253.325	0.691056	334.283	26.46	982.974	38.776	-0.424907
2019-01-02 02:30:00	0	329.498	1.17863	307.056	0.863549	253.325	0.691056	334.283	26.46	982.974	38.776	-0.469245
2019-01-02 02:45:00	0	329.498	1.17863	307.056	0.863549	253.325	0.691056	334.283	26.46	982.974	38.776	-0.424907
2019-01-02 03:00:00	0	329.498	1.17863	307.056	0.863549	253.325	0.691056	334.283	26.46	982.974	38.776	-0.450771
2019-01-02 03:15:00	0	329.498	1.17863	307.056	0.863549	253.325	0.691056	334.283	26.46	982.974	38.776	-0.443381
2019-01-02 03:30:00	0	329.498	1.17863	307.056	0.863549	253.325	0.691056	334.283	26.46	982.974	38.776	-0.48772
2019-01-02 03:45:00	0	329.498	1.17863	307.056	0.863549	253.325	0.691056	334.283	26.46	982.974	38.776	-0.469245
2019-01-02 04:00:00	0	329.498	1.17863	307.056	0.863549	253.325	0.691056	334.283	26.46	982.974	38.776	-0.450771
2019-01-02 04:15:00	0	329.498	1.17863	307.056	0.863549	253.325	0.691056	334.283	26.46	982.974	38.776	-0.469245
2019-01-02 04:30:00	0	329.498	1.17863	307.056	0.863549	253.325	0.691056	334.283	26.46	982.974	38.776	-0.476635
2019-01-02 04:45:00	0	329.498	1.17863	307.056	0.863549	253.325	0.691056	334.283	26.46	982.974	38.776	-0.447076
2019-01-02 05:00:00	0	329.498	1.17863	307.056	0.863549	253.325	0.691056	334.283	26.46	982.974	38.776	-0.469245
2019-01-02 05:15:00	0	329.498	1.17863	307.056	0.863549	253.325	0.691056	334.283	26.46	982.974	38.776	-0.48772
2019-01-02 05:30:00	0	329.498	1.17863	307.056	0.863549	253.325	0.691056	334.283	26.46	982.974	38.776	-0.498804
2019-01-02 05:45:00	0	329.498	1.17863	307.056	0.863549	253.325	0.691056	334.283	26.46	982.974	38.776	-0.495109
2019-01-02 06:00:00	0	329.498	1.17863	307.056	0.863549	253.325	0.691056	334.283	26.46	982.974	38.776	-0.498804
2019-01-02 06:15:00	0	329.498	1.17863	307.056	0.863549	253.325	0.691056	334.283	26.46	982.974	38.776	-0.443381
2019-01-02 06:30:00	0	329.498	1.17863	307.056	0.863549	253.325	0.691056	334.283	26.46	982.974	38.776	-0.491414
2019-01-02 06:45:00	0	329.498	1.17863	307.056	0.863549	253.325	0.691056	334.283	26.46	982.974	38.776	-0.498804
2019-01-02 07:00:00	0	329.498	1.17863	307.056	0.863549	253.325	0.691056	334.283	26.46	982.974	38.776	-0.336231
2019-01-02 07:15:00	0	329.498	1.17863	307.056	0.863549	253.325	0.691056	334.283	26.46	982.974	38.776	0.214301
2019-01-02 07:30:00	0	329.498	1.17863	307.056	0.863549	253.325	0.691056	334.283	26.46	982.974	38.776	0.894153
2019-01-02 07:45:00	0	329.498	1.17863	307.056	0.863549	253.325	0.691056	334.283	26.46	982.974	38.776	2.2908
2019-01-02 08:00:00	0	329.498	1.17863	307.056	0.863549	253.325	0.691056	334.283	26.46	982.974	38.776	2.73788
2019-01-02 08:15:00	3.92467	139.522	2.14967	136.224	1.38267	155.052	3.428	142.746	26.46	982.974	38.8494	2.20952
2019-01-02 08:30:00	3.92467	143.638	4.195	127.763	2.91667	149.008	4.195	155.795	26.46	983.187	40.0706	2.00261
2019-01-02 08:45:00	3.15867	154.322	2.14967	172.499	1.894	201.971	3.68367	144.167	26.46	983.181	39.7265	2.06911
2019-01-02 09:00:00	3.92467	138.601	2.91667	152.483	2.661	178.048	4.195	148.268	26.46	983.478	39.453	1.95088
2019-01-02 09:15:00	2.90333	139.066	3.17233	140.641	2.91667	164.253	2.91667	139.457	26.46	983.775	38.2841	2.04325
2019-01-02 09:30:00	2.90333	132.72	3.17233	136.735	3.17233	157.907	3.428	136.381	26.46	984.37	37.1901	2.28711
2019-01-02 09:45:00	2.90333	134.188	2.661	143.739	3.93933	170.937	2.661	135.627	26.46	984.381	36.6374	2.16518
2019-01-02 10:00:00	2.90333	148.534	3.428	143.05	3.68367	150.754	3.17233	159.439	26.46	984.663	35.8791	0.554227
2019-01-02 10:15:00	2.13733	148.26	3.17233	140.118	3.428	175.999	2.40533	144.722	26.46	984.658	35.8096	0.214301
2019-01-02 10:30:00	1.882	152.477	3.428	149.92	3.68367	169.944	1.894	159.82	26.46	984.796	35.3302	0.125625
2019-01-02 10:45:00	1.37133	153.533	2.661	142.412	3.17233	157.021	1.63833	149.093	26.46	984.686	33.8913	-0.0221691
2019-01-02 11:00:00	1.116	150.434	1.894	142.385	2.661	157.995	1.63833	157.58	26.46	984.367	34.0564	-0.177353
2019-01-02 11:15:00	1.37133	153.336	1.894	181.798	3.428	184.604	1.127	176.409	26.46	984.361	32.8608	-0.048033
2019-01-02 11:30:00	2.90333	165.653	2.14967	178.481	1.63833	194.286	2.91667	161.287	26.46	983.767	31.7677	-0.0443382
2019-01-02 11:45:00	0	149.312	2.91667	145.775	1.894	149.605	0.375667	161.312	26.46	983.767	32.2801	-0.214301
2019-01-02 12:00:00	2.39267	168.019	3.17233	160.165	3.17233	169.824	2.661	178.701	26.46	983.767	32.4509	-0.12193
2019-01-02 12:15:00	3.414	163.946	3.428	133.287	3.428	153.287	3.68367	178.579	26.46	983.47	32.7242	-0.188437
2019-01-02 12:30:00	2.648	150.775	2.40533	139.897	3.93933	133.313	2.14967	179.36	26.46	983.173	31.5286	-0.162573
2019-01-02 12:45:00	2.648	136.215	3.68367	131.141	4.70633	129.24	2.91667	125.874	26.46	983.173	30.4355	-0.158878
2019-01-02 13:00:00	3.92467	154.092	3.68367	130.385	3.68367	138.386	3.93933	157.019	26.46	983.173	32.041	-0.0923711
2019-01-02 13:15:00	3.15867	139.751	3.68367	138.97	5.21767	148.141	3.17233	147.336	26.46	983.173	32.5875	0.192132
2019-01-02 13:30:00	2.39267	142.849	4.195	135.117	4.195	151.58	2.14967	128.093	26.46	983.024	32.9291	0.214301
2019-01-02 13:45:00	3.66933	141.337	3.68367	147.165	4.195	149.263	3.428	140.8	26.46	983.024	32.041	0.22908
2019-01-02 14:00:00	3.92467	146.19	4.70633	148.653	4.195	162.775	3.93933	146.971	26.46	982.875	30.8454	0.325146
2019-01-02 14:15:00	2.90333	137.215	3.68367	126.361	3.17233	140.678	2.91667	154.141	26.46	983.173	30.9821	-0.0886763
2019-01-02 14:30:00	3.414	148.629	3.17233	153.604	3.68367	165.019	3.68367	136.508	26.46	983.173	30.3331	0.0812866
2019-01-02 14:45:00	4.69067	145.507	4.45067	137.458	4.195	150.897	4.195	152.58	26.46	983.173	31.2895	0.336231
2019-01-02 15:00:00	3.92467	145.093	5.21767	133.044	4.962	144.166	3.93933	150.97	26.46	982.875	30.9479	0.554227
2019-01-02 15:15:00	3.66933	147.8	4.962	130.873	4.45067	158.092	3.93933	148.727	26.46	982.772	32.0068	1.0752
2019-01-02 15:30:00	4.18	150.518	4.962	132.445	3.68367	135.615	4.45067	158.762	26.46	982.751	30.267	1.25625
2019-01-02 15:45:00	3.15867	168.758	3.93933	147.392	3.93933	151.513	3.17233	170.053	26.46	982.846	31.5688	1.20452
2019-01-02 16:00:00	2.39267	171.751	2.661	173.464	3.428	160.675	2.40533	160.528	26.46	982.582	32.5285	1.28581
2019-01-02 16:15:00	3.15867	156.104	3.428	133.445	2.661	149.445	2.91667	150.494	26.46	982.112	33.8935	0.576396
2019-01-02 16:30:00	2.39267	157.432	3.17233	144.092	3.17233	153.602	2.40533	146.795	26.46	981.681	35.0575	1.17496
2019-01-02 16:45:00	3.414	165.661	3.68367	160.787	3.17233	171.809	3.68367	180.714	26.46	981.392	36.4258	2.2206
2019-01-02 17:00:00	3.66933	162.257	4.45067	152.359	4.195	160.354	3.93933	165.795	26.46	980.798	36.907	2.17257
2019-01-02 17:15:00	4.69067	163.665	4.195	155.087	4.195	150.827	4.70633	161.127	26.46	980.574	36.4377	2.97066
2019-01-02 17:30:00	4.43533	158.737	3.68367	142.496	3.93933	151.659	3.68367	160.324	26.46	980.504	35.4127	3.34014
2019-01-02 17:45:00	4.18	168.866	4.195	153.893	4.195	149.927	4.195	167.011	26.46	980.504	37.327	3.78722
2019-01-02 18:00:00	4.43533	136.576	3.428	148.841	3.17233	157.566	4.195	140.725	26.46	980.206	38.079	5.55335
2019-01-02 18:15:00	5.712	135.503	3.93933	147.328	3.17233	159.64	5.47333	149.585	26.46	980.355	39.0361	5.86372
2019-01-02 18:30:00	5.712	143.389	5.47333	138.594	4.70633	146.586	5.729	151.174	26.46	980.206	38.9685	6.80221
2019-01-02 18:45:00	5.20133	139.546	4.195	141.929	3.68367	157.389	5.47333	148.651	26.46	980.206	38.6305	5.29102
2019-01-02 19:00:00	4.946	146.288	4.195	143.106	3.17233	150.413	4.962	153.342	26.46	980.504	38.8369	4.18995
2019-01-02 19:15:00	4.69067	141.725	2.91667	138.909	2.14967	156.566	4.45067	146.46	26.46	980.355	39.0423	4.23429
2019-01-02 19:30:00	4.69067	144.46	4.45067	141.742	3.93933	150.904	4.70633	150.025	26.46	980.504	39.2479	4.26016
2019-01-02 19:45:00	4.946	150.904	4.195	143.988	3.68367	146.803	4.962	159.008	26.46	980.504	38.5641	3.62834
2019-01-02 20:00:00	4.69067	151.612	4.45067	143.085	3.93933	158.886	4.45067	163.134	26.46	980.801	38.8376	4.35253
2019-01-02 20:15:00	5.20133	154.224	4.70633	143.695	4.70633	153.882	5.47333	159.448	26.46	980.801	38.906	5.39447
2019-01-02 20:30:00	4.69067	152.393	3.93933	139.985	3.428	162.523	4.70633	156.86	26.46	980.801	38.9402	5.68637
2019-01-02 20:45:00	4.946	157.178	2.91667	144.281	3.68367	155.542	4.70633	157.446	26.46	980.504	39.8632	7.72592
2019-01-02 21:00:00	4.946	145.68	2.661	127.438	2.661	147.389	4.70633	188.423	26.46	980.355	40.4102	8.32079
2019-01-02 21:15:00	4.43533	148.561	5.21767	165.176	5.47333	178.146	4.962	153.37	26.46	980.206	40.3761	10.0093
2019-01-02 21:30:00	4.946	155.982	5.21767	157.17	5.729	153.223	5.21767	158.935	26.46	980.206	41.0256	10.3271
2019-01-02 21:45:00	4.69067	158.423	4.70633	163.175	3.17233	153.687	3.68367	156.543	26.46	980.206	41.2308	10.2754
2019-01-02 22:00:00	6.478	152.564	5.729	163.516	5.21767	156.323	6.75167	152.125	26.46	980.206	40.547	11.3173
2019-01-02 22:15:00	5.07367	143.654	5.60117	161.783	3.93933	172.776	5.47333	147.56	26.46	979.909	40.4102	14.4062
2019-01-02 22:30:00	5.07367	143.654	5.60117	161.783	3.93933	172.776	5.47333	147.56	26.46	979.909	40.4102	16.6896
2019-01-02 22:45:00	5.07367	143.654	5.60117	161.783	3.93933	172.776	5.47333	147.56	26.46	979.909	40.4102	19.8081
2019-01-02 23:00:00	5.07367	143.654	5.60117	161.783	3.93933	172.776	5.47333	147.56	26.46	979.909	40.4102	20.3475
2019-01-02 23:15:00	5.07367	143.654	5.60117	161.783	3.93933	172.776	5.47333	147.56	26.46	979.909	40.4102	19.8746
2019-01-02 23:30:00	5.07367	143.654	5.60117	161.783	3.93933	172.776	5.47333	147.56	26.46	979.909	40.4102	22.4536
2019-01-02 23:45:00	5.07367	143.654	5.60117	161.783	3.93933	172.776	5.47333	147.56	26.46	979.909	40.4102	16.2462
2019-01-03	5.07367	143.654	5.60117	161.783	3.93933	172.776	5.47333	147.56	26.46	979.909	40.4102	15.1267
2019-01-03 00:15:00	5.07367	143.654	5.60117	161.783	3.93933	172.776	5.47333	147.56	26.46	979.909	40.4102	14.8828
2019-01-03 00:30:00	5.07367	143.654	5.60117	161.783	3.93933	172.776	5.47333	147.56	26.46	979.909	40.4102	16.2647
2019-01-03 00:45:00	5.07367	143.654	5.60117	161.783	3.93933	172.776	5.47333	147.56	26.46	979.909	40.4102	15.8915
2019-01-03 01:00:00	5.07367	143.654	5.60117	161.783	3.93933	172.776	5.47333	147.56	26.46	979.909	40.4102	17.3842
2019-01-03 01:15:00	5.07367	143.654	5.60117	161.783	3.93933	172.776	5.47333	147.56	26.46	979.909	40.4102	15.9617
2019-01-03 01:30:00	5.07367	143.654	5.60117	161.783	3.93933	172.776	5.47333	147.56	26.46	979.909	40.4102	15.0048
2019-01-03 01:45:00	5.07367	143.654	5.60117	161.783	3.93933	172.776	5.47333	147.56	26.46	979.909	40.4102	16.9778
2019-01-03 02:00:00	5.07367	143.654	5.60117	161.783	3.93933	172.776	5.47333	147.56	26.46	979.909	40.4102	15.4408
2019-01-03 02:15:00	5.07367	143.654	5.60117	161.783	3.93933	172.776	5.47333	147.56	26.46	979.909	40.4102	17.4471
2019-01-03 02:30:00	5.07367	143.654	5.60117	161.783	3.93933	172.776	5.47333	147.56	26.46	979.909	40.4102	16.7487
2019-01-03 02:45:00	5.07367	143.654	5.60117	161.783	3.93933	172.776	5.47333	147.56	26.46	979.909	40.4102	17.7796
2019-01-03 03:00:00	5.07367	143.654	5.60117	161.783	3.93933	172.776	5.47333	147.56	26.46	979.909	40.4102	18.1454
2019-01-03 03:15:00	5.07367	143.654	5.60117	161.783	3.93933	172.776	5.47333	147.56	26.46	979.909	40.4102	22.0139
2019-01-03 03:30:00	5.07367	143.654	5.60117	161.783	3.93933	172.776	5.47333	147.56	26.46	979.909	40.4102	22.6753
2019-01-03 03:45:00	5.07367	143.654	5.60117	161.783	3.93933	172.776	5.47333	147.56	26.46	979.909	40.4102	20.887
2019-01-03 04:00:00	5.07367	143.654	5.60117	161.783	3.93933	172.776	5.47333	147.56	26.46	979.909	40.4102	19.9965
2019-01-03 04:15:00	5.07367	143.654	5.60117	161.783	3.93933	172.776	5.47333	147.56	26.46	979.909	40.4102	23.1186
2019-01-03 04:30:00	5.07367	143.654	5.60117	161.783	3.93933	172.776	5.47333	147.56	26.46	979.909	40.4102	24.8774
2019-01-03 04:45:00	5.07367	143.654	5.60117	161.783	3.93933	172.776	5.47333	147.56	26.46	979.909	40.4102	24.5264
2019-01-03 05:00:00	5.07367	143.654	5.60117	161.783	3.93933	172.776	5.47333	147.56	26.46	979.909	40.4102	26.614
2019-01-03 05:15:00	5.07367	143.654	5.60117	161.783	3.93933	172.776	5.47333	147.56	26.46	979.909	40.4102	30.5527
2019-01-03 05:30:00	5.07367	143.654	5.60117	161.783	3.93933	172.776	5.47333	147.56	26.46	979.909	40.4102	39.6789
2019-01-03 05:45:00	5.07367	143.654	5.60117	161.783	3.93933	172.776	5.47333	147.56	26.46	979.909	40.4102	37.6911
2019-01-03 06:00:00	5.07367	143.654	5.60117	161.783	3.93933	172.776	5.47333	147.56	26.46	979.909	40.4102	35.2598
2019-01-03 06:15:00	5.07367	143.654	5.60117	161.783	3.93933	172.776	5.47333	147.56	26.46	979.909	40.4102	38.4781
2019-01-03 06:30:00	5.07367	143.654	5.60117	161.783	3.93933	172.776	5.47333	147.56	26.46	979.909	40.4102	35.5481
2019-01-03 06:45:00	5.07367	143.654	5.60117	161.783	3.93933	172.776	5.47333	147.56	26.46	979.909	40.4102	39.5275
2019-01-03 07:00:00	5.07367	143.654	5.60117	161.783	3.93933	172.776	5.47333	147.56	26.46	979.909	40.4102	33.0504
2019-01-03 07:15:00	5.07367	143.654	5.60117	161.783	3.93933	172.776	5.47333	147.56	26.46	979.909	40.4102	31.2141
2019-01-03 07:30:00	5.07367	143.654	5.60117	161.783	3.93933	172.776	5.47333	147.56	26.46	979.909	40.4102	33.2351
2019-01-03 07:45:00	5.07367	143.654	5.60117	161.783	3.93933	172.776	5.47333	147.56	26.46	979.909	40.4102	32.2856
2019-01-03 08:00:00	5.07367	143.654	5.60117	161.783	3.93933	172.776	5.47333	147.56	26.46	979.909	40.4102	33.4199
2019-01-03 08:15:00	9.03133	151.344	8.797	146.478	8.28567	160.082	8.28567	154.81	26.46	979.612	48.8889	39.6309
2019-01-03 08:30:00	7.49933	139.383	6.496	148.333	7.00733	166.331	6.75167	132.719	26.46	980.652	49.1624	37.3179
2019-01-03 08:45:00	8.52067	133.21	8.03	126.854	6.75167	131.258	8.797	146.805	26.46	980.801	48.095	32.3595
2019-01-03 09:00:00	6.73333	145.436	6.75167	136.687	7.00733	143.972	6.75167	157.029	26.46	981.396	48.2653	30.8667
2019-01-03 09:15:00	8.01	144.337	7.00733	130.487	7.51867	150.414	7.51867	152.147	26.46	981.545	47.4789	24.0497
2019-01-03 09:30:00	7.49933	134.746	6.496	130.61	5.47333	148.828	6.75167	145.07	26.46	981.991	47.3765	18.308
2019-01-03 09:45:00	5.712	125.193	5.729	137.943	6.24033	165.63	6.24033	138.615	26.46	982.34	46.7231	15.9211
2019-01-03 10:00:00	8.26533	145.104	6.496	129.959	5.47333	146.323	8.54133	146.25	26.46	982.285	46.4068	21.068
2019-01-03 10:15:00	8.01	143.068	7.51867	139.732	8.03	149.949	7.51867	144.654	26.46	981.988	48.1121	25.173
2019-01-03 10:30:00	10.0527	138.14	9.564	148.808	10.0753	151.534	10.0753	150.607	26.46	981.69	50.3673	44.8369
2019-01-03 10:45:00	9.542	143.971	8.54133	132.632	10.331	145.899	9.81967	146.704	26.46	981.096	49.2739	54.309
2019-01-03 11:00:00	5.45667	150.046	9.30833	165.3	11.6093	140.945	5.47333	159.121	26.46	981.096	49.547	50.365
2019-01-03 11:15:00	7.75467	138.65	9.05267	134.24	10.0753	143.432	8.797	146.262	26.46	981.06	48.8973	46.8256
2019-01-03 11:30:00	7.75467	140.742	8.54133	148.213	8.797	146.305	7.77433	159.21	26.46	981.094	48.3826	37.9941
2019-01-03 11:45:00	10.308	147.881	10.5867	140.566	10.331	144.831	10.331	154.906	26.46	980.501	49.951	37.9091
2019-01-03 12:00:00	8.776	155.541	8.54133	150.958	5.98467	152.564	8.797	152.979	26.46	980.649	52.5135	36.8967
2019-01-03 12:15:00	4.69067	197.465	4.70633	202.349	4.45067	180.705	4.70633	198.197	26.46	980.649	52.8932	37.7502
2019-01-03 12:30:00	4.18	179.212	4.70633	161.237	5.98467	162.209	4.195	196.485	26.46	980.352	54.1221	39.9671
2019-01-03 12:45:00	7.49933	136.012	7.00733	131.577	7.263	133.206	6.75167	170.24	26.46	980.203	53.4404	38.7885
2019-01-03 13:00:00	9.28667	148.966	9.81967	140.457	9.564	153.748	9.05267	145.77	26.46	979.905	53.5086	37.7946
2019-01-03 13:15:00	9.79733	146.744	9.564	142.577	8.03	135.326	9.81967	151.282	26.46	979.603	51.4578	35.7365
2019-01-03 13:30:00	8.26533	139.794	9.30833	129.504	8.54133	142.112	9.05267	147.918	26.46	979.906	50.2289	33.9002
2019-01-03 13:45:00	5.712	160.325	6.24033	176.942	6.496	184.964	5.47333	167.326	26.46	979.837	48.4145	34.3103
2019-01-03 14:00:00	6.22267	149.859	5.98467	139.444	5.47333	155.322	5.98467	146.2	26.46	980.242	48.0306	31.1365
2019-01-03 14:15:00	6.98867	128.071	7.263	127.047	6.24033	153.705	7.00733	141.144	26.46	979.939	49.9753	28.4429
2019-01-03 14:30:00	9.542	138.122	8.797	124.757	11.3537	140.318	9.30833	160.659	26.46	979.348	49.5663	31.118
2019-01-03 14:45:00	6.478	149.483	7.00733	146.093	7.00733	166.727	5.98467	148.703	26.46	979.974	49.2573	28.8974
2019-01-03 15:00:00	6.98867	139.666	8.54133	146.033	8.03	153.813	6.496	153.155	26.46	979.709	48.9198	26.8283
2019-01-03 15:15:00	6.478	155.724	7.77433	149.043	8.54133	168.579	6.496	155.749	26.46	980.4	48.0342	29.703
2019-01-03 15:30:00	7.75467	154.444	7.77433	147.496	8.28567	157.494	7.51867	157.591	26.46	980.306	48.7898	28.9085
2019-01-03 15:45:00	7.244	147.402	7.00733	144.967	6.75167	158.331	7.00733	151.622	26.46	980.202	50.1591	22.7048
2019-01-03 16:00:00	8.01	143.791	5.98467	141.356	5.47333	143.45	7.77433	153.745	26.46	980.203	49.4074	18.5999
2019-01-03 16:15:00	4.69067	136.741	4.195	129.208	3.93933	192.951	4.962	150.233	26.46	979.9	50.5353	16.5197
2019-01-03 16:30:00	6.73333	145.942	6.75167	135.335	5.21767	141.99	6.75167	151.895	26.46	979.439	51.3907	15.0897
2019-01-03 16:45:00	3.414	122.306	4.45067	115.261	4.195	146.094	4.195	128.186	26.46	979.309	52.2125	15.2412
2019-01-03 17:00:00	2.13733	131.528	2.40533	131.803	2.40533	147.265	1.894	150.388	26.46	979.312	53.1693	11.5168
2019-01-03 17:15:00	4.946	139.363	4.70633	134.367	4.70633	151.22	5.21767	137.752	26.46	979.014	53.6487	9.66941
2019-01-03 17:30:00	4.69067	127.45	4.45067	119.334	4.70633	127.914	4.962	128.646	26.46	978.866	54.2716	9.35535
2019-01-03 17:45:00	4.69067	125.761	4.70633	127.506	5.98467	132.033	5.47333	116.219	26.46	979.05	54.4165	8.65333
2019-01-03 18:00:00	5.712	126.716	4.45067	106.667	4.45067	121.2	5.729	124.056	26.46	979.003	54.5547	8.20995
2019-01-03 18:15:00	2.90333	123.202	4.195	129.219	3.428	155.662	3.17233	131.109	26.46	978.998	55.0333	5.75657
2019-01-03 18:30:00	5.45667	139.944	5.47333	124.484	4.962	128.303	5.729	136.259	26.46	979.165	55.6144	7.90327
2019-01-03 18:45:00	5.45667	136.43	5.21767	130.561	5.21767	129.596	5.47333	139.359	26.46	979.012	56.1955	7.70375
2019-01-03 19:00:00	3.66933	137.772	2.91667	132.44	2.661	137.357	3.68367	152.514	26.46	979.463	56.3664	5.45729
2019-01-03 19:15:00	5.45667	136.454	6.496	136.15	5.98467	138.26	5.729	138.187	26.46	979.017	57.0843	5.08411
2019-01-03 19:30:00	5.712	144.142	4.962	122.141	4.195	134.258	5.47333	150.049	26.46	979.017	57.3577	6.30341
2019-01-03 19:45:00	4.43533	130.377	4.195	128.731	4.70633	136.088	4.45067	146.363	26.46	979.017	57.7679	6.42164
2019-01-03 20:00:00	5.45667	140.408	4.962	134.515	5.21767	143.898	5.21767	145.411	26.46	979.017	58.1097	6.55096
2019-01-03 20:15:00	5.96733	138.284	5.21767	130.194	5.21767	136.575	5.98467	142.189	26.46	979.017	58.1777	4.89198
2019-01-03 20:30:00	6.22267	139.847	5.98467	132.806	5.47333	141.775	5.98467	144.63	26.46	979.017	58.1097	3.88328
2019-01-03 20:45:00	5.96733	139.017	5.729	133.319	5.47333	136.625	5.729	144.655	26.46	979.017	58.4174	4.17518
2019-01-03 21:00:00	5.45667	142.751	4.195	134.173	4.45067	142.092	5.21767	149.219	26.46	979.314	59.2035	4.04216
2019-01-03 21:15:00	4.43533	144.483	4.195	141.031	3.428	146.387	4.45067	148.876	26.46	979.166	59.8186	2.68615
2019-01-03 21:30:00	3.66933	120.053	2.14967	124.947	1.63833	182.899	3.93933	118.003	26.46	979.017	60.0921	1.38187
2019-01-03 21:45:00	3.25746	140.701	2.4312	143.374	1.82628	146.094	3.09396	143.971	26.46	979.166	59.7503	0.96066
2019-01-03 22:00:00	3.25746	140.701	2.4312	143.374	1.82628	146.094	3.09396	143.971	26.46	979.166	59.7503	0.920017
2019-01-03 22:15:00	3.25746	140.701	2.4312	143.374	1.82628	146.094	3.09396	143.971	26.46	979.166	59.7503	0.217996
2019-01-03 22:30:00	3.25746	140.701	2.4312	143.374	1.82628	146.094	3.09396	143.971	26.46	979.166	59.7503	-0.321452
2019-01-03 22:45:00	3.25746	140.701	2.4312	143.374	1.82628	146.094	3.09396	143.971	26.46	979.166	59.7503	-0.328841
2019-01-03 23:00:00	3.25746	140.701	2.4312	143.374	1.82628	146.094	3.09396	143.971	26.46	979.166	59.7503	-0.299282
2019-01-03 23:15:00	3.25746	140.701	2.4312	143.374	1.82628	146.094	3.09396	143.971	26.46	979.166	59.7503	-0.0812866
2019-01-03 23:30:00	3.25746	140.701	2.4312	143.374	1.82628	146.094	3.09396	143.971	26.46	979.166	59.7503	-0.0406433
2019-01-03 23:45:00	3.25746	140.701	2.4312	143.374	1.82628	146.094	3.09396	143.971	26.46	979.166	59.7503	-0.280808
2019-01-04	3.25746	140.701	2.4312	143.374	1.82628	146.094	3.09396	143.971	26.46	979.166	59.7503	-0.214301
2019-01-04 00:15:00	3.25746	140.701	2.4312	143.374	1.82628	146.094	3.09396	143.971	26.46	979.166	59.7503	-0.269724
2019-01-04 00:30:00	3.25746	140.701	2.4312	143.374	1.82628	146.094	3.09396	143.971	26.46	979.166	59.7503	-0.306672
2019-01-04 00:45:00	3.25746	140.701	2.4312	143.374	1.82628	146.094	3.09396	143.971	26.46	979.166	59.7503	-0.306672
2019-01-04 01:00:00	3.25746	140.701	2.4312	143.374	1.82628	146.094	3.09396	143.971	26.46	979.166	59.7503	-0.317757
2019-01-04 01:15:00	3.25746	140.701	2.4312	143.374	1.82628	146.094	3.09396	143.971	26.46	979.166	59.7503	-0.306672
2019-01-04 01:30:00	3.25746	140.701	2.4312	143.374	1.82628	146.094	3.09396	143.971	26.46	979.166	59.7503	-0.288198
2019-01-04 01:45:00	3.25746	140.701	2.4312	143.374	1.82628	146.094	3.09396	143.971	26.46	979.166	59.7503	-0.288198
2019-01-04 02:00:00	3.25746	140.701	2.4312	143.374	1.82628	146.094	3.09396	143.971	26.46	979.166	59.7503	-0.288198
2019-01-04 02:15:00	3.25746	140.701	2.4312	143.374	1.82628	146.094	3.09396	143.971	26.46	979.166	59.7503	-0.288198
2019-01-04 02:30:00	3.25746	140.701	2.4312	143.374	1.82628	146.094	3.09396	143.971	26.46	979.166	59.7503	-0.288198
2019-01-04 02:45:00	3.25746	140.701	2.4312	143.374	1.82628	146.094	3.09396	143.971	26.46	979.166	59.7503	-0.299282
2019-01-04 03:00:00	3.25746	140.701	2.4312	143.374	1.82628	146.094	3.09396	143.971	26.46	979.166	59.7503	0.35101
2019-01-04 03:15:00	3.25746	140.701	2.4312	143.374	1.82628	146.094	3.09396	143.971	26.46	979.166	59.7503	0.317757
2019-01-04 03:30:00	3.25746	140.701	2.4312	143.374	1.82628	146.094	3.09396	143.971	26.46	979.166	59.7503	-0.0886763
2019-01-04 03:45:00	3.25746	140.701	2.4312	143.374	1.82628	146.094	3.09396	143.971	26.46	979.166	59.7503	-0.258639
2019-01-04 04:00:00	3.25746	140.701	2.4312	143.374	1.82628	146.094	3.09396	143.971	26.46	979.166	59.7503	-0.306672
2019-01-04 04:15:00	3.25746	140.701	2.4312	143.374	1.82628	146.094	3.09396	143.971	26.46	979.166	59.7503	-0.288198
2019-01-04 04:30:00	3.25746	140.701	2.4312	143.374	1.82628	146.094	3.09396	143.971	26.46	979.166	59.7503	-0.288198
2019-01-04 04:45:00	3.25746	140.701	2.4312	143.374	1.82628	146.094	3.09396	143.971	26.46	979.166	59.7503	-0.306672
2019-01-04 05:00:00	3.25746	140.701	2.4312	143.374	1.82628	146.094	3.09396	143.971	26.46	979.166	59.7503	-0.336231
2019-01-04 05:15:00	3.25746	140.701	2.4312	143.374	1.82628	146.094	3.09396	143.971	26.46	979.166	59.7503	-0.35101
2019-01-04 05:30:00	3.25746	140.701	2.4312	143.374	1.82628	146.094	3.09396	143.971	26.46	979.166	59.7503	-0.321452
2019-01-04 05:45:00	3.25746	140.701	2.4312	143.374	1.82628	146.094	3.09396	143.971	26.46	979.166	59.7503	-0.369485
2019-01-04 06:00:00	3.25746	140.701	2.4312	143.374	1.82628	146.094	3.09396	143.971	26.46	979.166	59.7503	-0.158878
2019-01-04 06:15:00	3.25746	140.701	2.4312	143.374	1.82628	146.094	3.09396	143.971	26.46	979.166	59.7503	0.0849814
2019-01-04 06:30:00	3.25746	140.701	2.4312	143.374	1.82628	146.094	3.09396	143.971	26.46	979.166	59.7503	-0.0591175
2019-01-04 06:45:00	3.25746	140.701	2.4312	143.374	1.82628	146.094	3.09396	143.971	26.46	979.166	59.7503	0.0147794
2019-01-04 07:00:00	3.25746	140.701	2.4312	143.374	1.82628	146.094	3.09396	143.971	26.46	979.166	59.7503	0.317757
2019-01-04 07:15:00	3.25746	140.701	2.4312	143.374	1.82628	146.094	3.09396	143.971	26.46	979.166	59.7503	1.7218
2019-01-04 07:30:00	3.25746	140.701	2.4312	143.374	1.82628	146.094	3.09396	143.971	26.46	979.166	59.7503	3.68746
2019-01-04 07:45:00	3.25746	140.701	2.4312	143.374	1.82628	146.094	3.09396	143.971	26.46	979.166	59.7503	3.18865
2019-01-04 08:00:00	3.25746	140.701	2.4312	143.374	1.82628	146.094	3.09396	143.971	26.46	979.166	59.7503	2.579
2019-01-04 08:15:00	3.25746	140.701	2.4312	143.374	1.82628	146.094	3.09396	143.971	26.46	979.166	59.7503	1.16757
2019-01-04 08:30:00	3.25746	140.701	2.4312	143.374	1.82628	146.094	3.09396	143.971	26.46	979.166	59.7503	0.0738969
2019-01-04 08:45:00	3.25746	140.701	2.4312	143.374	1.82628	146.094	3.09396	143.971	26.46	979.166	59.7503	-0.24386
2019-01-04 09:00:00	4.18	145.522	3.17233	137.531	1.894	145.718	3.8115	150.013	26.46	979.314	59.6876	-0.225386
2019-01-04 09:15:00	4.43533	14.7657	2.14967	3.77154	1.894	8.29807	3.93933	22.6	26.46	979.612	89.0105	-0.203216
2019-01-04 09:30:00	3.92467	0.0976244	2.40533	0.59874	1.38267	31.3862	3.428	19.6225	26.46	980.206	89.9334	-0.280808
2019-01-04 09:45:00	3.414	7.02895	2.14967	13.5096	0.375667	344.272	3.17233	348.299	26.46	980.058	94.1378	-0.144099
2019-01-04 10:00:00	2.39267	9.03025	2.40533	1.77023	2.14967	17.5236	2.40533	356.427	26.46	980.206	94.0011	7.45058e-09
2019-01-04 10:15:00	4.946	348.515	4.45067	334.031	3.428	343.683	4.45067	355.154	26.46	980.504	91.5731	0.857204
2019-01-04 10:30:00	5.45667	3.51444	5.21767	1.06224	4.962	15.5221	4.962	5.22285	26.46	980.206	87.0953	1.9324
2019-01-04 10:45:00	4.18	356.912	4.70633	15.9486	3.93933	356.985	3.68367	0.195247	26.46	979.76	89.83	1.70332
2019-01-04 11:00:00	5.45667	7.71231	4.962	3.52741	4.70633	17.4259	5.21767	8.98142	26.46	979.612	85.3869	1.59617
2019-01-04 11:15:00	4.69067	355.274	3.93933	7.21141	2.661	10.3968	4.45067	353.565	26.46	979.612	84.7021	0.942186
2019-01-04 11:30:00	3.66933	10.6166	3.17233	2.01273	3.17233	352.253	3.428	339.977	26.46	979.909	84.3958	0.635513
2019-01-04 11:45:00	3.66933	312.763	1.38267	331.617	0.631333	339.341	2.91667	337.486	26.46	980.206	80.5672	1.0013
2019-01-04 12:00:00	3.92467	12.203	1.38267	17.8523	0.375667	11.9101	2.91667	15.4246	26.46	980.136	80.533	1.60356
2019-01-04 12:15:00	2.90333	22.7419	2.40533	31.4133	0.375667	336.834	2.661	23.3763	26.46	979.91	82.0891	1.26364
2019-01-04 12:30:00	3.66933	20.8601	3.93933	17.7678	1.894	64.8981	2.91667	17.42	26.46	979.609	81.1209	0.956965
2019-01-04 12:45:00	3.414	16.3709	1.38267	8.39898	1.38267	37.6213	2.91667	36.1331	26.46	979.907	77.2937	1.06042
2019-01-04 13:00:00	3.414	352.57	1.127	61.1897	0	15.3206	2.661	30.5681	26.46	979.907	71.9577	1.06412
2019-01-04 13:15:00	2.648	356.47	3.428	1.85855	0.751333	347.492	1.894	355.348	26.46	979.758	66.0802	1.0013
2019-01-04 13:30:00	3.92467	3.51296	3.428	25.6197	3.68367	335.219	3.68367	356.834	26.46	979.311	61.433	1.5038
2019-01-04 13:45:00	3.414	328.835	3.428	317.324	2.661	332.982	2.40533	345.521	26.46	979.299	58.7649	1.53336
2019-01-04 14:00:00	2.90333	354.307	2.91667	10.7301	2.14967	2.04914	2.40533	350.453	26.46	978.979	53.2308	3.85372
2019-01-04 14:15:00	2.39267	0.0975816	3.68367	38.3294	3.428	341.365	2.40533	355.782	26.46	978.714	54.0525	6.35513
2019-01-04 14:30:00	1.882	318.71	0.751333	12.5836	2.40533	321.272	1.007	31.8857	26.46	978.717	52.1406	7.7407
2019-01-04 14:45:00	3.414	22.1999	3.68367	20.1549	0.751333	26.9082	3.68367	28.8598	26.46	978.866	50.8068	8.11758
2019-01-04 15:00:00	5.96733	346.02	5.729	333.924	4.45067	339.653	5.98467	347.411	26.46	979.014	49.2686	13.368
2019-01-04 15:15:00	5.20133	356.899	4.70633	14.958	4.195	20.9553	4.45067	347.604	26.46	978.711	48.0041	15.4777
2019-01-04 15:30:00	6.478	354.021	6.75167	34.7668	4.962	356.948	5.98467	354.143	26.46	978.716	47.8675	18.8474
2019-01-04 15:45:00	4.69067	72.6549	4.195	2.83578	4.962	7.46554	4.45067	356.809	26.46	978.551	46.3	17.3584
2019-01-04 16:00:00	6.22267	349.107	5.729	10.2165	5.21767	355.207	5.729	355.329	26.46	978.413	45.1734	19.9891
2019-01-04 16:15:00	7.49933	0.097591	5.98467	1.27483	7.00733	20.2501	6.24033	349.62	26.46	977.677	44.2166	21.7035
2019-01-04 16:30:00	5.96733	356.768	5.98467	3.7755	7.77433	12.882	7.77433	356.793	26.46	977.528	43.7041	21.0569
2019-01-04 16:45:00	5.96733	352.537	6.496	1.08971	4.962	9.05254	6.24033	356.343	26.46	977.528	43.743	17.6614
2019-01-04 17:00:00	6.478	350.326	5.47333	16.3393	6.496	16.0582	7.263	1.97676	26.46	977.389	43.6136	21.7331
2019-01-04 17:15:00	7.244	356.914	5.729	0.989227	5.729	16.6694	6.496	2.92873	26.46	977.672	42.3859	21.6592
2019-01-04 17:30:00	9.542	2.00128	7.263	7.4066	7.00733	2.78226	9.05267	5.63774	26.46	977.53	40.1978	22.4573
2019-01-04 17:45:00	7.49933	5.85742	7.51867	8.38278	6.496	13.5941	8.03	10.4457	26.46	977.53	38.9674	20.5988
2019-01-04 18:00:00	7.75467	0.56134	6.75167	2.40322	5.729	4.17344	8.28567	1.87927	26.46	977.827	38.2157	19.1873
2019-01-04 18:15:00	7.49933	4.10022	7.51867	4.25808	5.729	0.0488122	7.77433	3.83175	26.46	977.827	37.4637	19.9411
2019-01-04 18:30:00	6.73333	14.6436	6.24033	7.6765	2.661	355.645	5.98467	18.3778	26.46	977.827	37.4295	16.1354
2019-01-04 18:45:00	8.52067	11.3244	7.77433	5.77282	4.962	17.7676	8.797	17.792	26.46	977.827	36.8484	16.7413
2019-01-04 19:00:00	7.244	14.7413	5.21767	2.13475	4.195	2.63586	6.75167	18.4266	26.46	977.827	36.1648	18.5075
2019-01-04 19:15:00	6.98867	17.7676	5.98467	11.6303	4.70633	11.959	6.496	13.765	26.46	977.827	37.2586	14.9752
2019-01-04 19:30:00	6.22267	14.9856	5.21767	10.3129	3.93933	2.92878	5.47333	16.5232	26.46	977.827	37.8062	12.4332
2019-01-04 19:45:00	4.43533	21.9676	4.45067	10.5594	3.93933	17.4521	4.45067	33.4884	26.46	977.827	37.8092	10.8
2019-01-04 20:00:00	5.45667	18.5514	3.93933	5.50817	1.894	355.113	4.45067	23.6042	26.46	977.53	37.5377	11.4614
2019-01-04 20:15:00	5.45667	9.7641	4.45067	9.48759	3.17233	14.1091	4.962	19.6258	26.46	977.827	38.2222	11.0587
2019-01-04 20:30:00	4.946	22.5307	4.70633	13.1003	2.14967	22.9212	4.70633	33.6861	26.46	977.678	39.7265	11.5242
2019-01-04 20:45:00	5.96733	26.1434	5.47333	11.831	4.962	7.17661	5.729	32.5633	26.46	977.53	40.6838	15.5442
2019-01-04 21:00:00	6.22267	21.1393	5.47333	11.001	4.70633	28.8529	5.729	31.1475	26.46	977.53	41.1624	13.0724
2019-01-04 21:15:00	7.244	21.6763	7.00733	15.0531	5.21767	12.2051	7.00733	28.8529	26.46	977.53	42.188	14.0663
2019-01-04 21:30:00	6.22267	23.0921	6.24033	13.2956	4.962	23.8	5.729	30.1711	26.46	977.53	44.5812	14.6944
2019-01-04 21:45:00	6.98867	25.0937	6.24033	19.4714	3.428	13.1083	7.00733	29.8782	26.46	977.53	48.547	14.4616
2019-01-04 22:00:00	6.478	21.4078	6.75167	11.8066	3.68367	4.22297	6.496	29.7561	26.46	977.53	48.9573	14.6242
2019-01-04 22:15:00	5.96733	18.0148	5.47333	12.2948	4.962	16.2572	5.98467	25.6308	26.46	977.53	48.4786	13.4123
2019-01-04 22:30:00	7.244	25.4843	6.24033	20.2281	3.428	24.9229	6.75167	28.4379	26.46	977.232	46.1538	14.3064
2019-01-04 22:45:00	7.244	20.5046	6.496	21.3754	4.195	27.73	5.98467	35.0775	26.46	977.232	44.9231	15.7327
2019-01-04 23:00:00	7.75467	25.7528	7.51867	14.0035	4.70633	22.97	7.51867	27.071	26.46	976.935	42.5983	15.2893
2019-01-04 23:15:00	7.49933	22.1157	7.00733	15.5901	3.68367	16.6478	7.51867	30.0734	26.46	977.232	38.906	11.9196
2019-01-04 23:30:00	7.49933	14.7682	7.51867	7.65683	5.729	14.7438	8.03	20.5779	26.46	977.381	37.9829	11.2878
2019-01-04 23:45:00	7.49933	14.7682	7.51867	7.65683	5.729	14.7438	8.03	20.5779	26.46	977.381	37.9829	9.1743
2019-01-05	7.49933	14.7682	7.51867	7.65683	5.729	14.7438	8.03	20.5779	26.46	977.381	37.9829	10.6448
2019-01-05 00:15:00	7.49933	14.7682	7.51867	7.65683	5.729	14.7438	8.03	20.5779	26.46	977.381	37.9829	8.45011
2019-01-05 00:30:00	7.49933	14.7682	7.51867	7.65683	5.729	14.7438	8.03	20.5779	26.46	977.381	37.9829	9.15213
2019-01-05 00:45:00	7.49933	14.7682	7.51867	7.65683	5.729	14.7438	8.03	20.5779	26.46	977.381	37.9829	8.10649
2019-01-05 01:00:00	7.49933	14.7682	7.51867	7.65683	5.729	14.7438	8.03	20.5779	26.46	977.381	37.9829	8.30232
2019-01-05 01:15:00	7.49933	14.7682	7.51867	7.65683	5.729	14.7438	8.03	20.5779	26.46	977.381	37.9829	10.2532
2019-01-05 01:30:00	7.49933	14.7682	7.51867	7.65683	5.729	14.7438	8.03	20.5779	26.46	977.381	37.9829	13.8889
2019-01-05 01:45:00	7.49933	14.7682	7.51867	7.65683	5.729	14.7438	8.03	20.5779	26.46	977.381	37.9829	18.574
2019-01-05 02:00:00	7.49933	14.7682	7.51867	7.65683	5.729	14.7438	8.03	20.5779	26.46	977.381	37.9829	17.9865
2019-01-05 02:15:00	7.49933	14.7682	7.51867	7.65683	5.729	14.7438	8.03	20.5779	26.46	977.381	37.9829	22.121
2019-01-05 02:30:00	7.49933	14.7682	7.51867	7.65683	5.729	14.7438	8.03	20.5779	26.46	977.381	37.9829	21.1715
2019-01-05 02:45:00	7.49933	14.7682	7.51867	7.65683	5.729	14.7438	8.03	20.5779	26.46	977.381	37.9829	30.3679
2019-01-05 03:00:00	7.49933	14.7682	7.51867	7.65683	5.729	14.7438	8.03	20.5779	26.46	977.381	37.9829	33.8965
2019-01-05 03:15:00	7.49933	14.7682	7.51867	7.65683	5.729	14.7438	8.03	20.5779	26.46	977.381	37.9829	30.7485
2019-01-05 03:30:00	7.49933	14.7682	7.51867	7.65683	5.729	14.7438	8.03	20.5779	26.46	977.381	37.9829	29.7213
2019-01-05 03:45:00	7.49933	14.7682	7.51867	7.65683	5.729	14.7438	8.03	20.5779	26.46	977.381	37.9829	30.7633
2019-01-05 04:00:00	7.49933	14.7682	7.51867	7.65683	5.729	14.7438	8.03	20.5779	26.46	977.381	37.9829	33.6083
2019-01-05 04:15:00	7.49933	14.7682	7.51867	7.65683	5.729	14.7438	8.03	20.5779	26.46	977.381	37.9829	31.7646
2019-01-05 04:30:00	7.49933	14.7682	7.51867	7.65683	5.729	14.7438	8.03	20.5779	26.46	977.381	37.9829	19.4423
2019-01-05 04:45:00	7.49933	14.7682	7.51867	7.65683	5.729	14.7438	8.03	20.5779	26.46	977.381	37.9829	15.4075
2019-01-05 05:00:00	7.49933	14.7682	7.51867	7.65683	5.729	14.7438	8.03	20.5779	26.46	977.381	37.9829	18.8511
2019-01-05 05:15:00	7.49933	14.7682	7.51867	7.65683	5.729	14.7438	8.03	20.5779	26.46	977.381	37.9829	15.9026
2019-01-05 05:30:00	7.49933	14.7682	7.51867	7.65683	5.729	14.7438	8.03	20.5779	26.46	977.381	37.9829	16.1576
2019-01-05 05:45:00	7.49933	14.7682	7.51867	7.65683	5.729	14.7438	8.03	20.5779	26.46	977.381	37.9829	17.1884
2019-01-05 06:00:00	7.49933	14.7682	7.51867	7.65683	5.729	14.7438	8.03	20.5779	26.46	977.381	37.9829	16.0541
2019-01-05 06:15:00	7.49933	14.7682	7.51867	7.65683	5.729	14.7438	8.03	20.5779	26.46	977.381	37.9829	14.6464
2019-01-05 06:30:00	7.49933	14.7682	7.51867	7.65683	5.729	14.7438	8.03	20.5779	26.46	977.381	37.9829	17.5616
2019-01-05 06:45:00	7.49933	14.7682	7.51867	7.65683	5.729	14.7438	8.03	20.5779	26.46	977.381	37.9829	25.5794
2019-01-05 07:00:00	7.49933	14.7682	7.51867	7.65683	5.729	14.7438	8.03	20.5779	26.46	977.381	37.9829	29.5735
2019-01-05 07:15:00	7.49933	14.7682	7.51867	7.65683	5.729	14.7438	8.03	20.5779	26.46	977.381	37.9829	26.5105
2019-01-05 07:30:00	7.49933	14.7682	7.51867	7.65683	5.729	14.7438	8.03	20.5779	26.46	977.381	37.9829	17.3695
2019-01-05 07:45:00	8.26533	10.0605	7.00733	4.66279	3.17233	341.983	8.28567	17.1663	26.46	976.046	30.7114	14.7905
2019-01-05 08:00:00	6.98867	18.7535	5.98467	13.5023	4.45067	343.081	6.24033	23.0512	26.46	976.641	37.7565	11.018
2019-01-05 08:15:00	6.478	17.1419	5.98467	7.44651	4.962	343.667	5.98467	21.8791	26.46	977.236	39.3297	6.60638
2019-01-05 08:30:00	5.20133	9.03442	4.195	2.95231	3.17233	343.21	4.45067	17.1654	26.46	977.693	34.8819	2.98174
2019-01-05 08:45:00	2.13733	335.008	2.14967	4.08326	3.17233	342.259	3.17233	1.95297	26.46	978.14	39.798	2.17257
2019-01-05 09:00:00	3.66933	9.66647	2.14967	17.2989	1.63833	343.013	2.661	0.244103	26.46	978.869	42.8376	3.17018
2019-01-05 09:15:00	4.43533	19.2322	4.195	7.43276	2.661	344.179	3.68367	7.71241	26.46	979.017	42.489	4.14931
2019-01-05 09:30:00	4.69067	1.78164	4.195	14.022	2.40533	345.004	3.68367	16.2544	26.46	979.166	38.3865	2.7268
2019-01-05 09:45:00	2.13733	22.4533	2.40533	12.3132	1.894	344.804	2.40533	0.97623	26.46	979.588	39.4457	1.09737
2019-01-05 10:00:00	2.13733	340.499	2.91667	0.505981	2.40533	344.89	1.894	338.791	26.46	979.908	34.3759	1.55183
2019-01-05 10:15:00	2.90333	21.7859	5.21767	13.0083	3.428	338.133	2.14967	22.8838	26.46	980.175	34.4419	3.71701
2019-01-05 10:30:00	5.20133	30.1536	4.195	10.9831	2.40533	346.498	4.70633	15.8331	26.46	979.906	33.109	3.05933
2019-01-05 10:45:00	2.648	19.1258	3.17233	25.4725	2.661	336.945	2.40533	341.873	26.46	979.906	31.2968	3.71332
2019-01-05 11:00:00	3.66933	3.75621	4.195	9.56184	3.93933	339.522	2.661	2.26836	26.46	979.635	28.6952	5.95609
2019-01-05 11:15:00	5.20133	35.9256	4.962	27.6082	4.45067	341.964	5.21767	36.0232	26.46	979.014	27.6345	8.76417
2019-01-05 11:30:00	5.20133	29.2673	2.91667	37.3151	0	278.942	5.729	27.4869	26.46	979.309	29.24	12.3297
2019-01-05 11:45:00	4.18	19.9505	5.47333	22.9254	3.68367	286.381	3.93933	13.2435	26.46	979.012	29.8548	13.1721
2019-01-05 12:00:00	4.69067	0.0975577	5.47333	12.3417	4.70633	287.161	4.70633	9.17042	26.46	978.715	29.5132	13.5047
2019-01-05 12:15:00	5.96733	356.915	3.68367	7.90149	6.496	287.6	5.729	327.623	26.46	978.418	29.3766	17.1219
2019-01-05 12:30:00	2.13733	36.0963	6.24033	32.3397	1.63833	287.063	2.14967	352.086	26.46	977.972	28.1127	12.0119
2019-01-05 12:45:00	3.92467	16.7311	3.17233	14.7305	3.93933	287.356	3.428	13.1459	26.46	978.121	27.088	11.1621
2019-01-05 13:00:00	3.92467	356.939	2.40533	1.14698	2.14967	286.99	4.70633	347.159	26.46	978.418	25.5508	13.4677
2019-01-05 13:15:00	2.90333	28.0234	6.496	1.53721	4.195	287.307	3.68367	1.51214	26.46	978.121	25.1068	13.9296
2019-01-05 13:30:00	4.946	23.1943	4.70633	31.5592	6.24033	288.234	3.93933	342.72	26.46	977.972	24.731	12.9024
2019-01-05 13:45:00	5.20133	349.086	5.729	336.793	4.70633	288.039	5.47333	347.013	26.46	978.269	23.5354	13.1795
2019-01-05 14:00:00	4.18	26.0967	4.195	4.14552	2.40533	288.429	4.195	11.9996	26.46	978.418	23.5013	8.76048
2019-01-05 14:15:00	3.92467	6.80465	2.14967	13.2685	3.93933	328.306	5.21767	11.5118	26.46	978.418	23.0914	9.51053
2019-01-05 14:30:00	2.13733	21.2676	4.70633	36.8517	4.45067	329.306	2.91667	13.2922	26.46	978.121	23.3647	10.1608
2019-01-05 14:45:00	4.18	2.73161	4.195	12.5355	4.70633	329.33	3.68367	0.195115	26.46	977.972	22.8181	10.7335
2019-01-05 15:00:00	5.20133	343.305	4.195	0.462721	4.45067	329.403	5.21767	12.7313	26.46	977.823	23.0231	10.8776
2019-01-05 15:15:00	3.66933	349.156	3.68367	1.14696	4.70633	329.058	3.93933	355.035	26.46	977.29	22.8195	9.3923
2019-01-05 15:30:00	2.90333	84.4336	3.428	22.6925	3.68367	329.318	2.661	339.052	26.46	977.23	23.0973	10.2717
2019-01-05 15:45:00	3.414	348.838	2.40533	7.99634	4.45067	332.174	2.91667	337.2	26.46	977.527	22.4158	10.4712
2019-01-05 16:00:00	5.96733	355.939	5.21767	0.384216	4.962	332.273	5.729	91.4915	26.46	977.231	22.4159	13.0761
2019-01-05 16:15:00	5.20133	344.207	3.17233	7.89687	5.729	332.885	5.21767	0.195212	26.46	976.785	21.8041	10.4195
2019-01-05 16:30:00	6.22267	10.1285	5.98467	5.67507	4.70633	332.922	5.98467	12.447	26.46	976.875	21.8765	5.74179
2019-01-05 16:45:00	5.45667	13.5453	5.21767	9.1162	3.93933	332.481	5.21767	9.66472	26.46	976.935	22.0815	5.34275
2019-01-05 17:00:00	5.20133	85.8358	3.93933	2.67176	4.70633	332.653	3.68367	5.78422	26.46	976.638	21.8765	8.42425
2019-01-05 17:15:00	5.20133	12.8376	5.47333	4.40606	3.68367	332.362	4.70633	10.3482	26.46	976.638	22.2184	6.74679
2019-01-05 17:30:00	5.20133	12.3495	4.45067	1.57498	3.93933	332.606	4.70633	9.71362	26.46	976.638	22.2184	5.57922
2019-01-05 17:45:00	4.946	9.56718	5.21767	2.0631	4.195	332.704	4.70633	13.5698	26.46	976.638	22.4235	6.34035
2019-01-05 18:00:00	4.18	19.9154	4.195	8.84799	3.68367	332.411	3.93933	22.1851	26.46	976.638	22.6286	3.584
2019-01-05 18:15:00	4.18	17.4748	3.68367	14.9007	2.91667	332.264	3.68367	22.8685	26.46	976.638	22.697	1.58139
2019-01-05 18:30:00	3.414	17.4748	3.428	7.87174	2.91667	332.411	3.17233	22.6488	26.46	976.638	22.5602	1.41513
2019-01-05 18:45:00	3.66933	34.3149	3.17233	16.8044	3.17233	332.313	3.428	40.5629	26.46	976.638	22.7653	0.679852
2019-01-05 19:00:00	3.15867	34.2661	3.17233	28.5193	2.91667	332.216	2.91667	44.3214	26.46	976.935	22.8337	0.332536
2019-01-05 19:15:00	2.90333	34.9495	2.40533	25.7858	1.63833	332.02	2.40533	45.1512	26.46	977.232	22.697	-0.402738
2019-01-05 19:30:00	3.15867	47.7383	2.91667	36.6221	2.40533	332.118	2.661	53.3273	26.46	977.232	23.7224	-0.284503
2019-01-05 19:45:00	3.66933	59.9413	3.17233	48.9228	2.661	332.313	3.17233	69.899	26.46	977.232	24.1326	-0.325146
2019-01-05 20:00:00	4.18	76.6839	4.195	67.5202	2.661	332.313	3.93933	89.9364	26.46	977.232	24.7479	-0.210606
2019-01-05 20:15:00	3.66933	128.815	2.661	104.276	2.91667	332.655	3.17233	115.343	26.46	977.232	25.7392	1.005
2019-01-05 20:30:00	4.43533	131.354	4.45067	116.332	4.45067	333.094	3.93933	133.062	26.46	977.53	40.8135	0.993913
2019-01-05 20:45:00	4.43533	125.789	4.45067	119.163	4.962	143.752	4.45067	123.836	26.46	977.232	41.087	4.89567
2019-01-05 21:00:00	6.98867	119.175	6.496	115.332	6.496	132.793	7.00733	124.764	26.46	977.53	43.2747	9.63616
2019-01-05 21:15:00	5.20133	140.457	5.47333	129.902	4.195	136.625	5.729	141.726	26.46	977.827	45.1889	6.11127
2019-01-05 21:30:00	4.18	137.309	4.195	130.659	3.68367	141.433	4.195	140.628	26.46	977.827	40.5401	6.29971
2019-01-05 21:45:00	4.43533	141.58	4.45067	124.557	3.68367	131.695	4.195	138.236	26.46	977.53	42.7277	11.3173
2019-01-05 22:00:00	3.414	131.134	3.428	100.468	2.661	108.119	3.428	144.264	26.46	977.53	45.8725	9.85415
2019-01-05 22:15:00	4.43533	105.922	3.93933	104.886	2.14967	129.67	4.195	136.601	26.46	977.827	46.6245	5.56074
2019-01-05 22:30:00	4.18	133.574	3.93933	131.855	2.91667	129.572	3.93933	147.022	26.46	978.125	47.5474	6.80221
2019-01-05 22:45:00	3.92467	106.663	4.195	105.701	4.45067	112.667	4.195	121.723	26.46	977.827	51.7558	8.08063
2019-01-05 23:00:00	3.92467	107.013	3.17233	114.89	3.17233	144.263	4.195	113.922	26.46	977.678	52.2729	3.31058
2019-01-05 23:15:00	4.43533	124.932	5.47333	113.451	3.68367	142.995	4.70633	127.836	26.46	977.976	51.8291	1.47055
2019-01-05 23:30:00	4.946	124.151	3.93933	118.016	3.68367	111.262	4.962	122.588	26.46	977.827	52.3761	1.19344
2019-01-05 23:45:00	3.66933	122.002	3.17233	110.4	2.40533	120.733	3.428	116.217	26.46	977.53	53.5385	0.679852
2019-01-06	2.39267	123.174	3.17233	104.37	2.661	104.744	2.91667	128.471	26.46	977.232	53.9487	0.0628124
2019-01-06 00:15:00	0	112.238	0	113.451	0	148.756	0	117.828	26.46	977.232	55.7949	0.0184742
2019-01-06 00:30:00	3.66933	136.453	3.68367	131.49	2.661	134.232	4.195	145.827	26.46	976.786	55.1111	0.22908
2019-01-06 00:45:00	3.66933	134.012	3.428	130.294	3.428	136.356	3.93933	149.635	26.46	976.935	55.2479	1.48533
2019-01-06 01:00:00	3.15867	137.259	3.68367	128.17	2.40533	137.332	3.17233	149.415	26.46	977.236	55.6923	1.1491
2019-01-06 01:15:00	1.882	125.518	2.40533	108.74	2.40533	106.429	1.894	130.302	26.46	976.936	52.1709	1.39665
2019-01-06 01:30:00	2.39267	134.696	2.661	125.241	2.40533	123.418	2.40533	138.211	26.46	976.936	52.3761	1.93979
2019-01-06 01:45:00	2.39267	137.234	2.661	124.85	2.14967	126.299	2.40533	143.679	26.46	976.806	50.5299	3.82786
2019-01-06 02:00:00	2.90333	136.624	1.894	121.628	0.375667	98.178	3.17233	145.387	26.46	977.233	52.5128	6.55466
2019-01-06 02:15:00	4.69067	131.181	3.68367	128.073	3.68367	129.326	4.70633	137.967	26.46	976.96	52.8547	8.92675
2019-01-06 02:30:00	4.43533	125.908	4.195	120.75	2.91667	127.348	4.70633	130.79	26.46	976.951	53.5726	8.29493
2019-01-06 02:45:00	3.15867	117.462	3.428	115.452	2.40533	124.907	3.68367	129.57	26.46	976.638	51.5555	8.63855
2019-01-06 03:00:00	4.43533	129.838	3.93933	124.655	3.68367	145.729	4.45067	136.429	26.46	976.341	54.8718	10.9996
2019-01-06 03:15:00	5.20133	141.531	5.21767	134.566	5.47333	141.238	4.962	139.138	26.46	976.192	59.0769	16.4605
2019-01-06 03:30:00	4.946	143.361	4.70633	128.561	3.68367	151.954	4.70633	153.736	26.46	976.341	62.2222	16.5862
2019-01-06 03:45:00	6.22267	137.454	5.47333	130.904	4.962	149.44	6.75167	144.924	26.46	976.341	66.0171	17.0887
2019-01-06 04:00:00	6.478	135.623	5.47333	130.489	5.47333	140.31	6.24033	135.916	26.46	976.044	66.4615	17.1441
2019-01-06 04:15:00	5.45667	140.359	4.70633	130.099	3.68367	138.406	5.21767	142.019	26.46	976.048	67.8632	13.9443
2019-01-06 04:30:00	5.96733	135.039	5.729	132.078	4.195	157.351	6.496	140.263	26.46	975.901	69.5735	12.4295
2019-01-06 04:45:00	5.45667	139.644	5.729	130.386	4.45067	143.013	5.729	144.331	26.46	975.75	69.2392	8.08802
2019-01-06 05:00:00	4.43533	143.503	4.45067	136.931	3.17233	137.205	4.45067	145.261	26.46	976.066	66.8127	6.8835
2019-01-06 05:15:00	4.69067	142.873	3.93933	152.903	1.894	130.812	4.70633	145.534	26.46	976.046	66.1993	8.82329
2019-01-06 05:30:00	4.18	130.031	3.428	122.629	2.661	142.067	4.70633	139.821	26.46	976.109	67.3617	8.45381
2019-01-06 05:45:00	4.946	147.609	5.47333	139.231	2.661	132.765	5.21767	154.201	26.46	976.353	66.4044	9.96869
2019-01-06 06:00:00	5.712	144.631	7.51867	137.302	4.45067	144.826	5.729	165.432	26.46	976.523	72.2516	10.449
2019-01-06 06:15:00	6.22267	139.893	5.729	139.107	5.729	140.967	6.75167	155.811	26.46	976.664	71.3958	11.0217
2019-01-06 06:30:00	5.712	140.772	6.496	131.222	5.98467	134.254	6.24033	152.003	26.46	976.379	70.3704	9.62877
2019-01-06 06:45:00	5.45667	139.037	5.98467	128.705	4.45067	141.014	4.962	153.49	26.46	976.416	70.2667	9.57334
2019-01-06 07:00:00	6.478	146.995	6.75167	133.66	5.98467	138.523	6.496	155.711	26.46	976.349	72.5915	13.2017
2019-01-06 07:15:00	7.244	142.335	6.75167	131.905	4.70633	138.77	7.51867	151.271	26.46	976.533	75.2943	17.6946
2019-01-06 07:30:00	7.244	148.805	5.98467	131.613	4.45067	159.938	7.00733	150.514	26.46	976.535	79.7399	19.7379
2019-01-06 07:45:00	7.244	141.068	7.51867	138.158	5.21767	173.002	7.263	140.775	26.46	976.65	80.3563	24.6188
2019-01-06 08:00:00	5.20133	135.797	5.98467	141.872	6.496	159.577	5.98467	148.737	26.46	976.541	82.7174	19.0248
2019-01-06 08:15:00	5.96733	133.499	4.45067	142.894	3.68367	152.42	5.729	146.951	26.46	976.78	82.4075	20.632
2019-01-06 08:30:00	4.946	134.811	5.21767	127.506	3.68367	150.485	4.962	128.512	26.46	976.643	79.6686	19.228
2019-01-06 08:45:00	5.45667	134.55	5.47333	123.533	5.47333	136.258	5.47333	145.608	26.46	976.945	75.0087	17.4434
2019-01-06 09:00:00	4.69067	132.06	4.962	129.342	4.70633	144.069	4.962	140.164	26.46	977.233	65.094	14.3471
2019-01-06 09:15:00	4.18	144.147	4.45067	135.472	4.195	133.627	3.428	150.371	26.46	978.125	60.8462	12.193
2019-01-06 09:30:00	3.414	135.303	3.93933	134.583	3.428	145.797	3.17233	152.484	26.46	978.422	60.4321	10.5155
2019-01-06 09:45:00	2.39267	140.51	2.40533	131.369	2.91667	143.243	2.14967	145.097	26.46	978.754	61.3139	7.86633
2019-01-06 10:00:00	4.946	157.17	4.70633	150.784	4.962	145.947	4.70633	157.854	26.46	979.015	59.0467	5.15431
2019-01-06 10:15:00	4.69067	148.774	4.962	139.46	5.98467	150.848	4.70633	155.654	26.46	979.3	58.7037	5.74918
2019-01-06 10:30:00	5.45667	157.25	5.47333	151.985	5.98467	152.762	5.47333	163.008	26.46	979.301	61.5684	5.88219
2019-01-06 10:45:00	3.15867	166.841	2.661	147.5	3.17233	139.884	2.91667	180.479	26.46	979.609	61.0231	1.74766
2019-01-06 11:00:00	3.414	145.746	3.428	146.532	3.93933	148.259	3.17233	150.04	26.46	979.609	58.1558	1.65899
2019-01-06 11:15:00	3.15867	203.269	3.68367	184.294	2.91667	180.001	3.428	215.464	26.46	979.122	54.9295	1.46685
2019-01-06 11:30:00	4.18	151.531	3.93933	135.044	4.962	137.922	4.45067	178.409	26.46	979.013	54.62	0.554227
2019-01-06 11:45:00	2.13733	141.776	5.21767	132.824	5.729	141.483	2.40533	160.848	26.46	978.715	54.6542	0.288198
2019-01-06 12:00:00	3.414	181.555	5.47333	183.261	6.496	174.36	3.428	175.75	26.46	978.418	53.3903	0.60226
2019-01-06 12:15:00	3.414	183.213	3.17233	184.944	3.428	198.384	3.428	190.994	26.46	978.418	53.322	0.00369485
2019-01-06 12:30:00	1.62667	137.117	2.661	160.433	1.894	189.896	2.40533	163.336	26.46	978.121	53.2195	-0.299282
2019-01-06 12:45:00	0	186.286	0	136.141	0	147.044	0	110.265	26.46	977.823	50.6917	-0.288198
2019-01-06 13:00:00	2.90333	203.383	2.14967	174.286	2.14967	185.311	3.68367	191.798	26.46	978.121	50.4868	-0.328841
2019-01-06 13:15:00	3.414	184.945	3.17233	181.018	3.17233	163.799	3.428	182.701	26.46	977.823	51.5457	-0.0184742
2019-01-06 13:30:00	3.92467	162.385	4.70633	156.555	5.21767	189.091	4.195	171.897	26.46	977.526	52.468	1.23038
2019-01-06 13:45:00	4.69067	153.117	5.47333	146.263	4.70633	133.264	4.70633	174.579	26.46	977.526	52.5363	0.812866
2019-01-06 14:00:00	3.15867	181.433	4.70633	167.506	3.93933	191.652	3.428	165.872	26.46	977.675	52.6046	0.317757
2019-01-06 14:15:00	3.414	152.727	2.40533	148.336	3.93933	143.581	3.68367	156.531	26.46	977.823	55.0641	0.23647
2019-01-06 14:30:00	5.45667	173.897	5.21767	168.969	5.47333	183.286	5.47333	170.458	26.46	977.823	54.8591	0.469245
2019-01-06 14:45:00	4.946	159.482	5.47333	142.921	5.729	146.044	5.21767	149.166	26.46	977.877	55.269	0.820256
2019-01-06 15:00:00	5.45667	159.675	4.962	158.799	5.47333	169.652	5.729	170.091	26.46	977.776	56.9848	2.23908
2019-01-06 15:15:00	4.43533	132.811	5.47333	134.133	4.195	140.813	4.962	141.13	26.46	977.527	57.6071	2.96696
2019-01-06 15:30:00	3.92467	153.155	5.47333	144.084	5.47333	148.52	4.45067	157.961	26.46	977.528	59.9295	5.07302
2019-01-06 15:45:00	4.946	152.423	5.729	147.45	5.47333	169.012	4.962	171.744	26.46	977.82	58.3236	4.97696
2019-01-06 16:00:00	3.92467	149.153	5.21767	147.498	4.45067	151.202	4.195	154.202	26.46	977.501	60.2706	5.18387
2019-01-06 16:15:00	3.92467	146.996	3.93933	146.416	3.17233	144.873	3.93933	156.486	26.46	976.916	61.5749	7.75179
2019-01-06 16:30:00	4.43533	182.837	5.729	172.498	7.263	199.574	4.195	192.645	26.46	976.636	64.8898	9.76178
2019-01-06 16:45:00	5.45667	167.739	6.75167	143.884	7.00733	149.072	5.21767	163.713	26.46	976.369	65.9605	12.9541
2019-01-06 17:00:00	4.18	171.501	4.70633	142.227	5.729	135.941	3.93933	169.329	26.46	976.332	65.6294	12.5662
2019-01-06 17:15:00	6.22267	148.218	6.24033	146.181	5.47333	153.197	6.24033	156.394	26.46	976.043	67.4756	13.3569
2019-01-06 17:30:00	3.92467	158.176	3.428	154.699	5.21767	137.162	3.68367	172.649	26.46	975.746	68.1593	13.1832
2019-01-06 17:45:00	4.946	143.435	5.21767	133.612	4.70633	153.417	5.21767	159.25	26.46	975.746	69.5266	12.3445
2019-01-06 18:00:00	4.69067	152.335	5.47333	145.736	5.729	147.478	4.962	159.389	26.46	976.043	70.594	13.9333
2019-01-06 18:15:00	5.20133	150.463	4.70633	146.818	5.729	145.093	4.70633	165.329	26.46	975.746	72.4094	8.3134
2019-01-06 18:30:00	5.96733	147.389	3.428	141.132	3.17233	151.295	5.729	152.198	26.46	976.043	73.4017	6.35144
2019-01-06 18:45:00	5.45667	145.143	4.45067	144.964	4.195	158.52	5.21767	152.296	26.46	976.043	75.1453	3.71701
2019-01-06 19:00:00	4.946	158.325	4.962	150.432	4.45067	164.012	4.70633	169.456	26.46	976.043	73.9145	3.52488
2019-01-06 19:15:00	4.69067	153.858	5.21767	138.032	4.45067	145.754	4.195	159.716	26.46	976.043	70.2222	2.797
2019-01-06 19:30:00	4.69067	154.224	4.195	141.059	3.17233	145.436	4.70633	159.985	26.46	976.043	68.7863	3.92762
2019-01-06 19:45:00	4.43533	152.955	4.45067	143.109	3.93933	150.318	4.45067	159.912	26.46	976.043	69.5385	1.9361
2019-01-06 20:00:00	3.414	150.904	3.17233	139.985	2.40533	145.241	3.428	157.617	26.46	976.043	70.3248	0.424907
2019-01-06 20:15:00	2.90333	149.928	3.17233	134.81	2.91667	138.016	3.17233	160.4	26.46	976.192	70.9743	0.47294
2019-01-06 20:30:00	3.414	152.1	3.428	148.187	2.91667	149.049	3.428	161.669	26.46	976.34	70.8034	1.10476
2019-01-06 20:45:00	4.18	153.272	3.93933	147.406	3.17233	157.348	4.45067	165.794	26.46	976.489	70.8718	3.28841
2019-01-06 21:00:00	4.18	153.931	3.17233	155.217	3.17233	166.039	3.93933	164.427	26.46	976.638	70.7008	2.97435
2019-01-06 21:15:00	1.62667	143.874	2.14967	144.867	2.40533	156.372	1.63833	168.895	26.46	976.935	70.6325	1.88807
2019-01-06 21:30:00	4.69067	153.492	4.195	141.498	3.17233	153.15	4.70633	159.985	26.46	976.638	70.4273	3.89067
2019-01-06 21:45:00	4.43533	152.369	3.428	151.897	2.14967	159.936	4.45067	158.032	26.46	976.638	73.2308	4.27494
2019-01-06 22:00:00	3.66933	158.325	3.93933	152.776	3.428	159.301	3.93933	169.334	26.46	976.786	73.1624	3.23299
2019-01-06 22:15:00	4.946	163.964	3.68367	152.776	3.93933	167.528	4.962	180.294	26.46	976.638	75.4872	3.65051
2019-01-06 22:30:00	3.414	159.744	2.91667	156.099	2.661	157.742	3.17233	171.998	26.46	976.935	75.2834	2.54205
2019-01-06 22:45:00	4.18	156.812	3.68367	154.045	3.17233	151.734	3.68367	167.65	26.46	976.638	76.171	2.61595
2019-01-06 23:00:00	3.66933	165.16	3.17233	149.554	3.68367	150.514	3.428	176.047	26.46	976.638	75.5556	1.52967
2019-01-06 23:15:00	2.90333	158.13	2.14967	151.604	2.14967	147.487	2.40533	169.065	26.46	976.638	76.7863	0.23647
2019-01-06 23:30:00	3.15867	168.284	2.40533	158.878	2.661	148.488	3.428	175.656	26.46	976.638	76.6496	0.144099
2019-01-06 23:45:00	3.414	160.961	3.17233	159.806	2.14967	163.964	3.428	173.288	26.46	976.638	76.8547	0.0997608
2019-01-07	3.92467	173.093	3.17233	165.957	2.661	166.624	3.68367	174.216	26.46	976.935	76.2393	0.465551
2019-01-07 00:15:00	3.66933	169.212	2.91667	162.442	1.894	165.99	3.68367	174.094	26.46	976.935	76.4787	0.48772
2019-01-07 00:30:00	3.414	170.213	2.40533	153.606	2.40533	157.837	3.428	178.048	26.46	976.935	76.1368	0.402738
2019-01-07 00:45:00	3.15867	169.651	2.91667	158.341	2.14967	168.577	3.428	172.483	26.46	976.935	76.6496	0.454466
2019-01-07 01:00:00	3.15867	157.739	2.661	148.87	2.14967	188.984	3.17233	161.01	26.46	976.638	74.8718	0.391654
2019-01-07 01:15:00	3.66933	156.958	2.661	152.873	1.894	177.756	3.93933	162.646	26.46	976.638	76.0684	0.875678
2019-01-07 01:30:00	3.92467	156.177	2.91667	148.113	2.14967	147.243	3.428	163.646	26.46	976.935	77.4701	0.48772
2019-01-07 01:45:00	3.15867	144.46	2.661	143.402	1.38267	125.029	3.17233	156.299	26.46	976.638	77.1966	0.399043
2019-01-07 02:00:00	3.92467	163.598	2.40533	147.137	1.894	159.692	4.195	162.987	26.46	976.935	79.453	1.08259
2019-01-07 02:15:00	3.66933	151.002	3.17233	137.544	2.661	149.147	3.68367	161.108	26.46	976.935	79.8633	0.550532
2019-01-07 02:30:00	3.15867	157.641	3.428	144.745	2.91667	141.384	3.428	162.182	26.46	976.638	80.3761	-0.169963
2019-01-07 02:45:00	2.648	170.237	2.661	154.533	2.14967	166.039	2.661	172.629	26.46	976.638	77.4017	-0.328841
2019-01-07 03:00:00	1.37133	160.058	1.63833	138.716	1.127	139.773	1.894	174.777	26.46	976.638	75.8291	-0.299282
2019-01-07 03:15:00	1.62667	172.971	2.91667	158.146	2.91667	161.157	1.63833	194.452	26.46	976.34	74.9744	-0.317757
2019-01-07 03:30:00	3.15867	170.262	3.428	161.271	3.17233	165.99	3.17233	178.39	26.46	976.638	73.3675	-0.328841
2019-01-07 03:45:00	3.414	174.143	2.40533	169.375	1.894	194.452	3.17233	176.413	26.46	976.638	72.8205	-0.295588
2019-01-07 04:00:00	2.39267	173.264	2.40533	164.493	1.38267	181.856	2.661	176.535	26.46	976.34	75.9658	-0.328841
2019-01-07 04:15:00	1.882	190.546	1.894	159.122	1.127	166.429	1.894	196.844	26.46	976.34	76.7863	-0.317757
2019-01-07 04:30:00	2.13733	202.312	2.40533	180.213	2.40533	175.022	2.14967	204.558	26.46	976.34	77.1624	-0.328841
2019-01-07 04:45:00	2.39267	207.048	3.17233	183.411	2.40533	194.843	2.40533	215.909	26.46	976.34	76	-0.299282
2019-01-07 05:00:00	1.882	191.523	2.40533	169.18	2.14967	174.338	2.14967	199.237	26.46	976.34	76.1026	-0.336231
2019-01-07 05:15:00	2.13733	195.038	2.661	178.065	1.63833	178.244	2.14967	203.045	26.46	976.192	76.8205	-0.336231
2019-01-07 05:30:00	2.13733	189.326	1.894	183.533	1.894	174.338	2.14967	201.971	26.46	976.34	78.5641	-0.317757
2019-01-07 05:45:00	1.37133	223.744	1.894	192.711	1.127	194.354	1.63833	245.665	26.46	976.34	79.1453	-0.328841
2019-01-07 06:00:00	1.62667	267.781	1.38267	234.575	0	194.379	1.38267	281.768	26.46	976.489	79.1111	-0.347315
2019-01-07 06:15:00	2.90333	327.39	2.661	320.328	2.40533	302.004	2.661	327.781	26.46	976.043	77.3675	-0.299282
2019-01-07 06:30:00	1.882	322.997	1.38267	336.854	1.127	302.297	1.38267	326.17	26.46	976.043	78.7009	-0.317757
2019-01-07 06:45:00	1.116	322.997	1.63833	336.829	1.127	302.297	1.127	325.804	26.46	976.192	76.8547	-0.299282
2019-01-07 07:00:00	1.37133	320.726	1.38267	312.272	0	302.175	1.38267	323.875	26.46	976.638	77.0599	-0.317757
2019-01-07 07:15:00	3.15867	309.815	2.40533	300.556	2.14967	302.297	2.91667	317.236	26.46	976.935	77.9146	-0.317757
2019-01-07 07:30:00	3.414	323.485	2.91667	315.006	2.40533	303.322	2.91667	322.508	26.46	977.084	78.0171	-0.317757
2019-01-07 07:45:00	3.414	337.74	3.17233	331.41	2.661	341.939	3.428	337.057	26.46	977.232	78.8376	-0.317757
2019-01-07 08:00:00	3.414	2.63631	2.91667	1.4482	2.40533	13.5721	2.91667	0.537026	26.46	976.935	79.9316	-0.373179
2019-01-07 08:15:00	3.92467	327.39	3.68367	323.306	3.428	334.421	3.68367	330.32	26.46	978.273	78.9744	-0.0184742
2019-01-07 08:30:00	4.946	350.727	3.93933	0.0652351	1.63833	14.0603	4.195	345.161	26.46	978.125	79.7265	2.42382
2019-01-07 08:45:00	5.45667	338.493	4.45067	2.60361	4.962	12.4979	4.195	356.776	26.46	977.827	81.1272	5.10258
2019-01-07 09:00:00	4.43533	354.284	5.47333	3.5522	5.729	13.1795	4.195	0.195251	26.46	977.53	82.517	7.45989
2019-01-07 09:15:00	5.96733	15.5711	4.962	1.2333	5.47333	2.29417	5.98467	11.422	26.46	977.678	82.6526	9.29993
2019-01-07 09:30:00	6.98867	9.78684	7.51867	3.96678	5.98467	0.268467	6.75167	11.6661	26.46	977.53	82.4475	8.28015
2019-01-07 09:45:00	5.96733	7.90757	6.24033	9.18968	3.428	0.536934	5.98467	7.59029	26.46	978.125	79.8154	4.74788
2019-01-07 10:00:00	3.92467	0.0976242	5.98467	11.6059	5.21767	0.780994	3.17233	14.2531	26.46	978.422	76.568	2.40904
2019-01-07 10:15:00	5.20133	23.8183	4.45067	11.4811	3.93933	349.026	4.70633	22.8909	26.46	978.757	73.6905	0.657682
2019-01-07 10:30:00	3.66933	0.0975964	3.68367	1.18829	3.68367	354.934	3.428	0.585579	26.46	978.718	71.6596	0.158878
2019-01-07 10:45:00	1.62667	4.00123	1.38267	15.8036	2.40533	353.182	1.63833	9.95429	26.46	979.015	70.4597	-0.284503
2019-01-07 11:00:00	0.372	0.097591	1.127	24.1355	1.63833	290.675	0	17.5176	26.46	979.609	64.924	-0.299282
2019-01-07 11:15:00	0.372	15.0994	2.14967	19.8536	0	289.303	0.751333	356.58	26.46	979.802	66.7226	-0.299282
2019-01-07 11:30:00	1.116	20.1945	1.38267	19.7561	2.14967	289.893	0.751333	18.536	26.46	979.162	67.7712	-0.299282
2019-01-07 11:45:00	2.90333	316.038	2.661	298.721	1.38267	276.722	2.91667	324.574	26.46	979.012	65.8924	-0.299282
2019-01-07 12:00:00	0	23.2176	1.38267	0.782063	0.751333	277.587	0.751333	56.0442	26.46	979.012	62.8493	-0.299282
2019-01-07 12:15:00	2.90333	341.955	3.428	305.131	2.91667	298.723	3.68367	340.712	26.46	979.012	64.5106	-0.299282
2019-01-07 12:30:00	2.39267	305.839	3.17233	293.593	2.661	302.767	2.661	318.104	26.46	978.715	64.1683	-0.299282
2019-01-07 12:45:00	2.90333	310.736	3.428	299.223	2.91667	321.979	3.428	312.419	26.46	978.418	64.3483	-0.317757
2019-01-07 13:00:00	1.116	340.134	3.17233	320.963	1.894	236.723	0.631333	1.6097	26.46	978.121	61.6907	-0.299282
2019-01-07 13:15:00	1.882	60.1199	2.40533	336.915	3.17233	1.26825	2.14967	26.8283	26.46	978.121	60.8027	-0.317757
2019-01-07 13:30:00	3.15867	21.5109	2.661	318.053	3.428	298.226	2.91667	55.6796	26.46	978.418	60.0155	-0.299282
2019-01-07 13:45:00	5.45667	343.342	4.195	19.8293	3.428	348.658	5.98467	335.172	26.46	978.269	59.0202	-0.22908
2019-01-07 14:00:00	3.92467	45.3845	2.91667	2.09982	1.63833	352.882	3.68367	33.8494	26.46	978.418	58.4745	-0.206911
2019-01-07 14:15:00	3.66933	80.8663	1.894	303.758	0.751333	344.438	3.17233	22.5333	26.46	978.418	57.9953	0.0295588
2019-01-07 14:30:00	3.66933	0.0975552	4.195	6.16919	3.17233	352.833	3.68367	349.735	26.46	978.269	57.7953	0.443381
2019-01-07 14:45:00	1.62667	40.8279	1.63833	52.7048	0.375667	349.744	2.91667	32.1696	26.46	977.972	59.0948	0.443381
2019-01-07 15:00:00	3.15867	19.292	3.68367	15.4134	2.661	311.282	3.17233	7.41438	26.46	977.823	59.8463	1.59248
2019-01-07 15:15:00	3.15867	8.73141	1.63833	18.4377	1.894	256.65	2.661	11.7069	26.46	977.526	58.8215	1.48163
2019-01-07 15:30:00	3.15867	28.7805	4.70633	9.68296	2.40533	272.537	2.40533	0.195122	26.46	977.245	61.5564	1.74397
2019-01-07 15:45:00	4.69067	0.0975813	3.93933	21.8624	4.195	273.569	3.93933	333.728	26.46	977.068	61.7741	2.22799
2019-01-07 16:00:00	3.92467	338.074	2.40533	11.8031	4.70633	273.743	3.68367	353.955	26.46	976.933	61.4331	1.70332
2019-01-07 16:15:00	1.882	352.864	3.17233	320.006	2.91667	273.352	2.40533	351.815	26.46	976.931	62.2585	1.38557
2019-01-07 16:30:00	3.66933	348.571	3.428	17.2675	2.40533	273.255	3.428	356.793	26.46	976.636	63.6938	1.31167
2019-01-07 16:45:00	4.18	351.818	3.93933	24.453	3.68367	273.452	3.428	351.476	26.46	976.636	63.6943	1.1491
2019-01-07 17:00:00	3.15867	351.437	3.68367	19.8536	3.428	273.546	2.91667	53.367	26.46	976.5	63.4997	0.908932
2019-01-07 17:15:00	3.15867	354.129	3.68367	8.48044	3.17233	273.419	3.68367	1.78163	26.46	976.577	61.7324	0.993913
2019-01-07 17:30:00	3.15867	353.229	3.428	8.96845	3.68367	273.495	3.17233	353.986	26.46	976.935	60.229	1.09737
2019-01-07 17:45:00	3.92467	355.539	3.17233	14.4111	3.68367	273.488	3.428	5.02753	26.46	977.084	57.8007	0.990219
2019-01-07 18:00:00	3.66933	353.739	3.93933	26.8593	3.93933	273.493	4.195	354.325	26.46	977.232	57.8017	1.44838
2019-01-07 18:15:00	3.92467	351.729	4.195	18.194	3.93933	273.584	4.195	62.8193	26.46	977.232	56.5356	2.60856
2019-01-07 18:30:00	2.90333	356.67	3.17233	10.4328	3.428	273.494	2.661	18.2557	26.46	977.084	56.6057	2.77852
2019-01-07 18:45:00	3.92467	7.90757	3.17233	1.01207	2.661	273.495	3.68367	11.3	26.46	977.232	54.1446	1.78461
2019-01-07 19:00:00	3.66933	27.4324	3.17233	22.369	2.661	273.495	3.17233	31.5327	26.46	976.935	53.4609	0.713105
2019-01-07 19:15:00	3.414	31.8743	3.428	21.2463	2.40533	273.47	3.17233	31.1422	26.46	977.084	50.8973	0.302977
2019-01-07 19:30:00	3.15867	27.7497	3.428	19.1962	2.661	273.446	2.91667	29.4825	26.46	977.232	50.3845	0.665072
2019-01-07 19:45:00	4.18	14.6436	3.68367	10.7029	3.17233	273.47	3.93933	20.2082	26.46	977.53	49.154	0.783307
2019-01-07 20:00:00	4.18	10.9339	3.68367	8.45749	2.91667	273.495	3.93933	16.108	26.46	977.53	48.4703	1.11954
2019-01-07 20:15:00	4.18	10.7875	3.93933	2.99053	3.17233	273.495	3.428	16.9866	26.46	977.827	49.8376	0.964355
2019-01-07 20:30:00	3.66933	29.6778	3.17233	21.8808	3.17233	273.495	3.428	34.6566	26.46	977.827	47.1714	0.406433
2019-01-07 20:45:00	2.39267	29.3849	3.17233	39.1603	2.91667	273.495	2.40533	32.7774	26.46	977.827	45.3256	-0.299282
2019-01-07 21:00:00	2.39267	1.12268	2.661	3.20862	1.894	273.348	1.894	17.548	26.46	978.125	46.2143	-0.362095
2019-01-07 21:15:00	3.414	356.378	3.68367	8.96845	4.70633	273.69	3.428	352.424	26.46	978.125	45.2572	2.43121
2019-01-07 21:30:00	2.90333	355.157	4.962	15.7045	4.45067	273.592	4.962	356.817	26.46	978.422	44.847	4.31558
2019-01-07 21:45:00	4.18	74.3897	5.47333	11.5067	3.93933	273.592	3.428	79.0269	26.46	978.273	47.1031	5.58291
2019-01-07 22:00:00	3.92467	11.2268	4.195	2.60003	3.428	273.543	3.68367	10.5434	26.46	978.125	49.9744	3.65051
2019-01-07 22:15:00	4.69067	6.34558	4.195	3.91796	3.93933	273.617	4.45067	10.0553	26.46	978.125	50.8973	5.26146
2019-01-07 22:30:00	4.946	5.2229	4.70633	5.38232	3.93933	273.641	4.70633	7.32182	26.46	978.125	46.4194	6.32558
2019-01-07 22:45:00	4.946	9.2255	4.70633	5.2847	3.68367	273.641	4.45067	15.4246	26.46	978.125	44.1634	4.31558
2019-01-07 23:00:00	3.92467	16.0104	4.45067	11.1422	3.93933	273.641	3.68367	26.2121	26.46	978.422	42.4543	3.14062
2019-01-07 23:15:00	4.18	32.997	4.195	17.3901	3.68367	273.641	3.428	33.2899	26.46	978.422	42.6594	3.07042
2019-01-07 23:30:00	3.15867	38.708	3.428	33.9374	3.68367	273.641	2.661	38.8545	26.46	978.125	41.2237	1.17866
2019-01-07 23:45:00	1.882	39.3182	3.428	37.9888	3.93933	273.665	1.894	38.0979	26.46	978.125	43.4114	-0.299282
2019-01-08	0.744	24.7722	2.40533	25.5906	3.17233	273.592	0.375667	0.439309	26.46	978.422	45.1205	-0.306672
2019-01-08 00:15:00	2.648	32.8994	2.91667	35.8899	2.91667	273.592	2.14967	29.8974	26.46	978.422	44.2318	-0.336231
2019-01-08 00:30:00	1.62667	39.1957	2.91667	33.888	3.17233	273.614	1.63833	35.5349	26.46	978.422	44.0262	-0.317757
2019-01-08 00:45:00	2.648	30.7517	3.428	28.0312	3.17233	273.641	2.40533	32.6309	26.46	978.571	43.7532	-0.306672
2019-01-08 01:00:00	3.414	43.54	3.68367	37.4513	3.17233	273.638	2.91667	46.6151	26.46	978.422	44.8465	-0.343621
2019-01-08 01:15:00	5.45667	50.3253	4.70633	45.2131	4.962	273.983	4.962	50.1301	26.46	978.422	46.6929	0.905237
2019-01-08 01:30:00	5.45667	41.0022	4.962	30.9111	3.68367	274.129	5.47333	49.5443	26.46	978.571	47.1031	1.38557
2019-01-08 01:45:00	4.43533	34.4614	4.962	21.2219	4.195	274.08	4.45067	32.875	26.46	978.571	44.7787	3.71701
2019-01-08 02:00:00	6.98867	41.051	5.47333	23.9554	4.195	274.422	6.496	48.0312	26.46	978.422	40.9503	4.28972
2019-01-08 02:15:00	6.22267	30.2149	5.47333	8.31125	1.63833	274.668	6.24033	37.8785	26.46	978.571	43.8219	6.42534
2019-01-08 02:30:00	5.712	38.2707	5.98467	28.6194	3.68367	276.803	5.729	44.5189	26.46	978.719	36.1666	8.78265
2019-01-08 02:45:00	6.478	42.6901	5.729	34.0888	3.68367	277.254	6.24033	43.7641	26.46	978.571	31.553	10.6485
2019-01-08 03:00:00	6.478	37.4927	7.00733	29.136	5.47333	278.291	6.24033	44.962	26.46	978.422	29.469	11.6277
2019-01-08 03:15:00	7.244	46.1081	5.47333	28.5246	5.47333	279.236	7.00733	51.8685	26.46	978.422	23.1097	11.0808
2019-01-08 03:30:00	6.98867	40.4189	5.47333	26.6184	4.962	279.173	6.496	49.5473	26.46	978.422	21.8779	8.94522
2019-01-08 03:45:00	5.45667	34.7082	5.729	35.9187	5.729	279.496	4.70633	43.91	26.46	978.273	21.0579	8.48337
2019-01-08 04:00:00	3.92467	26.4584	4.45067	7.14184	1.38267	278.35	2.661	40.8104	26.46	978.422	23.3826	7.36013
2019-01-08 04:15:00	5.20133	37.7859	4.962	30.7229	3.93933	278.854	4.45067	38.9819	26.46	978.125	21.1275	6.96478
2019-01-08 04:30:00	6.22267	31.3426	5.21767	25.5981	3.93933	278.861	6.24033	38.2262	26.46	978.125	21.4699	5.52749
2019-01-08 04:45:00	5.20133	34.8089	4.45067	21.595	3.68367	278.764	4.70633	38.6657	26.46	978.273	20.5128	5.20234
2019-01-08 05:00:00	5.712	34.1744	5.47333	17.7383	3.93933	278.814	5.47333	43.1329	26.46	978.422	20.3077	4.09758
2019-01-08 05:15:00	4.69067	27.193	4.70633	14.1255	4.195	278.692	4.195	36.3713	26.46	978.422	19.9658	4.47815
2019-01-08 05:30:00	4.946	26.4607	4.962	16.5666	3.93933	278.911	4.45067	29.927	26.46	978.422	19.6239	3.83525
2019-01-08 05:45:00	5.45667	21.3098	5.729	11.9281	5.21767	279.053	5.21767	30.4391	26.46	978.719	19.8287	4.03477
2019-01-08 06:00:00	5.712	24.8985	5.729	18.7635	3.428	278.667	4.962	39.0076	26.46	978.719	19.8974	3.52119
2019-01-08 06:15:00	6.22267	29.9758	4.70633	30.9442	3.93933	279.009	5.729	44.744	26.46	978.719	19.282	3.62095
2019-01-08 06:30:00	4.946	17.8439	5.21767	19.2517	4.195	279.009	4.70633	21.3834	26.46	979.017	19.4872	4.98065
2019-01-08 06:45:00	7.49933	26.4363	6.24033	20.4722	4.45067	279.009	7.00733	38.495	26.46	979.017	19.4188	6.47706
2019-01-08 07:00:00	6.478	24.6788	6.75167	15.5413	5.47333	279.766	5.729	29.5608	26.46	979.017	19.0427	11.0291
2019-01-08 07:15:00	5.712	29.0236	5.21767	19.7153	4.45067	279.056	5.47333	33.4419	26.46	979.611	19.6922	12.6068
2019-01-08 07:30:00	6.22267	26.1188	5.729	20.5451	4.195	279.446	5.729	35.7607	26.46	979.611	20.5126	17.8683
2019-01-08 07:45:00	7.244	21.5787	7.00733	10.879	5.729	279.741	7.00733	22.2133	26.46	979.017	20.9573	33.8448
2019-01-08 08:00:00	9.28667	22.2133	7.51867	9.21907	5.98467	281.621	9.30833	22.9456	26.46	979.165	22.2906	32.7881
2019-01-08 08:15:00	10.308	17.9171	8.797	6.85128	7.51867	284.233	10.0753	20.9196	26.46	979.314	21.6752	31.5725
2019-01-08 08:30:00	7.75467	19.04	7.77433	10.4152	7.263	287.089	7.51867	27.3883	26.46	979.611	22.7009	28.4021
2019-01-08 08:45:00	8.01	28.9499	6.496	20.4713	4.45067	287.571	7.51867	31.5862	26.46	980.355	22.1534	20.7392
2019-01-08 09:00:00	8.52067	20.2573	6.496	9.75139	4.962	289.631	8.03	24.26	26.46	980.801	22.1503	15.2043
2019-01-08 09:15:00	7.75467	28.8236	6.75167	17.1949	2.14967	290.53	7.00733	26.3586	26.46	981.693	21.6032	9.88741
2019-01-08 09:30:00	4.69067	6.15033	4.195	0.501114	4.45067	291.165	4.962	18.2313	26.46	982.288	25.0214	6.40317
2019-01-08 09:45:00	9.28667	15.7175	9.30833	8.01819	5.729	292.483	8.797	18.7195	26.46	982.288	22.4235	8.48706
2019-01-08 10:00:00	6.73333	10.1529	6.24033	13.4605	5.729	296.483	4.962	14.4971	26.46	982.765	23.5172	11.5168
2019-01-08 10:15:00	7.49933	25.6245	8.797	25.0504	3.17233	297.44	7.77433	26.7471	26.46	982.656	22.9346	17.8831
2019-01-08 10:30:00	6.478	356.743	6.75167	20	6.75167	298.836	7.263	9.07781	26.46	982.899	24.4369	25.0104
2019-01-08 10:45:00	8.52067	7.49152	9.81967	4.35354	6.24033	301.003	8.28567	16.7644	26.46	982.888	23.9239	36.0432
2019-01-08 11:00:00	10.5633	12.3474	8.28567	1.0153	3.68367	301.583	10.331	11.2493	26.46	982.737	22.0779	42.6887
2019-01-08 11:15:00	9.28667	15.3237	10.5867	11.0379	5.729	66.4436	9.564	15.7386	26.46	982.582	21.1884	40.2451
2019-01-08 11:30:00	8.776	16.4469	10.8423	4.84112	5.47333	337.185	8.797	20.3512	26.46	982.582	20.2324	40.6248
2019-01-08 11:45:00	9.79733	11.4215	9.30833	4.45373	8.28567	30.2621	9.30833	15.1799	26.46	982.164	19.5513	47.0799
2019-01-08 12:00:00	9.542	19.9639	9.81967	5.57727	7.263	50.4956	9.564	12.2273	26.46	982.21	19.2785	39.9708
2019-01-08 12:15:00	9.03133	18.7927	8.28567	10.9469	6.75167	322.892	8.797	24.5037	26.46	982.386	19.0737	32.3815
2019-01-08 12:30:00	9.03133	9.17643	11.098	6.60189	4.45067	325.056	9.05267	13.4718	26.46	982.065	18.9364	31.0987
2019-01-08 12:45:00	11.84	17.3012	12.1207	10.7956	7.00733	331.553	11.6093	20.1562	26.46	981.697	19.2073	34.8839
2019-01-08 13:00:00	11.074	2.12281	10.0753	5.11592	8.03	333.208	9.564	7.63724	26.46	981.69	20.1284	37.2092
2019-01-08 13:15:00	8.26533	10.0521	9.30833	0.982435	7.263	337.793	7.77433	21.7632	26.46	981.69	20.9469	39.8489
2019-01-08 13:30:00	11.3293	5.12353	11.6093	1.5797	5.98467	32.8882	10.8423	7.5633	26.46	981.542	21.3907	43.1817
2019-01-08 13:45:00	7.244	356.817	7.263	5.32486	9.05267	15.273	6.496	6.83137	26.46	981.69	22.0058	42.8085
2019-01-08 14:00:00	10.308	9.02717	11.098	0.616098	8.797	4.56238	10.0753	13.1504	26.46	981.69	22.04	40.7622
2019-01-08 14:15:00	7.49933	20.3965	7.51867	20.3783	0.751333	6.4898	6.24033	13.492	26.46	982.285	22.4842	35.5149
2019-01-08 14:30:00	9.28667	15.7122	8.28567	15.8403	5.98467	25.9592	9.05267	18.5667	26.46	981.839	22.8601	34.4294
2019-01-08 14:45:00	5.96733	15.3462	8.28567	6.08119	5.98467	4.85515	6.75167	15.1754	26.46	982.433	22.8259	34.3251
2019-01-08 15:00:00	9.03133	11.5645	10.0753	4.64173	8.28567	12.1501	9.30833	16.5905	26.46	982.285	22.6892	35.328
2019-01-08 15:15:00	6.22267	6.56299	7.51867	16.7186	5.21767	18.6887	5.98467	9.31994	26.46	982.136	22.9968	37.782
2019-01-08 15:30:00	9.28667	16.4938	9.564	5.30181	8.28567	21.1296	9.564	18.5677	26.46	981.988	23.0322	38.6739
2019-01-08 15:45:00	9.79733	17.1792	8.797	14.3828	7.51867	2.36702	9.30833	15.3246	26.46	982.136	22.9668	31.5355
2019-01-08 16:00:00	6.73333	7.19978	10.5867	8.94554	3.68367	37.2192	6.75167	2.63585	26.46	982.1	23.0387	27.4305
2019-01-08 16:15:00	5.712	86.3487	6.75167	0.598732	6.75167	10.8119	5.98467	92.3526	26.46	982.288	22.9704	26.236
2019-01-08 16:30:00	9.28667	17.8164	9.564	11.9232	7.51867	6.66286	9.30833	22.478	26.46	981.693	23.0388	24.9698
2019-01-08 16:45:00	9.542	1.34233	6.75167	5.77125	7.77433	7.56589	9.05267	14.5704	26.46	981.99	23.449	23.4992
2019-01-08 17:00:00	7.244	9.81124	7.00733	1.50019	5.47333	2.0013	7.00733	15.2294	26.46	981.693	23.3464	21.02
2019-01-08 17:15:00	8.26533	85.885	7.263	2.25835	4.962	356.89	7.77433	12.9352	26.46	981.693	23.5173	18.6774
2019-01-08 17:30:00	5.96733	15.23	5.21767	2.84189	4.195	356.928	5.21767	11.7642	26.46	981.693	23.9968	13.3827
2019-01-08 17:45:00	6.478	13.4011	6.24033	4.11719	4.70633	24.1904	5.98467	13.9138	26.46	981.693	24.8887	11.4873
2019-01-08 18:00:00	6.22267	9.83733	6.75167	7.24184	2.91667	14.9879	5.47333	13.4012	26.46	981.396	25.5726	8.58682
2019-01-08 18:15:00	4.69067	2.56308	4.70633	5.38666	3.428	13.6697	3.93933	14.2068	26.46	981.693	26.188	7.10149
2019-01-08 18:30:00	4.69067	11.1067	4.195	4.31261	2.14967	356.976	3.93933	14.9391	26.46	981.842	26.6667	4.96957
2019-01-08 18:45:00	4.18	9.32472	3.93933	3.1081	3.17233	5.37026	3.428	19.9188	26.46	981.99	27.282	2.77852
2019-01-08 19:00:00	4.18	3.22215	3.428	5.28902	2.40533	339.547	4.195	13.7674	26.46	981.99	28.0684	4.06802
2019-01-08 19:15:00	4.18	10.9114	3.17233	3.1081	1.38267	342.525	3.428	13.0839	26.46	982.288	28.9914	1.92501
2019-01-08 19:30:00	2.90333	0.707897	3.428	10.6753	2.661	1.17169	2.14967	6.83487	26.46	982.139	29.4017	3.04455
2019-01-08 19:45:00	3.414	0.244105	4.195	10.8705	4.195	349.167	3.428	90.4652	26.46	982.437	29.6071	3.73179
2019-01-08 20:00:00	2.39267	19.1386	3.93933	17.4473	2.14967	7.34786	2.40533	355.187	26.46	982.288	30.7024	6.26646
2019-01-08 20:15:00	5.45667	12.5969	5.21767	6.60969	2.40533	0.0488251	4.70633	18.5047	26.46	982.174	31.4902	6.61377
2019-01-08 20:30:00	4.69067	16.8947	3.68367	0.956821	2.661	16.7482	3.93933	20.6545	26.46	982.47	31.5266	4.56313
2019-01-08 20:45:00	5.20133	18.7991	3.68367	5.0492	2.91667	14.3557	3.68367	12.0119	26.46	982.898	31.8003	4.0126
2019-01-08 21:00:00	6.22267	8.44739	5.98467	4.5365	3.428	17.8225	5.729	16.7971	26.46	983.063	32.0055	6.381
2019-01-08 21:15:00	7.244	13.3303	7.263	2.19271	5.729	1.24514	7.00733	18.9212	26.46	982.898	32.7577	8.05846
2019-01-08 21:30:00	6.22267	14.551	6.24033	4.60971	3.428	6.17684	5.729	17.9446	26.46	983.236	33.168	6.68767
2019-01-08 21:45:00	7.244	11.3283	7.263	4.19469	4.45067	0.0488288	7.00733	20.0198	26.46	982.955	34.4674	10.7631
2019-01-08 22:00:00	6.478	13.9895	5.21767	6.17226	3.68367	28.5649	6.24033	18.555	26.46	982.973	34.4674	12.2373
2019-01-08 22:15:00	6.478	18.7991	5.98467	6.26992	2.661	22.974	5.729	23.1449	26.46	982.927	34.741	8.65333
2019-01-08 22:30:00	5.712	23.2914	5.98467	10.1762	4.70633	8.74036	5.47333	27.4906	26.46	982.983	34.741	6.10019
2019-01-08 22:45:00	5.712	10.3517	5.729	5.29334	3.17233	43.8239	4.962	21.1673	26.46	983	35.3565	6.46967
2019-01-08 23:00:00	5.712	19.3365	4.45067	9.90805	2.661	35.8652	5.47333	20.8258	26.46	983.001	35.3569	2.88198
2019-01-08 23:15:00	4.43533	18.7015	3.428	7.63715	2.40533	38.2818	3.68367	24.2924	26.46	982.998	34.7752	1.23038
2019-01-08 23:30:00	0	50.0496	0.751333	22.7253	0	57.0321	0	43.653	26.46	983.049	35.4249	-0.447076
2019-01-08 23:45:00	2.39267	43.3621	1.894	17.4536	0	14.1611	1.894	43.4354	26.46	982.766	35.4266	-0.317757
2019-01-09	2.13733	38.3348	1.38267	5.49141	0.375667	1.95336	1.38267	38.5789	26.46	982.841	34.6079	-0.306672
2019-01-09 00:15:00	2.13733	42.3408	2.14967	6.37142	1.38267	7.86259	1.63833	35.6991	26.46	982.745	35.43	-0.321452
2019-01-09 00:30:00	1.882	24.0278	2.14967	13.7951	0	45.0765	1.127	25.3951	26.46	982.596	36.3883	-0.317757
2019-01-09 00:45:00	3.414	26.5674	3.17233	15.1139	2.40533	28.5209	2.91667	32.5988	26.46	982.69	37.0041	-0.332536
2019-01-09 01:00:00	4.43533	24.8581	2.91667	18.1906	1.894	9.30347	3.428	30.572	26.46	982.476	37.1408	-0.310367
2019-01-09 01:15:00	3.414	14.7	3.428	0.365116	1.38267	7.7407	3.17233	19.0221	26.46	982.734	32.5581	-0.310367
2019-01-09 01:30:00	5.96733	20.6337	5.21767	9.13139	3.93933	15.2128	5.47333	27.9593	26.46	982.174	34.6785	1.06412
2019-01-09 01:45:00	4.946	21.0977	4.45067	11.4023	4.195	18.4116	4.195	30.5721	26.46	982.489	32.2161	1.42991
2019-01-09 02:00:00	4.69067	22.5628	4.70633	9.30232	3.68367	14.407	4.45067	29.8884	26.46	982.233	31.8741	1.83264
2019-01-09 02:15:00	4.43533	13.3814	4.70633	3.73488	3.428	7.49651	4.195	22.9535	26.46	982.2	34.8837	2.44968
2019-01-09 02:30:00	5.45667	7.71628	4.195	4.5407	3.428	9.15698	4.962	20.1209	26.46	981.92	30.985	3.43621
2019-01-09 02:45:00	3.92467	6.34884	3.17233	4.61628	3.93933	3.34535	3.68367	12.4047	26.46	981.931	29.0014	1.67746
2019-01-09 03:00:00	4.18	18.2163	3.68367	3.7593	3.17233	17.1174	3.68367	21.6593	26.46	981.652	32.0793	0.0406433
2019-01-09 03:15:00	0	47.7628	1.127	25.2721	0	84.7326	0	34.2837	26.46	981.997	32.9685	-0.284503
2019-01-09 03:30:00	2.90333	65.8326	2.40533	55.5512	1.38267	48.6663	2.14967	67.7372	26.46	981.551	28.249	-0.354705
2019-01-09 03:45:00	2.648	77.2605	2.14967	64.6349	1.127	65.3442	1.894	87.1256	26.46	981.402	27.4966	-0.317757
2019-01-09 04:00:00	0	109.933	1.38267	103.119	1.63833	85.0256	0	106.367	26.46	981.402	25.7182	-0.336231
2019-01-09 04:15:00	0	109.493	0	103.094	0	84.9279	0	105.659	26.46	981.402	26.6758	-0.336231
2019-01-09 04:30:00	1.62667	126.342	1.38267	116.793	0.751333	140.822	0	107.662	26.46	981.396	28.0438	-0.336231
2019-01-09 04:45:00	1.882	106.514	1.63833	115.841	1.127	140.456	1.127	107.808	26.46	981.105	30.3694	-0.336231
2019-01-09 05:00:00	3.66933	139.137	2.661	97.4046	2.14967	117.258	3.17233	137.794	26.46	980.956	27.9412	-0.00738971
2019-01-09 05:15:00	3.414	129.15	2.91667	136.133	2.661	139.723	3.93933	128.417	26.46	981.105	30.643	0.679852
2019-01-09 05:30:00	2.648	148.905	2.14967	132.323	2.14967	154.667	2.661	150.297	26.46	980.956	32.7633	0.809171
2019-01-09 05:45:00	3.66933	136.06	2.91667	124.436	2.661	132.593	3.17233	138.258	26.46	980.956	34.4049	1.49272
2019-01-09 06:00:00	4.69067	99.9698	4.70633	98.9186	3.68367	96.6732	4.45067	101.264	26.46	980.807	35.9781	3.40665
2019-01-09 06:15:00	5.712	141.31	6.24033	108.881	6.75167	92.1314	5.729	140.212	26.46	980.799	36.5595	7.28993
2019-01-09 06:30:00	3.15867	134.547	3.428	137.988	3.68367	146.658	2.91667	104.658	26.46	980.772	36.3201	8.29493
2019-01-09 06:45:00	3.66933	152.616	3.17233	145.021	3.68367	180.747	3.428	149.173	26.46	981.286	36.8673	7.24559
2019-01-09 07:00:00	5.712	125.853	5.21767	126.902	5.21767	145.535	6.24033	132.544	26.46	981.308	37.2093	7.7407
2019-01-09 07:15:00	1.882	109.2	2.661	141.163	2.661	172.835	2.40533	130.347	26.46	981.255	38.9535	6.32188
2019-01-09 07:30:00	4.946	108.663	4.195	124.876	2.40533	142.995	4.45067	124.681	26.46	981.148	39.8085	7.32318
2019-01-09 07:45:00	4.946	133.326	4.195	128.831	4.45067	139.528	4.70633	120.603	26.46	980.738	40.8345	22.4166
2019-01-09 08:00:00	5.20133	123.338	3.68367	110.542	2.661	116.526	5.729	121.605	26.46	980.802	41.6553	22.8268
2019-01-09 08:15:00	6.22267	101.41	4.70633	123.435	3.93933	141.237	4.45067	158.672	26.46	981.024	41.5185	16.6416
2019-01-09 08:30:00	6.98867	142.837	4.962	133.776	4.962	153.092	6.75167	155.924	26.46	980.827	40.5576	16.3903
2019-01-09 08:45:00	6.73333	130.472	5.729	122.118	3.93933	124.759	5.98467	133.719	26.46	980.948	40.1439	14.5318
2019-01-09 09:00:00	6.478	132.961	6.24033	125.779	6.24033	116.237	6.75167	135.793	26.46	980.824	40.6224	14.1365
2019-01-09 09:15:00	5.96733	133.85	6.24033	128.57	5.21767	154.575	5.98467	138.854	26.46	981.397	40.1393	10.3419
2019-01-09 09:30:00	4.18	144.143	4.195	154.192	4.195	163.207	3.93933	123.126	26.46	981.4	41.983	8.04368
2019-01-09 09:45:00	5.45667	141.921	5.47333	135.982	5.47333	151.881	5.47333	152.027	26.46	981.694	43.4188	6.12605
2019-01-09 10:00:00	4.69067	145.388	6.24033	145.355	6.496	161.742	4.45067	140.603	26.46	981.396	43.4188	7.8146
2019-01-09 10:15:00	5.20133	162.328	7.263	147.845	4.962	153.028	5.98467	164.55	26.46	981.546	43.4872	7.62247
2019-01-09 10:30:00	6.98867	157.934	5.98467	153.41	4.70633	159.692	7.263	165.331	26.46	981.396	43.4872	6.17039
2019-01-09 10:45:00	5.712	135.77	4.70633	122.58	4.962	140.53	5.98467	144.362	26.46	981.099	43.8633	7.17169
2019-01-09 11:00:00	5.712	149.122	6.496	143.598	6.496	151.075	5.729	151.197	26.46	980.802	43.5556	7.69636
2019-01-09 11:15:00	6.22267	142.873	6.24033	132.662	6.496	143.508	5.98467	147.731	26.46	980.207	43.8291	8.40208
2019-01-09 11:30:00	5.96733	137.942	6.496	136.348	5.729	154.785	6.496	155.225	26.46	979.909	43.6581	8.59421
2019-01-09 11:45:00	5.45667	166.209	6.24033	144.379	5.98467	167.064	4.962	167.894	26.46	979.612	44.1026	10.6596
2019-01-09 12:00:00	5.45667	160.253	5.47333	159.854	5.98467	170.212	4.962	170.945	26.46	979.612	44.6495	10.6707
2019-01-09 12:15:00	5.712	173.31	6.24033	147.012	7.263	154.636	7.00733	172.675	26.46	978.869	44.6829	9.72853
2019-01-09 12:30:00	5.20133	164.347	5.729	159.384	5.21767	173.794	4.70633	177.162	26.46	978.72	45.6733	10.3567
2019-01-09 12:45:00	3.66933	163.003	5.21767	159.089	4.962	182.091	3.68367	158.902	26.46	978.571	45.8096	8.01412
2019-01-09 13:00:00	5.712	173.083	5.47333	174.294	5.729	196.759	6.24033	171.081	26.46	978.422	46.6297	6.65442
2019-01-09 13:15:00	4.18	184.269	3.93933	176.303	2.661	198.939	4.45067	191.494	26.46	977.828	47.3153	4.77374
2019-01-09 13:30:00	4.43533	161.62	4.70633	161.929	4.195	173.752	4.45067	178.829	26.46	977.828	47.3845	7.5966
2019-01-09 13:45:00	6.478	156.299	6.496	148.968	6.496	164.916	6.496	164.964	26.46	977.382	48.4786	5.21343
2019-01-09 14:00:00	3.15867	191.767	4.45067	188.61	4.195	200.701	2.91667	191.254	26.46	977.679	48.547	5.19126
2019-01-09 14:15:00	4.18	181.271	4.45067	178.553	4.962	187.812	4.195	187.812	26.46	977.53	46.7692	2.42751
2019-01-09 14:30:00	2.13733	184.053	3.428	170.156	3.68367	197.967	1.894	196.966	26.46	977.233	47.2479	1.73288
2019-01-09 14:45:00	3.92467	187.251	3.68367	159.244	4.962	174.216	3.68367	178.756	26.46	977.679	45.8803	1.31536
2019-01-09 15:00:00	3.66933	170.823	4.195	165.274	4.45067	167.015	3.68367	180.514	26.46	977.233	46.2906	0.768528
2019-01-09 15:15:00	3.15867	157.641	3.428	153.557	3.17233	153.638	3.428	176.144	26.46	977.233	46.2906	-0.295588
2019-01-09 15:30:00	2.648	159.277	3.68367	158.146	3.68367	165.453	2.40533	190.839	26.46	977.53	46.1538	0.110845
2019-01-09 15:45:00	4.43533	168.699	5.21767	175.16	2.91667	188.984	4.45067	187.593	26.46	977.233	46.2906	0.775918
2019-01-09 16:00:00	3.92467	185.396	3.428	178.822	4.195	184.883	3.93933	191.498	26.46	977.233	46.4957	1.73658
2019-01-09 16:15:00	3.92467	170.139	4.962	162.979	4.70633	166.38	3.93933	177.511	26.46	977.084	47.3846	3.16648
2019-01-09 16:30:00	5.45667	163.646	5.21767	159.611	5.47333	177.511	5.21767	162.426	26.46	977.084	47.6923	5.10258
2019-01-09 16:45:00	6.478	175.632	5.47333	173.11	5.21767	174.631	5.729	171.458	26.46	976.936	47.3846	7.00173
2019-01-09 17:00:00	3.92467	168.724	5.21767	166.641	6.75167	181.71	4.195	171.555	26.46	976.638	47.7949	8.28754
2019-01-09 17:15:00	5.20133	158.715	5.47333	160.148	5.98467	165.99	4.70633	165.746	26.46	976.936	49.8461	8.63485
2019-01-09 17:30:00	5.712	167.503	5.729	159.464	5.98467	183.516	5.729	178.024	26.46	976.638	51.3162	9.62877
2019-01-09 17:45:00	3.92467	168.895	4.70633	188.879	5.47333	185.713	4.195	154.224	26.46	976.638	52.6496	9.18908
2019-01-09 18:00:00	4.69067	187.983	4.962	169.814	5.47333	168.284	4.962	145.021	26.46	976.638	54.4273	10.6596
2019-01-09 18:15:00	4.946	178.659	4.962	175.819	6.24033	184.517	4.962	164.769	26.46	976.638	57.2308	8.22473
2019-01-09 18:30:00	3.15867	179.464	4.195	181.189	4.70633	192.743	3.68367	176.34	26.46	976.638	57.1624	8.61638
2019-01-09 18:45:00	6.73333	167.186	7.263	159.415	7.263	167.186	6.75167	171.995	26.46	976.347	56.2051	10.9367
2019-01-09 19:00:00	5.96733	171.506	4.962	164.053	6.496	167.308	5.98467	174.607	26.46	976.341	57.4359	9.35165
2019-01-09 19:15:00	5.45667	186.738	5.98467	182.971	5.98467	184.297	5.47333	189.839	26.46	976.067	57.4359	9.45141
2019-01-09 19:30:00	7.49933	179.517	7.77433	176.897	7.77433	175.709	7.263	180.42	26.46	976.044	57.7789	10.6781
2019-01-09 19:45:00	6.478	180.1	6.24033	168.619	7.00733	177.317	6.496	186.031	26.46	975.746	57.4019	6.1667
2019-01-09 20:00:00	7.75467	182.174	7.51867	171.328	8.54133	187.349	7.77433	187.08	26.46	976.044	57.641	14.6464
2019-01-09 20:15:00	6.478	158.96	6.24033	159.611	5.47333	161.84	6.75167	161.401	26.46	975.758	70.8376	16.4273
2019-01-09 20:30:00	7.49933	157.179	5.98467	155.901	6.496	155.445	7.51867	160.327	26.46	975.449	79.9321	21.3414
2019-01-09 20:45:00	6.73333	158.784	6.496	141.079	6.75167	151.143	6.496	163.52	26.46	975.468	82.5059	19.7785
2019-01-09 21:00:00	6.73333	162.722	6.75167	180.345	7.51867	199.856	7.00733	184.451	26.46	975.173	83.1594	23.1519
2019-01-09 21:15:00	7.49933	162.136	6.75167	157.639	6.496	168.655	7.51867	163.406	26.46	975.267	82.7834	19.7009
2019-01-09 21:30:00	5.20133	186.435	5.21767	174.736	5.47333	174.496	4.962	189.145	26.46	975.106	82.2734	12.5329
2019-01-09 21:45:00	5.712	154.708	5.98467	151.996	6.496	159.787	5.98467	158.664	26.46	975.118	83.4771	13.9407
2019-01-09 22:00:00	6.22267	174.885	5.98467	144.727	5.729	167.364	5.21767	177.156	26.46	975.205	84.4388	13.5712
2019-01-09 22:15:00	5.20133	183.921	5.729	172.858	5.98467	181.772	4.962	183.188	26.46	975.636	84.1313	14.0367
2019-01-09 22:30:00	5.45667	158.184	8.54133	148.44	8.54133	152.836	5.47333	167.829	26.46	975.405	86.7305	18.4336
2019-01-09 22:45:00	6.478	148.05	8.03	137.94	7.263	129.687	7.00733	160.601	26.46	975.427	88.5773	20.5212
2019-01-09 23:00:00	6.73333	158.159	7.00733	145.314	6.496	151.688	6.75167	159.185	26.46	975.121	89.6717	18.0678
2019-01-09 23:15:00	7.49933	150.614	7.263	142.921	5.98467	135.401	7.51867	151.249	26.46	974.856	91.2449	17.75
2019-01-09 23:30:00	8.26533	143.117	7.263	134.203	7.263	150.199	8.03	146.658	26.46	974.409	91.9973	25.4095
2019-01-09 23:45:00	9.03133	153.544	7.51867	142.994	6.496	151.566	8.797	149.979	26.46	974.261	92.9207	35.2821
2019-01-10	9.28667	150.834	7.77433	139.551	6.24033	153.52	9.564	149.271	26.46	973.665	94.3228	35.574
2019-01-10 00:15:00	8.52067	149.173	7.77433	142.994	6.496	154.057	8.797	145.779	26.46	973.665	94.186	30.8261
2019-01-10 00:30:00	9.28667	149.613	8.797	145.778	7.51867	152.128	9.564	157.207	26.46	973.665	94.9384	32.6477
2019-01-10 00:45:00	7.75467	149.369	6.75167	147.951	6.496	158.135	7.51867	150.37	26.46	973.517	95.3488	37.2367
2019-01-10 01:00:00	10.308	154.521	7.77433	147.072	7.77433	161.554	10.0753	160.699	26.46	973.219	96.0329	43.832
2019-01-10 01:15:00	11.3293	149.54	8.54133	138.136	7.51867	156.768	11.6093	160.016	26.46	973.368	96.1017	41.7037
2019-01-10 01:30:00	9.542	154.155	7.51867	145.827	7.263	160.089	9.30833	156.328	26.46	973.368	96.1699	41.7222
2019-01-10 01:45:00	9.28667	147.465	8.28567	142.727	7.51867	159.43	8.54133	155.157	26.46	973.368	96.0676	39.7233
2019-01-10 02:00:00	8.776	151.104	5.98467	148.808	5.47333	168.588	8.54133	156.867	26.46	973.517	95.829	34.4064
2019-01-10 02:15:00	8.776	155.158	7.00733	159.284	5.98467	151.544	8.28567	156.062	26.46	973.665	95.7607	30.9517
2019-01-10 02:30:00	9.79733	149.205	8.03	142.929	8.28567	148.204	9.30833	149.278	26.46	973.368	95.6956	35.3227
2019-01-10 02:45:00	9.79733	150.224	9.564	139.357	7.77433	141.678	9.81967	156.378	26.46	973.219	95.6914	39.2356
2019-01-10 03:00:00	10.5633	159.016	10.5867	142.605	8.54133	156.208	10.331	162.288	26.46	973.368	95.2131	41.4673
2019-01-10 03:15:00	10.308	160.601	10.0753	142.921	8.797	133.179	10.331	163.336	26.46	973.07	94.8701	40.7283
2019-01-10 03:30:00	10.308	159.087	10.331	144.606	8.797	149.198	10.0753	161.944	26.46	973.07	94.1177	40.0595
2019-01-10 03:45:00	10.0527	149.955	8.28567	139.527	7.00733	155.62	9.05267	159.087	26.46	973.07	93.5705	43.4846
2019-01-10 04:00:00	9.79733	159.551	8.797	142.872	7.77433	159.063	9.30833	162.262	26.46	972.773	94.2203	37.9313
2019-01-10 04:15:00	10.5633	155.84	9.564	147.145	8.28567	154.277	10.331	162.555	26.46	972.773	94.3913	36.9004
2019-01-10 04:30:00	10.5633	156.108	10.331	140.748	8.28567	147.83	10.331	156.67	26.46	972.475	94.4597	32.7601
2019-01-10 04:45:00	9.542	152.421	8.28567	147.023	7.00733	161.431	9.30833	152.861	26.46	972.773	95.2121	33.3349
2019-01-10 05:00:00	9.03133	148.221	7.51867	150.711	7.77433	154.594	8.797	160.406	26.46	972.624	96.0329	37.5803
2019-01-10 05:15:00	8.52067	160.552	8.54133	154.227	6.496	155.791	8.797	155.888	26.46	972.475	96.4091	35.7957
2019-01-10 05:30:00	8.26533	160.943	8.54133	142.457	6.496	150.174	8.28567	174.227	26.46	972.475	96.1355	41.3047
2019-01-10 05:45:00	7.49933	161.627	5.98467	161.211	7.00733	168.757	7.00733	149.784	26.46	972.475	96.0671	38.5003
2019-01-10 06:00:00	9.79733	157.94	7.77433	147.829	6.24033	159.673	9.05267	157.524	26.46	972.475	95.9987	44.0832
2019-01-10 06:15:00	9.28667	157.085	7.51867	158.036	8.03	151.298	9.05267	156.572	26.46	972.326	95.9987	43.178
2019-01-10 06:30:00	9.28667	160.601	7.00733	149.563	6.496	158.867	9.05267	163.336	26.46	972.475	95.9645	44.7889
2019-01-10 06:45:00	8.776	154.887	7.00733	154.227	7.77433	159.747	8.797	163.629	26.46	972.475	96.0329	38.9621
2019-01-10 07:00:00	8.26533	155.424	7.51867	154.544	8.03	163.067	8.03	160.772	26.46	972.773	95.9645	38.8328
2019-01-10 07:15:00	8.52067	159.576	9.05267	151.59	7.51867	162.335	8.797	160.65	26.46	972.773	96.1013	37.5507
2019-01-10 07:30:00	7.49933	151.42	7.00733	145.778	6.496	161.895	7.77433	151.933	26.46	973.07	96.1013	37.3734
2019-01-10 07:45:00	7.75467	152.177	6.75167	152.908	5.98467	168.611	7.263	156.694	26.46	973.07	95.8961	36.2317
2019-01-10 08:00:00	7.49933	159.942	7.00733	144.581	6.496	155.254	7.263	154.643	26.46	973.07	95.9645	31.288
2019-01-10 08:15:00	7.244	152.519	7.263	147.561	6.75167	153.74	7.263	153.398	26.46	973.368	96.1013	33.7487
2019-01-10 08:30:00	6.22267	157.012	6.75167	145.802	8.03	155.766	6.75167	157.915	26.46	973.07	96.1013	33.3312
2019-01-10 08:45:00	6.478	156.548	5.98467	141.724	6.75167	166.828	7.00733	169.807	26.46	973.368	96.1697	31.8865
2019-01-10 09:00:00	6.98867	160.65	6.496	161.455	7.263	155.62	7.00733	167.951	26.46	973.762	96.2039	32.0084
2019-01-10 09:15:00	8.01	158.892	7.51867	149.392	7.00733	160.162	7.77433	158.111	26.46	973.792	96.2381	32.208
2019-01-10 09:30:00	7.75467	158.769	8.28567	148.292	7.00733	147.121	8.54133	160.112	26.46	973.672	96.3058	37.8184
2019-01-10 09:45:00	8.776	148.499	6.24033	153.55	5.47333	153.773	8.03	144.275	26.46	973.913	96.5359	35.223
2019-01-10 10:00:00	8.01	148.637	5.98467	152.71	6.75167	159.575	7.51867	156.401	26.46	973.705	96.5306	37.8648
2019-01-10 10:15:00	7.75467	151.003	6.24033	149.241	7.00733	170.803	7.263	150.906	26.46	973.716	96.7003	33.0873
2019-01-10 10:30:00	8.52067	156.252	7.77433	148.044	8.03	156.618	8.28567	156.814	26.46	973.686	96.5975	38.5927
2019-01-10 10:45:00	6.98867	157.298	7.00733	151.995	8.03	169.969	7.00733	152.049	26.46	973.526	96.766	39.0508
2019-01-10 11:00:00	8.26533	156.116	6.75167	152.912	7.263	156.995	7.51867	157.434	26.46	973.665	96.76	35.4003
2019-01-10 11:15:00	8.26533	169.74	7.51867	159.163	7.00733	172.547	7.263	167.079	26.46	973.665	96.624	29.3814
2019-01-10 11:30:00	8.26533	158.506	7.77433	156.546	8.54133	174.691	8.54133	155.772	26.46	973.367	96.4848	25.4021
2019-01-10 11:45:00	8.52067	158.843	6.24033	152.049	7.51867	157.988	8.03	157.134	26.46	973.077	96.6186	20.8389
2019-01-10 12:00:00	6.73333	154.207	5.98467	149.659	7.00733	172.882	6.24033	149.862	26.46	973.094	96.8593	18.2599
2019-01-10 12:15:00	6.478	147.292	7.263	136.543	7.51867	154.541	6.496	152.32	26.46	972.772	97.0257	16.3423
2019-01-10 12:30:00	6.73333	145.632	6.24033	138.545	6.24033	145.656	6.75167	144.68	26.46	972.478	96.6154	15.5627
2019-01-10 12:45:00	6.73333	154.663	7.263	146.527	7.00733	150.929	7.00733	150.196	26.46	972.475	96.8889	15.5996
2019-01-10 13:00:00	6.73333	156.763	7.51867	133.809	6.496	134.769	6.24033	156.128	26.46	972.475	97.0257	16.4864
2019-01-10 13:15:00	5.45667	157.129	6.496	139.57	8.03	143.776	5.729	158.545	26.46	972.475	96.9573	14.1254
2019-01-10 13:30:00	5.96733	155.786	5.47333	152.288	5.98467	157.715	5.98467	159.765	26.46	972.475	97.1624	15.825
2019-01-10 13:45:00	6.73333	147.267	6.24033	149.163	7.00733	158.838	5.98467	155.982	26.46	972.178	97.0257	16.0984
2019-01-10 14:00:00	3.92467	138.724	4.962	149.31	5.47333	160.864	3.68367	147.023	26.46	972.475	97.1966	14.0182
2019-01-10 14:15:00	5.96733	147.682	5.729	141.791	4.962	156.836	5.98467	143.361	26.46	972.772	97.0599	12.7029
2019-01-10 14:30:00	5.96733	155.542	5.47333	155.119	5.98467	158.349	4.962	177.731	26.46	972.772	97.0599	12.5662
2019-01-10 14:45:00	6.22267	150.611	6.496	141.352	7.00733	142.19	5.98467	160.448	26.46	972.772	97.1622	17.0776
2019-01-10 15:00:00	5.96733	149.389	6.496	145.06	8.03	154.491	5.729	145.337	26.46	972.772	96.9904	21.3303
2019-01-10 15:15:00	6.22267	152.662	5.98467	151.531	6.496	156.665	6.24033	152.686	26.46	972.624	96.7179	22.1284
2019-01-10 15:30:00	7.49933	138.357	6.75167	129.391	6.496	147.755	7.263	139.773	26.46	972.772	96.3419	19.8894
2019-01-10 15:45:00	6.22267	146.925	7.00733	138.911	6.24033	149.879	5.98467	143.874	26.46	972.475	95.2137	18.1195
2019-01-10 16:00:00	6.22267	149.025	6.24033	141.645	5.47333	147.438	5.98467	149.903	26.46	972.475	92.5128	14.5762
2019-01-10 16:15:00	3.414	126.689	4.962	134.224	3.68367	132.645	3.93933	133.866	26.46	972.475	91.8974	12.9393
2019-01-10 16:30:00	5.20133	132.401	5.729	141.523	4.195	157.617	5.21767	122.564	26.46	971.88	91.2137	16.7524
2019-01-10 16:45:00	6.73333	136.649	6.496	133.248	5.98467	143.386	7.00733	136.868	26.46	971.88	91.6923	24.6705
2019-01-10 17:00:00	7.244	151.881	7.77433	148.577	7.51867	157.763	7.00733	146.022	26.46	971.732	92.2393	34.8128
2019-01-10 17:15:00	9.03133	145.9	8.797	144.598	8.797	151.905	8.797	146.339	26.46	971.732	91.7607	31.65
2019-01-10 17:30:00	5.96733	149.147	6.496	146.136	7.263	146.437	5.729	152.076	26.46	971.738	92.1709	31.3508
2019-01-10 17:45:00	7.75467	141.897	7.77433	142.328	7.00733	155.078	8.54133	144.728	26.46	971.882	92.4102	35.1528
2019-01-10 18:00:00	6.73333	143.149	7.00733	146.585	7.00733	165.779	7.00733	145.932	26.46	971.88	92.4836	32.6107
2019-01-10 18:15:00	9.03133	150.045	9.30833	135.171	9.81967	145.211	9.30833	144.771	26.46	971.882	92.2511	36.276
2019-01-10 18:30:00	8.01	153.066	8.03	149.032	8.54133	164.882	7.77433	154.092	26.46	971.881	92.1793	37.4066
2019-01-10 18:45:00	8.52067	148.497	8.797	144.194	8.03	162.241	7.51867	144.152	26.46	972.326	92.3819	30.5231
2019-01-10 19:00:00	6.73333	147.198	8.28567	139.697	6.24033	151.202	6.75167	150.372	26.46	972.34	92.4472	24.8626
2019-01-10 19:15:00	6.22267	155.421	6.75167	153.85	6.75167	168.138	5.98467	146.828	26.46	972.481	92.5131	20.7613
2019-01-10 19:30:00	4.946	150.294	5.47333	142.816	4.45067	144.655	4.962	151.075	26.46	972.475	92.8548	16.4384
2019-01-10 19:45:00	5.712	160.571	8.54133	158.757	7.51867	170.823	6.496	153.15	26.46	972.478	92.9916	32.3373
2019-01-10 20:00:00	9.28667	150.954	9.81967	142.305	8.28567	163.013	9.30833	154.567	26.46	972.475	92.3769	37.1147
2019-01-10 20:15:00	7.75467	154.053	8.54133	147.21	7.263	154.224	8.03	153.223	26.46	972.475	92.4445	32.4851
2019-01-10 20:30:00	8.52067	152.906	9.05267	145.575	8.28567	159.106	8.797	152.808	26.46	972.475	91.9316	39.5792
2019-01-10 20:45:00	8.26533	150.709	8.03	147.284	7.00733	159.399	8.54133	149.562	26.46	972.478	91.6581	32.9506
2019-01-10 21:00:00	8.776	151.881	8.797	146.722	8.03	163.695	8.54133	150.172	26.46	972.475	91.624	28.853
2019-01-10 21:15:00	6.98867	150.758	8.797	143.573	8.28567	150.636	7.77433	152.466	26.46	972.475	92.3077	28.8383
2019-01-10 21:30:00	6.478	154.37	7.00733	151.018	6.24033	159.838	6.75167	158.52	26.46	972.475	92.2393	20.983
2019-01-10 21:45:00	5.45667	154.349	5.47333	152.584	6.24033	157.351	5.21767	153.055	26.46	972.475	91.1469	16.745
2019-01-10 22:00:00	7.75467	149.245	7.00733	145.99	7.263	163.476	7.263	151.564	26.46	972.772	91.2139	27.3308
2019-01-10 22:15:00	7.49933	154.273	7.263	145.16	7.51867	156.421	7.263	158.276	26.46	972.772	92.1026	30.3236
2019-01-10 22:30:00	8.01	148.024	5.98467	142.841	7.263	136.771	8.28567	146.291	26.46	972.772	92.3761	35.3301
2019-01-10 22:45:00	9.03133	154.785	7.00733	152.214	6.496	161.157	8.797	153.321	26.46	972.772	92.8547	38.2601
2019-01-10 23:00:00	7.75467	153.345	6.24033	158.341	7.263	166.38	7.51867	139.041	26.46	972.475	92.9231	32.8546
2019-01-10 23:15:00	8.01	130.253	5.729	157.658	6.496	166.112	7.51867	164.11	26.46	972.772	92.3761	28.3542
2019-01-10 23:30:00	7.75467	153.687	6.75167	136.128	6.24033	161.596	7.263	149.244	26.46	972.475	92.4103	21.6185
2019-01-10 23:45:00	6.98867	151.881	5.729	144.623	5.47333	151.1	6.75167	151.173	26.46	972.475	92.2393	16.0282
2019-01-11	6.478	150.221	6.496	145.16	7.263	150.807	6.24033	151.148	26.46	972.475	91.9658	16.3682
2019-01-11 00:15:00	7.244	154.029	7.00733	143.109	5.98467	149.928	7.263	156.519	26.46	972.326	90.8034	15.7327
2019-01-11 00:30:00	6.478	162.011	4.45067	149.261	4.45067	178.903	6.496	152.662	26.46	972.475	90.3248	17.5653
2019-01-11 00:45:00	6.478	147.877	6.496	138.862	6.496	141.848	7.00733	145.363	26.46	972.178	90.3248	17.1293
2019-01-11 01:00:00	6.73333	149.684	5.98467	145.209	6.75167	146.437	7.00733	156.348	26.46	972.475	89.9829	11.9565
2019-01-11 01:15:00	6.478	152.296	4.70633	157.511	5.21767	143.093	5.98467	152.637	26.46	972.475	90.0513	9.41447
2019-01-11 01:30:00	4.946	149.342	3.428	141.059	4.195	137.747	4.70633	153.028	26.46	972.178	90.4616	3.39187
2019-01-11 01:45:00	5.20133	148.463	4.195	148.48	4.195	168.089	4.70633	158.642	26.46	972.029	90.2564	3.56183
2019-01-11 02:00:00	4.69067	146.657	2.661	130.318	2.40533	161.889	4.70633	151.978	26.46	971.88	90.3248	2.54575
2019-01-11 02:15:00	5.20133	147.706	4.195	135.103	3.17233	147.096	4.962	146.291	26.46	971.88	90.3932	5.46098
2019-01-11 02:30:00	5.96733	153.638	5.47333	148.089	4.70633	138.26	5.98467	152.393	26.46	971.88	90.4616	11.2176
2019-01-11 02:45:00	5.45667	141.042	5.98467	131.783	6.24033	136.234	5.729	138.797	26.46	971.88	90.3248	13.8002
2019-01-11 03:00:00	5.96733	165.355	5.98467	151.507	6.496	145.436	5.729	156.104	26.46	971.286	90.3932	20.2478
2019-01-11 03:15:00	8.01	139.651	7.263	136.763	6.75167	162.89	8.28567	143.313	26.46	971.286	90.7693	22.1912
2019-01-11 03:30:00	7.244	143.581	7.00733	136.641	7.51867	146.852	7.263	143.069	26.46	970.988	90.0513	16.3571
2019-01-11 03:45:00	5.96733	151.344	5.98467	145.257	6.24033	153.296	6.24033	154.859	26.46	971.286	90.4274	18.1602
2019-01-11 04:00:00	7.49933	146.828	5.47333	144.574	6.24033	163.207	7.00733	159.179	26.46	970.988	91.077	24.3638
2019-01-11 04:15:00	10.0527	142.458	8.03	144.086	8.797	162.694	9.564	144.143	26.46	970.393	91.3163	35.9102
2019-01-11 04:30:00	9.79733	153.931	10.5867	144.232	11.098	152.54	9.81967	157.69	26.46	970.245	91.3504	34.9495
2019-01-11 04:45:00	9.03133	146.706	9.81967	144.086	8.54133	154.126	9.30833	151.832	26.46	970.542	91.6581	36.845
2019-01-11 05:00:00	7.49933	137.527	7.263	141.986	5.47333	140.505	7.263	146.12	26.46	970.691	91.4872	38.478
2019-01-11 05:15:00	9.28667	150.538	7.77433	142.719	6.75167	154.419	9.30833	148.903	26.46	970.691	91.6923	31.3988
2019-01-11 05:30:00	8.52067	141.018	7.77433	141.596	8.03	158.105	8.54133	144.46	26.46	970.691	91.9658	23.4105
2019-01-11 05:45:00	8.52067	145.51	9.30833	138.349	9.05267	142.776	7.77433	141.067	26.46	970.542	91.9658	22.9413
2019-01-11 06:00:00	7.49933	141.506	6.24033	143.72	5.98467	152.271	7.51867	146.828	26.46	970.691	92.2393	21.9511
2019-01-11 06:15:00	9.03133	148.439	8.03	138.496	7.263	141.97	9.05267	145.998	26.46	970.691	92.6496	23.4549
2019-01-11 06:30:00	7.49933	139.261	6.496	136.909	7.51867	147.902	8.54133	159.033	26.46	970.691	92.7863	28.9492
2019-01-11 06:45:00	7.49933	143.825	7.51867	139.204	7.263	149.269	7.51867	142.776	26.46	970.393	93.4701	33.4938
2019-01-11 07:00:00	6.478	152.979	5.729	145.55	5.98467	171.287	6.24033	150.807	26.46	970.096	94.359	30.9
2019-01-11 07:15:00	5.712	162.719	5.729	150.115	4.70633	153.956	5.47333	137.259	26.46	970.245	94.9744	30.0169
2019-01-11 07:30:00	4.946	143.484	5.729	149.651	4.70633	171.775	5.47333	149.244	26.46	970.691	95.4872	24.9882
2019-01-11 07:45:00	8.52067	145.29	4.962	141.694	4.962	188.74	8.797	148.317	26.46	970.691	95.9316	25.1139
2019-01-11 08:00:00	7.75467	139.236	6.75167	136.226	5.47333	155.762	7.51867	140.115	26.46	970.691	96.6154	23.0374
2019-01-11 08:15:00	6.73333	143.142	6.496	136.909	6.24033	145.534	6.75167	141.189	26.46	970.691	97.0257	23.3145
2019-01-11 08:30:00	5.712	132.523	6.496	152.239	6.75167	147.292	5.98467	131.01	26.46	970.691	96.9231	29.9541
2019-01-11 08:45:00	5.712	135.77	7.263	138.935	6.24033	155.396	5.21767	128.129	26.46	970.691	96.0684	30.6746
2019-01-11 09:00:00	8.26533	142.77	7.51867	138.954	8.03	139.328	7.51867	128.076	26.46	970.691	94.6631	32.8915
2019-01-11 09:15:00	7.49933	144.785	7.51867	139.112	7.263	147.177	7.51867	125.112	26.46	970.691	93.7669	31.1032
2019-01-11 09:30:00	6.22267	130.426	5.98467	153.405	7.263	151.269	5.729	145.119	26.46	970.988	92.7364	27.1423
2019-01-11 09:45:00	4.43533	138.919	7.51867	139.469	7.51867	144.753	4.962	137.113	26.46	971.286	92.2919	14.4616
2019-01-11 10:00:00	3.414	117.637	2.14967	130.293	1.127	164.058	3.93933	120.957	26.46	971.88	91.6425	5.84155
2019-01-11 10:15:00	4.69067	169.085	4.70633	157.969	4.195	161.739	4.45067	163.618	26.46	972.029	92.497	4.79221
2019-01-11 10:30:00	4.43533	147.632	4.195	143.667	4.195	156.638	4.70633	146.827	26.46	972.178	93.4541	4.28972
2019-01-11 10:45:00	2.90333	147.462	3.93933	130.976	3.93933	138.236	3.428	148.072	26.46	972.326	93.796	9.15213
2019-01-11 11:00:00	5.45667	152.514	4.45067	158.701	4.70633	155.613	5.21767	160.812	26.46	972.178	94.1378	18.8548
2019-01-11 11:15:00	5.45667	141.14	7.00733	141.91	5.98467	134.624	5.729	149.341	26.46	971.88	93.8301	21.3266
2019-01-11 11:30:00	6.22267	143.654	7.00733	140.811	6.24033	158.688	6.24033	145.924	26.46	971.583	94.582	20.2404
2019-01-11 11:45:00	7.49933	157.761	7.77433	139.079	6.496	148.706	7.77433	157.346	26.46	971.434	94.6847	17.5099
2019-01-11 12:00:00	6.22267	161.664	6.496	144.837	6.496	149.705	6.496	153.342	26.46	971.286	94.4442	14.1845
2019-01-11 12:15:00	7.49933	150.292	7.263	139.786	7.263	153.538	7.51867	154.978	26.46	970.988	93.9322	12.7989
2019-01-11 12:30:00	8.01	147.193	6.24033	140.055	6.75167	169.281	7.263	155.955	26.46	970.691	94.377	16.2795
2019-01-11 12:45:00	7.49933	155.612	6.496	146.204	6.75167	148.803	7.00733	157.223	26.46	970.393	94.8209	18.0382
2019-01-11 13:00:00	7.244	153.098	7.51867	144.642	7.51867	150.242	7.263	148.68	26.46	970.245	94.6836	12.762
2019-01-11 13:15:00	7.244	153.27	6.75167	147.133	6.496	152.733	7.00733	154.759	26.46	970.096	95.1974	9.8209
2019-01-11 13:30:00	3.92467	153.636	5.21767	146.401	5.729	154.076	4.195	157.468	26.46	969.947	95.3683	6.77265
2019-01-11 13:45:00	5.96733	145.753	4.70633	145.717	4.45067	161.105	5.47333	153.685	26.46	969.799	95.505	7.75548
2019-01-11 14:00:00	5.20133	149.024	4.962	139.079	3.93933	147.95	5.21767	148.389	26.46	970.096	95.3683	7.33057
2019-01-11 14:15:00	3.414	151.757	4.70633	144.521	4.962	156.736	3.93933	151.318	26.46	970.096	95.0265	7.85155
2019-01-11 14:30:00	3.66933	138.09	4.45067	134.149	3.93933	155.223	4.195	149.682	26.46	970.086	94.001	6.61377
2019-01-11 14:45:00	3.92467	142.092	3.93933	132.196	4.70633	143.825	4.45067	142.483	26.46	970.036	93.8985	6.69137
2019-01-11 15:00:00	4.69067	156.638	5.729	146.791	5.47333	153.758	4.962	149.878	26.46	969.943	94.4454	5.9487
2019-01-11 15:15:00	4.69067	153.783	5.21767	144.131	4.70633	147.462	4.962	146.339	26.46	969.797	94.3087	5.52749
2019-01-11 15:30:00	3.15867	137.455	3.17233	125.509	3.17233	135.161	3.17233	132.647	26.46	969.798	94.1377	1.84003
2019-01-11 15:45:00	2.90333	134.136	3.17233	127.559	2.91667	129.792	3.17233	131.598	26.46	969.798	93.7276	1.70332
2019-01-11 16:00:00	3.92467	149.512	3.68367	143.179	3.93933	160.592	3.93933	152.758	26.46	969.947	93.2832	2.74527
2019-01-11 16:15:00	2.648	143.459	2.40533	140.787	2.91667	158.2	2.40533	130.792	26.46	970.095	92.9755	1.99152
2019-01-11 16:30:00	3.414	140.529	5.21767	133.171	4.45067	140.284	3.68367	141.358	26.46	970.095	93.453	1.55922
2019-01-11 16:45:00	2.648	125.179	2.91667	132.928	2.661	144.679	2.91667	135.307	26.46	970.095	93.0439	0.70941
2019-01-11 17:00:00	2.90333	126.179	2.91667	124.142	3.17233	138.48	2.661	122.176	26.46	970.095	92.2232	0.635513
2019-01-11 17:15:00	3.15867	139.26	2.661	127.021	2.91667	139.162	2.661	137.796	26.46	970.095	91.8811	0.805476
2019-01-11 17:30:00	2.13733	113.682	2.14967	97.196	2.661	114.048	1.63833	122.541	26.46	970.095	91.1623	-0.0406433
2019-01-11 17:45:00	2.648	118.711	2.91667	103.544	2.14967	120.127	2.661	122.274	26.46	970.095	90.7195	0.0443381
2019-01-11 18:00:00	2.39267	114.074	1.894	103.202	2.40533	96.5016	2.14967	121.982	26.46	970.095	89.7624	0.580091
2019-01-11 18:15:00	3.414	122.517	2.661	114.476	2.661	119.686	2.91667	121.687	26.46	970.095	89.7954	0.790697
2019-01-11 18:30:00	2.39267	124.91	1.894	115.429	2.14967	118.858	2.40533	130.377	26.46	970.244	89.3864	1.24886
2019-01-11 18:45:00	2.648	130.963	2.661	129.024	2.40533	144.142	2.661	133.697	26.46	970.095	90.1726	1.38926
2019-01-11 19:00:00	1.882	120.371	2.14967	115.649	1.894	120.81	1.127	122.226	26.46	970.244	90.4461	0.886763
2019-01-11 19:15:00	2.39267	129.792	2.14967	128.828	1.127	137.992	2.661	124.862	26.46	970.095	90.8563	0.997608
2019-01-11 19:30:00	2.13733	143.703	2.14967	142.496	2.14967	158.786	1.894	147.12	26.46	970.095	91.4715	0.147794
2019-01-11 19:45:00	3.15867	154.002	2.91667	142.3	2.661	147.754	2.661	153.758	26.46	970.095	91.9159	-0.158878
2019-01-11 20:00:00	2.90333	144.63	2.40533	139.469	2.40533	146.754	2.40533	141.018	26.46	970.095	92.2919	0.302977
2019-01-11 20:15:00	3.414	134.38	2.40533	134.198	1.894	150.341	3.17233	149.121	26.46	970.393	91.5399	0.177353
2019-01-11 20:30:00	2.90333	178.701	1.894	172.466	1.894	180.068	3.17233	188.854	26.46	970.542	91.8475	0.195827
2019-01-11 20:45:00	3.414	184.73	3.17233	166.023	3.428	184.73	3.17233	189.416	26.46	970.542	91.6083	0.395348
2019-01-11 21:00:00	2.39267	175.114	2.661	162.826	3.17233	167.572	2.40533	165.229	26.46	970.542	90.9246	0.380569
2019-01-11 21:15:00	2.90333	166.694	3.68367	147.279	4.45067	151.757	2.40533	165.766	26.46	970.393	90.7879	0.820256
2019-01-11 21:30:00	4.43533	154.149	3.93933	148.646	3.93933	156.516	4.45067	159.616	26.46	970.542	90.3093	0.439687
2019-01-11 21:45:00	4.69067	193.077	3.68367	173.394	3.93933	171.721	4.45067	193.247	26.46	970.69	91.0613	0.897847
2019-01-11 22:00:00	2.13733	175.48	2.661	168.342	3.93933	169.72	2.40533	164.692	26.46	970.542	91.4715	0.554227
2019-01-11 22:15:00	3.414	157.517	2.661	142.008	3.17233	158.005	3.428	154.49	26.46	970.69	92.5654	0.0849814
2019-01-11 22:30:00	2.648	193.931	4.195	183.107	4.195	192.857	2.91667	189.782	26.46	970.393	92.5995	0.151489
2019-01-11 22:45:00	4.18	180.971	4.195	173.638	4.195	164.253	3.68367	178.189	26.46	970.393	93.3174	-0.0443381
2019-01-11 23:00:00	3.66933	179.165	3.93933	169.562	4.45067	184.974	3.428	170.013	26.46	970.393	93.8985	-0.177353
2019-01-11 23:15:00	3.92467	180.556	4.195	170.685	4.195	179.848	3.93933	179.067	26.46	970.244	93.249	0.0812866
2019-01-11 23:30:00	3.15867	186.218	3.93933	181.838	4.195	191.978	3.428	187.414	26.46	970.393	92.4286	-0.288198
2019-01-11 23:45:00	3.414	201.643	3.17233	185.939	3.68367	193.15	2.91667	201.179	26.46	970.393	93.0439	-0.206911
2019-01-12	2.90333	201.204	2.40533	190.917	3.17233	187.78	2.661	201.96	26.46	970.69	93.3174	-0.373179
2019-01-12 00:15:00	2.90333	214.115	2.14967	198.02	2.91667	175.773	2.40533	210.722	26.46	970.69	93.0439	-0.317757
2019-01-12 00:30:00	2.90333	216.36	2.40533	210.149	1.894	213.675	2.661	207.281	26.46	970.69	92.0184	-0.306672
2019-01-12 00:45:00	1.62667	222.291	1.63833	185.646	2.40533	165.718	1.63833	206.915	26.46	970.839	91.1984	-0.295588
2019-01-12 01:00:00	2.648	210.65	2.661	188.966	2.661	193.419	2.661	209.625	26.46	970.988	90.2416	-0.306672
2019-01-12 01:15:00	2.648	214.924	2.661	193.85	0.375667	227.03	2.661	202.965	26.46	971.285	89.3541	-0.317757
2019-01-12 01:30:00	1.882	211.827	1.894	192.388	1.63833	188.177	1.38267	199.16	26.46	971.136	89.184	-0.321452
2019-01-12 01:45:00	1.882	219.814	1.63833	170.623	3.68367	153.914	2.14967	230.798	26.46	971.136	88.9474	-0.306672
2019-01-12 02:00:00	1.882	211.805	1.894	201.836	1.127	209.364	1.127	200.871	26.46	970.839	88.2622	-0.321452
2019-01-12 02:15:00	2.648	203.018	2.14967	180.284	2.14967	233.087	2.91667	198.307	26.46	970.69	88.2619	-0.306672
2019-01-12 02:30:00	1.116	203.914	1.127	201.098	1.127	209.87	0.751333	198.251	26.46	970.69	88.7483	-0.317757
2019-01-12 02:45:00	0	217.931	0.375667	200.03	0	181.292	0	215.246	26.46	970.69	88.9558	-0.306672
2019-01-12 03:00:00	1.882	201.97	1.894	178.162	1.38267	182.735	1.38267	200.384	26.46	970.542	89.4358	-0.332536
2019-01-12 03:15:00	1.882	198.748	2.40533	193.297	2.661	200.994	2.14967	200.799	26.46	970.69	89.9829	-0.306672
2019-01-12 03:30:00	1.62667	214.957	2.40533	199.351	2.14967	201.873	1.38267	206.145	26.46	970.69	90.3248	-0.343621
2019-01-12 03:45:00	2.90333	193.769	2.661	199.643	2.14967	188.008	2.91667	191.01	26.46	970.393	90.2222	-0.306672
2019-01-12 04:00:00	2.648	190.034	2.40533	194.176	2.661	201.873	2.661	188.008	26.46	970.393	90.8034	-0.317757
2019-01-12 04:15:00	3.92467	172.141	4.45067	168.398	4.195	179.855	4.195	173.386	26.46	970.244	91.0769	-0.0738969
2019-01-12 04:30:00	3.92467	161.913	4.195	157.365	3.68367	186.641	3.93933	163.378	26.46	970.244	91.282	0.158878
2019-01-12 04:45:00	2.648	151.661	3.428	152.117	3.428	146.364	3.17233	162.89	26.46	970.095	91.282	-0.206911
2019-01-12 05:00:00	3.92467	166.893	4.45067	161.71	3.93933	170.115	3.68367	164.061	26.46	970.095	91.7607	-0.210606
2019-01-12 05:15:00	3.414	183.223	3.68367	177.186	3.428	180.05	3.17233	163.915	26.46	970.095	91.7949	0.232775
2019-01-12 05:30:00	4.946	174.704	5.21767	167.617	4.70633	168.48	5.21767	168.138	26.46	970.244	92.1025	1.49272
2019-01-12 05:45:00	3.66933	187.593	3.428	174.745	3.17233	177.414	2.91667	165.721	26.46	970.393	91.7607	0.325146
2019-01-12 06:00:00	3.66933	133.085	3.428	125.827	3.68367	133.817	3.68367	138.333	26.46	970.095	92.0342	0.343621
2019-01-12 06:15:00	3.15867	129.228	2.91667	94.1912	2.40533	114.972	3.428	123.272	26.46	970.095	92.0342	2.6492
2019-01-12 06:30:00	2.90333	108.162	2.661	114.598	2.40533	133.768	2.14967	124.492	26.46	969.959	90.5983	3.83894
2019-01-12 06:45:00	1.62667	108.528	0.375667	94.4841	1.127	108.235	0	112.678	26.46	969.65	84.7179	6.76526
2019-01-12 07:00:00	4.43533	147.78	4.962	128.366	4.195	137.064	4.45067	152.271	26.46	969.799	88.547	10.0906
2019-01-12 07:15:00	2.90333	142.117	4.195	141.059	3.428	151.685	3.428	148.536	26.46	970.096	87.3846	9.50314
2019-01-12 07:30:00	5.45667	144.951	5.98467	141.452	4.45067	149.857	5.47333	151.908	26.46	970.096	88.822	14.9937
2019-01-12 07:45:00	4.946	146.218	4.70633	140.864	4.195	144.875	4.962	161.45	26.46	970.393	88.7522	12.6475
2019-01-12 08:00:00	5.712	136.771	6.24033	133.785	4.45067	149	6.24033	148.829	26.46	970.691	91.077	11.103
2019-01-12 08:15:00	5.712	148.829	5.729	142.816	5.98467	152.589	5.729	147.999	26.46	971.286	91.7265	17.9976
2019-01-12 08:30:00	6.73333	155.103	5.21767	157.072	5.729	167.967	6.24033	156.03	26.46	971.583	92.0684	23.4623
2019-01-12 08:45:00	7.49933	155.884	8.28567	152.947	8.797	163.158	7.00733	156.006	26.46	971.88	91.4188	23.3108
2019-01-12 09:00:00	5.45667	146.011	4.70633	149.15	5.729	173.471	4.962	142.106	26.46	972.178	91.0017	16.2499
2019-01-12 09:15:00	3.15867	140.921	4.70633	131.952	4.962	146.339	3.17233	161.349	26.46	972.475	90.7539	11.9528
2019-01-12 09:30:00	4.18	133.305	3.93933	127.948	3.68367	142.189	4.195	138.821	26.46	972.772	87.6766	9.41816
2019-01-12 09:45:00	2.648	152.238	2.40533	140.341	2.91667	161.024	3.17233	149.773	26.46	973.318	84.5629	7.78873
2019-01-12 10:00:00	2.39267	143.655	3.93933	138.952	4.45067	146.631	3.17233	158.977	26.46	973.516	83.6499	9.50314
2019-01-12 10:15:00	4.18	141.361	4.195	137.512	5.729	156.365	4.45067	150.778	26.46	973.961	84.8112	11.7127
2019-01-12 10:30:00	3.15867	148.286	3.428	143.9	3.428	144.187	3.93933	142.187	26.46	973.656	83.4425	12.3408
2019-01-12 10:45:00	3.92467	138.713	4.70633	127.593	5.47333	153.351	4.195	146.129	26.46	973.959	81.6602	12.6364
2019-01-12 11:00:00	4.43533	152.091	4.45067	151.584	5.729	170.34	4.70633	148.773	26.46	973.663	82.0752	13.5749
2019-01-12 11:15:00	5.45667	164.763	4.962	158.4	5.47333	171.179	5.47333	162.055	26.46	973.644	80.0862	17.1736
2019-01-12 11:30:00	5.712	151.198	7.00733	146.542	7.51867	169.201	5.98467	152.125	26.46	973.333	81.5203	18.3301
2019-01-12 11:45:00	3.15867	141.242	4.962	145.538	4.962	166.563	3.17233	139.68	26.46	973.438	78.3412	21.7183
2019-01-12 12:00:00	5.45667	152.097	5.729	158.17	4.962	166.243	5.47333	158.243	26.46	973.136	72.863	25.0658
2019-01-12 12:15:00	4.18	151.166	5.47333	142.385	6.24033	175.067	4.962	158.239	26.46	973.071	72.6218	23.7135
2019-01-12 12:30:00	6.98867	148.971	7.263	144.702	8.54133	167.165	7.77433	150.288	26.46	972.92	78.1555	27.6781
2019-01-12 12:45:00	6.98867	157.946	8.54133	149.897	7.263	160.921	7.77433	163.677	26.46	972.514	78.5995	24.4266
2019-01-12 13:00:00	5.96733	150.587	6.24033	144.245	6.496	162.514	6.496	144.123	26.46	972.546	78.3637	25.1767
2019-01-12 13:15:00	4.946	139.001	4.962	144.319	3.68367	143.123	5.21767	146.977	26.46	972.575	77.8856	31.9863
2019-01-12 13:30:00	7.244	147.778	8.03	144.193	7.263	168.607	7.00733	146.778	26.46	972.284	78.4986	35.3486
2019-01-12 13:45:00	8.776	139.249	8.797	146.104	5.98467	149.372	7.77433	144.152	26.46	972.386	77.5462	27.4379
2019-01-12 14:00:00	6.478	149.847	6.496	127.798	5.729	153.823	7.00733	144.797	26.46	972.664	76.5956	22.8933
2019-01-12 14:15:00	5.45667	145.125	5.98467	136.517	6.496	149.638	4.70633	147.881	26.46	973.005	75.1661	20.669
2019-01-12 14:30:00	4.69067	150.998	6.24033	149.294	5.729	162.024	4.70633	156.536	26.46	973.037	73.4209	21.1345
2019-01-12 14:45:00	4.946	149.057	5.729	147.961	6.24033	165.595	4.70633	135.935	26.46	973.144	73.7215	17.9015
2019-01-12 15:00:00	3.414	163.267	3.93933	169.734	6.24033	179.318	3.68367	158.12	26.46	973.273	73.6594	16.1428
2019-01-12 15:15:00	5.20133	157.341	6.24033	147.074	5.98467	156.048	5.47333	158.633	26.46	973.272	75.4365	14.5355
2019-01-12 15:30:00	4.69067	148.47	4.962	140.766	5.21767	156.35	4.45067	143.323	26.46	973.065	75.9196	12.5588
2019-01-12 15:45:00	4.69067	154.065	5.47333	146.239	4.45067	172.362	4.70633	152.381	26.46	972.92	75.2058	12.7177
2019-01-12 16:00:00	4.18	152.455	4.70633	147.606	4.962	179.901	5.21767	169.557	26.46	972.474	77.8714	16.4495
2019-01-12 16:15:00	4.43533	153.461	3.428	161.763	4.962	186.74	4.195	144.239	26.46	972.325	79.0703	12.5255
2019-01-12 16:30:00	4.69067	154.804	5.729	141.855	6.496	146.923	4.45067	159.952	26.46	972.177	79.6856	11.2028
2019-01-12 16:45:00	5.712	165.856	6.24033	155.127	4.962	159.415	5.98467	165.953	26.46	972.177	80.4374	20.329
2019-01-12 17:00:00	5.96733	149.561	5.729	141.786	5.729	160.054	5.729	155.954	26.46	971.88	79.6317	27.9293
2019-01-12 17:15:00	8.52067	150.775	8.03	131.873	7.51867	150.726	8.28567	158.731	26.46	971.58	79.8463	42.7641
2019-01-12 17:30:00	8.01	137.016	8.797	127.193	7.51867	137.113	8.28567	154.783	26.46	971.426	80.67	44.9478
2019-01-12 17:45:00	9.79733	143.752	8.54133	132.636	7.77433	136.357	9.81967	146.632	26.46	971.582	82.4474	51.2992
2019-01-12 18:00:00	9.79733	143.898	8.54133	138.884	8.28567	146.632	9.564	148.047	26.46	971.88	83.3361	48.7683
2019-01-12 18:15:00	9.28667	148.144	8.28567	143.446	7.00733	165.252	9.30833	156.051	26.46	971.88	83.4722	41.7111
2019-01-12 18:30:00	8.01	160.519	7.263	156.309	6.75167	158.249	8.797	160.934	26.46	972.028	82.3106	41.2714
2019-01-12 18:45:00	6.478	140.628	8.797	140.86	5.47333	167.279	6.496	155.076	26.46	972.177	79.2343	42.2986
2019-01-12 19:00:00	6.73333	155.247	7.00733	144.887	7.00733	155.345	6.496	169.451	26.46	972.177	78.7216	46.3888
2019-01-12 19:15:00	6.98867	154.613	8.03	150.354	6.24033	149.243	6.75167	158.103	26.46	972.474	80.6016	47.9295
2019-01-12 19:30:00	7.49933	155.392	8.54133	134.855	7.263	160.029	7.51867	160.81	26.46	972.177	82.2415	49.3964
2019-01-12 19:45:00	7.49933	150.901	8.54133	147.96	6.75167	160.785	7.51867	159.589	26.46	972.177	84.7023	41.7481
2019-01-12 20:00:00	8.01	156.394	7.77433	148.939	7.00733	160.104	7.51867	175.284	26.46	972.474	82.55	43.0154
2019-01-12 20:15:00	7.75467	164.424	6.75167	161.044	8.28567	162.715	7.51867	173.625	26.46	972.474	82.6525	41.0756
2019-01-12 20:30:00	8.52067	164.448	9.05267	160.166	9.30833	164.106	8.54133	167.182	26.46	972.474	83.8831	44.2938
2019-01-12 20:45:00	7.244	154.71	8.28567	144.57	8.797	151.22	7.263	161.91	26.46	972.474	85.8315	49.0786
2019-01-12 21:00:00	8.01	143.703	7.263	148.06	8.797	157.761	8.28567	144.606	26.46	972.474	87.9848	48.0929
2019-01-12 21:15:00	8.776	161.201	8.28567	154.16	8.28567	159.102	8.797	167.644	26.46	972.474	90.1035	47.9111
2019-01-12 21:30:00	9.03133	145.655	8.28567	147.474	7.263	166.424	9.564	152.903	26.46	972.474	90.7532	46.6918
2019-01-12 21:45:00	4.69067	136.698	2.91667	148.353	2.40533	150.024	4.70633	151.025	26.46	972.772	93.3174	26.5992
2019-01-12 22:00:00	6.478	154.344	6.496	147.011	5.98467	163.326	5.98467	162.593	26.46	972.474	92.3603	38.3821
2019-01-12 22:15:00	6.98867	158.835	5.729	147.352	6.24033	162.056	7.263	160.909	26.46	972.474	90.4802	33.8263
2019-01-12 22:30:00	6.73333	152.44	6.24033	143.667	5.21767	169.769	6.496	159.909	26.46	972.772	91.1639	24.907
2019-01-12 22:45:00	4.43533	154.295	3.68367	151.404	2.40533	183.778	4.45067	156.004	26.46	973.069	88.737	17.702
2019-01-12 23:00:00	4.43533	155.662	3.68367	146.889	2.91667	159.274	4.195	164.79	26.46	973.069	88.2926	18.186
2019-01-12 23:15:00	3.66933	154.588	4.195	143.374	3.93933	160.69	3.428	185.779	26.46	973.069	85.7973	17.1404
2019-01-12 23:30:00	3.15867	150.683	3.93933	155.04	3.428	155.979	3.68367	174.821	26.46	973.069	89.0104	16.1945
2019-01-12 23:45:00	4.18	169.037	5.21767	148.817	4.195	159.86	3.428	187.512	26.46	973.069	91.1297	15.5738
2019-01-13	3.66933	156.541	4.195	150.647	3.68367	171.013	3.428	167.719	26.46	973.367	90.0359	13.5453
2019-01-13 00:15:00	3.414	160.104	3.428	143.423	3.93933	196.689	3.68367	185.12	26.46	973.367	91.0955	10.9996
2019-01-13 00:30:00	4.69067	182.606	4.195	153.893	3.68367	167.548	4.45067	175.968	26.46	973.218	93.7276	11.1326
2019-01-13 00:45:00	4.18	164.326	3.68367	134.002	3.428	174.65	4.195	165.546	26.46	973.367	93.1806	11.9196
2019-01-13 01:00:00	2.90333	163.35	3.93933	142.008	3.93933	142.8	3.428	163.789	26.46	973.367	94.4112	12.0009
2019-01-13 01:15:00	5.96733	147.779	5.729	138.591	5.729	151.879	5.98467	149.707	26.46	973.515	95.6418	13.9185
2019-01-13 01:30:00	5.45667	149.124	5.98467	143.28	6.75167	153.566	5.729	149.686	26.46	973.664	97.1478	13.4492
2019-01-13 01:45:00	5.45667	144.272	6.24033	139.088	5.47333	147.567	5.98467	143.979	26.46	973.664	97.6981	10.4823
2019-01-13 02:00:00	3.66933	152.851	4.195	129.092	4.45067	144.674	3.68367	145.236	26.46	973.664	98.0818	9.2445
2019-01-13 02:15:00	3.66933	146.504	4.195	135.34	3.93933	153.119	3.428	142.549	26.46	973.813	98.2519	6.32558
2019-01-13 02:30:00	3.414	147.313	3.68367	141.471	3.428	146.044	3.428	145.36	26.46	973.664	98.5964	4.99913
2019-01-13 02:45:00	4.18	146.266	4.45067	140.57	4.45067	138.943	4.45067	142.897	26.46	973.664	98.7347	4.15301
2019-01-13 03:00:00	3.92467	149.391	3.428	145.99	3.68367	156.836	3.428	147.023	26.46	973.664	98.8717	4.06064
2019-01-13 03:15:00	3.15867	152.564	4.45067	140.668	2.14967	157.959	2.91667	150.855	26.46	973.664	99.0085	3.77244
2019-01-13 03:30:00	1.882	171.897	3.17233	153.166	2.661	158.813	1.38267	173.337	26.46	973.664	99.0769	3.49532
2019-01-13 03:45:00	2.648	171.995	3.428	153.557	3.93933	155.884	2.14967	165.819	26.46	973.367	99.1453	3.30319
2019-01-13 04:00:00	3.92467	163.305	3.17233	157.951	2.91667	170.872	3.93933	158.545	26.46	973.367	99.1795	3.92023
2019-01-13 04:15:00	3.15867	166.209	3.68367	171.01	3.93933	170.652	3.68367	161.498	26.46	973.218	99.2478	6.06324
2019-01-13 04:30:00	3.92467	159.082	5.729	150.286	6.24033	156.763	4.195	152.198	26.46	973.069	99.3504	7.15322
2019-01-13 04:45:00	4.69067	153.492	4.45067	150.481	4.70633	161.596	5.21767	148.536	26.46	973.069	99.3846	6.92414
2019-01-13 05:00:00	3.15867	151.392	4.962	142.963	5.21767	155.542	3.68367	150.001	26.46	973.069	99.1453	5.34644
2019-01-13 05:15:00	2.90333	154.517	4.195	146.917	4.70633	157.69	2.91667	149.855	26.46	973.069	98.9402	4.70723
2019-01-13 05:30:00	4.43533	149	5.21767	144.281	5.21767	151.734	5.21767	152.906	26.46	973.367	98.8034	5.62355
2019-01-13 05:45:00	3.66933	145.51	3.68367	131.49	3.428	138.894	3.428	133.353	26.46	973.664	98.735	2.53836
2019-01-13 06:00:00	1.882	145.924	2.14967	143.207	2.14967	133.231	1.63833	154.907	26.46	973.664	98.735	0.210606
2019-01-13 06:15:00	1.37133	167.406	0.375667	135.737	1.894	167.796	0	139.48	26.46	973.664	98.6325	-0.254944
2019-01-13 06:30:00	2.90333	169.358	3.428	158.83	3.17233	153.345	2.661	160.717	26.46	973.961	98.7008	-0.214301
2019-01-13 06:45:00	1.62667	159.106	1.894	149.456	2.91667	144.802	1.127	162.206	26.46	973.961	98.3931	-0.269724
2019-01-13 07:00:00	1.882	156.763	2.14967	148.772	2.40533	155.713	1.63833	161.327	26.46	974.11	98.5299	-0.317757
2019-01-13 07:15:00	1.62667	146.73	2.14967	137.837	2.40533	144.167	1.894	144.777	26.46	974.259	98.2906	-0.317757
2019-01-13 07:30:00	1.116	153.98	1.894	125.314	0.375667	121.417	1.127	144.704	26.46	973.961	98.2564	-0.299282
2019-01-13 07:45:00	0	154.419	1.38267	144.086	0.751333	164.183	0	145.363	26.46	973.961	98.188	-0.277113
2019-01-13 08:00:00	0	64.8825	0	90.6517	0	72.2543	0	100.766	26.46	974.259	98.2564	-0.299282
2019-01-13 08:15:00	0	171.214	1.63833	143.988	1.63833	172.776	0	136.6	26.46	974.556	98.1538	-0.299282
2019-01-13 08:30:00	2.13733	155.493	1.63833	152.678	2.14967	209.001	1.894	145.998	26.46	974.854	98.0855	-0.299282
2019-01-13 08:45:00	0.744	139.895	0.751333	130.514	0.751333	134.696	0	145.29	26.46	974.854	97.9145	-0.328841
2019-01-13 09:00:00	0	136.404	0	129.049	0	134.891	0	155.225	26.46	974.854	97.9829	-0.317757
2019-01-13 09:15:00	0	174.631	1.007	130.611	0	136.893	0	154.761	26.46	975.151	97.9829	-0.317757
2019-01-13 09:30:00	1.37133	138.65	1.127	130.611	1.38267	154.029	1.127	154.883	26.46	975.448	98.0513	-0.277113
2019-01-13 09:45:00	1.37133	141.433	2.14967	130.611	1.894	159.301	1.38267	154.737	26.46	975.448	98.1538	-0.299282
2019-01-13 10:00:00	0.744	144.361	1.894	130.61	1.894	145.63	0.751333	154.662	26.46	975.448	98.1186	-0.299282
2019-01-13 10:15:00	0.744	178.237	1.38267	130.703	1.127	147.676	0.375667	157.196	26.46	976.043	98.2527	-0.288198
2019-01-13 10:30:00	0	141.898	0	130.611	0	120.811	0	150.734	26.46	976.043	98.2406	-0.310367
2019-01-13 10:45:00	0	113.293	0	130.586	0	117.344	0	153.465	26.46	976.192	98.3764	-0.317757
2019-01-13 11:00:00	0	259.193	0	153.332	0	265.221	0	196.42	26.46	976.192	98.7866	-0.321452
2019-01-13 11:15:00	0	181.996	0.375667	153.674	0	170.916	0	148.194	26.46	976.043	98.8549	-0.299282
2019-01-13 11:30:00	0	0.0976241	0.375667	27.2501	0	354.449	0	19.6713	26.46	976.043	98.9231	-0.299282
2019-01-13 11:45:00	0	0.0976241	0.375667	27.2501	0	357.012	0	19.6713	26.46	976.002	98.7865	-0.314062
2019-01-13 12:00:00	0	0.0976241	1.63833	27.2487	0.375667	6.9067	0	23.5755	26.46	975.665	98.5783	-0.299282
2019-01-13 12:15:00	2.13733	18.0577	2.14967	27.2427	1.38267	6.80822	1.38267	8.15035	26.46	975.31	98.5317	-0.317757
2019-01-13 12:30:00	1.882	34.3563	1.63833	27.1911	1.63833	356.934	2.661	11.1755	26.46	975.15	98.6966	-0.314062
2019-01-13 12:45:00	3.66933	27.5975	3.68367	27.1428	2.661	34.4298	3.68367	26.9387	26.46	974.853	98.766	-0.299282
2019-01-13 13:00:00	2.39267	15.5683	2.661	27.1197	1.38267	1.65931	2.661	23.572	26.46	974.704	98.632	-0.299282
2019-01-13 13:15:00	2.39267	8.10138	1.127	27.0954	0	6.66168	1.894	19.4726	26.46	974.556	98.9057	-0.288198
2019-01-13 13:30:00	1.882	19.9097	2.14967	27.0904	1.127	37.8187	1.38267	19.5682	26.46	975.299	98.827	-0.299282
2019-01-13 13:45:00	1.882	11.8573	2.14967	27.0877	1.63833	34.1568	1.38267	13.8091	26.46	975.745	98.8211	-0.328841
2019-01-13 14:00:00	2.90333	9.22171	2.661	27.0356	2.40533	8.48982	2.40533	6.48935	26.46	975.721	98.6092	-0.299282
2019-01-13 14:15:00	2.39267	0.0975795	2.661	27.0333	2.661	22.98	2.661	356.604	26.46	976.042	98.3654	-0.269724
2019-01-13 14:30:00	2.648	18.3413	3.68367	27.0241	2.91667	23.9998	1.894	41.3168	26.46	975.855	98.1752	-0.299282
2019-01-13 14:45:00	2.90333	14.2436	3.428	26.9746	3.68367	22.6824	2.661	20.8288	26.46	975.488	98.3103	-0.166268
2019-01-13 15:00:00	3.15867	16.4882	3.17233	26.9279	3.17233	15.3174	2.40533	26.586	26.46	975.603	97.9048	-0.195827
2019-01-13 15:15:00	2.39267	9.61149	3.428	26.7889	2.91667	16.3688	2.40533	18.6863	26.46	975.439	97.5786	-0.0812866
2019-01-13 15:30:00	3.414	16.6139	2.91667	26.7433	3.93933	20.2977	3.17233	36.0333	26.46	975.298	97.0727	-0.273419
2019-01-13 15:45:00	2.13733	18.8816	1.63833	26.7405	1.38267	17.857	1.63833	43.4472	26.46	975.15	96.8959	-0.325146
2019-01-13 16:00:00	3.15867	5.26952	2.40533	26.6701	2.14967	17.9557	2.40533	34.1548	26.46	974.818	96.1501	-0.299282
2019-01-13 16:15:00	4.18	22.7386	3.428	26.5506	3.17233	18.7861	3.17233	60.3109	26.46	974.553	96.2919	-0.299282
2019-01-13 16:30:00	4.43533	21.5676	3.68367	7.30107	4.195	15.3218	3.93933	47.966	26.46	973.961	96.3267	-0.310367
2019-01-13 16:45:00	4.43533	20.0334	4.45067	15.1621	4.70633	15.1287	4.195	48.1191	26.46	973.515	97.1263	-0.210606
2019-01-13 17:00:00	3.66933	21.3309	3.428	5.28466	3.428	15.7419	2.91667	45.9322	26.46	973.955	97.6926	0.273419
2019-01-13 17:15:00	3.66933	26.1633	3.68367	16.0234	3.428	27.3348	3.428	51.3504	26.46	973.664	98.1029	0.428602
2019-01-13 17:30:00	4.43533	54.3769	3.93933	29.7398	4.195	25.9682	4.195	57.8914	26.46	973.069	98.3084	0.406433
2019-01-13 17:45:00	4.69067	31.8797	4.195	12.4168	3.93933	10.2035	4.195	57.0711	26.46	973.367	98.4614	0.628124
2019-01-13 18:00:00	4.946	34.0767	3.93933	11.953	3.428	16.6234	4.962	51.8474	26.46	973.218	98.2564	0.532058
2019-01-13 18:15:00	4.18	53.4096	3.428	24.0117	4.195	22.2377	4.195	61.9288	26.46	973.218	98.3248	-0.0665072
2019-01-13 18:30:00	3.92467	50.6025	3.93933	26.0866	3.428	21.6275	3.93933	60.1957	26.46	973.37	98.188	-0.0812866
2019-01-13 18:45:00	3.92467	29.8782	3.68367	14.1255	2.91667	21.6275	4.195	45.8425	26.46	973.219	98.1196	0.0443381
2019-01-13 19:00:00	4.69067	35.7854	3.68367	19.9352	3.17233	23.922	4.195	34.2232	26.46	973.232	98.3931	-0.048033
2019-01-13 19:15:00	4.43533	38.3485	4.45067	35.1672	4.195	47.9906	4.195	42.3274	26.46	973.674	99.0769	0.0184742
2019-01-13 19:30:00	4.43533	37.543	3.93933	34.0199	3.93933	43.4503	4.45067	41.9368	26.46	973.665	97.4359	-0.0702021
2019-01-13 19:45:00	5.712	22.9945	4.70633	25.0125	3.68367	26.5584	5.98467	37.6406	26.46	973.962	93.4701	-0.0923711
2019-01-13 20:00:00	4.18	40.1012	4.45067	30.9624	3.68367	25.0907	4.195	44.8606	26.46	974.111	89.3567	-0.133014
2019-01-13 20:15:00	3.92467	50.179	1.894	50.2896	2.661	59.7462	4.195	45.2489	26.46	974.259	77.2518	-0.0775918
2019-01-13 20:30:00	2.39267	60.5271	2.91667	58.3435	2.40533	84.1522	2.40533	52.3755	26.46	974.557	80.4649	-0.336231
2019-01-13 20:45:00	2.39267	78.9293	1.127	73.2801	0	87.7155	2.14967	83.1271	26.46	974.705	77.0467	-0.369485
2019-01-13 21:00:00	0.744	136.137	0.751333	142.789	0.751333	151.171	0	113	26.46	974.705	81.1485	-0.328841
2019-01-13 21:15:00	0.744	146.559	1.63833	161.532	1.63833	157.126	0	136.674	26.46	974.854	88.9421	-0.362095
2019-01-13 21:30:00	1.116	109.046	1.127	141.129	2.14967	131.427	0.751333	135.137	26.46	974.557	92.1552	-0.10715
2019-01-13 21:45:00	3.15867	136.047	1.894	126.494	2.40533	141.295	3.17233	141.515	26.46	974.705	85.6655	-0.048033
2019-01-13 22:00:00	3.414	141.331	3.17233	143.69	2.661	159.931	3.428	127.491	26.46	974.854	86.0144	0.565311
2019-01-13 22:15:00	2.39267	129.228	3.428	138.325	2.661	148.463	2.91667	115.045	26.46	974.854	89.4357	0.990219
2019-01-13 22:30:00	5.96733	148.585	2.91667	164.053	2.661	153.369	5.729	143.337	26.46	974.854	90.3246	2.06542
2019-01-13 22:45:00	5.712	137.771	3.68367	136.177	2.661	149.244	5.98467	131.962	26.46	975.003	94.4957	3.48054
2019-01-13 23:00:00	3.92467	107.356	1.894	104.736	3.428	136.453	3.68367	93.3936	26.46	974.854	95.7949	4.02369
2019-01-13 23:15:00	3.66933	97.641	4.45067	122.458	2.91667	136.356	3.428	100.912	26.46	975.151	89.094	3.32167
2019-01-13 23:30:00	4.43533	96.4205	3.428	121.628	2.14967	145.876	4.195	95.0535	26.46	975.151	90.735	2.56422
2019-01-13 23:45:00	2.90333	116.779	3.17233	117.479	3.17233	140.261	2.91667	122.979	26.46	974.854	85.2649	1.76244
2019-01-14	3.66933	100.424	1.38267	92.458	1.127	103.646	3.428	122.588	26.46	974.854	82.5299	1.2156
2019-01-14 00:15:00	5.20133	111.652	3.68367	69.2439	3.17233	57.3641	4.195	110.847	26.46	974.854	77.7436	1.38187
2019-01-14 00:30:00	5.712	96.5181	4.195	100.294	2.661	100.595	5.47333	99.6671	26.46	975.151	64.3419	2.54575
2019-01-14 00:45:00	3.15867	78.1111	4.195	67.7041	2.91667	91.7562	2.14967	87.2892	26.46	974.854	48.4776	2.80808
2019-01-14 01:00:00	3.92467	82.2976	3.17233	65.3727	3.428	57.4033	3.428	75.3174	26.46	975.151	61.9041	1.63682
2019-01-14 01:15:00	2.648	84.9332	2.91667	82.652	2.40533	76.9036	2.661	99.2596	26.46	975.003	53.1191	1.46685
2019-01-14 01:30:00	3.66933	110.706	1.38267	90.706	0	106.557	3.428	94.2075	26.46	975.449	44.095	1.13432
2019-01-14 01:45:00	3.15867	101.383	1.127	120.237	0	67.5072	2.14967	105.166	26.46	975.449	47.9234	0.912627
2019-01-14 02:00:00	1.116	112.122	2.14967	86.8499	0	156.345	1.127	63.4314	26.46	975.449	45.5991	0.476635
2019-01-14 02:15:00	3.414	121.982	1.63833	109.694	0.751333	105.678	3.17233	94.0367	26.46	975.449	44.7103	0.450771
2019-01-14 02:30:00	2.90333	109.583	2.661	135.662	1.127	151.537	2.14967	115.685	26.46	975.3	48.4362	0.812866
2019-01-14 02:45:00	2.90333	90.6442	1.127	76.8434	0.751333	114.269	2.40533	94.0611	26.46	975.151	46.7613	0.458161
2019-01-14 03:00:00	3.92467	99.6501	3.17233	100.468	1.63833	99.1375	3.428	100.895	26.46	974.854	48.6071	0.883068
2019-01-14 03:15:00	3.66933	108.826	2.661	109.01	1.63833	106.508	3.428	115.001	26.46	974.854	48.1283	1.91762
2019-01-14 03:30:00	5.20133	83.9569	4.195	77.5267	1.38267	40.2212	4.45067	105.361	26.46	974.259	50.3845	2.53836
2019-01-14 03:45:00	3.15867	100.162	5.47333	91.1451	3.428	109.73	2.91667	85.8116	26.46	973.962	50.8972	3.98304
2019-01-14 04:00:00	2.648	85.9093	3.68367	90.0713	3.428	98.4052	1.894	86.0313	26.46	973.655	49.5641	3.91284
2019-01-14 04:15:00	4.18	111.479	2.14967	96.6281	1.38267	112.723	3.68367	128.22	26.46	973.197	48.5351	3.99413
2019-01-14 04:30:00	2.13733	117.38	1.38267	129.495	1.63833	149.593	1.63833	111.206	26.46	973.424	50.6865	1.55183
2019-01-14 04:45:00	1.116	87.8066	0	79.1545	0.751333	197.431	0.751333	93.1755	26.46	973.54	53.1835	0.380569
2019-01-14 05:00:00	1.62667	94.1576	1.38267	117.6	1.127	195.295	1.63833	149.656	26.46	974.211	57.3571	0.217996
2019-01-14 05:15:00	1.37133	127.717	0.375667	129.316	0	194.028	1.38267	89.009	26.46	974.407	60.0239	0.125625
2019-01-14 05:30:00	4.69067	79.3198	3.93933	71.3764	2.91667	55.0601	4.45067	92.4258	26.46	974.259	56.469	0.295588
2019-01-14 05:45:00	3.66933	103.091	3.17233	102.811	2.661	118.076	4.195	104.628	26.46	974.259	56.7421	1.12693
2019-01-14 06:00:00	3.414	109.191	1.38267	109.472	1.894	135.452	3.428	101.455	26.46	974.11	58.3482	1.99522
2019-01-14 06:15:00	5.712	128.547	5.47333	134.246	1.894	157.322	5.21767	134.136	26.46	973.961	61.2545	2.41643
2019-01-14 06:30:00	1.882	91.6936	2.14967	93.1954	0	104.312	1.127	151.025	26.46	973.664	60.229	2.18735
2019-01-14 06:45:00	5.45667	113.195	2.91667	110.817	0	110.56	5.729	124.886	26.46	973.961	63.3054	2.83764
2019-01-14 07:00:00	6.73333	127.912	4.962	127.9	4.45067	129.498	7.00733	132.354	26.46	974.11	68.2274	4.96587
2019-01-14 07:15:00	6.478	127.495	4.195	101.882	2.91667	116.171	5.729	131.595	26.46	974.259	67.9529	6.49184
2019-01-14 07:30:00	4.18	139.7	3.68367	120.335	3.17233	105.58	3.428	143.019	26.46	974.259	71.9191	4.97326
2019-01-14 07:45:00	4.946	129.645	3.68367	120.579	2.661	127.351	4.962	133.062	26.46	974.556	72.6713	5.67159
2019-01-14 08:00:00	3.92467	116.611	3.428	105.349	3.17233	101.236	3.93933	131.035	26.46	974.705	72.4999	6.26276
2019-01-14 08:15:00	5.712	130.548	4.195	126.095	3.68367	140.725	5.47333	132.379	26.46	974.854	71.0989	10.0352
2019-01-14 08:30:00	5.45667	128.986	4.962	120.015	3.17233	129.376	5.21767	146.238	26.46	974.56	73.0676	11.4282
2019-01-14 08:45:00	7.244	132.114	6.24033	125.191	7.51867	111.425	8.03	140.068	26.46	974.556	76.7471	11.018
2019-01-14 09:00:00	6.73333	125.99	4.70633	112.285	4.70633	130.333	6.75167	138.945	26.46	975.15	71.143	7.17539
2019-01-14 09:15:00	3.15867	145.994	3.428	149.611	2.91667	161.511	3.68367	136.845	26.46	975.417	77.361	6.32558
2019-01-14 09:30:00	6.478	124.273	5.21767	126.668	4.195	142.423	5.729	118.247	26.46	975.298	82.5839	11.709
2019-01-14 09:45:00	7.244	112.899	5.729	111.17	5.47333	129.292	7.51867	131.756	26.46	975.15	67.4443	13.5896
2019-01-14 10:00:00	7.49933	124.858	5.47333	126.863	5.729	139.179	7.51867	131.348	26.46	975.446	68.9168	17.3769
2019-01-14 10:15:00	7.49933	136.85	5.729	115.752	5.47333	118.164	6.75167	130.117	26.46	975.621	65.1186	17.5468
2019-01-14 10:30:00	3.15867	138.777	2.14967	120.851	2.91667	167.704	3.428	128.144	26.46	975.478	65.4491	4.45229
2019-01-14 10:45:00	1.62667	134.483	0	185.798	0	247.357	1.38267	105.85	26.46	976.041	69.2058	1.8659
2019-01-14 11:00:00	3.66933	122.201	0.375667	94.6429	0.751333	171.452	3.68367	145.973	26.46	976.159	69.3889	1.42991
2019-01-14 11:15:00	4.69067	127.83	3.93933	127.798	3.17233	133.998	4.70633	131.633	26.46	975.744	71.2993	3.41034
2019-01-14 11:30:00	5.45667	124.197	6.75167	129.456	5.47333	145.653	5.47333	122.759	26.46	975.445	71.7774	5.53857
2019-01-14 11:45:00	5.96733	134.413	3.93933	132.723	5.21767	148.383	6.24033	135.973	26.46	975.148	69.3188	7.32318
2019-01-14 12:00:00	7.49933	138.582	5.47333	126.628	5.47333	166.498	7.00733	147.944	26.46	974.999	64.4016	8.37991
2019-01-14 12:15:00	5.712	127.44	4.45067	135.527	4.195	156.892	5.729	146.555	26.46	974.851	63.8552	9.15213
2019-01-14 12:30:00	4.946	128.415	4.962	126.628	3.68367	143.897	4.962	135.266	26.46	975.148	62.3528	3.60617
2019-01-14 12:45:00	3.66933	120.199	3.68367	125.823	4.70633	148.603	2.661	122.881	26.46	974.851	57.9819	1.5038
2019-01-14 13:00:00	3.15867	139.679	3.428	140.306	2.91667	132.097	3.17233	135.9	26.46	975.148	52.5184	0.325146
2019-01-14 13:15:00	2.90333	162.426	1.63833	130.748	1.38267	163.694	2.91667	154.673	26.46	975.148	56.0011	0.0628124
2019-01-14 13:30:00	0.372	189.925	1.894	242.555	1.63833	228.252	0.751333	188.95	26.46	975.148	59.0736	-0.258639
2019-01-14 13:45:00	1.62667	137.39	2.14967	170.435	2.14967	172.347	1.38267	150.651	26.46	975.296	57.7679	-0.291893
2019-01-14 14:00:00	2.90333	150.284	3.428	193.298	2.91667	211.251	3.17233	135.414	26.46	975.119	60.5668	-0.0295588
2019-01-14 14:15:00	2.13733	156.44	2.40533	156.747	3.68367	199.005	2.40533	161.974	26.46	974.999	63.3033	0.0406433
2019-01-14 14:30:00	4.69067	147.237	4.45067	144.28	3.93933	138.68	4.70633	155.234	26.46	974.702	60.9868	0.665072
2019-01-14 14:45:00	4.18	141.386	3.68367	142.5	3.93933	149.505	3.93933	143.141	26.46	974.212	66.2797	1.29689
2019-01-14 15:00:00	2.90333	144.767	3.428	148.716	2.661	165.936	2.91667	148.376	26.46	974.257	62.3021	1.95457
2019-01-14 15:15:00	3.15867	138.629	3.17233	141.409	2.14967	167.75	3.428	147.922	26.46	973.96	57.8651	2.13193
2019-01-14 15:30:00	3.414	137.971	2.91667	134.483	2.14967	164.214	3.68367	151.166	26.46	973.514	59.3681	1.66268
2019-01-14 15:45:00	3.66933	144.19	2.661	145.58	2.661	164.092	2.91667	133.605	26.46	973.068	67.088	3.44729
2019-01-14 16:00:00	5.20133	142.678	3.93933	133.8	3.93933	147.897	4.962	142.824	26.46	972.474	68.5226	7.67419
2019-01-14 16:15:00	5.96733	149.497	3.428	135.546	3.93933	156.082	5.98467	151.106	26.46	972.24	67.2308	11.9454
2019-01-14 16:30:00	3.15867	142.67	4.70633	151.702	4.70633	164.651	3.17233	145.866	26.46	972.172	64.1686	11.188
2019-01-14 16:45:00	3.92467	143.643	4.195	129.059	2.91667	148.937	3.93933	133.836	26.46	972.165	62.8689	19.9522
2019-01-14 17:00:00	5.45667	154.384	4.70633	151.12	5.729	164.069	5.21767	155.262	26.46	971.85	71.9606	23.3293
2019-01-14 17:15:00	5.20133	151.217	4.70633	146.051	4.70633	154.364	5.47333	150.558	26.46	971.879	75.1068	17.314
2019-01-14 17:30:00	5.20133	155.023	4.70633	153.761	4.195	163.416	5.47333	152.949	26.46	971.88	77.2937	13.4973
2019-01-14 17:45:00	4.69067	155.67	4.962	147.699	4.45067	163.331	4.70633	153.888	26.46	971.88	70.5334	8.87871
2019-01-14 18:00:00	3.66933	152.41	2.40533	189.119	2.91667	194.576	3.428	154.85	26.46	972.177	65.0017	7.46359
2019-01-14 18:15:00	3.414	152.048	2.91667	148.08	2.91667	155.44	3.17233	153.366	26.46	972.474	64.1149	7.10888
2019-01-14 18:30:00	2.648	181.501	2.661	226.8	2.661	226.937	2.40533	174.424	26.46	972.475	63.3628	9.15583
2019-01-14 18:45:00	4.946	158.954	4.70633	154.571	3.428	157.88	5.21767	172.643	26.46	972.772	68.4209	8.23581
2019-01-14 19:00:00	4.946	163.255	4.70633	152.919	3.428	163.548	4.962	176.872	26.46	972.797	69.0388	8.64224
2019-01-14 19:15:00	4.946	167.971	4.962	154.072	4.962	168.874	4.962	173.218	26.46	972.961	72.9377	8.0252
2019-01-14 19:30:00	5.712	157.779	4.962	156.253	3.93933	161.952	5.47333	176.375	26.46	973.378	70.5491	6.61008
2019-01-14 19:45:00	5.712	167.177	4.962	158.989	3.428	166.665	5.47333	170.106	26.46	973.405	72.9429	14.4875
2019-01-14 20:00:00	7.244	167.084	6.24033	157.481	5.98467	167.621	7.00733	166.376	26.46	973.294	78.072	22.3058
2019-01-14 20:15:00	7.75467	181.044	5.47333	157.945	5.98467	165.327	7.00733	178.604	26.46	973.648	79.8154	16.5862
2019-01-14 20:30:00	7.244	164.936	7.51867	161.776	5.98467	162.3	7.51867	169.94	26.46	973.66	84.9086	19.4903
2019-01-14 20:45:00	5.96733	162.74	6.75167	155.431	6.24033	172.649	5.98467	167.621	26.46	973.664	87.1646	19.3832
2019-01-14 21:00:00	4.43533	168.109	4.962	151.965	4.195	159.567	4.45067	178.164	26.46	974.259	88.9421	9.08193
2019-01-14 21:15:00	5.20133	179.263	4.195	169.782	3.68367	173.552	4.45067	177.335	26.46	974.407	89.865	3.56922
2019-01-14 21:30:00	3.66933	170.379	4.195	159.97	3.428	150.049	3.68367	170.208	26.46	974.556	89.8308	0.886763
2019-01-14 21:45:00	3.66933	178.042	2.661	151.868	3.428	158.054	3.428	182.655	26.46	974.556	90.6512	0.3584
2019-01-14 22:00:00	3.92467	172.694	4.195	168.289	3.93933	167.569	3.68367	183.359	26.46	974.705	89.9658	0.443381
2019-01-14 22:15:00	2.90333	187.972	2.14967	177.247	2.661	186.654	2.91667	187.753	26.46	974.854	91.4699	-0.280808
2019-01-14 22:30:00	2.648	255.58	2.14967	241.292	1.63833	238.643	2.661	252.042	26.46	975.448	92.7705	-0.306672
2019-01-14 22:45:00	3.15867	320.94	3.17233	319.025	3.17233	323.942	3.17233	291.043	26.46	976.043	93.5566	4.28233
2019-01-14 23:00:00	3.66933	341.856	2.661	17.5838	1.894	337.634	3.428	317.987	26.46	976.043	95.9494	23.0669
2019-01-14 23:15:00	4.18	352.888	3.93933	18.9033	2.661	356.817	4.195	347.86	26.46	976.043	96.5989	25.5129
2019-01-14 23:30:00	8.776	351.716	2.661	5.23589	3.68367	63.4558	8.03	346.859	26.46	975.746	97.6927	40.5435
2019-01-14 23:45:00	5.96733	15.1579	3.68367	35.8231	5.729	34.8314	4.70633	22.4806	26.46	975.448	98.2508	43.7987
2019-01-15	6.73333	33.9788	5.98467	3.9626	5.729	10.0569	8.03	356.069	26.46	975.448	98.3923	27.0908
2019-01-15 00:15:00	9.03133	344.891	4.962	13.336	8.28567	8.34826	9.30833	337.445	26.46	975.448	98.3926	37.08
2019-01-15 00:30:00	6.73333	0.195282	7.00733	2.15611	7.51867	16.0864	8.03	25.1914	26.46	975.151	98.188	36.228
2019-01-15 00:45:00	8.01	3.90564	4.962	6.09456	5.47333	43.5967	7.51867	109.309	26.46	975.448	98.0855	49.6402
2019-01-15 01:00:00	9.03133	10.7893	6.75167	7.8681	8.28567	20.0652	7.263	1.02523	26.46	975.448	97.5384	50.4014
2019-01-15 01:15:00	10.0527	7.34749	10.8423	4.38584	7.51867	39.0564	9.81967	14.9635	26.46	975.3	97.1966	44.885
2019-01-15 01:30:00	6.98867	20.8708	7.51867	15.1508	6.496	20.4802	7.51867	3.17333	26.46	975.597	97.0256	52.0123
2019-01-15 01:45:00	12.0953	10.057	10.8423	5.04492	9.05267	4.76	12.1207	14.5241	26.46	975.894	97.5726	68.5156
2019-01-15 02:00:00	11.3293	3.12451	13.1433	14.0035	13.399	20.6267	10.8423	10.3744	26.46	975.448	97.1624	80.4885
2019-01-15 02:15:00	16.6913	12.3028	15.7	7.94974	11.3537	16.306	17.4897	21.6519	26.46	975.448	94.1538	81.6967
2019-01-15 02:30:00	14.3933	13.3036	13.6547	3.3362	9.81967	5.712	13.9103	12.6445	26.46	975.746	88.8889	80.6141
2019-01-15 02:45:00	15.9253	18.3809	15.4443	13.0759	11.6093	38.5194	15.4443	25.2158	26.46	975.746	81.7436	86.5111
2019-01-15 03:00:00	18.734	10.7893	14.166	3.0921	12.632	3.51508	18.2567	10.9602	26.46	975.472	60.6496	88.5691
2019-01-15 03:15:00	19.7553	12.1807	17.7453	2.79077	14.4217	12.3028	18.5123	20.6999	26.46	975.003	45.2308	87.6306
2019-01-15 03:30:00	18.734	20.7731	18.768	12.1971	17.7453	1.92841	18.001	18.3321	26.46	974.854	46.7008	88.51
2019-01-15 03:45:00	17.7127	5.39467	15.9557	7.73005	15.9557	2.95364	17.4897	11.009	26.46	975.167	45.8803	89.4042
2019-01-15 04:00:00	12.606	178.097	16.467	8.87733	13.9103	27.6324	14.4217	0	26.46	975.449	43.6239	89.6556
2019-01-15 04:15:00	19.2447	8.12879	18.001	9.53704	11.865	26.7542	19.0237	14.8173	26.46	975.3	39.2487	91.3329
2019-01-15 04:30:00	14.904	0.878891	13.6547	0.605116	11.098	18.5055	14.6773	8.61802	26.46	975.598	39.014	90.9893
2019-01-15 04:45:00	11.3293	9.86343	11.098	2.5681	12.632	14.136	11.6093	5.39559	26.46	976.055	40.6907	88.0482
2019-01-15 05:00:00	16.1807	3.02739	14.933	0.0198269	11.098	8.78919	15.9557	13.0861	26.46	975.868	35.6984	87.8132
2019-01-15 05:15:00	13.6273	42.6308	11.865	11.204	14.166	37.6255	12.1207	348.933	26.46	976.28	31.1188	87.6159
2019-01-15 05:30:00	15.4147	3.34535	12.3763	3.37095	12.8877	5.15232	14.933	13.7477	26.46	976.715	31.3953	81.2919
2019-01-15 05:45:00	15.1593	356.902	13.399	11.5267	13.399	1.41628	15.9557	1.17209	26.46	976.189	29.617	87.2353
2019-01-15 06:00:00	15.67	1.00116	14.933	9.30232	14.166	7.52093	14.6773	0.219767	26.46	976.641	27.4282	89.9679
2019-01-15 06:15:00	15.4147	0.219767	15.7	5.9593	15.7	4.07791	13.9103	2.93023	26.46	976.79	28.6252	88.9771
2019-01-15 06:30:00	12.8613	0.122107	15.4443	20.1489	14.4217	15.3855	13.1433	0.219793	26.46	976.641	29.552	88.329
2019-01-15 06:45:00	13.372	13.3593	15.9557	13.3859	11.6093	55.2687	11.098	8.42586	26.46	977.236	28.8695	86.2957
2019-01-15 07:00:00	9.542	1.90498	10.5867	22.4224	8.797	356.524	9.564	0.195382	26.46	978.129	27.3645	86.3604
2019-01-15 07:15:00	10.0527	4.98225	11.865	2.44002	11.6093	25.937	9.81967	0.610569	26.46	978.427	26.8172	86.6626
2019-01-15 07:30:00	14.3933	5.27549	13.399	2.95815	10.0753	3.51699	14.166	8.0842	26.46	978.575	25.5866	83.6624
2019-01-15 07:45:00	14.3933	89.0324	12.1207	6.15051	10.8423	17.147	11.3537	3.44405	26.46	978.873	26.4101	88.357
2019-01-15 08:00:00	13.372	352.719	10.5867	5.63721	11.3537	18.0023	13.399	0.928207	26.46	979.022	29.216	88.3142
2019-01-15 08:15:00	13.8827	1.31891	9.81967	13.4614	11.6093	16.3155	13.399	89.906	26.46	979.319	28.1188	85.532
2019-01-15 08:30:00	15.4147	6.78954	13.399	3.8855	11.6093	23.5436	15.4443	13.1639	26.46	979.617	26.954	85.4602
2019-01-15 08:45:00	12.8613	354.668	11.6093	4.15413	11.6093	6.81396	12.1207	177.993	26.46	979.766	27.1592	88.4213
2019-01-15 09:00:00	18.4787	7.03376	19.535	6.18122	16.9783	21.9317	18.5123	9.76911	26.46	979.319	26.5435	88.2181
2019-01-15 09:15:00	11.5847	3.9809	12.1207	0.515078	14.4217	18.1949	11.098	356.767	26.46	979.915	27.2276	88.1184
2019-01-15 09:30:00	13.6273	354.032	11.3537	8.37639	10.8423	1.75819	14.6773	356.791	26.46	980.51	26.2662	84.5972
2019-01-15 09:45:00	11.5847	4.88377	14.4217	0.145533	14.4217	24.8095	11.098	346.43	26.46	980.658	25.5816	85.7611
2019-01-15 10:00:00	15.9253	348.795	12.3763	14.8721	13.399	34.9186	15.1887	350.92	26.46	980.807	24.3502	83.5922
2019-01-15 10:15:00	15.9253	0.0976744	14.166	1.00001	12.8877	4.56628	14.6773	3.24768	26.46	981.105	23.6662	81.9582
2019-01-15 10:30:00	11.84	181.772	12.632	8.88722	13.6547	26.2988	12.3763	0.146512	26.46	981.402	23.9398	80.2611
2019-01-15 10:45:00	15.4147	14.5047	11.098	14.5523	15.1887	12.1849	14.166	0.195349	26.46	980.956	24.4186	78.834
2019-01-15 11:00:00	10.308	353.533	12.1207	5.39536	10.8423	3.41861	8.797	4.81047	26.46	981.402	24.4186	82.251
2019-01-15 11:15:00	10.0527	1.97791	12.632	4.63838	8.797	23.1733	9.81967	177.865	26.46	981.399	24.0766	81.7669
2019-01-15 11:30:00	10.308	350.529	12.632	24.6128	9.564	39.7047	8.797	335.976	26.46	981.797	23.0506	72.1372
2019-01-15 11:45:00	9.542	3.85753	8.28567	14.2051	11.6093	17.1636	9.30833	21.4117	26.46	981.336	20.4482	79.3911
2019-01-15 12:00:00	12.3507	357.048	9.81967	3.30113	9.30833	14.4284	11.3537	352.288	26.46	981.116	20.2421	78.0035
2019-01-15 12:15:00	12.3507	341.671	10.5867	17.9824	5.21767	48.6741	12.1207	0	26.46	981.099	19.2137	77.6102
2019-01-15 12:30:00	8.776	356.878	12.3763	16.7863	8.54133	13.7186	6.496	3.88123	26.46	980.504	20.1026	79.7939
2019-01-15 12:45:00	10.5633	345.69	7.263	18.1062	3.93933	342.394	8.54133	341.589	26.46	980.832	19.8984	77.6628
2019-01-15 13:00:00	8.776	0.219695	13.1433	5.97281	9.564	17.8197	8.797	12.2053	26.46	980.504	19.043	71.7391
2019-01-15 13:15:00	13.8827	356.39	8.03	28.7961	9.564	24.3126	12.632	343.965	26.46	980.802	19.2821	66.621
2019-01-15 13:30:00	7.75467	83.9957	8.28567	14.3368	9.05267	2.3678	6.75167	1.02523	26.46	980.802	19.4188	57.6117
2019-01-15 13:45:00	7.49933	6.29785	9.05267	6.28985	7.00733	19.455	4.45067	0.219692	26.46	980.814	20.3761	61.5397
2019-01-15 14:00:00	6.73333	14.4997	7.263	17.6406	8.28567	55.5578	4.195	3.68595	26.46	980.207	20.5812	64.599
2019-01-15 14:15:00	12.8613	337.301	11.865	336.829	8.797	40.8628	11.865	343.013	26.46	980.207	20.1709	59.7744
2019-01-15 14:30:00	5.20133	10.0083	8.797	23.2556	6.496	24.0444	3.93933	350.121	26.46	980.504	20.1712	56.6774
2019-01-15 14:45:00	8.776	2.95392	7.263	30.9978	8.28567	3.00274	8.28567	5.81018	26.46	980.207	20.7883	54.3623
2019-01-15 15:00:00	6.22267	7.71495	7.77433	16.9634	8.54133	23.1937	6.75167	356.597	26.46	980.711	20.7899	53.3917
2019-01-15 15:15:00	6.22267	15.1369	8.54133	14.9615	8.28567	30.0053	4.962	341.997	26.46	980.881	21.1318	46.459
2019-01-15 15:30:00	7.75467	5.22469	5.729	25.5817	6.75167	44.1169	6.75167	348.614	26.46	980.962	21.1318	42.5942
2019-01-15 15:45:00	7.49933	14.5266	9.81967	3.07163	8.797	11.1574	6.24033	32.3491	26.46	980.826	20.7899	35.6205
2019-01-15 16:00:00	7.49933	15.1369	4.962	4.42364	6.75167	25.0003	5.729	0.927746	26.46	980.804	21.4053	33.4494
2019-01-15 16:15:00	4.69067	4.63882	6.75167	9.93258	5.729	89.2118	4.195	3.22276	26.46	980.922	21.4057	27.8185
2019-01-15 16:30:00	5.96733	353.625	7.263	13.6268	6.496	14.187	3.68367	347.447	26.46	980.532	20.9299	25.7863
2019-01-15 16:45:00	4.946	1.8314	6.496	5.32442	5.47333	267.677	4.195	3.44302	26.46	980.357	21.2038	19.9411
2019-01-15 17:00:00	4.946	4.17558	6.496	4.93139	3.93933	27.6419	3.17233	0.830233	26.46	980.212	20.896	16.0467
2019-01-15 17:15:00	4.946	356.028	4.195	4.22526	3.68367	44.6165	4.195	1.75828	26.46	980.212	21.1714	11.3616
2019-01-15 17:30:00	4.43533	356.913	4.45067	0.808149	3.428	4.8357	4.70633	356.791	26.46	980.212	20.9337	8.89349
2019-01-15 17:45:00	6.22267	354.033	5.47333	17.167	4.195	2.51555	4.195	355.84	26.46	980.212	20.8996	8.94153
2019-01-15 18:00:00	3.414	86.1147	4.45067	17.9729	3.93933	32.3358	2.40533	356.817	26.46	980.212	21.2075	10.4084
2019-01-15 18:15:00	4.946	348.783	5.729	11.6957	3.68367	7.81586	4.45067	92.0561	26.46	980.212	21.7563	10.7446
2019-01-15 18:30:00	5.96733	341.674	3.68367	17.6551	3.68367	355.645	4.70633	349.832	26.46	980.212	22.1683	12.0046
2019-01-15 18:45:00	5.20133	0.0977077	5.47333	17.5329	4.70633	23.7918	3.93933	5.0808	26.46	980.212	21.6216	11.9491
2019-01-15 19:00:00	4.43533	1.95416	2.91667	2.75457	2.14967	10.7723	3.17233	4.95867	26.46	980.212	21.8269	11.369
2019-01-15 19:15:00	4.946	354.777	5.21767	15.7986	3.93933	357.024	3.17233	10.7723	26.46	980.212	21.8953	10.9922
2019-01-15 19:30:00	4.69067	13.2638	5.729	3.35217	3.68367	20.2499	2.91667	7.42579	26.46	980.212	20.9374	10.0869
2019-01-15 19:45:00	6.478	10.1128	5.98467	10.5093	3.428	0.268697	4.70633	16.5615	26.46	980.212	21.4506	9.92805
2019-01-15 20:00:00	4.946	17.2943	3.428	9.21464	3.68367	11.3585	2.661	20.7141	26.46	980.212	21.4506	7.23451
2019-01-15 20:15:00	5.96733	6.13117	6.24033	11.7306	4.45067	17.6851	3.17233	10.4792	26.46	980.212	21.2795	7.3823
2019-01-15 20:30:00	6.98867	6.69299	5.98467	8.18871	3.93933	12.2379	4.45067	16.2684	26.46	980.212	20.9374	6.7357
2019-01-15 20:45:00	5.45667	7.13267	3.17233	6.12549	3.17233	10.4059	3.93933	5.15409	26.46	980.212	20.5269	5.80091
2019-01-15 21:00:00	5.45667	14.5829	5.21767	4.62237	3.17233	40.793	2.91667	18.0759	26.46	980.212	20.8005	5.95609
2019-01-15 21:15:00	4.946	13.7524	4.195	4.62237	2.661	7.5235	2.661	11.8226	26.46	980.212	20.8005	5.24299
2019-01-15 21:30:00	3.414	2.05186	3.428	7.61553	2.91667	0.146562	3.17233	356.829	26.46	980.212	20.6637	4.24168
2019-01-15 21:45:00	4.69067	18.2714	3.93933	7.99329	2.661	18.9553	3.17233	21.2759	26.46	980.212	21.1427	2.48294
2019-01-15 22:00:00	5.712	2.14957	4.195	8.47048	3.68367	27.3093	3.68367	11.8715	26.46	980.212	20.5953	2.57161
2019-01-15 22:15:00	4.43533	20.5675	2.91667	27.0463	1.894	29.1169	2.661	21.3003	26.46	980.212	20.1163	0.469245
2019-01-15 22:30:00	4.69067	24.4758	3.93933	18.0083	2.91667	27.2605	3.428	25.0865	26.46	980.212	20.3216	1.05303
2019-01-15 22:45:00	4.18	21.6423	3.68367	24.4326	3.17233	28.6772	2.14967	31.8039	26.46	979.915	20.0479	0.0665072
2019-01-15 23:00:00	3.66933	36.2985	3.17233	47.2718	0	74.4534	1.894	38.1061	26.46	980.063	19.2268	-0.166268
2019-01-15 23:15:00	4.69067	25.3063	4.195	14.0023	3.68367	23.1323	3.428	41.6235	26.46	979.617	17.7557	0.12193
2019-01-15 23:30:00	4.946	28.9704	3.93933	26.8753	3.17233	30.0452	2.661	33.9046	26.46	979.319	19.0558	1.54445
2019-01-15 23:45:00	5.712	31.1199	4.962	22.4052	4.195	40.5976	2.91667	35.2725	26.46	979.022	18.6794	1.51489
2019-01-16	4.946	21.398	3.93933	15.7611	2.91667	23.572	2.661	31.1199	26.46	979.022	18.0636	0.476635
2019-01-16 00:15:00	5.20133	24.6224	4.45067	16.8358	3.17233	26.0391	3.428	28.433	26.46	978.724	18.4742	0.816561
2019-01-16 00:30:00	4.43533	19.5416	4.70633	16.6404	3.68367	14.8272	1.63833	25.5994	26.46	978.427	17.9952	0.373179
2019-01-16 00:45:00	2.648	33.2207	1.894	18.2526	0	47.9745	1.127	33.7336	26.46	978.427	17.7215	-0.0849814
2019-01-16 01:00:00	3.92467	37.2755	3.68367	37.4033	2.14967	41.8189	1.894	48.8051	26.46	977.98	17.9952	-0.0369485
2019-01-16 01:15:00	2.90333	37.2755	2.661	33.9347	2.14967	39.6694	1.38267	37.5198	26.46	977.831	17.3794	-0.0849815
2019-01-16 01:30:00	2.90333	33.4649	2.661	36.8171	1.894	40.5976	1.127	42.796	26.46	977.831	17.1057	-0.199522
2019-01-16 01:45:00	2.90333	38.5946	2.91667	29.9776	2.14967	21.9843	1.63833	42.1609	26.46	977.831	17.3794	-0.11454
2019-01-16 02:00:00	2.90333	34.1977	2.661	30.5638	1.63833	26.1368	0	35.6145	26.46	977.534	17.9268	-0.103456
2019-01-16 02:15:00	2.39267	33.4161	1.63833	38.869	0	53.2996	1.127	37.7152	26.46	977.534	17.1741	-0.214301
2019-01-16 02:30:00	0	2.24728	0	38.4781	0	53.2996	0	23.1079	26.46	977.534	16.4899	-0.288198
2019-01-16 02:45:00	0	234.817	1.127	38.5273	0	164.296	0.375667	316.282	26.46	977.534	17.1742	-0.380569
2019-01-16 03:00:00	0	208.145	1.127	194.227	0	172.212	0	223.851	26.46	977.236	20.0481	-0.384264
2019-01-16 03:15:00	0	208.069	1.127	193.785	0.751333	172.21	0	347.059	26.46	976.79	19.2953	-0.373179
2019-01-16 03:30:00	0.744	170.647	1.63833	175.171	1.127	172.21	1.127	128.926	26.46	976.344	20.1163	-0.413823
2019-01-16 03:45:00	2.648	97.9522	1.63833	115.423	0.751333	170.427	1.63833	103.766	26.46	976.195	16.6268	-0.402738
2019-01-16 04:00:00	3.66933	91.308	3.428	82.8375	0	168.986	3.93933	95.6071	26.46	975.897	14.8478	-0.203216
2019-01-16 04:15:00	1.62667	116.81	1.63833	144.735	1.007	165.077	1.38267	85.1524	26.46	975.748	13.9583	-0.314062
2019-01-16 04:30:00	1.116	136.742	2.14967	145.175	1.63833	161.56	1.63833	137.084	26.46	975.748	14.6767	-0.410128
2019-01-16 04:45:00	0	142.043	1.63833	142.342	1.63833	158.824	0	125.408	26.46	975.451	17.0373	-0.103456
2019-01-16 05:00:00	2.90333	163.197	3.17233	158.17	2.40533	165.566	2.91667	164.735	26.46	975.451	19.09	0.107151
2019-01-16 05:15:00	3.15867	169.67	3.17233	157.706	2.40533	172.406	2.91667	166.836	26.46	975.153	22.1006	0.639208
2019-01-16 05:30:00	4.18	179.809	3.428	157.953	3.428	172.97	3.68367	173.043	26.46	975.451	22.2377	2.50141
2019-01-16 05:45:00	4.946	173.897	4.70633	166.6	4.70633	169.867	4.962	173.336	26.46	975.153	25.8983	4.75527
2019-01-16 06:00:00	4.43533	172.411	4.195	157.101	4.45067	164.496	4.195	171.971	26.46	975.153	28.5332	3.584
2019-01-16 06:15:00	5.20133	144.617	3.93933	149.485	3.68367	162.914	4.70633	147.304	26.46	975.153	28.8764	4.5188
2019-01-16 06:30:00	6.478	147.9	5.98467	144.366	3.93933	164.195	6.24033	153.837	26.46	975.153	28.6046	6.05216
2019-01-16 06:45:00	5.45667	149.664	5.21767	152.263	3.17233	170.919	5.47333	150.348	26.46	975.177	27.5448	7.05346
2019-01-16 07:00:00	6.73333	157.776	4.962	155.269	3.93933	176.124	5.98467	156.628	26.46	975.187	26.2446	6.86133
2019-01-16 07:15:00	5.45667	153.77	3.428	158.103	3.17233	172.215	4.70633	156.946	26.46	975.243	26.3473	5.81199
2019-01-16 07:30:00	5.712	148.051	4.962	154.632	2.91667	164.909	5.21767	156.505	26.46	975.222	25.2521	8.73831
2019-01-16 07:45:00	7.244	152.422	6.496	142.658	4.962	151.687	7.00733	158.063	26.46	975.466	25.3201	13.4418
2019-01-16 08:00:00	7.244	162.515	5.729	151.675	6.496	157.898	6.496	158.191	26.46	975.451	25.4537	14.639
2019-01-16 08:15:00	6.22267	153.743	5.729	146.201	4.70633	170.744	6.24033	160.29	26.46	975.749	24.9743	14.2806
2019-01-16 08:30:00	7.49933	155.302	7.00733	153.792	5.98467	148.827	7.51867	167.709	26.46	975.897	25.3157	15.5036
2019-01-16 08:45:00	6.98867	157.527	7.51867	150.544	7.263	154.474	6.496	163.193	26.46	976.195	24.4228	14.1476
2019-01-16 09:00:00	6.22267	160.41	6.75167	154.842	8.03	149.762	6.75167	173.742	26.46	976.344	24.7612	14.5392
2019-01-16 09:15:00	5.20133	168.293	5.21767	156.156	5.21767	155.742	5.729	163.824	26.46	976.939	25.0342	9.85415
2019-01-16 09:30:00	4.69067	178.214	6.24033	143.369	6.496	166.86	4.70633	173.453	26.46	976.914	23.8691	9.72114
2019-01-16 09:45:00	7.49933	168.686	8.03	146.026	7.263	153.134	8.03	178.107	26.46	976.794	21.7793	10.2532
2019-01-16 10:00:00	5.96733	168.992	6.496	158.195	7.263	159.277	5.98467	172.507	26.46	976.936	22.8376	12.363
2019-01-16 10:15:00	6.478	184.542	4.45067	156.73	4.962	165.331	5.98467	166.087	26.46	977.233	21.7436	11.5575
2019-01-16 10:30:00	5.712	152.296	5.21767	156.34	4.195	174.338	5.98467	166.161	26.46	977.382	21.8803	8.77895
2019-01-16 10:45:00	4.69067	152.296	5.729	157.267	6.24033	148.976	5.21767	177.438	26.46	977.233	21.8803	6.40686
2019-01-16 11:00:00	4.946	152.685	4.962	154.895	5.21767	164.937	4.70633	165.718	26.46	977.382	18.4927	7.75179
2019-01-16 11:15:00	4.946	155.027	7.263	125.46	7.51867	135.747	5.21767	150.073	26.46	977.233	18.2533	7.07193
2019-01-16 11:30:00	6.22267	152.782	5.98467	148.426	6.496	152.416	6.24033	174.211	26.46	977.233	18.5268	7.55226
2019-01-16 11:45:00	4.946	196.103	5.98467	175.981	7.263	197.592	5.98467	189.074	26.46	976.936	19.4838	7.48576
2019-01-16 12:00:00	4.946	161.412	5.47333	144.828	5.21767	153.602	5.21767	179.569	26.46	976.598	18.5256	6.38469
2019-01-16 12:15:00	3.66933	154.457	5.729	131.236	5.21767	160.313	3.93933	164.51	26.46	976.341	18.4885	6.64333
2019-01-16 12:30:00	6.478	147.729	5.47333	139.879	4.45067	171.712	5.47333	155.707	26.46	976.042	15.8551	5.11736
2019-01-16 12:45:00	3.414	139.799	3.428	135.072	3.17233	151.803	3.68367	146.948	26.46	975.745	17.427	4.92892
2019-01-16 13:00:00	4.946	170.345	5.98467	147.466	5.47333	180.836	4.962	171.98	26.46	975.596	17.427	4.94001
2019-01-16 13:15:00	4.43533	137.652	4.45067	145.636	4.45067	157.439	3.93933	140.897	26.46	975.438	17.1536	6.66181
2019-01-16 13:30:00	4.946	163.758	4.195	161.568	4.45067	160.366	4.70633	170.394	26.46	975.725	17.837	7.28254
2019-01-16 13:45:00	2.648	145.972	5.729	128.192	6.24033	127.82	3.17233	161.22	26.46	975.743	16.8119	7.07563
2019-01-16 14:00:00	4.69067	182.349	6.496	190.04	6.496	199.232	4.45067	191.571	26.46	975.447	15.8551	8.75309
2019-01-16 14:15:00	4.946	171.955	5.47333	179.208	5.729	198.207	4.962	169.759	26.46	975.596	14.5566	7.51532
2019-01-16 14:30:00	5.20133	137.457	4.962	138.854	4.45067	150.729	5.21767	145.24	26.46	975.744	14.3858	6.90567
2019-01-16 14:45:00	5.20133	188.497	5.21767	189.503	5.47333	193.816	5.47333	179.421	26.46	975.744	14.625	7.14583
2019-01-16 15:00:00	5.45667	210.235	6.24033	186.161	7.51867	193.108	5.21767	181.714	26.46	975.744	14.42	9.17061
2019-01-16 15:15:00	4.43533	193.206	6.24033	189.43	6.496	191.547	4.962	187.301	26.46	975.744	14.7617	7.28623
2019-01-16 15:30:00	4.946	176.2	4.962	174.45	6.24033	188.253	4.70633	179.811	26.46	975.15	14.83	10.3677
2019-01-16 15:45:00	4.69067	193.376	3.93933	195.237	5.47333	187.521	4.45067	196.353	26.46	975.447	14.83	8.16191
2019-01-16 16:00:00	3.92467	147.07	4.45067	157.494	6.496	169.906	3.68367	165.295	26.46	975.298	15.24	7.80351
2019-01-16 16:15:00	3.66933	189.204	3.93933	166.643	4.195	171.028	3.93933	174.346	26.46	975.15	16.6752	8.03259
2019-01-16 16:30:00	4.946	145.045	4.195	165.96	4.70633	175.81	5.21767	170.247	26.46	974.704	17.2903	11.5205
2019-01-16 16:45:00	5.96733	175.767	4.45067	163.331	6.496	185.137	5.98467	176.401	26.46	974.258	18.1818	11.9861
2019-01-16 17:00:00	5.45667	178.774	4.45067	175.833	5.98467	194.906	5.21767	183.704	26.46	973.947	18.9368	10.4047
2019-01-16 17:15:00	5.96733	176.578	5.21767	155.406	4.195	174.747	5.21767	182.264	26.46	973.664	19.6205	12.9393
2019-01-16 17:30:00	5.96733	158.981	4.962	157.091	5.47333	170.818	5.47333	169.476	26.46	973.367	19.894	16.3866
2019-01-16 17:45:00	6.478	164.939	6.24033	164.564	6.75167	161.643	6.24033	160.081	26.46	973.367	20.5127	18.6516
2019-01-16 18:00:00	8.01	155.103	5.729	168.203	5.98467	166.087	8.03	157.934	26.46	972.772	21.3333	19.4903
2019-01-16 18:15:00	6.73333	170.237	7.263	154.484	7.77433	185.933	6.496	168.333	26.46	973.069	21.5385	20.4547
2019-01-16 18:30:00	8.26533	166.331	8.54133	162.247	8.28567	169.432	8.28567	170.31	26.46	973.069	21.812	20.1443
2019-01-16 18:45:00	5.45667	161.108	5.729	156.193	7.263	156.445	5.98467	174.118	26.46	973.069	22.2906	23.2332
2019-01-16 19:00:00	8.01	158.032	7.77433	153.264	6.75167	162.206	8.03	163.964	26.46	973.072	22.9744	28.6646
2019-01-16 19:15:00	7.244	147.048	7.51867	143.549	8.03	153.687	6.75167	160.302	26.46	973.07	23.0428	25.8602
2019-01-16 19:30:00	8.01	154.055	8.28567	149.36	5.98467	160.402	7.77433	159.987	26.46	972.921	23.6926	26.0634
2019-01-16 19:45:00	9.28667	154.51	7.77433	147.279	7.51867	156.341	9.05267	159.906	26.46	972.507	23.9344	29.8026
2019-01-16 20:00:00	9.03133	151.979	8.54133	141.012	7.263	154.103	9.30833	157.472	26.46	972.506	23.4568	32.3373
2019-01-16 20:15:00	9.03133	152.712	8.54133	146.872	7.00733	166.164	9.564	158.425	26.46	972.502	23.3886	29.762
2019-01-16 20:30:00	8.26533	153.126	7.263	145.821	7.77433	191.529	8.03	158.106	26.46	972.494	22.7044	25.3651
2019-01-16 20:45:00	8.01	170.018	6.496	178.778	5.729	185.253	7.77433	178.563	26.46	973.083	22.0204	28.0476
2019-01-16 21:00:00	6.98867	158.319	7.263	151.942	7.00733	154.023	7.00733	165.887	26.46	972.772	22.3616	28.0365
2019-01-16 21:15:00	6.73333	161.839	5.98467	159.05	5.47333	164.085	7.00733	167.893	26.46	972.921	22.0202	22.945
2019-01-16 21:30:00	5.712	157.459	6.75167	151.692	6.496	169.25	5.47333	170.569	26.46	972.921	22.4976	24.4451
2019-01-16 21:45:00	8.52067	159.127	7.263	149.259	5.98467	155.612	8.54133	163.4	26.46	972.779	23.3877	26.1226
2019-01-16 22:00:00	10.308	181.226	7.00733	155.342	6.496	165.821	10.0753	167.628	26.46	972.959	22.978	31.6648
2019-01-16 22:15:00	8.776	164.551	8.54133	172.041	8.28567	146.9	8.28567	167.383	26.46	972.802	23.7986	33.3608
2019-01-16 22:30:00	9.03133	159.863	6.496	150.361	6.496	149.707	8.797	178.564	26.46	972.937	23.8669	31.1032
2019-01-16 22:45:00	6.73333	164.749	6.75167	159.544	6.24033	159.231	6.75167	178.64	26.46	972.786	23.8673	28.3395
2019-01-16 23:00:00	8.52067	160.036	6.496	145.456	5.47333	152.297	7.77433	170.583	26.46	972.994	24.1408	23.0669
2019-01-16 23:15:00	7.244	159.963	6.496	142.844	6.24033	146.56	7.51867	168.63	26.46	972.819	24.1409	23.4364
2019-01-16 23:30:00	7.49933	157.18	6.75167	142.893	6.496	156.155	7.00733	172	26.46	973.089	24.2777	23.6987
2019-01-16 23:45:00	9.79733	153.176	6.496	138.45	5.729	149.66	9.81967	171.853	26.46	972.79	24.4828	28.7385
2019-01-17	6.73333	150.414	6.75167	145.721	6.75167	168.724	6.75167	162.035	26.46	972.808	24.8583	26.7285
2019-01-17 00:15:00	8.776	155.554	5.47333	154.84	5.98467	150.232	8.28567	156.823	26.46	972.505	25.472	33.5381
2019-01-17 00:30:00	9.03133	154.945	8.28567	143.196	7.77433	149.208	8.797	172.033	26.46	972.475	25.9509	30.9222
2019-01-17 00:45:00	7.75467	155.43	6.496	141.997	5.21767	156.285	7.77433	157.921	26.46	972.476	25.9846	33.0024
2019-01-17 01:00:00	7.244	160.972	6.24033	145.684	4.70633	164.927	6.75167	160.557	26.46	972.178	26.224	25.875
2019-01-17 01:15:00	7.75467	161.086	7.51867	149.313	7.00733	161.428	7.263	171.949	26.46	972.178	26.5988	22.6088
2019-01-17 01:30:00	6.22267	169.214	6.75167	158.124	7.00733	162.525	6.24033	169.483	26.46	972.029	26.8721	21.3599
2019-01-17 01:45:00	5.96733	167.698	5.47333	160.978	5.47333	164.598	6.24033	186.299	26.46	972.029	27.6239	16.1428
2019-01-17 02:00:00	6.478	170.262	6.24033	153.093	6.496	161.718	6.496	178.317	26.46	972.179	27.6923	18.7403
2019-01-17 02:15:00	7.49933	163.036	5.98467	149.261	7.00733	161.254	7.263	166.454	26.46	972.029	28.0342	18.5703
2019-01-17 02:30:00	5.96733	171.751	5.98467	158.708	6.24033	162.353	5.729	188.081	26.46	972.029	28.4445	20.1369
2019-01-17 02:45:00	7.75467	172.361	6.75167	164.493	7.51867	153.882	6.75167	182.223	26.46	971.88	28.718	24.2936
2019-01-17 03:00:00	6.73333	166.332	7.263	151.604	6.496	170.603	7.263	177.633	26.46	971.732	29.265	25.1213
2019-01-17 03:15:00	5.45667	162.792	8.54133	145.965	7.77433	162.524	6.496	177.438	26.46	971.583	29.6752	22.897
2019-01-17 03:30:00	6.73333	175.168	5.47333	152.092	4.70633	168.65	6.24033	181.051	26.46	971.593	30.0855	18.441
2019-01-17 03:45:00	6.98867	175.266	7.263	161.271	6.496	165.257	6.496	189.253	26.46	971.286	30.9744	18.6035
2019-01-17 04:00:00	7.75467	178.293	6.75167	164.688	6.24033	163.305	7.263	186.885	26.46	971.286	31.8633	18.0235
2019-01-17 04:15:00	5.96733	162.084	6.24033	151.653	5.729	162.011	5.98467	171.946	26.46	970.988	30.9744	19.8007
2019-01-17 04:30:00	7.49933	160.327	6.75167	154.143	6.496	158.178	7.77433	161.523	26.46	970.863	31.8633	19.7822
2019-01-17 04:45:00	5.712	158.62	4.70633	162.103	3.93933	180.833	5.729	166.431	26.46	970.988	33.0944	19.2686
2019-01-17 05:00:00	6.73333	163.631	6.24033	143.704	6.496	159.505	6.496	183.77	26.46	970.542	34.1898	24.6114
2019-01-17 05:15:00	6.478	156.759	7.00733	160.22	5.729	174.898	7.263	165.084	26.46	970.839	33.3035	19.4829
2019-01-17 05:30:00	5.45667	152.296	5.729	152.315	5.21767	165.968	5.729	155.811	26.46	971.003	34.2618	18.9213
2019-01-17 05:45:00	6.98867	155.666	7.00733	150.339	5.98467	161.061	6.75167	161.599	26.46	970.707	34.057	22.7455
2019-01-17 06:00:00	5.20133	164.333	5.729	155.003	5.729	161.77	5.21767	168.362	26.46	971.041	34.3307	13.6894
2019-01-17 06:15:00	6.22267	170.071	5.98467	160.593	6.24033	161.526	5.98467	175.735	26.46	971.038	34.6042	16.3017
2019-01-17 06:30:00	6.22267	159.06	5.729	148.313	5.47333	174.807	5.729	163.381	26.46	971.063	35.63	19.712
2019-01-17 06:45:00	6.22267	153.811	5.21767	140.818	5.47333	161.99	6.496	164.187	26.46	971.102	34.9119	20.4325
2019-01-17 07:00:00	5.20133	158.254	6.24033	146.775	4.70633	166.165	5.47333	158.45	26.46	971.045	34.399	20.2071
2019-01-17 07:15:00	4.946	168.46	5.21767	155.882	3.93933	161.282	4.962	170.73	26.46	971.389	35.4932	21.3377
2019-01-17 07:30:00	5.712	168.777	5.729	141.843	5.729	151.784	6.24033	171.292	26.46	971.629	35.6984	18.441
2019-01-17 07:45:00	3.92467	173.416	4.70633	161.204	3.93933	170.584	4.195	172.976	26.46	971.916	35.6984	14.1402
2019-01-17 08:00:00	5.20133	160.824	3.93933	156.838	3.93933	168.123	5.21767	161.263	26.46	972.331	35.284	16.4716
2019-01-17 08:15:00	5.712	147.731	5.729	144.403	5.47333	143.337	5.98467	152.564	26.46	972.475	36.5812	17.3842
2019-01-17 08:30:00	3.92467	149.193	4.70633	143.155	3.93933	148.314	4.45067	165.157	26.46	972.772	36.8883	11.0106
2019-01-17 08:45:00	4.18	164.156	3.93933	154.504	3.428	167.841	4.195	167.28	26.46	973.367	36.6434	10.6375
2019-01-17 09:00:00	4.43533	153.124	4.195	150.403	3.17233	166.352	4.45067	153.685	26.46	973.645	36.8484	12.3075
2019-01-17 09:15:00	4.946	149.317	4.195	140.516	5.21767	155.344	4.962	156.393	26.46	973.814	37.3149	11.0476
2019-01-17 09:30:00	3.15867	151.412	3.93933	140.391	4.195	161.708	2.91667	184.837	26.46	974.556	35.264	9.07824
2019-01-17 09:45:00	4.18	149.477	4.70633	144.164	4.962	173.508	3.93933	163.651	26.46	974.853	34.5787	9.20386
2019-01-17 10:00:00	2.90333	150.68	5.21767	143.679	5.47333	145.899	3.93933	161.826	26.46	974.869	34.091	8.19147
2019-01-17 10:15:00	2.648	143.093	3.93933	146.433	3.93933	158.97	2.91667	157.19	26.46	975.446	33.5782	8.15822
2019-01-17 10:30:00	3.15867	147.068	4.195	143.677	4.70633	156.019	2.91667	157.385	26.46	975.446	33.2024	7.85524
2019-01-17 10:45:00	4.18	150.775	5.729	144.872	5.21767	148.141	4.195	148.532	26.46	975.446	33.9539	7.85894
2019-01-17 11:00:00	3.15867	154.279	3.68367	152.668	4.962	171.009	2.91667	157.791	26.46	975.743	32.9956	4.36731
2019-01-17 11:15:00	1.882	157.627	2.40533	144.699	3.428	143.727	1.894	158.797	26.46	975.743	31.4892	3.2995
2019-01-17 11:30:00	2.13733	152.675	3.68367	142.428	3.68367	176.057	2.14967	162.16	26.46	975.873	29.5034	3.38078
2019-01-17 11:45:00	1.62667	155.503	4.45067	152.399	4.45067	142.044	2.661	160.379	26.46	975.451	28.8885	3.25146
2019-01-17 12:00:00	0.882667	178.421	3.428	146.718	4.195	161.061	0.751333	171.058	26.46	975.296	30.4593	1.83634
2019-01-17 12:15:00	1.116	161.546	4.195	162.709	4.195	170.08	1.894	167.983	26.46	975.296	28.2734	1.33384
2019-01-17 12:30:00	2.78667	190.167	4.195	182.382	4.45067	185.096	2.14967	192.678	26.46	975.148	27.9316	0.783307
2019-01-17 12:45:00	3.66933	172.325	5.21767	182.046	4.962	201.826	3.17233	161.281	26.46	974.999	29.7763	1.58878
2019-01-17 13:00:00	4.43533	180.981	4.962	176.365	5.729	202.29	4.70633	178.323	26.46	974.851	28.547	2.95588
2019-01-17 13:15:00	3.92467	159.452	4.70633	159.762	4.962	168.376	4.195	183.906	26.46	974.61	26.9421	1.68485
2019-01-17 13:30:00	3.15867	147.408	3.93933	143.89	4.195	146.286	3.428	152.479	26.46	975.421	27.2153	1.3597
2019-01-17 13:45:00	4.946	179.591	5.47333	174.902	4.70633	188.466	4.195	177.689	26.46	975.551	25.4738	1.85851
2019-01-17 14:00:00	2.39267	154.235	3.428	149.887	3.68367	155.064	2.661	154.064	26.46	975.192	24.7226	1.33384
2019-01-17 14:15:00	4.18	154.283	3.93933	147.108	4.70633	138.07	3.17233	166.547	26.46	975.467	26.1567	0.761138
2019-01-17 14:30:00	2.13733	135.9	2.661	138.428	2.661	129.171	2.40533	166.425	26.46	975.622	24.5177	-0.269724
2019-01-17 14:45:00	1.37133	181.542	3.428	157.689	3.68367	180.517	2.661	173.618	26.46	976.041	23.1518	-0.195827
2019-01-17 15:00:00	3.414	170.765	3.93933	194.212	3.68367	196.414	3.428	186.32	26.46	976.039	23.425	-0.144099
2019-01-17 15:15:00	2.39267	191.66	3.17233	151.204	2.14967	175.3	3.17233	204.85	26.46	975.742	23.3908	-0.258639
2019-01-17 15:30:00	1.37133	175.762	2.40533	168.855	2.14967	174.64	1.894	199.485	26.46	976.336	21.1028	-0.258639
2019-01-17 15:45:00	1.116	200.06	2.40533	185.619	2.91667	191.576	1.38267	179.264	26.46	976.188	20.6237	-0.240165
2019-01-17 16:00:00	1.882	183.558	2.40533	182.062	2.40533	194.675	2.14967	180.876	26.46	976.039	19.3265	-0.240165
2019-01-17 16:15:00	2.90333	178.346	3.17233	156.81	2.661	187.197	2.661	186.294	26.46	975.742	20.4881	-0.240165
2019-01-17 16:30:00	3.414	162.159	3.93933	146.62	3.68367	154.6	3.428	160.769	26.46	975.742	22.8103	-0.166268
2019-01-17 16:45:00	4.69067	152.284	4.70633	145.645	4.195	154.576	4.70633	157.77	26.46	975.482	22.4005	0.325146
2019-01-17 17:00:00	4.18	154.85	4.45067	149.287	3.93933	156.313	4.195	159.581	26.46	975.148	21.5852	0.835035
2019-01-17 17:15:00	4.18	150.824	4.70633	142.75	3.93933	151.434	4.195	153.8	26.46	974.406	21.0418	1.2932
2019-01-17 17:30:00	4.69067	150.778	4.45067	140.656	3.93933	156.461	4.70633	155.412	26.46	973.96	20.7689	3.82786
2019-01-17 17:45:00	4.946	139.497	3.428	135.062	2.91667	148.524	4.962	148.939	26.46	973.808	21.9361	4.99174
2019-01-17 18:00:00	5.96733	144.043	3.93933	137.755	3.68367	149.118	5.729	151.338	26.46	973.346	22.484	9.68419
2019-01-17 18:15:00	6.98867	148.289	5.729	139.464	4.45067	151.705	7.00733	151.559	26.46	973.366	21.4591	16.0837
2019-01-17 18:30:00	7.49933	153.657	6.496	145.075	5.729	157.463	7.51867	157.463	26.46	973.663	22.0741	21.0015
2019-01-17 18:45:00	7.75467	147.925	6.75167	133.707	5.47333	151.951	8.03	152.927	26.46	973.366	22.8945	23.8428
2019-01-17 19:00:00	8.26533	149.657	7.00733	143.881	6.24033	155.683	8.54133	154.317	26.46	973.961	26.4481	28.3801
2019-01-17 19:15:00	7.49933	150.931	6.496	157.209	6.496	152.688	7.51867	155.982	26.46	973.961	26.7908	34.0997
2019-01-17 19:30:00	8.52067	162.306	8.797	145.966	9.05267	154.01	8.28567	158.207	26.46	973.961	28.432	36.2206
2019-01-17 19:45:00	8.01	149.527	5.98467	151.146	5.729	142.329	7.77433	148.307	26.46	974.258	30.3471	35.7107
2019-01-17 20:00:00	8.01	154.679	4.70633	151.467	4.45067	148.237	8.28567	153.069	26.46	974.258	30.5528	27.0278
2019-01-17 20:15:00	6.73333	140.505	4.962	130.095	4.45067	149.192	6.496	146.728	26.46	973.962	29.7332	23.6987
2019-01-17 20:30:00	6.73333	143.631	5.47333	136.711	4.195	154.026	6.75167	147.877	26.46	973.969	30.2122	25.7715
2019-01-17 20:45:00	7.244	142.141	6.24033	138.417	4.70633	139.921	7.51867	148.608	26.46	974.259	32.1258	30.8335
2019-01-17 21:00:00	8.26533	147.239	7.51867	140.05	6.75167	151.973	8.28567	153.291	26.46	973.961	33.4241	42.7494
2019-01-17 21:15:00	8.52067	136.48	8.03	130.462	7.263	150.194	8.54133	141.97	26.46	973.515	33.1511	45.7697
2019-01-17 21:30:00	8.01	138.106	7.263	139.31	5.98467	131.176	8.28567	147.232	26.46	973.664	33.2856	43.6805
2019-01-17 21:45:00	8.52067	148.882	9.05267	142.106	9.30833	146.759	8.54133	155.006	26.46	973.664	35.949	32.208
2019-01-17 22:00:00	8.776	149.818	7.00733	136.504	5.21767	180.441	8.797	153.429	26.46	973.961	37.3524	39.0139
2019-01-17 22:15:00	8.52067	140.897	5.98467	138.344	4.962	150.487	7.77433	147.729	26.46	973.664	39.2345	44.0389
2019-01-17 22:30:00	7.75467	133.008	5.98467	133.947	4.45067	160.634	7.51867	140.72	26.46	973.514	40.8119	41.5042
2019-01-17 22:45:00	8.776	148.633	7.51867	146.034	7.51867	163.765	9.05267	153.221	26.46	973.325	42.7277	43.2371
2019-01-17 23:00:00	9.03133	139.163	7.263	137.907	7.00733	133.892	8.797	142.068	26.46	972.771	43.0696	45.5945
2019-01-17 23:15:00	9.28667	155.833	8.03	141.91	8.03	160.421	8.797	144.435	26.46	973.367	43.6165	43.6677
2019-01-17 23:30:00	5.96733	144.582	6.496	141.422	8.28567	130.621	5.729	150.244	26.46	973.664	43.4114	37.1833
2019-01-17 23:45:00	8.52067	141.287	8.54133	132.758	7.51867	146.632	9.30833	142.19	26.46	973.664	43.9583	47.2645
2019-01-18	6.98867	163.887	8.03	136.15	10.5867	146.461	7.263	155.76	26.46	973.218	45.1547	60.3073
2019-01-18 00:15:00	11.074	149.316	8.28567	135.955	6.496	163.618	11.098	153.71	26.46	973.069	46.5561	66.4998
2019-01-18 00:30:00	10.0527	142.507	7.77433	124.02	7.51867	166.938	10.0753	150.293	26.46	973.069	47.7867	63.677
2019-01-18 00:45:00	10.8187	143.215	5.729	141.739	8.03	176.261	10.5867	152.318	26.46	972.474	47.9918	65.0346
2019-01-18 01:00:00	10.5633	141.482	8.03	130.854	7.263	150.585	10.0753	147.852	26.46	972.772	47.103	62.1953
2019-01-18 01:15:00	10.0527	151.684	6.496	148.67	6.24033	162.715	9.564	141.653	26.46	972.921	45.9409	67.6232
2019-01-18 01:30:00	10.5633	142.725	9.81967	134.586	9.05267	144.629	10.0753	149.168	26.46	972.772	46.2821	65.0921
2019-01-18 01:45:00	9.28667	143.19	6.75167	127.07	7.263	158.858	9.05267	149.657	26.46	973.069	42.6591	61.7963
2019-01-18 02:00:00	9.542	140.284	9.05267	131.536	5.47333	153.146	9.564	143.311	26.46	973.069	42.5905	60.3553
2019-01-18 02:15:00	10.0527	144.362	8.28567	142.789	6.496	137.162	10.0753	148.438	26.46	973.069	43.6165	65.5835
2019-01-18 02:30:00	10.308	150.463	8.797	136.931	7.77433	156.199	10.0753	152.074	26.46	973.218	44.9838	69.0751
2019-01-18 02:45:00	11.3293	154.417	9.05267	141.178	7.00733	167.426	10.5867	154.979	26.46	972.772	45.3256	58.9106
2019-01-18 03:00:00	10.8187	145.995	10.5867	141.322	9.30833	138.381	10.8423	152.682	26.46	972.772	44.1628	59.9267
2019-01-18 03:15:00	12.0953	149.975	10.5867	139.029	9.30833	156.735	11.6093	154.099	26.46	972.623	43.0009	70.0173
2019-01-18 03:30:00	9.28667	149.828	7.77433	136.028	8.28567	169.768	8.54133	146.265	26.46	972.474	44.8468	61.6744
2019-01-18 03:45:00	9.542	156.442	5.98467	131.463	6.75167	163.763	9.564	151.414	26.46	972.623	45.4961	62.7754
2019-01-18 04:00:00	10.308	156.05	8.797	127.068	5.47333	153.511	10.0753	149.143	26.46	972.474	44.4361	65.0514
2019-01-18 04:15:00	8.52067	160.567	7.77433	161.606	8.797	172.648	5.98467	154.564	26.46	971.88	44.4026	62.986
2019-01-18 04:30:00	9.79733	161.714	6.75167	166.999	6.496	180.019	8.797	148.364	26.46	971.88	43.2745	61.0278
2019-01-18 04:45:00	11.3293	111.023	5.729	128.316	7.00733	152.758	11.865	138.944	26.46	971.582	41.5655	57.1962
2019-01-18 05:00:00	10.8187	143.166	10.331	135.394	10.0753	135.917	10.5867	150.463	26.46	971.285	41.4288	61.146
2019-01-18 05:15:00	7.244	148.047	5.98467	143.057	7.00733	150.122	7.00733	146.266	26.46	971.285	41.4288	62.173
2019-01-18 05:30:00	9.79733	153.392	6.75167	136.638	6.496	139.652	9.564	148.926	26.46	971.582	41.087	57.7098
2019-01-18 05:45:00	8.26533	142.043	6.24033	150.525	6.24033	171.087	8.54133	160.446	26.46	971.731	42.3859	61.3936
2019-01-18 06:00:00	8.52067	141.775	7.77433	142.349	7.263	158.103	8.03	151.611	26.46	971.731	42.9328	61.6817
2019-01-18 06:15:00	10.308	142.971	8.54133	146.645	8.54133	160.031	10.0753	147.73	26.46	971.88	44.5052	60.8282
2019-01-18 06:30:00	8.776	149.658	7.00733	134.099	7.77433	150.439	8.797	150.463	26.46	971.88	45.804	48.3988
2019-01-18 06:45:00	9.03133	147.85	7.51867	145.471	4.962	138.063	8.54133	151.12	26.46	971.88	46.5554	49.8398
2019-01-18 07:00:00	9.28667	132.793	8.28567	123.142	7.77433	156.541	9.30833	136.528	26.46	971.88	45.7357	50.9002
2019-01-18 07:15:00	6.98867	156.004	7.00733	146.059	6.496	175.724	7.77433	137.528	26.46	972.028	45.2572	51.0997
2019-01-18 07:30:00	9.03133	124.786	8.54133	132.072	3.68367	143.188	8.797	145.067	26.46	971.88	45.1197	47.5379
2019-01-18 07:45:00	5.45667	141.189	5.98467	137.37	4.962	171.916	5.98467	142.409	26.46	972.177	42.9328	51.3362
2019-01-18 08:00:00	6.22267	137.26	6.75167	127.95	5.98467	174.821	6.496	147.608	26.46	972.474	43.8899	48.432
2019-01-18 08:15:00	8.52067	132.647	9.30833	142.667	8.28567	140.115	7.77433	151.611	26.46	972.199	43.8899	46.7324
2019-01-18 08:30:00	6.98867	143.545	7.51867	137.477	5.47333	150.157	7.00733	150.694	26.46	972.479	44.6991	46.3334
2019-01-18 08:45:00	10.0527	149.461	8.797	144.929	9.05267	157.707	9.30833	145.581	26.46	972.772	46.1302	49.1488
2019-01-18 09:00:00	9.79733	147.85	9.05267	137.536	5.98467	165.246	9.81967	147.631	26.46	972.772	47.0186	51.0406
2019-01-18 09:15:00	9.28667	144.435	8.28567	137.463	7.51867	171.809	9.05267	147.094	26.46	972.772	47.292	50.9593
2019-01-18 09:30:00	9.79733	145.63	9.30833	144.05	7.77433	150.973	10.5867	145.142	26.46	972.772	47.3603	54.7281
2019-01-18 09:45:00	10.5633	137.433	7.51867	143.587	9.564	150.51	10.331	148.973	26.46	973.367	46.5061	54.2182
2019-01-18 10:00:00	11.5847	143.874	12.1207	135.584	11.098	157.707	11.098	159.586	26.46	973.946	46.7453	51.2143
2019-01-18 10:15:00	9.03133	138.45	5.98467	127.842	6.75167	130.691	8.28567	157.235	26.46	974.258	47.2894	52.7402
2019-01-18 10:30:00	10.8187	146.805	10.8423	133.928	9.05267	133.266	11.098	150.927	26.46	973.946	48.1053	49.5811
2019-01-18 10:45:00	10.308	135.364	9.81967	133.074	8.28567	155.88	10.331	146.073	26.46	974.089	46.2604	42.4944
2019-01-18 11:00:00	11.3293	156.955	10.5867	148.589	10.331	166.882	10.331	156.442	26.46	973.921	45.5021	38.4301
2019-01-18 11:15:00	8.52067	147.678	7.00733	144.19	6.496	159.019	8.03	154.507	26.46	973.815	44.7481	33.7155
2019-01-18 11:30:00	7.244	152.458	7.00733	147.946	5.729	165.75	7.51867	152.995	26.46	973.663	43.6209	30.9037
2019-01-18 11:45:00	5.96733	153.385	6.24033	150.019	6.75167	152.848	5.98467	145.361	26.46	973.366	44.3723	29.0969
2019-01-18 12:00:00	7.49933	153.556	8.03	145.263	7.00733	157.58	8.03	149.629	26.46	973.069	44.7481	28.805
2019-01-18 12:15:00	4.946	142.41	5.98467	136.848	6.24033	148.336	5.21767	148.336	26.46	973.069	44.7481	25.2247
2019-01-18 12:30:00	6.478	133.508	6.496	122.8	7.00733	125.02	5.98467	133.41	26.46	972.474	44.4748	22.461
2019-01-18 12:45:00	3.92467	133.117	6.24033	144.238	6.496	152.263	3.68367	149.385	26.46	972.177	44.8847	21.2749
2019-01-18 13:00:00	8.01	145.239	8.03	134.873	8.03	139.922	7.77433	149.629	26.46	972.177	44.6798	22.9561
2019-01-18 13:15:00	8.01	149.141	9.05267	140.092	9.30833	143.946	8.03	153.995	26.46	971.88	45.5679	22.4277
2019-01-18 13:30:00	8.01	140.044	7.77433	137.263	8.03	147.458	7.77433	145.654	26.46	971.731	45.0897	19.9337
2019-01-18 13:45:00	6.98867	126.191	8.03	137.263	8.03	146.532	7.263	143.117	26.46	971.583	44.1332	15.2708
2019-01-18 14:00:00	7.75467	145.897	7.77433	147.214	7.00733	155.946	7.51867	155.726	26.46	971.731	44.0649	17.1884
2019-01-18 14:15:00	7.75467	133.971	5.729	133.434	6.496	152.727	7.263	140.093	26.46	971.583	43.655	10.8961
2019-01-18 14:30:00	6.73333	133.508	5.729	129.605	6.75167	138.264	6.75167	153.653	26.46	971.583	43.3817	10.9367
2019-01-18 14:45:00	4.69067	136.727	5.729	144.214	6.24033	159.214	4.70633	145.044	26.46	971.583	42.4595	9.6768
2019-01-18 15:00:00	3.92467	127.02	4.45067	138.092	4.70633	139.459	4.195	143.727	26.46	971.583	42.7669	12.5551
2019-01-18 15:15:00	6.73333	141.751	5.98467	136.995	5.729	145.019	6.75167	145.385	26.46	971.286	42.6986	13.9887
2019-01-18 15:30:00	4.18	83.4118	3.17233	121.824	2.91667	130.971	4.195	83.6313	26.46	971.286	42.2203	13.4714
2019-01-18 15:45:00	4.69067	94.0944	3.17233	91.7523	2.14967	97.6552	4.195	112.777	26.46	971.286	43.2451	12.8913
2019-01-18 16:00:00	5.712	139.581	4.45067	139.019	3.68367	147.897	4.962	154.458	26.46	971.286	42.5619	14.9013
2019-01-18 16:15:00	6.98867	117.801	5.21767	111.581	4.962	118.313	7.00733	120.874	26.46	970.989	43.1085	16.5492
2019-01-18 16:30:00	6.22267	123.167	4.70633	102.045	4.70633	135.215	7.263	120.508	26.46	971.731	42.6986	17.5949
2019-01-18 16:45:00	6.22267	111.118	4.45067	109.386	4.45067	106.801	6.75167	117.459	26.46	971.434	42.6986	20.1037
2019-01-18 17:00:00	5.45667	107.07	5.47333	115.166	5.47333	126.776	5.98467	107.338	26.46	970.84	42.8352	16.915
2019-01-18 17:15:00	4.946	99.9478	4.962	99.9715	2.661	108.728	5.21767	120.362	26.46	970.691	43.3817	18.3745
2019-01-18 17:30:00	6.73333	96.6796	5.98467	91.923	5.729	96.2894	6.496	105.143	26.46	970.109	43.3134	23.5472
2019-01-18 17:45:00	1.882	74.3021	3.68367	93.6485	3.17233	99.1345	1.894	96.1829	26.46	970.174	43.9353	31.0034
2019-01-18 18:00:00	6.22267	103.217	4.195	94.4628	2.14967	102.851	4.962	105.095	26.46	970.095	43.9389	31.4949
2019-01-18 18:15:00	5.20133	104.003	5.47333	81.734	3.68367	123.593	5.729	111.81	26.46	970.245	43.6679	33.1132
2019-01-18 18:30:00	8.26533	114.538	7.00733	121.373	6.496	103.535	8.28567	118.636	26.46	970.096	42.2996	44.7483
2019-01-18 18:45:00	8.52067	106.753	7.263	115.221	6.75167	139.515	8.797	124.78	26.46	970.094	42.5033	47.8704
2019-01-18 19:00:00	8.26533	110.658	8.03	111.297	6.24033	110.585	8.28567	118.855	26.46	970.245	42.3677	46.3923
2019-01-18 19:15:00	7.49933	115.828	7.263	83.6794	5.47333	98.9955	7.00733	118.975	26.46	970.393	41.6494	43.7765
2019-01-18 19:30:00	8.26533	111.439	7.77433	105.296	8.28567	130.322	8.797	102.193	26.46	970.393	41.3428	38.2343
2019-01-18 19:45:00	8.52067	101.83	8.54133	88.3685	7.00733	103.904	8.54133	106.222	26.46	970.393	41.2756	38.7626
2019-01-18 20:00:00	5.96733	96.5382	6.24033	93.25	5.98467	98.9047	5.729	93.0983	26.46	970.69	41.2081	35.3375
2019-01-18 20:15:00	5.712	114.518	5.98467	108.034	6.496	116.079	6.24033	115.323	26.46	970.691	41.4128	32.7622
2019-01-18 20:30:00	5.45667	113.977	4.70633	111.102	4.45067	129.395	5.98467	128.175	26.46	970.988	41.172	25.9748
2019-01-18 20:45:00	4.43533	101.897	3.428	101.071	3.68367	105.434	4.195	93.2126	26.46	971.101	40.863	21.6112
2019-01-18 21:00:00	4.43533	135.46	3.17233	82.9425	1.63833	113.042	3.428	105.601	26.46	971.213	40.5199	15.6107
2019-01-18 21:15:00	4.69067	103.452	2.91667	117.871	3.17233	110.16	3.93933	115.429	26.46	971.193	40.2456	15.6514
2019-01-18 21:30:00	5.96733	106.989	3.17233	107.747	2.661	105.793	4.70633	111.282	26.46	971.344	40.8262	17.6983
2019-01-18 21:45:00	3.15867	105.581	4.45067	134.932	2.661	118.559	3.68367	115.754	26.46	971.403	40.9998	14.5281
2019-01-18 22:00:00	5.96733	103.07	4.70633	82.4599	3.68367	97.6296	5.729	101.24	26.46	971.555	40.0437	10.6522
2019-01-18 22:15:00	0	320.551	0	14.5355	0.375667	90.3105	0	309.281	26.46	971.816	40.6584	5.73071
2019-01-18 22:30:00	0	37.7139	1.127	86.1648	0	106.262	0	62.5231	26.46	971.866	40.7258	2.61595
2019-01-18 22:45:00	0.744	113.125	0	105.591	0.751333	107.294	1.894	116.247	26.46	972.173	40.9334	1.08628
2019-01-18 23:00:00	2.90333	134.277	2.14967	122.206	2.91667	111.93	2.661	123.664	26.46	972.171	40.7287	0.591175
2019-01-18 23:15:00	3.414	123.3	2.91667	127.551	2.661	120.031	3.93933	130.034	26.46	972.177	40.1826	0.783307
2019-01-18 23:30:00	1.37133	133.837	2.40533	128.938	2.91667	120.077	0.751333	131.983	26.46	972.177	40.1817	0.22908
2019-01-18 23:45:00	1.882	113.881	1.38267	120.473	0	119.687	0.751333	122.81	26.46	972.326	40.3186	0.0184742
2019-01-19	2.39267	130.763	3.17233	114.812	2.14967	119.199	2.91667	133.544	26.46	972.177	40.5233	-0.0628124
2019-01-19 00:15:00	2.39267	136.008	2.40533	132.28	1.894	119.687	2.40533	132.934	26.46	972.177	41.856	-0.11454
2019-01-19 00:30:00	2.13733	138.844	1.894	130.774	0.751333	119.741	2.661	140.161	26.46	972.177	43.2245	-0.0923711
2019-01-19 00:45:00	3.92467	155.743	3.17233	140.183	2.91667	120.662	4.195	165.697	26.46	971.88	44.1448	-0.0295588
2019-01-19 01:00:00	2.90333	157.767	3.17233	137.084	1.894	120.905	3.428	168.842	26.46	971.88	45.6479	-0.221691
2019-01-19 01:15:00	2.39267	155.45	2.14967	143.403	1.38267	120.857	2.661	171.112	26.46	971.581	46.6732	-0.251249
2019-01-19 01:30:00	1.37133	170.72	2.14967	147.305	1.127	120.88	1.63833	182.211	26.46	971.707	47.9028	-0.240165
2019-01-19 01:45:00	0	205.751	0.751333	147.377	0	120.855	1.127	220.584	26.46	971.568	51.046	-0.251249
2019-01-19 02:00:00	0.744	240.206	1.38267	147.407	0	120.859	1.63833	248.232	26.46	971.583	53.6445	-0.240165
2019-01-19 02:15:00	1.37133	252.629	1.38267	228.262	0.375667	120.886	1.63833	266.657	26.46	971.691	55.0808	-0.240165
2019-01-19 02:30:00	1.116	282.374	1.38267	265.327	0	120.815	1.63833	268.322	26.46	971.577	56.9271	-0.240165
2019-01-19 02:45:00	0	282.377	1.38267	265.329	0	120.865	1.127	268.446	26.46	971.58	57.5427	-0.251249
2019-01-19 03:00:00	1.62667	282.379	1.38267	280.092	0	120.818	1.63833	283.77	26.46	971.583	56.7914	-0.240165
2019-01-19 03:15:00	1.62667	291.163	1.63833	281.898	0	120.818	1.63833	289.577	26.46	971.583	57.2014	-0.269724
2019-01-19 03:30:00	2.39267	304.777	2.14967	296.731	1.63833	120.403	2.661	305.118	26.46	971.284	56.5864	-0.240165
2019-01-19 03:45:00	2.39267	321.953	2.14967	305.271	1.63833	118.622	2.14967	319.488	26.46	970.988	56.0396	-0.262334
2019-01-19 04:00:00	1.882	329.979	2.14967	333.377	1.894	117.06	1.894	320.757	26.46	970.988	53.9894	-0.280808
2019-01-19 04:15:00	2.648	348.936	2.40533	13.559	2.91667	89.7349	2.40533	326.979	26.46	970.691	51.6658	-0.306672
2019-01-19 04:30:00	3.15867	353.182	3.93933	10.5337	2.91667	88.9054	3.17233	352.645	26.46	970.393	51.1532	-0.302977
2019-01-19 04:45:00	3.92467	352.401	3.68367	13.071	2.91667	88.7834	3.428	351.279	26.46	970.245	52.9643	0.399043
2019-01-19 05:00:00	4.43533	347.107	3.17233	11.6072	2.40533	88.6614	4.195	341.666	26.46	970.096	56.6547	0.465551
2019-01-19 05:15:00	1.62667	329.37	3.428	324.057	2.40533	88.8078	1.63833	317.927	26.46	970.245	62.9762	0.465551
2019-01-19 05:30:00	1.882	337.665	3.93933	328.839	2.661	88.4174	1.63833	328.516	26.46	970.245	62.3954	1.27842
2019-01-19 05:45:00	5.96733	344.496	2.91667	22.6961	2.661	85.6361	5.729	342.691	26.46	970.096	61.4728	3.32906
2019-01-19 06:00:00	4.69067	346.277	3.17233	13.1321	2.14967	61.3359	4.70633	340.153	26.46	969.948	63.0788	5.3021
2019-01-19 06:15:00	5.45667	350.92	4.962	14.1444	4.45067	51.0899	4.70633	354.531	26.46	970.096	63.6268	6.04846
2019-01-19 06:30:00	3.92467	0.0975987	3.428	5.2626	4.962	43.4558	4.962	353.014	26.46	970.245	65.1341	7.56704
2019-01-19 06:45:00	5.45667	349.861	4.962	17.3159	3.93933	43.3849	5.47333	346.128	26.46	970.393	64.5566	6.82438
2019-01-19 07:00:00	4.18	356.945	4.195	0.332409	4.45067	42.483	4.195	355.603	26.46	970.691	64.6605	6.00412
2019-01-19 07:15:00	4.69067	0.146407	4.195	2.88837	3.93933	41.4577	5.21767	356.551	26.46	970.691	64.5574	5.76396
2019-01-19 07:30:00	4.18	5.83202	2.661	0.478603	3.17233	40.9949	3.428	0.439231	26.46	970.988	64.2853	5.53118
2019-01-19 07:45:00	3.66933	12.7867	3.68367	3.91413	3.428	40.9468	3.17233	12.3963	26.46	971.007	63.7737	6.27754
2019-01-19 08:00:00	3.414	21.1809	4.195	14.2603	4.70633	38.8723	3.17233	5.88087	26.46	970.989	62.7478	9.15952
2019-01-19 08:15:00	6.478	15.6661	6.24033	5.67087	5.729	21.4005	5.21767	8.73591	26.46	970.989	60.629	10.2901
2019-01-19 08:30:00	8.776	15.4708	7.263	8.23304	4.962	21.7665	8.28567	13.5431	26.46	970.989	54.8873	11.8087
2019-01-19 08:45:00	9.28667	11.7608	8.28567	14.5259	5.98467	0.0975996	9.30833	15.7379	26.46	971.286	47.7062	14.5281
2019-01-19 09:00:00	10.0527	13.492	8.54133	12.0344	7.263	17.0053	9.564	18.2252	26.46	971.583	48.6591	18.1528
2019-01-19 09:15:00	9.28667	9.51512	8.28567	5.25167	6.496	13.6139	9.564	11.8573	26.46	971.732	50.0256	20.4029
2019-01-19 09:30:00	8.01	14.4435	6.75167	4.78811	3.17233	15.3706	7.51867	21.5676	26.46	971.88	49.2739	16.4495
2019-01-19 09:45:00	8.776	11.0278	7.51867	3.27545	6.496	10.2715	8.28567	15.517	26.46	972.178	49.0689	14.2436
2019-01-19 10:00:00	7.49933	11.2474	6.75167	5.44685	4.962	7.5389	6.496	16.5905	26.46	972.178	48.7272	11.7644
2019-01-19 10:15:00	6.98867	5.12353	6.24033	6.59355	4.70633	22.7631	6.75167	19.7866	26.46	972.326	47.8387	7.56335
2019-01-19 10:30:00	5.96733	9.56392	5.21767	1.714	4.195	17.6396	4.45067	17.5908	26.46	972.475	47.5654	4.54466
2019-01-19 10:45:00	4.69067	2.04941	4.70633	7.89872	3.93933	356.915	4.70633	1.73224	26.46	972.475	47.4287	4.41903
2019-01-19 11:00:00	4.69067	356.957	4.195	2.58031	4.195	11.418	3.93933	16.0046	26.46	972.471	47.8379	4.13084
2019-01-19 11:15:00	2.13733	329.982	2.14967	12.608	2.14967	35.9111	0.375667	336.325	26.46	972.771	48.2455	4.66659
2019-01-19 11:30:00	3.15867	2.24444	2.91667	17.7163	3.93933	39.2777	2.91667	345.131	26.46	972.599	47.4937	4.06802
2019-01-19 11:45:00	4.946	332.175	1.63833	21.8635	3.17233	345.569	4.195	0.634295	26.46	972.474	46.3318	4.8772
2019-01-19 12:00:00	2.648	11.7101	5.98467	12.9101	3.68367	50.8656	2.40533	4.17171	26.46	972.326	45.6485	4.3008
2019-01-19 12:15:00	4.18	28.2467	3.68367	10.6372	3.68367	14.5868	4.195	356.743	26.46	972.323	41.0644	4.96587
2019-01-19 12:30:00	2.648	5.95103	2.14967	331.672	2.661	327.307	2.91667	0.195116	26.46	972.181	38.1214	5.05824
2019-01-19 12:45:00	3.15867	353.427	1.38267	10.6832	1.63833	8.85336	2.14967	6.14613	26.46	972.177	36.2767	7.20495
2019-01-19 13:00:00	4.43533	333.818	5.21767	7.60882	2.661	15.5848	4.195	328.282	26.46	972.029	36.0034	11.5021
2019-01-19 13:15:00	5.20133	35.4378	4.962	29.7544	1.894	101.509	4.962	38.6328	26.46	972.177	34.7737	14.6057
2019-01-19 13:30:00	2.90333	2.02432	4.70633	40.0711	3.428	22.1456	2.661	336.086	26.46	971.88	34.9103	21.4818
2019-01-19 13:45:00	5.712	21.0237	4.195	4.75526	5.21767	327.55	4.45067	7.90217	26.46	971.88	36.4817	24.4414
2019-01-19 14:00:00	6.73333	14.2678	3.428	19.8279	3.428	333.745	3.68367	355.061	26.46	971.88	37.6431	26.0597
2019-01-19 14:15:00	3.92467	80.2412	4.195	15.4636	5.98467	281.649	3.93933	311.185	26.46	971.583	40.2391	28.3727
2019-01-19 14:30:00	4.43533	31.3648	5.21767	32.8519	4.45067	285.259	4.70633	5.48762	26.46	971.88	38.5312	26.6124
2019-01-19 14:45:00	7.244	5.56079	4.962	3.24447	4.45067	290.137	7.00733	2.21944	26.46	972.177	39.6926	33.4811
2019-01-19 15:00:00	5.45667	22.7309	5.47333	29.2666	4.195	292.405	4.45067	331.135	26.46	971.88	40.2391	36.9817
2019-01-19 15:15:00	6.22267	351.134	7.263	6.2674	6.496	294.551	5.47333	350.598	26.46	972.177	40.5807	40.0025
2019-01-19 15:30:00	5.20133	21.3651	6.75167	16.828	5.98467	300.843	4.962	10.0484	26.46	971.88	40.7174	41.2506
2019-01-19 15:45:00	6.73333	320.526	5.21767	10.0478	5.729	306.038	5.98467	344.94	26.46	971.88	42.1179	33.5603
2019-01-19 16:00:00	4.43533	72.8268	3.17233	16.9744	2.14967	306.965	3.68367	346.5	26.46	971.88	44.7481	25.7087
2019-01-19 16:15:00	3.15867	37.566	3.68367	331.023	2.91667	306.968	3.428	308.334	26.46	971.997	45.0289	22.472
2019-01-19 16:30:00	5.45667	10.295	3.17233	2.83447	3.68367	310.217	4.70633	349.397	26.46	972.152	48.7574	17.1884
2019-01-19 16:45:00	3.92467	22.7374	4.45067	9.08049	2.91667	310.517	4.45067	29.3489	26.46	972.177	50.467	17.085
2019-01-19 17:00:00	2.39267	23.1034	3.17233	6.0798	1.894	311.25	2.91667	330.328	26.46	972.177	52.0047	17.5764
2019-01-19 17:15:00	3.92467	340.348	4.962	17.8286	3.17233	312.291	4.70633	337.518	26.46	972.326	59.6617	18.6072
2019-01-19 17:30:00	4.18	323.441	6.75167	334.475	3.93933	312.511	4.195	332.102	26.46	972.177	66.0174	17.218
2019-01-19 17:45:00	5.96733	349.083	2.661	16.072	3.93933	313.584	5.729	332.395	26.46	972.474	70.4596	16.346
2019-01-19 18:00:00	5.712	27.9842	4.45067	9.1553	2.14967	314.365	4.45067	1.73224	26.46	972.326	72.6465	20.1591
2019-01-19 18:15:00	5.45667	340.783	5.729	0.944271	4.70633	317.774	5.729	356.642	26.46	972.474	74.8377	22.9709
2019-01-19 18:30:00	7.49933	351.046	5.729	1.13864	7.51867	321.131	7.263	4.00163	26.46	972.49	75.832	27.1091
2019-01-19 18:45:00	6.22267	356.95	6.24033	10.8005	5.98467	322.08	8.03	0.195215	26.46	972.475	77.0332	26.5807
2019-01-19 19:00:00	9.542	331.8	5.21767	5.67576	7.00733	322.625	8.797	330.848	26.46	972.636	77.5137	29.9467
2019-01-19 19:15:00	8.776	342.018	7.00733	6.57797	3.428	324.276	8.797	354.049	26.46	972.861	76.2188	34.266
2019-01-19 19:30:00	8.52067	340.605	7.263	5.0646	7.00733	329.403	8.28567	351.295	26.46	972.995	75.5755	35.3069
2019-01-19 19:45:00	7.244	348.031	7.51867	18.4136	7.00733	332.216	9.30833	356.817	26.46	973.218	74.2437	36.6381
2019-01-19 20:00:00	5.96733	352.204	8.28567	4.52654	5.47333	332.899	9.30833	23.0882	26.46	973.218	70.4837	35.8622
2019-01-19 20:15:00	7.49933	352.666	5.98467	14.0938	7.00733	336.827	8.28567	354.985	26.46	973.069	67.7487	31.4727
2019-01-19 20:30:00	6.98867	0.097624	6.24033	2.9158	7.00733	340.512	6.496	6.36996	26.46	973.367	66.9969	26.1595
2019-01-19 20:45:00	4.69067	6.49202	6.75167	0.623138	6.24033	344.858	4.962	5.83305	26.46	973.515	66.3818	22.1395
2019-01-19 21:00:00	6.73333	10.5434	5.98467	7.77412	2.91667	355.743	6.24033	16.2056	26.46	973.664	66.9287	15.7179
2019-01-19 21:15:00	6.478	14.9853	5.98467	0.279886	4.962	7.37064	5.98467	17.9385	26.46	973.664	66.0742	12.7066
2019-01-19 21:30:00	7.244	12.5691	6.24033	0.110611	3.93933	19.2808	6.75167	18.2557	26.46	973.664	65.9033	10.9404
2019-01-19 21:45:00	6.478	9.6404	4.962	2.08594	2.14967	0.829807	5.729	16.5961	26.46	974.11	65.7665	10.6375
2019-01-19 22:00:00	6.22267	7.63956	5.729	9.28905	3.428	0.0488151	6.24033	17.8175	26.46	974.259	65.7705	10.9367
2019-01-19 22:15:00	5.45667	8.73854	4.70633	1.9928	3.68367	354.326	4.962	14.6456	26.46	974.407	66.1171	8.97847
2019-01-19 22:30:00	5.712	2.78277	4.195	12.7746	4.962	355.072	5.47333	7.20102	26.46	974.705	66.8034	10.5931
2019-01-19 22:45:00	6.22267	7.90892	4.70633	12.8722	3.68367	171.482	5.98467	14.2068	26.46	974.854	67.1111	10.6818
2019-01-19 23:00:00	5.712	8.88533	3.17233	9.38995	1.894	20.5778	5.21767	20.2849	26.46	974.854	66.8718	8.79004
2019-01-19 23:15:00	5.96733	20.7731	5.21767	7.04656	2.91667	14.4509	5.729	27.9741	26.46	974.854	67.1453	8.48337
2019-01-19 23:30:00	6.73333	22.8724	5.729	10.2687	4.195	10.472	6.496	30.586	26.46	974.854	65.3333	8.96369
2019-01-19 23:45:00	6.478	25.8749	5.47333	15.1019	3.428	19.9676	6.496	28.7065	26.46	975.151	63.1111	6.24059
2019-01-20	6.73333	23.7268	5.21767	10.8546	3.17233	20.4558	5.98467	27.1442	26.46	975.151	61.9487	5.07302
2019-01-20 00:15:00	6.22267	23.3606	5.21767	4.80082	4.45067	19.3817	5.98467	28.3403	26.46	975.448	60.8547	4.85503
2019-01-20 00:30:00	6.98867	29.6097	5.98467	19.8864	3.428	22.4086	6.24033	32.4413	26.46	975.448	55.5898	7.3823
2019-01-20 00:45:00	6.478	31.953	5.47333	25.0125	3.428	23.3362	5.98467	30.7569	26.46	975.746	50.3932	6.69506
2019-01-20 01:00:00	6.98867	30.464	5.98467	25.4031	4.45067	33.5885	6.24033	29.927	26.46	975.448	46.1539	10.6781
2019-01-20 01:15:00	6.22267	26.9977	5.47333	17.4453	4.962	31.6357	5.47333	34.5649	26.46	975.448	38.6325	9.58073
2019-01-20 01:30:00	6.98867	21.0172	5.98467	13.2224	2.40533	22.7992	6.24033	18.9424	26.46	975.746	36.8547	7.54487
2019-01-20 01:45:00	7.49933	9.22698	4.962	7.82739	3.68367	15.9641	7.00733	9.2758	26.46	976.043	35.5552	4.57052
2019-01-20 02:00:00	7.244	7.88451	5.21767	0.764721	4.195	19.04	7.00733	13.4989	26.46	976.34	34.5299	4.88828
2019-01-20 02:15:00	7.49933	9.56851	4.962	3.69449	3.428	20.211	7.00733	15.622	26.46	976.192	38.2893	6.78374
2019-01-20 02:30:00	6.73333	11.9609	5.729	2.3595	4.195	12.3026	6.24033	11.4727	26.46	976.043	45.2644	8.66072
2019-01-20 02:45:00	6.98867	11.1311	5.98467	4.97169	3.93933	14.5973	6.496	12.4492	26.46	976.043	46.6325	10.5008
2019-01-20 03:00:00	6.98867	3.27097	5.729	1.31015	4.45067	15.4273	6.75167	8.69005	26.46	975.894	49.7778	11.4208
2019-01-20 03:15:00	5.96733	4.58913	5.21767	3.87323	4.45067	8.86092	5.21767	5.44349	26.46	976.043	45.8803	10.2015
2019-01-20 03:30:00	5.96733	7.3719	4.962	2.71754	4.45067	21.1149	5.98467	13.0839	26.46	976.043	54.1538	11.4503
2019-01-20 03:45:00	5.45667	354.682	5.21767	4.82529	3.93933	3.0757	7.263	356.732	26.46	976.192	48.889	14.0219
2019-01-20 04:00:00	4.69067	349.799	4.70633	14.9227	3.68367	0.537026	5.47333	355.12	26.46	976.192	50.7351	10.8518
2019-01-20 04:15:00	4.946	350.19	4.962	15.5573	3.93933	4.97969	7.00733	356.78	26.46	976.34	55.5556	12.4036
2019-01-20 04:30:00	6.73333	286.088	6.24033	9.16184	5.729	7.44513	8.03	71.6197	26.46	976.34	55.5214	14.3508
2019-01-20 04:45:00	5.96733	8.69005	5.47333	12.5061	4.45067	0.92759	5.47333	3.05128	26.46	976.043	54.6667	13.6931
2019-01-20 05:00:00	4.946	5.51674	6.24033	3.23867	3.68367	11.1799	4.70633	4.51592	26.46	976.192	63.1798	12.5477
2019-01-20 05:15:00	5.96733	61.6359	3.93933	0.0812263	3.68367	7.32308	4.70633	1.83077	26.46	976.638	58.6667	9.83198
2019-01-20 05:30:00	4.43533	3.61272	3.93933	1.35056	3.68367	7.17662	4.70633	10.1547	26.46	976.638	60.4103	9.15952
2019-01-20 05:45:00	5.96733	2.51426	3.93933	4.57271	3.428	24.8496	4.962	353.143	26.46	976.638	55.1111	5.84894
2019-01-20 06:00:00	4.69067	0.097641	3.17233	12.4572	2.40533	4.0521	5.21767	12.791	26.46	977.233	55.1111	4.17518
2019-01-20 06:15:00	3.92467	354.73	4.962	15.4597	4.45067	7.51836	4.962	353.729	26.46	977.53	58.3932	4.62225
2019-01-20 06:30:00	5.20133	355.12	4.195	14.2392	3.93933	0.0488205	4.962	355.902	26.46	977.53	62.6325	6.63225
2019-01-20 06:45:00	6.478	345.356	5.47333	17.5918	3.17233	14.1335	5.98467	343.159	26.46	977.53	67.8291	8.22842
2019-01-20 07:00:00	7.244	337.545	4.45067	5.32943	4.962	12.4492	6.75167	341.06	26.46	977.53	69.7094	9.13735
2019-01-20 07:15:00	6.478	338.769	3.17233	4.37728	3.428	23.1412	5.98467	340.234	26.46	977.847	70.9067	8.59791
2019-01-20 07:30:00	6.478	340.509	4.70633	334.595	2.40533	0.927684	5.98467	342.486	26.46	978.008	66.5366	8.27276
2019-01-20 07:45:00	6.73333	348.205	4.45067	14.1897	3.17233	10.4488	6.75167	347.301	26.46	977.829	71.9401	13.2128
2019-01-20 08:00:00	7.244	346.528	4.70633	9.84533	3.428	6.15139	7.00733	349.189	26.46	977.98	66.5983	13.1426
2019-01-20 08:15:00	5.96733	347.675	4.195	1.82277	3.93933	12.9863	6.24033	346.504	26.46	978.422	63.7265	13.9591
2019-01-20 08:30:00	4.18	13.9137	5.21767	26.8671	4.70633	29.3896	4.962	0.195279	26.46	978.422	62.6316	14.1291
2019-01-20 08:45:00	5.45667	10.0065	4.45067	0.501207	4.45067	23.2591	5.47333	10.275	26.46	978.571	57.7682	12.4553
2019-01-20 09:00:00	9.28667	1.24471	5.47333	0.427896	4.962	20.0618	7.263	21.4041	26.46	979.017	47.7184	15.8176
2019-01-20 09:15:00	8.01	8.17602	7.51867	7.01747	8.54133	58.2572	7.51867	21.3553	26.46	979.315	43.9582	13.1241
2019-01-20 09:30:00	7.49933	19.5248	7.51867	4.57688	3.93933	70.8019	7.00733	24.6989	26.46	979.597	39.788	10.667
2019-01-20 09:45:00	8.01	14.0805	7.00733	6.08681	4.962	22.524	7.77433	20.7182	26.46	979.984	41.7654	10.1719
2019-01-20 10:00:00	6.98867	11.882	6.496	7.20416	7.263	13.9559	6.75167	19.4943	26.46	980.501	41.6207	7.12366
2019-01-20 10:15:00	6.73333	23.1291	5.729	7.22789	3.428	9.00277	6.496	25.5932	26.46	980.501	38.7494	4.8033
2019-01-20 10:30:00	6.73333	13.3212	5.729	18.0117	5.21767	8.51481	5.98467	30.2532	26.46	981.096	37.1775	4.45229
2019-01-20 10:45:00	6.22267	34.4959	5.729	24.0591	4.962	32.1295	5.21767	29.1288	26.46	980.943	36.4231	5.64572
2019-01-20 11:00:00	7.244	356.918	4.962	5.71368	5.98467	24.2499	6.24033	343.402	26.46	981.392	36.7653	14.7942
2019-01-20 11:15:00	3.66933	16.1462	4.962	23.3654	3.68367	33.4874	3.428	9.90233	26.46	981.446	38.6687	12.1228
2019-01-20 11:30:00	4.18	43.1205	2.91667	19.706	2.14967	35.1208	3.428	0.195115	26.46	981.39	38.5995	12.9283
2019-01-20 11:45:00	2.648	327.33	1.894	323.915	1.38267	37.9743	2.40533	331.208	26.46	981.39	33.6806	13.9074
2019-01-20 12:00:00	4.18	351.549	3.68367	3.85285	3.93933	59.0224	4.195	350.647	26.46	981.39	28.8301	13.8557
2019-01-20 12:15:00	4.69067	20.7066	7.00733	25.7058	4.70633	25.5113	4.195	341.549	26.46	981.39	28.0103	12.1745
2019-01-20 12:30:00	6.73333	11.8532	4.70633	13.8037	1.63833	43.9985	6.24033	16.5848	26.46	981.39	24.7993	10.5118
2019-01-20 12:45:00	6.478	2.75579	6.75167	13.0695	4.70633	31.0697	5.98467	26.7531	26.46	981.092	23.9094	11.975
2019-01-20 13:00:00	3.15867	14.5832	3.68367	29.3585	3.17233	40.3842	2.40533	21.2651	26.46	981.39	23.157	8.48706
2019-01-20 13:15:00	4.18	9.24065	4.962	23.7407	2.40533	44.0821	3.68367	7.3145	26.46	981.39	21.3083	11.4208
2019-01-20 13:30:00	3.92467	6.07089	4.45067	1.28469	2.661	67.5112	3.17233	352.794	26.46	981.39	22.264	8.35035
2019-01-20 13:45:00	4.946	28.916	5.21767	18.449	3.17233	35.889	4.70633	7.0949	26.46	981.092	23.8347	6.60638
2019-01-20 14:00:00	5.45667	337.581	5.729	336.183	4.962	25.7464	4.962	346.406	26.46	981.374	23.3567	3.64312
2019-01-20 14:15:00	4.946	24.2348	3.68367	328.235	1.127	39.985	4.195	24.1373	26.46	981.351	22.8786	4.67028
2019-01-20 14:30:00	3.15867	2.46249	4.45067	6.08776	2.40533	32.5244	3.68367	351.746	26.46	981.287	22.1957	5.46837
2019-01-20 14:45:00	2.648	346.797	2.91667	314.947	4.70633	22.9914	3.428	3.4865	26.46	981.058	22.742	6.27015
2019-01-20 15:00:00	3.15867	19.578	2.91667	13.3533	2.40533	44.2517	2.91667	16.823	26.46	980.795	22.4006	4.96218
2019-01-20 15:15:00	2.90333	4.04726	2.661	5.81021	3.93933	32.7194	2.40533	3.51088	26.46	981.092	22.1615	5.91545
2019-01-20 15:30:00	3.414	329.317	2.661	19.6587	2.661	23.2109	2.91667	318.858	26.46	980.795	22.1275	3.76505
2019-01-20 15:45:00	2.39267	330.039	1.63833	321.84	2.40533	19.8472	1.894	325.456	26.46	981.092	21.8553	3.39187
2019-01-20 16:00:00	4.18	327.705	4.962	313.753	3.428	10.73	5.21767	329.583	26.46	980.498	21.5175	3.38817
2019-01-20 16:15:00	1.62667	312.474	2.40533	300.523	1.894	11.1215	2.14967	303.987	26.46	980.201	21.7248	1.96935
2019-01-20 16:30:00	2.13733	310.038	1.007	299.062	0.751333	10.7801	2.40533	309.355	26.46	980.201	21.725	1.66638
2019-01-20 16:45:00	2.90333	312.526	2.91667	308.525	2.91667	10.6338	3.17233	322.135	26.46	979.606	22.1691	0.761138
2019-01-20 17:00:00	2.90333	337.596	3.428	330.938	2.40533	10.6345	2.91667	324.547	26.46	979.042	22.6829	0.727885
2019-01-20 17:15:00	2.39267	341.292	3.68367	336.856	3.428	10.6852	2.14967	317.482	26.46	979.31	22.9604	1.18974
2019-01-20 17:30:00	2.13733	339.909	3.93933	333.767	3.68367	10.5886	2.91667	0.195182	26.46	979.014	22.4842	0.661377
2019-01-20 17:45:00	1.62667	346.373	3.17233	333.497	2.14967	10.6869	1.894	327.732	26.46	978.717	22.759	0.646598
2019-01-20 18:00:00	3.414	347.028	3.428	336.887	2.91667	10.7378	3.17233	343.758	26.46	978.813	22.6952	-0.0738969
2019-01-20 18:15:00	2.13733	348.86	2.661	336.914	2.14967	10.8363	2.14967	348.055	26.46	979.289	22.6286	-0.328841
2019-01-20 18:30:00	0.744	355.108	1.894	15.7045	1.38267	10.8363	1.63833	356.622	26.46	979.314	22.697	-0.299282
2019-01-20 18:45:00	0	0.0976235	1.38267	6.96727	0.375667	10.8363	0.375667	1.6596	26.46	979.017	22.7653	-0.251249
2019-01-20 19:00:00	0.372	0.0976235	1.127	7.5529	0.751333	10.8363	0.751333	335.34	26.46	979.165	22.9704	-0.288198
2019-01-20 19:15:00	1.37133	85.6409	1.63833	332.521	1.38267	10.8119	1.38267	323.527	26.46	979.314	23.1072	-0.251249
2019-01-20 19:30:00	1.882	85.5921	1.894	318.024	1.38267	10.7875	1.63833	321.965	26.46	979.017	23.3123	-0.262334
2019-01-20 19:45:00	2.13733	348.47	2.661	327.933	2.40533	10.7387	2.14967	323.722	26.46	979.017	23.3123	-0.314062
2019-01-20 20:00:00	1.62667	348.031	2.40533	336.817	1.63833	10.8363	1.894	321.306	26.46	979.017	23.5173	-0.280808
2019-01-20 20:15:00	1.62667	348.08	2.14967	336.817	1.63833	10.8363	1.894	327.774	26.46	979.017	23.7908	-0.269724
2019-01-20 20:30:00	0	348.226	0	336.841	0	10.8851	0	327.774	26.46	978.719	23.9959	-0.317757
2019-01-20 20:45:00	1.882	269.272	1.63833	197.946	1.38267	10.9339	2.14967	214.92	26.46	978.571	24.201	-0.299282
2019-01-20 21:00:00	2.39267	200.785	2.661	176.391	2.14967	106.177	2.661	194.048	26.46	978.422	23.93	-0.269724
2019-01-20 21:15:00	2.90333	199.325	2.661	182.059	2.14967	106.302	2.91667	212.335	26.46	978.719	23.657	-0.262334
2019-01-20 21:30:00	3.15867	189.345	3.17233	178.327	2.40533	106.363	3.17233	198.449	26.46	978.719	23.6544	-0.262334
2019-01-20 21:45:00	3.414	198.446	3.17233	188.77	2.661	107.338	3.428	206.573	26.46	978.422	24.1326	-0.214301
2019-01-20 22:00:00	3.66933	201.594	3.428	176.567	2.661	107.631	3.93933	207.012	26.46	978.422	24.4061	-0.0886763
2019-01-20 22:15:00	4.18	197.836	3.68367	178.129	2.91667	108.168	4.195	205.646	26.46	978.125	24.953	0.140404
2019-01-20 22:30:00	4.43533	198.129	4.45067	184.474	3.17233	110.755	4.45067	205.304	26.46	978.273	24.8505	2.06542
2019-01-20 22:45:00	4.69067	203.571	4.45067	191.918	3.93933	111.145	4.45067	208.77	26.46	978.422	25.0214	3.04086
2019-01-20 23:00:00	4.946	206.427	4.962	193.553	4.45067	111.487	4.962	214.7	26.46	978.422	27.209	3.77244
2019-01-20 23:15:00	4.946	206.206	5.21767	193.747	3.93933	111.437	4.962	215.138	26.46	978.422	26.867	4.40056
2019-01-20 23:30:00	5.45667	202.766	4.962	189.965	4.70633	111.755	5.21767	210.429	26.46	978.719	26.1493	7.68897
2019-01-20 23:45:00	5.96733	201.448	5.729	186.622	4.962	112.414	5.729	208.574	26.46	978.422	27.2774	9.11149
2019-01-21	6.22267	201.838	5.98467	186.915	5.47333	113.806	5.98467	208.989	26.46	978.422	28.0978	8.73461
2019-01-21 00:15:00	5.96733	212.675	4.45067	195.701	4.195	113.928	5.98467	225.927	26.46	978.125	29.0549	7.17169
2019-01-21 00:30:00	5.96733	223.218	4.70633	206.098	3.93933	114.562	5.98467	225.829	26.46	977.827	29.3967	8.35774
2019-01-21 00:45:00	6.478	225.756	4.962	206.562	4.70633	115.148	6.24033	227.05	26.46	977.678	30.2854	9.84307
2019-01-21 01:00:00	6.478	212.528	4.45067	206.537	4.195	115.734	5.98467	220.265	26.46	977.232	31.9945	8.96739
2019-01-21 01:15:00	6.73333	223.999	4.962	208.88	4.45067	116.027	6.75167	231.809	26.46	976.935	32.1996	8.93783
2019-01-21 01:30:00	6.478	222.559	4.70633	223.377	3.428	117.344	5.729	234.542	26.46	976.935	31.5843	9.46989
2019-01-21 01:45:00	5.712	213.553	3.68367	194.627	3.428	118.174	5.21767	222.095	26.46	976.638	31.7211	8.88241
2019-01-21 02:00:00	5.712	208.721	3.428	190.82	3.17233	118.345	5.729	221.802	26.46	976.638	31.6527	8.91936
2019-01-21 02:15:00	7.244	206.134	6.24033	197.141	4.70633	119.004	7.00733	220.582	26.46	976.638	32.4731	11.9787
2019-01-21 02:30:00	6.73333	224.17	5.21767	209.124	5.47333	120.176	6.75167	213.944	26.46	976.34	33.2251	16.6711
2019-01-21 02:45:00	7.49933	208.404	6.24033	190.942	5.729	122.348	7.77433	218.044	26.46	976.043	33.8404	17.8092
2019-01-21 03:00:00	7.244	212.064	7.00733	203.633	6.24033	123.592	7.263	211.65	26.46	975.746	34.6607	17.0997
2019-01-21 03:15:00	7.75467	210.795	5.98467	199.045	4.962	123.641	7.00733	217.458	26.46	975.448	36.028	17.1441
2019-01-21 03:30:00	5.712	201.448	5.21767	198.386	4.70633	123.983	5.98467	218.02	26.46	975.151	36.5749	14.3323
2019-01-21 03:45:00	6.478	197.543	6.24033	201.07	4.962	124.251	6.496	208.843	26.46	974.854	36.8484	17.048
2019-01-21 04:00:00	6.98867	209.599	5.98467	205.781	5.729	124.471	7.00733	211.186	26.46	974.854	36.0964	20.0371
2019-01-21 04:15:00	5.96733	207.647	5.98467	187.989	4.962	124.715	6.24033	207.086	26.46	974.854	35.9597	22.1432
2019-01-21 04:30:00	7.244	202.961	5.47333	192.284	5.47333	124.91	7.00733	206.646	26.46	974.556	36.78	20.7318
2019-01-21 04:45:00	6.73333	203.205	5.98467	191.137	4.70633	125.106	6.75167	212.357	26.46	974.259	36.8142	18.5223
2019-01-21 05:00:00	6.22267	196.811	5.47333	182.034	5.21767	125.301	5.729	212.699	26.46	974.259	36.7458	16.8189
2019-01-21 05:15:00	6.22267	195.566	5.47333	180.447	5.47333	125.545	5.98467	212.479	26.46	973.961	37.7371	16.5012
2019-01-21 05:30:00	6.478	193.052	6.24033	175.908	5.98467	125.984	6.496	198.299	26.46	973.961	38.831	18.1491
2019-01-21 05:45:00	6.22267	198.324	5.47333	176.42	4.962	127.619	5.98467	199.837	26.46	973.813	39.2411	18.7698
2019-01-21 06:00:00	4.946	188.073	5.729	168.439	4.962	128.352	5.47333	192.784	26.46	973.664	39.3095	15.6588
2019-01-21 06:15:00	4.69067	174.552	5.98467	163.851	3.93933	128.474	4.70633	189.708	26.46	973.664	39.3095	13.1684
2019-01-21 06:30:00	5.712	182.509	4.962	182.253	4.962	128.791	5.21767	196.542	26.46	973.813	39.5488	13.464
2019-01-21 06:45:00	5.712	184.022	4.70633	166.999	5.21767	129.206	5.47333	196.542	26.46	973.664	40.4717	12.3703
2019-01-21 07:00:00	5.45667	175.431	3.68367	177.421	3.428	129.401	5.729	193.857	26.46	973.664	40.1299	13.6931
2019-01-21 07:15:00	5.20133	197.079	4.70633	185.206	4.195	129.67	5.47333	206.72	26.46	973.664	40.4033	9.57704
2019-01-21 07:30:00	5.45667	199.593	4.70633	192.26	3.68367	129.572	5.47333	209.868	26.46	973.664	40.1641	4.33405
2019-01-21 07:45:00	4.946	199.642	3.93933	181.204	4.70633	129.718	4.962	196.957	26.46	973.664	39.8564	4.50032
2019-01-21 08:00:00	5.20133	200.081	4.962	174.224	4.195	129.792	4.962	197.47	26.46	973.961	39.583	8.66072
2019-01-21 08:15:00	5.20133	170.696	5.21767	156.651	4.45067	129.621	5.47333	183.265	26.46	974.259	41.087	12.0526
2019-01-21 08:30:00	5.96733	159.796	4.195	142.017	4.45067	129.56	5.729	165.629	26.46	974.048	46.2101	13.6488
2019-01-21 08:45:00	5.712	161.81	4.45067	154.155	4.45067	129.97	6.24033	170.569	26.46	973.961	44.1152	11.2582
2019-01-21 09:00:00	2.648	168.515	4.70633	147.125	4.195	129.894	3.428	198.866	26.46	974.556	42.0981	7.93653
2019-01-21 09:15:00	2.648	152.765	3.68367	130.618	3.68367	129.979	2.661	164.377	26.46	974.853	39.6341	6.41425
2019-01-21 09:30:00	3.66933	153.241	3.93933	138.875	3.68367	129.9	3.68367	191.46	26.46	975.175	40.3081	7.21234
2019-01-21 09:45:00	2.648	153.312	4.70633	145.775	4.45067	135.654	2.91667	172.043	26.46	975.446	40.3074	6.99804
2019-01-21 10:00:00	3.92467	158.457	3.93933	145.116	4.195	135.19	4.45067	170.798	26.46	975.743	39.5558	5.65681
2019-01-21 10:15:00	3.414	180.894	4.195	158.261	4.195	135.445	3.68367	184.796	26.46	975.743	39.1351	5.19126
2019-01-21 10:30:00	3.15867	149.797	4.962	144.987	4.195	135.169	2.40533	168.108	26.46	975.98	37.2887	5.28363
2019-01-21 10:45:00	3.66933	171.058	3.93933	154.715	4.70633	137.851	3.68367	191.684	26.46	975.747	35.9911	3.95718
2019-01-21 11:00:00	3.92467	157.199	3.93933	152.168	4.70633	140.133	3.93933	175.581	26.46	975.742	35.3059	3.77613
2019-01-21 11:15:00	3.414	188.385	3.93933	186.765	4.70633	143.629	3.428	195.82	26.46	975.722	31.8198	2.44968
2019-01-21 11:30:00	2.39267	177.465	3.68367	168.483	4.962	144.239	2.14967	165.91	26.46	975.344	32.9124	2.09498
2019-01-21 11:45:00	1.882	196.195	2.40533	185.702	4.195	144.295	2.14967	153.632	26.46	975.353	33.2553	2.67137
2019-01-21 12:00:00	2.13733	155.336	4.195	144.99	5.21767	144.462	2.14967	160.332	26.46	974.949	33.5282	2.01369
2019-01-21 12:15:00	3.92467	174.374	3.428	179.556	4.45067	144.973	4.195	176.128	26.46	974.765	34.0059	2.47185
2019-01-21 12:30:00	3.92467	173.013	3.93933	154.159	4.962	146.463	3.428	181.08	26.46	974.525	34.2116	1.69593
2019-01-21 12:45:00	3.92467	180.148	4.962	183.062	4.195	148.774	4.195	189.313	26.46	974.237	31.9567	1.61095
2019-01-21 13:00:00	2.90333	125.81	3.93933	154.15	3.428	149.68	3.68367	166.623	26.46	974.137	31.2737	1.66268
2019-01-21 13:15:00	4.69067	185.585	5.21767	176.53	4.45067	150.895	4.70633	185.536	26.46	973.761	30.8985	1.39665
2019-01-21 13:30:00	3.414	207.719	4.962	185.452	4.195	154.016	3.428	202.575	26.46	973.854	29.2937	1.23777
2019-01-21 13:45:00	3.15867	185.85	3.428	170.336	3.93933	155.699	3.428	198.262	26.46	973.874	29.3276	0.997608
2019-01-21 14:00:00	2.648	184.29	4.962	164.314	4.195	157.475	3.17233	186.752	26.46	973.839	28.747	-0.107151
2019-01-21 14:15:00	3.66933	210.86	2.14967	170.238	2.14967	157.377	3.428	214.346	26.46	973.884	29.6688	-0.232775
2019-01-21 14:30:00	3.66933	172.3	3.93933	166.975	4.195	160.891	3.68367	186.219	26.46	973.763	29.2257	-0.0369484
2019-01-21 14:45:00	2.13733	203.014	2.661	189.864	3.93933	161.743	2.661	204.72	26.46	973.51	28.8157	-0.177353
2019-01-21 15:00:00	2.90333	179.929	2.91667	184.818	2.661	162.84	3.428	187.73	26.46	973.566	30.1132	-0.210606
2019-01-21 15:15:00	3.414	198.331	3.93933	181.622	4.45067	165.276	3.68367	202.914	26.46	973.603	30.1128	-0.206911
2019-01-21 15:30:00	4.69067	168.007	5.47333	153.663	4.962	156.014	4.195	185.218	26.46	973.646	30.5568	-0.173658
2019-01-21 15:45:00	3.66933	174.816	2.91667	173.587	3.428	162.505	3.68367	184.957	26.46	973.661	29.9093	0.0147794
2019-01-21 16:00:00	2.90333	174.08	3.93933	159.395	3.17233	166.132	3.17233	189.537	26.46	973.365	30.3224	-0.0702021
2019-01-21 16:15:00	3.15867	173.642	4.195	170.319	4.195	170.448	3.17233	183.273	26.46	973.068	29.8788	0.173658
2019-01-21 16:30:00	3.414	171.667	3.68367	165.442	4.195	160.964	3.428	177.811	26.46	972.812	30.2544	0.561616
2019-01-21 16:45:00	3.15867	163.656	4.45067	162.48	4.195	160.292	3.68367	173.507	26.46	972.47	30.6661	2.20952
2019-01-21 17:00:00	3.92467	157.017	3.68367	151.211	3.93933	164.529	3.93933	166.48	26.46	972.326	31.9039	3.92023
2019-01-21 17:15:00	5.20133	157.214	5.98467	145.775	4.962	153.019	5.47333	161.994	26.46	971.88	34.0222	6.90197
2019-01-21 17:30:00	4.69067	159.556	5.47333	155.262	5.21767	160.921	5.21767	168.384	26.46	971.286	35.3886	6.98695
2019-01-21 17:45:00	5.20133	169.514	4.962	164.98	4.962	156.756	4.962	170.661	26.46	971.526	36.4203	4.33405
2019-01-21 18:00:00	5.45667	175.156	5.21767	163.451	4.45067	165.252	4.962	182.841	26.46	971.583	37.1051	4.48185
2019-01-21 18:15:00	4.18	173.386	3.68367	165.999	3.17233	172.212	4.45067	183.508	26.46	971.555	38.064	3.54336
2019-01-21 18:30:00	3.15867	192.108	2.661	179.915	2.40533	171.174	3.17233	202.355	26.46	971.576	39.5011	1.67746
2019-01-21 18:45:00	3.66933	181.519	3.428	160.007	2.40533	164.49	3.93933	185.545	26.46	971.434	39.9111	1.44838
2019-01-21 19:00:00	3.414	174.322	3.428	169.619	1.63833	162.147	3.93933	184.471	26.46	971.285	40.6287	1.18605
2019-01-21 19:15:00	2.90333	184.984	3.68367	161.153	3.68367	155.902	3.17233	193.059	26.46	970.988	40.7996	1.43729
2019-01-21 19:30:00	3.66933	181.411	3.68367	165.144	3.428	149.277	3.93933	185.583	26.46	970.988	40.2558	2.19843
[truncated: 68,177 more rows]
