# Supplementary material
Source: PeerJ journal article supplement (doi:10.7717/peerj-cs.3610)
Supplement: Wind_farm_site_4_Nominal_capacity66MW.xlsx [file Wind_farm_site_4_Nominal_capacity66MW.xlsx]

## Sheet: sheet1
Time(year-month-day h:m:s)	Wind speed at height of 10 meters (m/s)	Wind direction at height of 10 meters (˚)	Wind speed at height of 30 meters (m/s)	Wind direction at height of 30 meters (˚)	Wind speed at height of 50 meters (m/s)	Wind direction at height of 50 meters (˚)	Wind speed - at the height of wheel hub (m/s)	Wind speed - at the height of wheel hub (˚)	Air temperature (°C)	Atmosphere (hpa)	Relative humidity (%)	Power (MW)
2019-01-01	4.41	19.81	5.07	21.76	7.52	179.1	0	209.2	-2.25	898	100	15.806
2019-01-01 00:15:00	4.4	19.79	5.06333	21.75	7.29333	179.1	0	209.2	-2.24	898	100	16.6993
2019-01-01 00:30:00	4.83333	19.79	5.56333	21.75	7.56667	179.1	0	209.2	-2.24	898	100	15.8407
2019-01-01 00:45:00	4.78	19.79	5.5	21.75	7.6	179.1	0	209.2	-2.29	898	100	14.8873
2019-01-01 01:00:00	4.34	19.79	5	21.75	7.12	179.1	0	209.2	-2.34333	898	100	14.8653
2019-01-01 01:15:00	4.2	19.8033	4.83667	21.7567	5.93333	179.1	0	209.2	-2.41	898	100	14.2593
2019-01-01 01:30:00	3.94	19.81	4.53	21.76	5.18667	179.1	0	209.2	-2.46333	898	99.8	12.1507
2019-01-01 01:45:00	3.5	19.81	4.03667	21.76	5.784	179.1	0	209.2	-2.688	898	99.5	12.2147
2019-01-01 02:00:00	3.364	19.81	3.882	21.76	5.89	179.1	0	209.2	-2.822	898	99.68	13.5287
2019-01-01 02:15:00	3.75333	19.81	4.31667	21.76	6.27667	179.1	0	209.2	-2.97333	898	99.7333	14.7727
2019-01-01 02:30:00	4.06	19.81	4.67	21.76	6.45667	179.1	0	209.2	-3.04667	898	99.5667	16.0467
2019-01-01 02:45:00	4.57667	19.81	5.27667	21.76	7.29333	179.1	1.27	209.2	-3.2	898	99.3667	16.93
2019-01-01 03:00:00	4.41	19.81	5.08333	21.76	7.71333	179.1	6.19	209.2	-3.33333	897	99.2333	16.156
2019-01-01 03:15:00	4.15	19.81	4.77333	21.76	7.09333	179.1	6.97	209.2	-3.40333	897	99.4333	16.4653
2019-01-01 03:30:00	4.29	19.81	4.93333	21.76	6.88667	179.1	6.74333	209.2	-3.46333	897	99.3	16.5133
2019-01-01 03:45:00	4.15267	19.81	4.77533	21.76	6.778	179.1	6.652	209.2	-3.50533	897	98.8333	15.844
2019-01-01 04:00:00	4.50667	19.81	5.19333	21.76	6.77333	179.067	6.64667	209.133	-3.48667	897	98.4667	17.3093
2019-01-01 04:15:00	5.04667	19.81	5.80333	21.76	8.19333	179.067	7.84	209.2	-3.5	897	98.3	16.91
2019-01-01 04:30:00	4.82	19.81	5.55	21.76	8.00667	179.1	8	209.2	-3.54667	897	98.2333	16.65
2019-01-01 04:45:00	4.26	19.81	4.9	21.76	6.96333	179.033	6.86	209.2	-3.61	897	98.8667	16.6807
2019-01-01 05:00:00	4.78	19.81	5.50667	21.76	7.15	179	7.06667	209.2	-3.51667	896	99	16.83
2019-01-01 05:15:00	4.66	19.81	5.36667	21.76	7.45667	179	7.41	209.2	-3.49	896	98.8667	16.4553
2019-01-01 05:30:00	4.73333	19.81	5.44667	21.76	8.21	179.1	7.98333	209.2	-3.51667	896	98.7	17.944
2019-01-01 05:45:00	4.76	19.81	5.48	21.76	8.14	179.1	8.43	209.2	-3.59	896	98.4333	18.8407
2019-01-01 06:00:00	4.90667	19.81	5.64	21.76	7.95333	179.067	8.13	209.2	-3.53	896	98.0333	18.318
2019-01-01 06:15:00	4.71333	19.81	5.42667	21.76	8.12667	179	8.36667	209.2	-3.59667	896	98.0333	18.1407
2019-01-01 06:30:00	4.74	19.81	5.46	21.76	7.78667	179	7.78667	209.2	-3.59667	896	98.3333	17.8173
2019-01-01 06:45:00	4.78667	19.81	5.50667	21.76	8.07333	179	8.19333	209.2	-3.66	896	98.4667	17.968
2019-01-01 07:00:00	4.88333	19.81	5.62	21.76	7.92667	179	8.16667	209.2	-3.66	896	98.2667	18.3333
2019-01-01 07:15:00	4.69333	19.81	5.40667	21.76	7.8	179.067	7.69333	209.133	-3.69333	896	98.0667	17.8267
2019-01-01 07:30:00	4.34667	19.81	5.00667	21.76	7.24667	179	7.41333	209.2	-3.72667	896	97.8667	17.036
2019-01-01 07:45:00	4.44667	19.81	5.12	21.76	6.13333	179	6.2	209.2	-3.59667	896	97.0333	16.728
2019-01-01 08:00:00	4.44	19.81	5.12	21.76	6.81333	179.1	6.71333	209.2	-3.62333	897	96.7	16.7427
2019-01-01 08:15:00	4.25	19.81	4.9	21.76	7.27667	179.033	7.23333	209.2	-3.66	897	96.5667	16.3667
2019-01-01 08:30:00	4.14333	19.81	4.76667	21.76	7.42333	179.1	7.33333	209.2	-3.82	897	97.3667	16.0767
2019-01-01 08:45:00	4.24	19.81	4.88667	21.76	7.21	179.1	6.99667	209.133	-3.69333	897	97.2	15.8513
2019-01-01 09:00:00	4.12	19.81	4.74667	21.76	6.73667	179.1	6.73	209.167	-3.44667	897	96.7333	17.62
2019-01-01 09:15:00	3.8	19.83	4.37333	21.7867	7.35	179.033	7.49667	209.1	-2.32	897	96.3667	17.718
2019-01-01 09:30:00	3.54667	19.81	4.08	21.76	6.75667	179.1	6.81	209.1	-1.41333	898	93.7	12.1967
2019-01-01 09:45:00	3.27333	19.81	3.76667	21.76	6.39333	179.1	6.39333	209.167	-0.91	898.667	91.8333	8.78533
2019-01-01 10:00:00	3.47333	19.77	3.99333	21.7267	6.45333	179.033	6.34	209.1	-0.676667	899	89.4333	8.25133
2019-01-01 10:15:00	3.63333	19.7833	4.18	21.74	6.30333	179.033	6.25	209.1	-1.11333	899.667	87.3667	7.89267
2019-01-01 10:30:00	4.06667	19.79	4.68	21.75	6.51667	179	6.23667	209.1	-1.02667	900	86.9667	8.57933
2019-01-01 10:45:00	4.13333	19.8133	4.75333	21.7667	6.78667	179	6.47333	209.1	-0.503333	900	86.9	8.738
2019-01-01 11:00:00	4.01333	19.76	4.61333	21.7	6.64	179	6.28667	209.167	-0.156667	900	85.9	7.81867
2019-01-01 11:15:00	3.86667	174.85	4.45667	192.13	6.49667	179	6.36667	209.167	-0.113333	900	86.0333	6.63667
2019-01-01 11:30:00	3.77333	194.01	4.33667	213.197	6.12333	70.1733	5.94	209.167	0.066667	899.667	85.7333	5.43333
2019-01-01 11:45:00	3.67333	33.15	4.23	36.4267	5.98	27.34	5.75	209.1	-0.333333	899	84.9	5.00333
2019-01-01 12:00:00	3.44	37.09	3.96333	40.7533	5.6	23.2867	5.37	209.133	-0.186667	899	84.6667	3.78467
2019-01-01 12:15:00	3.34667	50.1867	3.85667	55.1467	5.17667	25.9733	5.02	209.2	0.273333	899	83.2667	3.586
2019-01-01 12:30:00	3.26667	32.8	3.77	36.0467	5.01667	21.74	4.84333	209.2	0.033333	898.667	82.7333	3.22867
2019-01-01 12:45:00	3.23	5.04667	3.71667	5.53667	5.15667	20.98	5.08667	209.133	-0.013333	898	82.8	3.152
2019-01-01 13:00:00	3.12333	0.826667	3.59	0.896667	5.05	18.76	4.98667	209.2	0.153333	898	82.3667	4.02933
2019-01-01 13:15:00	3.57333	224.413	4.11333	246.607	5.51333	17.3733	5.19333	29.7433	0.906667	898	79.7133	4.626
2019-01-01 13:30:00	3.7	122.193	4.25333	134.273	5.73333	17.4867	5.46	29.45	0.966667	897	79.2133	4.12467
2019-01-01 13:45:00	3.60667	29.5133	4.15333	32.4233	5.56333	12.5333	5.29	27.1433	1.24333	897	78.7167	2.716
2019-01-01 14:00:00	3.18667	23.82	3.66667	26.17	5.05667	23.8933	4.98333	36.43	1.47	897	77.9667	1.55
2019-01-01 14:15:00	2.96	302.757	3.41333	332.7	4.75	22.57	4.53333	50.86	1.91	897	76.78	1.404
2019-01-01 14:30:00	3.02667	295.91	3.48	325.167	4.84333	29.0833	4.40667	48.0533	2.34333	896	74.16	1.17467
2019-01-01 14:45:00	2.90667	32.7433	3.34	35.9433	4.51333	12.8867	4.31333	25.4267	2.31	896	73.89	1.45533
2019-01-01 15:00:00	3.08	12.5433	3.54	13.7767	4.68	19.1933	4.26667	22.96	2.25	896	73.5233	1.78267
2019-01-01 15:15:00	3.20667	216.737	3.69333	238.17	4.82667	16.6133	4.37667	23.96	2.50333	896	72.83	2.672
2019-01-01 15:30:00	3.18	17.5633	3.66	19.29	4.88	17.2933	4.55667	16.24	2.49	896	72.98	2.87867
2019-01-01 15:45:00	2.90667	316.743	3.34333	348.067	5.08667	12.92	4.73667	24.7833	2.53667	896	74.1	2.804
2019-01-01 16:00:00	2.89333	119.85	3.33	131.7	5.37333	12.4	4.91	22.4967	2.67667	896.333	73.8933	3.03333
2019-01-01 16:15:00	2.77333	95.43	3.18667	104.867	5.23333	14.8667	4.89333	17.9	2.22	897	74.4867	3.764
2019-01-01 16:30:00	2.78	281.403	3.19333	309.233	5.3	16.1267	5.08667	29.02	1.59333	897	77.5933	4.29267
2019-01-01 16:45:00	2.97333	107.333	3.43	117.94	5.78333	16.1267	5.48	23.5867	0.646667	896.333	80.9067	5.202
2019-01-01 17:00:00	3.038	97.2293	3.49133	106.831	5.93667	17.434	5.70533	24.5433	0.012667	896	84.96	5.86533
2019-01-01 17:15:00	3.28	103.727	3.77667	113.98	6.22	16.5633	5.87333	17.6733	-0.436667	896	84.1667	6.20333
2019-01-01 17:30:00	3.14	144.053	3.61	158.293	6.07333	16.9233	6	23.84	-0.643333	896	85.2333	7.85933
2019-01-01 17:45:00	3.24667	60.27	3.73333	66.2267	6.20667	7.58	6.08333	26.8467	-0.933333	896	88.6	8.758
2019-01-01 18:00:00	3.08667	53.7633	3.56	59.08	5.82	13.4533	5.62333	17.3133	-1.1	896	88.3667	8.608
2019-01-01 18:15:00	2.90333	7.72333	3.34667	8.48	5.35	15.4367	5.26333	25.5633	-1.25333	896	87.9333	7.76133
2019-01-01 18:30:00	2.99	7.40333	3.44	8.12667	5.24333	9.55	5.15667	16.1567	-1.39333	896	88.0667	9.82467
2019-01-01 18:45:00	3.01333	8.98667	3.47333	9.86667	5.72	15.2567	5.68667	20.0433	-1.67333	896	89.6	10.8087
2019-01-01 19:00:00	3.17333	193.76	3.64667	212.927	5.38	40.0567	5.23333	20.2433	-1.74667	896	89.4	10.104
2019-01-01 19:15:00	3.14333	22.9633	3.61667	25.23	5.43333	10.8033	5.31	18	-1.77	896.667	89.2	11.476
2019-01-01 19:30:00	3.61667	27.3033	4.15667	30.0033	5.3	4.99667	5.21667	21.0667	-1.69	897	88.0667	10.724
2019-01-01 19:45:00	3.32667	40.6767	3.82667	44.6933	5.59	120.133	5.48667	20.7467	-1.69333	897	88.1	10.658
2019-01-01 20:00:00	3.3	70.5033	3.8	77.4733	5.34333	125.093	5.26667	12.94	-1.76	897	88.7	10.1133
2019-01-01 20:15:00	3.22	98.48	3.70333	108.213	5.54667	354.3	5.24	16.09	-1.78	897	88.8667	10.4373
2019-01-01 20:30:00	3.05333	105.167	3.51667	115.567	5.6	341.233	5.14	229.843	-1.82333	897	89.4333	9.86267
2019-01-01 20:45:00	3.02333	25.72	3.47667	28.2533	5.35333	233.847	5.21333	13.7733	-1.84	897	89.6333	9.94067
2019-01-01 21:00:00	3.36333	6.36	3.87	6.98667	5.34	231.847	5.26	8.52	-1.84667	897	89.2667	8.74467
2019-01-01 21:15:00	2.97333	124.843	3.42667	137.187	5.10667	9.52333	5.09333	14.63	-1.88	897	89.5667	7.66067
2019-01-01 21:30:00	3.00667	320.93	3.46	352.667	5.16667	11.8567	5.29333	26.5567	-1.92	897	89.5667	6.52
2019-01-01 21:45:00	3.17333	297.147	3.65	326.533	4.87333	223.55	4.77333	7.52333	-1.92333	897	89.3667	5.25133
2019-01-01 22:00:00	3.36	109.447	3.86333	120.267	4.70667	8.14333	4.79333	23.5033	-1.88333	897	89.0333	4.838
2019-01-01 22:15:00	3.12667	193.09	3.59333	212.18	4.85667	234.82	4.77333	9.47667	-1.89667	897	89.4	4.654
2019-01-01 22:30:00	3.05333	19.8767	3.51333	21.8333	4.39667	11.0333	4.43333	13.3033	-1.92333	897	89.5333	4.57067
2019-01-01 22:45:00	3.03333	214.927	3.49	236.17	4.46667	8.63	4.51333	13.1167	-1.94	897	89.5333	3.84933
2019-01-01 23:00:00	3	10.0133	3.45	10.9967	4.30667	0.15	4.31333	12.45	-1.97333	897	89.5667	3.32
2019-01-01 23:15:00	3.00667	12.3833	3.46667	13.6067	4.46	243.587	4.37333	7.98	-2.03333	897	89.7333	2.684
2019-01-01 23:30:00	3.00667	229.893	3.46667	252.628	4.312	265.769	4.25867	6.852	-2.05467	897	89.62	1.54933
2019-01-01 23:45:00	2.89667	312.2	3.32667	343.067	3.98	2.80667	3.72	10.2033	-2.09333	897	90.1	0.949333
2019-01-02	3.05667	281.74	3.51333	309.6	4.09333	237.56	3.82	6.25	-2.07333	897	89.6	1.12
2019-01-02 00:15:00	3	111.547	3.45333	122.573	4.04	10.34	3.99667	22.5	-2.04667	897	89.6	1.088
2019-01-02 00:30:00	2.77467	87.1653	3.19067	95.7787	4.04267	11.876	4.02933	18.9687	-2.07667	897	90.0667	1.90267
2019-01-02 00:45:00	3.16667	104.747	3.64	115.1	4.11333	353.4	3.93667	10.3667	-2.16333	897	90.7667	2.436
2019-01-02 01:00:00	3.06667	115.747	3.52667	127.187	4.46667	354.533	4.46333	4.57333	-2.21	897	91.6333	1.63867
2019-01-02 01:15:00	2.96667	201.937	3.41	221.903	4.09667	130.387	4.05333	10.24	-2.19333	897	91.4333	1.35333
2019-01-02 01:30:00	3.192	4.63	3.66733	5.07533	4.03667	168.735	3.88	18.8253	-2.16933	897	90.7933	0.559333
2019-01-02 01:45:00	3.1	108.263	3.57	118.967	3.85667	0.293333	3.7	5.11333	-2.15333	897	90.6	0.318667
2019-01-02 02:00:00	3.14	112.09	3.61	123.167	3.69	5.70667	3.58667	11.0933	-2.14	897	90.3	0
2019-01-02 02:15:00	2.81333	319.66	3.23333	351.267	3.35333	237.983	2.99667	4.90333	-2.19333	897	90.8	0
2019-01-02 02:30:00	2.74	316.313	3.15333	347.6	2.96333	3.15667	2.37667	7.10667	-2.24	897	91.0667	0
2019-01-02 02:45:00	2.27667	307.19	2.62	337.567	2.47667	3.06667	1.91667	2.94	-2.32	897	92	0
2019-01-02 03:00:00	2.43667	298.39	2.8	327.9	2.69667	0.826667	2.03	0.2	-2.28667	897	91.6667	0
2019-01-02 03:15:00	2.33333	316.8	2.68667	348.133	2.62667	236.387	1.72667	47.7933	-2.24667	896.333	91.3667	0
2019-01-02 03:30:00	2.05333	312.073	2.37333	342.933	2.46667	3.66	1.74667	2.28667	-2.19333	896	90.9	0
2019-01-02 03:45:00	2.08	310.61	2.39667	341.333	2.42	32.6133	1.40667	122.647	-2.14	896	90.2	0
2019-01-02 04:00:00	2.11333	110.537	2.43667	121.467	2.42	1.49333	1.75333	119.08	-2.16667	896	91.0333	0
2019-01-02 04:15:00	2.09333	217.497	2.40667	239.007	2.46	10.6933	1.89	3.14	-2.33333	896	93	0
2019-01-02 04:30:00	1.88667	217.497	2.16667	239.007	2.26	9.86667	1.29667	2.78	-2.50667	896	94.9333	0
2019-01-02 04:45:00	2.3	208.23	2.64667	228.817	2.62333	2.27333	2.23667	27.3533	-2.53333	895.333	94.7333	0
2019-01-02 05:00:00	2.58	216.597	2.96667	238.017	2.97	1.56	2.69	22.84	-2.52	895	94.4	0
2019-01-02 05:15:00	2.54333	242.027	2.92667	265.967	2.87	124.193	2.71667	11.24	-2.5	895	94.1667	0
2019-01-02 05:30:00	2.39	221.34	2.74667	243.233	3.08333	119.953	2.96333	17.4733	-2.50667	895	94.5333	0
2019-01-02 05:45:00	2.21667	285.48	2.55	313.7	2.71	1.56	2.53333	24.15	-2.45333	895	93.9	0
2019-01-02 06:00:00	2.07	307.013	2.37667	337.367	2.26333	239.393	1.82	26.2433	-2.42667	895	93.5	0
2019-01-02 06:15:00	2.05333	305.583	2.36333	335.8	2.19667	235.953	1.37333	356.8	-2.39333	895	93.4333	0
2019-01-02 06:30:00	1.75333	318.563	2.03	350.067	1.77	237.22	0.293333	332.9	-2.36667	895	93.5	0
2019-01-02 06:45:00	0.546667	312.107	0.636667	342.967	0.02	356.9	0.246667	219.1	-2.32667	895	92.6	0
2019-01-02 07:00:00	0.453333	311.68	0.53	342.5	0	257.033	0.6	176.833	-2.31333	894	92.6	0
2019-01-02 07:15:00	0.29	311.68	0.34	342.5	0.1	198.733	1.16667	168.467	-2.24667	894	92.1667	0
2019-01-02 07:30:00	0.41	311.68	0.48	342.5	0.793333	182.067	1.8	184.4	-2.13333	895	92.3667	0
2019-01-02 07:45:00	1.31333	165.297	1.50667	181.633	1.9	190.233	2.30667	186.567	-1.77333	895	94.0667	0
2019-01-02 08:00:00	1.85333	168.077	2.13333	184.7	2.32667	194.567	2.57333	190.867	-1.60667	895	94.4	0
2019-01-02 08:15:00	1.68	167.267	1.93	183.8	2.2	196.933	2.64667	186.5	-1.61333	895	94.9	0
2019-01-02 08:30:00	2.076	157.448	2.386	173.02	2.672	184.54	3.256	185.44	-1.614	895	95.3	0
2019-01-02 08:45:00	2.54667	160.833	2.93333	175.46	3.102	176.16	3.47	181.14	-1.638	895	95.5667	0
2019-01-02 09:00:00	2.48667	158.833	2.86667	174.533	3.02667	179.3	3.39667	180.767	-1.65	895	95.8	0
2019-01-02 09:15:00	2.46	161.283	2.83667	177.233	2.94667	171.967	3.37667	176.1	-1.65	895	96.0333	0
2019-01-02 09:30:00	2.19333	166.863	2.52333	183.367	2.59333	178.967	3.13	186.033	-1.65667	895	97	0
2019-01-02 09:45:00	1.77	161.01	2.03667	176.933	2.23333	180.567	2.87333	187.867	-1.60333	895	98.3	0
2019-01-02 10:00:00	1.83667	178.783	2.11667	196.467	2.28667	183.767	2.65333	189.267	-1.50333	896	98.9	0
2019-01-02 10:15:00	2.20667	145.693	2.54667	160.1	2.55	181.667	2.9	191.333	-1.41	896	99.1	0
2019-01-02 10:30:00	2.10667	156.307	2.42667	171.767	2.47	189.467	2.72	188.067	-1.39	896	99.5	0
2019-01-02 10:45:00	1.90667	171.027	2.19667	187.933	2.33333	190.733	2.39667	183.067	-1.33667	896	99.8	0
2019-01-02 11:00:00	2.33333	146.873	2.68333	161.4	2.83333	188.133	2.81	200.133	-1.35667	896	99.8	0
2019-01-02 11:15:00	2.26	173.477	2.6	190.633	2.80333	198.667	3.05	191.533	-1.31667	896	99.8667	0
2019-01-02 11:30:00	2.7	168.81	3.10667	185.5	3.42333	204.4	3.71	205.6	-1.26333	895.667	99.9	0
2019-01-02 11:45:00	2.30333	161.16	2.64667	177.1	2.92333	194.667	3.09333	202.867	-1.21	895	99.7	0
2019-01-02 12:00:00	1.362	157.242	1.56533	172.787	1.822	177.187	1.71733	186.66	-1.19933	895	99.6	0
2019-01-02 12:15:00	1.38	170.843	1.59	187.733	1.54667	199.967	1.91667	189.233	-1.18	895	99.5333	0
2019-01-02 12:30:00	1.47333	160.897	1.69667	176.8	1.84	198.767	2.19	199.433	-1.10667	894.667	99.4	0.008667
2019-01-02 12:45:00	1.92	151.05	2.21467	165.98	2.26733	186.087	2.61333	189.533	-1.08	894	99.2133	0
2019-01-02 13:00:00	1.86	155.097	2.14667	170.433	2.12	190.667	2.53	175.2	-1.04667	894	99.1333	0
2019-01-02 13:15:00	2.52667	174.023	2.90333	191.233	3.2	188.7	3.52	192.633	-1.01667	894	99.2667	0
2019-01-02 13:30:00	2.62667	163.53	3.01667	179.7	3.17333	178.3	3.42	195.467	-1.01667	893.667	99.6	0
2019-01-02 13:45:00	2.56	162.28	2.95	178.333	3.05333	185.2	3.27333	188.1	-0.996667	893	100	0
2019-01-02 14:00:00	2.29333	161.133	2.63667	177.067	2.85333	187.2	2.87333	192.7	-0.976667	893	100	0
2019-01-02 14:15:00	2.8	143.207	3.22	157.367	3.31333	194.1	3.51	198.367	-0.946667	893	100	0
2019-01-02 14:30:00	2.26667	160.313	2.61333	176.167	2.8	195.9	3.08333	216.7	-0.886667	893	100	0
2019-01-02 14:45:00	1.82	159.437	2.10333	175.2	2.1	179.633	2.22333	180.8	-0.776667	893	99.8667	0
2019-01-02 15:00:00	1.56	161.93	1.79667	177.933	1.82667	189.567	2.17	189.333	-0.696667	892	99.5	0
2019-01-02 15:15:00	1.18	154.307	1.36667	169.567	1.71667	213.8	1.77333	189.1	-0.58	892	99.2	0
2019-01-02 15:30:00	1.35333	174.933	1.56	192.233	1.84333	192.733	2.26	192.9	-0.54	892	98.9	0
2019-01-02 15:45:00	1.36333	159.857	1.56667	175.667	1.77	190.033	2.12	185.6	-0.47	892	98.3333	0
2019-01-02 16:00:00	1.67667	171.33	1.93333	188.267	1.99	185.3	2.19333	179.467	-0.41	892	97.5333	0
2019-01-02 16:15:00	1.53	165.59	1.77	181.967	1.91667	183.467	2.53333	185.133	-0.383333	892	97.2	0
2019-01-02 16:30:00	1.51667	162.01	1.75	178.033	1.91	187.467	2.56	183.533	-0.316667	892	96.8667	0
2019-01-02 16:45:00	1.75267	163.283	2.01867	179.427	2.032	178.613	2.53267	179.2	-0.3	892	96.46	0
2019-01-02 17:00:00	1.67	158.89	1.92667	174.6	2.05333	172.8	2.42333	176.8	-0.293333	892	95.9	0
2019-01-02 17:15:00	1.46	159.857	1.68333	175.667	1.87	187	2.22667	187.833	-0.246667	892.667	95.4	0
2019-01-02 17:30:00	1.07333	142.623	1.24333	156.733	1.31	194.333	1.88667	197.767	-0.213333	893	95.2	0
2019-01-02 17:45:00	1.19	176.203	1.38	193.633	1.75667	210.867	2.22	210.867	-0.233333	893	95.7	0
2019-01-02 18:00:00	1.73	176.75	2	194.233	2.46667	207	2.64667	198.467	-0.273333	893	95.9333	0
2019-01-02 18:15:00	1.76	166.38	2.03	182.833	2.45	207.6	2.46	198.4	-0.29	893	95.9	0
2019-01-02 18:30:00	1.34667	180.393	1.55667	198.233	2.17	212.267	2.22	204.5	-0.303333	893	96	0
2019-01-02 18:45:00	1.31333	171.813	1.52	188.8	2.14667	215.9	2.13667	210.1	-0.373333	893	96.7	0
2019-01-02 19:00:00	1.74	176.007	2.01333	193.4	2.66	222.433	2.53667	225.067	-0.393333	894	96.5	0
2019-01-02 19:15:00	1.92333	173.993	2.21333	191.2	2.91333	225.9	2.83667	218.767	-0.42	894	96.1	0
2019-01-02 19:30:00	2.15	174.113	2.47333	191.333	3.06667	228	3.06333	219.333	-0.453333	894	96.1667	0
2019-01-02 19:45:00	2.04	165.14	2.34667	181.467	3.06333	222.433	3	218.133	-0.463333	894	96.1	0
2019-01-02 20:00:00	2.10667	170.293	2.43333	187.133	3.17667	228.367	3	224	-0.47	894	96.2333	0
2019-01-02 20:15:00	2.05667	168.907	2.36667	185.6	3.30333	232.667	3.22667	234.967	-0.483333	894	96.3667	0
2019-01-02 20:30:00	2.05667	177.333	2.36667	194.867	3.35	235.8	3.10667	241.967	-0.476667	894	96.5	0
2019-01-02 20:45:00	1.86333	177.447	2.14	195	2.85	234.1	2.72667	222.533	-0.433333	894	96.0333	0
2019-01-02 21:00:00	1.25	179.333	1.44667	197.067	2.07667	239.167	2.08	235.867	-0.44	894	96.1	0
2019-01-02 21:15:00	1.07333	171.44	1.23667	188.4	1.87	229.9	2.12333	235.4	-0.49	894	96.3333	0
2019-01-02 21:30:00	1.364	175.76	1.578	193.14	2.384	224.7	2.458	224.84	-0.56	894	96.84	0
2019-01-02 21:45:00	1.56	159.973	1.79333	175.8	2.58	221.2	2.75333	223.1	-0.583333	894	97.0667	0
2019-01-02 22:00:00	2.02	161.26	2.32	177.2	3.06	215.667	3.06	223.767	-0.536667	894	96.9	0
2019-01-02 22:15:00	1.98667	165.96	2.28667	182.367	3.08	221.4	3.21	228.033	-0.533333	894	96.9667	0
2019-01-02 22:30:00	1.99333	174.453	2.29333	191.7	2.92	215.933	2.95667	227.833	-0.533333	894	97.3333	0
2019-01-02 22:45:00	1.66667	176.233	1.92333	193.667	2.53	227	2.69	226.3	-0.543333	894	97.8333	0
2019-01-02 23:00:00	1.71333	166.593	1.97667	183.067	2.72333	237.467	2.77667	226.367	-0.556667	894	98.3	0
2019-01-02 23:15:00	1.34667	173.623	1.56	190.8	2.22333	223.8	2.50667	235.5	-0.57	894	98.8667	0
2019-01-02 23:30:00	1.52	176.057	1.74667	193.467	2.23	229.333	2.37333	221.9	-0.566667	893	99.0333	0
2019-01-02 23:45:00	1.94933	170.705	2.24	187.587	2.97133	219.6	2.862	222.907	-0.572	893	98.98	0
2019-01-03	2.10667	179.457	2.42	197.2	3.09333	221.367	2.87	213.367	-0.556667	893	98.7667	0
2019-01-03 00:15:00	2.41667	161.713	2.77667	177.7	3.51	222.833	3.36	221.467	-0.566667	893	98.7	0
2019-01-03 00:30:00	2.38333	194.593	2.73667	213.833	3.45	223.3	3.22	217.8	-0.52	894	98.6	0.102857
2019-01-03 00:45:00	2.24867	200.929	2.584	220.793	3.248	228.053	3.03467	223.233	-0.526	894	98.5	0
2019-01-03 01:00:00	1.99667	186.773	2.30667	205.233	3.04667	219.533	3.02	232.433	-0.53	894	98.6	0
2019-01-03 01:15:00	2.24667	179.087	2.58333	196.8	3.32333	229.133	3.11333	219.667	-0.56	894	98.8	0
2019-01-03 01:30:00	2.2	160.4	2.53667	176.267	3.17333	233.2	2.92667	221.267	-0.593333	894	99	0
2019-01-03 01:45:00	2.06333	208.48	2.37333	229.1	2.83667	218.033	2.95333	222.067	-0.61	894	99.3	0
2019-01-03 02:00:00	1.16333	203.02	1.34667	223.1	1.77667	234.567	2.23333	231.267	-0.623333	893.667	99.2333	0
2019-01-03 02:15:00	0.85	167.167	0.98	183.7	1.52333	226.4	2.04	222.333	-0.68	893	99.6	0
2019-01-03 02:30:00	0.903333	178.947	1.04	196.633	1.55	233	1.8	184.067	-0.68	893	99.9333	0
2019-01-03 02:45:00	0.54	155.707	0.626667	171.1	0.993333	214.367	1.91	201	-0.696667	893	99.9333	0
2019-01-03 03:00:00	0.866667	184.287	0.993333	202.5	1.47333	218.967	1.97	194.933	-0.743333	893	100	0
2019-01-03 03:15:00	1.24667	175.36	1.44333	192.7	1.91333	210.033	2.10667	208.633	-0.693333	893	100	0
2019-01-03 03:30:00	1.38667	178.333	1.59667	195.967	1.98	215.5	2.15333	213.167	-0.646667	893	100	0
2019-01-03 03:45:00	1.43333	170.813	1.65	187.7	2	216.167	2.45333	187.233	-0.64	893	100	0
2019-01-03 04:00:00	0.98	173.727	1.13667	190.9	1.48667	192.967	2.33333	207.367	-0.64	893	100	0
2019-01-03 04:15:00	0.833333	164.803	0.966667	181.1	1.04667	192.8	1.96333	207.7	-0.65	892.333	100	0
2019-01-03 04:30:00	0.18	181.423	0.213333	199.367	0.246667	210.733	0.943333	223.567	-0.663333	892	100	0
2019-01-03 04:45:00	0.1	169.773	0.116667	186.567	0.1	198.8	0.79	201.633	-0.676667	892	100	0
2019-01-03 05:00:00	0.046667	144.573	0.056667	158.867	0.08	194.6	0.87	175.7	-0.71	892	100	0
2019-01-03 05:15:00	0	144.52	0	158.8	0	192.5	0	175.7	-0.716667	892	100	0
2019-01-03 05:30:00	0	144.52	0	158.8	0	192.5	0.58	175.7	-0.75	892	100	0
2019-01-03 05:45:00	0	144.52	0	158.8	0	192.5	0.8	152.5	-0.78	891.5	100	0
2019-01-03 06:00:00	0.086667	215.553	0.1	236.867	0	192.5	0.12	152.5	-0.776667	891	100	0
2019-01-03 06:15:00	0.066667	272.54	0.08	299.5	0	192.5	0	152.5	-0.753333	891	100	0
2019-01-03 06:30:00	0.013333	272.48	0.013333	299.433	0	192.5	0	152.5	-0.76	891	100	0
2019-01-03 06:45:00	0.236	272.54	0.275333	299.5	0.223333	265.947	0.056667	152.5	-0.729333	891	100	0
2019-01-03 07:00:00	0.824	290.86	0.954	319.62	0.796	311.38	0.314	273.46	-0.74	891	100	0
2019-01-03 07:15:00	1.08667	314.86	1.26333	346	1	326.633	0.703333	350.067	-0.753333	891	100	0
2019-01-03 07:30:00	1.14	304.847	1.32333	335	0.92	342.233	0.363333	351.767	-0.786667	891	100	0
2019-01-03 07:45:00	0.713333	310.96	0.83	341.7	0.456667	349.1	0.226667	355	-0.783333	891	100	0
2019-01-03 08:00:00	1.19333	320.083	1.37	351.733	1.35	119.807	0.866667	118.953	-0.796667	891	100	0
2019-01-03 08:15:00	1.80667	319.261	2.08	350.833	2.168	2.388	1.68133	4.93	-0.834	891	100	0
2019-01-03 08:30:00	1.46667	322.36	1.7	354.233	2.09333	1.46	1.85333	16.2833	-0.863333	891	100	0
2019-01-03 08:45:00	1.38733	310.635	1.60533	341.36	2.174	7.802	1.46933	192.135	-0.849333	891	100	0
2019-01-03 09:00:00	1.14333	314.25	1.32667	345.333	1.51	3.08333	0.62	0.613333	-0.82	891	100	0
2019-01-03 09:15:00	0.746667	324.78	0.87	356.9	0.463333	105.633	0.04	222.3	-0.83	891.667	100	0
2019-01-03 09:30:00	0.453333	314.653	0.523333	345.767	0.003333	292.833	0.013333	198.9	-0.783333	892	100	0
2019-01-03 09:45:00	0.373333	316.14	0.436667	347.4	0.026667	24.43	0.046667	179.133	-0.74	892	100	0
2019-01-03 10:00:00	0.26	316.65	0.303333	347.967	0.006667	228.017	0.153333	163.033	-0.693333	892	100	0
2019-01-03 10:15:00	0.193333	316.59	0.226667	347.9	0	171.693	0	174.233	-0.653333	892	100	0
2019-01-03 10:30:00	0.033333	316.837	0.04	348.167	0	7.88	0	158.333	-0.586667	892	100	0
2019-01-03 10:45:00	0.06	316.95	0.076667	348.3	0.1	218.2	0.376667	194.367	-0.376667	892	100	0
2019-01-03 11:00:00	0.186667	220.777	0.216667	242.6	0.3	211.5	0.51	204.7	-0.29	892	100	0
2019-01-03 11:15:00	0.03	164.62	0.04	180.9	0.033333	208.267	0.033333	220.267	-0.226667	892	100	0
2019-01-03 11:30:00	0.15	164.597	0.18	180.867	0.233333	217.8	0.14	209.667	-0.166667	892	100	0
2019-01-03 11:45:00	0.096667	169.563	0.116667	186.333	0.146667	228.9	0.156667	201.967	-0.086667	892	99.6667	0
2019-01-03 12:00:00	0.003333	179.27	0.01	197	0.006667	216.233	0.05	207.867	0.06	892	99	0
2019-01-03 12:15:00	0.007333	179.27	0.01	197	0.007333	215.007	0.049333	219.8	0.112667	892	97.4133	0
2019-01-03 12:30:00	0.04	141.843	0.05	155.867	0	224.367	0.006667	219.667	0.243333	892	96.5667	0
2019-01-03 12:45:00	0.023333	136.443	0.023333	149.933	0.016667	186.267	0.076667	169.433	0.266667	892	96.0333	0
2019-01-03 13:00:00	0.015	163.07	0.02	179.2	0.01	123.665	0.02	152.9	0.41	891	96.7	0
2019-01-03 13:15:00	0.126667	6.96667	0.143333	7.65333	0.083333	129.767	0.056667	18.0033	0.376667	891	97.9667	0
2019-01-03 13:30:00	0.433333	218.82	0.503333	240.46	0.296667	351.167	0.083333	19.6033	0.163333	891	98.9667	0
2019-01-03 13:45:00	0.443333	204.577	0.523333	224.81	0.22	11.84	0.05	235.673	-0.003333	891	99.8667	0
2019-01-03 14:00:00	0.743333	23.4167	0.863333	25.73	0.7	12.8733	0.083333	9.7	-0.043333	890.667	100	0
2019-01-03 14:15:00	0.44	315.77	0.51	347	0.21	16.54	0	0.39	-0.12	890	100	0
2019-01-03 14:30:00	0.613333	110.003	0.713333	120.873	0.31	11.53	0	5.77333	-0.176667	890	100	0
2019-01-03 14:45:00	1.03333	8.17667	1.19	8.97667	1.19	14.4567	0	7.55667	-0.106667	890	100	0
2019-01-03 15:00:00	1.55333	21.8167	1.79667	23.9767	1.87667	15.9833	0	241.643	0.033333	890	100	0
2019-01-03 15:15:00	2.12	116.703	2.43667	128.247	2.82333	19.1067	0	2.42	0.106667	890	99.7	0
2019-01-03 15:30:00	2.012	187.04	2.322	205.534	2.77333	18.728	0	8.74533	0.244	890	99.2067	0
2019-01-03 15:45:00	2.07	218.533	2.38	240.147	3.4	11.0567	0	10.7	0.52	890	98.4667	0
2019-01-03 16:00:00	2.17	165.873	2.49333	182.28	3.85333	10.05	0	11.0267	0.62	890	98.2	1.09933
2019-01-03 16:15:00	2.13333	19.6133	2.45	21.5533	3.88667	11.8333	0	11.24	0.753333	890	97.9	1.808
2019-01-03 16:30:00	2.44	19.66	2.80333	21.6	4.31333	14.1333	0	11.22	0.673333	891	97.8	2.64267
2019-01-03 16:45:00	2.52667	2.38	2.91333	2.61	4.48667	12.1133	0	11.24	0.57	891	97.7333	2.69267
2019-01-03 17:00:00	2.82	218.533	3.24667	240.137	5.16	10.5267	0	11.5667	0.47	891	97.8333	3.40467
2019-01-03 17:15:00	3.22333	124.143	3.70667	136.42	5.37667	10.3167	0	11.68	0.256667	891	97.4	4.53867
2019-01-03 17:30:00	3.04333	111.75	3.5	122.793	5.07667	15.05	0	11.68	0.123333	891	97.5	4.45533
2019-01-03 17:45:00	2.68	25.8733	3.09	28.4233	4.38333	15.44	0	11.68	0.03	891	97.9333	5.40867
2019-01-03 18:00:00	2.36	194.42	2.71667	213.65	3.90333	16.5267	0	11.68	-0.01	891	98.3333	4.556
2019-01-03 18:15:00	3.21667	0.98	3.69667	1.07	5.57	343.2	0	11.6633	-0.066667	891	98.7667	5.00333
2019-01-03 18:30:00	3.91	0.98	4.50333	1.07	5.93667	123.673	0	11.1433	-0.106667	891	98.7667	12.558
2019-01-03 18:45:00	4.49333	0.966667	5.18	1.05333	7.88	17.25	0.816667	10.87	-0.153333	891	98.8	21.1213
2019-01-03 19:00:00	4.52667	0.94	5.20667	1.02	8.24	15.0433	6.38333	12.3233	-0.206667	891	99.1333	22.2633
2019-01-03 19:15:00	4.10667	0.94	4.72	1.02	7.23667	8.78333	7.30667	13.9	-0.313333	891	98.9	20.358
2019-01-03 19:30:00	3.72	0.94	4.28667	1.02	6.70333	14.6367	6.87333	14.92	-0.453333	891	98.7	20.39
2019-01-03 19:45:00	3.93333	0.94	4.53667	1.02	6.16	3.13	6.03	15.62	-0.543333	891.667	98.5333	17.1687
2019-01-03 20:00:00	3.32667	0.94	3.83667	1.02	5.77333	4.94333	5.59667	14.8067	-0.676667	891.667	98.3	12.9467
2019-01-03 20:15:00	3.43	0.94	3.94333	1.02	6.38333	22.6867	6.23667	11.8433	-0.873333	891.667	98.6667	16.0593
2019-01-03 20:30:00	3.6	0.94	4.14	1.02	6.715	13.135	6.61	12.31	-0.96	892	98.95	15.495
2019-01-03 20:45:00	3.86333	0.94	4.44	1.02	7.18667	20.76	7.26	14.9067	-1.01	891	98.9	16.56
2019-01-03 21:00:00	3.49	0.94	4.01333	1.02	6.64	23.6667	6.86667	15.62	-0.996667	892	99	15.768
2019-01-03 21:15:00	3.46733	0.94	4.00067	1.02	6.59733	15.588	6.68267	16.276	-0.919333	892	98.5667	14.6033
2019-01-03 21:30:00	4.04333	0.94	4.65	1.02	7.38667	18.9533	7.49333	16.9	-0.896667	892	97.9	17.2887
2019-01-03 21:45:00	4.24	0.94	4.88667	1.02	7.83667	13.3467	8.04	18.1333	-0.85	892	96.8	17.6673
2019-01-03 22:00:00	4.2	0.94	4.84	1.02	7.75	17.9067	7.75333	19.58	-0.896667	892	96.3667	19.416
2019-01-03 22:15:00	4.45667	0.94	5.13	1.02	8.28333	14.4933	8.39	20.3233	-1.02333	892	96.3667	21.4547
2019-01-03 22:30:00	4.43667	0.94	5.10333	1.02	8.11667	13.0133	8.35667	20.8433	-1.13	892	96.6	21.39
2019-01-03 22:45:00	4.56333	0.973333	5.24667	1.06333	8.58667	6.73333	8.65667	20.65	-1.40333	892	97.3667	21.3587
2019-01-03 23:00:00	4.55667	0.96	5.24667	1.05	8.4	4.10667	8.61667	19.1233	-1.44333	891	97.6667	23.674
2019-01-03 23:15:00	4.53	0.966667	5.21	1.05333	8.35	14.8833	8.38333	18.58	-1.55	891	97.7333	21.0453
2019-01-03 23:30:00	4.17	0.966667	4.79667	1.05333	7.49667	13.1033	7.55	18.9733	-1.57	891	97.7333	20.7727
2019-01-03 23:45:00	4.32	0.966667	4.98333	1.05667	7.67333	12.3767	8	19.1267	-1.54	891	96.9	21.1753
2019-01-04	4.084	0.98	4.712	1.07	7.11	220.368	7.378	18.32	-1.552	891	96.52	17.8393
2019-01-04 00:15:00	3.66667	0.98	4.22	1.07	6.51667	18.4967	6.70333	18.29	-1.60333	891	96	15.6573
2019-01-04 00:30:00	3.08667	0.98	3.56	1.07	5.63	7.35	5.94333	18.22	-1.74333	891	96.2333	13.176
2019-01-04 00:45:00	2.79667	0.98	3.21333	1.07	5.01333	6.31333	5.38333	18.2167	-1.91667	891	96.9667	9.66667
2019-01-04 01:00:00	2.87667	0.98	3.31333	1.07	4.94	8.90667	5.30333	18.1233	-1.87667	891.333	96.7	8.966
2019-01-04 01:15:00	3.13333	0.98	3.60667	1.07	5.01	5.90333	5.25333	17.6833	-1.92667	892	96.6333	9.98867
2019-01-04 01:30:00	3	0.98	3.45333	1.07	5.13667	24.3033	5.14	16.8367	-1.86	891.667	96.3333	9.02733
2019-01-04 01:45:00	2.77667	0.966667	3.19667	1.05667	4.61	5.35333	4.91333	16.1433	-1.81333	891.667	96.1	10.7107
2019-01-04 02:00:00	2.83667	0.953333	3.26333	1.03667	4.49667	239.2	4.96	15.5567	-1.72	892	96	11.4887
2019-01-04 02:15:00	3.04667	0.94	3.50667	1.02	4.90667	3.86	5.50333	15.3067	-1.49	892	95.1	11.1207
2019-01-04 02:30:00	2.96	0.94	3.41333	1.02	4.94667	6.81333	5.57	15.1533	-1.43667	892	95.0333	10.9247
2019-01-04 02:45:00	2.94667	0.94	3.39333	1.02	4.94667	5.76667	5.42	14.7667	-1.3	892	94.4333	11.214
2019-01-04 03:00:00	3.14667	0.94	3.63333	1.02	5.44	12.26	5.97333	14.94	-1.24	892	94.1667	10.7887
2019-01-04 03:15:00	3.43333	0.94	3.94667	1.02	5.92667	13.5233	6.27333	15.7433	-1.16667	892	93.6	10.6333
2019-01-04 03:30:00	3.11333	0.94	3.58	1.02	5.41333	11.3967	5.9	16.4567	-1.12	892	93.3333	12.1493
2019-01-04 03:45:00	3.10667	0.94	3.57667	1.02	5.36	10.1533	5.85667	16.47	-1.17	892	93.8	18.0953
2019-01-04 04:00:00	3.55333	0.94	4.09667	1.02	6.30667	4.83333	6.74333	15.79	-1.19	892	94.1667	26.21
2019-01-04 04:15:00	4.22667	0.94	4.86333	1.02	7.47	7.99667	7.58	14.73	-1.19667	892	94.3	31.2067
2019-01-04 04:30:00	4.72667	0.94	5.43667	1.02	8.29	16.0433	8.35333	14.2767	-1.22333	892	94.8	32.726
2019-01-04 04:45:00	4.83333	0.94	5.55667	1.02	8.93333	10.06	9.32333	13.43	-1.37	892	95.8333	32.7813
2019-01-04 05:00:00	5.11333	0.94	5.87667	1.02	9.25333	8.92667	9.67333	14.65	-1.42333	891.667	96.2667	32.262
2019-01-04 05:15:00	5.45333	0.94	6.28333	1.02	9.75	9.49	10.0467	15.9133	-1.35333	891	95.6	27.824
2019-01-04 05:30:00	4.29333	0.94	4.94333	1.02	7.93667	13.5167	8.68	18.5733	-1.32667	891	95.5667	24.3473
2019-01-04 05:45:00	3.69	0.94	4.24	1.02	7.02667	11.06	7.92	21.9167	-1.42667	891	96.2	26.0427
2019-01-04 06:00:00	4.01	0.94	4.61333	1.02	7.3	5.72667	7.93333	22.95	-1.38667	891.333	96.1333	25.2867
2019-01-04 06:15:00	4.05333	0.94	4.66667	1.02	7.1	9.05333	7.68667	19.3633	-1.24	892	95.3333	22.6887
2019-01-04 06:30:00	3.1	0.94	3.56667	1.02	5.61333	24.5067	6.16667	26.0167	-1.28	892	95.9333	22.3553
2019-01-04 06:45:00	2.98	0.94	3.42667	1.02	5.44667	22.9	6.17333	24.06	-1.34667	892	96.3	26.04
2019-01-04 07:00:00	3.46	0.94	3.98	1.02	6.26667	24.6067	7.05333	22.88	-1.34	892	96.4	25.5607
2019-01-04 07:15:00	3.39333	0.94	3.90667	1.02	6.54	10.17	7.19333	19.4533	-1.28	892	95.8667	25.668
2019-01-04 07:30:00	3.62667	0.94	4.17333	1.02	6.60667	7.43	7.05333	14.8667	-1.23333	892	95.5333	25.9787
2019-01-04 07:45:00	4.36667	0.94	5.02	1.02	6.93667	122.847	7.09333	9.6	-1.08333	892	94.5	27.4367
2019-01-04 08:00:00	3.92667	0.94	4.52	1.02	6.93	129.453	7.2	22.7067	-1.06333	892	94.1667	30.9633
2019-01-04 08:15:00	4.75333	0.94	5.46333	1.02	7.38	13.42	7.65667	17.0633	-1.12	892	94.1667	34.4853
2019-01-04 08:30:00	4.71333	0.94	5.41667	1.02	7.96667	9.82	8.37667	17.29	-1.13333	892	94.0333	35.7553
2019-01-04 08:45:00	4.05333	0.94	4.66	1.02	7.6	16.9	8.23	23.2367	-1.21333	892	94.7333	33.4693
2019-01-04 09:00:00	3.93333	0.94	4.52	1.02	7.13333	14.1	7.72667	21.8233	-1.09333	893	94.8	32.1807
2019-01-04 09:15:00	4.06667	0.94	4.68667	1.02	7.69	8.77667	7.79667	20.49	-0.81	893	94.0333	32.6653
2019-01-04 09:30:00	4.53333	0.94	5.22667	1.02	8.13	11.2367	8.25667	12.51	-0.543333	893	92.5667	29.9733
2019-01-04 09:45:00	4.33667	0.98	4.99333	1.07	7.71	10.54	7.68667	16.4	-0.25	893.667	91.3667	27.482
2019-01-04 10:00:00	4.46333	37.82	5.14	41.55	7.82333	8.04667	7.63333	14.3867	-0.043333	894	90.1	24.2473
2019-01-04 10:15:00	3.88	13.1033	4.46333	14.3933	7.07667	15.1167	7.2	15.0867	0.306667	894.667	89.4333	18.5907
2019-01-04 10:30:00	3.82667	204.483	4.40333	224.707	6.78333	12.05	6.89333	11.0267	1.04667	895	87.4667	19.0187
2019-01-04 10:45:00	3.89	286.773	4.48	315.133	7.00333	21.9633	6.81667	16.03	1.88667	895	83.6	18.172
2019-01-04 11:00:00	4.07667	309.46	4.68667	340.067	6.79	31.39	6.63667	9.83667	2.16	895.333	81.4667	16.6747
2019-01-04 11:15:00	3.93333	28.6867	4.52333	31.5267	7.05	13.3667	7.27333	19.1667	2.82333	896	79.7667	18.3853
2019-01-04 11:30:00	4.22	48.3733	4.85667	53.16	7.46333	6.52667	7.56667	26.1	3.45	895	75.5533	18.162
2019-01-04 11:45:00	4.21	254.71	4.84333	279.9	7.65	14.4533	7.70333	30.3267	3.95667	895	73.72	17.7113
2019-01-04 12:00:00	4.41	212.55	5.07667	233.567	8.03	16.9867	8.22333	29.7867	4.11	895	72.7667	19.404
2019-01-04 12:15:00	4.68333	224.107	5.39333	246.26	8.40667	13.1333	8.84	27.5933	4.31333	895	71.0267	21.1127
2019-01-04 12:30:00	4.98333	38.2133	5.73333	41.9867	9.14667	12.5	9.39333	24.28	4.52	894	70.4	20.4013
2019-01-04 12:45:00	4.84667	122.093	5.58333	134.173	8.57333	15.6	8.54667	23.7433	4.90333	894	68.41	18.346
2019-01-04 13:00:00	4.46	305.27	5.14333	335.467	7.94	9.82667	7.9	18.89	4.75667	894	68.7967	16.9247
2019-01-04 13:15:00	4.55333	217.16	5.23333	238.63	8.20333	15.3467	8.02667	17.98	4.84667	894	67.5667	13.2067
2019-01-04 13:30:00	4.3	13.88	4.94667	15.2433	7.59	25.86	7.34667	26.0867	4.9	894	66.9333	11.0153
2019-01-04 13:45:00	4.00667	208.887	4.61	229.537	6.58667	16.09	6.21333	27.8033	5.17667	894	65.57	8.99733
2019-01-04 14:00:00	3.32	9.52667	3.83	10.47	5.32667	10.0967	5.12667	23.2167	5.49	894	64.7767	8.81067
2019-01-04 14:15:00	3.80667	37.7367	4.37667	41.46	6.19333	14.2	5.69	20.67	6.16333	894	61.8	9.24267
2019-01-04 14:30:00	3.74	196.217	4.30333	215.613	5.69333	7.52	5.41667	6.25	5.71667	894	60.64	6.996
2019-01-04 14:45:00	4.12	105.217	4.74333	115.613	6.46333	13.6467	6.13333	18.89	5.80667	893.333	61.61	10.4053
2019-01-04 15:00:00	3.9	143.05	4.49	157.187	7.03	18.6667	6.69333	23.91	6.76	893	59.0833	10.6547
2019-01-04 15:15:00	3.97667	198.233	4.57333	217.84	7.31333	16.6767	6.96667	12.7567	6.77333	893	56.5467	10.2653
2019-01-04 15:30:00	3.75	39.4867	4.32	43.3933	6.88	19.2967	6.63333	21.8967	6.54	893	56.2667	7.514
2019-01-04 15:45:00	3.46667	206.623	3.98667	227.063	6.32667	8.71333	6.07667	13.0967	4.90667	893	61.13	6.52933
2019-01-04 16:00:00	3.36667	4.95667	3.87333	5.44333	5.96	15.3267	5.76333	8.86333	5.09333	893	61.65	6.888
2019-01-04 16:15:00	3.31333	133.703	3.80667	146.913	6.13667	24.8	5.93333	22.75	4.67667	893	63.1633	8.118
2019-01-04 16:30:00	3.38667	115.043	3.9	126.413	6.30333	21.04	6.05333	19.53	4.13	892	65.03	7.77867
2019-01-04 16:45:00	3.22667	222.377	3.71333	244.373	6.07667	16.9133	6.16667	25.5233	4.32333	892	64.5033	6.77667
2019-01-04 17:00:00	3.02	41.8367	3.47333	45.9667	5.81	19.64	5.86667	24.8433	4.97	892	62.77	7.39
2019-01-04 17:15:00	3.31667	226.087	3.81333	248.433	6.23	15.3	6.21	31.1933	4.45333	892	64.9033	8.00333
2019-01-04 17:30:00	3.40333	136.647	3.92	150.153	6.19667	19.4333	6.21667	35.8133	3.72667	892	67.33	6.81
2019-01-04 17:45:00	3.14	18.32	3.61333	20.1233	5.87	18.8633	6.11	29.3167	3.24	892	70.3433	7.74067
2019-01-04 18:00:00	2.99333	144.6	3.44667	158.89	5.77	17.4833	5.95667	25.43	2.95333	892	71.13	10.906
2019-01-04 18:15:00	3.45667	255.837	3.97333	281.133	6.55333	12.92	6.75	36.7667	2.54333	892	72.0133	11.8627
2019-01-04 18:30:00	3.35667	172.663	3.86	189.733	6.56667	12.7733	6.91	28.8067	2.27	892	73.1133	12.7107
2019-01-04 18:45:00	3.31333	181.483	3.80667	199.423	6.46	12.26	6.78333	31.7067	2.06	892	73.8533	15.092
2019-01-04 19:00:00	3.53333	219.703	4.06	241.423	6.92	10.0533	7.37667	30.2333	1.80667	892	75.0333	14.6867
2019-01-04 19:15:00	3.40667	231.48	3.92	254.367	6.55	27.6967	7.24	31.62	1.74667	892	74.5433	14.6053
2019-01-04 19:30:00	3.28667	182.573	3.78	200.633	6.41	15.7433	7.19333	29.6267	1.71333	892	74.03	14.15
2019-01-04 19:45:00	3.52	166.63	4.04667	183.1	6.68	16.1633	6.95	23.8733	1.65	892	73.7	14.272
2019-01-04 20:00:00	3.46	176.157	3.98	193.567	6.6	12.6567	6.85667	23.92	1.57	892	74.1667	13.9987
2019-01-04 20:15:00	3.39333	231.927	3.9	254.867	6.35667	10.4433	6.44333	36.6233	1.11667	892	77.2267	13.3053
2019-01-04 20:30:00	2.96667	124.427	3.42	136.733	5.59667	26.6633	5.79	21.0367	0.896667	892	78.56	11.8947
2019-01-04 20:45:00	2.87733	24.8013	3.32333	27.246	5.15867	14.5373	5.22533	17.9907	0.719333	892	80.066	10.312
2019-01-04 21:00:00	2.57333	226.54	2.96667	248.94	4.87333	13.43	5.16333	34.0367	0.503333	892	81.1667	8.71533
2019-01-04 21:15:00	2.68667	298.663	3.1	328.2	4.74	14.0933	4.89667	35.27	0.376667	892	81.8	9.28267
2019-01-04 21:30:00	2.77333	316.617	3.19333	347.933	4.53333	47.2933	4.51667	20.8833	0.356667	892	82	7.43133
2019-01-04 21:45:00	2.45267	306.578	2.81933	336.893	4.32467	123.335	3.97867	9.29933	0.226	892	81.9867	5.898
2019-01-04 22:00:00	2.3	287.687	2.64333	316.133	3.96667	121.907	3.73	2.62667	0.256667	892	81.5667	6.376
2019-01-04 22:15:00	2.40667	267.753	2.77333	294.233	4.45333	1.23667	4.37667	4.96	0.04	892	82.7667	5.508
2019-01-04 22:30:00	2.18667	316.347	2.52	347.633	4.06	239.003	4.01667	2.10667	-0.266667	892	84.4333	4.72
2019-01-04 22:45:00	2.34333	117.077	2.70333	128.647	4.02	15.0833	4.20333	12.05	-0.306667	892	85.2	3.56067
2019-01-04 23:00:00	2.29	109.543	2.63	120.373	4.00667	3.21	3.91667	4.21667	-0.433333	892	86.2	3.51667
2019-01-04 23:15:00	2.61467	303.033	3.00933	332.994	4.21267	3.794	4.102	9.26533	-0.578	892	87.1467	4.62533
2019-01-04 23:30:00	2.94667	315.043	3.39	346.2	5.01	1.18667	4.76	11.5767	-0.613333	892	87.4667	7.60867
2019-01-04 23:45:00	3.10667	207.48	3.58	227.993	5.45667	118.133	5.35667	15.39	-0.716667	891.333	88.2	8.70333
2019-01-05	3.37533	24.6147	3.88933	27.0473	5.84667	353.26	5.95333	10.1747	-0.778	891	88.68	9.95
2019-01-05 00:15:00	3.71667	104.66	4.27667	115.013	6.11333	122.727	6.06667	7.08667	-0.666667	891	88.6	11.9353
2019-01-05 00:30:00	3.94333	104.607	4.53667	114.947	6.46667	356.9	6.34667	11.4533	-0.686667	891	88.9333	13.7633
2019-01-05 00:45:00	4.14	103.01	4.76333	113.187	6.42667	2.66333	6.38667	8.37667	-0.49	891	88.2333	14.0507
2019-01-05 01:00:00	4.32667	99.4367	4.99	109.267	6.16	3.41	6.14667	10.5367	-0.436667	891	87.6667	15.4107
2019-01-05 01:15:00	4.76667	92.6467	5.49	101.807	7.34	14.55	7.30333	3.85333	-0.533333	891	88.5333	22.5793
2019-01-05 01:30:00	5.06667	90.88	5.83	99.86	6.78667	242.837	6.79	10.4667	-0.506667	891.333	88.2	23.6267
2019-01-05 01:45:00	4.94	263.08	5.68667	289.1	7.14667	6.92333	7.32667	16.56	-0.55	892	88.6667	24.2293
2019-01-05 02:00:00	5.00667	55.06	5.76	60.5067	7.10667	16.15	7.42	15.9733	-0.583333	892	89	24.1407
2019-01-05 02:15:00	4.48667	320.533	5.16333	352.233	6.55667	59.4	6.87	17.67	-0.713333	892	89.9	26.3447
2019-01-05 02:30:00	4.58	128.347	5.27667	141.04	6.81667	69.1467	7.16333	243.437	-0.793333	892	90.4333	27.9047
2019-01-05 02:45:00	4.77333	111.48	5.49333	122.493	7.13333	245.52	7.17	120.833	-0.866667	892	90.9	27.824
2019-01-05 03:00:00	4.46	121.327	5.12667	133.313	6.86	10.1933	7.04333	130.06	-0.886667	892	90.9	28.3913
2019-01-05 03:15:00	4.76	129.14	5.48	141.907	8.01667	236.45	7.70333	7.78333	-0.89	892	90.5333	29.846
2019-01-05 03:30:00	4.8	122.793	5.53333	134.933	8.27	9.99	8.24333	6.61667	-0.903333	892	90.2	30.32
2019-01-05 03:45:00	4.85333	22.79	5.59333	25.0367	8.14667	225.717	7.92333	354.033	-1.01	892	90.7	30.2047
2019-01-05 04:00:00	4.98667	228.677	5.74	251.283	7.86	219.183	7.76333	127.787	-1.11667	891	90.9	30.06
2019-01-05 04:15:00	4.86667	108.39	5.60667	119.1	7.82	353.1	7.63	239.647	-1.21333	891	90.8333	30.7893
2019-01-05 04:30:00	5.4	107.143	6.20667	117.74	9.37333	351.433	9.07667	22.2533	-1.22	891	90.3333	31.868
2019-01-05 04:45:00	5.48	27.2233	6.31	29.9067	8.28	228.737	8.20333	235.603	-1.23333	891	90.2333	31.0173
2019-01-05 05:00:00	5.46	11.5167	6.27667	12.6467	7.76	232.937	7.52333	8.32333	-1.26	891	90.1	30.0327
2019-01-05 05:15:00	4.79	220.36	5.50667	242.14	7.57333	353.633	7.23333	7.13	-1.38333	891	90.7	28.6487
2019-01-05 05:30:00	4.77	18.4667	5.49333	20.28	7.24667	153.587	6.95333	5.08333	-1.39667	891	90.3	26.9933
2019-01-05 05:45:00	4.28667	187.367	4.93	205.887	6.68	121.74	6.17667	13.52	-1.41333	891	89.9333	24.792
2019-01-05 06:00:00	4.06	215.027	4.67667	236.287	6.38	150.727	5.85	14.0067	-1.58	890.667	90.8	24.006
2019-01-05 06:15:00	4.22667	0.593333	4.86333	0.65	6.79667	8.87333	6.96	20.25	-1.75	890	91.3667	23.8113
2019-01-05 06:30:00	4.08	15.8	4.70333	17.3567	6.81667	5.79333	7.13333	17.7367	-1.91	890.333	92.1	23.964
2019-01-05 06:45:00	4.11333	10.4467	4.73333	11.48	6.01	2.38333	6.14	10.4933	-1.94	891	92.0333	23.5733
2019-01-05 07:00:00	4.14	26.7333	4.76667	29.3733	6.09	5.43667	6.32667	13.06	-1.96667	891	92.0333	18.2713
2019-01-05 07:15:00	3.42333	294.273	3.93333	323.367	6.16	0.166667	6.47667	14.8433	-2.2	891	93.2	17.2953
2019-01-05 07:30:00	3.23667	287.167	3.72	315.567	5.68	223.733	5.60333	11.15	-2.3	891	93.8	15.0033
2019-01-05 07:45:00	3.63333	112.78	4.18	123.927	5.21333	243.563	5.2	25.3433	-2.17667	891	93.3667	14.338
2019-01-05 08:00:00	3.66667	131.14	4.22	144.113	5.78	7.21667	5.83333	12.4433	-2.18333	891	93.0667	9.52133
2019-01-05 08:15:00	3.14	324.05	3.61667	356.1	5.56667	2.11	5.57333	5.53	-2.33667	891	93.8667	7.952
2019-01-05 08:30:00	3.25	317.82	3.745	349.25	5.655	0.9	5.83	5.845	-2.325	891	93.95	10.743
2019-01-05 08:45:00	2.98667	16.47	3.43333	18.09	5.22	5.29	5.58	11.86	-2.29333	891	94.3	5.052
2019-01-05 09:00:00	2.36667	3.03	2.72	3.32333	4.39333	6.61667	4.52	9.38	-2.1	891	94.4	5.228
2019-01-05 09:15:00	2.52	202.77	2.9	222.817	4.41333	7.3	4.51667	6.84667	-1.55333	891.667	93.6333	8.79
2019-01-05 09:30:00	3.4	184.383	3.90667	202.617	5.57333	7.59333	5.74333	13.12	-1.35333	892.333	92.9	10.4733
2019-01-05 09:45:00	3.45333	301.267	3.97667	331.067	5.51667	13.9367	5.52667	14.37	-0.94	893	91.4	9.27133
2019-01-05 10:00:00	3.36667	321.593	3.88333	353.4	4.88333	14.7767	4.93333	22.61	-0.72	893.333	90.4667	6.56
2019-01-05 10:15:00	3.30667	127.39	3.80333	139.99	5.10333	9.18667	4.95	17.1467	-0.41	894	89.5333	3.40333
2019-01-05 10:30:00	3.24667	19.9767	3.74333	21.95	4.79	11.1333	4.77667	16.7467	0.096667	894	87.1	1.92
2019-01-05 10:45:00	3.01333	214.543	3.48	235.75	3.94333	9.15	3.91667	14.84	0.366667	894	84.9	1.48733
2019-01-05 11:00:00	2.96	215.51	3.40667	236.817	3.77	11.4633	3.71	4.96	0.173333	894	85.1667	0.464667
2019-01-05 11:15:00	2.84667	123.877	3.27667	136.127	3.4	17.7233	3.52667	17.4667	0.393333	894	84.3333	0.87
2019-01-05 11:30:00	2.91333	109.25	3.35	120.053	3.82667	8.75667	3.88	14.08	0.846667	894	82.8	0.656667
2019-01-05 11:45:00	2.96667	23.7133	3.41333	26.06	3.75333	14.53	3.63333	22.0167	1.36333	894	78.53	0
2019-01-05 12:00:00	1.78	2.02667	2.04667	2.22	2.08667	240.143	1.7	6.27	1.56333	894	76.5233	0
2019-01-05 12:15:00	1.16667	216.423	1.34	237.817	1.08333	259.647	0.193333	268.267	1.70667	894	74.9033	0
2019-01-05 12:30:00	1.26	96.2433	1.45333	105.75	1.33	125.98	1.36667	152.267	1.97333	894	74.0767	0
2019-01-05 12:45:00	2.57667	134.413	2.96333	147.7	2.87667	192.7	2.87333	204.167	2.04333	893.333	75.5333	0
2019-01-05 13:00:00	2.076	121.358	2.388	133.36	2.5	173.28	2.38	211.5	2.092	893	74.526	0
2019-01-05 13:15:00	1.86	153.767	2.15	168.967	2.06	158.933	2.26667	168.5	2.02	893	72.01	0
2019-01-05 13:30:00	2.24	146.607	2.58333	161.1	2.50667	171.4	2.48667	183.767	2.08	893	73.23	0
2019-01-05 13:45:00	2.3	158.583	2.64667	174.267	2.55333	190.133	2.45	183.3	2.15333	892.333	72.2067	0
2019-01-05 14:00:00	1.89067	155.811	2.174	171.22	2.09067	194.22	1.986	186.573	2.208	892	71.92	0
2019-01-05 14:15:00	2.06	133.74	2.38	146.967	2.34	205.5	2.38667	196.767	2.41	892	70.4333	0
2019-01-05 14:30:00	1.68667	164.447	1.94	180.7	2.14667	199.833	2.33333	193.567	2.63	892	70.5067	0
2019-01-05 14:45:00	1.62	170.183	1.87	187	2.28333	202.667	2.37667	204.333	2.66667	892	70.6867	0
2019-01-05 15:00:00	2.14	176.063	2.46333	193.467	2.81	218.4	2.73	214.533	2.7	892	71.0533	0
2019-01-05 15:15:00	1.51	153.517	1.74667	168.7	1.92	196.3	1.84	197.2	2.75	892	71.28	0
2019-01-05 15:30:00	1.35667	143.63	1.56	157.833	1.78	193.433	2.23333	188.333	2.76333	892	71.08	0
2019-01-05 15:45:00	1.82333	176.573	2.1	194.033	2.21	210.2	2.26	188.4	2.73	892	71.97	0
2019-01-05 16:00:00	1.91667	149.22	2.20667	163.967	2.21667	183.733	2.54	191.8	2.65	891	72.4833	0
2019-01-05 16:15:00	2.31333	166.62	2.66667	183.1	2.80667	188.233	3.42	177.6	2.63667	891	72.48	0
2019-01-05 16:30:00	1.96667	136.893	2.26	150.433	2.43333	177.367	2.86	175.267	2.75	891	72.4867	0
2019-01-05 16:45:00	1.93333	164.173	2.23667	180.4	2.37	178.267	2.58333	177.7	2.88667	891	72.1967	0
2019-01-05 17:00:00	1.66	164.78	1.91	181.067	2.10333	193.067	2.49	191.5	2.94	891	72.3633	0
2019-01-05 17:15:00	1.92667	170.937	2.22	187.833	2.59333	199.933	2.78333	198.167	2.93	891	72.5833	0
2019-01-05 17:30:00	2.32667	162.87	2.68667	178.967	2.99333	200.4	3.01	198.833	2.94333	891	72.89	0.328667
2019-01-05 17:45:00	2.56333	180.957	2.946	198.853	3.38667	202.533	3.298	199.5	2.84867	891	73.6107	0.523333
2019-01-05 18:00:00	2.44	154.857	2.80333	170.167	3.12333	198.867	3.31333	180	2.79667	891	73.7033	0.440667
2019-01-05 18:15:00	2.10667	162.507	2.42333	178.567	2.71667	185.533	3.14667	184.2	2.78333	891	73.3333	0.608667
2019-01-05 18:30:00	2.08	174.207	2.39667	191.433	2.73667	179.2	3.12	167.067	2.75	891	73.5267	0.212
2019-01-05 18:45:00	2.01667	149.147	2.32	163.9	2.6	163.567	3.08333	162.133	2.74333	891	73.7467	0.005333
2019-01-05 19:00:00	1.41	126.373	1.62667	138.867	2.12	154.633	2.89667	158.133	2.75	891	73.42	0
2019-01-05 19:15:00	1.47333	172.67	1.70667	189.733	2.14667	179.333	2.83667	175.233	2.82	891	73.22	0.440667
2019-01-05 19:30:00	1.9	168.843	2.18667	185.533	2.54667	177.333	3.24333	175.967	2.89333	891	73.08	0.544667
2019-01-05 19:45:00	1.66	145.547	1.91	159.933	2.21667	206.933	2.52	187	2.98667	891	72.75	0
2019-01-05 20:00:00	0.793333	170.72	0.91	187.6	1.25	183.533	1.88	179.4	3.00333	891	72.72	0
2019-01-05 20:15:00	0.7	158.17	0.82	173.8	1.4	183.6	2.1	172.7	2.99	891	72.6067	0.022667
2019-01-05 20:30:00	1.55333	182.337	1.79333	200.367	2.13	186.367	2.76667	182.9	2.99667	891	72.7133	0
2019-01-05 20:45:00	1.73333	178.45	2	196.1	2.42333	182.033	3.01	186.4	2.97	891	73.13	0.164667
2019-01-05 21:00:00	2.01333	181.737	2.32	199.7	2.67667	201.7	2.91	206.667	2.95	891.333	73.5067	1.038
2019-01-05 21:15:00	2.49	174.873	2.86333	192.167	3.12333	200.8	3.63	200.133	2.83333	892	74.17	1.38467
2019-01-05 21:30:00	2.53	155.833	2.91	171.233	3.08333	189.867	3.57667	205.667	2.68667	892	75.0367	1.96133
2019-01-05 21:45:00	2.01333	183.46	2.32667	201.6	2.72	213.5	2.9	219.3	2.73	892	74.8167	2.57667
2019-01-05 22:00:00	1.93333	173.753	2.23333	190.933	2.57333	216.433	2.51333	220.3	2.73	892	75.45	1.92733
2019-01-05 22:15:00	1.95	154.187	2.24	169.433	2.49667	208.7	2.60333	201.067	2.62333	892	76.2433	1.01733
2019-01-05 22:30:00	2.09667	162.32	2.41333	178.367	2.61	181.167	2.88333	207.2	2.46333	892	76.5833	0.658
2019-01-05 22:45:00	1.84	157.793	2.11667	173.4	2.33	201.367	2.42667	203.633	2.46	892	76.7067	0.434
2019-01-05 23:00:00	1.99333	158.4	2.30333	174.067	2.55667	192.9	2.48667	193.633	2.46667	892	77.3	0.128667
2019-01-05 23:15:00	1.78	157.99	2.05	173.6	2.32	184.4	2.33	187.2	2.5	892	77.44	0
2019-01-05 23:30:00	1.79333	170.633	2.06	187.5	2.47667	185.033	2.32667	186.4	2.48333	892	78.05	0
2019-01-05 23:45:00	1.6	164.107	1.84	180.333	2.19667	186.267	2.06333	188.367	2.50333	891.333	78.6933	0
2019-01-06	1.37333	161.933	1.58667	177.933	1.85667	186.7	1.87667	187.767	2.51	891	79.0467	0
2019-01-06 00:15:00	1.17333	171.533	1.35667	188.5	1.71333	190.3	2.16333	211.933	2.49333	891	79.7533	0.274
2019-01-06 00:30:00	1.26667	169.847	1.45667	186.633	2.14667	213.167	2.68333	223.267	2.45333	891	80.0933	0.952667
2019-01-06 00:45:00	2.19	170.057	2.51667	186.867	3.44667	220.9	3.52667	217.6	2.37333	891	80.6	1.40667
2019-01-06 01:00:00	1.68333	180.61	1.93667	198.467	2.56	218.233	2.96	220.667	2.46667	891	80.5667	1.08333
2019-01-06 01:15:00	1.6	174.943	1.85333	192.233	2.71667	220.3	2.89	222.2	2.45333	891	81.1	1.316
2019-01-06 01:30:00	1.34	160.737	1.54667	176.633	2.31	220.233	2.57667	226.867	2.36	891	81.7333	0.732
2019-01-06 01:45:00	0.886667	171.08	1.02333	188	1.56667	206.8	2.10667	210.9	2.26333	891	82.2	0.46
2019-01-06 02:00:00	1.02667	157.853	1.17667	173.467	1.78	183.733	1.76	204.833	2.08333	891	82.2333	0
2019-01-06 02:15:00	0.726667	158.433	0.836667	174.1	1.18	186.267	1.49333	214.333	2.12	891	81.6	0
2019-01-06 02:30:00	0.113333	175.18	0.13	192.5	0.22	207.333	0.613333	233.8	2.16667	890.667	81.6333	0
2019-01-06 02:45:00	0.006667	154.797	0.006667	170.1	0.01	214.2	0.066667	233.8	2.18	890	81.9	0
2019-01-06 03:00:00	0.36	114.03	0.413333	125.3	0.716667	210.3	1.21333	207.967	2.28667	890	81.7	0
2019-01-06 03:15:00	0.5	141.96	0.58	156	0.993333	215.2	1.59333	208.133	2.30667	890	81.7	0.030667
2019-01-06 03:30:00	0.726667	147.42	0.833333	162	1.42	233.633	1.75333	247.8	2.33333	890	82.1	0
2019-01-06 03:45:00	0.793333	174.603	0.92	191.867	1.45333	216.9	1.38667	206.533	2.42667	890	82.4	0
2019-01-06 04:00:00	0.573333	197.603	0.66	217.133	1.09333	219.967	1.03333	206.467	2.48	889.333	82	0
2019-01-06 04:15:00	0.64	210.95	0.74	231.8	1.26667	241.967	1.35667	248.433	2.43	890	82.3	0
2019-01-06 04:30:00	0.226667	210.95	0.266667	231.8	0.433333	226.9	0.943333	242.5	2.39	889.667	82.4333	0
2019-01-06 04:45:00	0.517333	85.5693	0.6	94.0287	0.432	166.12	0.053333	267.34	1.87	889	84.8333	0
2019-01-06 05:00:00	1.46667	310.523	1.68667	341.233	1.86667	8.85333	0.853333	347.033	1.55	889	87.3667	0
2019-01-06 05:15:00	1.88	216.597	2.16333	238.017	2.45667	13.7367	1.56333	239.877	1.36667	889	88.9667	0
2019-01-06 05:30:00	2.22	216.537	2.55667	237.95	2.98333	18.3433	2.51	11.6433	1.32	888.667	89.4333	0
2019-01-06 05:45:00	2.03667	313.31	2.34667	344.3	2.97333	17.8567	3.04333	25.8367	1.38667	888	88.7667	0
2019-01-06 06:00:00	1.98333	307.88	2.29333	338.333	2.5	14.97	2.86333	23.5833	1.40667	888	88.5333	0
2019-01-06 06:15:00	2.31333	316.477	2.65667	347.767	2.59	122.907	2.83667	127.573	1.34333	888	89.1	0
2019-01-06 06:30:00	2.18667	305.923	2.51667	336.167	2.30333	120.633	2.15667	125.967	1.35	888	89.1667	0
2019-01-06 06:45:00	2.02667	214.237	2.33333	235.417	2.57	17.2867	2.27333	21.5533	1.36333	888	89.7667	0
2019-01-06 07:00:00	2.01333	204.763	2.32667	225.017	2.54333	9.34	2.32667	26.32	1.25	888	91.1	0
2019-01-06 07:15:00	2.34	11.66	2.69	12.8133	2.99	11.5367	2.4	16.81	1.03333	888	92.7333	0
2019-01-06 07:30:00	2.84	10.6733	3.26333	11.7267	3.49667	7.29	3	20.2967	0.793333	888.333	93.8	0
2019-01-06 07:45:00	2.958	1.91267	3.40667	2.09667	3.41133	4.282	3.18467	14.296	0.632667	889	94.6667	0
2019-01-06 08:00:00	2.77333	6.79667	3.19333	7.46333	3.19667	2.43667	3.02	14.4033	0.663333	889	94.8333	0
2019-01-06 08:15:00	2.77667	213.717	3.19333	234.853	3.2	9.80333	2.94	10.51	0.703333	889	94.8333	0
2019-01-06 08:30:00	2.78333	1.57667	3.2	1.72667	3.04	4.91	2.85333	6.05	0.656667	889	95.5	0
2019-01-06 08:45:00	2.57333	297.143	2.96	326.533	3.35667	12.4633	3.4	119.687	0.606667	889	96	0
2019-01-06 09:00:00	2.54667	314.07	2.93333	345.133	3.00333	12.5633	3.12667	124.227	0.6	889	96.2333	0
2019-01-06 09:15:00	2.82	102.073	3.24667	112.167	3.25333	2.75667	3.08333	7.12333	0.563333	889	96.7	0
2019-01-06 09:30:00	2.79333	310.5	3.22	341.2	3.36	2.69667	3.12333	33.3633	0.59	889.333	97.0333	0
2019-01-06 09:45:00	2.67333	301.693	3.07333	331.533	3.49333	2.22667	3.23333	9.42333	0.616667	890	97.2	0.15
2019-01-06 10:00:00	2.75333	318.44	3.17333	349.933	3.62667	7.22	3.48667	8.90333	0.596667	890	97.6	0.487333
2019-01-06 10:15:00	2.88	281.007	3.30667	308.8	3.97667	6.49333	3.73667	6.91	0.646667	890	97.7	0.493333
2019-01-06 10:30:00	3.07667	95.5067	3.54	104.947	3.89667	5.31333	3.62333	0.256667	0.7	890	97.4667	0.459333
2019-01-06 10:45:00	3.24	106.41	3.72667	116.927	3.91	0.68	3.68667	3.65	0.746667	890	97	0.884667
2019-01-06 11:00:00	2.92	307.55	3.36667	337.967	3.82333	2.98667	3.7	1.15	0.806667	890.333	96.7	0.92
2019-01-06 11:15:00	3.15333	232.277	3.63667	255.247	4.15333	3.26667	4.05667	14.1967	0.856667	891	96.4667	1.64467
2019-01-06 11:30:00	3.16667	18.27	3.64333	20.0667	4.25333	6.22	4.06333	14.2633	0.816667	890	96.8	2.11867
2019-01-06 11:45:00	3.25667	3.98467	3.744	4.368	4.57	1.22067	4.356	11.7193	0.832667	890	97.1	2.24067
2019-01-06 12:00:00	3.27333	15.05	3.76667	16.5267	4.31667	3.03667	4.13333	11.08	0.826667	890	97.1333	2.49667
2019-01-06 12:15:00	3.25667	306.307	3.74667	336.6	4.45667	122.44	4.06333	14.5467	0.83	890	97.1333	3.21
2019-01-06 12:30:00	3.60333	128.74	4.14667	141.467	4.69	126.38	4.59	14.16	0.876667	890	97.1667	4.214
2019-01-06 12:45:00	3.45333	112.683	3.97333	123.82	4.71333	6.64	4.68667	11.97	1.01333	890	96.6	4.92867
2019-01-06 13:00:00	3.13333	121.583	3.61333	133.6	4.60667	184.48	4.67333	14.9833	1.13333	890	96.2667	4.88733
2019-01-06 13:15:00	3.06333	11.8967	3.52667	13.07	4.33	121.347	4.31333	4.38	1.15	890	96.1333	4.53533
2019-01-06 13:30:00	3.08333	13.3567	3.54667	14.6767	4.01	355.467	4.1	7.72	1.15	889	95.8667	4.87067
2019-01-06 13:45:00	2.99	7.19333	3.43667	7.90333	4.31667	184	4.33667	6.93333	1.28	889	95.5	4.98
2019-01-06 14:00:00	2.82333	36.4	3.25	39.9967	4.31667	341.933	4.24333	10.5333	1.36667	889	95.2667	4.77933
2019-01-06 14:15:00	2.82667	125.003	3.25333	137.36	4.52333	4.52333	4.28333	4.34	1.55	889	94.8667	4.686
2019-01-06 14:30:00	2.97733	316.043	3.42267	347.293	4.514	5.87133	4.21933	2.204	1.58867	889	94.6	6.084
2019-01-06 14:45:00	2.82	192.977	3.24667	212.067	4.58	12.87	4.35	0.2	1.76333	889	94.5	6.13933
2019-01-06 15:00:00	2.80667	88.3833	3.22667	97.12	4.3	13.3233	4.16333	3.56667	1.81	889	94.1	6.268
2019-01-06 15:15:00	2.94667	123.963	3.4	136.22	4.41333	6.6	4.42	15.91	1.78333	889	94.4333	6.968
2019-01-06 15:30:00	2.88	113.583	3.32	124.82	4.61333	10.88	4.59333	20.4167	1.83333	889	94.2667	6.78067
2019-01-06 15:45:00	3.31733	6.05933	3.81267	6.656	4.97	255.657	4.92333	5.78667	1.768	889	94.08	9.76933
2019-01-06 16:00:00	3.27333	221.45	3.76333	243.35	5.12	19.5433	4.95	9.21333	1.74667	889	94.3333	10.9907
2019-01-06 16:15:00	3.52667	227.343	4.06333	249.823	5.87	35.3733	5.67333	17.3167	1.75667	889	94.4667	14.794
2019-01-06 16:30:00	3.93333	224.743	4.53667	246.957	6.38333	18.2333	6.06667	15.8633	1.66333	889	94.6667	16.7087
2019-01-06 16:45:00	3.38667	17.71	3.9	19.46	6.01667	13.6533	5.78	17.3433	1.63	889	95.2667	12.4213
2019-01-06 17:00:00	2.70667	216.85	3.12	238.287	4.73	17.9067	4.46667	15.4967	1.59	889	95.4	9.002
2019-01-06 17:15:00	2.85333	89.3567	3.28667	98.1933	5.04	351.6	4.93333	10.5	1.53667	889	95.4667	10.102
2019-01-06 17:30:00	3.24	88.9167	3.73333	97.7067	5.55667	355.6	5.28667	4.22667	1.51667	889	95.4	12.0533
2019-01-06 17:45:00	3.12	26.1567	3.59	28.7433	5.32667	7.42667	5.28	14.3533	1.46333	889	95.6667	12.9093
2019-01-06 18:00:00	3.05333	12.3167	3.51667	13.53	5.1	5.26667	5.06667	12.2467	1.41	889	95.8	10.9647
2019-01-06 18:15:00	2.91333	216.827	3.34667	238.267	4.9	7.91667	4.78667	6.68	1.37	889	95.6	11.3587
2019-01-06 18:30:00	2.74667	216.767	3.16	238.2	5.12667	239.957	4.87333	7.89333	1.31	889	95.8333	12.2767
2019-01-06 18:45:00	2.88667	26.0267	3.32333	28.6	5.09	236.117	4.72333	5.69	1.27333	889	95.9667	11.8633
2019-01-06 19:00:00	2.79333	23.4	3.21667	25.7133	4.66333	239.717	4.53667	7.29667	1.26333	889	96.0667	10.0393
2019-01-06 19:15:00	2.31333	218.86	2.66	240.507	4.03333	31.85	4.15667	24.69	1.21333	889	96.4	9.50133
2019-01-06 19:30:00	2.132	154.745	2.45067	170.051	3.80933	23.1567	4.036	21.2253	1.19067	889.333	96.3667	9.57533
2019-01-06 19:45:00	2.43667	304.493	2.80667	334.6	4.43667	10.01	4.76	12.4867	1.17333	890	96.1	10.056
2019-01-06 20:00:00	2.55	142.633	2.93333	156.733	4.94333	11.79	5.05333	19.92	1.11333	890	96.2333	10.5093
2019-01-06 20:15:00	2.53333	302.583	2.91667	332.5	4.95667	11.5667	5.19	18.2	1.11333	890	95.8333	9.17467
2019-01-06 20:30:00	2.46667	124.523	2.83667	136.833	4.70333	11.7267	4.78333	11.6933	1.1	890	95.5	8.40333
2019-01-06 20:45:00	2.37	118.12	2.72333	129.793	4.40333	6.31667	4.62	17.7733	1.16	890	94.5	6.982
2019-01-06 21:00:00	2.05	127.293	2.35667	139.88	3.87667	3.15	4.16667	18.9733	1.15667	890	94.2	6.52933
2019-01-06 21:15:00	2.33333	24.4433	2.68667	26.8567	3.8	1.58333	4.04333	6.30667	1.21333	890	93.6333	9.01067
2019-01-06 21:30:00	2.26667	212.417	2.60667	233.417	4.1	12.19	4.50333	18.26	1.19333	890	93.7	8.524
2019-01-06 21:45:00	2.19	307.277	2.52	337.667	4.17333	8.74	4.56667	16.69	1.07333	890	94.7	7.61667
2019-01-06 22:00:00	2.19667	293.323	2.52667	322.333	4.08667	7.00667	4.5	18.3433	1.04667	890.333	95	7.12067
2019-01-06 22:15:00	2.33333	308.063	2.68333	338.533	4.29667	11.5333	4.95	19.9967	1.05333	891	94.7	6.28867
2019-01-06 22:30:00	2.26	309.71	2.61	340.333	4.31667	12.4067	4.62333	18.9433	1.06667	891	94.4667	5.92067
2019-01-06 22:45:00	2.31333	227.997	2.67333	250.55	4.54	11.2567	4.66333	13.0467	1.06	891	94.3333	5.30133
2019-01-06 23:00:00	2.38	223.143	2.74	245.217	4.34	7.72333	4.59667	11.5867	1.05333	891	94.4333	6.17
2019-01-06 23:15:00	2.63333	211.477	3.02667	232.393	4.98667	18.2133	5.33667	16.4433	1.12	890.333	94.0333	5.01
2019-01-06 23:30:00	2.42	198.563	2.79333	218.193	4.64667	29.52	5.15667	17.3167	1.11333	890	93.9333	3.33733
2019-01-06 23:45:00	1.90667	176.483	2.19	193.933	3.72333	11.4267	4.19333	12.93	1.09	890	93.9667	2.89867
2019-01-07	2.02	192.323	2.32333	211.333	3.64333	240.893	3.98	8.58333	1.10667	890	93.5333	2.74133
2019-01-07 00:15:00	2.29333	269.387	2.64333	296.033	4.25333	5.62667	4.10667	11.5967	1.19667	890	92.3333	2.62067
2019-01-07 00:30:00	2.17333	256.04	2.51	281.367	4.22667	238.593	4.16667	9.45667	1.23	890	91.5333	4.26133
2019-01-07 00:45:00	2.34667	272.123	2.71	299.033	4.22	8.4	4.27333	24.34	1.23333	890	91.7	4.212
2019-01-07 01:00:00	2.55333	98.65	2.94333	108.4	4.41333	10.38	4.37333	17.32	1.23333	890	92.1333	4.35133
2019-01-07 01:15:00	2.38333	226.39	2.75	248.777	3.96667	27.8633	4.26667	4.86667	1.17333	890	92.9	7.01133
2019-01-07 01:30:00	2.78333	194.117	3.20333	213.31	4.85333	10.1167	5.08	8.79333	1.09333	890	94.3	7.156
2019-01-07 01:45:00	2.74	10.97	3.15333	12.05	4.75333	14.45	4.57667	17.08	0.99	890	95.6667	6.19067
2019-01-07 02:00:00	2.65333	216.537	3.05333	237.95	4.49333	15.9567	4.72333	15.2267	0.983333	890	95.8	7.47667
2019-01-07 02:15:00	2.45333	308.707	2.82333	339.233	4.55	12.0967	4.87	9.71667	0.926667	890.667	96.1333	10.3433
2019-01-07 02:30:00	2.33333	305.44	2.68333	335.633	4.21	12.47	4.79	11.7767	0.866667	891	96.8667	12.6333
2019-01-07 02:45:00	2.19333	26.0767	2.52667	28.6567	3.76667	11.1433	4.19	14.29	0.806667	891	97.7	14.8433
2019-01-07 03:00:00	2.12	211.137	2.44	232.01	4.03333	18.8967	4.03	20.89	0.773333	890	98.0333	14.232
2019-01-07 03:15:00	2.43	13.2	2.79333	14.5	4.33667	20.0967	4.78	30.98	0.736667	890	98.3667	16.8087
2019-01-07 03:30:00	2.58333	61.28	2.97333	67.34	4.59	17.4167	4.90667	15.26	0.716667	891	98.6333	17.7667
2019-01-07 03:45:00	2.70333	317.68	3.11	349.1	4.87	21.7967	5.26667	20.21	0.68	891	99	22.3073
2019-01-07 04:00:00	3.27	320.6	3.76333	352.3	5.79	25.6567	6.14667	33.1833	0.646667	890.667	99.3333	23.4933
2019-01-07 04:15:00	3.16667	1.30667	3.64333	1.43667	6.10667	24.7933	6.63667	30.5533	0.62	890	99.4667	22.3273
2019-01-07 04:30:00	3.13333	41.3267	3.61667	45.4033	5.96667	18.2133	6.27667	25.2333	0.593333	890	99.5	22.4253
2019-01-07 04:45:00	3.04	305.193	3.51	335.367	5.33	19.5967	5.99	25.5233	0.62	890.667	99.0667	20.9093
2019-01-07 05:00:00	3	308.893	3.46333	339.433	5.51667	17.2967	6.53	19.4767	0.686667	890	97.9333	22.91
2019-01-07 05:15:00	2.68	114.837	3.09333	126.193	4.96333	13.3033	5.78	14.46	0.623333	890	97.9333	21.468
2019-01-07 05:30:00	2.58	113.47	2.96667	124.68	4.61667	18.5233	4.90667	19.8933	0.576667	890	98.3333	23.9527
2019-01-07 05:45:00	3.02	115.407	3.48	126.82	5.65	16.41	6.31333	25.69	0.55	890	98.4667	24.1507
2019-01-07 06:00:00	3.17333	321.903	3.65333	353.733	5.91667	24.7833	6.56667	25.0367	0.596667	890	97.6667	23.2707
2019-01-07 06:15:00	3.10333	33.0433	3.57333	36.3133	5.74667	32.27	5.31333	40.22	0.7	890	96.2333	21.8407
2019-01-07 06:30:00	2.94333	45.83	3.39333	50.36	5.73333	26.7233	6.32667	32.1733	0.733333	890.333	95.7	24.0607
2019-01-07 06:45:00	3.062	72.678	3.52	79.856	5.95133	26.002	6.752	30.186	0.692	891	95.98	24.3067
2019-01-07 07:00:00	3.19667	164.29	3.67333	180.533	6.02	20.0767	6.46	26.6367	0.666667	891	96.3	21.1313
2019-01-07 07:15:00	3.15333	283.933	3.63333	312	5.65	244.973	6.26	24.4167	0.706667	891	95.8	24.1253
2019-01-07 07:30:00	3.39333	314.38	3.90667	345.467	5.92333	24.0667	6.47667	27.9967	0.766667	891	94.7333	24.5387
2019-01-07 07:45:00	3.34	245.427	3.84333	269.7	6.26333	23.5933	6.98	27.0767	0.743333	891	94.4667	22.062
2019-01-07 08:00:00	3.34	247.493	3.84333	271.967	6.42333	23.9933	7.16667	26.9167	0.623333	891	94.6	20.722
2019-01-07 08:15:00	3.2	30.8	3.69	33.84	5.61333	23.9667	6.17333	26.78	0.646667	891	92.7	21.312
2019-01-07 08:30:00	3.12	6.43333	3.59	7.06	5.73333	16.3933	6.17333	21.98	0.746667	892	91.1	22.482
2019-01-07 08:45:00	3.28	218.47	3.78	240.073	6.07333	15.0833	6.57	25.1933	0.626667	892	90.9333	22.6013
2019-01-07 09:00:00	3.18667	29.95	3.66	32.9133	6.1	21.03	6.43667	26.8	0.706667	892	90.5	23.9053
2019-01-07 09:15:00	3.33333	10.4767	3.83333	11.51	6.45	16.1067	6.92667	25.2733	1.37333	892	88.0333	24.8407
2019-01-07 09:30:00	3.70667	215.45	4.26	236.75	6.85667	19.0933	7.14667	24.6733	2.1	893	84.1667	28.774
2019-01-07 09:45:00	4.31333	306.698	4.962	337.02	7.85933	14.988	8.148	24.2173	2.83333	893.667	79.25	30.4107
2019-01-07 10:00:00	4.49333	104.29	5.17333	114.607	8.25667	47.4267	8.34667	33.41	3.51667	894	74.47	29.2273
2019-01-07 10:15:00	4.88333	211.63	5.62333	232.563	8.74667	19.2533	9.20667	21.4833	4.09	894	68.6033	33.3807
2019-01-07 10:30:00	5.18333	188.577	5.96333	207.23	9.27333	21.0667	9.58667	21.9833	4.41667	894.333	64.17	38.4207
2019-01-07 10:45:00	5.47333	111.167	6.29667	122.16	9.40333	22.3367	9.59667	29.0433	4.65	895	61.38	42.6847
2019-01-07 11:00:00	6	269.207	6.91	295.833	10.2967	20.39	10.5967	24.6167	4.52333	895	59.3533	43.114
2019-01-07 11:15:00	5.94333	119.41	6.83667	131.213	10.24	19.7	10.5567	32.5267	4.80333	895	56.7	41.87
2019-01-07 11:30:00	6.33667	307.737	7.28333	338.167	10.97	15.58	10.6633	23.58	4.77667	895	55.16	42.072
2019-01-07 11:45:00	6.75333	187.257	7.76667	205.777	11.8133	17.6933	11.5933	22.7533	5.10667	894.333	51.5633	41.7327
2019-01-07 12:00:00	6.82667	176.943	7.85333	194.443	11.9533	16.8867	11.7133	21.0333	5.44	894	49.6233	41.1533
2019-01-07 12:15:00	6.80667	204.293	7.82667	224.493	12.1167	16.19	11.76	22.32	6.08	894	46.74	41.448
2019-01-07 12:30:00	6.56	196.047	7.55333	215.427	11.67	5.11667	11.2933	17.3867	6.04	894	46.0267	38.036
2019-01-07 12:45:00	6.31333	139.533	7.26	153.32	11.2933	11.9367	11.08	19.9567	6.72	894	45.8233	35.078
2019-01-07 13:00:00	6.00667	54.34	6.90667	59.7133	10.6867	17.2567	10.4	24.4433	7.12	894	44.4533	33.736
2019-01-07 13:15:00	5.73	112.397	6.59667	123.507	10.21	14.8933	9.70667	18.07	6.88	894	43.3933	31.1373
2019-01-07 13:30:00	5.29	108.47	6.08333	119.193	9.34333	14.3067	9.06	24.7967	6.76	894	42.76	24.156
2019-01-07 13:45:00	4.93267	55.474	5.67333	60.956	8.67667	13.2713	8.33333	22.5333	6.778	894	42.36	19.0753
2019-01-07 14:00:00	4.57333	183.757	5.26	201.93	7.77333	10.79	7.33333	20.6567	7.15333	893.667	42.06	15.654
2019-01-07 14:15:00	4.26	271.087	4.90667	297.9	7.41333	10.5467	6.98667	13.22	7.67667	893	40.38	12.4527
2019-01-07 14:30:00	4.27333	279.407	4.91333	307.033	6.92667	12.9933	6.90667	23.0733	7.25667	893	40.52	12.2413
2019-01-07 14:45:00	4.18	206.287	4.81333	226.69	7.37667	12.97	6.93333	13.6367	8.00667	893	39.7433	10.4407
2019-01-07 15:00:00	4.14	199.98	4.76667	219.757	7.21667	8.35667	6.68333	23.9367	8.17333	893	39.11	9.302
2019-01-07 15:15:00	3.35667	39.7733	3.85667	43.6933	5.93	238.197	5.79333	21.9	8.05	893	38.9067	7.31933
2019-01-07 15:30:00	3.51667	96.0733	4.04333	105.567	6.24333	16.9033	6.04667	28.9467	8.11	893	38.24	7.15867
2019-01-07 15:45:00	3.88	2.93333	4.46333	3.21333	6.69	19.42	6.46333	16.54	7.61333	893	38.04	9.058
2019-01-07 16:00:00	3.17333	81.08	3.65667	89.0867	5.72333	27.5333	5.35667	27.0867	7.37333	893	38.3033	5.51067
2019-01-07 16:15:00	3.20333	215.317	3.69	236.607	5.58	17.02	6.00333	29.9733	7.07	893	37.9833	3.068
2019-01-07 16:30:00	3.51	185.417	4.03667	203.74	5.90667	20.44	6.28333	39.2267	6.76333	893	38.7567	3.804
2019-01-07 16:45:00	3.03133	287.007	3.48533	315.387	5.434	26.4807	5.27333	32.3587	6.62667	893	39.2207	5.854
2019-01-07 17:00:00	3.02333	224.28	3.48667	246.467	5.41667	24.0967	5.19333	45.2267	6.17333	893	40.19	6.13
2019-01-07 17:15:00	2.86	244.913	3.3	269.133	5.31333	38.71	4.99	31.6567	5.52333	893	41.2267	7.88067
2019-01-07 17:30:00	3.32667	229.027	3.82667	251.667	5.84	37.9633	4.54333	33.7033	5.03667	893	41.72	9.45867
2019-01-07 17:45:00	3.15333	303.317	3.62667	333.3	5.64667	48.7033	4.07333	28.1567	4.64667	892.333	42.6867	11.572
2019-01-07 18:00:00	2.80667	124.637	3.23333	136.953	4.92	47.41	3.66667	23.3767	4.41333	892	42.9867	14.236
2019-01-07 18:15:00	3.15	200.207	3.62	220	5.81	33.8167	4.49333	29.62	3.98333	892	44.3533	12.8087
2019-01-07 18:30:00	2.31667	181.7	2.66667	199.667	4.29	53.0167	3.42	32.8667	3.71667	892	44.9167	10.912
2019-01-07 18:45:00	2.8	307.12	3.22	337.5	5.13333	29.91	4.30667	23.15	3.54333	892	44.57	12.0233
2019-01-07 19:00:00	3.49333	102.223	4.02	112.333	6.14667	15.9033	5.5	22.65	3.36333	892	45.7567	14.2447
2019-01-07 19:15:00	3.79333	269.583	4.36	296.233	7.25667	16.09	7.29333	31.9767	2.93	892.667	47.94	11.0773
2019-01-07 19:30:00	3.08667	204.003	3.55333	224.167	6.01667	22.4833	6.42667	21.3233	2.69	893	48.9067	7.33267
2019-01-07 19:45:00	2.64667	235.643	3.04333	258.933	5.23333	18.25	5.94333	32.0767	2.29333	893	50.85	4.062
2019-01-07 20:00:00	2.37333	254.143	2.73	279.267	4.50667	11.2433	5.35	48.31	2.28	893	51.18	2.75533
2019-01-07 20:15:00	2.278	86.3947	2.61933	94.934	4.39533	11.6967	4.67333	33.0287	2.20667	893	50.92	2.47133
2019-01-07 20:30:00	2.12333	71.1933	2.44333	78.2333	3.97333	10.6133	4.23	24.88	2.23	893	51.0233	3.97467
2019-01-07 20:45:00	2.45333	231.14	2.82	253.997	4.71333	9.12333	5.07333	18.2933	2.05667	893	52.5033	6.15933
2019-01-07 21:00:00	2.63333	222.587	3.02667	244.597	5.10667	10.8767	5.16667	18.7	2.00333	893	53.5633	7.13067
2019-01-07 21:15:00	2.69667	319.56	3.1	351.167	4.57333	14.6267	4.75333	21.31	2.08333	893	53.75	7.88133
2019-01-07 21:30:00	2.55667	309.853	2.94	340.5	4.71333	7.62	5.01333	14.3167	1.87667	893	55.8567	8.55133
2019-01-07 21:45:00	2.70667	185.477	3.12667	203.813	4.9	14.06	5.08	18.68	1.48	893	58.0333	8.27267
2019-01-07 22:00:00	2.76	14.3567	3.18	15.7733	4.87333	10.5267	4.84333	13.7	1.46667	893	59.0467	7.85467
2019-01-07 22:15:00	2.47333	199.87	2.84667	219.64	4.20333	5.62333	4.52	19.75	1.47333	893	60.2167	8.07467
2019-01-07 22:30:00	2.43333	199.517	2.8	219.24	4.13333	20.09	4.40667	25.3967	1.50667	894	60.93	7.75867
2019-01-07 22:45:00	2.49	98.8733	2.86	108.647	4.19333	16.4467	4.38333	13.3567	1.35333	894	62.44	7.308
2019-01-07 23:00:00	2.58333	310.46	2.98	341.167	4.56	11.4533	4.73667	11.1367	1.23333	894	64.5867	7.42533
2019-01-07 23:15:00	2.63333	98.5967	3.02667	108.34	5.05	7.98333	5.41333	15.2867	0.963333	894	66.0867	8.622
2019-01-07 23:30:00	2.83333	99.4567	3.26	109.28	5.33	7.39667	5.90667	19.34	0.723333	894	67.1333	10.1207
2019-01-07 23:45:00	3.44	309.62	3.95333	340.233	6.22667	12.49	6.59	20.13	0.58	894	68.1967	12.532
2019-01-08	4.00667	298.94	4.60667	328.5	6.2	5.15667	6.37	28.1233	0.8	894	67.5033	18.5607
2019-01-08 00:15:00	4.32333	6.31333	4.97667	6.93	6.4	1.25667	6.63	22.2267	0.663333	894	68.0567	26.2673
2019-01-08 00:30:00	4.38333	173.027	5.04333	190.137	6.96667	3.53	7.33667	10.58	0.41	893	69.25	33.1873
2019-01-08 00:45:00	4.67	302.277	5.38	332.167	7.55	237.05	7.53	15.0933	0.286667	893	69.8733	38.588
2019-01-08 01:00:00	4.75667	313.13	5.46667	344.1	7.52333	1.73667	7.55667	12.4	0.173333	893	70.0433	41.18
2019-01-08 01:15:00	5.22	215.05	6.01667	236.31	8.20667	12.3567	8.33667	18.4367	0.056667	893	70.18	42.152
2019-01-08 01:30:00	5.20667	222.69	5.99	244.71	8.32	27.7967	8.61	17.1233	0.13	893	69.6633	41.7447
2019-01-08 01:45:00	5.08	115.353	5.84	126.753	8.71667	11.5567	8.69	12.05	0.1	893	69.4267	40.5653
2019-01-08 02:00:00	5.16	107.113	5.93333	117.7	8.44333	5.29667	8.59667	25.01	0.086667	893	69.6533	40.3653
2019-01-08 02:15:00	5.19333	28.32	5.96933	31.118	8.23267	52.9227	8.18933	18.3587	0.019333	893	70.7213	39.3513
2019-01-08 02:30:00	5.18	147.513	5.96333	162.093	8.83667	114.8	8.9	6.87667	-0.083333	892.333	71.5433	38.1427
2019-01-08 02:45:00	5.03667	321.56	5.8	353.367	8.41333	224.393	8.32	126.207	-0.056667	893	71.7133	37.582
2019-01-08 03:00:00	5.33	316.103	6.14	347.367	8.77333	0.36	8.87333	123.627	0.17	893	70.9333	36.586
2019-01-08 03:15:00	4.8	80.8667	5.53	88.8533	8.1	123.733	8.24	4.05333	0.16	893	70.7533	37.6053
2019-01-08 03:30:00	4.97333	234.64	5.72333	257.833	8.10667	348.2	8.7	11.0467	0.113333	893	70.34	37.5267
2019-01-08 03:45:00	5.06267	218.052	5.824	239.613	7.97333	55.748	8.64867	12.09	0.288667	893	67.9893	38.674
2019-01-08 04:00:00	5.18	39.8333	5.96333	43.7667	8.01333	10.28	8.73667	7.11667	0.51	893	65.9067	38.4953
2019-01-08 04:15:00	5.12667	201.593	5.89667	221.523	8.20333	120.193	8.70333	15.6167	0.533333	893	65.7333	39.2313
2019-01-08 04:30:00	5.18667	6.56667	5.97	7.21	8.18333	117.1	8.52333	15.5033	0.5	892.667	66.77	39.4173
2019-01-08 04:45:00	5.27067	21.9907	6.064	24.16	8.51533	12.8807	8.44067	11.256	0.468	892	68.5367	37.99
2019-01-08 05:00:00	5.26667	44.6233	6.05667	49.0333	8.21667	237.39	8.22333	8.80333	0.32	892	70.03	38.4847
2019-01-08 05:15:00	5.154	25.68	5.924	28.21	8.37	342.84	8.084	288.238	0.27	892	71.344	37.4173
2019-01-08 05:30:00	4.71	21.4333	5.41333	23.55	7.73333	351.667	7.86667	240.53	0.303333	892	72.16	36.948
2019-01-08 05:45:00	4.84667	43.66	5.58333	47.9667	7.68333	347.3	7.55333	237.947	0.226667	892	73.2467	38.7433
2019-01-08 06:00:00	5.02	21.7267	5.78333	23.8667	7.48667	328.433	7.48	5.12667	0.126667	892	74.7933	39.7007
2019-01-08 06:15:00	5.09333	215.557	5.86	236.867	8.03667	114.88	7.89333	13.72	0.163333	892	75.34	37.0633
2019-01-08 06:30:00	4.97333	110.91	5.72667	121.873	8.14333	352.6	7.96	16.12	0.196667	892	75.7833	35.992
2019-01-08 06:45:00	4.98667	23.9167	5.73667	26.2833	8.39	116.3	8.17	24.2367	0.28	892	75.6167	36.2287
2019-01-08 07:00:00	4.66667	20.3433	5.37	22.3567	8.21	354.067	7.98333	26.1167	0.32	892	75.4833	34.6653
2019-01-08 07:15:00	4.63333	284.173	5.32667	312.267	8.03333	116.76	7.96667	3.16333	0.266667	892	76.6333	35.76
2019-01-08 07:30:00	4.60667	117.4	5.29333	129	7.53333	114.827	7.54667	5.75667	0.22	892	77.4733	37.3313
2019-01-08 07:45:00	4.86667	214.167	5.6	235.347	7.39667	335.6	7.03	234.947	0.226667	892	78.3033	38.9173
2019-01-08 08:00:00	4.81333	210.587	5.53333	231.413	7.53667	351.067	7.26333	8.47333	0.126667	892	79.39	37.5547
2019-01-08 08:15:00	4.74	211.253	5.45333	232.133	7.07	8.94	6.46667	9.95667	0.006667	892	80.1533	38.6073
2019-01-08 08:30:00	4.96667	14.9533	5.71333	16.42	7.49	233.167	7.08667	145.43	-0.006667	892	80.4667	36.0387
2019-01-08 08:45:00	4.27333	285.68	4.92333	313.933	7.50667	237.07	7.43667	7.02	0.116667	892	80.0467	31.7547
2019-01-08 09:00:00	3.98667	119.18	4.58333	130.96	7.01333	238.337	6.98333	12.2933	0.27	892.333	79.4767	30.846
2019-01-08 09:15:00	4.20333	19.03	4.84	20.91	7.42333	119.447	7.37333	21.21	0.353333	893	79.63	32.8247
2019-01-08 09:30:00	4.55867	39.0007	5.25467	42.846	7.976	346.753	7.44467	39.2427	0.514667	893	78.75	32.492
2019-01-08 09:45:00	4.43	104.053	5.1	114.34	7.64667	236.983	7.46	240.817	0.703333	893	78.4533	31.408
2019-01-08 10:00:00	4.43	111.88	5.1	122.94	7.14667	2.33667	7.20667	5.74333	0.776667	893	78.6533	30.542
2019-01-08 10:15:00	4.50667	38.22	5.18667	41.9867	7.43333	238.833	7.60333	127.013	0.946667	893.667	78.6067	29.318
2019-01-08 10:30:00	4.46667	205.42	5.14667	225.733	7.6	8.86	7.68333	122.393	1.14667	894	78.0833	27.366
2019-01-08 10:45:00	4.45333	17.0433	5.13333	18.73	7.19	14.9067	7.40333	12.1867	1.05333	894	78.61	23.638
2019-01-08 11:00:00	4.32667	188.617	4.98667	207.263	7.12	12.1333	7.17	242.82	1.13333	894	78.3967	20.964
2019-01-08 11:15:00	3.88667	106.653	4.46667	117.2	6.30333	117.74	6.16	238.987	1.42333	894	77.3667	21.2187
2019-01-08 11:30:00	4.04667	110.153	4.65333	121.04	6.80333	122.2	6.82	9.63333	1.62333	894	76.6733	20.0367
2019-01-08 11:45:00	3.78	5.03	4.35	5.52	6.57	354.8	6.59	12.82	1.94	894	75.32	17.1053
2019-01-08 12:00:00	3.948	222.795	4.54467	244.821	6.55	28.304	6.546	23.5667	1.89333	894	75.1533	14.8947
2019-01-08 12:15:00	4	216.597	4.59667	238.017	6.48	6.77	6.46333	13.19	2.07667	893.333	74.21	14.66
2019-01-08 12:30:00	3.85333	179.963	4.43	197.75	6.51333	8.73	6.36	11.9233	2.17	893	73.77	12.092
2019-01-08 12:45:00	3.56667	220.89	4.11333	242.733	6.16333	16.18	5.86	11.8	2.56	893	71.7033	11.778
2019-01-08 13:00:00	3.88	109.223	4.46667	120.027	6.47	15.1467	6.18	16.4067	2.7	892.667	71.0167	10.8167
2019-01-08 13:15:00	3.86	8.19667	4.44333	9.00333	6.31	20.2333	5.90667	15.4667	2.91667	892	70.9833	9.442
2019-01-08 13:30:00	4	191.603	4.60333	210.557	6.20333	18.8733	5.95333	6.66667	2.92333	892	70.4433	8.12933
2019-01-08 13:45:00	3.90533	30.3933	4.50467	33.3953	6.27467	17.3753	5.882	25.1313	3.11733	891.333	69.7613	6.38
2019-01-08 14:00:00	3.67333	23	4.23	25.2767	6.06333	15.0367	5.51	26.1233	3.27	891	69.15	4.86067
2019-01-08 14:15:00	3.18667	297.67	3.66333	327.1	5.32333	15.3833	5.01	24.6433	3.09667	891	69.65	4.456
2019-01-08 14:30:00	3.18667	86.3567	3.66333	94.8933	5.24333	24.5633	4.84667	25.2433	3.05667	891	70.1233	4.82933
2019-01-08 14:45:00	3.21333	192.04	3.70333	211.027	5.29333	17.38	4.88667	12.0367	3.09333	891	70.2967	4.528
2019-01-08 15:00:00	3.37333	7.14667	3.88333	7.84667	5.77333	8.23333	5.48	18.2833	3.12	890	70.5633	5.13467
2019-01-08 15:15:00	3.20667	4.44	3.69667	4.87	5.65333	3.40333	5.54	21.7033	3.06667	890	70.97	5.91533
2019-01-08 15:30:00	3.29333	29.1067	3.79	31.9833	5.80667	10.7033	5.52	18.1033	3.12	890	71.1967	5.07067
2019-01-08 15:45:00	3.09	250.377	3.56	275.133	5.86667	25.2767	5.52667	16.1633	3.03667	890	71.6067	5.21133
2019-01-08 16:00:00	2.86333	60.0367	3.29333	65.9667	5.30667	10.8767	5.14667	16.5367	3.02333	890	71.9567	5.95867
2019-01-08 16:15:00	2.92	80.99	3.36333	88.9933	5.45667	13.36	5.31	17.3333	2.67	890	73.2433	7.532
2019-01-08 16:30:00	2.92	68.4033	3.35667	75.1667	5.59	23.6533	5.51667	28	2.43667	890	74.9767	7.8
2019-01-08 16:45:00	2.852	279.257	3.27933	306.87	5.52933	6.152	5.61867	20.288	2.268	890	76.0873	7.312
2019-01-08 17:00:00	3.07333	117.24	3.53333	128.833	5.81333	15.5967	5.93667	10.4833	2.13333	890	75.8467	8.256
2019-01-08 17:15:00	3.03333	220.94	3.48667	242.777	5.82	17.76	5.67333	22.9733	2.02	890	76.1533	7.774
2019-01-08 17:30:00	3.00667	100.993	3.46	110.977	5.64667	19.7267	5.68	18.8067	1.94	890	76.72	9.052
2019-01-08 17:45:00	3.16	251.553	3.64333	276.433	6	24.3267	6.26	29.35	1.81667	890	77.0667	11.3513
2019-01-08 18:00:00	3.18667	116.147	3.66333	127.633	6.05333	14.7267	6.37333	22.3767	1.71	891	77.44	13.872
2019-01-08 18:15:00	4.16667	109.88	4.80667	120.747	7.49667	21.3267	7.64	18.36	1.59	890.333	77.7633	15.054
2019-01-08 18:30:00	3.98	170.088	4.59067	186.905	7.338	23.6813	7.39733	18.3093	1.48733	891	78.0913	16.7727
2019-01-08 18:45:00	4.22667	149.68	4.86667	164.487	7.92667	10.7	7.86667	23.16	1.36667	891	78.33	20.0127
2019-01-08 19:00:00	4.49333	15.3067	5.17333	16.82	8.30667	11.6933	8.38	18.4867	1.3	891	78.4833	20.6813
2019-01-08 19:15:00	4.68	99.7167	5.38	109.567	8.34	12.89	8.30667	24.28	1.16667	891	79.1533	21.8667
2019-01-08 19:30:00	5.02667	230.39	5.78	253.167	8.73333	17.2567	8.60667	24.6	1.08667	891	79.14	23.7333
2019-01-08 19:45:00	4.784	45.92	5.506	50.46	8.68	14.64	8.554	27.656	0.978	891	79.468	22.0333
2019-01-08 20:00:00	4.73333	10.8933	5.45	11.9733	8.76	16.3467	8.55	23.94	0.89	891	80.5667	25.866
2019-01-08 20:15:00	4.68	61.5967	5.38333	67.6867	8.58	12.3033	8.38333	19.9233	0.783333	891	81.1	28.242
2019-01-08 20:30:00	4.93333	26.6833	5.67667	29.32	9.23333	11.33	9.01667	19.0167	0.71	891	81.5	28.6213
2019-01-08 20:45:00	5.07667	116.053	5.84333	127.533	8.64333	124.013	8.2	28.1767	0.646667	891	81.1333	28.172
2019-01-08 21:00:00	5.00333	112.2	5.75667	123.3	7.99	124.647	7.62	28.39	0.613333	891	81	24.614
2019-01-08 21:15:00	4.49333	111.18	5.16667	122.17	7.26333	20.92	6.94667	18.1	0.563333	891	80.9333	24.3013
2019-01-08 21:30:00	4.48	206.187	5.15333	226.57	6.66333	16.28	6.61333	8.4	0.51	891.333	80.9667	23.1853
2019-01-08 21:45:00	4.38	108.647	5.04333	119.387	7.11333	9.92333	6.93667	21.1367	0.47	892	80.9667	24.5853
2019-01-08 22:00:00	4.48667	310.713	5.17	341.433	7.36667	239.103	7.04333	23.07	0.436667	892	81.3	24.2347
2019-01-08 22:15:00	4.08667	11.8367	4.70333	13.0067	7.40333	123.46	7.13333	14.3333	0.373333	891.333	81.7	21.8707
2019-01-08 22:30:00	4.07333	200.357	4.68333	220.167	6.82667	351.3	6.40667	21.5067	0.353333	892	81.7	22.1087
2019-01-08 22:45:00	4.04667	40.39	4.66	44.3733	7.21667	239.863	6.89667	4.10667	0.34	892	81.3	24.5993
2019-01-08 23:00:00	4.35333	32.1033	5.02	35.2733	7.27	239.863	7.02333	3.63333	0.326667	892	80.9667	24.96
2019-01-08 23:15:00	4.38	108.423	5.05	119.147	7.37667	14.97	6.86	12.37	0.34	892	80.1333	22.5873
2019-01-08 23:30:00	4.27333	120.583	4.92333	132.507	7.11667	15.2767	6.65333	24.2233	0.32	891.333	80.4333	24.7427
2019-01-08 23:45:00	4.48	3.19333	5.15667	3.5	7.3	41.5333	6.85	15.2367	0.3	891.333	80.11	24.844
2019-01-09	4.57333	4.99333	5.26333	5.48	7.24	49.22	7.05667	242.543	0.3	891	79.7233	24.0573
2019-01-09 00:15:00	4.58333	27.6633	5.27533	30.3967	7.61533	20.9867	7.468	84.3547	0.314	891	79.06	24.7307
2019-01-09 00:30:00	4.47	182.69	5.15333	200.75	7.96	17.1333	7.64667	18.6667	0.286667	891	79.0733	25.0693
2019-01-09 00:45:00	4.53	111.19	5.22	122.173	8.16667	21.8367	7.89333	9.99333	0.27	891	79.1967	24.1367
2019-01-09 01:00:00	4.68333	324.697	5.4	356.8	7.88667	246.817	7.49333	3.84667	0.263333	891	79.08	24.4307
2019-01-09 01:15:00	4.57	25.48	5.25333	27.9933	7.85667	31.59	7.50667	23.7333	0.25	891	78.76	24.2213
2019-01-09 01:30:00	4.46333	57.2067	5.13333	62.86	7.82333	16.0567	7.32667	243.867	0.21	891	78.69	23.2187
2019-01-09 01:45:00	4.35667	5.97333	5.01	6.56	7.29	4.15333	7.08667	13.63	0.193333	891	78.5567	19.7893
2019-01-09 02:00:00	4.32333	221.573	4.97667	243.487	7.01	15.0333	7	17.1967	0.146667	891	78.7533	19.42
2019-01-09 02:15:00	4.20667	11.6	4.84	12.7467	7.01	6.82667	6.74	4.57333	0.08	891	79.64	20.6733
2019-01-09 02:30:00	3.98667	18.1133	4.58667	19.9	6.89	10.14	6.52	15.1	0.04	891	79.8267	20.886
2019-01-09 02:45:00	4.392	78.982	5.05667	86.7847	7.67067	355.14	7.44467	10.578	0.014667	891	80.3	20.3287
2019-01-09 03:00:00	4.26	256.433	4.91	281.8	7.62333	354.633	7.31	5.25667	-0.006667	890.333	80.3333	21.336
2019-01-09 03:15:00	4.16	196.95	4.79667	216.417	7.63333	118.72	7.33667	11.3967	-0.056667	890.333	81.0333	16.7553
2019-01-09 03:30:00	4.06667	0.343333	4.68333	0.376667	7.14667	347.3	6.72333	2.61	-0.196667	890	83.1	9.89133
2019-01-09 03:45:00	4.04	289.623	4.65333	318.267	7.29667	12.5333	7.12	4.81667	-0.41	890	86.1667	9.05333
2019-01-09 04:00:00	4.12	108.563	4.74	119.293	7.59	4.76667	7.22667	13.9167	-0.496667	890	86.8333	7.6
2019-01-09 04:15:00	3.69333	269.977	4.25	296.667	6.81667	9.94333	6.64	11.5133	-0.546667	890	87.3	7.30933
2019-01-09 04:30:00	3.64	162.71	4.19	178.8	6.86333	3.84333	6.61333	5.45333	-0.566667	890	86.9667	7.98267
2019-01-09 04:45:00	3.68667	6.12333	4.24333	6.72333	6.97	239.117	6.63	10.72	-0.546667	890	86.6333	7.30133
2019-01-09 05:00:00	3.34667	204.537	3.85	224.757	6.17667	3.24333	6.09	11.9867	-0.526667	890	86.4333	6.63933
2019-01-09 05:15:00	3.30667	122.103	3.81333	134.173	6.08333	32.5467	5.94333	13.69	-0.493333	890	86.1667	7.29333
2019-01-09 05:30:00	3.61333	285.35	4.16	313.567	6.41	17.7733	6.16333	19.0233	-0.493333	890	86.3333	7.79067
2019-01-09 05:45:00	3.64667	221.683	4.19333	243.61	6.33667	9.06667	5.96	19.3967	-0.533333	889.333	87.3333	7.99333
2019-01-09 06:00:00	3.59333	31.1633	4.14	34.2433	6.04333	17.8067	5.8	24.3767	-0.586667	889.667	88.2667	7.454
2019-01-09 06:15:00	3.69333	318.903	4.25333	350.433	6.51333	13.39	6.15667	12.68	-0.663333	889	89.2333	7.064
2019-01-09 06:30:00	3.65333	315.777	4.20667	347	6.50667	12.1233	5.95667	12.0667	-0.73	889	90.1667	6.60533
2019-01-09 06:45:00	3.79	290.867	4.35667	319.633	6.71667	8.61	6.39	9.65333	-0.806667	889	91.7667	6.59533
2019-01-09 07:00:00	3.96333	277.287	4.56333	304.7	6.93	15.3433	6.49667	25.04	-0.906667	889	93.0333	6.76067
2019-01-09 07:15:00	4.07	293.273	4.68333	322.267	7.27	13.76	6.76	18.1033	-1.00667	889	94.7333	6.46467
2019-01-09 07:30:00	4.06	314.567	4.67	345.667	6.90333	11.0533	6.58	26.6167	-1.07333	889	95.8	6.06267
2019-01-09 07:45:00	3.85	299.54	4.43	329.167	6.44667	16.22	5.99	15.99	-1.12667	889	96.8333	6.53
2019-01-09 08:00:00	3.98333	108.647	4.58333	119.38	6.5	240.073	5.95333	22.4433	-1.14667	889	97.3	6.78667
2019-01-09 08:15:00	3.77333	22.6267	4.34	24.8567	6.38	223.74	5.96333	28.01	-1.16	889	97.8	6.09267
2019-01-09 08:30:00	3.96	67.26	4.55333	73.91	6.33667	73.0067	6.08333	14.43	-1.16	889	98.2	5.59267
2019-01-09 08:45:00	3.58	301.523	4.11667	331.333	5.69	238.027	5.43333	236.137	-1.16	889	98.3667	4.05133
2019-01-09 09:00:00	3.02	313.41	3.47	344.4	4.72333	7.17333	4.66667	12.0367	-1.15333	889	98.6333	3.09733
2019-01-09 09:15:00	3.57333	9.96	4.12	10.9467	4.82	9.40333	4.66	13.9933	-1.16333	889	98.7	2.976
2019-01-09 09:30:00	3	215.333	3.45333	236.62	4.41333	7.33	4.30667	7.02	-1.12333	889	98.9333	0.934
2019-01-09 09:45:00	2.85333	306.767	3.28	337.1	3.94667	25.4133	3.78333	239.41	-1.06	889	99	0.546
2019-01-09 10:00:00	2.81333	93.7467	3.23333	103.013	3.44	236.533	3.29	5.22333	-1.05333	890	98.9667	0.400667
2019-01-09 10:15:00	2.32667	108.383	2.68	119.093	3.46333	2.32333	3.12	234.237	-0.98	890	98.9	0.018
2019-01-09 10:30:00	2.428	314.008	2.796	345.06	3.442	2.476	3.488	5.504	-0.936	890	99.12	0
2019-01-09 10:45:00	2.33333	11.5433	2.68	12.6867	3.42333	5.22333	3.46333	13.04	-0.92	890	99.5667	0
2019-01-09 11:00:00	2.45333	13.6033	2.82	14.94	3.65667	10.43	3.41	13.04	-0.893333	890	99.8333	0
2019-01-09 11:15:00	2.69	128.4	3.09667	141.1	4.05	4.15667	4.09333	241.907	-0.85	890	99.9667	0.584667
2019-01-09 11:30:00	2.64333	310.033	3.04333	340.7	4.18333	4.05667	4.1	16.3	-0.803333	890	100	0.847333
2019-01-09 11:45:00	2.86	1.42333	3.28667	1.55667	4.61667	118.34	4.40333	9.81667	-0.82	889.333	100	0.414
2019-01-09 12:00:00	2.92	1.88467	3.36467	2.062	4.43133	187.166	4.21267	172.535	-0.878667	889	100	0
2019-01-09 12:15:00	2.84667	216.537	3.27667	237.95	4.09667	2.59	3.88	43.57	-0.896667	889	100	0.144667
2019-01-09 12:30:00	3.08667	214.05	3.55	235.217	4.08333	3.65	3.85333	19.51	-0.91	889	100	0
2019-01-09 12:45:00	3.24667	321.117	3.73333	352.867	4.14667	0.15	3.79667	3.95667	-0.933333	889	100	0
2019-01-09 13:00:00	3.22667	107.837	3.71333	118.5	3.83333	6.26333	3.53	7.55667	-0.946667	888	100	0
2019-01-09 13:15:00	2.60667	11.1133	3.00667	12.2067	3.54	14.5633	3.30667	9.22667	-0.883333	888	100	0
2019-01-09 13:30:00	2.66667	203.747	3.06667	223.9	3.42667	10.8633	3.08667	13.48	-0.923333	888	100	0
2019-01-09 13:45:00	2.36333	316.527	2.72	347.833	3.35333	10.85	3.08667	18.6767	-0.873333	888	100	0
2019-01-09 14:00:00	2.15	319.32	2.47333	350.9	3.34667	6.61667	2.94667	36.6967	-0.846667	887.667	100	0
2019-01-09 14:15:00	2.4	308.333	2.76	338.833	3.09333	142.093	2.76667	126.44	-0.873333	887	100	0
2019-01-09 14:30:00	2.54	304.827	2.92	334.967	2.88	356.167	2.98667	124.74	-0.893333	887	100	0
2019-01-09 14:45:00	2.34333	8.64333	2.69333	9.5	2.56	0.293333	2.57333	3.11667	-0.88	887	100	0
2019-01-09 15:00:00	2.45667	211.837	2.82667	232.787	3.00667	23.2733	2.62	4.61	-0.873333	887	100	0
2019-01-09 15:15:00	2.49333	30.46	2.87	33.4667	3.33	13.7067	2.71667	4.23	-0.836667	887	100	0
2019-01-09 15:30:00	2.5	245.673	2.87667	269.967	3.63	10.9467	2.72333	5.89	-0.81	887	100	0
2019-01-09 15:45:00	2.6	125.39	2.99333	137.787	3.96333	2.23	3.28	13.2333	-0.786667	887	100	0
2019-01-09 16:00:00	2.84	292.683	3.26667	321.633	3.95	8.44333	3.5	17.3333	-0.8	887	100	0
2019-01-09 16:15:00	2.59333	20.3433	2.99	22.3467	4.24333	9.26	3.86	6.84667	-0.776667	887	100	0.113333
2019-01-09 16:30:00	3.2	14.7633	3.68333	16.22	4.56333	234.62	4.17333	12.1133	-0.77	887	100	0.365333
2019-01-09 16:45:00	3.13333	110.19	3.60667	121.087	4.86333	0.52	4.46333	9.01	-0.753333	887	100	0.448667
2019-01-09 17:00:00	3.312	126.316	3.81	138.8	4.758	1.248	4.32	9.03	-0.79	887	100	0.713333
2019-01-09 17:15:00	2.99333	319.927	3.44667	351.567	4.49	1.26	4.20333	9.03333	-0.836667	887	100	0.512667
2019-01-09 17:30:00	3.00667	315.313	3.45333	346.5	3.96	1.26	3.73	9.02	-0.883333	887	100	0
2019-01-09 17:45:00	3.07333	103.38	3.53	113.6	4.11333	1.24	3.58333	9	-0.88	887	100	0.020667
2019-01-09 18:00:00	3.00667	319.44	3.45667	351.033	4.36	1.25333	4.05	9	-0.86	887	100	0.189333
2019-01-09 18:15:00	3.36	108.597	3.87333	119.333	4.84333	1.24667	4.61667	9	-0.863333	887	100	0.454667
2019-01-09 18:30:00	3.46	0.336667	3.98	0.366667	5.13	1.26	4.94333	9.02	-0.883333	887	100	1.158
2019-01-09 18:45:00	3.38667	212.05	3.89333	233.023	5.25667	1.26	5.21	9.02	-0.94	887	100	1.76933
2019-01-09 19:00:00	3.6	1.67	4.14	1.82333	5.44333	1.26	5.39	9.02	-1.02	887	100	2.79467
2019-01-09 19:15:00	3.58667	222.352	4.124	244.329	6.40067	1.22267	5.91933	9	-1.09267	887.667	100	3.90133
2019-01-09 19:30:00	3.28667	180.187	3.78667	198.007	5.83667	1.22667	5.88667	9	-1.13	888	100	4.174
2019-01-09 19:45:00	3.4	227.04	3.91	249.497	6.14333	1.23333	5.87667	9	-1.16333	888	100	4.41667
2019-01-09 20:00:00	3.45333	235.78	3.97	259.097	6.18333	1.22	5.75667	9.02	-1.20333	888	100	5.082
2019-01-09 20:15:00	3.94667	184.121	4.546	202.328	6.55067	1.24533	6.292	9.02267	-1.27667	888	100	5.38733
2019-01-09 20:30:00	4.53333	109.31	5.22	120.113	6.92333	1.24	6.83667	9.03667	-1.32	888	100	5.95667
2019-01-09 20:45:00	4.61667	15.8767	5.31667	17.45	7.12	1.23333	6.60667	9.01	-1.29667	888.667	100	6.22333
2019-01-09 21:00:00	4.51667	225.763	5.19667	248.083	6.93333	1.26	6.57333	9.03	-1.33	889	100	5.572
2019-01-09 21:15:00	4.39333	136.97	5.06	150.513	7.16	1.24667	6.87333	9.01667	-1.39333	889	100	5.43667
2019-01-09 21:30:00	4.56667	290.963	5.25333	319.733	7.54	1.26	7.12667	9.05	-1.38667	889	100	5.11933
2019-01-09 21:45:00	4.69333	112.953	5.4	124.127	8.08	1.26	7.77	9.05	-1.37667	889	100	3.76333
2019-01-09 22:00:00	4.89333	118.487	5.64	130.207	7.73333	1.26	7.33	9.03667	-1.41	889	100	1.24067
2019-01-09 22:15:00	5.17333	27.2133	5.96	29.8967	7.86	1.26	7.46667	9.04333	-1.45333	889	100	0.58
2019-01-09 22:30:00	5.16667	4.06	5.94	4.45	8.16667	1.26	7.89333	9.04333	-1.47333	889	100	0
2019-01-09 22:45:00	5.09667	211.883	5.86333	232.84	8.00667	1.25333	7.56	9.01	-1.5	889	100	0
2019-01-09 23:00:00	5.13667	212.917	5.91667	233.973	7.46333	1.24	7.12	9.01	-1.52	889	100	0
2019-01-09 23:15:00	5.27333	9.46	6.06333	10.3867	7.75333	1.26	7.27	9.02	-1.55333	889	100	0
2019-01-09 23:30:00	5.3	14.26	6.09667	15.66	7.88	1.26	7.21	9.03333	-1.58667	889	100	0
2019-01-09 23:45:00	5.08	149.91	5.84	164.733	8.09	1.26	7.76	9.01667	-1.6	889	100	0
2019-01-10	5.13333	318.323	5.9	349.8	7.71	1.24667	7.61333	9.01667	-1.61333	889	100	0
2019-01-10 00:15:00	4.96667	117.733	5.71667	129.38	8.21667	1.26	7.57667	9	-1.61333	889	100	0
2019-01-10 00:30:00	4.96	282.007	5.71667	309.9	8.05667	1.23333	7.57	9	-1.62667	889	100	0
2019-01-10 00:45:00	5.08	11.72	5.84667	12.87	8.80333	1.22	8.33333	9	-1.61333	889	100	0
2019-01-10 01:00:00	5.3	21.8867	6.10667	24.0433	9.07667	1.23333	8.58667	9	-1.60667	889	100	0
2019-01-10 01:15:00	5.45333	124.263	6.28667	136.547	9.01	1.26	8.42333	9.01	-1.59333	889	99.9	0
2019-01-10 01:30:00	5.29333	249.257	6.09333	273.9	8.80333	1.24667	8.23667	9.01	-1.57333	889	99.5667	0
2019-01-10 01:45:00	5.5	64.13	6.32333	70.47	9.24	1.26	8.74333	9	-1.58	889	99.1	0
2019-01-10 02:00:00	5.6	18.5367	6.44333	20.37	8.7	1.24667	8.45667	9	-1.58	888	98.6333	0
2019-01-10 02:15:00	6.13	95.6067	7.05	105.067	9.25333	1.22667	8.80667	9.03	-1.55	888	97.9	0
2019-01-10 02:30:00	6.07667	297.353	6.99667	326.767	9.81333	1.25333	9.18	9.01	-1.56333	888	97.7	0
2019-01-10 02:45:00	5.46333	111.613	6.28	122.647	8.99667	1.26	8.46	9.01667	-1.59667	888	97.6667	0
2019-01-10 03:00:00	5.83	313.02	6.70667	343.967	9.13667	1.26	8.62667	9.05	-1.61	888	97.3	0
2019-01-10 03:15:00	6.55333	312.16	7.53667	343.033	10.01	1.26	9.38667	9.02	-1.62667	888	96.9	0
2019-01-10 03:30:00	6.72667	164.627	7.74333	180.9	10.1633	1.26	9.68667	9.03333	-1.62667	888	96.7333	0
2019-01-10 03:45:00	6.45333	64.54	7.42	70.92	10.4267	1.26	9.38667	9.02	-1.63333	888	96.6667	0
2019-01-10 04:00:00	6.66667	268.573	7.66667	295.133	10.9667	1.26	10.12	9	-1.63333	888	96.6667	0
2019-01-10 04:15:00	6.956	74.196	7.99933	81.5293	11.4227	1.26	10.5973	9.022	-1.638	888	96.3	0
2019-01-10 04:30:00	6.81	190.283	7.83333	209.103	11.0867	1.26	10.6167	9.02	-1.66	888	96.2	0
2019-01-10 04:45:00	6.83	123.87	7.86333	136.12	11.6367	1.26	10.81	9.03	-1.66667	887.333	95.7	0
2019-01-10 05:00:00	7.27	298.063	8.37	327.533	12.0633	1.26	10.8633	9.01	-1.66667	887	95.6333	0
2019-01-10 05:15:00	7.39667	224.327	8.51667	246.503	11.5933	1.26	10.7433	9.03667	-1.63667	887	94.8667	0
2019-01-10 05:30:00	7.30333	168.873	8.41	185.57	11.46	1.26	10.37	9.05	-1.61	887	94.3333	0
2019-01-10 05:45:00	7.18	203.213	8.26667	223.303	12.04	1.26	10.9067	9.04333	-1.59	887	94.0667	0
2019-01-10 06:00:00	7.13333	28.58	8.21333	31.4033	12.1667	1.26	11.34	9.03	-1.56333	887	93.4333	0
2019-01-10 06:15:00	6.96333	106.703	8.02	117.253	11.8133	1.26	11	9.05	-1.55333	887	93.0333	0
2019-01-10 06:30:00	7.03	103.823	8.08667	114.087	11.8133	1.26	10.96	9.05	-1.52667	887	92.5	0
2019-01-10 06:45:00	6.50333	224.327	7.48	246.5	10.75	1.26	9.76333	9.03	-1.51	887	92.2667	0
2019-01-10 07:00:00	6.47	62.7067	7.44	68.9	10.95	1.26	10.39	9.01	-1.47	887	91.5667	0
2019-01-10 07:15:00	6.04	12.2567	6.94333	13.47	10.95	1.26	10.6367	9.03667	-1.45667	887	91.2667	0
2019-01-10 07:30:00	6.48	29.4433	7.45667	32.35	11.5567	1.26	11.0967	9.03667	-1.37	888	90.3	0
2019-01-10 07:45:00	6.68	128.717	7.68	141.433	11.5467	3.09333	11.1467	9.03	-1.26333	888	89.2	0
2019-01-10 08:00:00	6.94667	219.103	7.98667	240.767	11.68	12.3067	11.1933	9.03	-1.15	888	88.5333	0
2019-01-10 08:15:00	6.39667	105	7.36	115.373	10.4967	123.08	9.87667	9.03333	-1.10333	888	88.4	0
2019-01-10 08:30:00	6.18333	287.967	7.11333	316.433	10.8433	114.967	10.21	9	-1.08333	888	88.6333	0
2019-01-10 08:45:00	6.3	55.7967	7.24667	61.3067	10.2833	224.513	9.47	9	-1.03333	888	88.4	0
2019-01-10 09:00:00	6.18	18.19	7.10667	19.98	9.89	2.34	9.21667	9	-0.953333	888	88.1667	0
2019-01-10 09:15:00	6.45333	219.857	7.42333	241.597	10.0633	232.753	9.55	9.02	-0.89	888	87.9333	0
2019-01-10 09:30:00	5.92	191.157	6.81667	210.063	9.61667	17.3133	9.13	9	-0.83	888.333	87.9333	0
2019-01-10 09:45:00	6.25333	322.847	7.2	354.767	10.18	242.773	9.71667	9.01	-0.77	889	87.6333	9.30667
2019-01-10 10:00:00	5.87333	322.9	6.76	354.833	9.82667	8.05333	9.38333	9.04333	-0.663333	889	87.5	12.98
2019-01-10 10:15:00	6.32	194.94	7.27333	214.217	10.48	17.3167	9.62	9	-0.656667	889	87.5733	13.426
2019-01-10 10:30:00	6.57333	40.5867	7.56667	44.59	10.9067	239.23	10.06	9	-0.65	889	87.8267	13.498
2019-01-10 10:45:00	6.28	282.897	7.22667	310.867	10.29	13.3267	9.66667	9.01	-0.63	889	89	18.306
2019-01-10 11:00:00	6.16667	103.01	7.09333	113.187	9.94333	10.4867	9.48667	9.01	-0.563333	889	90	19.9133
2019-01-10 11:15:00	5.92667	262.3	6.82	288.233	9.40333	11.0833	8.97	8.95	-0.506667	889	91.3667	20.4653
2019-01-10 11:30:00	5.95333	256.6	6.84667	281.967	9.81	20.6567	9.37667	9.01667	-0.5	889	92.6333	21.318
2019-01-10 11:45:00	6.28	82.68	7.22333	90.86	10.6867	3.19333	10.3167	9.05	-0.43	889	93.4667	21.9627
2019-01-10 12:00:00	6.06	90.0333	6.97	98.9333	10.2267	3.63333	9.91	9.05	-0.423333	889	94	22.94
2019-01-10 12:15:00	6.03333	101.831	6.93867	111.891	10.058	9.08	9.51067	9.02333	-0.362667	889	94.1667	24.0233
2019-01-10 12:30:00	6.30333	324.61	7.25667	356.7	10.7633	10.5733	10.3933	9.01667	-0.226667	889	93.7667	24.0053
2019-01-10 12:45:00	6.57667	200.647	7.56333	220.483	10.9547	121.01	10.5633	9.05	-0.12	888.933	93.1333	23.634
2019-01-10 13:00:00	6.33667	13.3067	7.29667	14.6233	11.16	17.27	10.73	9.08333	0.013333	888	92.6	24.2413
2019-01-10 13:15:00	6.33	49.5	7.28	54.3967	11.21	8.85333	10.8067	9.1	0.19	888	91.8	24.344
2019-01-10 13:30:00	6.71667	38.3133	7.73333	42.1033	11.3567	7.21333	10.98	9.1	0.23	888	91.56	24.9287
2019-01-10 13:45:00	6.13333	165.923	7.05667	182.333	11.1767	16.45	10.8667	9.1	0.413333	888	90.6	25.0827
2019-01-10 14:00:00	6.39333	121.343	7.35667	133.34	11.2367	12.35	11.1733	9.19333	0.66	888	89.7333	26.674
2019-01-10 14:15:00	6.18667	299.877	7.12	329.533	11.4467	14.1933	11.5833	23.3533	0.92	888	88.4333	26.8053
2019-01-10 14:30:00	6.24667	223.497	7.18667	245.6	11.58	17.8867	11.73	20.9067	1.19333	888	87.4333	28.2067
2019-01-10 14:45:00	6.12	262.607	7.04	288.567	11.4867	13.64	11.7167	23.6033	1.49333	888	86.5	30.0607
2019-01-10 15:00:00	6.54667	59.1133	7.53333	64.96	11.92	13.3333	11.95	19.47	1.62	888	85.4333	30.73
2019-01-10 15:15:00	6.78	243.917	7.8	268.033	11.9633	4.58333	11.7833	26.7867	1.64667	888	84.6	31.712
2019-01-10 15:30:00	6.76667	217.397	7.78	238.9	12.0967	8.00333	12.1167	20.14	1.74667	888	84.4	32.012
2019-01-10 15:45:00	6.68	92.9167	7.69	102.107	12.0767	12.8733	12.09	12.7567	1.83	888	84	32.3907
2019-01-10 16:00:00	6.75333	125.483	7.77	137.893	12.3033	14.2533	12.09	9.59	1.84333	888	83.6	33.0873
2019-01-10 16:15:00	6.572	165.841	7.566	182.245	12.14	14.7193	11.8567	14.618	1.82133	888	83.6733	32.1867
2019-01-10 16:30:00	6.32	48.1467	7.27	52.9	11.6133	11.25	11.45	23.6367	1.78667	888	83.3667	33.196
2019-01-10 16:45:00	6.38	8.93333	7.34333	9.81333	11.8133	17.63	12.04	30.0167	1.76333	888	83.5	33.064
2019-01-10 17:00:00	6.56	114.673	7.55	126.007	12.1933	12.31	11.9933	24.2433	1.74333	888	83.0333	33.7327
2019-01-10 17:15:00	6.56333	114.64	7.55333	125.967	11.9867	13.03	12.1707	25.9267	1.73333	888	82.3	33.7433
2019-01-10 17:30:00	6.72333	298.42	7.74	327.933	12.3067	21.4967	12.58	27.0133	1.7	888	82.1	34.1847
2019-01-10 17:45:00	6.62667	156.003	7.62	171.433	12.1767	9.84667	12.3633	22.6433	1.66667	888	81.4	33.4967
2019-01-10 18:00:00	6.61333	127.077	7.60667	139.64	12.1767	12.0333	12.1567	21.2967	1.64	888	80.9333	33.8687
2019-01-10 18:15:00	6.43667	185.657	7.4	204.017	11.9087	28.95	12.1567	25.1933	1.57	888	81.2	33.7707
2019-01-10 18:30:00	6.33667	215.323	7.29333	236.617	11.51	28.59	12.1367	27.1267	1.57667	888	80.6667	32.66
2019-01-10 18:45:00	6.204	128.143	7.13667	140.813	11.3533	18.2033	11.7367	30.8867	1.72	888	78.56	30.112
2019-01-10 19:00:00	6.35333	266.323	7.31667	292.667	11.6	12.8833	12.07	20.3267	1.88667	888.4	76.82	30.4227
2019-01-10 19:15:00	6.14667	240.603	7.07	264.4	11.3067	15.6733	12.1387	26.81	1.79333	889	77.2293	28.788
2019-01-10 19:30:00	5.94	71.6433	6.83667	78.7333	10.92	17.0867	11.9267	25.67	1.73333	889	77.4667	29.2927
2019-01-10 19:45:00	5.88	245.973	6.76333	270.3	11.0467	14.7433	11.9633	29.08	1.69333	889	77.722	28.694
2019-01-10 20:00:00	5.95333	102.14	6.85	112.233	11.1467	16.8167	11.93	26.1933	1.64667	889	77.53	30.4213
2019-01-10 20:15:00	6.11333	200.083	7.03333	219.863	11.66	21.7467	12.3067	24.43	1.59	889	77.6247	32.2833
2019-01-10 20:30:00	6.24667	168.29	7.18667	184.93	11.7533	14.58	12.2867	23.2167	1.55	889	77.8367	31.2527
2019-01-10 20:45:00	6.04667	204.08	6.96	224.267	11.26	15.36	11.78	22.7933	1.68333	889.733	76.43	31.3193
2019-01-10 21:00:00	6.17333	291.513	7.1	320.333	11.2667	9.30667	11.82	25.92	1.63	890	76.3633	30.5807
2019-01-10 21:15:00	6.25333	218.383	7.19667	239.967	11.4267	14.12	11.5	20.16	1.53	890	76.6333	30.35
2019-01-10 21:30:00	6.13333	193.323	7.05	212.433	11.2	12.0267	11.1667	21.26	1.27	890	78.2333	31.204
2019-01-10 21:45:00	6.45333	72.7067	7.42667	79.8867	11.43	13.9267	11.1733	21.69	1.19667	890	78.804	32.696
2019-01-10 22:00:00	5.95333	167.847	6.84667	184.433	10.57	11.6533	10.34	16.21	1.03	890	80.0133	31.4107
2019-01-10 22:15:00	5.66667	120.573	6.52067	132.493	10.12	126.213	9.98333	18.21	0.873333	890	81.1667	30.8413
2019-01-10 22:30:00	5.61333	112.467	6.45667	123.587	10.0733	129.187	10.09	21.0633	0.726667	890	81.7	31.238
2019-01-10 22:45:00	5.74667	195.603	6.61667	214.953	10.2233	10.7333	10.3333	16.15	0.786667	890	80.6	31.5087
2019-01-10 23:00:00	5.585	22.785	6.42	25.035	9.99	10.45	10.205	13.6	0.855	890	79.9	31.795
2019-01-10 23:15:00	5.54667	35.0433	6.39333	38.5067	9.87	10.7	10.1993	17.1733	0.553333	890	81.9667	30.9487
2019-01-10 23:30:00	5.48	67.6767	6.30667	74.3667	9.49667	7.75333	9.91	6.21333	0.28	890	83.9667	29.86
2019-01-10 23:45:00	4.75	212.61	5.46	233.627	8.53333	8.05333	8.76333	15.6533	-0.023333	889.267	85.8667	29.6093
2019-01-11	4.32	4.21	4.966	4.622	7.846	9.002	7.902	18.68	-0.272	889	87.58	25.5127
2019-01-11 00:15:00	3.90333	10.1367	4.49667	11.1333	6.60667	242.813	6.94	5.09333	-0.41	889	88.2667	23.4033
2019-01-11 00:30:00	4.01	205.803	4.61	226.153	6.87333	31.8533	7.12	7.39333	-0.41	889	87.5333	23.3093
2019-01-11 00:45:00	3.82667	197.88	4.40333	217.45	7.03333	7.94667	7.32	12.4867	-0.553333	889	88.3	25.4473
2019-01-11 01:00:00	3.912	186.848	4.51	205.32	7.412	15.56	7.712	19.182	-0.88	889	90.7	23.6073
2019-01-11 01:15:00	3.96667	113.783	4.56333	125.033	6.95333	120.6	6.98333	14.2867	-1.00333	889	92.1	21.106
2019-01-11 01:30:00	4.02	96.19	4.62333	105.7	6.41333	116.393	6.36333	6.71333	-0.556667	889	89.1	21.136
2019-01-11 01:45:00	4.00667	126.477	4.60667	138.98	6.43333	2.71	6.36667	9.03667	-0.46	889	87.5	25.3107
2019-01-11 02:00:00	4.20667	114.677	4.84	126.02	6.68	10.35	6.79333	4.86333	-0.493333	889	87.6333	24.856
2019-01-11 02:15:00	3.76	319.867	4.32667	351.5	6.6	241.13	6.55	35.6833	-0.743333	889	89.1	25.7413
2019-01-11 02:30:00	3.68	123.407	4.24	135.607	6.76667	11.71	7.29667	15.23	-0.936667	889	90.2333	24.468
2019-01-11 02:45:00	3.32	2.98333	3.82	3.27667	6.31667	16.24	6.78667	21.43	-1.20667	889	91.7667	16.468
2019-01-11 03:00:00	3.22667	219.23	3.71333	240.91	5.33667	14.68	5.54667	26.4767	-1.14	889	91.3	16.6
2019-01-11 03:15:00	3.73333	18.0167	4.29	19.7867	6.08	129.22	6.35	10.47	-0.983333	889	90.1933	14.4293
2019-01-11 03:30:00	3.34	10.85	3.84333	11.92	5.83333	356.9	5.93667	1.51667	-0.943333	889	89.6333	10.52
2019-01-11 03:45:00	3.26333	115.133	3.75667	126.513	5.89667	11.2867	6.10667	10.3933	-0.933333	889	89.4667	10.5253
2019-01-11 04:00:00	3.22333	293.02	3.70333	322	5.96333	7.59333	6.3	7.81333	-1.01333	889	89.8667	9.366
2019-01-11 04:15:00	3.39	17.5733	3.9	19.3033	6.38667	5.43667	6.99	9.76333	-1.24	889	91.3667	8.56267
2019-01-11 04:30:00	3.66333	211.12	4.22	232.003	6.18	13.09	6.95667	15.15	-1.08	888.6	90.6333	7.62733
2019-01-11 04:45:00	3.43667	322.99	3.95333	354.933	6.23	17.4133	6.66	17.1767	-1.11	888	90.8333	6.27067
2019-01-11 05:00:00	3.09	110.577	3.55333	121.507	5.89667	17.04	6.02667	10.93	-1.35667	888	92.1	6.888
2019-01-11 05:15:00	3.09667	313.11	3.56	344.067	5.22333	14.7167	5.93333	4.16	-1.51333	888	93.3333	7.332
2019-01-11 05:30:00	3.41667	113.517	3.92667	124.733	5.42333	15.0633	5.48	10.6333	-1.64	888	94.2	8.034
2019-01-11 05:45:00	3.67	215.933	4.22333	237.293	5.49333	17.2767	5.55	14.0667	-1.77	888	94.9667	6.55
2019-01-11 06:00:00	3.56333	219.1	4.09667	240.76	5.93333	15.3967	5.90333	22.9733	-1.86333	888	95.14	5.52867
2019-01-11 06:15:00	3.02333	28.0967	3.48333	30.8767	5.32333	17.4	5.86	29.0167	-1.85667	888	95.3733	3.934
2019-01-11 06:30:00	2.61	227.91	3.00333	250.45	5.04333	16.8933	5.6	28.1233	-2.04333	888	95.8667	3.54467
2019-01-11 06:45:00	2.08	320.88	2.4	352.6	4.06667	21.15	4.52667	18.5767	-2.21	888	96.5067	4.57933
2019-01-11 07:00:00	1.96	128.9	2.25333	141.647	3.57333	26.8767	3.27333	38.21	-2.24333	888	96.6	4.89467
2019-01-11 07:15:00	2.34	320.077	2.69333	351.733	3.67	5.87667	3.69667	8.55667	-2.27667	888	96.5333	4.54133
2019-01-11 07:30:00	2.76	317.17	3.18	348.533	3.65	24.61	3.83	4.19	-2.43	888	97	4.10533
2019-01-11 07:45:00	3.38667	307.647	3.9	338.067	4.36333	1.32667	4.44333	4.86667	-2.51	888	97.6933	3.258
2019-01-11 08:00:00	3.24	320.327	3.73333	352	4.46333	23.9267	4.42333	8.92667	-2.45	888	97.4	3.238
2019-01-11 08:15:00	3.04	301.527	3.50333	331.333	3.97	354.967	4.26667	0.763333	-2.27667	888	96.6	3.35533
2019-01-11 08:30:00	3.25333	312.253	3.75	343.133	3.57667	121.853	4.46	3.74333	-2.07667	888	95.9333	2.70533
2019-01-11 08:45:00	3.55	115.227	4.08333	126.627	4.04333	5.12667	4.554	14.9467	-1.89667	888.733	94.8	2.362
2019-01-11 09:00:00	3.73667	320.107	4.29667	351.767	4.29667	26.6733	4.96333	12.64	-1.93667	889	95.3333	4.744
2019-01-11 09:15:00	3.92	5.01	4.51	5.49667	5.24	3.78333	5.67667	8.94	-1.88333	889.067	95.9933	5.45867
2019-01-11 09:30:00	3.76	220.317	4.33	242.103	5.04	237.983	5.96333	32.8667	-1.59	890	95.1	5.14467
2019-01-11 09:45:00	3.66333	217.747	4.21	239.28	5.06333	246.137	6.17667	8.37333	-1.33667	890	94.0333	5.20267
2019-01-11 10:00:00	4.13	4.04667	4.75667	4.44	6.13	246.35	6.38333	5.12667	-1.09	890	92.7667	3.576
2019-01-11 10:15:00	4.04	311.32	4.65	342.1	5.21333	1.67	5.97	4.07	-0.86	890.733	91.7333	1.58933
2019-01-11 10:30:00	4.10667	323.693	4.72333	355.7	4.74667	26.0633	5.36333	2.85667	-1.12667	891	92.9333	0.902
2019-01-11 10:45:00	4.05333	317.257	4.66	348.633	4.62	0.486667	4.80667	6.63667	-0.743333	891	90.8	0.552667
2019-01-11 11:00:00	3.78	312.283	4.34667	343.167	4.17333	6.81333	4.32667	13.43	-0.336667	891	88.7333	0.202667
2019-01-11 11:15:00	3.77333	200.327	4.34667	220.137	4.13667	146.473	4.38667	21.43	-0.23	891	87.7667	0
2019-01-11 11:30:00	3.70667	211.373	4.26667	232.27	4.19667	146.96	3.97333	19.2233	0.136667	890.6	85.5	0
2019-01-11 11:45:00	3.43667	324.263	3.95333	356.333	3.91067	5.33667	3.76667	31.8133	0.65	890	82.0667	0
2019-01-11 12:00:00	3.19667	113.403	3.68667	124.613	3.7	9.87667	3.52667	23.18	1.15	890	79.8067	0
2019-01-11 12:15:00	2.77333	324.69	3.18667	356.8	3.09333	7.42667	2.75	13.56	1.4	890	78.2267	0
2019-01-11 12:30:00	2.74	313.41	3.16	344.4	3.24667	8.16	2.93	9.76	1.84	890	77.2667	0
2019-01-11 12:45:00	2.76	316.96	3.17333	348.3	3.3	8.52667	2.27	11.5	2.43333	889.267	73.1233	0
2019-01-11 13:00:00	1.74667	321.08	2.01333	352.833	1.75333	5.32	0.59	5.82	2.64667	889	68.5567	0
2019-01-11 13:15:00	1.23	274.577	1.42	301.733	1.43333	105.127	1.66667	114.267	4.16667	889	60.83	0
2019-01-11 13:30:00	2.302	168.95	2.644	185.653	2.68933	177.94	2.624	147.2	5.012	889	59.9287	0
2019-01-11 13:45:00	3.64333	138.353	4.19333	152.033	4.08	160.767	4.08667	175.033	5.52333	889	56.0467	0.939333
2019-01-11 14:00:00	3.89667	148.173	4.48	162.833	4.38667	169.1	4.23333	164.367	5.78333	889	51.3267	2.35133
2019-01-11 14:15:00	4.09333	156.767	4.71	172.267	4.75667	162.867	4.68667	182.4	6.40333	888.267	49.0867	2.59933
2019-01-11 14:30:00	4.00667	160.16	4.61	176	4.77667	172.933	4.94	173.533	6.57	888	49.048	4.26667
2019-01-11 14:45:00	4.24667	141.207	4.89667	155.167	5.2	154.933	5.11333	170.333	6.88667	888	48.49	4.17933
2019-01-11 15:00:00	4.26	157.227	4.91	172.767	5.14	178	5.23333	193.6	7.024	888	48.81	4.352
2019-01-11 15:15:00	4.36	156.532	5.01333	172.013	5.04667	182.967	4.94333	188.667	6.86333	888	49.77	5.05667
2019-01-11 15:30:00	4.18	163.373	4.80667	179.533	4.95333	172.7	4.55	188.267	7.09667	888	49.45	4.71533
2019-01-11 15:45:00	3.74667	150.153	4.30667	165	4.32667	171.033	4.02	197.267	7.28	888	48.6667	4.93467
2019-01-11 16:00:00	3.93333	147.427	4.52	162	4.53333	179.567	4.45333	182.533	7.244	888	49.26	4.10333
2019-01-11 16:15:00	3.65333	128.1	4.21	140.767	4.25333	152.233	4.23	169.367	7.11667	888	48.9267	3.99267
2019-01-11 16:30:00	3.23333	156.613	3.71667	172.1	3.87333	158.367	4.13	174.367	7.16333	888	48.88	3.46067
2019-01-11 16:45:00	2.84667	164.5	3.27667	180.767	3.32333	189.133	3.26	206.233	7.17667	888	49.2773	3.62
2019-01-11 17:00:00	3.07333	178.827	3.54333	196.5	3.91667	225.8	3.9	221.967	7.08333	888	50.38	3.76133
2019-01-11 17:15:00	2.3	160.617	2.65	176.5	2.95333	224.4	2.86667	206.733	6.41333	888	52.4833	6.55133
2019-01-11 17:30:00	2.87333	194.897	3.30333	214.167	3.66	221.533	3.70667	217.4	6.14	888	54.3767	11.4973
2019-01-11 17:45:00	3.46667	154.43	3.99	169.7	4.37333	216.367	4.54667	201.2	5.86	888	56.3733	11.4607
2019-01-11 18:00:00	3.31333	164.557	3.81667	180.833	4.01333	192.567	4.36667	184.2	5.74	888	58.4733	12.3573
2019-01-11 18:15:00	2.71667	164.467	3.12667	180.733	3.28333	171	3.46333	163.987	5.25333	888	63.22	11.8053
2019-01-11 18:30:00	2.654	128.601	3.05733	141.32	3.27	173.52	3.48333	167.52	5.01867	888	65.2293	6.09467
2019-01-11 18:45:00	2.50667	141.933	2.88667	155.967	3.04	173.367	3.22	174.867	4.60667	888	69.1733	4.57933
2019-01-11 19:00:00	2.68	157.773	3.08667	173.367	3.29333	200.767	3.62667	204.133	4.32	888	70.6867	4.26067
2019-01-11 19:15:00	2.736	155.983	3.144	171.407	3.39867	196.927	3.51533	198.82	4.06067	888	70.7993	5.22733
2019-01-11 19:30:00	2.96667	156.067	3.42	171.5	3.58667	176	3.97333	209.133	3.93333	888	71.7633	3.89667
2019-01-11 19:45:00	3.17333	147.25	3.66	161.8	3.72	173.767	4.22	187.6	3.70667	888	74.4667	4.26933
2019-01-11 20:00:00	3.09333	161.317	3.56667	177.267	3.64667	183.7	4.04667	190.667	3.43333	888	75.66	6.82867
2019-01-11 20:15:00	3.56	162.343	4.09667	178.4	4.10667	184.9	4.32667	184.067	3.24	888	75.62	6.58867
2019-01-11 20:30:00	3.19333	163.917	3.67667	180.133	3.64	179.233	3.87333	185.733	3.22667	888	75.9067	7.178
2019-01-11 20:45:00	3.25333	161.287	3.75333	177.233	3.77667	197.833	4.12333	201.767	3.28	888	76	6.176
2019-01-11 21:00:00	3.04	165.833	3.5	182.233	3.70333	207.767	4.13667	222.833	3.20667	888	76.6733	6.52267
2019-01-11 21:15:00	2.98	176.19	3.43	193.6	3.62	199.033	4.21	196.1	3.17333	888.067	76.9453	5.99333
2019-01-11 21:30:00	3.17333	175.583	3.66333	192.933	3.67333	191.767	4.09	199.567	3.15333	888.6	77.4	4.662
2019-01-11 21:45:00	2.63333	170.833	3.03333	187.733	3.20333	203.733	3.54667	210.4	3.00333	888	78.5233	4.31267
2019-01-11 22:00:00	2.55333	155.793	2.93333	171.2	3.21	218.667	3.51333	212	2.88333	888	79.2767	2.56867
2019-01-11 22:15:00	2.41333	179.847	2.78333	197.633	3.01333	200.433	3.04667	207.833	2.78	888	80.2533	1.12667
2019-01-11 22:30:00	2.29333	168.507	2.65	185.167	2.84	200.433	2.96	211.367	2.68	888	81.1333	0.618667
2019-01-11 22:45:00	1.7	157.137	1.95333	172.667	2.19	200.467	2.67333	202	2.59333	888	81.6	0.524667
2019-01-11 23:00:00	2.36667	177.157	2.72667	194.667	2.85	190.267	3.13333	211.333	2.60667	888	81.4667	0.598667
2019-01-11 23:15:00	2.35333	152.763	2.71	167.867	2.86333	187.28	2.84	206.233	2.53667	888	81.7667	0.5
2019-01-11 23:30:00	2.26667	152.043	2.61667	167.067	2.75667	197.333	3.21333	213.167	2.51	888	81.94	1.062
2019-01-11 23:45:00	2.08133	146.675	2.39533	161.18	2.69533	198.313	3.29067	213.867	2.47267	888	82.3867	1.30667
2019-01-12	1.92	152.58	2.21	167.667	2.67	214.367	2.80667	227.3	2.48	888	83	1.336
2019-01-12 00:15:00	1.97	150.15	2.28	165	2.56	216.7	2.85	212.3	2.6	888	83.5	0.719
2019-01-12 00:30:00	1.63667	168.26	1.89333	184.9	2.32	210.6	2.70333	207.867	2.47	888	83.7	0.492667
2019-01-12 00:45:00	1.74	175.22	2.01	192.54	2.462	202.7	2.846	215.62	2.38	888	83.88	0.532667
2019-01-12 01:00:00	2.00667	155.273	2.31667	170.633	2.59667	192.633	2.81667	202.233	2.38	888	83.8667	0
2019-01-12 01:15:00	1.39333	167.26	1.61333	183.8	1.92667	211.2	2.53	210.467	2.39	888	83.8667	0
2019-01-12 01:30:00	1.29333	185.647	1.5	204	1.98	207.8	2.48333	203.467	2.41	888	83.84	0
2019-01-12 01:45:00	1.68333	158.17	1.94667	173.8	2.4	188.367	2.79667	186.233	2.34667	887.267	83.84	0
2019-01-12 02:00:00	1.83	158.17	2.11333	173.8	2.34667	185.967	2.73	192.167	2.32667	887	83.56	0
2019-01-12 02:15:00	1.96	159.871	2.25333	175.68	2.44667	191.567	2.78	209.333	2.39	887	83.2	0
2019-01-12 02:30:00	1.74	156.337	2	171.8	2.44	189.567	2.96	193.32	2.33667	887	83.8	0
2019-01-12 02:45:00	1.04333	180.82	1.2	198.7	1.88667	215.5	2.49	216.167	2.28667	887	84.8	0.085333
2019-01-12 03:00:00	1.33667	175.127	1.54667	192.433	2.32667	228.967	2.69	217.5	2.3	887	85.1333	0.562667
2019-01-12 03:15:00	1.53333	182.73	1.77333	200.8	2.63	222.033	2.90667	227.433	2.20667	887	85.7	0.441333
2019-01-12 03:30:00	1.92667	187.643	2.21333	206.2	2.83	209.433	3.18667	221.7	2.14	887	86.14	0
2019-01-12 03:45:00	1.74667	166.98	2.01	183.5	2.5	204.933	2.86	210.767	2.18333	887	86.34	0
2019-01-12 04:00:00	1.38667	158.793	1.60333	174.5	1.98	204.133	2.51333	212.1	2.19667	887	86.5	0
2019-01-12 04:15:00	0.926667	171.26	1.08	188.2	1.79667	214.167	2.09	222.267	2.07333	887	87.1	0
2019-01-12 04:30:00	0.75	171.26	0.87	188.2	1.48	226.5	1.58	233	2.095	887	87.31	0
2019-01-12 04:45:00	0.38	171.26	0.44	188.2	0.74	242	0.63	252.3	2.18	887	87.8	0
2019-01-12 05:00:00	0.393333	289.35	0.456667	317.967	0.65	317.8	0.67	291.7	2.24333	887	87.56	0
2019-01-12 05:15:00	1.52333	2.92333	1.75333	3.21	2.73333	20.9067	2.71667	18.0333	2.12333	887	87.94	0
2019-01-12 05:30:00	2.33667	215.823	2.69333	237.17	4.17333	8.90667	4.23	19.28	1.81667	887	89.1667	5.10067
2019-01-12 05:45:00	3.09333	18.3933	3.55667	20.21	5.88667	13.1867	6.01333	23.2733	1.66	887	90	11.9633
2019-01-12 06:00:00	3.37333	10.4333	3.87667	11.4633	6.04667	13.1867	6.30667	23.6933	1.54	887	90.4	14.996
2019-01-12 06:15:00	3.50667	8.14667	4.03333	8.95333	6.17667	116.633	5.95	131.373	1.47	887	90.1333	15.7447
2019-01-12 06:30:00	3.66	190.433	4.21333	209.267	6.00333	114.267	5.71667	126.74	1.39667	887	90.0667	16.948
2019-01-12 06:45:00	3.57	312.653	4.10667	343.567	5.65333	7.99	5.65333	5.09	1.27333	887	90.0067	18.3273
2019-01-12 07:00:00	2.98333	110.687	3.44	121.633	5.01333	28.1767	5.34	21.99	1.13333	887.4	90.5	14.2607
2019-01-12 07:15:00	2.27667	261.237	2.62	287.067	4.08667	21.1033	4.12	25.76	0.913333	888	91.3333	15.1493
2019-01-12 07:30:00	2.57667	137.543	2.96667	151.133	4.62667	14.99	4.79333	13.1133	0.846667	888	91.4667	18.5727
2019-01-12 07:45:00	3.51333	227.637	4.05	250.14	6.80667	16.1733	7.00333	22.9567	0.776667	888	91.5933	26.3147
2019-01-12 08:00:00	4.02	12.8233	4.62333	14.0867	7.66	11.86	8.31667	15.9833	0.763333	888	91.0333	27.0067
2019-01-12 08:15:00	5.08	160.973	5.85333	176.89	9.68667	16.2033	10.5333	25.5633	0.716667	888	90.5333	37.952
2019-01-12 08:30:00	5.84	153.453	6.72	168.623	10.8933	19.4167	11.2267	23.9233	0.756667	888	89.9333	45.0333
2019-01-12 08:45:00	6.09	266.99	7.02	293.4	11.23	14.55	11.194	21.51	0.94	887.4	88.4	42.592
2019-01-12 09:00:00	6.67333	283.257	7.67667	311.267	11.8933	19.84	11.8533	25.2533	1.33667	888	86.2333	41.7887
2019-01-12 09:15:00	6.3	18.1	7.24667	19.8867	11.5667	10.9167	11.1267	24.97	2.16	888	83.1333	40.74
2019-01-12 09:30:00	5.68667	179.767	6.54667	197.547	10.6267	8.12333	10.74	24.43	2.79333	888.4	80.6667	44.296
2019-01-12 09:45:00	5.61333	218.67	6.45667	240.297	10.2167	13.2133	10.53	22.7667	3.38333	889	78.0833	40.67
2019-01-12 10:00:00	5.55	4.1	6.392	4.502	10.142	14.134	10.084	22.368	3.724	889	76.386	36.7053
2019-01-12 10:15:00	5.22667	232.507	6.01333	255.5	9.80667	8.30667	9.98333	19.3	4.71	889	72.5333	33.138
2019-01-12 10:30:00	5.28	110.08	6.07333	120.967	9.91333	5.40667	9.97	20.24	5.59	889.4	68.9333	28.1033
2019-01-12 10:45:00	4.79333	280.007	5.51667	307.7	9.05	6.18667	9.49	21.54	6.40333	890	65.3467	27.5067
2019-01-12 11:00:00	5.12667	231.78	5.89667	254.7	9.45	13.4333	9.84333	24.4533	6.77667	890	63.8133	30.8487
2019-01-12 11:15:00	5.37	29.1467	6.18333	32.0233	9.69333	14.32	9.88	27.6	6.82333	890	62.8333	31.15
2019-01-12 11:30:00	5.49667	217.22	6.33	238.697	9.956	14.5267	10.04	20.14	6.84333	890	62.5533	34.0167
2019-01-12 11:45:00	5.81667	199.547	6.69333	219.28	10.3967	5.61333	10.6767	32.24	7.41333	890	59.73	35.6407
2019-01-12 12:00:00	5.81	23.9867	6.69333	26.3467	10.3433	15.9867	10.97	23.2933	7.56667	890	58.3767	35.7847
2019-01-12 12:15:00	5.84	23.3333	6.72	25.6267	10.1533	15.3833	10.54	24.3367	7.57333	890	56.7167	34.0187
2019-01-12 12:30:00	5.78667	111.58	6.66667	122.613	10.3467	28.7967	10.72	26.49	8.05333	890	54.6833	32.956
2019-01-12 12:45:00	5.72	211.937	6.57667	232.893	9.97	13.6033	9.86	25.39	8.23	890	53.03	34.438
2019-01-12 13:00:00	5.88	11.1033	6.77	12.1933	10.3233	30.2633	10.2533	32.1967	8.63	889.6	51.55	32.8027
2019-01-12 13:15:00	6.16667	314.227	7.1	345.3	10.5567	18.38	10.34	22.93	8.75333	889	50.0733	31.444
2019-01-12 13:30:00	5.86667	151.467	6.74667	166.447	10.1433	17.06	9.84667	29.9633	8.97333	889	48.4667	30.1073
2019-01-12 13:45:00	5.81267	282.079	6.686	309.973	9.542	8.936	9.308	15.1253	9.416	889	46.174	28.0907
2019-01-12 14:00:00	5.10667	276.857	5.88333	304.233	8.81333	5.51667	8.44333	20.65	9.87333	889	44.28	24.5487
2019-01-12 14:15:00	4.56333	20.5467	5.24667	22.5767	7.43333	8.52667	7.04667	21.3133	10.33	889	42.51	24.3887
2019-01-12 14:30:00	4.69667	35.96	5.40667	39.51	7.72	26.5467	6.92667	32.5733	10.27	889	42.118	25.8067
2019-01-12 14:45:00	4.56333	222.2	5.25	244.167	7.63667	33.7633	6.23667	32.4967	10.5733	889	41.3667	29.0773
2019-01-12 15:00:00	4.61	212.3	5.30333	233.3	7.84333	21.4167	6.93667	26.2167	10.86	889	40.2933	27.3747
2019-01-12 15:15:00	4.67333	60.8467	5.38333	66.8667	7.98333	14.8467	7.66333	38.69	11.27	889	39.43	28.106
2019-01-12 15:30:00	4.656	214.382	5.358	235.584	8.1	16.856	7.874	29.604	11.442	889	38.546	26.5993
2019-01-12 15:45:00	3.77333	245.163	4.34	269.4	6.75	13.9467	6.52	14.89	9.66	889	41.7733	21.6487
2019-01-12 16:00:00	4.03333	301.757	4.64667	331.6	6.87	24.3333	6.34667	27.2967	10.2933	889	40.2933	18.6253
2019-01-12 16:15:00	3.56333	318.133	4.09667	349.6	6.23667	26.5467	5.77	26.6567	10.4567	889	39.5067	14.4853
2019-01-12 16:30:00	3.57	188.307	4.11	206.933	6.46333	32.8667	5.92333	34.1767	10.4833	889	39.32	13.5967
2019-01-12 16:45:00	3.99333	114.5	4.59333	125.827	7.00333	27.8167	5.986	33.5767	9.94667	889	39.7233	15.538
2019-01-12 17:00:00	3.96667	137.313	4.56667	150.887	6.99667	22.4233	5.59667	30.7767	9.58667	889	39.9967	14.3193
2019-01-12 17:15:00	3.49333	313.893	4.02333	344.933	6.21333	27.9933	5.13	46.11	9.21333	889	40.65	13.8053
2019-01-12 17:30:00	3.50667	124.887	4.04333	137.24	6.32	23.5867	6.00333	27.1033	8.61333	889.4	42.4833	17.7913
2019-01-12 17:45:00	3.95333	65.03	4.54667	71.46	7.23333	24.4167	6.77067	31.6467	8.10667	890	44.4767	18.2727
2019-01-12 18:00:00	3.31333	70.5833	3.81333	77.56	6.12	21.1833	5.76667	34.12	7.74667	890	45.91	16.9113
2019-01-12 18:15:00	2.70667	242.703	3.11333	266.7	5.15667	19.0033	4.32	32.0233	7.21333	890	48.1367	17.5
2019-01-12 18:30:00	1.94667	128.71	2.24667	141.433	3.65667	46.33	2.68667	52.7367	7.09333	890	48.0367	18.0347
2019-01-12 18:45:00	1.64333	160.78	1.89667	176.667	3.03667	65.2133	2.48	65.4667	7.04267	890	47.5433	17.1567
2019-01-12 19:00:00	2.07667	212.52	2.39667	233.533	3.46333	77.2133	3.19333	83.34	6.86667	890	48.5233	14.4653
2019-01-12 19:15:00	2.16	90.8167	2.48333	99.8	3.42667	86.5167	3.25333	92.8867	6.80733	890	48.9933	12.1473
2019-01-12 19:30:00	1.27333	30.67	1.46333	33.7	2.33333	64.2967	2.36667	70.7533	6.57667	890	49.7	8.57467
2019-01-12 19:45:00	1.94333	321.753	2.24333	353.567	3.66	18.4	3.70667	45.71	5.94	890	52.96	9.836
2019-01-12 20:00:00	2.62333	313.867	3.02333	344.9	5.02667	9.56667	5.02667	25.9633	5.4	890	56.4933	8.77867
2019-01-12 20:15:00	2.77	273	3.19	300	5.45	19.36	5.67	26.07	4.93	890	59.96	5.904
2019-01-12 20:30:00	1.66467	309.565	1.91667	340.173	3.11267	18.108	3.262	21.026	4.694	890	63.0813	2.02933
2019-01-12 20:45:00	1.93933	29.1913	2.24	32.0733	2.29333	13.5813	2.30267	36.04	5.20333	890	61.9793	1.168
2019-01-12 21:00:00	1.77	13.1733	2.04	14.4667	2.07333	17.4967	1.91	51.6633	5.43667	890	60.2133	0.772667
2019-01-12 21:15:00	1.72667	317.53	1.99	348.933	2.06	15.8033	1.36667	48.5967	5.39667	890.733	59.1067	0.528
2019-01-12 21:30:00	1.04667	307.343	1.20333	337.733	1.63333	12.4033	1.47333	87.8767	5.15667	891	58.5333	0.037333
2019-01-12 21:45:00	1.12667	209.99	1.29333	230.75	1.58	16.3067	0.846667	18.87	5.15333	891	58.5867	0
2019-01-12 22:00:00	1.35333	0.05	1.56	0.05	1.36667	2.5	0.6	77.3967	4.82667	891	61.26	0
2019-01-12 22:15:00	0.41	323.24	0.473333	355.2	0.106667	81.62	0.266667	84.98	5.03333	891	59.9033	0
2019-01-12 22:30:00	0.49	207.127	0.566667	227.6	0.946667	177.533	1.16667	184.467	5.01333	891	60.0567	0
2019-01-12 22:45:00	0.723333	160.679	0.830667	176.56	1.38267	167.413	1.72667	182.12	4.70933	891	62.6887	0
2019-01-12 23:00:00	0.27	160.038	0.31	175.86	0.453333	167.6	0.613333	198.433	4.56	891	62.4033	0
2019-01-12 23:15:00	1.13333	186.937	1.30333	205.417	0.983333	11.1533	0.33	155.14	4.31	891	63.9233	0
2019-01-12 23:30:00	1.6	212.477	1.83667	233.483	2.17667	21.0133	1.61	29.6	3.76333	891	66.2567	0
2019-01-12 23:45:00	2.16333	309.86	2.49	340.5	3.29667	10.9633	3.04667	16.9233	3.62333	891	66.332	0
2019-01-13	2.69667	106.72	3.10333	117.267	3.55	9.11667	3.1	14.2433	3.57	891	66.5533	0.015333
2019-01-13 00:15:00	3.18667	315.98	3.67333	347.233	3.68333	4.83333	3.21333	11.4133	3.42667	891	67.2533	0.526
2019-01-13 00:30:00	3.53333	319.813	4.06667	351.433	3.95667	240.88	3.58	8.74	3.34667	891	67.8533	2.74267
2019-01-13 00:45:00	3.26	307.827	3.75333	338.267	4.23333	5.45	4.74667	13.38	2.56333	891	72.32	7.61733
2019-01-13 01:00:00	3.10667	287.747	3.57333	316.2	5.31333	3.66333	5.82	13.8333	1.85667	891	76.2933	13.046
2019-01-13 01:15:00	3.69333	167.5	4.25333	184.067	6.58	3.31667	6.82	18.8133	1.37667	891	79.3533	18.7687
2019-01-13 01:30:00	4.46	218.28	5.14	239.867	6.97333	234.39	7.40667	11.74	1.52333	891	79.744	19.41
2019-01-13 01:45:00	4.85333	320.017	5.58333	351.667	7.36667	21.1833	7.76333	14.9533	1.81333	891	78.5933	23.1233
2019-01-13 02:00:00	4.8	109.457	5.53	120.28	6.72667	28.0433	6.99667	17.74	1.79333	890.6	78.84	26.046
2019-01-13 02:15:00	4.80667	126.253	5.53667	138.727	6.43667	223.01	6.61667	27.3433	1.69667	890	79.4933	24.3853
2019-01-13 02:30:00	3.95333	115.253	4.55	126.64	6.20333	12.3833	6.47	23.65	1.42333	890	81.1333	17.9473
2019-01-13 02:45:00	3.90467	6.124	4.496	6.72867	5.50267	21.406	5.688	21.1367	1.24667	890	82.0333	17.1833
2019-01-13 03:00:00	4.07	3.04	4.68	3.34333	5.86	35.6767	5.63333	7.62333	0.973333	890	83.4333	17.7273
2019-01-13 03:15:00	4.22	120.573	4.86	132.5	5.90333	6.56667	6.54333	13.59	0.696667	890	85.3	17.0207
2019-01-13 03:30:00	3.9	130.587	4.5	143.493	6.23667	8.59333	6.54333	12.3233	0.223333	890	87.9667	18.8007
2019-01-13 03:45:00	3.87667	9.25667	4.46333	10.17	7.21667	8.42667	7.21667	4.25333	-0.23	890	90.3333	22.6807
2019-01-13 04:00:00	4.09	221.997	4.71667	243.95	7.64333	6.48	7.79667	6.13333	-0.403333	890	91	23.7387
2019-01-13 04:15:00	4.32	211.237	4.97333	232.127	7.78667	15.7467	7.85333	10.6233	-0.42	889.933	91.2267	23.5113
2019-01-13 04:30:00	4.34667	22.9967	5.00667	25.26	7.91333	17.22	7.97333	19.8967	-0.513333	889	91.6	24.834
2019-01-13 04:45:00	4.47333	0.523333	5.15333	0.57	7.74	13.59	8.12667	17.5467	-0.566667	889	91.9333	27.8367
2019-01-13 05:00:00	4.59333	216.537	5.28	237.95	7.39333	238.777	7.57333	19.5267	-0.446667	889	91.2	24.8373
2019-01-13 05:15:00	3.95333	103.76	4.55	114.02	6.43667	120.587	6.79	27.52	-0.526667	889	91.1067	24.7147
2019-01-13 05:30:00	4.18	308.28	4.81	338.767	5.84333	331.167	5.95667	11.34	-0.553333	889	91.5333	27.4327
2019-01-13 05:45:00	3.55	197.023	4.08	216.5	5.57333	12.2967	6.03	23.2267	-0.67	889	91.9	26.164
2019-01-13 06:00:00	3.29	216.61	3.78	238.033	5.48667	8.07667	6.01	12.5067	-1.05	889	93.3667	23.854
2019-01-13 06:15:00	4.07333	125.07	4.69667	137.44	6.36333	6.30667	6.96	12.8633	-1.24667	889	94.7	20.1593
2019-01-13 06:30:00	4.46	33.63	5.13667	36.9533	6.91	4.93333	7.42667	11.47	-1.1	889	94.1667	19.4953
2019-01-13 06:45:00	4.18333	162.44	4.81	178.5	7.26667	1.28333	7.4	7.47	-1.06667	889	93.4	18.9667
2019-01-13 07:00:00	4.41667	77.38	5.07667	85.0333	7.73333	2.19	7.77333	3.90333	-1.27333	889	94.2	16.22
2019-01-13 07:15:00	4.56667	320.573	5.26333	352.267	7.06	8.62667	7.51333	7.46	-1.31	889	94.9067	12.9193
2019-01-13 07:30:00	4.11333	317.847	4.73	349.267	6.73333	6.66667	6.99333	14.42	-1.45667	889	95.5333	11.5233
2019-01-13 07:45:00	4.45333	140.087	5.13333	153.933	7.12	3.55333	7.07333	3.19333	-1.55667	889	96.0333	13.5313
2019-01-13 08:00:00	4.44	247.893	5.10667	272.4	6.7	238.82	6.68667	4.23333	-1.48333	889	95.5667	14.9947
2019-01-13 08:15:00	4.48667	316.2	5.17333	347.467	6.45667	4.66667	6.48667	120.553	-1.5	889	95.5333	18.8333
2019-01-13 08:30:00	4.80667	108.367	5.54	119.08	6.93	6.74	6.92	131.407	-1.56	889	96.1333	24.0727
2019-01-13 08:45:00	5.23	107.593	6.02667	118.233	7.61667	9.36667	8.04333	12.41	-1.63667	889.733	97.0333	25.8493
2019-01-13 09:00:00	5.37667	162.32	6.18667	178.367	8.60333	8.13333	8.77667	17.75	-1.37667	890	96.9	26.5453
2019-01-13 09:15:00	5.49333	25.3333	6.31667	27.8367	8.72667	1.65667	8.94667	17.5667	-1	890.067	95.7	26.5353
2019-01-13 09:30:00	5.81333	37.7667	6.68333	41.5033	8.72667	7.70333	8.76667	20.4	-0.753333	891	94.3	24.3047
2019-01-13 09:45:00	5.54333	199.39	6.37667	219.113	8	8.14	8.14667	14.68	-0.433333	891	92.6667	22.1973
2019-01-13 10:00:00	5.27667	4.06333	6.07667	4.46	7.34	10.4933	7.71333	6.96	-0.253333	891	90.7333	21.6087
2019-01-13 10:15:00	5.09333	93.9033	5.85667	103.18	7.11667	133.593	7.42333	8.07667	-0.16	891	90.2667	23.6213
2019-01-13 10:30:00	5.24	302.97	6.03	332.933	7.63	119	7.89	5.61	0.166667	891	88.9333	26.058
2019-01-13 10:45:00	5.18667	33.7367	5.96333	37.0667	8	120.507	8.03	121.9	-0.613333	891	91.6333	28.4467
2019-01-13 11:00:00	5.05333	207.417	5.81	227.927	7.85333	119.613	7.91667	124.153	-0.586667	891	91.8333	25.7
2019-01-13 11:15:00	4.86	51.8667	5.60333	56.9933	7.62333	28.26	7.71667	9.40333	-0.193333	891	90.4667	26.7307
2019-01-13 11:30:00	4.67333	185.147	5.37667	203.46	7.63667	6.52667	7.70333	7.03667	0.04	891	88.8	24.9627
2019-01-13 11:45:00	4.61	134.25	5.30667	147.513	7.17	2.54333	7.57333	10.89	0.343333	891	87.2333	22.0213
2019-01-13 12:00:00	4.70333	316.87	5.41333	348.2	7.21667	236.437	7.31333	16.5833	0.456667	891	86.1667	19.1233
2019-01-13 12:15:00	4.55333	316.603	5.24667	347.913	6.98667	5.47667	7.15333	80.3433	0.656667	891	85.3333	16.4113
2019-01-13 12:30:00	4.31333	108.193	4.97333	118.887	6.76	0.416667	6.62667	10.0967	0.863333	890.6	84.3333	12.63
2019-01-13 12:45:00	4.52667	3.19667	5.20667	3.50667	6.25	3.86333	6.28	4.99	0.866667	890	84.3933	10.1627
2019-01-13 13:00:00	4.47333	209.757	5.15333	230.493	5.85667	0.15	5.68667	5.01667	0.913333	890	84.1	7.60467
2019-01-13 13:15:00	4.51333	95.58	5.19	105.027	5.78	4.04	5.78667	16.2967	0.913333	889.933	83.6	5.18133
2019-01-13 13:30:00	4.52	94.4	5.19667	103.733	5.54	233.9	5.37333	6.52333	0.98	889	83.36	3.56867
2019-01-13 13:45:00	4.57333	17.0267	5.26333	18.7133	5.64	5.02333	5.46667	2.3	1.00333	889	83.2	2.32933
2019-01-13 14:00:00	4.41333	213.213	5.07667	234.293	5.14667	5.62333	5.18667	9.63333	1.08333	889	82.3333	1.94467
2019-01-13 14:15:00	4.184	130.979	4.818	143.929	5.16	3.46	4.94733	2.95467	1.324	889	81.6933	1.60733
2019-01-13 14:30:00	4.13333	114.107	4.75333	125.387	5.12333	3.65667	4.75667	4.70667	1.39667	888.6	81.8	1.51533
2019-01-13 14:45:00	3.97333	108.583	4.57	119.313	4.71	140.113	4.66667	127.253	1.41667	888	81.4	0.991333
2019-01-13 15:00:00	3.65333	114.243	4.20333	125.54	4.39667	124.187	4.62	129.847	1.56333	888	80.4667	0.899333
2019-01-13 15:15:00	3.33667	240.637	3.83333	264.433	4.17333	6.1	4.47	19.6533	1.76	888	79.1067	0.084
2019-01-13 15:30:00	3.19	243.303	3.67333	267.367	3.76	8.85333	4.02333	22.2	1.90667	888	78.2	0
2019-01-13 15:45:00	3.01333	216.38	3.46667	237.773	3.44	355.967	3.50667	18.18	2.02667	888	77.484	0
2019-01-13 16:00:00	2.84	217.467	3.26667	238.973	3.39333	355.233	3.36	37.2133	2.16	888	77.1	0
2019-01-13 16:15:00	2.62	308.797	3.02	339.34	3.04333	354.433	2.73	5.87667	2.35	888	76.6433	0
2019-01-13 16:30:00	2.27333	311.017	2.61333	341.767	2.61	148.22	2.24333	9.75667	2.36333	888	76.6033	0
2019-01-13 16:45:00	2.03333	314.317	2.34	345.4	2.51333	119.08	1.88667	19.3233	2.37333	888	76.2567	0
2019-01-13 17:00:00	1.6	307.643	1.84	338.067	1.72	356.9	1.06667	236.057	2.4	888	76.0167	0
2019-01-13 17:15:00	1.26667	313.493	1.46333	344.5	1.61	2.12333	0.526667	260.867	2.44333	888.067	76.2093	0
2019-01-13 17:30:00	1.03333	318.54	1.19	350.033	0.81	188.383	0.973333	237.733	2.47667	889	76.24	0
2019-01-13 17:45:00	0.834	216.721	0.956	238.153	0.170667	274.733	0.642	190.487	2.406	888.933	76.7667	0
2019-01-13 18:00:00	0.993333	217.29	1.14667	238.78	0.26	96.6067	0.58	177.54	2.25	888.4	78.1467	0
2019-01-13 18:15:00	1.72667	322.533	1.98667	354.433	1.55333	238.907	0.066667	142.857	2.09667	889	79.2267	0
2019-01-13 18:30:00	2.1	317.792	2.42	349.22	2.33333	5.54667	1.04	47.9367	2.01	889	79.744	0
2019-01-13 18:45:00	2.32	1.19	2.67	1.29667	2.82	5.66333	2.13667	27.4233	1.94333	888.267	79.9133	0
2019-01-13 19:00:00	3	0.05	3.45667	0.05	3.50667	1.95	2.81667	16.6567	1.93	888	79.916	0
2019-01-13 19:15:00	3.18333	213.643	3.67	234.767	3.70333	7.15333	3.51	21.5033	1.94667	888.733	79.6713	0.107333
2019-01-13 19:30:00	2.99667	209.937	3.45	230.7	3.73667	240.053	3.99	23.19	1.94667	889	80.0967	0.947333
2019-01-13 19:45:00	3.09333	108.813	3.56	119.567	4.21667	5.86	4.34	11.9533	1.89	889	80.7333	2.46533
2019-01-13 20:00:00	3.05333	112.527	3.51333	123.653	4.25667	240.313	4.26	15.6333	1.84333	889	81.0667	3.922
2019-01-13 20:15:00	3.34667	111.57	3.84667	122.607	4.90333	12.8467	5.06667	7.98667	1.77333	889	81.3067	5.41067
2019-01-13 20:30:00	3.2	130.477	3.68	143.38	5.31	17.48	5.43333	14.1	1.71333	889	81.6667	6.62467
2019-01-13 20:45:00	3.26667	207.61	3.76333	228.147	5.73	1.97667	6.02667	11.4667	1.64667	889	82	8.88867
2019-01-13 21:00:00	3.38667	200.217	3.90333	220.013	5.83	7.80333	6.00667	17.8867	1.63333	889	82.3333	10.1453
2019-01-13 21:15:00	4.02333	15.0367	4.62333	16.5167	7.08667	19.4233	7.11667	19.5067	1.56	889	83.3333	16.3133
2019-01-13 21:30:00	4.33	204.197	4.99	224.39	7.81333	19.99	7.83	19.3467	1.47333	889	84.2667	21.194
2019-01-13 21:45:00	4.55333	130.207	5.23667	143.073	7.19	12.41	7.19333	21.66	1.46667	889	84.5667	21.008
2019-01-13 22:00:00	4.54667	316.533	5.23	347.833	6.10333	231.737	6.12667	15.56	1.57333	889.4	83.9667	20.734
2019-01-13 22:15:00	3.57667	58.2867	4.11333	64.0467	5.99	240.76	6.12333	21.3867	1.55333	889.333	84.2	23.5033
2019-01-13 22:30:00	3.95	229.3	4.54	251.967	6.78333	11.8	7.01667	25.6333	1.52667	890	84.64	31.0107
2019-01-13 22:45:00	4.74667	286.137	5.46333	314.433	8.26667	121.293	8.47667	18.65	1.47	889.267	84.6333	36.744
2019-01-13 23:00:00	5.04	105.697	5.80333	116.147	8.44	116.267	8.69667	7.18333	1.45667	889	84.06	37.376
2019-01-13 23:15:00	4.97667	215.623	5.72333	236.95	8.69	1.99333	8.28333	5.89	1.5	889	83.2	40.3653
2019-01-13 23:30:00	5.05	21.8033	5.80333	23.9567	8.13667	6.48667	7.99667	239.337	1.54	889	82.64	44.9287
2019-01-13 23:45:00	5.58667	312.04	6.42667	342.9	8.79	8.36	8.86333	9.37667	1.53333	889	82.2333	45.576
2019-01-14	5.85333	258.84	6.73333	284.433	9.65667	16.0333	9.78333	19.1367	1.54667	889	80.8333	47.8567
2019-01-14 00:15:00	5.866	107.293	6.74267	117.9	9.5	13.3567	9.3	23.9433	1.54667	889	80.05	48.2607
2019-01-14 00:30:00	6.00333	119.987	6.90667	131.847	10.0867	3.13667	10.1133	18.8833	1.58667	889	79.27	47.7527
2019-01-14 00:45:00	5.25333	42.25	6.05333	46.4167	9.66	8.04667	9.8	13.5	1.66333	889	78.0067	45.2107
2019-01-14 01:00:00	5.13333	200.33	5.91333	220.137	9.53333	9.50667	9.53333	20.62	1.67	889	77.76	44.8567
2019-01-14 01:15:00	5.31333	103.743	6.12	114	9.53	13.6367	9.44667	19.4	1.63667	889	77.952	45.7253
2019-01-14 01:30:00	5.91333	306.19	6.80667	336.467	10.27	8.31667	10.2867	23.02	1.64333	889	77.6333	40.5067
2019-01-14 01:45:00	5.48	68.8667	6.30333	75.6733	9.72333	4.54	9.63667	12.8867	1.64667	889	77.5593	35.368
2019-01-14 02:00:00	5.33333	113.24	6.14333	124.433	9.32333	11.3533	9.41667	18.24	1.62667	889	77.8367	35.9133
2019-01-14 02:15:00	4.66667	201.87	5.37	221.837	7.65	239.267	7.99333	15.4233	1.65667	889	77.9333	35.13
2019-01-14 02:30:00	3.97333	219.65	4.57	241.37	5.97667	9.39333	5.93333	21.1433	1.67	889	78.04	38.0893
2019-01-14 02:45:00	4.44	303.333	5.11	333.333	7.12667	233.133	6.91667	5.08667	1.64667	889	78.3467	36.7867
2019-01-14 03:00:00	3.94	99.7867	4.54333	109.653	6.28	226.067	5.91667	3.83333	1.67333	889	78.152	37.2
2019-01-14 03:15:00	4.10333	105.54	4.72333	115.973	6.49667	338.567	6.11667	341.733	1.64667	889	78.3447	39.5853
2019-01-14 03:30:00	4.30333	115.18	4.95	126.567	6.76333	349.5	6.47667	113.653	1.64667	889	78.43	40.8147
2019-01-14 03:45:00	4.58667	304.43	5.27667	334.533	7.36	344.9	6.86667	120.267	1.62333	888.267	78.49	39.3987
2019-01-14 04:00:00	4.74667	132.317	5.46333	145.407	7.66667	140.593	7.32667	126.1	1.68333	888	77.8967	40.9927
2019-01-14 04:15:00	4.89467	231.423	5.63867	254.309	7.65333	243.316	7.50667	21.3573	1.716	888	77.538	41.99
2019-01-14 04:30:00	4.84667	206.56	5.58	226.987	7.41	10.5633	7.16	18.7233	1.73667	888	77.3533	43.3
2019-01-14 04:45:00	5.05	198.24	5.80667	217.85	8.76333	11.21	9.03667	11.7533	1.66	888	78.11	43.7873
2019-01-14 05:00:00	5.45667	37.8733	6.27333	41.6233	9.39667	17.65	9.51	22.28	1.68667	888	77.638	44.4507
2019-01-14 05:15:00	5.34	105.827	6.14	116.287	8.16	118.973	7.96667	25.0733	1.76333	888	76.9033	43.7587
2019-01-14 05:30:00	4.84667	96.7467	5.57333	106.313	7.79333	326.233	7.58667	45.6867	1.77	888	76.5567	42.4073
2019-01-14 05:45:00	4.72333	12.16	5.44333	13.36	7.81667	202.777	7.99	131	1.79	888	76.2373	42.4247
2019-01-14 06:00:00	4.83667	204.62	5.56333	224.847	7.81667	238.777	7.59667	121.613	1.81	888	75.8267	41.4193
2019-01-14 06:15:00	5.14333	221.747	5.92333	243.673	8.79667	229.547	8.38	3.38667	1.87	888	75.06	42.0513
2019-01-14 06:30:00	4.67667	195.727	5.37667	215.073	8.09	2.01333	7.74	5.04	1.91	888	74.5733	40.2467
2019-01-14 06:45:00	4.31667	127.007	4.97	139.56	7.41667	339.833	7.18667	355.533	1.84	888	75.4487	39.1987
2019-01-14 07:00:00	4.49	120.12	5.16333	132	7.33	138.647	7.61333	132.373	1.83333	888	75.406	42.6627
2019-01-14 07:15:00	5.64333	225.11	6.5	247.367	9.65333	12.29	9.71333	36.74	1.91667	888	74.7367	44.274
2019-01-14 07:30:00	6.05	264.303	6.96	290.433	10.3067	11.2833	10.4867	22.4333	1.97667	888	74.09	42.4887
2019-01-14 07:45:00	5.41667	208.483	6.23	229.09	9.01667	8.56333	9.27333	14.36	2.10667	888	72.7533	40.9553
2019-01-14 08:00:00	5.91667	30.59	6.81	33.61	10.17	6.94333	10.1467	13.5333	2.13333	888	72.568	47.4873
2019-01-14 08:15:00	5.97333	150.457	6.88	165.333	10.72	12.09	10.7033	19.2667	2.13333	888.067	72.3233	48.506
2019-01-14 08:30:00	5.84	73.07	6.71333	80.2933	10.82	15.6767	10.8367	20.4333	2.18	889	71.6967	48.034
2019-01-14 08:45:00	5.77333	293.627	6.65333	322.667	10.7167	12.22	10.8367	18.1033	2.29333	889	70.7933	49.0253
2019-01-14 09:00:00	5.85333	274.04	6.73333	301.133	10.13	17.1333	10.2833	10.61	2.34	889	70.3467	47.118
2019-01-14 09:15:00	5.80667	32.5267	6.674	35.7433	10.4667	11.55	10.43	22.25	2.45	889	69.4833	46.1127
2019-01-14 09:30:00	5.84	8.47333	6.71667	9.31	10.296	14.71	10.2567	18.6367	2.49	889	69.1833	47.0633
2019-01-14 09:45:00	5.38	230.32	6.19667	253.1	10.2267	9.80667	10.4133	12.3367	2.53667	889.067	68.8287	45.756
2019-01-14 10:00:00	5.72	249.127	6.58333	273.767	10.6667	8.97333	10.72	20.1033	2.61	890	68.27	48.82
2019-01-14 10:15:00	6.05667	212.15	6.96667	233.12	10.5833	10.9467	10.3633	13.94	2.78667	890	66.5	45.5533
2019-01-14 10:30:00	5.84333	41.1167	6.73333	45.18	9.94333	12.3733	9.93	10.9533	2.86667	890	66.16	44.5293
2019-01-14 10:45:00	5.73333	204.913	6.59333	225.183	10.2033	3.98667	9.99667	14.5967	2.93667	890	65.57	47.3393
2019-01-14 11:00:00	5.86667	216.327	6.74667	237.717	10.03	16.4867	9.48333	13.2833	2.91	890	66.2367	48.3587
2019-01-14 11:15:00	5.87333	71.5233	6.76	78.5933	10.4833	18.21	10.2467	12.1767	2.99333	890	65.76	46.1387
2019-01-14 11:30:00	6.08	178.657	7	196.327	10.1767	4.28333	10.2333	13.91	3.06	890	64.9467	44.994
2019-01-14 11:45:00	5.96333	231.08	6.85133	253.933	10.54	8.77	10.38	17.5033	3.15333	890	64.6967	46.5627
2019-01-14 12:00:00	6.19667	233.14	7.13	256.2	10.7133	16.41	10.364	16.69	3.15333	890	64.8633	49.3087
2019-01-14 12:15:00	6.36	43.7433	7.32	48.07	11.1067	11.61	10.7533	10.24	3.15733	890	65.6333	49.4953
2019-01-14 12:30:00	6.22	206.13	7.15333	226.517	10.6933	10.9767	10.5333	10.7067	3.2	889.6	65.792	50.9207
2019-01-14 12:45:00	6.24	310.953	7.18	341.7	10.2033	36.5167	9.84	8.14333	3.33667	889	64.6767	49.4913
2019-01-14 13:00:00	6.34667	133.773	7.3	147	11.21	12.5233	10.7467	14.99	3.52333	889	64.17	49.328
2019-01-14 13:15:00	6.13333	217.07	7.05333	238.527	11.19	9.08333	10.9067	20.08	3.85333	889	63.304	47.876
2019-01-14 13:30:00	5.94	185.877	6.83333	204.26	11.0433	12.1967	10.6467	16.7533	3.964	889	62.8867	43.7927
2019-01-14 13:45:00	5.53	96.9167	6.36	106.493	10.23	7.16	9.79333	12.1833	3.95933	889	62.7813	43.92
2019-01-14 14:00:00	5.67667	206.717	6.53333	227.16	10.154	13.4933	9.86	18.1833	3.97667	889	62.4667	46.0393
2019-01-14 14:15:00	5.48	17.6667	6.30933	19.4033	9.66	10.02	9.45333	12.59	4.09667	889	61.5467	44.5067
2019-01-14 14:30:00	5.37333	217.487	6.18667	238.99	8.92	9.22667	8.84	19.7033	4.11667	889	60.7	46.9027
2019-01-14 14:45:00	5.49733	171.766	6.33133	188.745	9.38533	11.0973	9.43467	17.3073	4.24667	889	59.7973	47.0367
2019-01-14 15:00:00	5.64333	282.86	6.49667	310.833	9.94333	14.8567	10.2267	23.6033	4.44667	889	58.36	50.206
2019-01-14 15:15:00	5.89533	299.399	6.784	329.007	10.7253	8.79467	10.83	25.458	4.58333	888.267	57.3093	50.6987
2019-01-14 15:30:00	5.888	122.99	6.774	135.147	10.884	9.81	10.68	21.3833	4.70333	888.4	55.9267	50.6
2019-01-14 15:45:00	6.19333	184.18	7.12667	202.397	11.5567	14.1033	11.0967	22	4.77	889	54.47	52.5293
2019-01-14 16:00:00	6.42	231.5	7.39333	254.397	11.61	14.5767	11.2633	25.34	4.79667	889	53.6633	54.3993
2019-01-14 16:15:00	6.19333	17.73	7.13	19.4833	11.66	10.8633	11.57	22.1133	4.78067	889	53.8167	53.924
2019-01-14 16:30:00	6.11333	41.7767	7.03	45.91	11.48	15.4967	11.5433	21.74	4.77667	889	53.8167	54.3347
2019-01-14 16:45:00	6.4	202.77	7.36667	222.823	11.86	10.6567	11.9787	26.88	4.78667	889	52.7633	56.118
2019-01-14 17:00:00	6.69333	217.15	7.70667	238.623	12.3533	16.4767	12.1933	22.5533	4.78667	889	52.57	56.652
2019-01-14 17:15:00	6.86333	247.377	7.90333	271.833	12.5933	17.57	12.67	23.69	4.83667	889	51.6333	55.3407
2019-01-14 17:30:00	6.75667	69.1833	7.77	76.02	12.44	22.8167	12.63	31.5833	4.85667	889	51.38	55.152
2019-01-14 17:45:00	6.61333	10.3633	7.60333	11.39	11.88	9.94333	12.18	28.09	4.91333	889	50.5567	52.2187
2019-01-14 18:00:00	6.28	187.21	7.23	205.723	11.3333	20.9233	11.5733	33.05	4.94667	889	50.3367	49.1993
2019-01-14 18:15:00	5.78667	112.337	6.66	123.437	10.54	9.89667	10.8267	31.37	4.93333	889.733	50.12	48.4947
2019-01-14 18:30:00	5.72	210.857	6.58667	231.703	10.5133	14.37	10.7333	32.47	4.86667	890	50.2667	45.9273
2019-01-14 18:45:00	5.64333	58.5533	6.49333	64.34	10.47	12.95	10.41	34.3633	4.81333	890	50.2267	43.4253
2019-01-14 19:00:00	5.67	76.5533	6.52667	84.12	10.6433	26.7367	10.9833	37.41	4.88667	890	49.4	43.9967
2019-01-14 19:15:00	6.25667	217.683	7.20333	239.217	11.43	25.05	12.05	34.93	4.82	890	49.7967	45.6393
2019-01-14 19:30:00	6.42333	212.657	7.39667	233.683	11.4967	18.6233	12.2967	42.8233	4.98	890.4	48.7033	42.3733
2019-01-14 19:45:00	6.23667	290	7.17333	318.667	11.1267	28.8433	11.6433	37.98	5.10333	891	47.8647	44.2073
2019-01-14 20:00:00	5.91	276.52	6.8	303.867	10.6733	19.6633	11.434	32.22	5.07	891	48.2967	48.6173
2019-01-14 20:15:00	5.75667	221.647	6.63333	243.563	10.8433	18.4867	11.1133	21.7433	4.90333	891	49.46	48.8693
2019-01-14 20:30:00	5.55667	153.887	6.39333	169.097	10.49	15.8133	10.7667	25.03	4.89	891.4	49.38	47.3847
2019-01-14 20:45:00	6.04	45.1467	6.96	49.6067	10.8767	16.22	10.9067	24.5	4.91333	892	49.3133	42.6507
2019-01-14 21:00:00	5.77333	208.913	6.65333	229.567	10.6233	21.8467	10.5267	26.64	4.98	892	48.7867	44.508
2019-01-14 21:15:00	6.17667	238.507	7.11	262.1	11.1333	12.5933	11.3	22.04	5.04933	892	48.2193	43.1787
2019-01-14 21:30:00	6.06333	118.06	6.98333	129.74	11.16	8.18667	11.2	29.5133	5.04	892	48.206	48.4027
2019-01-14 21:45:00	6.4	54.7567	7.35667	60.17	11.9067	22.3333	11.96	22.1633	5.00333	892	48.6033	51.3313
2019-01-14 22:00:00	6.60667	186.203	7.59667	204.617	12.08	14.52	12.2933	22.8433	5.05	892	47.87	48.9093
2019-01-14 22:15:00	6.09	73.44	7	80.7	11.1967	15.4067	12.0713	23.61	5.01067	892	47.7467	42.7273
2019-01-14 22:30:00	5.64333	72.0667	6.48667	79.1933	10.6233	13.5133	11.7233	22.0367	5.00667	892	47.268	38.5293
2019-01-14 22:45:00	5.41	157.55	6.22	173.133	10.29	18.64	11.4167	28.5567	5.02667	892.733	46.3533	38.128
2019-01-14 23:00:00	5.35667	172.783	6.16667	189.867	10.05	18.28	10.9967	27.9567	5.08667	893	45.4	35.7573
2019-01-14 23:15:00	5.16	107.787	5.93667	118.447	9.48667	32.7633	10.3567	36.18	5.07333	893	44.7907	35.7047
2019-01-14 23:30:00	5.13333	226.68	5.90333	249.1	9.67333	24.9167	10.4033	25.7067	5	893	44.1467	38.6213
2019-01-14 23:45:00	5.35667	280.04	6.17	307.733	9.92333	21.9133	10.7333	30.1567	5.06	893.067	42.6433	35.9387
2019-01-15	5.05	164.54	5.81	180.8	9.60333	30.88	10.3333	30.4967	5.04667	894	41.6967	30.7493
2019-01-15 00:15:00	4.612	178.519	5.30467	196.173	8.78733	2.68333	9.31067	26.4987	4.94333	894	41.728	29.9073
2019-01-15 00:30:00	4.6	229.747	5.30333	252.467	8.36333	15.31	8.53333	28.6067	5.05	894	39.3733	32.374
2019-01-15 00:45:00	4.67333	202.913	5.37667	222.967	8.4	22.94	8.62333	29.27	5.07667	894	38.09	35.0353
2019-01-15 01:00:00	4.80667	213.28	5.53667	234.367	8.62667	22.2267	8.78333	30.2767	5.034	894	37.11	36.8533
2019-01-15 01:15:00	5.04333	267.303	5.81	293.733	9.11	20.2667	9.38667	32.1267	5	894	36.3067	43.9047
2019-01-15 01:30:00	5.42667	227.85	6.242	250.387	9.65067	19.668	10.018	30.674	4.988	894	35.376	44.532
2019-01-15 01:45:00	5.54	34.39	6.37333	37.7933	9.76667	42.3867	10.04	39.94	4.96333	893.267	34.32	49.2693
2019-01-15 02:00:00	6.26667	120.11	7.20667	131.987	11.2067	29.4667	11.4133	30.2133	4.87667	893	34.4067	53.02
2019-01-15 02:15:00	6.99667	82.24	8.04667	90.3733	12.4667	18.06	12.6567	29.12	4.70667	893	35.0367	51.0233
2019-01-15 02:30:00	6.85	80.1933	7.88	88.12	12.5267	9.76	12.7433	21.3067	4.50667	893	36.4367	52.1353
2019-01-15 02:45:00	6.96667	146.82	8.01333	161.333	12.72	22.6967	12.7033	27.15	4.41933	893	36.038	51.8633
2019-01-15 03:00:00	6.58	106.473	7.56667	117	12.1867	21.8367	12.3967	29.7767	4.36333	893	36.4833	51.042
2019-01-15 03:15:00	6.492	88.7653	7.468	97.5347	11.9073	16.2787	12.204	24.944	4.29333	893	36.4127	48.1393
2019-01-15 03:30:00	6.36	285.6	7.32	313.833	11.6633	17.4067	11.92	25.7067	4.26	893	36.3167	50.4087
2019-01-15 03:45:00	6.78	7.56	7.79333	8.30333	12.14	14.1067	12.5	31.11	4.24933	893	36.43	52.07
2019-01-15 04:00:00	7.06667	9.8	8.13333	10.7633	12.8333	10.1467	12.9933	23.4767	4.2	893	36.6567	52.724
2019-01-15 04:15:00	7.19667	281.253	8.28333	309.067	12.9033	24.18	13.3967	29.3433	4.13667	893	36.7467	52.2033
2019-01-15 04:30:00	7.19667	108.373	8.28333	119.087	12.61	26.4667	13.1833	35.3767	4.17	893	36	52.0733
2019-01-15 04:45:00	7.04667	301.82	8.11	331.667	12.7027	15.4833	13.0133	23.3467	4.06067	893	37.1433	50.5753
2019-01-15 05:00:00	6.90667	288.833	7.95667	317.4	12.0467	19.31	12.8933	32.1	4.05	893	36.9567	50.5873
2019-01-15 05:15:00	6.71333	212.937	7.72667	233.987	11.6433	26.5233	12.5033	37.4867	3.97333	893	37.2233	50.6193
2019-01-15 05:30:00	7.05333	224.03	8.11333	246.187	12.3767	25.3567	12.7167	25.02	3.94	892.6	37.2767	51.0527
2019-01-15 05:45:00	6.29333	182.287	7.24667	200.317	11.37	12.0933	11.84	32.23	3.81667	892	37.95	50.6733
2019-01-15 06:00:00	6.2	219.667	7.13333	241.383	11.19	25.9067	11.84	36.59	3.73	892	38.2833	50.274
2019-01-15 06:15:00	6.28333	19.7167	7.22667	21.6533	11.33	15.77	11.96	17.51	3.65	892.067	38.8567	50.158
2019-01-15 06:30:00	6.17	6.85667	7.1	7.52667	11.0767	15.75	11.6	21.4033	3.59	893	39.034	50.604
2019-01-15 06:45:00	6.77667	116.06	7.79667	127.533	11.9767	17.0833	11.9067	19.6567	3.59	893	38.9833	52.6553
2019-01-15 07:00:00	7.43	319.627	8.55	351.233	13.0567	19.6567	13.1133	26.1767	3.55	893	39.6167	50.7687
2019-01-15 07:15:00	7.794	253.767	8.97333	278.853	13.882	17.2693	13.998	21.3427	3.44133	893	40.53	55.058
2019-01-15 07:30:00	8.11	216.643	9.33667	238.067	14.81	5.77333	14.66	15.95	3.33	893	41.6267	53.8873
2019-01-15 07:45:00	8.05333	115.457	9.26333	126.87	14.1707	11.9433	14.17	32.4467	3.27	893	41.2067	53.6287
2019-01-15 08:00:00	7.36	28.7633	8.47	31.61	12.8733	24.07	13.1967	32.0267	3.25667	893	41.3133	50.7607
2019-01-15 08:15:00	6.77333	26.85	7.79	29.4933	12.0467	18.89	12.1733	22.5333	3.15	893.733	41.89	52.2953
2019-01-15 08:30:00	6.92	158.277	7.97	173.927	12.2867	26.9167	12.82	32.8	3.05667	894	42.9033	49.7927
2019-01-15 08:45:00	7.02	18.3667	8.08333	20.1867	12.33	22.3833	12.892	35.1333	2.98667	894	43.4767	50.79
2019-01-15 09:00:00	7.32667	18.72	8.42333	20.5733	12.6833	6.83667	13.0333	25.44	2.94667	894.4	43.8567	51.7847
2019-01-15 09:15:00	6.86667	191.41	7.90333	210.34	11.9467	16.71	12.5767	43.2633	2.88	895	44.5173	49.064
2019-01-15 09:30:00	7.28	54.55	8.37667	59.94	12.6067	0.77	12.55	27.0633	2.84	895	45.1267	49.5247
2019-01-15 09:45:00	7.74	78.9	8.9	86.7	13.39	0.9	12.97	21.89	2.83	895	45.45	50.834
2019-01-15 10:00:00	7.74	78.9	8.9	86.7	13.39	0.9	12.97	21.89	2.83	895	45.45	52.412
2019-01-15 10:15:00	7.74	78.9	8.9	86.7	13.39	0.9	12.97	21.89	2.83	895	45.45	52.0113
2019-01-15 10:30:00	7.74	78.9	8.9	86.7	13.39	0.9	12.97	21.89	2.83	895	45.45	50.8127
2019-01-15 10:45:00	7.74	78.9	8.9	86.7	13.39	0.9	12.97	21.89	2.83	895	45.45	49.472
2019-01-15 11:00:00	7.74	78.9	8.9	86.7	13.39	0.9	12.97	21.89	2.83	895	45.45	49.7133
2019-01-15 11:15:00	7.74	78.9	8.9	86.7	13.39	0.9	12.97	21.89	2.83	895	45.45	50.968
2019-01-15 11:30:00	7.74	78.9	8.9	86.7	13.39	0.9	12.97	21.89	2.83	895	45.45	48.6027
2019-01-15 11:45:00	7.74	78.9	8.9	86.7	13.39	0.9	12.97	21.89	2.83	895	45.45	50.5753
2019-01-15 12:00:00	7.74	78.9	8.9	86.7	13.39	0.9	12.97	21.89	2.83	895	45.45	48.912
2019-01-15 12:15:00	7.74	78.9	8.9	86.7	13.39	0.9	12.97	21.89	2.83	895	45.45	49.57
2019-01-15 12:30:00	7.74	78.9	8.9	86.7	13.39	0.9	12.97	21.89	2.83	895	45.45	48.2813
2019-01-15 12:45:00	7.74	78.9	8.9	86.7	13.39	0.9	12.97	21.89	2.83	895	45.45	50.5427
2019-01-15 13:00:00	7.74	78.9	8.9	86.7	13.39	0.9	12.97	21.89	2.83	895	45.45	43.986
2019-01-15 13:15:00	7.74	78.9	8.9	86.7	13.39	0.9	12.97	21.89	2.83	895	45.45	43.9627
2019-01-15 13:30:00	7.74	78.9	8.9	86.7	13.39	0.9	12.97	21.89	2.83	895	45.45	43.368
2019-01-15 13:45:00	7.74	78.9	8.9	86.7	13.39	0.9	12.97	21.89	2.83	895	45.45	38.7407
2019-01-15 14:00:00	7.74	78.9	8.9	86.7	13.39	0.9	12.97	21.89	2.83	895	45.45	42.892
2019-01-15 14:15:00	7.74	78.9	8.9	86.7	13.39	0.9	12.97	21.89	2.83	895	45.45	40.9933
2019-01-15 14:30:00	7.74	78.9	8.9	86.7	13.39	0.9	12.97	21.89	2.83	895	45.45	43.6313
2019-01-15 14:45:00	7.74	78.9	8.9	86.7	13.39	0.9	12.97	21.89	2.83	895	45.45	44.92
2019-01-15 15:00:00	7.74	78.9	8.9	86.7	13.39	0.9	12.97	21.89	2.83	895	45.45	43.0827
2019-01-15 15:15:00	7.74	78.9	8.9	86.7	13.39	0.9	12.97	21.89	2.83	895	45.45	43.5887
2019-01-15 15:30:00	7.74	78.9	8.9	86.7	13.39	0.9	12.97	21.89	2.83	895	45.45	41.3813
2019-01-15 15:45:00	7.74	78.9	8.9	86.7	13.39	0.9	12.97	21.89	2.83	895	45.45	38.9133
2019-01-15 16:00:00	7.74	78.9	8.9	86.7	13.39	0.9	12.97	21.89	2.83	895	45.45	41.3833
2019-01-15 16:15:00	7.74	78.9	8.9	86.7	13.39	0.9	12.97	21.89	2.83	895	45.45	34.2273
2019-01-15 16:30:00	7.74	78.9	8.9	86.7	13.39	0.9	12.97	21.89	2.83	895	45.45	32.6233
2019-01-15 16:45:00	7.74	78.9	8.9	86.7	13.39	0.9	12.97	21.89	2.83	895	45.45	30.0387
2019-01-15 17:00:00	7.74	78.9	8.9	86.7	13.39	0.9	12.97	21.89	2.83	895	45.45	26.2447
2019-01-15 17:15:00	4.07667	9.80333	4.68667	10.77	7.49	19.3433	6.98	32.69	3.69667	894	55.4767	24.4327
2019-01-15 17:30:00	4.03667	40.77	4.64	44.7967	7.36333	8.84333	6.92	27.7033	3.22333	894	57.2233	20.5573
2019-01-15 17:45:00	3.68333	133.243	4.23667	146.42	6.73333	16.8733	6.44667	36.14	2.65	894	59.2367	17.2287
2019-01-15 18:00:00	3.31667	143.35	3.81667	157.527	5.96	26.5533	5.52	27.6933	2.35	893.6	60.3033	15.432
2019-01-15 18:15:00	2.98667	160.243	3.43667	176.083	5.57	9.54667	4.85	22.3233	1.98333	893.667	61.45	14.9487
2019-01-15 18:30:00	2.46	7.06333	2.83	7.76333	4.73667	23.2667	3.83667	32.67	1.61667	893	63.0433	15.9253
2019-01-15 18:45:00	2.45333	179.097	2.82	196.8	4.54667	31.672	3.81667	29.1733	1.32	893.733	64.49	19.438
2019-01-15 19:00:00	2.38	307.95	2.74	338.4	4.46667	28.9867	3.89667	34.22	1.09333	894	65.8033	20.6313
2019-01-15 19:15:00	2.72333	304.21	3.13333	334.3	5.12333	29.9367	3.69333	36.5633	0.863333	894	67.2147	22.2273
2019-01-15 19:30:00	3.15667	120.583	3.63333	132.513	5.76333	40.61	4.40667	26.5767	0.89	894	67.2933	17.9993
2019-01-15 19:45:00	2.96333	311.13	3.40333	341.9	5.78333	13.99	5.81333	27.2633	0.543333	894	69.19	17.398
2019-01-15 20:00:00	2.95667	114.73	3.39667	126.073	5.55667	15.61	5.716	28.2033	0.31	894	70.47	19.602
2019-01-15 20:15:00	2.95333	128.043	3.4	140.707	5.27	16.2967	5.17333	42.1633	0.476667	894	70.9307	16.9913
2019-01-15 20:30:00	2.88667	299.97	3.32	329.633	5.29667	32.8233	5.20667	25.35	0.27	894	72.7467	14.8993
2019-01-15 20:45:00	3.19	134.253	3.67	147.527	5.07	10.0067	5.15667	22.25	0.27	894	74.82	13.3687
2019-01-15 21:00:00	3.03667	213.767	3.49	234.9	5.33667	8.54667	5.62333	24.91	0.143333	894	76.3067	11.7353
2019-01-15 21:15:00	2.75	319.51	3.16	351.1	4.7	123.473	4.98333	12.7333	-0.103333	894	77.96	8.14
2019-01-15 21:30:00	2.61667	299.057	3.01333	328.633	4.66	125.293	4.71	12.4733	-0.143333	894	77.98	5.146
2019-01-15 21:45:00	2.48333	11.8833	2.86333	13.0567	4.49667	228.517	4.34667	6.87333	-0.186667	894	77.786	3.224
2019-01-15 22:00:00	2.73	202.583	3.13667	222.617	4.52333	30.2033	4.2	36.62	-0.26	894	77.9767	2.29
2019-01-15 22:15:00	2.74	316.95	3.16	348.3	3.79	342.7	3.45	15.52	0.2	894	75.77	1.415
2019-01-15 22:30:00	2.51333	317.657	2.90333	349.067	3.91667	9.47333	3.70667	10.38	0.26	894	75.4367	1.404
2019-01-15 22:45:00	2.49667	6.99333	2.87333	7.67333	3.90333	239.62	3.89333	1.29333	0.163333	894	76.0727	2.26933
2019-01-15 23:00:00	2.59667	214.06	2.98667	235.227	3.98333	7.49333	4.27333	4.18667	-0.103333	894	77.7967	3.52667
2019-01-15 23:15:00	2.42	223.683	2.78333	245.8	4.45	124.933	4.82	22.4133	-0.3	894	79.34	4.478
2019-01-15 23:30:00	2.55333	24.6033	2.94333	27.0333	4.52333	124.853	4.84667	24.64	-0.486667	894	80.22	5.62067
2019-01-15 23:45:00	2.71333	313.253	3.12667	344.233	4.95333	5.54667	5.19667	7.05667	-0.456667	894	80.4667	5.776
2019-01-16	2.93786	320.32	3.38357	351.993	4.78	6.69143	4.90357	3.44714	-0.346429	894	79.9693	8.53643
2019-01-16 00:15:00	2.96667	309.98	3.41333	340.633	5.23333	345.333	5.38	11.9033	-0.36	893.267	80.08	11.552
2019-01-16 00:30:00	3.25333	122.88	3.74	135.033	5.40667	117.62	5.58667	10.61	-0.433333	893	80.5	12.3547
2019-01-16 00:45:00	3.25333	0.796667	3.75333	0.876667	5.08	8.21333	5.22667	12.73	-0.456667	893	80.3033	10.51
2019-01-16 01:00:00	3.44	108.31	3.96667	119.017	4.99333	236.493	5.05333	11.63	-0.47	893	80.1433	10.2407
2019-01-16 01:15:00	3.41333	205.1	3.92333	225.38	5.36	356.86	5.20667	17.27	-0.636667	892.933	80.8667	10.0233
2019-01-16 01:30:00	2.98	32.5067	3.43	35.72	5.15333	339.567	5.02	24.2767	-0.736667	892	81.0667	8.536
2019-01-16 01:45:00	3.06	216.893	3.52333	238.333	5.12667	118.767	5.23333	12.44	-0.846667	892	80.9333	6.45267
2019-01-16 02:00:00	2.874	5.248	3.306	5.76	4.786	168.794	4.956	12.034	-0.938	892	80.98	4.39067
2019-01-16 02:15:00	3.11333	94.4267	3.59	103.767	4.37667	235.85	4.52667	7.41333	-1.00667	892	81.2667	1.66333
2019-01-16 02:30:00	3.51333	94	4.03667	103.293	4.32333	1.21667	4.6	7.68667	-0.6	892	79.7333	0.291333
2019-01-16 02:45:00	2.97	212.867	3.41333	233.913	3.74667	8.70667	3.99667	11.8733	-0.426667	892	78.6367	0
2019-01-16 03:00:00	2.13	8.91333	2.44667	9.78	3.02667	14.84	3.11667	11.3067	-0.393333	892	78.05	0
2019-01-16 03:15:00	1.35667	307.95	1.56	338.4	1.95	3.55333	2.02667	2.67333	-0.34	892	77.5547	0
2019-01-16 03:30:00	1.42333	119.223	1.63333	131.007	2.02333	10.7533	2.02	0.24	-0.36	892	77.74	0
2019-01-16 03:45:00	1.48	123.4	1.70667	135.62	2.02	8.12333	1.78333	0.25	-0.43	892	78.6433	0.053333
2019-01-16 04:00:00	1.64	322.96	1.88667	354.9	2.34667	9.91	1.84333	0.27	-0.483333	892	79.2167	0.164
2019-01-16 04:15:00	1.65	2.02333	1.90667	2.22	2.28667	11.1433	1.62333	0.24	-0.56	892	79.4633	0.301333
2019-01-16 04:30:00	1.63667	217.037	1.88	238.5	2.03333	7.63667	1.49667	0.24	-0.613333	891.6	79.7233	0.562
2019-01-16 04:45:00	1.62667	320.015	1.86667	351.653	2.07333	5.59333	0.71	240.223	-0.716667	891	80.4	0.356
2019-01-16 05:00:00	1.766	217.624	2.029	239.135	2.219	3.299	0.747	6.008	-0.773	891	80.78	0.298
2019-01-16 05:15:00	1.90667	223.377	2.19333	245.463	2.48667	8.43333	1.40667	21.49	-0.773333	891	80.9	0.125333
2019-01-16 05:30:00	2.29333	221.503	2.63333	243.397	2.92667	5.02667	2.14	16.8833	-0.78	891	80.3	0.176667
2019-01-16 05:45:00	1.61333	319.393	1.85667	350.967	1.83	5.38667	0.386667	13.92	-0.746667	890.267	79.91	0.205333
2019-01-16 06:00:00	0.82	311.313	0.95	342.1	0.576667	241.047	0.093333	65.5733	-0.686667	890	79.086	0.136
2019-01-16 06:15:00	0.546667	301.91	0.64	331.767	0	249.903	0.873333	144.407	-0.8	890	79.0233	0.060667
2019-01-16 06:30:00	0.426667	297.663	0.5	327.1	0.026667	173.97	0.58	150.3	-0.88	890	79.3633	0.122667
2019-01-16 06:45:00	0.166667	292.38	0.196667	321.3	0.32	235.293	1.31333	186.133	-0.736667	890	78.3633	0.53
2019-01-16 07:00:00	0.446667	205.387	0.523333	225.7	0.886667	199.667	2.06	192.2	-0.51	890	77.282	0.270667
2019-01-16 07:15:00	0.403333	161.896	0.47	177.907	0.8	150.093	1.34333	192.733	-0.59	890	77.5967	0.397333
2019-01-16 07:30:00	0.043333	161.98	0.05	178	0.086667	150	1.03	191.8	-0.87	890	78.7433	0.660667
2019-01-16 07:45:00	0.253333	161.974	0.296667	177.993	0.49	150.153	1.20333	203.3	-1.02667	890	80.0833	0.544667
2019-01-16 08:00:00	0.413333	161.89	0.476667	177.9	0.813333	150.3	1.32	197.9	-0.816667	890	79.18	0.4
2019-01-16 08:15:00	0.093333	161.956	0.106667	177.973	0.166667	150.3	1.24667	209.313	-0.94	890	79.9	0.816667
2019-01-16 08:30:00	0.2	161.98	0.233333	178	0.393333	189.567	1.29333	204.033	-0.8	890	79.04	1.35267
2019-01-16 08:45:00	0.953333	147.487	1.09667	162.067	1.54333	175.933	1.93667	191.293	-0.56	890.733	78.1033	1.108
2019-01-16 09:00:00	1.82267	157.785	2.09933	173.387	2.666	179.96	2.71933	192.48	-0.610667	891	79.2287	1.82867
2019-01-16 09:15:00	1.00333	158.957	1.15333	174.667	1.9	192.1	2.24333	206.533	-0.45	891	79.3267	2.23067
2019-01-16 09:30:00	1.01	147.97	1.16667	162.6	1.62	193.9	2.09667	223.667	-0.403333	891	79.9933	3.02
2019-01-16 09:45:00	1.48	156.07	1.71333	171.5	2.05	201.8	2.71	218.4	-0.533333	891.733	81.9	3.518
2019-01-16 10:00:00	1.61333	158.737	1.86	174.433	2.13	216.733	3.29	230.4	-0.54	892	82.2333	5.38133
2019-01-16 10:15:00	1.82667	155.137	2.10333	170.473	2.11667	196.933	2.71	209.1	-0.153333	892	80.4967	4.37533
2019-01-16 10:30:00	1.52667	181.857	1.75667	199.833	2.29667	210.533	3.18333	215.633	0.126667	892	79.5967	4.212
2019-01-16 10:45:00	1.60333	170.357	1.85667	187.2	2.13	200.167	2.36	226.5	1.23	892	74.6033	3.23667
2019-01-16 11:00:00	1.67	145.183	1.93	159.533	1.79	177.367	1.74	218.7	1.20333	892.4	74.6767	3.26
2019-01-16 11:15:00	2.45333	159.87	2.82333	175.667	2.61333	194.267	2.75333	212.033	1.16667	893	74.8	3.75133
2019-01-16 11:30:00	2.25333	161.69	2.59	177.667	2.4	197.2	2.30667	199.367	1.31333	893	74.72	4.38067
2019-01-16 11:45:00	3.22	141.383	3.70333	155.367	3.51	180.467	3.44667	188.7	1.58	892.933	73.55	3.58333
2019-01-16 12:00:00	3.09333	142.243	3.57	156.3	3.45	171.8	3.56	189.567	2.07333	892	71.4233	4.198
2019-01-16 12:15:00	2.68	164.833	3.08667	181.133	3.2	238.333	3.28333	212.867	2.84333	892	69.736	4.36333
2019-01-16 12:30:00	3.22667	160.413	3.71333	176.267	3.94667	211.533	4.06333	206.133	2.87667	892	70.7	3.912
2019-01-16 12:45:00	2.67333	168.503	3.07333	185.167	3.33333	247.567	3.4	236.033	2.85667	892	71.7433	3.108
2019-01-16 13:00:00	2.51333	161.17	2.89333	177.1	3.02667	232.567	3.03333	222.167	2.85	891.6	72.25	1.642
2019-01-16 13:15:00	2.4	145.67	2.76333	160.067	2.70667	196.067	2.74	214	2.89667	891	72.5267	1.05533
2019-01-16 13:30:00	2.31333	176.49	2.65667	193.933	2.84	213.4	3.00667	264.4	3.27	891	71.64	0.650667
2019-01-16 13:45:00	2.87333	163.38	3.31333	179.533	3.28333	203	3.25333	220.1	3.66	890.933	70.2733	0.595333
2019-01-16 14:00:00	2.51333	167.073	2.89333	183.6	2.99667	208.667	3.02	225.767	3.72667	890	70.1467	0.99
2019-01-16 14:15:00	3.11333	135.777	3.58333	149.2	3.64	189.3	3.32333	177.467	3.69	890	69.8533	1.228
2019-01-16 14:30:00	2.45333	129.897	2.82333	142.733	3.02	204.367	2.76333	212.333	3.76333	890	69.68	0.423333
2019-01-16 14:45:00	2.53	152.98	2.91	168.1	3.12	175.1	3.38	174.3	3.79	890	69.84	0.2
2019-01-16 15:00:00	2.64	161.527	3.03333	177.5	3.03	182.667	2.97333	186.667	3.93333	890	69.25	0
2019-01-16 15:15:00	1.31	105.927	1.52	116.4	1.71667	197.433	1.55	176.633	3.79333	890	70.068	0
2019-01-16 15:30:00	1.43	160.047	1.64667	175.867	1.97	193.833	1.67667	210.633	3.756	890	70.136	0
2019-01-16 15:45:00	1.28667	149.483	1.49	164.267	1.68333	170.2	1.59333	166.333	3.72667	890	70.3467	0
2019-01-16 16:00:00	0.76	164.897	0.883333	181.2	1.13	201.333	0.906667	185	3.62667	890	70.6533	0
2019-01-16 16:15:00	0.07	234.333	0.09	257.5	0.076667	173.9	0.133333	203.933	3.67	890	70.1367	0
2019-01-16 16:30:00	0.216667	94.26	0.25	103.58	0.403333	46.6467	0.433333	53.42	3.75667	890	69.998	0
2019-01-16 16:45:00	0.593333	306.887	0.68	337.233	1.03	344.067	0.483333	111.66	3.85333	890.067	70.1187	0
2019-01-16 17:00:00	0.166667	296.46	0.193333	325.767	0.296667	323.8	0.103333	334.46	3.82667	891	70.6267	0
2019-01-16 17:15:00	0.153333	309.74	0.176667	340.367	0.276667	10.8933	0.226667	334.4	3.63	891	71.36	0
2019-01-16 17:30:00	0.293333	310.22	0.343333	340.9	0.576667	3.30667	0.9	334.44	3.53667	891	72.1933	0
2019-01-16 17:45:00	0.611333	318.01	0.702667	349.453	1.18067	24.924	0.962667	66.2127	3.46933	891	72.0633	0
2019-01-16 18:00:00	1.03667	307.67	1.20333	338.1	2.03333	12.1267	2.06333	15.74	3.38	891	72.4033	0
2019-01-16 18:15:00	1.19333	313.99	1.37667	345.033	2.33667	12.32	2.30333	8.43	3.23667	891	73.184	0
2019-01-16 18:30:00	1.32	307.49	1.53	337.9	2.61	11.48	2.65	13.23	3.17	891	73.24	0
2019-01-16 18:45:00	1.88667	174.577	2.17667	191.84	3.63333	10.02	3.7	18.32	2.98667	891	74.7933	1.64067
2019-01-16 19:00:00	1.9	6.66333	2.19667	7.32	3.35333	16.5667	3.36	10.6333	2.96	891	74.676	0.939333
2019-01-16 19:15:00	1.59667	107.397	1.84667	118.02	2.98333	10.8	2.78333	7.23	2.9	891	74.6627	0.844
2019-01-16 19:30:00	1.45667	281.737	1.67333	309.6	2.77	242.293	2.71	243.27	2.87333	891	74.58	0.768667
2019-01-16 19:45:00	1.45333	302.363	1.66667	332.267	2.84333	7.97667	2.87333	16.99	2.84	891.733	74.0007	0.397333
2019-01-16 20:00:00	1.21333	96.4367	1.39333	105.967	2.37	17.1433	2.27333	23.15	2.78	892	74.3367	0
2019-01-16 20:15:00	1.89333	8.01667	2.19	8.80333	3.77	9.06667	3.74667	15.6933	2.66	892	74.4167	1.28933
2019-01-16 20:30:00	2.47333	196.703	2.85	216.15	4.74333	15.6667	4.56	9.11333	2.62	892	74.67	3.36533
2019-01-16 20:45:00	2.72667	320.667	3.13667	352.367	4.2	6.29333	4.16667	12.1067	2.67667	892	74.6433	3.534
2019-01-16 21:00:00	2.67333	104.293	3.07667	114.6	4.08667	0.84	4.02667	11.5533	2.72333	892	74.45	2.644
2019-01-16 21:15:00	2.28	13.4933	2.63	14.8167	4.06	1.95667	3.76333	17.66	2.61667	892	74.9367	3.668
2019-01-16 21:30:00	2.78667	5.04667	3.21667	5.53667	4.28	12.1033	4.24333	12.08	2.57	892	75.102	5.14
2019-01-16 21:45:00	2.69333	101.593	3.09333	111.633	4.50333	8.45	4.54	10.1333	2.48	892	75.312	5.55067
2019-01-16 22:00:00	2.396	128.334	2.762	141.024	4.318	10.788	4.354	16.554	2.316	892	75.696	5.13333
2019-01-16 22:15:00	2.55	2.19	2.93	2.41	4	3.96	4.2	16.23	2.39	892.2	75.05	5.098
2019-01-16 22:30:00	2.46	9.65	2.83	10.595	4.235	12.275	4.515	19.245	2.285	893	75.765	6.645
2019-01-16 22:45:00	2.61267	21.7707	3.00533	23.9187	4.20467	261.184	4.41267	21.1847	2.188	893	75.9513	5.93733
2019-01-16 23:00:00	2.54333	8.04	2.93333	8.83333	4.13	117.767	4.26333	13.99	2.20667	893	75.5767	6.37467
2019-01-16 23:15:00	2.22	310.593	2.56667	341.3	4.12667	8.44667	4.34667	17.8133	2.02	893	76.5333	5.22267
2019-01-16 23:30:00	2.04667	311.44	2.36667	342.233	3.8	5.78667	4	16.8533	1.87333	893	77.4933	4.906
2019-01-16 23:45:00	2.22933	116.574	2.572	128.097	3.948	8.40467	3.83533	14.1467	1.72733	893	78.1387	6.10467
2019-01-17	2.355	116.057	2.71786	127.532	4.28571	14.7486	4.33429	13.5593	1.65571	893	78.3579	7.27143
2019-01-17 00:15:00	2.78	219.303	3.19667	240.997	4.63333	7.59	4.53667	5.60667	1.53	893	79.2127	8.56267
2019-01-17 00:30:00	2.77333	17.45	3.19	19.17	4.54667	238.37	4.51667	9.66	1.36333	893	79.63	9.152
2019-01-17 00:45:00	2.58333	29.98	2.97	32.9367	4.54	222.533	4.64	5.55333	1.00667	892.933	81.1667	8.28133
2019-01-17 01:00:00	2.61	6.39333	3.01	7.02333	4.28667	4.42667	4.4	11.5733	0.933333	892	81.6333	8.696
2019-01-17 01:15:00	2.81333	100.557	3.24333	110.5	4.68667	31.3833	5.21667	5.43	0.773333	892	82.3733	8.2
2019-01-17 01:30:00	2.86667	113.99	3.29667	125.26	5.1	7.36333	5.50333	15.3567	0.46	892	84.2	10.6727
2019-01-17 01:45:00	3.12	178.533	3.58667	196.19	5.59	12.57	5.87667	13.9	0.113333	892	86.1933	9.93533
2019-01-17 02:00:00	2.98667	206.14	3.43333	226.523	5.33	13.9167	5.62333	22.2667	0.026667	892	86.5667	7.18333
2019-01-17 02:15:00	3.10667	315.927	3.57667	347.167	4.47667	13.8467	4.98933	25.3867	0.133333	892	86	6.32067
2019-01-17 02:30:00	3.39333	115.247	3.91	126.633	5.29667	14.2067	5.28667	14.8667	0.033333	892	85.8667	5.94667
2019-01-17 02:45:00	3.094	68.9453	3.56133	75.7553	5.536	8.896	5.45933	13.9927	-0.292667	892	87	5.51667
2019-01-17 03:00:00	3.12333	89.7667	3.59	98.64	5.06333	7.00333	5.24	15.52	-0.24	891.6	86.8	4.768
2019-01-17 03:15:00	3.07333	6.28	3.53667	6.89667	5.11333	9.18	4.94667	8.11333	-0.383333	891	87.4667	5.474
2019-01-17 03:30:00	3.13333	27.96	3.61	30.7233	5.38	17.8733	5.44	16.4467	-0.736667	891	89.2667	6.068
2019-01-17 03:45:00	2.996	22.056	3.454	24.232	5.11133	13.8313	5.18133	22.7013	-0.956	891	90.2933	7.03467
2019-01-17 04:00:00	3.27333	20.2667	3.76333	22.2567	4.99	21.5233	5.25333	18.0833	-0.93	891	90.2333	5.658
2019-01-17 04:15:00	3.45333	301.913	3.97667	331.767	5.23333	14.5	5.56333	24.1067	-1.09	891	90.6	5.70533
2019-01-17 04:30:00	3.42	299.24	3.93667	328.833	4.73333	16.3533	5.07667	19.3533	-0.976667	891	89.8667	4.01067
2019-01-17 04:45:00	3.4	311.067	3.92	341.833	4.57	12.6867	4.58667	15.59	-0.91	891	89.2667	3.29067
2019-01-17 05:00:00	3.476	226.534	3.996	248.94	4.74	18.612	4.664	19.594	-0.966	890.6	89.42	2.636
2019-01-17 05:15:00	3.36	209.69	3.87	230.417	4.65	4.53	4.5	20.5567	-1.20667	890	90.3667	2.47867
2019-01-17 05:30:00	3.4	0.45	3.92333	0.49	4.83	10.8233	4.70667	20.17	-1.28	890	90.8333	2.792
2019-01-17 05:45:00	3.21333	312.037	3.69667	342.9	4.44667	10.3	4.45667	17.3067	-1.5	890	91.7933	1.606
2019-01-17 06:00:00	3.45333	316.35	3.97	347.633	4.22667	4.17333	4.24333	16.4667	-1.44	890	91.3667	0.835333
2019-01-17 06:15:00	3.24667	103.587	3.74	113.833	3.99333	12.5733	4.12	22.7733	-1.53333	890	91.36	0.526
2019-01-17 06:30:00	3.3	313.04	3.80667	344	3.9	9.46	4.17333	24.56	-1.55333	890	91.5333	0.802
2019-01-17 06:45:00	3.63333	318.197	4.18333	349.667	4.15667	240.56	4.39667	17.37	-1.56667	890	91.7267	0.638667
2019-01-17 07:00:00	3.44667	103.523	3.97	113.753	4.09667	239.56	3.97667	21.7033	-1.72667	890	92.5	0.024667
2019-01-17 07:15:00	3.09333	212.437	3.56333	233.447	4.03667	20.6467	3.82667	14.2533	-1.70333	890	91.5667	0.080667
2019-01-17 07:30:00	2.98	8.46333	3.43	9.29333	4.16333	13.5067	4.14667	20.068	-1.70333	890	91.5	0.05
2019-01-17 07:45:00	3.21667	214.617	3.71	235.837	4.02	13.11	3.85933	15.7	-1.47333	890	90.5333	0.192667
2019-01-17 08:00:00	3.27	211.697	3.77	232.637	4.00667	16.0433	3.93667	19.58	-1.38	890	90.5333	0.004
2019-01-17 08:15:00	3.16333	107.373	3.64667	117.987	3.81333	241.64	3.75	20.2467	-1.30667	890.733	89.8333	0
2019-01-17 08:30:00	3.08333	321.993	3.54667	353.833	3.69333	4.16	3.67667	21.12	-1.29333	891	89.5667	0
2019-01-17 08:45:00	3.26333	115.067	3.75667	126.44	3.63667	9.27667	3.28	16.4433	-1.26	891	88.8333	0
2019-01-17 09:00:00	3.27	321.473	3.76333	353.267	3.81	17.7633	3.29333	21.0833	-1.32	891	88.9667	0
2019-01-17 09:15:00	3.17	116.883	3.65333	128.44	3.75667	10.54	3.38333	38.32	-1.39	891	89.8333	0
2019-01-17 09:30:00	3.37	114.577	3.87333	125.907	3.85	7.64	3.51	21.14	-1.33667	891	89.1	0
2019-01-17 09:45:00	3.32	210.53	3.83	231.35	3.74	0.15	3.34333	0.34	-1.33667	891.067	88.8	0
2019-01-17 10:00:00	3.1	211.623	3.57	232.55	3.46	6.21	2.86333	0.6	-1.21667	892	88.0667	0
2019-01-17 10:15:00	2.68667	323.207	3.09333	355.167	3.04333	251.287	1.43333	147.027	-1.05667	892	87.7333	0
2019-01-17 10:30:00	2.58	322.18	2.96667	354.033	2.81667	251.287	1.22667	350.567	-0.956667	892	87.64	0
2019-01-17 10:45:00	2.26667	318.953	2.61	350.5	2.64	14.5433	1.04667	347.867	-0.72	892	87.1	0
2019-01-17 11:00:00	2.22667	324.173	2.56333	356.233	2.44	13.57	0.066667	329	-0.64	892	87.3	0
2019-01-17 11:15:00	2.06667	106.17	2.38333	116.667	2.10667	29.01	0.126667	280.6	-0.583333	892.733	87.2333	0
2019-01-17 11:30:00	1.91333	112.81	2.20333	123.967	2.00667	7.75	0.033333	221	-0.523333	893	86.4333	0.035
2019-01-17 11:45:00	1.54667	320.077	1.78667	351.733	1.49	144.26	0.12	222.3	-0.366667	893	85.5333	0
2019-01-17 12:00:00	1.57333	103.59	1.82	113.833	1.31667	354.9	0	222.34	-0.3	893	85.04	0
2019-01-17 12:15:00	1.02	324.203	1.17667	356.267	0.646667	0.766667	0	222.327	0.22	893	84.3667	0
2019-01-17 12:30:00	0.56	109.103	0.656667	119.887	0.393333	143.673	1.02	200.967	1.09333	893	81.7667	0
2019-01-17 12:45:00	0.42	75.3	0.493333	82.74	0.673333	171.667	1.41667	182.967	2.11	893	79.4533	0
2019-01-17 13:00:00	1.26667	173.333	1.46	190.467	1.58	166.333	2.06333	215.7	2.86333	892.6	80.3	0.100667
2019-01-17 13:15:00	2.81333	143.88	3.23667	158.1	3.09333	181.933	3.20333	184.1	2.76333	892	83.0667	0.261333
2019-01-17 13:30:00	3.26667	139.687	3.76333	153.5	3.6	177.4	3.70333	196.5	2.81667	892	83.4	1.15667
2019-01-17 13:45:00	3.75333	156.973	4.32667	172.5	4.13	181.267	4.44333	182.867	2.96333	891.267	82.9	2.60933
2019-01-17 14:00:00	3.11333	144.907	3.58667	159.233	3.53	193.933	3.83667	204.733	3.02333	891	82.7	1.526
2019-01-17 14:15:00	3.28	145.51	3.77	159.9	3.78	185.1	3.75	197.1	3.11	891	82.8267	1.568
2019-01-17 14:30:00	3.104	129.399	3.56733	142.193	3.59733	163.687	3.55933	196.393	3.12467	891	83.5467	0.790667
2019-01-17 14:45:00	2.89667	147.057	3.33333	161.6	3.32	152.967	3.05333	169.467	3.11333	890.267	83.0667	0.859333
2019-01-17 15:00:00	3.37	158.763	3.87333	174.467	3.84667	157.26	3.88667	177.867	3.04	890	83.5333	1.21333
2019-01-17 15:15:00	2.67667	188.463	3.08	207.1	3.05667	189.267	3.25333	169.133	3.06	890	84.2067	1.072
2019-01-17 15:30:00	2.41	166.863	2.77333	183.367	2.93667	168.6	3.21333	179.4	3.16667	890	84.1	1.25933
2019-01-17 15:45:00	2.72	182.453	3.13	200.5	3.34	199.067	3.45	183.933	3.15933	890	84.6667	1.51067
2019-01-17 16:00:00	2.13333	170.813	2.45667	187.7	2.66	174.133	3.00333	170.733	3.19667	890	84.6667	1.50333
2019-01-17 16:15:00	2.27	158.793	2.62	174.5	2.66667	177.067	3.14333	167.333	3.12	889.933	84.6	1.50733
2019-01-17 16:30:00	1.79667	140.36	2.06667	154.233	2.28	161.067	2.55667	195.733	3.084	889	84.56	1.14333
2019-01-17 16:45:00	2.12333	180.73	2.44667	198.6	2.72333	187.567	3.11667	201.567	3.10667	889	83.8	1.77467
2019-01-17 17:00:00	1.82333	161.923	2.1	177.933	2.29	170.367	2.62333	191.567	3.08667	889	83.7333	1.61933
2019-01-17 17:15:00	0.986667	135.84	1.14	149.267	1.31667	178.5	1.90333	191	3.05	889	84.1	1.41867
2019-01-17 17:30:00	1.16	151.313	1.34667	166.267	1.67	218.14	1.93667	206.2	2.99667	889	84.6333	1.8
2019-01-17 17:45:00	1.272	167.724	1.464	184.3	1.884	201.3	2.024	211.22	2.956	889	85.1067	1.55667
2019-01-17 18:00:00	0.22	90.6067	0.253333	99.5667	0.4	174.433	0.44	162.167	2.90667	889	85.6	1.864
2019-01-17 18:15:00	1.26333	178.88	1.46667	196.567	1.93333	213.967	2.13667	214.233	2.78667	889	86.4	1.50533
2019-01-17 18:30:00	1.65	181.427	1.9	199.367	2.34667	220.567	2.31667	212.767	2.76667	889	86.64	1.08533
2019-01-17 18:45:00	1.18	156.01	1.36	171.433	1.74	193.667	2.15333	205.827	2.72333	888.933	87.0667	0.729333
2019-01-17 19:00:00	1.16	157.95	1.33333	173.567	1.76667	207.467	2.24667	211.867	2.65667	888	87.6	0.512667
2019-01-17 19:15:00	1.68667	176.877	1.94667	194.367	2.52333	216.7	2.84667	214.767	2.61667	888	88.1	0.217333
2019-01-17 19:30:00	1.79333	182.403	2.06	200.433	2.71667	224.767	2.72	216.367	2.71	888	88.1	0.398
2019-01-17 19:45:00	1.08667	163.08	1.25333	179.2	1.59667	212.167	1.86	211.2	2.70333	888	88.2333	0.937333
2019-01-17 20:00:00	0.913333	152.513	1.06	167.6	1.59667	202.167	1.81333	208.8	2.60333	888	88.8333	0.827333
2019-01-17 20:15:00	1.246	163.737	1.43933	179.933	1.942	202.5	2.11267	220.36	2.51133	888	89.56	1.03667
2019-01-17 20:30:00	1.69	165.503	1.95333	181.867	2.43333	209.167	2.48	210.233	2.516	888.4	89.8667	1.08733
2019-01-17 20:45:00	1.98	164.65	2.28667	180.933	2.56	195.567	2.60667	198.333	2.50733	889	90.3333	1.40733
2019-01-17 21:00:00	1.82667	158.157	2.1	173.8	2.29333	210.167	2.34667	197.667	2.49667	889	90.64	1.15733
2019-01-17 21:15:00	1.44667	161.353	1.67333	177.3	2.00333	190.6	2.14333	201.667	2.44667	889	90.84	2.28333
2019-01-17 21:30:00	1.56	170.2	1.79333	187.033	2.18333	211.867	2.55	214.333	2.43333	889	91.04	2.052
2019-01-17 21:45:00	1.26	158.523	1.46	174.2	2	202.7	2.27	212.667	2.41333	889	91.3	2.188
2019-01-17 22:00:00	1.31333	156.29	1.52	171.733	1.88667	197.633	2.01667	218.133	2.42667	889	91.34	2.65267
2019-01-17 22:15:00	1.15	148.603	1.32667	163.3	1.78667	219.133	1.89667	219.5	2.39667	889	91.54	2.38533
2019-01-17 22:30:00	0.996667	168.077	1.14667	184.7	1.49333	210.4	1.95	211.3	2.37	888.6	91.74	2.33
2019-01-17 22:45:00	1.32667	157.4	1.52667	172.967	2.12333	204.767	2.58667	212.667	2.36667	888.667	91.8067	3.17933
2019-01-17 23:00:00	1.60667	168.2	1.85333	184.833	2.55667	210.567	2.84	211.333	2.37333	888	91.9	3.808
2019-01-17 23:15:00	1.73333	172.093	1.99667	189.1	2.67	215.667	2.64333	216.433	2.40667	888	91.82	3.33133
2019-01-17 23:30:00	1.37333	171.413	1.58333	188.367	2.35	228.4	2.42333	224.033	2.36	888	91.9	2.984
2019-01-17 23:45:00	1.94	182.333	2.23333	200.367	3.04667	224.3	2.98333	223.667	2.35	888	92	2.11133
2019-01-18	1.75857	167.15	2.02643	183.671	2.79214	224.886	2.66571	215.543	2.38929	888	92	1.44429
2019-01-18 00:15:00	1.41333	179.24	1.63	196.967	2.46	215.2	2.24333	212.273	2.39333	888	92.08	0.762667
2019-01-18 00:30:00	1.03333	181.667	1.19	199.633	1.96667	214.867	1.79667	208.567	2.36667	888	92.24	0.268667
2019-01-18 00:45:00	0.433333	183.73	0.5	201.9	0.863333	216.733	0.89	213.673	2.31	888	92.38	0.112667
2019-01-18 01:00:00	0.146667	183.73	0.166667	201.9	0.283333	239	0.53	232.033	2.35	888	92.3667	0
2019-01-18 01:15:00	0.01	183.736	0.01	201.907	0.016667	247.273	0.03	237.313	2.35	887.933	92.3067	0
2019-01-18 01:30:00	0.07	207.78	0.09	228.333	0.13	270.567	0.303333	278.9	2.27667	887	92.8	0
2019-01-18 01:45:00	0.673333	117.98	0.78	129.64	0.933333	219.437	0.973333	310.353	1.88	887	93.1	0
2019-01-18 02:00:00	1.37333	107.46	1.58	118.08	1.84667	10.5767	1.24667	112.673	1.70667	887	93.4333	0
2019-01-18 02:15:00	2.04333	219.543	2.34667	241.253	2.94	12.7433	2.55	17.9367	1.61667	887	93.9067	0
2019-01-18 02:30:00	2.24333	12.03	2.58	13.2133	3.48	2.17	3.55	15.0167	1.47667	887	94.1333	0.221333
2019-01-18 02:45:00	2.54667	229.16	2.93	251.817	3.89333	11.2433	4.14	9.95667	1.29	886.933	94.6333	2.17933
2019-01-18 03:00:00	3.14	36.7667	3.61667	40.3967	4.51333	9.47667	4.57333	20.37	1.14333	886	95.1	5.59067
2019-01-18 03:15:00	3.19333	112.393	3.67667	123.507	4.97333	7.49667	5.14667	20.9633	1.00333	886	96.1	8.032
2019-01-18 03:30:00	3.25333	104.927	3.74333	115.3	5.25333	9.09	5.39333	20.0233	0.896667	886	96.9	9.75333
2019-01-18 03:45:00	3.14333	13.9633	3.61333	15.3333	4.90667	4.73667	5	8.39333	0.726667	886	97.6333	11.124
2019-01-18 04:00:00	3.59667	191.63	4.14	210.58	5.38	7.29667	5.12667	13.5333	0.58	886	97.86	12.7447
2019-01-18 04:15:00	3.53333	23.7933	4.06333	26.15	5.14	117.693	5.10333	17.49	0.473333	886	97.8067	11.6873
2019-01-18 04:30:00	3.366	193	3.87	212.08	5.59	143.3	5.536	7.192	0.454	886	98.02	14.184
2019-01-18 04:45:00	3.95333	20.3367	4.55	22.34	5.98733	0.21	6.05667	123.927	0.366667	886	98.1733	16.5507
2019-01-18 05:00:00	3.96667	7.43	4.57667	8.16667	6.56333	1.18333	6.53	122.567	0.353333	886	98.4	18.912
2019-01-18 05:15:00	4.03667	310.35	4.64333	341.033	6.61667	11.79	6.39333	120.28	0.336667	886	98.7067	20.1267
2019-01-18 05:30:00	4.15667	103.723	4.78333	113.98	6.49	238.077	6.34	123.7	0.31	886	98.84	20.0433
2019-01-18 05:45:00	3.46	292.603	3.98	321.533	6.02	121.573	6.28	11.92	0.296667	886	99.1667	20.0487
2019-01-18 06:00:00	3.42	105.03	3.94	115.413	6.12	115.607	6.24667	7.36667	0.276667	886	99.34	19.522
2019-01-18 06:15:00	3.73333	3.15	4.29333	3.45333	6.39667	20.7633	6.48333	12.65	0.243333	886	99.6067	19.0573
2019-01-18 06:30:00	4.10667	209.443	4.72667	230.147	6.49667	17.67	6.51	16.41	0.243333	886	99.7	20.4827
2019-01-18 06:45:00	3.84667	209.937	4.43333	230.7	6.02	11.18	6.17333	13.38	0.22	886	99.7733	20.2967
2019-01-18 07:00:00	4.02	110.003	4.62667	120.88	6.28667	7.37333	6.46	11.8067	0.2	886	99.84	21.668
2019-01-18 07:15:00	3.77333	16.7767	4.34333	18.4333	6.10333	0.15	6.26667	12.0533	0.2	886	99.9733	21.3647
2019-01-18 07:30:00	4.08	191.79	4.704	210.756	6.868	21.12	6.924	13.584	0.206	886	100	23.5393
2019-01-18 07:45:00	4.46333	222.573	5.14333	244.583	7.50333	349.967	7.3	6.49	0.236667	886	99.9867	24.3573
2019-01-18 08:00:00	4.17667	37.2867	4.80333	40.97	7.025	130.444	7.16	9.66071	0.23	886	99.76	23.986
2019-01-18 08:15:00	4.06667	204.15	4.68	224.337	6.69	123.98	6.72	6.77	0.25	886	99.3333	23.654
2019-01-18 08:30:00	3.76	49.668	4.324	54.576	6.154	147.86	6.054	15.474	0.332	886	98.58	22.3847
2019-01-18 08:45:00	3.57	21.3267	4.10333	23.4233	5.54667	4.43	5.53333	10	0.476667	886	97.3667	23.5767
2019-01-18 09:00:00	3.80333	54.3667	4.38333	59.7367	5.94667	23.37	6.15333	2.42667	0.543333	886.4	96.9	23.9313
2019-01-18 09:15:00	3.88	93.6367	4.46333	102.893	6.10333	1.74333	6.46667	13.1867	0.603333	887	96.5667	20.5733
2019-01-18 09:30:00	3.62667	304.95	4.17	335.1	6.17667	5.23	6.56667	10.9933	0.656667	887	96.4333	24.334
2019-01-18 09:45:00	3.6	211.08	4.15	231.95	5.91	4.78667	6.37333	11.5867	0.726667	887	96.7	23.0547
2019-01-18 10:00:00	3.326	46.224	3.832	50.788	5.888	9.75	5.888	15.634	0.808	887	97.06	21.5553
2019-01-18 10:15:00	3.81	312.22	4.38	343.1	6.03333	16.7667	6.33333	18.75	0.886667	887	97.2267	23.0467
2019-01-18 10:30:00	3.87	286.68	4.45333	315.033	6.58	16.3667	6.764	16.09	1.02667	887	96.7333	26.7487
2019-01-18 10:45:00	4.05533	31.1347	4.67267	34.2053	6.93867	27.5307	7.14067	9.02333	1.31067	887.733	95.52	29.526
2019-01-18 11:00:00	3.95333	12.05	4.54667	13.2333	7.23	8.98333	7.44667	9.19333	1.43667	888	94.6	24.582
2019-01-18 11:15:00	3.81	70.22	4.38	77.16	5.99	12.46	6.31	18.59	2	888	93.1	19.267
2019-01-18 11:30:00	4.05667	9.55333	4.67667	10.49	6.38667	15.3	6.64333	16.6133	3.42	888	87.3667	15.5893
2019-01-18 11:45:00	3.94	67.7867	4.53667	74.49	6.59667	18.3167	6.66667	25.93	4.85333	888	80.7333	15.4047
2019-01-18 12:00:00	4.13333	118.027	4.75667	129.69	6.61	13.63	6.78	28.31	4.99333	888	78.84	16.4767
2019-01-18 12:15:00	4.61333	33.2267	5.31	36.5	7.21	18.9267	7.34667	29.4767	5.32667	888	74.8567	19.6227
2019-01-18 12:30:00	4.72	223.473	5.44333	245.567	7.52333	20.0467	7.72	32.3633	5.9	887.6	71.2433	21.094
2019-01-18 12:45:00	4.78667	30.1167	5.51333	33.0967	7.75667	23.1933	7.94	26.6967	6.17	887	68.18	27.7993
2019-01-18 13:00:00	5.36	49.63	6.16	54.53	8.80333	22.7867	9.14	32.8833	6.88333	887	63.9133	33.2613
2019-01-18 13:15:00	5.36667	142.907	6.17667	157.033	8.96333	20.34	9.22	32.2833	7.14333	887	61.8167	35.192
2019-01-18 13:30:00	5.73333	302.453	6.59667	332.367	9.20333	18.9933	9.19333	24.5633	7.29667	887	60.3567	35.4167
2019-01-18 13:45:00	5.84667	23.6867	6.73667	26.0267	9.49667	13.5267	9.23333	26.95	7.60667	887	58.4467	34.9687
2019-01-18 14:00:00	5.9	11.6667	6.79667	12.82	9.774	16	9.24	32.1967	8.18	887	55.3533	32.89
2019-01-18 14:15:00	5.71	114.873	6.56667	126.233	9.24	28.5533	9.11	21.8067	8.26733	886.933	54.82	35.0847
2019-01-18 14:30:00	5.40333	110.967	6.21333	121.94	8.98667	19.8067	8.67	29.0467	8.55667	886	53.1467	34.7813
2019-01-18 14:45:00	5.76333	290.967	6.62667	319.733	9.57667	34.28	9.61333	37.6767	8.66933	886	51.8267	37.84
2019-01-18 15:00:00	5.53667	114.947	6.36667	126.313	9.405	21.6471	8.92214	33.0107	8.77333	886	51.46	37.4
2019-01-18 15:15:00	5.71333	48.25	6.56667	53.01	9.53667	25.6367	9.03333	30.58	8.74	886	50.6867	34.5627
2019-01-18 15:30:00	5.42667	197.817	6.24667	217.377	9.31667	25.75	8.74	34.8267	7.44667	886	54.5667	32.0207
2019-01-18 15:45:00	5.14333	45.9033	5.91667	50.44	8.79	11.64	8.32333	17.8133	7.26333	885.933	55.2467	27.5433
2019-01-18 16:00:00	5.62333	253.043	6.47667	278.067	9.55	19.68	9.20333	20.1	7.99	885	53.26	33.198
2019-01-18 16:15:00	5.46667	80.8733	6.28333	88.8667	9.56	6.31	9.40667	25.65	8.02	885.067	52.36	36.55
2019-01-18 16:30:00	5.76	206.267	6.62333	226.667	10.0667	28.8767	9.62667	23.8167	7.92	886	52.48	32.9833
2019-01-18 16:45:00	6.13	211.22	7.05333	232.107	10.4367	11.04	9.92667	29.6133	7.60333	886	53.116	41.9587
2019-01-18 17:00:00	6.34333	174.273	7.3	191.507	10.9833	9.92667	10.9533	34.5733	7.04333	886	53.3	36.7093
2019-01-18 17:15:00	5.08	260.29	5.84	286.033	9.18	9.94667	9.09667	20.6133	6.80333	886	54.5333	32.4093
2019-01-18 17:30:00	5.38667	190.53	6.19333	209.367	9.45333	15.88	9.39	33.06	6.11	886	55.8733	36.0953
2019-01-18 17:45:00	5.65333	114.78	6.50667	126.133	9.87667	21.82	10.29	31.2233	5.54333	886	55.84	35.53
2019-01-18 18:00:00	4.87333	203.48	5.61333	223.6	8.73	21.4333	8.91	25.41	5.22333	886	56.84	33.1533
2019-01-18 18:15:00	4.26333	84.1533	4.91333	92.48	7.74	27.5333	7.44333	31.56	4.91	885.933	57.43	32.0447
2019-01-18 18:30:00	4.045	148.76	4.665	163.47	7.381	28.365	7.19	26.24	4.66	885	57.675	30.769
2019-01-18 18:45:00	4.09	251.43	4.72	276.3	7.44	20.04	7.304	32.32	4.31	885	58.27	26.871
2019-01-18 19:00:00	3.92	168.297	4.50667	184.933	7.29333	30.8167	6.00333	27.3833	4.13667	886	58.51	22.6393
2019-01-18 19:15:00	3.64333	122.903	4.18667	135.057	6.98667	34.81	5.13	14.22	3.91667	886	59.68	20.5847
2019-01-18 19:30:00	3.35	17.4367	3.85333	19.1633	6.5	36.3967	5.70333	29.44	3.64333	886	61.0067	21.6247
2019-01-18 19:45:00	3.24	157.46	3.73	173.033	6.27333	32.33	6.95	34.2733	3.31	886	62.95	18.8167
2019-01-18 20:00:00	3.27333	216.553	3.77	237.967	6.48	25.3433	7.07667	30.7933	2.91	886	65.1967	20.6893
2019-01-18 20:15:00	3.56	192.79	4.1	211.853	7.04667	21.73	7.29333	27.31	2.65333	886	67.59	25.1093
2019-01-18 20:30:00	3.97333	60.7233	4.57333	66.72	7.76	19.8167	7.93333	27.3767	2.51333	886	69.33	29.5293
2019-01-18 20:45:00	4.24667	192.077	4.89333	211.067	8.39333	10.6867	8.72333	26.0933	2.53667	886	70.3233	27.72
2019-01-18 21:00:00	4.16667	191.23	4.79333	210.133	8.14	11.8733	8.43	25.6533	2.64333	886	70.4367	25.466
2019-01-18 21:15:00	4.09333	158.09	4.72	173.717	7.73	17.2967	8.05933	26.9767	2.78667	886	69.5667	22.4353
2019-01-18 21:30:00	4.08667	192.237	4.7	211.25	7.61667	10.81	7.92333	34.6367	2.88	886	68.8533	23.354
2019-01-18 21:45:00	3.90667	107.203	4.49	117.8	7.07333	19.42	7.45667	29.3867	3.05933	886	67.7733	23.0853
2019-01-18 22:00:00	3.88	129.337	4.46333	142.127	7.36	13.18	7.85	30.98	2.88333	886.4	69.1733	19.742
2019-01-18 22:15:00	3.716	277.392	4.27467	304.825	6.85	19.8627	7.35333	14.8007	2.73933	887	70.1827	18.4113
2019-01-18 22:30:00	3.225	268.995	3.71	295.6	5.965	12.895	6.39	12.94	2.62	887	70.815	16.404
2019-01-18 22:45:00	2.84667	125.16	3.28333	137.54	4.26667	9.39333	4.56667	22.0867	2.82333	887	70.2933	11.406
2019-01-18 23:00:00	2.584	129.578	2.968	142.386	4.536	37.646	4.64	19.224	2.758	887	70.16	11.1447
2019-01-18 23:15:00	2.64	116.623	3.04	128.147	4.75333	43.17	4.91333	15.7967	2.36	887	71.0267	9.29467
2019-01-18 23:30:00	2.45333	310.983	2.82667	341.733	4.35333	11.2567	4.34667	14.1767	2.32	887	70.92	8.20333
2019-01-18 23:45:00	2.20667	310.857	2.55	341.6	3.87667	235.86	3.99	2.36667	2.15333	887	71.55	7.43733
2019-01-19	2.21714	296.67	2.55357	326.007	3.96714	0.407143	4.10643	0.227143	1.93	887	72.53	7.37286
2019-01-19 00:15:00	2.49333	216.467	2.86667	237.867	4.48667	5.32333	4.66667	6.94	1.82	887	73.7233	9.56667
2019-01-19 00:30:00	2.47333	323.607	2.84667	355.6	4.60667	43.29	4.90667	8.4	1.62667	887	74.8167	9.29933
2019-01-19 00:45:00	2.57333	157.133	2.96	172.667	4.77667	9.19667	4.91333	9.91	1.72333	887	75.52	8.15333
2019-01-19 01:00:00	2.48667	300.187	2.86667	329.867	4.56333	3.42333	4.73333	9.99	1.63	887	76.3933	9.65933
2019-01-19 01:15:00	2.65	21.0467	3.04333	23.1167	4.82	14.95	4.94067	21.8667	1.32667	887	80.02	8.99067
2019-01-19 01:30:00	2.49	5	2.87	5.49	4.65333	9.92333	4.97667	19.86	1.08667	887	81.8667	8.04133
2019-01-19 01:45:00	2.59333	293.45	2.98667	322.467	4.92667	11.5467	5.34667	15.2467	0.91	887	82.8	8.94933
2019-01-19 02:00:00	2.72667	300.97	3.13333	330.733	5.34	12.52	5.54667	16.1867	0.676667	887	83.44	10.018
2019-01-19 02:15:00	2.73333	306.671	3.14333	337	5.04	16.4467	5.55333	21.6533	0.493333	887	85.1	8.64133
2019-01-19 02:30:00	2.72	102.5	3.13	112.633	4.99333	15.8267	5.22	24.28	0.406667	887	86.14	11.1627
2019-01-19 02:45:00	2.86333	107.497	3.29	118.12	5.24667	16.95	5.47	21.772	0.436667	887	85.8	10.77
2019-01-19 03:00:00	2.89	102.757	3.33	112.92	5.48667	10.4433	5.48333	19.2	0.223333	887	86.36	11.9
2019-01-19 03:15:00	2.94667	310.557	3.4	341.267	5.08333	12.8333	5.22	7.53333	0.336667	887	85.3933	13.476
2019-01-19 03:30:00	2.90667	291.743	3.35333	320.6	4.80333	8.42	5.3	19.3867	0.376667	887	84.5	14.6827
2019-01-19 03:45:00	2.79667	189.493	3.21667	208.22	4.41667	237.917	4.70667	16.9733	0.53	887	82.6	14.0387
2019-01-19 04:00:00	2.80333	183.787	3.22333	201.953	4.65667	231.717	4.53333	19.6933	0.456667	887	83.0667	10.2273
2019-01-19 04:15:00	2.47467	294.672	2.852	323.807	4.06533	275.347	4.11867	12.5013	0.683333	887	82.6133	6.698
2019-01-19 04:30:00	2.36	107.8	2.71667	118.453	4.02667	18.61	4.23	0.533333	0.85	887	82.1	7.756
2019-01-19 04:45:00	2.50667	299.25	2.88667	328.833	3.88333	7.00333	4.47	12.5067	0.88	887	80.8667	11.372
2019-01-19 05:00:00	2.56667	96.4567	2.95333	105.993	4.03667	1.28333	4.70333	6.78	0.82	887	81.8	12.8827
2019-01-19 05:15:00	3.19333	216.467	3.67667	237.867	5.37333	10.7367	5.68667	9.23333	0.826667	887	81.94	17.7653
2019-01-19 05:30:00	3.66667	209.967	4.21667	230.733	6.09333	27.2167	6.82667	18.48	0.866667	887	81.9	21.966
2019-01-19 05:45:00	3.73	41.21	4.29333	45.2867	6.53667	22.79	7.45333	26.1033	0.773333	887	82.14	24.2
2019-01-19 06:00:00	4.10333	40.5233	4.72667	44.52	6.90333	21.1567	7.48	239.497	0.753333	887	81.7	27.2193
2019-01-19 06:15:00	3.96	307.733	4.56	338.167	6.76667	17.18	7.28333	17.7767	0.723333	887	80.8	28.6367
2019-01-19 06:30:00	3.63333	95.3533	4.18	104.78	6.66667	15.9533	7.20333	16.33	0.656667	887	80.5333	30.2093
2019-01-19 06:45:00	3.95333	117.273	4.54667	128.867	7.01333	4.10333	8.16	22.95	0.323333	887	82.1	33.7933
2019-01-19 07:00:00	4.44667	161.013	5.11333	176.933	7.02667	12.4567	7.87333	18.2967	0.276667	887	81.9667	37.2687
2019-01-19 07:15:00	4.68267	234.114	5.39667	257.257	7.75933	9.80533	8.442	9.60067	0.368	887	81.3067	37.826
2019-01-19 07:30:00	4.08	194.677	4.70333	213.93	7.65333	13.1167	8.45667	14.7733	0.22	887	82	36.878
2019-01-19 07:45:00	4.01333	251.007	4.61667	275.833	7.56	7.32667	8.54333	12.79	0.016667	887	83.5667	41.5253
2019-01-19 08:00:00	4.53333	297.66	5.21667	327.1	7.56667	6.20667	8.63667	12.3633	0.096667	887	82.0333	39.7747
2019-01-19 08:15:00	4.87333	111.163	5.60667	122.153	7.08333	338.867	7.08	6.28333	0.306667	887.067	79.2033	37.6813
2019-01-19 08:30:00	4.38	114.183	5.04667	125.48	6.11	115.333	6.32667	10.9233	0.273333	888	79.2433	41.4307
2019-01-19 08:45:00	4.86	11.7133	5.58667	12.87	8.09667	14.82	8.22333	15.77	-0.043333	888	81.4333	45.1393
2019-01-19 09:00:00	5.68667	188.26	6.54667	206.877	9.45667	15.02	9.65	22.0167	0.19	888	79.6933	33.3027
2019-01-19 09:15:00	4.75333	238.783	5.47	262.4	8.98	7.68333	9.06667	18.63	0.686667	888	77.12	19.0687
2019-01-19 09:30:00	3.96	53.9433	4.55667	59.2733	7.33333	12.9233	7.79333	25.49	1.32	888.4	73.82	24.1727
2019-01-19 09:45:00	4.07	96.5233	4.69	106.067	6.74333	10.4	7.29667	23.3967	1.59667	889	71.02	22.2893
2019-01-19 10:00:00	4.01667	115.21	4.62333	126.6	6.65667	17.06	7.19667	17.23	1.49	889	71.4533	21.0927
2019-01-19 10:15:00	3.46	311.217	3.98333	342	6.25	9.81	6.69667	19.0233	2.63667	889.733	71.0767	17.7327
2019-01-19 10:30:00	3.18667	312.37	3.67667	343.267	5.58333	18.0033	5.93667	10.3767	3.45	890	67.25	18.9893
2019-01-19 10:45:00	3.48	206.927	4.00333	227.397	6.05	11.87	6.53333	27.0433	3	890	68.2633	14.604
2019-01-19 11:00:00	3.06	214.513	3.52333	235.73	5.33667	9.49667	6.34667	25.91	3.28667	890	66.37	13.0767
2019-01-19 11:15:00	3.63333	123.34	4.18	135.527	5.82333	19.8467	6.46	22.9067	3.8	890	64.5033	13.916
2019-01-19 11:30:00	3.80667	300.393	4.38667	330.1	6.15667	16.4533	6.52667	13.94	4.12667	890	62.63	16.832
2019-01-19 11:45:00	3.91	28.67	4.49667	31.5	6.87667	7.20667	7.20667	14.08	5.59333	890	55.2067	19.7
2019-01-19 12:00:00	4.09667	28.19	4.71	30.98	7.32333	13.4133	7.55333	21.1933	5.54	890	49.5067	16.1907
2019-01-19 12:15:00	3.89333	171.432	4.476	188.381	6.57533	15.882	6.61333	25.9427	5.27067	890	48.3727	10.9407
2019-01-19 12:30:00	3.37333	22.5	3.88667	24.73	5.50333	6.77667	5.60667	22.9067	5.21333	889.6	49.7767	10.308
2019-01-19 12:45:00	3.19	203.5	3.66667	223.613	5.36667	9.51667	5.27	10.3467	5.57667	889	50.4033	12.9913
2019-01-19 13:00:00	3.87	44.04	4.45333	48.3867	5.31333	18.6767	5.23	15.42	5.61	889	47.7567	10.2013
2019-01-19 13:15:00	3.79	19.9	4.35667	21.87	4.92667	16.6267	4.73333	5.10333	6.12667	888.933	45.5633	6.67133
2019-01-19 13:30:00	3.92333	230.3	4.52333	253.07	6.02	15.8933	5.63333	22.7567	7.41333	888	43.4167	7.00933
2019-01-19 13:45:00	3.95333	234.813	4.55	258.037	6.40667	18.9533	6.23	22.9967	8.35	888	41.1233	5.46533
2019-01-19 14:00:00	3.43333	181.733	3.95	199.703	5.22	12.6	4.99	15.2367	9.17667	888.4	39.1767	4.16733
2019-01-19 14:15:00	2.84933	137.841	3.27733	151.471	3.90533	21.9373	3.57133	29.3413	8.92067	889	38.7847	4.11933
2019-01-19 14:30:00	3.22	302.637	3.70667	332.567	4.91333	9.52333	4.82667	25.2167	9.09	889	38.51	4.22133
2019-01-19 14:45:00	3.66667	30.4033	4.22333	33.4067	5.47	24.9	5.29667	27.0833	9.79	889	36.1033	4.33867
2019-01-19 15:00:00	3.59333	241.557	4.13667	265.433	5.81667	23.22	5.64333	32.2833	9.93667	889	35.3967	4.63933
2019-01-19 15:15:00	3.23	321.927	3.71333	353.767	5.92333	18.0467	5.59933	14.8067	11.1067	889	32.77	4.29
2019-01-19 15:30:00	3.07667	314.04	3.54	345.1	5.24333	15.6	4.97	20.22	10.9867	889	32.2767	5.90467
2019-01-19 15:45:00	3.552	27.44	4.09	30.1453	5.594	30.192	5.388	14.42	10.276	889	32.704	6.75533
2019-01-19 16:00:00	2.97333	19.2333	3.43333	21.1233	5.29	16.4167	5.04	20.9333	11.06	889	31.1467	6.86067
2019-01-19 16:15:00	2.97333	177.107	3.42333	194.623	5.25667	21.3367	5.12667	15.5767	10.7633	889	30.4167	7.26267
2019-01-19 16:30:00	3.44667	21.8067	3.97	23.9567	6.17667	4.57	5.75333	14.2167	10.2567	889	30.9633	10.814
2019-01-19 16:45:00	3.42	0.05	3.93	0.05	6.41	17.21	6.3	27.41	9.81	889	31.58	12.956
2019-01-19 17:00:00	3.60667	289.237	4.15333	317.833	6.72	17.5567	6.75	35.9767	9.66667	889	31.5767	14.3813
2019-01-19 17:15:00	3.84667	47.0633	4.43333	51.7167	7.37333	22.65	7.16333	23.5933	9.46333	889	31.8867	14.5673
2019-01-19 17:30:00	3.74	135.91	4.3	149.343	7.01333	16.6367	6.94333	20.6267	8.63667	889	33.48	13.5693
2019-01-19 17:45:00	3.52667	213.197	4.05667	234.283	6.50333	12.9967	6.31333	22.4567	8.03667	889	35.7267	14.5013
2019-01-19 18:00:00	3.65333	12.5433	4.20333	13.7833	6.80333	12.77	6.76	37.1833	7.56333	889	37.1733	17.5033
2019-01-19 18:15:00	3.83667	253.503	4.42333	278.567	7.40333	19.98	7.62	27.1467	7.09667	889	39.29	19.5647
2019-01-19 18:30:00	4.33	52.6367	4.99	57.8333	8.27667	17.02	8.70667	35.6067	6.70333	889	41.2167	23.9993
2019-01-19 18:45:00	4.84	224.143	5.57	246.3	8.85	24.1767	8.95	38.0167	6.57667	889	44.1067	27.5427
2019-01-19 19:00:00	4.45333	220.857	5.13667	242.7	8.01	25.2967	6.64333	34.7167	6.71	889	44.5	28.9
2019-01-19 19:15:00	3.98	60.0933	4.58	66.0333	7.22	31.5967	5.33333	28.3533	6.74	889	44.46	30.2147
2019-01-19 19:30:00	3.74	161.68	4.31333	177.667	7.03333	38.5167	5.33333	38.1	6.51333	889	45.1667	25.1733
2019-01-19 19:45:00	3.72	184.61	4.28667	202.87	6.95	32.7333	6.92667	32.9333	6.39333	889.067	43.7167	18.568
2019-01-19 20:00:00	3.21333	221.75	3.69333	243.67	5.93	16.4067	6.01333	32.8867	6.25333	890	43.7967	17.6127
2019-01-19 20:15:00	3.12667	201.717	3.6	221.663	6	12.1433	6.16333	25.0533	5.99667	890	44.1333	16.8913
2019-01-19 20:30:00	3.45333	68.9767	3.97333	75.7967	6.6	12.2433	6.64333	18.9133	5.86333	890	43.78	15.846
2019-01-19 20:45:00	3.00333	266.243	3.45	292.567	5.83333	14.4	5.98	22.48	5.83	890	43.91	12.5733
2019-01-19 21:00:00	2.73	256.043	3.13667	281.367	5.28	16.3933	5.42	30.4533	5.81	890.4	44.51	8.16533
2019-01-19 21:15:00	2.33333	300.243	2.69333	329.933	4.46	127.32	4.19667	23.1833	5.72	891	45.2233	5.59067
2019-01-19 21:30:00	2	289.69	2.30667	318.333	3.70667	126.78	3.65667	26.1967	5.82667	891	44.3367	5.02467
2019-01-19 21:45:00	1.98667	185.67	2.29	204.03	3.51333	115.693	3.41	16.0167	5.68	891	45.1233	6.83333
2019-01-19 22:00:00	1.96	14.0567	2.25667	15.4367	3.55333	123.747	3.35	23.07	5.68	891	45.5767	4.76733
2019-01-19 22:15:00	1.83333	99.46	2.10667	109.287	3.32	23.1033	3.25667	42.6533	5.26667	891.067	47.32	6.47467
2019-01-19 22:30:00	2.10667	302.853	2.43333	332.8	3.72667	21.1233	3.65667	37.5733	4.96667	892	48.7133	5.34067
2019-01-19 22:45:00	2.13333	323.507	2.46	355.5	3.52067	7.33	3.65333	15.2667	4.86333	892	49.0553	6.434
2019-01-19 23:00:00	2.31333	309.733	2.66667	340.367	4.28333	17.9967	4.66	14.0133	4.73667	892	49.1833	8.934
2019-01-19 23:15:00	2.42	0.98	2.78	1.07	4.44	16.03	4.36	17.31	4.71	892	49.15	10.93
2019-01-19 23:30:00	2.655	181.07	3.05	198.975	4.87	13.96	4.98	28.965	4.785	892	49.88	12.778
2019-01-19 23:45:00	2.56	10.69	2.94667	11.7367	4.30667	2.39667	4.24667	17.7833	4.88	892	50.352	16.3287
2019-01-20	2.95143	201.081	3.40214	220.968	4.96214	227.289	5.01857	47.6607	4.83643	892	51.1842	22.3807
2019-01-20 00:15:00	3.34	291.63	3.84667	320.467	5.97	226.63	6.20667	244.473	4.78333	892.067	50.7867	24.6407
2019-01-20 00:30:00	3.78	301.523	4.36	331.333	6.20333	17.49	6.63333	18.3667	4.89667	893	49.8267	27.436
2019-01-20 00:45:00	3.73333	300.027	4.29333	329.7	6.31333	1.85	6.79	24.6	4.78667	893	49.4733	28.6433
2019-01-20 01:00:00	4	126.327	4.60667	138.813	7.09333	15.1567	7.60333	35.04	4.76667	893	49.7933	34.0733
2019-01-20 01:15:00	4.30667	34.1567	4.96	37.5333	7.97	13.87	8.39333	47.6567	4.78	893	48.32	30.4973
2019-01-20 01:30:00	4.12	51.29	4.74	56.3533	7.42333	17.81	7.624	24.83	4.9	893	46.7267	34.9513
2019-01-20 01:45:00	4.06	205.597	4.67333	225.933	7.65333	30.6433	8.27667	34.6633	4.74333	893	46.9967	35.3927
2019-01-20 02:00:00	4.07333	32.6967	4.68667	35.9267	7.78	22.47	8.14333	54.83	4.45	893	46.8433	29.916
2019-01-20 02:15:00	3.86667	225.133	4.45333	247.4	7.496	20.4233	8.05667	31.1667	4.15333	893	46.0433	18.762
2019-01-20 02:30:00	3.30667	241.267	3.81333	265.133	6.31333	15.19	6.25667	29.8867	4.22	893	45.2167	13.9373
2019-01-20 02:45:00	2.64667	287.773	3.05333	316.233	4.97667	14.7333	4.97	35.9833	4.02	893	46.77	9.578
2019-01-20 03:00:00	2.20667	294.813	2.54	323.967	4.15	13.9267	4.16333	26.6767	3.74	893	48.35	6.04267
2019-01-20 03:15:00	1.96667	216.753	2.26667	238.187	3.58	18.5467	3.24	27.1733	3.67333	893	48.92	5.68
2019-01-20 03:30:00	1.88	4.34667	2.16667	4.76667	3.61333	21.5667	3.18667	21.8933	3.6	893	49.9933	4.632
2019-01-20 03:45:00	2.15333	273.373	2.48	300.4	4.26333	10.56	4.08	26.3533	3.63667	893	51.69	6.37267
2019-01-20 04:00:00	2.36667	281.067	2.73333	308.867	4.66333	16.7533	4.59333	31.2533	3.75	893	52.5167	8.47467
2019-01-20 04:15:00	2.24667	108.31	2.58333	119.013	4.39333	15.9733	4.51	31.86	3.81333	893	53.67	6.96867
2019-01-20 04:30:00	2.03333	288.297	2.33667	316.8	3.94667	14.58	4.01667	26.8267	3.836	893	55.0633	6.59933
2019-01-20 04:45:00	2.35	2.2	2.70333	2.42	4.24	6.43667	4.24	23.7733	3.76	893	56.31	12.378
2019-01-20 05:00:00	2.89	216.007	3.32333	237.36	5.51333	16.5233	5.42667	21.8733	3.72667	893	57.51	19.3467
2019-01-20 05:15:00	3	53.44	3.45	58.7133	5.91667	12	5.87667	25.9067	3.43333	893	59.9933	23.4413
2019-01-20 05:30:00	2.99333	263.933	3.44333	290.033	5.59	10.8333	5.61667	16.6867	3.3	893	61.7	28.7127
2019-01-20 05:45:00	4.12	211.157	4.73333	232.033	6.49333	6.18333	6.52	15.3833	3.26	892.333	62.3967	36.3293
2019-01-20 06:00:00	4.64667	116.583	5.34667	128.1	8.18667	11.7967	8.24	19.63	3.26667	893	63.5367	39.4427
2019-01-20 06:15:00	4.44	15.4967	5.11667	17.0233	7.65333	15.7767	7.83	21.74	3.09	893	65.1167	42.292
2019-01-20 06:30:00	4.46667	40.6567	5.15	44.67	8.14667	241.857	8.43	17.62	2.91667	893	66.8167	42.4673
2019-01-20 06:45:00	4.88333	210.527	5.62667	231.337	7.97	9.73333	8.09333	18.82	3.02333	893	67.27	43.3333
2019-01-20 07:00:00	5.00333	215.927	5.75333	237.27	8.26333	9.16	8.49333	20.2333	3.11667	893	67.362	45.7733
2019-01-20 07:15:00	5.03667	316.77	5.79	348.1	8.70333	14.29	8.98933	9.85333	3.06667	893.067	67.8167	46.3707
2019-01-20 07:30:00	4.87667	117.917	5.61667	129.58	8.49667	8.89	9.02667	13.9533	2.94	894	68.67	45.15
2019-01-20 07:45:00	5.01333	231.787	5.76667	254.703	8.8	5.39	9.29667	8.21667	2.76	894	69.6767	47.654
2019-01-20 08:00:00	5.52667	42.6333	6.36	46.8433	9.76667	13.73	10.1833	24.17	2.73333	894	69.8633	49.1547
2019-01-20 08:15:00	5.38	128.407	6.19	141.1	9.88933	7.67	10.3233	19.8	2.74333	894	69.8153	49.4033
2019-01-20 08:30:00	5.21333	299.667	5.994	329.3	9.88667	15.41	10.25	21.0467	2.65	894	70.5967	48.34
2019-01-20 08:45:00	5.02	287.96	5.77333	316.433	9.54	14.7567	9.79667	26.8433	2.71667	894.067	70.3933	47.232
2019-01-20 09:00:00	5.15333	317.993	5.93333	349.433	9.88	20.4833	10.3367	26.3833	3.03	895	68.0667	49.118
2019-01-20 09:15:00	5.76667	194.813	6.64	214.067	10.81	10.55	11.1567	25.5733	3.61	895	62.6133	52.902
2019-01-20 09:30:00	5.82	178.673	6.70667	196.333	11.05	21.53	11.6567	23.1067	3.95	895.4	60.7467	56.1053
2019-01-20 09:45:00	6.82	100.957	7.84667	110.933	12.26	26.54	12.82	30.4733	4.22667	896	59.2633	56.3753
2019-01-20 10:00:00	7.25333	315.563	8.35333	346.767	13.3333	27.72	13.78	25.3133	4.90667	896	54.4967	57.1467
2019-01-20 10:15:00	7.67	50.0967	8.82333	55.0467	13.8633	10.7933	13.904	20.9367	5.65	896.067	48.38	56.36
2019-01-20 10:30:00	7.80333	35.15	8.98333	38.62	13.7233	13.92	13.5733	25.43	5.61667	897	46.18	57.162
2019-01-20 10:45:00	7.24667	257.96	8.34	283.467	13.0333	9.47667	12.95	24.7967	6.31667	897	43.3267	56.6687
2019-01-20 11:00:00	7.24667	101.7	8.34	111.753	12.84	22.0567	12.69	25.41	6.274	897	41.7267	55.088
2019-01-20 11:15:00	6.85333	192.75	7.88	211.813	12.1267	14.2233	12.3767	27.97	7.05333	897	39.1733	54.9093
2019-01-20 11:30:00	6.604	184.04	7.596	202.236	11.782	5.098	11.668	18.774	7.168	897.4	37.64	53.0327
2019-01-20 11:45:00	6.68267	126.703	7.68867	139.23	11.7967	9.34533	11.5847	22.1413	7.57067	898	35.7973	51.404
2019-01-20 12:00:00	6.71067	176.038	7.72133	193.447	11.748	10.4713	11.5787	29.736	7.71933	898	34.824	50.8573
2019-01-20 12:15:00	6.72	20.3767	7.73	22.3933	11.5633	7.52	11.3233	19.2367	7.93333	897.933	34.73	48.34
2019-01-20 12:30:00	6.58667	217.01	7.57667	238.473	11.3567	12.3	11.1433	21.9767	7.87333	897	34.3367	48.058
2019-01-20 12:45:00	6.928	285.561	7.97133	313.793	11.7567	21.9633	11.7373	25.656	7.458	897	35.2907	46.624
2019-01-20 13:00:00	6.36	108.863	7.31667	119.627	10.74	19.0433	10.6433	32.78	7.66	897	35.5767	44.008
2019-01-20 13:15:00	6.75333	240.363	7.76667	264.133	11.5533	21.1033	11.56	24.1767	7.93	897	35.71	46.3707
2019-01-20 13:30:00	6.66667	46.4167	7.66667	51.0067	11.3867	12.43	11.5133	19.0033	7.99	897	36.09	41.8347
2019-01-20 13:45:00	5.50667	18.3167	6.33667	20.1267	9.19667	42.7033	8.26	39.77	7.89333	897	37.48	45.214
2019-01-20 14:00:00	6.16	204.983	7.08333	225.26	10.33	29.69	9.54667	33.67	7.88667	897	37.3	45.136
2019-01-20 14:15:00	6.26333	209.403	7.20667	230.1	10.2667	25.3833	9.97333	25.7333	7.92667	896.933	36.32	44.1033
2019-01-20 14:30:00	6.29	216.797	7.24667	238.233	10.5	32.51	10.2933	27.1067	7.76	896	35.38	45.644
2019-01-20 14:45:00	5.892	121.116	6.78667	133.087	9.82	14.2727	9.80867	31.994	7.684	896	34.756	41.274
2019-01-20 15:00:00	5.97333	271.027	6.87	297.833	10.01	28.64	9.53	33.38	7.44	896	35.32	43.6047
2019-01-20 15:15:00	6.41333	27.23	7.38333	29.9167	10.6367	27.73	10.4467	35.9367	7.17667	896	35.9133	45.7073
2019-01-20 15:30:00	6.18667	38.8567	7.11667	42.69	10.43	13.4833	10.2867	24.53	7.01	896	36.4867	48.8667
2019-01-20 15:45:00	6.99333	134.267	8.05667	147.54	11.7267	20.36	12.15	24.7867	6.64667	896	37.86	51.2067
2019-01-20 16:00:00	6.96667	105.047	8.01667	115.433	11.7933	15.38	12.0167	25.9533	6.36	896	38.9667	50.5027
2019-01-20 16:15:00	7.29667	137.237	8.39333	150.8	12.3133	25.9	12.68	32.8667	6.24933	895.267	39.7633	52.4587
2019-01-20 16:30:00	7.63	98.7367	8.77333	108.487	12.9133	28.3333	13.62	30.7133	6.04667	895	40.71	52.9747
2019-01-20 16:45:00	7.908	120.119	9.096	131.995	13.8607	12.7893	13.7427	18.2053	5.87933	895	42.2893	54.8873
2019-01-20 17:00:00	8.02	146.413	9.22	160.887	14.1033	12.5167	14.1667	18.41	5.59333	895	43.67	56.8693
2019-01-20 17:15:00	8.02	311.22	9.22	342	14.5	17.34	14.68	19.94	5.33	895	45.04	57.136
2019-01-20 17:30:00	8.38	90.7667	9.64667	99.74	14.85	6.35	14.7533	17.81	5.07	895	46.0267	54.322
2019-01-20 17:45:00	7.52	59.1967	8.65333	65.0467	13.3233	11.6867	13.3533	24.8567	4.68333	895.067	46.494	54.7653
2019-01-20 18:00:00	6.44	216.223	7.40667	237.607	11.3367	9.43333	11.58	24.2767	4.51667	896	47.4967	52.2513
2019-01-20 18:15:00	6.43333	207.993	7.4	228.563	11.1367	24.65	11.6567	31.7133	4.4	896	47.8013	51.6533
2019-01-20 18:30:00	6.35333	12.34	7.31333	13.5633	11.0367	12.6567	11.39	28.0467	4.27333	896	48.1733	49.084
2019-01-20 18:45:00	5.92333	60.0767	6.82333	66.01	10.2867	20.3667	11.1767	34.2887	4.13	896	48.386	48.67
2019-01-20 19:00:00	6.05	194.763	6.95667	214.017	10.6667	22.5733	11.21	27.91	4.03	896.4	48.542	49.3847
2019-01-20 19:15:00	6.26	211.463	7.20667	232.377	11.0367	12.5767	11.0633	22.5167	3.94667	897	48.37	51.138
2019-01-20 19:30:00	6.46	14.81	7.42667	16.2767	11.1567	241.883	11.6633	13.4233	3.87333	897	48.3167	53.9087
2019-01-20 19:45:00	7.20667	40.3333	8.3	44.3167	12.72	19.48	12.94	18	3.80333	897	48.276	56.4793
2019-01-20 20:00:00	7.29333	34.68	8.39333	38.1033	12.6	15.78	13.28	28.7667	3.71	897	48.1333	57.0053
2019-01-20 20:15:00	7.51333	25.8733	8.64333	28.42	13.0767	16.4733	13.5	26.2367	3.6	897	48.0213	58.432
2019-01-20 20:30:00	8.32	24.3933	9.57	26.8	14.2833	17.0067	14.4	22.9033	3.56667	897	47.7667	57.988
2019-01-20 20:45:00	8.14067	117.017	9.364	128.588	14.0973	11.9313	14.3927	29.1787	3.39533	897	48.7593	56.0267
2019-01-20 21:00:00	7.74	319.415	8.905	351	13.55	15.93	14.135	28.21	3.23	897	49.635	54.421
2019-01-20 21:15:00	7.84333	289.6	9.02667	318.233	13.9	19.62	14.3133	22.06	3.00667	897.067	50.7833	53.556
2019-01-20 21:30:00	7.47	131.307	8.58667	144.293	12.82	21.52	13.328	38.7667	3.00667	898	50.658	52.61
2019-01-20 21:45:00	6.91667	121.86	7.95333	133.913	12.14	30.3067	12.4567	28.7367	2.95667	898	51.0533	48.69
2019-01-20 22:00:00	6.73667	296.967	7.75333	326.333	11.7533	18.6133	12.0033	19.8633	2.85	898	51.56	44.8773
2019-01-20 22:15:00	6.03333	305.123	6.94	335.3	11	13.23	11.3033	19.7233	2.50667	898	53.3933	46.0207
2019-01-20 22:30:00	6.1	217.223	7.02667	238.7	10.7933	16.13	11.29	23.1433	2.46667	898	53.58	43.0027
2019-01-20 22:45:00	6.20933	283.947	7.14667	312.027	10.9507	14.912	11.484	27.9607	2.54333	898	53.0587	43.166
2019-01-20 23:00:00	5.66	104.54	6.51333	114.88	9.95333	20.5933	10.3933	34.61	2.45	898	52.984	44.196
2019-01-20 23:15:00	5.48	122.603	6.30333	134.72	9.71667	15.6367	10.3087	27.5067	2.31	898	53.0233	42.9913
2019-01-20 23:30:00	6.19333	109.123	7.12333	119.913	10.8433	24.1633	11.43	32.16	2.31	898	52.6033	46.9627
2019-01-20 23:45:00	6.37467	92.1233	7.33	101.227	11.322	25.5373	11.6493	31.9013	2.05933	898	53.1787	42.462
2019-01-21	6.34286	133.543	7.29286	146.744	11.1707	12.2464	11.3743	33.2157	1.86857	898	53.349	40.9986
2019-01-21 00:15:00	6.01667	96.19	6.91667	105.707	10.67	21.21	11.03	26.0967	1.78667	897.333	53.43	38.338
2019-01-21 00:30:00	5.65667	116.057	6.50333	127.533	10.2567	17.71	10.8167	27.6367	1.59333	898	54.1767	36.7867
2019-01-21 00:45:00	5.24	137.067	6.02667	150.617	9.43	16.7067	9.76667	28.5067	1.37333	897.267	54.7667	34.13
2019-01-21 01:00:00	4.5	204.22	5.17333	224.417	8.18333	28.1867	8.60667	31.6067	1.28667	897	54.64	33.354
2019-01-21 01:15:00	5.02667	205.697	5.78	226.03	9.35667	18.8867	9.77667	30.38	0.9	897	56.3867	29.4933
2019-01-21 01:30:00	4.17333	199.33	4.8	219.03	7.92333	11.2467	8.57	24.3933	0.786667	897	56.772	32.402
2019-01-21 01:45:00	4.26667	62.9733	4.91333	69.1933	8.18333	25.5367	8.25667	29.8367	0.636667	897	57.0667	40.6047
2019-01-21 02:00:00	4.60667	7.91333	5.31333	8.69333	8.71	21.6767	8.63667	28.2967	0.39	897	58.3067	46.7753
2019-01-21 02:15:00	5.33333	267.55	6.13	294	9.92667	17.6933	9.90667	25.31	0.283333	897	58.934	48.05
2019-01-21 02:30:00	5.34667	264.63	6.15	290.8	9.92	20.9533	10.4133	30.19	0.196667	897	59.182	41.2947
2019-01-21 02:45:00	4.67	309.98	5.38	340.633	8.72	20.9233	9.96	36.5	0.153333	896.267	58.8633	36.9627
2019-01-21 03:00:00	4.29667	305.973	4.94	336.233	8.02	38.3233	8.91333	37.9133	0.08	896	58.83	39.7633
2019-01-21 03:15:00	4.8	139.227	5.52	152.993	8.79	10.0333	9.11	19.5767	-0.06	896	59.2967	44.7327
2019-01-21 03:30:00	5.39333	20.24	6.2	22.2333	8.97667	13.2933	8.99667	16.0567	0	896	59.27	47.7713
2019-01-21 03:45:00	5.32067	192.033	6.13	211.013	9.16667	13.38	9.29067	16.34	0.053333	896	58.5667	50.182
2019-01-21 04:00:00	5.47	28.4733	6.29	31.2867	9.96667	26.5	10.7333	26.7333	-0.06	896	58.4467	51.3713
2019-01-21 04:15:00	5.48	216.133	6.31	237.5	10.3067	15.4733	10.8633	25.27	-0.143333	895.933	58.2167	51.7993
2019-01-21 04:30:00	5.7	142.827	6.55667	156.947	10.46	18.62	10.65	21.6033	-0.116667	895	57.7633	50.918
2019-01-21 04:45:00	5.92667	256.473	6.81667	281.833	10.7767	13.7267	10.58	24.81	-0.116667	895	58.0587	49.988
2019-01-21 05:00:00	5.63	244.3	6.475	268.45	10.515	11.825	10.455	21.265	-0.355	895	59.645	48.18
2019-01-21 05:15:00	6.04333	192.607	6.95	211.647	11.2893	5.87333	10.9733	21.6467	-0.56	895	60.95	49.8927
2019-01-21 05:30:00	6.14333	208.927	7.06333	229.58	11.4333	13.1867	11.076	16.6133	-0.586667	894.6	60.8833	50.8753
2019-01-21 05:45:00	6.15333	177.757	7.08333	195.333	11.1833	15.5033	10.81	19.8	-0.7	894	61.07	49.5687
2019-01-21 06:00:00	6.27333	133.217	7.22333	146.393	10.938	14.13	10.4033	23.6733	-0.846667	894	62.0967	50.4213
2019-01-21 06:15:00	6.14	20.18	7.06333	22.1667	11.1367	11.9867	10.8367	22.05	-0.853333	894	61.8467	51.82
2019-01-21 06:30:00	6.16667	9.94667	7.09	10.9267	10.7967	8.66	10.3567	15.4833	-0.846667	894	61.7067	52.6767
2019-01-21 06:45:00	5.81333	14.9767	6.69333	16.4567	9.69667	14.19	9.54333	8.08333	-0.88	894.067	61.9013	52.2947
2019-01-21 07:00:00	5.76	187.39	6.63333	205.917	9.47	16.2833	9.47667	14.0367	-0.946667	895	61.9	51.3227
2019-01-21 07:15:00	5.61667	124.867	6.46333	137.207	9.31933	232.99	9.13333	17.7367	-1.07	895	62.2633	50.182
2019-01-21 07:30:00	5.72333	110.893	6.59	121.86	8.93667	11.1967	8.72	14.9633	-1.09667	895	62.3367	48.0567
2019-01-21 07:45:00	5.3	208.97	6.1	229.637	8.75	13.74	8.84667	20.8633	-1.20333	895	62.7673	46.954
2019-01-21 08:00:00	5.16667	202.723	5.94	222.77	8.67	6.86	8.88	12.9433	-1.31667	895	63.09	46.6867
2019-01-21 08:15:00	5.21333	185.587	5.99333	203.94	8.32	122.693	8.57	13.96	-1.28333	895	62.34	44.798
2019-01-21 08:30:00	5.08	8.15333	5.84	8.96	7.88667	129.267	8.13667	17.7533	-1.17	895	61.5933	45.544
2019-01-21 08:45:00	5.64	265.42	6.49333	291.667	8.72667	20.21	8.53333	16.0733	-0.853333	895	60.05	47.846
2019-01-21 09:00:00	5.92	267.48	6.81333	293.933	9.31333	18.33	9.21333	17.3867	-0.506667	895.4	58.51	48.0327
2019-01-21 09:15:00	5.72	90.5033	6.58333	99.4533	9.37	4.78667	9.38267	16.7133	0.173333	896.067	57.22	45.79
2019-01-21 09:30:00	5.722	269.722	6.576	296.4	9.118	3.702	9.242	18.878	0.494	897	55.852	44.8947
2019-01-21 09:45:00	5.46133	96.18	6.286	105.687	8.8	3.57533	8.74133	6.77733	1.172	897.067	53.5373	38.3027
2019-01-21 10:00:00	4.74667	304.543	5.46333	334.667	7.87667	239.24	7.83	19.3833	1.92667	898	51	35.868
2019-01-21 10:15:00	4.79333	2.75	5.52333	3.01333	7.83667	116.2	7.67667	10.1033	1.93333	898	50.76	35.2713
2019-01-21 10:30:00	5.18	217.77	5.96333	239.307	8.54333	126.447	8.38333	16.2167	2.67333	898	48.4733	32.7787
2019-01-21 10:45:00	5.24	13.62	6.03	14.96	8.74	10.72	8.58	17.85	3.73	898	45.32	26.6627
2019-01-21 11:00:00	5.05333	209.887	5.80733	230.64	8.23867	17.152	8.104	10.8567	3.68067	898.4	45.1747	20.24
2019-01-21 11:15:00	4.84	296.967	5.57667	326.333	8.03	17.5833	7.95	19.1467	3.90333	899	44.0067	16.3407
2019-01-21 11:30:00	4.82667	295.327	5.56333	324.533	7.89	25.3633	7.806	18.5933	3.66333	898.6	44.1867	15.3387
2019-01-21 11:45:00	4.55	18.0067	5.23333	19.78	7.53	9.98333	7.4	17.1833	4.12	898	42.82	11.252
2019-01-21 12:00:00	4.60333	214.82	5.3	236.06	6.85667	25.97	6.70667	15.8233	4.22	898	41.92	10.326
2019-01-21 12:15:00	4.12667	217.237	4.74667	238.717	6.18667	21.8867	5.69333	34.7633	4.63333	898	41.1633	7.908
2019-01-21 12:30:00	4.1	14.7433	4.72	16.1967	5.89333	15.76	5.65333	24.1567	4.53333	898	40.5567	6.666
2019-01-21 12:45:00	4.05333	319.77	4.66667	351.4	5.60667	20.2167	5.49333	15.76	4.83	897.267	39.3133	7.36933
2019-01-21 13:00:00	4.36667	127.95	5.02667	140.607	6.64	16.57	6.54667	22.18	5.65	897	37.4867	11.4827
2019-01-21 13:15:00	4.28	35.05	4.93333	38.51	6.78667	21.9833	6.62333	25.3133	6.21333	897	36.4733	9.71467
2019-01-21 13:30:00	3.48	27.41	4	30.11	5.55333	30.0833	5.22333	27.16	7.04	897	34.7133	5.308
2019-01-21 13:45:00	3.412	108.974	3.926	119.752	5.468	27.032	4.394	30.318	7.506	897	33.726	3.338
2019-01-21 14:00:00	3.65333	100.37	4.20333	110.3	5.78667	27.8267	5.24333	34.7233	7.96333	897	32.95	2.79333
2019-01-21 14:15:00	3.96667	25.9133	4.56	28.4667	6.03	23.08	5.71333	28.8633	8.39667	897	32.06	3.996
2019-01-21 14:30:00	4.2	41.444	4.836	45.534	6.916	18.86	6.666	27.428	8.952	897	30.77	7.16933
2019-01-21 14:45:00	4.10667	11.3767	4.73333	12.5033	6.75	14.36	6.37333	9.64333	9.43333	896.933	29.52	6.07933
2019-01-21 15:00:00	3.56	12.8433	4.09333	14.1033	6.01	16.7133	5.72667	22.8967	9.97333	896	28.7667	5.13333
2019-01-21 15:15:00	3.24	0.05	3.73	0.05	5.48	31.88	5.2	28.94	9.94	896	28.27	2.426
2019-01-21 15:30:00	3.14667	15.82	3.62	17.3733	4.61333	1.07	4.52333	4.6	9.16	896	28.8367	2.97067
2019-01-21 15:45:00	3.782	102.264	4.346	112.372	5.164	331.74	4.792	266.278	8.572	896	29.24	4.622
2019-01-21 16:00:00	3.87	110.813	4.45	121.773	5.96	134.513	5.9	233.463	9.21333	896	27.5933	4.406
2019-01-21 16:15:00	3.45333	187.817	3.97333	206.383	6.09667	132.353	6.05333	130.42	9.86333	896	26.2933	3.736
2019-01-21 16:30:00	3.44667	31.65	3.96	34.77	5.85667	348.467	5.70667	351.5	9.96333	896	26.1	3.09067
2019-01-21 16:45:00	3.33333	299.783	3.84667	329.433	5.62	335.467	5.4	119.06	10.0233	896	25.9133	0.860667
2019-01-21 17:00:00	2.86667	98.55	3.3	108.3	4.63333	120.613	4.64	123.373	9.75667	896	26.0133	0.187333
2019-01-21 17:15:00	2.35	33.72	2.70667	37.0567	3.87667	338.8	3.74	335.7	9.13667	896	27.202	0
2019-01-21 17:30:00	1.85667	20.0933	2.14667	22.0833	3.02333	330.067	3.15333	329.833	8.37667	896	27.7033	0
2019-01-21 17:45:00	1.10667	115.523	1.28667	126.94	2.02333	326.567	2.02333	227.647	7.47	895.933	28.99	0
2019-01-21 18:00:00	1.88	315.177	2.16667	346.333	2.99667	323.7	2.83667	234.047	7.07667	895	29.7967	0.194
2019-01-21 18:15:00	2.01333	314.86	2.31667	346	3.8	342.567	3.55333	352.367	6.3	894.933	32.0767	0.585333
2019-01-21 18:30:00	1.9	316.013	2.18333	347.267	3.77333	340.5	4.04667	350.233	5.90667	894	32.63	0.094667
2019-01-21 18:45:00	1.14	235.12	1.32333	258.363	2.26333	347.4	2.78	356.407	5.96	894	32.41	0
2019-01-21 19:00:00	0.82	71.62	0.943333	78.694	1.63667	341.333	2.23333	349.033	5.844	894	32.474	0
2019-01-21 19:15:00	0.43	71.596	0.51	78.67	0.85	347.9	1.46	350.5	5.92	894	32.2	0
2019-01-21 19:30:00	0.813333	24.82	0.94	27.2733	1.61333	354	1.61333	348.367	5.52	894	33.0333	0
[truncated: 68,177 more rows]
