# Supplementary material
Source: PeerJ journal article supplement (doi:10.7717/peerj-cs.3610)
Supplement: Wind_farm_site_5_Nominal_capacity36MW.xlsx [file Wind_farm_site_5_Nominal_capacity36MW.xlsx]

## Sheet: sheet 1
Time(year-month-day h:m:s)	Wind speed at height of 10 meters (m/s)	Wind direction at height of 10 meters (˚)	Wind speed at height of 30 meters (m/s)	Wind direction at height of 30 meters (˚)	Wind speed at height of 50 meters (m/s)	Wind direction at height of 50 meters (˚)	Wind speed - at the height of wheel hub (m/s)	Wind speed - at the height of wheel hub (˚)	Air temperature (°C)	Power (MW)
2019-01-01 11:00:00	0	81.28	0	26.56	0	26.9067	4.60667	28.6667	-0.04	2.66933
2019-01-01 11:15:00	0	304.793	0	99.6	0	100.9	4.13333	30	-0.12	1.94733
2019-01-01 11:30:00	0.08	302.153	0	99.5333	0	100.9	3.94667	12.2667	-0.046667	1.16333
2019-01-01 11:45:00	0.613333	282.587	0	99.5	0	100.9	4.07333	56.4667	0.233333	0.756667
2019-01-01 12:00:00	0.32	274.607	0	99.54	0	100.9	4	53.6	0.5	0.928
2019-01-01 12:15:00	0.4	273.513	0	99.6	0	100.893	3.78	29.0667	0.64	0.587333
2019-01-01 12:30:00	0.48	267.913	0	99.66	0	100.747	4.06	31.3333	0.966667	0.667333
2019-01-01 12:45:00	0.813333	268.847	0.693333	102.093	0	100.26	4.14667	169.133	0.993333	0.700667
2019-01-01 13:00:00	0.666667	279.433	1.39333	108.087	0	93.64	4.02	279.867	1.44	0.937333
2019-01-01 13:15:00	0	279.427	0.24	108.007	0	91.6	4.06	210.4	1	1.062
2019-01-01 13:30:00	1.17333	255.787	3.29333	99.4533	2.12667	88.2867	3.84667	189.933	1.49333	0.948
2019-01-01 13:45:00	1.15333	285.287	1.98	98.3667	4.07333	77.2867	3.89333	212.533	2.04667	1.012
2019-01-01 14:00:00	0.886667	267.72	0.786667	108.453	4.71333	84.8733	3.98667	145.2	2.18667	0.754
2019-01-01 14:15:00	2.42667	269.747	2.2	112.333	3.94	93.1267	3.59333	191.667	2.39333	0.449333
2019-01-01 14:30:00	0.966667	280.753	1.36667	109.293	3.61333	81.28	3.04667	187.333	2.36	0.151333
2019-01-01 14:45:00	0.293333	277.96	0.906667	101.473	2.71333	80.26	2.19333	118.467	2.22667	0.066
2019-01-01 15:00:00	0.186667	255.493	0.073333	113.42	3.88667	92.4733	2.76667	211.333	2.43333	0.054
2019-01-01 15:15:00	0.833333	266.56	0.733333	103.013	4.5	88.3933	3.18667	165.733	2.85333	0.212
2019-01-01 15:30:00	0.88	251.473	0.693333	126.987	3.68	105.067	3.2	145.933	2.69333	0.448667
2019-01-01 15:45:00	0.373333	250.687	0.473333	118.167	5.04	82.0933	3.54	165.733	3.28667	0.314
2019-01-01 16:00:00	0	237.747	0	111.227	5.46	86.26	4.52667	123.333	2.12	2.00067
2019-01-01 16:15:00	0	280.487	0	107.907	3.62	78.5667	3.26667	211.133	1.92	0.43
2019-01-01 16:30:00	0	236.453	0	108.533	5.08667	79.7133	4.27333	281.133	1.84	0.196667
2019-01-01 16:45:00	0	223.44	0	107.373	4.87333	80.1933	4.16	214.6	1.56	0.245333
2019-01-01 17:00:00	0	227.113	0	104.827	4.66	79.9667	4.15333	98.8	1.39333	0.570667
2019-01-01 17:15:00	0	263.12	0	109.26	4.23333	87.3933	3.82	53.6667	1.31333	0.578667
2019-01-01 17:30:00	0	287.973	0	109.02	4.55333	85.1933	3.81333	6.46667	1.16667	0.698667
2019-01-01 17:45:00	0	289.5	0	102.147	4.07333	77.2533	3.8	190.533	1.00667	0.530667
2019-01-01 18:00:00	0	279.14	0	105.647	4.28667	80.1533	3.91333	26.3333	0.766667	0.738
2019-01-01 18:15:00	0	279.56	0	103.333	3.96	82.5733	3.82667	6.53333	0.613333	0.456667
2019-01-01 18:30:00	0	275.093	0	112.04	3.64	87.9733	3.44667	12.3333	0.546667	0.208667
2019-01-01 18:45:00	0	246.58	0	113.7	3.63333	92.14	3.12	36	0.5	0.088
2019-01-01 19:00:00	0	265.073	0	120.373	3.58	98.2333	3.2	6.33333	0.486667	0.154667
2019-01-01 19:15:00	0	272.687	0.206667	121.007	2.70667	99.8267	3.13333	8.2	0.4	0.207333
2019-01-01 19:30:00	0	260.667	0	120.967	2.80667	102.553	3.31333	6.93333	0.446667	0.184667
2019-01-01 19:45:00	0	253.913	0	125.127	2.98	105.213	3.22	7.2	0.5	0.122667
2019-01-01 20:00:00	0	258.973	0	126.647	2.98667	105.54	3.11333	7.46667	0.506667	0.039333
2019-01-01 20:15:00	0	260.733	0.073333	129.54	2.87333	109.26	3.08667	10.9333	0.506667	0
2019-01-01 20:30:00	0	253.593	0.413333	128.973	2.21333	108.353	2.68	10.6	0.58	0
2019-01-01 20:45:00	0.08	261	0.206667	129.627	2.10667	108.453	2.64667	193.133	0.506667	0.005333
2019-01-01 21:00:00	0	262.433	0	125.247	2.42667	103.493	2.64667	307.133	0.466667	0.058667
2019-01-01 21:15:00	0	259.28	0.073333	127.467	2.69333	107.4	3.03333	192.267	0.4	0.094667
2019-01-01 21:30:00	0	265.787	0.44	130.647	2.10667	108.393	2.81333	329.267	0.4	0
2019-01-01 21:45:00	0.16	250.273	0.293333	136.187	1.94667	110.627	2.4	29.6	0.453333	0
2019-01-01 22:00:00	0	252.333	0	132.807	2.42667	109.867	2.71333	75.2	0.5	0
2019-01-01 22:15:00	0.08	260.513	0.073333	130.227	2.10667	108.093	2.58667	190.6	0.466667	0
2019-01-01 22:30:00	0.08	262.293	0.22	128.693	2.05333	105.14	2.7	193	0.4	0
2019-01-01 22:45:00	0	257.16	0.146667	135.473	2.48	107.313	2.68667	28.7333	0.4	0
2019-01-01 23:00:00	0.08	256.633	0.353333	132.18	1.84	108.233	2.23333	167.6	0.453333	0
2019-01-01 23:15:00	0.08	257.2	0.513333	129.8	0.906667	107.873	1.56	11.1333	0.513333	0
2019-01-01 23:30:00	0	249.76	0	133.447	0	106.473	1.47333	27.9333	0.56	0
2019-01-01 23:45:00	0	249.767	0	133.633	0	97.5067	1.45333	18.5333	0.606667	0
2019-01-02	0	249.8	0	133.6	0	101.273	1.56	27.6667	0.7	0
2019-01-02 00:15:00	0	255.947	0.146667	133.66	1.38667	108.273	2.13333	13.1333	0.54	0
2019-01-02 00:30:00	0	257.7	0.426667	133.267	1.2	108.173	1.98	328.933	0.42	0
2019-01-02 00:45:00	0.08	263.92	0.22	128.4	1.04	104.6	1.70667	344.667	0.446667	0
2019-01-02 01:00:00	0	272.16	0	128.4	0.24	104.34	0.593333	73.6	0.44	0
2019-01-02 01:15:00	0	272.853	0	128.44	0	102.267	0.64	16.8	0.486667	0
2019-01-02 01:30:00	0.08	267.853	0	128.4	0	93.56	0.646667	333	0.413333	0
2019-01-02 01:45:00	0	266.527	0	128.4	0.56	93.8267	0.786667	320.6	0.38	0
2019-01-02 02:00:00	0.24	267.967	0	128.28	1.01333	94.1	1.30667	318.333	0.3	0
2019-01-02 02:15:00	0	265.507	0	127.98	1.73333	98.1467	2.54	345.667	0.226667	0
2019-01-02 02:30:00	0.08	266.68	0.293333	118.487	1.78667	100.54	2.71333	144.733	0.113333	0
2019-01-02 02:45:00	0.08	263.34	0.366667	127.133	1.84	110.633	2.55333	122.267	0.1	0
2019-01-02 03:00:00	0	256.92	0.146667	145.307	1.78667	120.16	1.98	123.6	0.1	0
2019-01-02 03:15:00	0	215.993	0.28	167.2	1.68	137.927	2.35333	23.8	0.166667	0
2019-01-02 03:30:00	0	217.327	0.366667	173.093	1.57333	146.5	2.08	26	0.08	0
2019-01-02 03:45:00	0	181.6	0	206.107	0.32	177.847	1.91333	62.5333	0.146667	0
2019-01-02 04:00:00	0	122.967	0	261.713	0	210.793	2.02667	61.9333	0.033333	0
2019-01-02 04:15:00	0	139.207	0	235.793	0.16	195.913	2.56	191.6	0.053333	0
2019-01-02 04:30:00	0	140.4	0	210.427	0.72	180.373	2.40667	344.8	0.033333	0
2019-01-02 04:45:00	0.08	189.66	0	177.113	0.24	160.493	2.33333	337.133	0.026667	0
2019-01-02 05:00:00	0	214.1	0	166.8	0	160.353	1.8	328.067	0	0
2019-01-02 05:15:00	0	214.1	0	182.7	0.4	161.52	2.43333	342.933	0	0
2019-01-02 05:30:00	0	207.393	0.426667	187.08	0.96	172.54	2.26667	144.333	0	0
2019-01-02 05:45:00	0	199.467	0.146667	196.06	0.933333	172.293	2.26667	186.6	0	0
2019-01-02 06:00:00	0.08	206.387	0.206667	187.3	1.57333	164.94	2.40667	343.267	0	0
2019-01-02 06:15:00	0	208.867	0.073333	183.833	1.30667	156.287	2.73333	163.267	0	0
2019-01-02 06:30:00	0.08	206.347	0	188.02	1.46667	163.567	2.24667	55.1333	0	0
2019-01-02 06:45:00	0.16	193.6	0.073333	189.507	1.41333	167.9	2.44667	53.7333	0	0
2019-01-02 07:00:00	0.08	169.573	0	208.98	0.506667	175.1	2.19333	284.4	0	0
2019-01-02 07:15:00	0.08	212.593	0.146667	183.407	1.28	162.42	2.50667	212.2	0	0
2019-01-02 07:30:00	0	225.46	0.073333	169.62	0.96	157.007	2.53333	40.4667	-0.02	0
2019-01-02 07:45:00	0	228.26	0	159.633	0.88	144.653	2.33333	98.5333	-0.013333	0
2019-01-02 08:00:00	0	243.273	0	136.373	1.22667	133.72	2.41333	52.2667	-0.006667	0
2019-01-02 08:15:00	0	260.813	0	151.267	0.426667	143.46	2.22667	126.667	-0.02	0
2019-01-02 08:30:00	0	249.773	0	142.147	0.293333	132.313	2.42667	235.333	0	0
2019-01-02 08:45:00	0	251.207	0	153.407	1.06667	146.24	2.86	80.7333	0	0
2019-01-02 09:00:00	0	230.66	0.073333	160.227	1.30667	150.547	2.76	168.933	0	0
2019-01-02 09:15:00	0.08	219.853	0	162.847	0.88	149.973	2.37333	99.5333	-0.006667	0
2019-01-02 09:30:00	0.16	223.207	0	169.62	1.65333	153.08	2.4	77.4667	-0.053333	0.020667
2019-01-02 09:45:00	0	254.033	0	138.647	0.56	128.127	2.22667	125.533	0.013333	0.072667
2019-01-02 10:00:00	0	248.467	0	123.02	0	107.28	2.9	261.6	0.1	0.063333
2019-01-02 10:15:00	0	250.64	0	116.607	0	113.047	2.64667	190.8	0.16	0.077333
2019-01-02 10:30:00	0	240.887	0	137.04	0.133333	123.467	2.14	37.0667	0.16	0.017333
2019-01-02 10:45:00	0	222.193	0.073333	160.007	0.08	153.827	2.04667	27.6	0.086667	0
2019-01-02 11:00:00	0	197.993	0	182.067	0.64	161.967	1.99333	27.4	0.28	0
2019-01-02 11:15:00	0.08	203.513	0	182.367	0.24	157.927	2.06667	41.3333	0.406667	0
2019-01-02 11:30:00	0	204.013	0.073333	181.153	0	150.787	1.04	123.267	0.5	0
2019-01-02 11:45:00	0.08	228.66	0	166.467	0	141.387	1.13333	106.467	0.533333	0
2019-01-02 12:00:00	0	225.04	0	156.947	0.08	139.553	1.2	190.933	0.64	0
2019-01-02 12:15:00	0.08	228.973	0.073333	139.987	0.08	130.38	1.16667	165.6	0.593333	0
2019-01-02 12:30:00	0.16	270.72	0	132.353	0	131.273	1.22	252.733	0.593333	0
2019-01-02 12:45:00	0	261.66	0	130.173	0	112.12	0.76	145.467	0.666667	0
2019-01-02 13:00:00	0	230.42	0	145.573	0	126.267	1.12	185.333	0.64	0
2019-01-02 13:15:00	0	272.567	0	76.76	0.08	105.927	1.14	151.8	0.72	0
2019-01-02 13:30:00	0	271.073	0	106.487	0.08	96.56	1.06667	205.733	0.593333	0
2019-01-02 13:45:00	0	277.1	0	115.607	0.16	108.48	1.18667	312.333	0.486667	0
2019-01-02 14:00:00	0.08	263.253	0.073333	116.067	0.773333	104.853	1.36	247.067	0.673333	0
2019-01-02 14:15:00	0.08	245.72	0.366667	125.067	0.666667	106.66	1.88667	326.2	0.686667	0
2019-01-02 14:30:00	0.08	259.393	0.146667	120.787	0.933333	107.127	2.35333	325.267	0.78	0
2019-01-02 14:45:00	0.16	282.86	0.22	107.38	0.96	86.4467	1.90667	318.133	0.793333	0
2019-01-02 15:00:00	0	282.58	0.293333	114.947	2.38667	90.8333	2.87333	274.8	0.786667	0
2019-01-02 15:15:00	0	275.947	0.486667	109.227	2.27333	88.5333	2.36667	212.2	0.973333	0
2019-01-02 15:30:00	0	283.42	0.266667	111.88	2.37333	87.98	2.44667	145.133	0.833333	0
2019-01-02 15:45:00	0.08	252.253	0.146667	115.327	3.22667	87.28	3.02	213.8	0.8	0
2019-01-02 16:00:00	0.08	285.12	0	120.34	3.56667	94.6533	3.40667	304.933	0.82	0.114667
2019-01-02 16:15:00	0.08	280.38	0.073333	116.96	3.51333	94.5267	3.38	305.467	0.926667	0.123333
2019-01-02 16:30:00	0	266.767	0.073333	122.6	3.34	93.7333	3.24667	306.867	0.906667	0.054667
2019-01-02 16:45:00	0	260.073	0	125.067	3.28	102.333	3.46667	237.2	0.9	0.048
2019-01-02 17:00:00	0	272.52	0	128.173	2.86667	104.507	3.11333	214.467	0.886667	0
2019-01-02 17:15:00	0	267.36	0.073333	120.267	2.64	96.68	3.18667	261.2	0.82	0
2019-01-02 17:30:00	0	262.027	0	115.38	2.92667	96.4467	2.88	352.133	0.8	0
2019-01-03 12:00:00	0	284.007	0	105.6	0	68.2467	1.84	256.4	0.88	0
2019-01-03 12:15:00	0	285.76	0	88.2467	0.56	60.42	2.6	319.133	0.933333	0
2019-01-03 12:30:00	0.08	291.2	0.073333	81.2	1.55333	61.6667	2.22667	193.133	1.12	0
2019-01-03 12:45:00	0.133333	288.407	0.146667	99.2467	0.986667	76.08	2.32	26.7333	1.48667	0
2019-01-03 13:00:00	0.12	306.22	0	97.21	0.64	73.39	2.47	23.8	1.56	0
2019-01-03 13:15:00	0	310.74	0	84.88	0	55.2133	2.67333	107.067	1.73333	0
2019-01-03 13:30:00	0	266.66	0.146667	97.9867	0.48	61.3067	2.53333	100.067	1.72	0
2019-01-03 13:45:00	0	306.02	0.146667	96.88	2	57.8667	2.52667	233	1.74	0
2019-01-03 14:00:00	0.08	306.547	0.293333	88.82	2.10667	54.8	2.86667	184.867	1.74667	0
2019-01-03 14:15:00	0.12	321.1	0.33	67.34	2.49	38.65	2.65	179.5	1.75	0
2019-01-03 14:30:00	0.16	328.473	0.22	61.1867	2.61333	37.5267	2.91333	144.2	1.75333	0
2019-01-03 14:45:00	0	278.607	0.073333	69	2.23333	35.6133	3.1	191.133	1.82	0
2019-01-03 15:00:00	0.08	295.7	0.22	61.7067	2.50667	32	3.04667	167.267	1.88	0
2019-01-03 15:15:00	0.08	224.4	0.266667	51.4267	2.36667	20.48	2.84	258.2	1.85333	0
2019-01-03 15:30:00	0	234.213	0	64.1733	3.23333	37.9467	3.38667	236.8	1.80667	0.096667
2019-01-03 15:45:00	0	318.62	0	61.2	3.44667	17.56	3.74667	330.6	1.65333	0.487333
2019-01-03 16:00:00	0	260.773	0	39.0467	3	18.0267	3.6	354.133	1.62667	0.948667
2019-01-03 16:15:00	0	293.247	0	44.2067	3.62667	13.86	3.48667	191.333	1.55333	0.564
2019-01-03 16:30:00	0	253.427	0.22	38.9133	3.39333	13.5333	3.47333	236.533	1.52667	0.316667
2019-01-03 16:45:00	0.16	228.733	0.073333	40.58	3.84667	8.64	3.92	212.667	1.49333	0.897333
2019-01-03 17:00:00	0	192.26	0	32.5133	3.56	6.85333	4.06	348.067	1.43333	1.15
2019-01-03 17:15:00	0	169.667	0	40.9	3.10667	167.407	4.23333	48.8667	1.39333	1.57333
2019-01-03 17:30:00	0	127.413	0	16.8333	3.84667	259.507	4.42667	145.333	1.27333	2.452
2019-01-03 17:45:00	0	123.113	0	20.7933	4.44	118.54	4.54667	8.26667	1.23333	2.656
2019-01-03 18:00:00	0	57.0267	0	19.96	5.46	96.42	5.08667	6.4	1.16667	3.73067
2019-01-03 18:15:00	0	56.76	0	17.9	5.35333	122.113	5.4	5.66667	1.1	4.812
2019-01-03 18:30:00	0	345.44	0	33.2467	3.83333	8.2	4.94	10.6	1.12667	5.716
2019-01-04 09:45:00	0	233.407	0	30.0867	5.94667	28.5867	7.00667	353.2	2.52	6.35
2019-01-04 10:00:00	0	169.193	0.133333	46.6267	4.59333	188.947	5.97333	346.4	2.68667	4.87133
2019-01-04 10:15:00	0	150.373	0.146667	108.1	4.32	256.373	5.31333	346.6	2.92	3.71067
2019-01-04 10:30:00	0.08	183.14	0	21.2267	4.49333	103.28	5.58667	302.267	3.24	4.56933
2019-01-04 10:45:00	0	145.113	0	49.5	5.08	75.9333	6.25333	348.6	3.47333	7.29733
2019-01-04 11:00:00	0	79.2	0	43.6667	4.76	124.387	5.4	323.2	3.56	6.982
2019-01-04 11:15:00	0	66.24	0	61.5333	5.14	215.8	5.12667	326	3.58667	6.10067
2019-01-04 11:30:00	0.133333	150.227	0	104.167	4.12	254.407	4.67333	165.8	3.78667	4.23533
2019-01-04 11:45:00	0.506667	29.7267	0.22	193.947	4.60667	293.54	4.99333	238	3.81333	2.93133
2019-01-04 12:00:00	1.09333	26.4867	1.04	168.193	4.33333	339.013	4.58667	236.333	4.38	2.68933
2019-01-04 12:15:00	1.36	71.0467	1.15333	162.493	4.92667	317.96	5.36	303.2	4.49333	3.16
2019-01-04 12:30:00	1.04	86.8133	1.38667	84.7933	4.33333	230.22	4.66	193.667	4.81333	4.11467
2019-01-04 12:45:00	1.01333	218.513	1.22	91.3467	4.22667	142.353	4.04	236.533	5.52667	2.916
2019-01-04 13:00:00	1.42	135.367	1.03333	134.367	3.61333	192.313	3.66	283.733	5.63333	2.464
2019-01-04 13:15:00	1.46667	204.193	1.35333	56.7467	3.44	91.6867	3.75333	191.8	5.93333	1.75
2019-01-04 13:30:00	1.62667	297.14	1.46667	47.7467	4	45.08	4.1	166.933	5.93333	0.933333
2019-01-04 13:45:00	0.933333	230.413	0.973333	55.9267	3.56	47.6933	3.26667	257.333	6.18667	1.51133
2019-01-04 14:00:00	0.4	269.72	0.34	70.2133	3.55333	69.4933	3.42	213.267	6.28	0.578
2019-01-04 14:15:00	0.32	276.76	0.22	60.24	2.83333	62.6	2.44667	255.667	6.15333	0.464667
2019-01-04 14:30:00	0	246.893	0	72.4133	2.48667	62.6067	2.54	187.333	6.05333	0.02
2019-01-04 14:45:00	0.32	74.84	0.206667	196.98	2.08667	253.273	1.90667	233.733	6.32	0
2019-01-04 15:00:00	0.08	120	0	187.047	1.93333	143.793	1.10667	149.133	6.34667	0
2019-01-04 15:15:00	0.24	333.667	0.293333	48.04	3.20667	26.8733	2.76667	98.8667	6.34	0
2019-01-04 15:30:00	0.24	317.027	0.48	61.78	2.65333	55.8733	2.27333	257.067	6.61333	0
2019-01-04 15:45:00	0.293333	165.867	0.293333	30.96	2.54667	84.3133	2.46667	248.533	6.72	0
2019-01-04 16:00:00	0	177.533	0.146667	136.24	2.84667	145.907	2.62	78.8667	6.42	0
2019-01-04 16:15:00	0	269.547	0.073333	51.1467	3.45333	68.4267	3.01333	261.067	6.12	0.003333
2019-01-04 16:30:00	0	311.293	0	60.9533	3.38	29.78	3.20667	306.2	5.86667	0.134
2019-01-04 16:45:00	0	312.187	0	68.0333	3	41.1333	2.72667	236.2	5.78	0
2019-01-04 17:00:00	0	301.987	0.073333	73.9733	3.56	41.8733	3.05333	165.867	5.70667	0.146667
2019-01-04 17:15:00	0.16	315.96	0.22	53.4867	2.43333	28.5267	2.56667	257.333	5.59333	0.164
2019-01-04 17:30:00	0.08	328.66	0.073333	46.9467	2.76	21.64	2.92667	121.533	5.56	0.236
2019-01-04 17:45:00	0.08	324.253	0	57.4133	4.28	28.7467	4.12	191.333	5.39333	0.732667
2019-01-04 18:00:00	0	302.18	0	70.58	4.5	45.3	4.40667	12.7333	5.20667	1.872
2019-01-04 18:15:00	0	293.413	0	68.28	4.87333	45.0067	4.73333	103.867	4.99333	2.35533
2019-01-04 18:30:00	0	293	0	71.7733	4.92667	43.5333	4.42	260.667	4.86	3.14
2019-01-04 18:45:00	0	302.107	0	73.9	5.24667	44.7667	4.61333	306.867	4.84667	2.892
2019-01-04 19:00:00	0	269.733	0	97.2867	4.34	68.1733	4.26	192.667	4.72667	2.324
2019-01-04 19:15:00	0	226.78	0	113.673	5.19333	88.0133	4.69333	345.6	4.02667	2.004
2019-01-04 19:30:00	0	307.633	0	109.213	4.76667	82.9933	4.38667	142.8	3.72667	1.50133
2019-01-04 19:45:00	0	275.933	0	106.607	4.55333	81.0067	4.34	261.4	3.5	0.996667
2019-01-04 20:00:00	0	270.667	0	110.78	4.28667	84.34	3.82667	3.8	3.49333	0.976667
2019-01-04 20:15:00	0	262.78	0	115.933	4.28667	90.8933	4.03333	7.73333	3.4	1.14733
2019-01-04 20:30:00	0	238.06	0	118.64	4.87333	94.32	4.40667	13.4667	3.34667	1.24067
2019-01-04 20:45:00	0	157.627	0	117.727	4.98	92.54	4.76667	13.2667	3.3	1.366
2019-01-04 21:00:00	0	247.067	0	117.26	5.14	95.88	4.96	241.467	3.38667	2.17867
2019-01-04 21:15:00	0	245.2	0	118.347	4.60667	95.2733	4.18667	308.533	3.32667	1.50467
2019-01-04 21:30:00	0	252.347	0	117.993	4.23333	93.1133	3.66667	307.6	3.26667	0.769333
2019-01-04 21:45:00	0	264.733	0	122.1	4.00667	96.92	3.34667	74.5333	3.24667	0.504667
2019-01-04 22:00:00	0	260.973	0	121.24	3.86	94.4867	3.25333	11.8	3.29333	0.65
2019-01-04 22:15:00	0	262.947	0	124.927	3.90667	103.167	3.86667	14.8	3.19333	1.36867
2019-01-04 22:30:00	0	255.047	0	114.833	4.07333	94.74	3.91333	27.4	3.00667	1.664
2019-01-04 22:45:00	0	260.073	0	114.827	4.60667	95.7467	4.44667	7.13333	2.84	2.22667
2019-01-04 23:00:00	0	278.713	0	117.027	4.28667	95.0933	4.01333	5.73333	2.74667	1.61467
2019-01-04 23:15:00	0	270.713	0	122.1	3.64	99.5333	3.62	10.1333	2.77333	1.184
2019-01-04 23:30:00	0	262.66	0	120.52	3.91333	98.86	3.85333	13.2	2.78667	1.214
2019-01-04 23:45:00	0	262.267	0	121.613	3.68667	100.793	3.84667	13.6667	2.8	1.78133
2019-01-05	0	267.987	0	116.067	3.80667	95.5733	3.78667	10.3333	2.72667	1.93467
2019-01-05 00:15:00	0	265.6	0	111.487	4.18	94.5733	4.20667	8.33333	2.55333	1.976
2019-01-05 00:30:00	0	267.447	0	111.24	4.34	86.7267	4.07333	29.4	2.36667	1.616
2019-01-05 00:45:00	0	258.047	0	111.293	4.07333	88	3.96667	5.2	2.32667	0.902667
2019-01-05 01:00:00	0	260.293	0	112.273	4.34	90.64	3.96667	8.73333	2.33333	1.05
2019-01-05 01:15:00	0	258.96	0	121.4	4.18	99.4733	4.2	151.067	2.29333	1.16667
2019-01-05 01:30:00	0	256.553	0.606667	123.933	3.51333	101.167	3.41333	121.933	2.25333	0.304667
2019-01-05 01:45:00	0	252.467	0.94	121.533	2.93333	91.94	3.12	262.2	2.13333	0.084
2019-01-05 02:00:00	0.08	291.747	0.22	100.913	1.68	68.0867	2.02667	327.067	2.15333	0
2019-01-05 02:15:00	0	345.5	0	100.113	0.693333	37.6067	1.17333	126.733	2.38	0
2019-01-05 02:30:00	0.453333	325.62	0.146667	81.5133	1.33333	66.9467	2.52	38.8667	2.44667	0
2019-01-05 02:45:00	0.16	300.893	0.44	97.16	2.37333	77.58	2.52667	85.4667	2.32667	0
2019-01-05 03:00:00	0.213333	309.113	0	81.4	1.84	67.7667	2.28	93.7333	2.44	0
2019-01-05 03:15:00	0.4	313.607	0	69.9467	1.28	80.08	1.24667	86.6	2.58667	0
2019-01-05 03:30:00	0.453333	320.707	0	69.6267	1.04	55.72	0.6	114.933	2.66667	0
2019-01-05 03:45:00	0.8	339.093	0	49.2067	0	42.12	0.393333	52	2.73333	0
2019-01-05 04:00:00	0.32	338.8	0	47.0533	0.133333	10.3933	0.433333	161.333	2.79333	0
2019-01-05 04:15:00	0	338.8	0	49.4	0	7.9	0.266667	109.667	2.86	0
2019-01-05 04:30:00	0	338.86	0	49.3533	0.16	223.22	0.446667	124.4	2.9	0
2019-01-05 04:45:00	0.16	338.833	0	49.38	0	328.12	0.44	116.667	2.97333	0
2019-01-05 05:00:00	0.8	338.7	0	49.4	0	327.22	0.72	140.8	2.87333	0
2019-01-05 05:15:00	0.8	337.66	0	49.4	0.88	195.693	1.40667	179.467	2.82667	0
2019-01-05 05:30:00	1.17333	323.32	0	49.4333	1.84	22.9133	2.17333	209.667	2.66667	0
2019-01-05 05:45:00	0.746667	316.06	0.073333	61.14	1.84	30.1733	2.56	209.4	2.6	0
2019-01-05 06:00:00	0	310.767	0	66.9733	2.87333	36.0933	2.57333	250.467	2.5	0
2019-01-05 06:15:00	0.08	296.2	0	72.9933	3.28	41.6067	2.75333	232.067	2.35333	0.151333
2019-01-05 06:30:00	0.16	287.74	0.073333	85.7267	2.76667	51.2467	2.25333	255.8	2.34	0
2019-01-05 06:45:00	0.24	287.127	0.146667	86.7667	2.21333	59.3733	1.46	253.667	2.49333	0
2019-01-05 07:00:00	0.08	299.913	0.073333	75.9467	2.48	44.7467	1.50667	34.9333	2.61333	0
2019-01-05 07:15:00	0.16	308.973	0	74.88	2.75333	42.0733	1.82667	183.8	2.70667	0
2019-01-05 07:30:00	0	305.2	0	67.9867	2.82667	39.4533	2.02	299.933	2.70667	0
2019-01-05 07:45:00	0.08	302.087	0.073333	70.6267	2.64667	41.5267	2.43333	162	2.58667	0
2019-01-05 08:00:00	0.08	301.613	0	74.6267	2.21333	47.5467	2.19333	155.4	2.72667	0
2019-01-05 08:15:00	0.08	292.46	0.073333	85.02	2.64	58.6933	1.93333	41.2	2.67333	0
2019-01-05 08:30:00	0	298.75	0	83.94	2.9	59.49	2.41	49	2.26	0
2019-01-05 08:45:00	0	285.26	0	103.14	2.98	76.4333	2.64	84.9333	2.24	0
2019-01-05 09:00:00	0.32	272.187	0.366667	109.747	2.86	91.4733	2.41333	17.5333	2.27333	0
2019-01-05 09:15:00	0.08	267.84	0.22	117.367	3.22	94.0067	2.68667	192.133	2.60667	0
2019-01-05 09:30:00	0.48	268.007	0.146667	119.607	2.42667	102.56	2.10667	57.3333	2.92	0
2019-01-05 09:45:00	0.08	263.4	0.293333	119.947	1.78667	98.6733	2.40667	304.867	3.2	0
2019-01-05 10:00:00	0.08	260.047	0.073333	123.227	2.10667	98.96	2.32667	83.3333	3.35333	0
2019-01-05 10:15:00	0.08	254.467	0.073333	135.1	2.21333	114.087	2.25333	30.2667	3.86	0
2019-01-05 10:30:00	0.08	251.013	0.206667	120.927	2.49333	113.733	2.05333	32.6667	4.23333	0
2019-01-05 10:45:00	0	247.167	0.28	135.287	2.63333	121.633	2.14	61.6667	4.86	0
2019-01-05 11:00:00	0.293333	206.227	0	165.513	3.16667	141.847	3.49333	153.467	4.92667	0.292667
2019-01-05 11:15:00	0.373333	222.807	0.7	159.753	4.17333	140.3	3.68	212.733	4.82667	1.21133
2019-01-05 11:30:00	0.453333	211.427	0.353333	163.96	3.22667	141.513	3.28667	215.6	5.26667	1.18733
2019-01-05 11:45:00	0.08	153.153	0.133333	221.693	2.53333	186.273	2.94667	259.467	4.81333	0.878
2019-01-05 12:00:00	0.08	155.18	0.146667	224.193	2.62	184.833	2.23333	250	5.02	1.24933
2019-01-05 12:15:00	0	106.667	0.146667	269.233	1.57333	221.133	1.90667	128.667	4.92667	0.121333
2019-01-05 12:30:00	0.24	138.233	0.22	236.887	2.21333	210.9	1.81333	144.2	5.30667	0.077333
2019-01-05 12:45:00	0.08	144.487	0.073333	223.073	3.15333	195.487	2.80667	283.6	5.61333	0.422
2019-01-05 13:00:00	0.08	136.66	0.073333	228.207	3.16	199.433	2.90667	165.2	5.81333	0.606
2019-01-05 13:15:00	0.48	178.107	0.5	219.993	2.71333	170.96	2.47333	192.667	6.08	0.738
2019-01-05 13:30:00	0.613333	158.247	0.146667	239.76	3.32	207.26	3.04	215.133	6.34	0.556667
2019-01-05 13:45:00	0	127.52	0	238.467	5.08667	206.013	4.94667	255.8	6.48667	1.66533
2019-01-05 14:00:00	0.08	140.54	0.146667	235.673	4.74667	211.293	4.78667	188.6	6.24	2.43733
2019-01-05 14:15:00	0	127.327	0	254.007	4.16667	226.213	3.67333	235.6	6.35333	1.60267
2019-01-05 14:30:00	0	121.833	0	250.073	4.44	218.46	4.03333	277.933	6.04667	1.96
2019-01-05 14:45:00	0	131.28	0	243.12	4.55333	212.933	3.85333	145.8	6.09333	1.302
2019-01-05 15:00:00	0.08	124.94	0	253.647	3.27333	222.1	3.30667	234.133	6.21333	0.259333
2019-01-05 15:15:00	0.24	112.293	0.206667	250.5	2.38667	214.573	2.74667	280.4	6.35333	0
2019-01-05 15:30:00	0.16	144.047	0.146667	230.26	2.92667	198.147	2.57333	193.333	6.86667	0.003333
2019-01-05 15:45:00	0	111.147	0	265.127	3.05333	236.067	2.51333	97.8	6.20667	0
2019-01-05 16:00:00	0	89.3467	0.073333	294.52	2.70667	264.42	2.37333	279.533	5.77333	0
2019-01-05 16:15:00	0.16	103.927	0.22	274.34	2.10667	252.78	1.61333	26.8667	5.69333	0
2019-01-05 16:30:00	0.213333	104.873	0	277.52	1.46667	253.72	1.60667	106	5.64667	0
2019-01-05 16:45:00	0.48	87.8	0	287.247	0.8	260.413	1.42667	194.333	5.62	0
2019-01-05 17:00:00	0.16	96.1133	0	286.92	0	266.38	0.466667	146.467	5.64667	0
2019-01-05 17:15:00	0	86.2	0	287.42	0	308.413	0.526667	101.667	5.56	0
2019-01-05 17:30:00	0	86.2	0	287.46	0	308.467	0.786667	235.933	5.5	0
2019-01-05 17:45:00	0.16	133.413	0.293333	201.493	2.43333	89.2467	2.86667	205	5.38667	0
2019-01-05 18:00:00	0	283	0	92.8867	4.39333	60.2933	4.06	171.933	4.95333	0.339333
2019-01-05 18:15:00	0	278.48	0	99.1333	4.39333	66.1867	4.2	27.0667	4.77333	1.6
2019-01-05 18:30:00	0	281.287	0	100.953	5.24667	71.2933	4.47333	11.5333	4.69333	1.83733
2019-01-05 18:45:00	0	258.78	0	106.027	4.5	77.4067	4.18667	355.533	4.54	0.880667
2019-01-05 19:00:00	0	266.527	0	105.293	4.07333	75.98	3.78667	355.2	4.48667	0.608
2019-01-05 19:15:00	0	269.127	0	100.72	4.66	74.6333	4.17333	353.6	4.42	1.27467
2019-01-05 19:30:00	0	275.56	0	113.607	4.82	87.4733	3.94	9.2	4.29333	1.082
2019-01-05 19:45:00	0	266.32	0	113.873	4.76667	89.58	4.02667	9.06667	4.27333	1.356
2019-01-05 20:00:00	0	256.92	0	115.727	5.08667	91.9667	4.17333	11.6	4.25333	1.74933
2019-01-05 20:15:00	0	258	0	113.233	4.5	93.16	3.9	215.467	4.28667	1.43667
2019-01-05 20:30:00	0	263.673	0	112.393	3.80667	94.08	3.66	50.7333	4.26	1.354
2019-01-05 20:45:00	0.08	261.753	0	118.4	4.18	100.7	3.86667	8.53333	4.2	1.45667
2019-01-05 21:00:00	0.08	255.247	0	130.68	4.28667	110.713	4.58667	123.867	4.17333	1.68533
2019-01-05 21:15:00	0	259.66	0	130.813	4.28667	108.707	4.3	262.133	4.28667	1.77067
2019-01-05 21:30:00	0	251.893	0	126.98	4.33333	111.487	4.37333	216.667	4.28667	1.716
2019-01-05 21:45:00	0	261.293	0	135.467	4.55333	112.707	4.67333	28.9333	4.28	1.66667
2019-01-05 22:00:00	0	270.727	0	120.173	4.01333	103.833	4.40667	213.6	4.18	1.222
2019-01-05 22:15:00	0	281.973	0	108.673	3.56667	99.7533	4.24667	353.933	4.1	1.196
2019-01-05 22:30:00	0.08	269.913	0	114.72	3.57333	101.24	4.34	215.867	4.02	1.65333
2019-01-05 22:45:00	0	278.253	0	123.453	4.39333	104.34	5.03333	306.533	3.96	2.414
2019-01-05 23:00:00	0	268.18	0	121.5	4.28667	102.287	4.89333	307.4	3.9	2.64933
2019-01-05 23:15:00	0	260.52	0	126.74	4.66	108.51	5.02	181.5	3.9	3.074
2019-01-05 23:30:00	0	264.34	0	125.547	4.66	107.813	5.12667	214.533	3.88	3.63733
2019-01-05 23:45:00	0	268.76	0	129.107	4.60667	109.167	5.11333	145.933	3.79333	3.64667
2019-01-06	0	269.593	0	134.173	4.34	115.927	4.88667	9.26667	3.86	4.238
2019-01-06 00:15:00	0	245.553	0	138.92	4.92667	117.053	4.71333	34.4	4.05333	4.668
2019-01-06 00:30:00	0	263.073	0	135.5	5.03333	114.587	4.69333	6.86667	4.06	4.73
2019-01-06 00:45:00	0	260.08	0	130.24	5.19333	109.167	5.26667	192.2	4.04667	4.358
2019-01-06 01:00:00	0	257.173	0	136.967	4.82	113.34	5.03333	145.667	4	3.60933
2019-01-06 01:15:00	0	255.713	0	129.507	4.60667	108.287	5.16	355.067	3.96667	3.40933
2019-01-06 01:30:00	0	270.4	0	121.127	4.76667	99.4867	5.20667	349.6	3.81333	3.96467
2019-01-06 01:45:00	0	260.087	0	121.067	4.98	100.12	5.29333	348.267	3.7	4.14067
2019-01-06 02:00:00	0	264.68	0	121.173	5.40667	102.193	5.50667	351.467	3.66	4.77867
2019-01-06 02:15:00	0	265.767	0	120.613	5.19333	99.6333	5.59333	349	3.56667	5.39933
2019-01-06 02:30:00	0	259.913	0	116.327	5.08667	97.72	5.58667	347	3.44	4.71267
2019-01-06 02:45:00	0	265.113	0	117.087	4.98	100.167	5.72667	349.533	3.3	5.02733
2019-01-06 03:00:00	0	266.42	0	118.72	4.71333	101.987	5.52	352.2	3.29333	4.65
2019-01-06 03:15:00	0	267.367	0	120.253	4.60667	103.727	5.18	330.933	3.3	3.93867
2019-01-06 03:30:00	0	272.687	0	115.907	4.07333	99.5	4.86667	351.2	3.24667	3.34067
2019-01-06 03:45:00	0	277.067	0	106.327	3.34	94.3933	5	351.267	3.16667	2.94133
2019-01-06 04:00:00	0	274.84	0	108.88	3.96	95.8733	5.10667	348.6	3.2	2.48133
2019-01-06 04:15:00	0	264.8	0	112.153	4.12667	98.5867	4.97333	349.4	3.2	2.39867
2019-01-06 04:30:00	0.08	261.533	0	119.433	3.33333	100.987	4.66667	236.8	3.21333	1.77933
2019-01-06 04:45:00	0.08	253.793	0	133.287	3.84	109.853	4.04	236.533	3.34	1.12
2019-01-06 05:00:00	0.08	251.467	0	135.74	3.28	113.98	3.80667	326.2	3.47333	0.749333
2019-01-06 05:15:00	0	278.22	0.586667	127.96	2.86	104.58	4.07333	342.733	3.28	0.986667
2019-01-06 05:30:00	0	265.58	0.886667	119.6	3.04	102.267	4.42667	117	3.17333	0.842
2019-01-06 05:45:00	0	282.36	0.366667	118.9	2.05333	102.62	3.66	75.4	3.1	0.297333
2019-01-06 06:00:00	0	282.32	0	118.873	1.73333	92.2333	3.20667	168.667	3.2	0.095333
2019-01-06 06:15:00	0	281.787	0	109.82	2.53333	86.1067	3.38	259.6	3.13333	0.062667
2019-01-06 06:30:00	0	281.26	0	99.8333	2.37333	74.7667	3.28	281.667	3.06	0.146667
2019-01-06 06:45:00	0	279.02	0.293333	101.36	2.48667	82.24	3.56667	212	3.1	0.208667
2019-01-06 07:00:00	0	280.847	0.513333	102.18	2.53333	82.32	3.41333	306.267	3.1	0.121333
2019-01-06 07:15:00	0.16	265.88	0.513333	104.947	2.75333	84.6267	3.7	283.467	3.1	0.320667
2019-01-06 07:30:00	0.16	280.8	0.073333	97.1	2.86	73.8267	3.96667	277.933	3	0.486
2019-01-06 07:45:00	0.08	308.893	0.22	79.5267	2.48	62.24	2.87333	144.733	3.11333	0.043333
2019-01-06 08:00:00	0.08	314.62	0.146667	72.3067	2.26667	56.3667	2.55333	145.533	3.22	0
2019-01-06 08:15:00	0.08	309.373	0.146667	74.6267	2.75333	54.12	2.66667	170.6	3.2	0
2019-01-06 08:30:00	0	303.64	0.293333	87.52	2.80667	66.0733	2.92	238.667	3.19333	0
2019-01-06 08:45:00	0.08	311.9	0.073333	70.6867	2.74667	55.9467	3.00667	215.867	3.22	0
2019-01-06 09:00:00	0	312.013	0	61.82	2.81333	49.5733	3.04	259.133	3.26667	0.026
2019-01-06 09:15:00	0	331.007	0.073333	52.3467	2.69333	41.7	2.99333	190.667	3.29333	0
2019-01-06 09:30:00	0	320.14	0	60.0133	3.16	45.88	2.99333	258.2	3.39333	0.044667
2019-01-06 09:45:00	0.32	316.913	0	60.14	2.71333	38.9733	2.78667	303	3.43333	0.132
2019-01-06 10:00:00	0	309.133	0	72.5933	3.67333	37.0067	3.25333	145.6	3.5	0.924667
2019-01-06 10:15:00	0.16	306.14	0.146667	68.4867	3.68667	36.9867	3.63333	55.6667	3.48667	1.69467
2019-01-06 10:30:00	0.16	298.36	0	66.12	3.27333	34.6467	3.74667	7.4	3.44	1.86067
2019-01-06 10:45:00	0	295.627	0	79.1333	3.78667	35.84	3.91333	5.93333	3.41333	1.86267
2019-01-06 11:00:00	0	292.353	0.073333	71.8467	4.00667	40.72	4.06667	9.26667	3.48667	2.09667
2019-01-06 11:15:00	0	296.013	0	72.8133	3.85333	45.8867	4.14	8.8	3.5	2.51867
2019-01-06 11:30:00	0	293.867	0	75.3467	4.12	48.4733	4.38	8.4	3.48667	2.65733
2019-01-06 11:45:00	0	292.14	0	73.56	4.12667	47.3733	4.47333	9.4	3.44	3.42333
2019-01-06 12:00:00	0	269.493	0	84.78	3.95333	49.34	4.64667	8.33333	3.51333	3.422
2019-01-06 12:15:00	0	282.207	0.073333	84.2	4.44667	49.1267	4.58667	32.6	3.56667	3.316
2019-01-06 12:30:00	0	293.093	0	75.18	4.12667	49.7533	4.53333	9.73333	3.51333	3.05733
2019-01-06 12:45:00	0	288.34	0	78.7933	4.00667	52.0267	4.50667	8.13333	3.66667	3.254
2019-01-06 13:00:00	0	309.093	0	75.2867	4.06	51.5267	4.30667	8.66667	3.70667	3.448
2019-01-06 13:15:00	0	296.78	0	75.8067	4.06667	50.1867	4.34667	8.93333	3.67333	3.18533
2019-01-06 13:30:00	0	300.367	0	78.0067	3.74	48.3467	3.99333	10.1333	3.75333	2.10867
2019-01-06 13:45:00	0	301.973	0	73.0533	4.23333	46.08	4.37333	5.93333	3.80667	2.594
2019-01-06 14:00:00	0	303.013	0	65.6733	4.5	38.7	4.04667	215.6	3.90667	2.41733
2019-01-06 14:15:00	0	302.807	0.073333	72.94	3.74	36.0333	4.22667	214.133	3.96	2.68733
2019-01-06 14:30:00	0	313.84	0	77.7	4.06	36.0733	4.27333	260.933	4.04	3.048
2019-01-06 14:45:00	0	316.893	0	55.5267	4.38	32.68	4.53333	350.867	3.97333	3.262
2019-01-06 15:00:00	0	323.1	0	60.8867	4.38667	30.1933	4.57333	327	3.90667	3.11533
2019-01-06 15:15:00	0	314.68	0.073333	57.3333	4.28	33.9333	4.58667	347	3.92667	3.596
2019-01-06 15:30:00	0	279.867	0	55.2667	4.76667	24.8533	4.52	343.4	3.97333	3.36067
2019-01-06 15:45:00	0	322.96	0.22	53.7133	3.29333	34.0467	4.00667	302	4.04667	3.062
2019-01-06 16:00:00	0	328.753	0	48.2733	3.21333	21.12	3.29333	145.533	4.07333	1.87933
2019-01-06 16:15:00	0	314.593	0.073333	63.74	3.5	30.7867	3.65333	8.2	4.09333	2.09667
2019-01-06 16:30:00	0	309.133	0.146667	55.32	3.34	25.26	3.82	190.933	4.01333	2.26467
2019-01-06 16:45:00	0.16	317.853	0	60.1133	3.44	29.8467	3.82667	281.067	3.98667	2.04267
2019-01-06 17:00:00	0	289.2	0	50.6333	3.63333	25.7667	4.3	352.467	3.90667	2.348
2019-01-06 17:15:00	0	221.027	0.353333	40.44	3.66667	15.6133	4.16667	328.933	3.92667	2.26933
2019-01-06 17:30:00	0.08	130.193	0.206667	24.4267	4.5	126.06	4.52667	345.2	3.90667	3.13133
2019-01-06 17:45:00	0	143.307	0	73.7533	4.33333	72.64	4.61333	118.6	3.86667	2.65867
2019-01-06 18:00:00	0	189.487	0	19.1267	4	123.953	4.73333	28.4	3.86	3.16067
2019-01-06 18:15:00	0	168.327	0	36.22	5.14	7.75333	5.24	5.66667	3.8	4.42067
2019-01-06 18:30:00	0	100.66	0	30.2733	4.44	51.7467	4.85333	6.8	3.84667	3.15733
2019-01-06 18:45:00	0.08	164.96	0	28.6267	5.13333	28.5267	5.28667	28.6	3.88	4.24667
2019-01-06 19:00:00	0	121.84	0	26.2467	6.14	49.8333	6.26667	5.66667	3.86	7.306
2019-01-06 19:15:00	0	225.207	0	24.3067	5.46	26.3733	5.82667	4.93333	3.82667	7.918
2019-01-06 19:30:00	0	230.693	0.146667	27.6133	3.50667	53	4.58667	30.5333	3.82	6.464
2019-01-06 19:45:00	0	205.047	0.073333	46.1	3.06	99.9733	4.02667	99.0667	3.74	5.57467
2019-01-06 20:00:00	0	30.7267	0	18.8733	5.63333	167.62	4.95333	279.8	3.75333	4.87933
2019-01-06 20:15:00	0	109.887	0	23.28	6.06	213.84	5.56667	258.6	3.92	5.76933
2019-01-06 20:30:00	0	131.033	0	27.4133	6.18	28.9667	6.5	103.067	4.02	4.64333
2019-01-06 20:45:00	0	311.427	0	41.4667	6.48	17.58	7.38667	239	4.49333	8.414
2019-01-06 21:00:00	0	206.62	0	29.36	6.05333	11.7067	6.69333	330.667	4.11333	8.924
2019-01-06 21:15:00	0	143.82	0	30.1467	6.97333	8.72667	7.38667	328.133	3.89333	7.63667
2019-01-06 21:30:00	0	143.973	0	27.72	7.08	9.5	7.49333	282.8	4.03333	6.99333
2019-01-06 21:45:00	0	39.5467	0	77.44	6.4	348.84	7.07333	144.8	3.79333	7.37133
2019-01-06 22:00:00	0	26.8133	0	2.41333	6.40667	344.16	7.45333	50.4667	3.6	7.87667
2019-01-06 22:15:00	0	62.1067	0	12.2267	7.26667	283.173	8.41333	53.2	3.67333	8.32933
2019-01-06 22:30:00	0	170.747	0	25.6867	7.96	6.62	9.23333	355.667	4.02667	10.6047
2019-01-06 22:45:00	0	213.493	0	26.6467	7.69333	5.45333	8.96	283.933	4.14667	12.7107
2019-01-06 23:00:00	0	255.953	0	31.3467	7.42	8.2	8.96	166.533	4.08667	11.8973
2019-01-06 23:15:00	0	169.7	0	13.4933	6.36	283.247	7.98667	261.333	3.99333	10.8133
2019-01-06 23:30:00	0	124.987	0	18.0067	6.69333	191.6	7.82667	191.6	3.86667	13.6787
2019-01-06 23:45:00	0	141.013	0	25.0533	5.90667	168.393	6.90667	187.733	3.9	12.176
2019-01-07	0	168.833	0	23.98	6.79333	27.46	8.01333	190.733	3.77333	12.582
2019-01-07 00:15:00	0	56.9267	0	9.88	6.12667	304.9	7.7	143.133	3.76	14.014
2019-01-07 00:30:00	0	166.653	0	12.96	5.9	354.473	7.13333	191.4	3.74667	13.2733
2019-01-07 00:45:00	0	56.6867	0	10.36	6.34	351.98	7.78667	169.667	3.82667	14.8947
2019-01-07 01:00:00	0	55.6	0	12.98	7.26	328.813	8.26	145.467	3.96667	14.3967
2019-01-07 01:15:00	0	100.847	0	54.8067	7.25333	339.38	8.37333	307	4.01333	13.8167
2019-01-07 01:30:00	0	14.74	0	13.3133	6.28	350.607	7.56	121.4	4.01333	14.914
2019-01-07 01:45:00	0	31.7867	0	36.3267	6.64	262.5	7.79333	214.4	4.06667	12.5093
2019-01-07 02:00:00	0	74.9533	0	14.4867	6.97333	143.187	7.95333	50.0667	4.18	11.2893
2019-01-07 02:15:00	0	129.447	0	19.9467	6.63333	74.0667	7.88667	97.1333	4.2	11.1007
2019-01-07 02:30:00	0	174.127	0	20.58	7.53333	77.1	7.29333	191.733	4.20667	10.1027
2019-01-07 02:45:00	0	166.107	0	27.8533	7.04	8.50667	7.08667	27.0667	4.3	9.25267
2019-01-07 03:00:00	0	323.98	0	35.02	6.74667	10.1	7.23333	354.067	4.23333	8.21333
2019-01-07 03:15:00	0	233.887	0	32.8333	7.24667	12.1467	7.66	284.733	4.22	8.92333
2019-01-07 03:30:00	0	300.78	0	32.28	6.46667	9.88	7.47333	353.467	4.22667	9.446
2019-01-07 03:45:00	0	226.5	0	35.7933	6.91333	34.52	7.57333	260.067	4.1	9.022
2019-01-07 04:00:00	0	279.76	0	29.6067	6.78667	12.18	8.05333	239.2	4.03333	9.61
2019-01-07 04:15:00	0	294.567	0	29.34	5.79333	8.98667	7.65333	330.2	3.94667	10.7927
2019-01-07 04:30:00	0	238.6	0	27.48	6.75333	33.08	7.66667	3.8	3.91333	11.272
2019-01-07 04:45:00	0	298.427	0	38.5733	6.80667	9.14667	8.20667	4.6	3.89333	14.0393
2019-01-07 05:00:00	0	199.313	0	33.8067	7.68	45.08	8.32667	4.46667	3.89333	14.9187
2019-01-07 05:15:00	0	230.04	0	29.4667	6.68667	53.5333	7.74667	73.1333	3.72	11.5087
2019-01-07 05:30:00	0	143.867	0	33.56	6.80667	7.21333	7.78667	2.8	3.58	11.7253
2019-01-07 05:45:00	0	317.7	0	35.7867	7.04	7.31333	8.12	26	3.48	14.1087
2019-01-07 06:00:00	0	233.507	0	35.3067	7.18667	9.34667	8.31333	3.73333	3.40667	14.7713
2019-01-07 06:15:00	0	319.46	0	40.66	7.48	14.2133	8.68667	5.4	3.37333	16.9173
2019-01-07 06:30:00	0	285.613	0	44.0267	7.25333	13.8733	9.08	307.867	3.23333	18.7807
2019-01-07 06:45:00	0	290.813	0	35.8467	8.02667	11.3667	9.11333	165.8	3.19333	20.686
2019-01-07 07:00:00	0	315.607	0	40.44	8.17333	10.3467	9.41333	3.06667	3.33333	22.904
2019-01-07 07:15:00	0	229.84	0	38.2267	8.47333	11.14	9.58	27.2667	3.36	23.9833
2019-01-07 07:30:00	0	338.88	0	34.5333	8.61333	10.62	9.47333	3.8	3.35333	23.0627
2019-01-07 07:45:00	0	274.153	0	29.3867	7.74	11.7267	9.18667	3.86667	3.27333	23.5147
2019-01-07 08:00:00	0	339.207	0	35.1333	8.06667	10.8733	8.76	3.6	3.32	22.504
2019-01-07 08:15:00	0	254.473	0	34.8133	7.85333	10.24	8.48667	72.9333	3.23333	19.8153
2019-01-07 08:30:00	0	249.633	0	31.8933	7.58	7.66	8.44667	143.8	3.26667	18.0767
2019-01-07 08:45:00	0	228.947	0	40.2067	7.97333	9.74	8.82	25.2667	3.37333	19.0447
2019-01-07 09:00:00	0	318.513	0	36.28	8.34667	7.85333	9.34	2.33333	3.50667	20.5087
2019-01-07 09:15:00	0	281.533	0	41.9	7.30667	10.7733	9.30667	3.66667	3.75333	19.1353
2019-01-07 09:30:00	0	303.3	0	39.4733	7.68667	17.8	9.62667	145	3.91333	19.3967
2019-01-07 09:45:00	0	308.867	0	48.8533	8.08667	14.1667	9.76	166.933	4.12	22.8767
2019-01-07 10:00:00	0	312.013	0	38.8133	7.12667	13.4067	9.59333	144.4	4.32	22.806
2019-01-07 10:15:00	0	343.147	0	49.1533	7.03333	17.3933	8.64	216.2	4.41333	22.2067
2019-01-07 10:30:00	0	334.14	0	48.32	6.64	19.2667	7.50667	74.9333	4.73333	21.2273
2019-01-07 10:45:00	0	250.587	0	65.88	7.11333	23.0267	7.36667	169.267	4.92667	21.1
2019-01-07 11:00:00	0	284.92	0	54.8	7.61333	30.54	7.74	238.133	5.28667	23.0087
2019-01-07 11:15:00	0	327.893	0	59.2133	7.47333	26.1467	7.42667	308.067	5.40667	20.5953
2019-01-07 11:30:00	0	317.88	0	59.2267	8.12667	32.0533	7.72	191.533	5.6	20.9967
2019-01-07 11:45:00	0	329.433	0	51.5467	7.58667	29.9533	7.41333	236.267	6.13333	20.244
2019-01-07 12:00:00	0.08	268.88	0	62.7733	6.95333	35.5267	6.95333	284.267	6.56667	19.56
2019-01-07 12:15:00	0.56	269.647	0.453333	50.4667	6.96667	30.6867	7.12667	237.933	6.69333	21.926
2019-01-07 12:30:00	0.88	323.6	1.69333	50.0267	7.63333	28.1133	7.07333	191.133	7.00667	20.8113
2019-01-07 12:45:00	1.25333	309.4	1.52667	53.0467	6.76	28.2133	6.7	284.333	7.24	19.058
2019-01-07 13:00:00	0.826667	283.453	0.366667	51.72	6.58	26.98	5.99333	260.533	7.45333	13.5107
2019-01-07 13:15:00	0.533333	291.513	0.833333	55.0467	6.32	24.94	5.52	124.333	7.48	9.114
2019-01-07 13:30:00	0.32	305.98	0.22	59.8133	5.62667	33.2267	5.14	281.6	7.57333	6.91067
2019-01-07 13:45:00	0.48	308.487	0.28	62.6933	4.69333	30.2933	4.96667	324.067	7.54	5.09533
2019-01-07 14:00:00	0.693333	272.78	0.633333	62.2	4.38	81.8667	4.2	240.067	7.69333	3.51067
2019-01-07 14:15:00	0.4	325.88	0.486667	72.66	4.5	34.9533	4.03333	279.2	8.03333	2.57667
2019-01-07 14:30:00	0.88	207.22	0.693333	65.3333	3.16667	35.5133	3.42667	193.533	8.12	4.2
2019-01-07 14:45:00	0.533333	207.1	0	89.8267	4.44	121.273	4.39333	146.267	8.42	3.556
2019-01-07 15:00:00	0.4	286.267	0.44	63.62	3.87333	40.34	3.44667	212.4	8.3	3.01133
2019-01-07 15:15:00	0.48	196.787	1.04	88.0267	4.76667	53.7933	4.56	233.333	8.82	3.106
2019-01-07 15:30:00	0	250.587	0	71.86	4.77333	39.4467	4.5	53.7333	8.17333	2.29467
2019-01-07 15:45:00	0.24	302.5	0.373333	72.6267	3.88667	48.9	4.04	238.067	8.18	1.78733
2019-01-07 16:00:00	0.4	296.427	0.293333	91.9067	4.16667	59.3933	4.36667	189.067	8.5	2.288
2019-01-07 16:15:00	0	306.907	0	81.1067	3.82	51.88	3.93333	165.667	8.19333	2.16133
2019-01-07 16:30:00	0.16	317.267	0.5	88.0733	4.22	57.0333	3.47333	172.667	8.04667	1.77067
2019-01-07 16:45:00	0.08	261.733	0.373333	100.3	3.84	65.8533	4.10667	99.3333	7.95333	2.176
2019-01-07 17:00:00	0	282.16	0	90.26	4.60667	60.62	4.62	348.867	7.58667	2.40333
2019-01-07 17:15:00	0	287.193	0	91.7667	4.88	59.7	4.07333	326	7.26667	2.16533
2019-01-07 17:30:00	0.08	275.593	0	101.013	4.27333	72.1067	4.02667	36.3333	6.82	2.89867
2019-01-07 17:45:00	0	253.46	0.073333	106.733	4.55333	73.9533	4.18	100.133	6.23333	3.44333
2019-01-07 18:00:00	0	270.713	0	108.94	4.82	78.08	4.51333	167.267	5.54	3.93067
2019-01-07 18:15:00	0	166.4	0	103.573	5.24667	73.2733	4.76	213.8	5.10667	4.40867
2019-01-07 18:30:00	0.08	276.587	0	93.52	4.04667	67.2133	4.09333	258.6	5.26667	3.88867
2019-01-07 18:45:00	0	294.12	0	86.72	4.98667	60.7	4.66667	329	5.74	3.224
2019-01-07 19:00:00	0	296.927	0	76.5533	5.63333	51.7533	5.2	346.8	5.88667	4.548
2019-01-07 19:15:00	0	311.227	0	71.0533	5.78667	41.2933	5.58667	210.2	5.70667	4.89933
2019-01-07 19:30:00	0	300.453	0	68.94	6.74667	34.1133	6.66	213.667	5.48	6.43333
2019-01-07 19:45:00	0	312.873	0	67.6867	7.3	36.62	7.50667	353.8	5.46667	9.486
2019-01-07 20:00:00	0	310.333	0	67.8333	7.08	36.56	7.72667	353.733	5.29333	11.528
2019-01-07 20:15:00	0	315.16	0	65.1667	7.35333	36.7	7.79333	308.2	5.22	10.2033
2019-01-07 20:30:00	0	318.14	0	58.2	6.92	32.8067	7.18	354.6	4.97333	9.496
2019-01-07 20:45:00	0	306.687	0	56.2333	6.64	32.8	6.81333	353.867	4.81333	10.3193
2019-01-07 21:00:00	0	310.267	0	60.6533	6.56667	32.6733	7.22667	353.333	4.76667	12.556
2019-01-07 21:15:00	0	267.98	0	61.6333	7.29333	28.6333	7.68667	351.667	4.68	12.8253
2019-01-07 21:30:00	0	319.467	0	55.66	7.08	25.5267	7.24	349.267	4.66667	14.2407
2019-01-07 21:45:00	0	316.373	0	53.1267	6.64	26.9733	6.11333	328.4	4.70667	10.2607
2019-01-07 22:00:00	0	302.647	0	64.0933	5.56667	37.4867	5.15333	5	4.64	5.79333
2019-01-07 22:15:00	0	310	0	60.1733	4.5	43.4267	4.51333	9.86667	4.75333	3.41333
2019-01-07 22:30:00	0	321.507	0	59.3067	4.28667	44.7933	4.08667	8.86667	4.82	1.84867
2019-01-07 22:45:00	0	330.113	0	50.4	3.91333	36.7733	3.49333	25.5333	4.62	0.734
2019-01-07 23:00:00	0	336.513	0	45.4733	3.56667	29.3	3.92667	167.667	4.58	0.474667
2019-01-07 23:15:00	0	251.247	0	35.7933	4.34	17.1267	4.35333	322.2	4.58667	0.844
2019-01-07 23:30:00	0	211.773	0	31.9267	4.92667	14.1733	5.14	276.933	4.46	2.264
2019-01-07 23:45:00	0	146.453	0	27.3	5.56667	8.76667	5.64	331.8	4.45333	3.77533
2019-01-08	0	79.8533	0	22.5067	5.51333	7.30667	6.21333	167.133	4.36667	4.834
2019-01-08 00:15:00	0	125.707	0	23.3333	5.78667	7.54667	6.13333	258.733	4.38667	6.182
2019-01-08 00:30:00	0	236.6	0	24.4867	5.46	7.92667	5.93333	307.6	4.22667	7.21867
2019-01-08 00:45:00	0	163.467	0	25.7	5.19333	4.30667	5.28	350.133	4.38	7.02867
2019-01-08 01:00:00	0	187.66	0	32.7667	6.04667	9.07333	5.5	350.333	4.27333	6.80667
2019-01-08 01:15:00	0	97.4533	0	31.3333	5.51333	5.9	5.54	343.867	4.44667	6.822
2019-01-08 01:30:00	0	55.0533	0	25.3133	5.67333	49.18	5.48	215	4.56	6.202
2019-01-08 01:45:00	0	284.087	0	24.9	5.88667	2.24667	5.33333	26	4.46	6.122
2019-01-08 02:00:00	0	300.96	0	26.5467	5.56667	3.32	5.43333	75.0667	4.49333	6.354
2019-01-08 02:15:00	0	306.4	0	27.46	5.51333	5.26	5.54667	5.53333	4.36667	6.59467
2019-01-08 02:30:00	0	164.36	0	24.2333	5.72667	1.97333	5.45333	27.9333	4.46667	6.55467
2019-01-08 02:45:00	0	190.247	0	29.1933	5.40667	4.14667	5.65333	7.06667	4.43333	6.376
2019-01-08 03:00:00	0	251.873	0	35.34	5.89333	6.32	6.16667	11.8667	4.34	7.71067
2019-01-08 03:15:00	0	348.04	0	53.9467	6.58	19.56	6.87333	354.733	4.24667	11.5587
2019-01-08 03:30:00	0	300.26	0	37.48	6.25333	8.38	6.15333	347.667	4.24	9.04533
2019-01-08 03:45:00	0	230.133	0	32.9533	6.58	6.54667	7.02	347.933	4.04	10.5187
2019-01-08 04:00:00	0	305.573	0	32.3467	6.94	7.25333	7.05333	350.733	4.02667	10.376
2019-01-08 04:15:00	0	296.02	0	35.5133	6.76	10.6267	6.98667	353.933	3.97333	10.0247
2019-01-08 04:30:00	0	323.873	0	36.04	6.87333	8.16667	7.22	352.533	3.88	11.6093
2019-01-08 04:45:00	0	259.033	0	36.12	7.14	8.09333	7.8	350.8	3.76667	13.5513
2019-01-08 05:00:00	0	266.6	0	28.14	7.24667	9.14	8.42667	353.333	3.54667	14.67
2019-01-08 05:15:00	0	247.187	0	44.7333	8.00667	32.8267	9.38667	334.267	3.42	18.014
2019-01-08 05:30:00	0	243.467	0	41.82	9.02	16.7933	9.92	26.5333	3.29333	20.6213
2019-01-08 05:45:00	0	330.36	0	50.2133	9.73333	20.24	9.44	5.2	3.38667	20.2433
2019-01-08 06:00:00	0	216.28	0	43.4133	8.91333	19.2	9.24	5.13333	3.26	19.99
2019-01-08 06:15:00	0	291.987	0	41.16	8.58	20.6267	9.40667	74.8	3.12	20.4447
2019-01-08 06:30:00	0	198.947	0	47.2	8.85333	16.1467	8.86	214.467	2.99333	19.2887
2019-01-08 06:45:00	0	296.18	0	44.36	9.70667	18.5533	8.21333	98.6667	2.98	17.2567
2019-01-08 07:00:00	0	306.72	0	41.7467	8.96667	26.2867	7.72667	306.667	2.90667	16.034
2019-01-08 07:15:00	0	198.467	0	35.64	8.95333	16.7733	7.73333	4.86667	2.86667	14.6753
2019-01-08 07:30:00	0	271.567	0	34.26	8.52667	18.08	7.58667	237.533	2.79333	13.6607
2019-01-08 07:45:00	0	251.987	0	45.9667	7.75333	32.5933	7.56	262.467	2.77333	13.446
2019-01-08 08:00:00	0	280.3	0	43.96	8.02667	15.5533	7.06	120.333	2.68667	12.5353
2019-01-08 08:15:00	0	277.1	0	58.4867	7.51333	17.2467	6.34	52.1333	2.74	10.82
2019-01-08 08:30:00	0	289.06	0	43.8467	6.86667	24.8	6.18667	4.93333	2.92	10.272
2019-01-08 08:45:00	0	304.593	0	55.8733	7.14667	27.2933	6.52667	5.6	2.98	10.1967
2019-01-08 09:00:00	0	326.147	0	48.2067	7.16	24.0067	6.41333	4.73333	3	9.60667
2019-01-08 09:15:00	0	313.033	0	49.2467	7.24667	26.9067	6.32	28.8667	3.02667	9.74
2019-01-08 09:30:00	0	318.313	0	51.44	7.15333	28.6333	6.18	7.73333	3.18667	9.26933
2019-01-08 09:45:00	0	277.407	0	62	7.02667	26.78	6.19333	3.6	3.25333	9.17933
2019-01-08 10:00:00	0	314.02	0	82.8133	6.44667	29.5667	6.17333	29.3333	3.3	8.868
2019-01-08 10:15:00	0.16	293.687	0	68.5467	5.30667	35.1133	5.8	29.1333	3.29333	7.46333
2019-01-08 10:30:00	0	279.533	0	82.4267	5.30667	35.1333	5.61333	8.2	3.29333	5.44267
2019-01-08 10:45:00	0	302.127	0.073333	82.3467	4.66	31.76	5.11333	6.26667	3.38667	4.49267
2019-01-08 11:00:00	0	294.853	0	84.92	4.44	42.54	4.37333	61	3.4	3.396
2019-01-08 11:15:00	0	294.26	0	92.1	3.56667	54.6933	4.42	28.0667	3.6	2.84533
2019-01-08 11:30:00	0	307.413	0	74.9867	3.84	47.9933	4.32667	3.66667	3.56667	2.68333
2019-01-08 11:45:00	0	306.693	0	71.46	4.06	45.7333	3.69333	146.133	3.52667	2.002
2019-01-08 12:00:00	0.08	296.193	0.073333	68.02	2.71333	29.5	3.33333	214.533	3.74667	1.23067
2019-01-08 12:15:00	0	323.393	0	61.44	3.04667	29.4	3.78667	120.8	3.79333	1.45933
2019-01-08 12:30:00	0	279.28	0	57.6467	3.90667	31.7867	3.88	191.533	3.79333	1.63067
2019-01-08 12:45:00	0	303.02	0	66.72	4.39333	33.0467	3.98667	53.2667	3.94	1.632
2019-01-08 13:00:00	0	304.96	0	71.6867	4.54667	34.9933	4.19333	9.06667	4.09333	1.97933
2019-01-08 13:15:00	0	292.08	0	66.4067	4.23333	36.14	4.1	34.1333	4.14	1.36667
2019-01-08 13:30:00	0	297.253	0	78.9667	4.01333	43.2867	3.72	214.667	4.34667	0.932
2019-01-08 13:45:00	0	306.193	0	78.0867	3.46	46.16	3.45333	260.733	4.16	1.02933
2019-01-08 14:00:00	0	296.987	0	80.9133	4.12	50.2467	3.67333	52.0667	4.37333	1.03
2019-01-08 14:15:00	0	291.84	0	83.2933	3.28	53.12	3.12	53.0667	4.44667	0.706667
2019-01-08 14:30:00	0	299.673	0	89.04	3.45333	62.1867	3.44	12	4.43333	0.912
2019-01-08 14:45:00	0	292	0	103.347	3.96	71.1667	3.52	8.26667	4.65333	1.25267
2019-01-08 15:00:00	0	287.96	0	100.273	3.91333	69.5933	3.82667	127	4.76667	1.10467
2019-01-08 15:15:00	0	278.173	0	99.7133	4.39333	75.7467	4.26	331.733	4.69333	1.274
2019-01-08 15:30:00	0	262.007	0	103.24	5.24667	74.2733	4.60667	308.667	4.60667	1.94267
2019-01-08 15:45:00	0	283.107	0	99.3733	4.76667	68.3	4.22667	281.933	4.38667	2.11467
2019-01-08 16:00:00	0.08	269.573	0	101.753	3.8	71.7	3.46667	237.467	4.25333	1.604
2019-01-08 16:15:00	0.16	288.133	0	99.42	3.62667	70.1067	2.95333	303.667	4.2	1.074
2019-01-08 16:30:00	0	302.633	0	93.6	3.79333	62.28	3.24667	144.133	4.26667	0.65
2019-01-08 16:45:00	0.08	294.153	0	86.7733	3.39333	56.5133	3.06	145.867	4.37333	0.252
2019-01-08 17:00:00	0	294.427	0	87.6533	2.82	55.86	2.89333	144	4.32	0.104667
2019-01-08 17:15:00	0	297.5	0	94.64	3.62667	59.3733	3.14	191.267	4.2	0.114667
2019-01-08 17:30:00	0	292.253	0	87.84	3.4	54.54	3.28	345.267	4.11333	0.050667
2019-01-08 17:45:00	0	295.327	0	82.72	3.34	51.5333	3.30667	5.53333	3.94	0.446667
2019-01-08 18:00:00	0	298.72	0	80.1067	3.78667	51.5667	3.52667	29.2667	3.82667	0.745333
2019-01-08 18:15:00	0	292.793	0	81.8133	4.66	53.3133	4.07333	6.73333	3.79333	1.43933
2019-01-08 18:30:00	0	275.167	0	78.12	4.71333	51.92	4.08	5.93333	3.76	1.068
2019-01-08 18:45:00	0	315.553	0.073333	71.64	4.71333	43.8133	4.44	167.2	3.72	1.61267
2019-01-08 19:00:00	0	303.527	0	63.4867	4.34	42.04	4.33333	144.067	3.7	2.504
2019-01-08 19:15:00	0	314.907	0	57.6533	4.87333	37.86	4.58667	330.4	3.64667	2.24467
2019-01-08 19:30:00	0	318.087	0	60.7533	5.08667	40.2133	4.90667	285.267	3.62667	3.02133
2019-01-08 19:45:00	0	292.227	0	67.7133	5.08667	43.32	4.79333	73.1333	3.54	3.36133
2019-01-08 20:00:00	0	296.393	0	68.82	5.46	48.68	5.22667	4.6	3.56	4.96
2019-01-08 20:15:00	0	297.947	0	74.7267	4.98	45.72	4.80667	145.067	3.48667	5.106
2019-01-08 20:30:00	0	298.693	0	58.2333	4.92667	31.5933	4.95333	332.467	3.32	4.684
2019-01-08 20:45:00	0.08	313.013	0	60.5667	5.46	32.1	5.27333	354.133	3.33333	3.944
2019-01-08 21:00:00	0	307.62	0	62.5133	5.62	31.6333	5.41333	354	3.29333	4.54
2019-01-08 21:15:00	0	316.007	0	58.4067	5.46	31	5.63333	353.733	3.24667	4.98
2019-01-08 21:30:00	0	315.14	0	51.1867	6.24667	24.48	5.98667	349.6	3.2	6.44867
2019-01-08 21:45:00	0	319.94	0	49.52	5.84	24.4867	5.76667	346.933	3.2	6.60133
2019-01-08 22:00:00	0	311.647	0	50.8067	6.05333	23.12	6.01333	323.6	3.24667	6.948
2019-01-08 22:15:00	0	279.953	0	48.32	7.08	20.7733	6.73333	260.8	3.23333	9.00667
2019-01-08 22:30:00	0	284.027	0	50.4667	6.64667	17.7467	7.10667	330.733	3.22	11.2
2019-01-08 22:45:00	0	272	0	48.0333	7.40667	21.7733	7.13333	238.733	3.13333	11.6767
2019-01-08 23:00:00	0	198.053	0	51.4933	7.01333	22.6467	7.09333	356.067	3.1	10.5307
2019-01-08 23:15:00	0	240.287	0	48.1333	6.81333	19.02	7.38667	308.067	3.04	11.5853
2019-01-08 23:30:00	0	214.973	0	41.8933	6.36	15.0133	7.18667	352.133	3.05333	10.8233
2019-01-08 23:45:00	0	272.62	0	48.48	6.58	15.4733	7.39333	307.4	2.96667	10.9413
2019-01-09	0	263.113	0	41.72	6.86	18.6267	7.05333	260.867	2.9	9.21067
2019-01-09 00:15:00	0	189.287	0	41.4733	7.12667	14.2867	6.92	285.133	2.85333	8.99933
2019-01-09 00:30:00	0	241.567	0	37.4333	7.04	16.9733	6.90667	191.267	2.78	9.07867
2019-01-09 00:45:00	0	205.007	0	40.28	6.75333	14.0133	6.83333	191.2	2.70667	9.52133
2019-01-09 01:00:00	0	300.16	0	44.7533	6.91333	20.22	6.92667	49.4667	2.68667	9.792
2019-01-09 01:15:00	0	212.267	0	32.96	7.02	12.5067	6.95333	331.067	2.68	9.36533
2019-01-09 01:30:00	0	100.093	0	46.6333	6.12	8.51333	6.86	349.667	2.62	9.19467
2019-01-09 01:45:00	0	155.6	0	32.8933	6.31333	38.7133	6.86	305.2	2.57333	9.45467
2019-01-09 02:00:00	0	232.8	0	35.8467	5.81333	33.2933	6.52	353.467	2.52	7.65067
2019-01-09 02:15:00	0	204.727	0	31.8067	6.06667	10.2733	5.95333	307.667	2.51333	7.40867
2019-01-09 02:30:00	0	259.38	0	44.1867	6.57333	12.92	6.53333	191.133	2.5	9.004
2019-01-09 02:45:00	0	307.793	0	38.5133	6.74667	13.8667	6.40667	121.6	2.5	9.01067
2019-01-09 03:00:00	0	288.093	0	35.46	7.31333	36.7133	6.36	5.73333	2.5	9.86
2019-01-09 03:15:00	0	328.127	0	36.3667	7.25333	19.7	6.84667	4.53333	2.40667	10.7553
2019-01-09 03:30:00	0	312.527	0	46.86	7.09333	16.7067	6.84	144.867	2.24	11.2147
2019-01-09 03:45:00	0	319.187	0	36.9333	7.31333	14.3867	6.92667	261.533	2.18667	11.3253
2019-01-09 04:00:00	0	225.993	0	34.4467	6.86	11.5667	6.85333	349.667	2.01333	10.4207
2019-01-09 04:15:00	0	333.42	0	44.4667	6.36667	10.0533	6.53333	348.267	1.87333	8.756
2019-01-09 04:30:00	0	272.48	0	35.3667	5.58667	36.5533	5.98	346.6	1.80667	7.90333
2019-01-09 04:45:00	0	225.913	0	32.0133	6.18667	10.62	6.05333	346.533	1.76667	8.31
2019-01-09 05:00:00	0	287.533	0	45.0267	5.14	14.02	6.01333	325.733	1.65333	8.27333
2019-01-09 05:15:00	0	281.72	0	39.12	5.41333	12.7333	5.94	346.6	1.48667	7.72067
2019-01-09 05:30:00	0	329.873	0	51.7733	5.3	19.7867	6.1	353.2	1.30667	7.524
2019-01-09 05:45:00	0	312.24	0	49.8333	6.28667	26.1533	5.79333	285.933	1.16	7.15733
2019-01-09 06:00:00	0	290.76	0	61.38	5.63333	27.3467	5.08667	32.4	1.05333	6.01
2019-01-09 06:15:00	0	300.84	0	61.3867	5.94667	31.7933	5.08	170.267	1	5.35533
2019-01-09 06:30:00	0	301.387	0	53.12	5.78667	30.96	5.08	51.8667	0.906667	5.444
2019-01-09 06:45:00	0	308.24	0	60.5067	5.83333	36.2067	5.01333	8.73333	0.853333	4.81467
2019-01-09 07:00:00	0	289.153	0	80.2667	5.46	46.5533	4.86667	10.8667	0.793333	4.13467
2019-01-09 07:15:00	0	301.3	0	71.1333	5.14	37.2467	4.87333	237.533	0.8	5.03267
2019-01-09 07:30:00	0	286.72	0	48.88	5.04	20.04	4.91333	231.467	0.786667	5.09533
2019-01-09 07:45:00	0	295.32	0	50.5733	5.03333	22.66	4.74667	58.2667	0.8	4.26267
2019-01-09 08:00:00	0	301.293	0	73.6933	4.76667	40.28	4.66667	14.1333	0.84	3.57867
2019-01-09 08:15:00	0	300.547	0	76.04	4.65333	38.8267	4.69333	82.8667	0.8	3.744
2019-01-09 08:30:00	0	299.507	0	79.5867	4.28667	49.48	4.74	354.133	0.8	3.784
2019-01-09 08:45:00	0	305.4	0	78.3933	4.98	39.7267	4.80667	348.333	0.8	3.91
2019-01-09 09:00:00	0	295.207	0	80.5133	4.98	46.8133	4.66	348.867	0.8	3.584
2019-01-09 09:15:00	0	283.267	0	85.6333	4.44667	52.4	4.48	352.333	0.813333	3.09267
2019-01-09 09:30:00	0	281.853	0	88.3933	4.07333	55.9867	4.12667	191.133	0.846667	1.63267
2019-01-09 09:45:00	0	283.287	0	95.7667	3.8	55.56	3.76	73.6667	0.9	1.05067
2019-01-09 10:00:00	0	282.74	0	93.7067	3.95333	57.18	3.64667	7.66667	0.906667	0.808
2019-01-09 10:15:00	0.08	275.387	0	93.1867	3.57333	55.92	3.18667	12.2	0.946667	0.200667
2019-01-09 10:30:00	0	299.067	0	61.4333	3.63333	35.4067	2.79333	143.867	1.12	0.264667
2019-01-09 10:45:00	0	309.407	0	76.48	2.76	37.9267	2.84667	168.067	1.32667	0.376
2019-01-09 11:00:00	0	297.633	0	73.6067	3.29333	43.7933	3.14	260.267	1.55333	0.315333
2019-01-09 11:15:00	0	289.1	0.146667	93.94	2.98	58.7067	3.20667	8.86667	1.59333	0
2019-01-09 11:30:00	0	274.98	0	107.867	2.69333	75.5733	2.84	171.067	1.60667	0
2019-01-09 11:45:00	0.16	276.627	0.293333	105.9	2.53333	66.9933	2.64667	260.867	1.72	0
2019-01-09 12:00:00	0.08	283.88	0.353333	106.62	2.69333	77.5067	2.77333	191.933	1.63333	0
2019-01-09 12:15:00	0	290.54	0.366667	107.633	2.42667	77.3667	2.52667	144.667	1.73333	0
2019-01-09 12:30:00	0.16	296.033	0.146667	102.64	2.48	75.98	2.33333	98.6	1.86667	0
2019-01-09 12:45:00	0.32	277.107	0	100.053	2.74667	73.4733	2.45333	168.333	1.93333	0
2019-01-09 13:00:00	0.08	269.993	0.426667	108.787	2.53333	76.0133	2.14	301.933	1.97333	0
2019-01-09 13:15:00	0.08	276.72	0.366667	99.26	2.21333	77.1467	2.14667	236.867	2.16	0
2019-01-09 13:30:00	0	255.08	0.073333	104.153	2.64667	74.82	2.08	347.4	2.17333	0
2019-01-09 13:45:00	0	259.793	0.266667	104.107	2.26667	77.74	2.24	317	2.08667	0
2019-01-09 14:00:00	0	279.787	0.22	101.953	2.21333	80.0267	1.83333	294.4	1.98667	0
2019-01-09 14:15:00	0.08	293.793	0	97.22	1.68	75.7867	1.6	337.933	2.05333	0
2019-01-09 14:30:00	0.08	286.2	0	97.0267	2.16	70.0667	2.08	334.8	2.17333	0
2019-01-09 14:45:00	0.16	277.26	0.366667	102.787	2.71333	71.46	2.69333	334.667	2.14667	0
2019-01-09 15:00:00	0.24	220.3	0	103.253	3.33333	72.78	2.97333	169.667	2.14	0
2019-01-09 15:15:00	0	279.46	0.22	102.087	2.94	71.0267	3.07333	237.333	2.14667	0
2019-01-09 15:30:00	0	215.98	0.266667	101.607	4.07333	72.8467	3.4	213.8	2.14	0
2019-01-09 15:45:00	0	282.387	0	102.333	4.28667	70.0867	3.53333	214.733	2.15333	0.088
2019-01-09 16:00:00	0	276.907	0	102.72	4.01333	69.94	3.49333	190.533	2.15333	0.153333
2019-01-09 16:15:00	0	285.113	0	100.673	4.06	62.8467	3.50667	327.733	2.07333	0.249333
2019-01-09 16:30:00	0	285.513	0	98.68	4.12667	64.2533	4.00667	143.467	2.06	0.705333
2019-01-09 16:45:00	0	294.72	0	105.667	4.34	74.5667	3.74667	9.66667	2.1	1.308
2019-01-09 17:00:00	0	231.687	0	107.413	4.34	78.46	3.65333	5.73333	2.1	0.78
2019-01-09 17:15:00	0	277.58	0.266667	108.953	3.96667	80.7	3.57333	4.6	2.1	0.703333
2019-01-09 17:30:00	0	277.133	0	106.347	4.23333	76.76	3.76	6.4	2.1	1.15333
2019-01-09 17:45:00	0	298.967	0	105.107	4.55333	71.1067	4.06	238.933	2.01333	1.45
2019-01-09 18:00:00	0	295.813	0	101.667	4.12	71.2	3.41333	121.133	2	0.725333
2019-01-09 18:15:00	0	272.5	0	104.633	4.23333	67.48	3.65333	262.2	2	0.504667
2019-01-09 18:30:00	0	265.207	0	101.707	4.12667	70.14	3.97333	74.2667	2	0.787333
2019-01-09 18:45:00	0	260.14	0	99.04	4.76667	68.2333	4.18	237.467	2	0.916667
2019-01-09 19:00:00	0	292.127	0	100.667	4.34	66.7267	3.61333	285.6	2	0.438667
2019-01-09 19:15:00	0	291.207	0.133333	95.3467	3.34	65.7133	3.13333	354.467	2	0.012667
2019-01-09 19:30:00	0	260.987	0.366667	99.6	3.50667	64.9533	3.27333	330.8	2.01333	0.091333
2019-01-09 19:45:00	0	292.407	0	97.6933	3.86	62.7467	3.48	330.667	2.01333	0.172
2019-01-09 20:00:00	0	295.94	0	94.6667	4.18	59.34	3.87333	350.533	2.04	0.61
2019-01-09 20:15:00	0.16	302.947	0.353333	93.9733	3.1	56.1333	2.86	350.267	2.03333	0
2019-01-09 20:30:00	0	297.707	0.073333	83.8467	3.39333	54.8467	3.28667	98.4	2.02	0
2019-01-09 20:45:00	0.08	290.467	0	89.8	3.96	59.9733	3.55333	144.133	2	0.130667
2019-01-09 21:00:00	0.16	298.933	0	90.5133	3.17333	58.7933	2.8	284.067	2	0
2019-01-09 21:15:00	0	298.187	0.073333	88.4467	2.86667	53.1867	2.96667	349.867	2.1	0
2019-01-09 21:30:00	0.08	300.607	0	79.04	3.84667	49.8533	3.74667	348.533	2.06	0.704667
2019-01-09 21:45:00	0	295.333	0	80.4133	4.44667	50.5267	4.15333	349.8	2.06	1.35667
2019-01-09 22:00:00	0	296.56	0	72.8667	4.28667	48.1467	4.15333	346.467	2.00667	1.45733
2019-01-09 22:15:00	0	300.34	0	70.28	4.82	42.9867	4.66	346.333	2	1.948
2019-01-09 22:30:00	0	304.553	0	72.5933	4.44667	41.58	4.67333	143.733	2	2.35667
2019-01-09 22:45:00	0	303.753	0	64.2133	4.55333	43.3867	4.92	214.933	2	2.982
2019-01-09 23:00:00	0	298.027	0	73.2933	4.71333	42.38	5.13333	285.667	1.99333	4.11733
2019-01-09 23:15:00	0	308.24	0	76.4467	5.03333	44.8867	5.30667	238	1.94	5.37067
2019-01-09 23:30:00	0	291.247	0	73	5.46	39.7067	5.54667	356.067	1.91333	6.18
2019-01-09 23:45:00	0	319.46	0	61.9667	5.35333	35.9933	5.47333	355.667	1.86667	6.058
2019-01-10	0	318.353	0	62.86	5.14	33.4933	5.52667	354.333	1.83333	6.08067
2019-01-10 00:15:00	0	301.8	0	58.6333	5.88667	32.06	5.7	351	1.8	6.59933
2019-01-10 00:30:00	0	313.193	0	64.8467	5.67333	32.9133	5.70667	349.867	1.8	7.08
2019-01-10 00:45:00	0	313.833	0	50.6133	5.62667	26.9667	5.79333	347.4	1.78667	6.87267
2019-01-10 01:00:00	0	299.573	0	47.6733	6.10667	25.74	5.65333	343.867	1.70667	6.262
2019-01-10 01:15:00	0	327.98	0	50.66	5.78667	22.4067	5.68	185.867	1.7	6.61067
2019-01-10 01:30:00	0	138.373	0	44.0733	4.76667	22.58	5.49333	190.533	1.7	6.31467
2019-01-10 01:45:00	0	298.52	0	45.2733	5.41333	18.04	5.42	329.333	1.64	6.014
2019-01-10 02:00:00	0	291.327	0	53.6067	6.07333	19.68	6	332.133	1.5	6.73333
2019-01-10 02:15:00	0	335.093	0	48.9533	6.87333	15.1333	6.31333	214	1.46667	8.828
2019-01-10 02:30:00	0	341.207	0	42.0733	5.64667	42.4	6.36667	237.6	1.4	10.0133
2019-01-10 02:45:00	0	330.433	0	46.1	5.63333	19.7733	6.39333	305.267	1.41333	9.57
2019-01-10 03:00:00	0	318.767	0	41.9467	6.64667	15.6733	6.84	236.267	1.4	9.03867
2019-01-10 03:15:00	0	270.047	0	40.9267	8.01333	17.82	7.73333	50.2	1.26667	10.2093
2019-01-10 03:30:00	0	224.82	0	40.9533	8.32667	18.9533	7.97333	5	1.1	12.2533
2019-01-10 03:45:00	0	228.187	0	38.0933	7.74667	18.6	8.00667	120.867	1.1	12.4667
2019-01-10 04:00:00	0	243.287	0	37.3467	6.41333	18.6933	7.24	2.2	1.16	10.7267
2019-01-10 04:15:00	0.16	306.113	0	39.52	7.08667	17.5	7.04667	2.93333	1.20667	10.0987
2019-01-10 04:30:00	0	265.433	0	35.0067	6.64	19.3733	6.46667	27.5333	1.24	9.01333
2019-01-10 04:45:00	0	248.093	0	35.94	7.51333	9.63333	6.74667	238.733	1.22667	8.892
2019-01-10 05:00:00	0	316.987	0	37.9667	8.00667	10.7467	7.32	237.467	1.28	10.1
2019-01-10 05:15:00	0	182.9	0	38.4533	7.79333	9.17333	7.5	143.867	1.36	9.74667
2019-01-10 05:30:00	0	235.44	0	38.64	7.24667	10.5333	7.51333	238.8	1.42667	7.236
2019-01-10 05:45:00	0	291.773	0	46.8467	6.40667	16.7733	6.76667	167.067	1.37333	5.35733
2019-01-10 06:00:00	0	314.027	0	48.5467	5.24667	20.9867	6.14667	27.6667	1.23333	4.842
2019-01-10 06:15:00	0	306.66	0	47.7667	6.4	21.9533	6.78667	3.8	1.24667	6.386
2019-01-10 06:30:00	0	331.067	0	51.4733	5.64	26.1733	6.95333	27.0667	1.28	7.116
2019-01-10 06:45:00	0	330.413	0	54.6867	5.8	19.3667	5.88	100.267	1.3	7.42867
2019-01-10 07:00:00	0	325.34	0	55.64	5.82	24.52	5.87333	328.467	1.23333	7.34533
2019-01-10 07:15:00	0	306.967	0	60.78	4.82	21.7867	5.37333	327.2	1.20667	8.54333
2019-01-10 07:30:00	0	336.42	0	43.5267	5.31333	10.7733	6.66667	345.133	1.22	10.098
2019-01-10 07:45:00	0	314.673	0	39.66	6.52	12.9867	7.38	186.867	1.22	11.326
2019-01-10 08:00:00	0	269.147	0	44.52	6.41333	14.4933	7.37333	52.5333	1.18	10.64
2019-01-10 08:15:00	0	331.453	0	46.1867	7.57333	6.98667	8.89333	5.26667	1.28	13.4347
2019-01-10 08:30:00	0	336.367	0	39.58	8.03333	2.5	9.3	238.733	1.3	17.4613
2019-01-10 08:45:00	0	248.16	0	46.24	8.14	2.5	10.1867	119.733	1.36667	17.956
2019-01-10 09:00:00	0	318.887	0	39.7067	8.23333	2.58667	9.84	49.4	1.33333	19.704
2019-01-10 09:15:00	0	284.393	0	42.6333	8.06667	2.88	9.59333	27.8667	1.36667	19.1687
2019-01-10 09:30:00	0	306.533	0	36.1533	7.94667	8.8	9.46667	4.53333	1.49333	17.0113
2019-01-10 09:45:00	0	323.62	0	37.0333	7.31333	33.74	8.74667	50.6667	1.64	16.072
2019-01-10 10:00:00	0	156.447	0	35.0333	7.23333	30.1467	8.77333	96.8	1.72667	14.8387
2019-01-10 10:15:00	0	137.34	0	34.3067	7.67333	5.10667	9.26	356.267	1.78	14.6953
2019-01-10 10:30:00	0	232.987	0	30	8	52.78	9.88	356.6	1.96667	14.2947
2019-01-10 10:45:00	0	210.133	0	29.82	8.22667	7.21333	9.11333	356	2	13.4873
2019-01-10 11:00:00	0	291.64	0	37.1267	7.67333	32.5667	8.62	354.2	2.09333	12.4
2019-01-10 11:15:00	0	163.473	0	29.7933	6.75333	53.6933	8.29333	354.533	2.16	12.8093
2019-01-10 11:30:00	0	298.2	0	31.6467	6.90667	98.98	8.04	260.533	2.3	12.2547
2019-01-10 11:45:00	0	297.507	0	30.6533	7.18667	73.32	8.58667	213.733	2.48667	11.2713
2019-01-10 12:00:00	0	279.953	0	37.5333	6.86	36.1533	8.06667	191.467	2.72	10.8867
2019-01-10 12:15:00	0	335.793	0	49.92	6.3	18.0133	7.56667	52.4	2.81333	10.162
2019-01-10 12:30:00	0	267.453	0	51.0133	6.63333	18.1	6.69333	33.9333	2.85333	10.1587
2019-01-10 12:45:00	0	291.367	0	61.2	6.35333	27.8733	6.66	191.933	2.92	10.7167
2019-01-10 13:00:00	0	271.167	0	66.2467	7.25333	31.0667	7.51333	75.2	3	11.0747
2019-01-10 13:15:00	0	312.727	0	68.4667	6.64	31.6667	5.94667	50.7333	3.12	9.32467
2019-01-10 13:30:00	0	302.027	0	60.3333	6.18667	31.14	5.86	303.333	3.21333	9.29533
2019-01-10 13:45:00	0	307.62	0	69.3267	5.62667	36.5	5.62667	258.067	3.24	9.72267
2019-01-10 14:00:00	0	315.253	0	67.3067	5.08667	38.42	5.54	258.533	3.40667	9.268
2019-01-10 14:15:00	0	318.133	0	69.2933	5.58	40.4467	5.72	306.333	3.46667	8.28133
2019-01-10 14:30:00	0	299.773	0	79.02	6.36	45.2133	5.6	144.2	3.51333	7.21467
2019-01-10 14:45:00	0	294.7	0	79.44	4.74667	45.3933	5.06667	168.733	3.64	6.35333
2019-01-10 15:00:00	0	313.693	0	84.5467	5.68	60.9867	5.32667	327.133	3.65333	4.66533
2019-01-10 15:15:00	0	286.993	0	83.7267	5.2	48.1267	5.29333	327.533	3.66	3.972
2019-01-10 15:30:00	0	296.34	0	77.18	5.47333	49.0067	5.27333	301.933	3.69333	4.462
2019-01-10 15:45:00	0	310.593	0	71.1933	5.14	40.6467	4.9	167.667	3.72667	4.44467
2019-01-10 16:00:00	0	302.593	0	74.8533	5.14	41.98	4.12	121.133	3.76	4.29933
2019-01-10 16:15:00	0	306.433	0	86.98	5.14	52.6133	4.09333	55	3.83333	4.31733
2019-01-10 16:30:00	0	285.307	0	88.2133	4.71333	49.2267	4.84667	304.267	3.88667	5.03
2019-01-10 16:45:00	0	306.113	0	85.4	4.70667	55.3667	5.04667	324.6	3.9	5.50333
2019-01-10 17:00:00	0	301.1	0	82.8133	5.85333	41.7467	5.2	347.133	3.94	6.54467
2019-01-10 17:15:00	0	297.967	0	80.9933	5.74667	46.74	5.64667	325.333	3.91333	7.24867
2019-01-10 17:30:00	0	304.193	0	76.34	6.14	40.7333	5.76	304.533	3.93333	9.426
2019-01-10 17:45:00	0	306.653	0	66.1867	5.96	36.38	6.42	328.533	3.88667	11.9767
2019-01-10 18:00:00	0	263.113	0	65.7867	6.65333	31.2733	6.56667	326.733	3.87333	11.4707
2019-01-10 18:15:00	0	311.34	0	61.1	7.40667	31.44	7.62667	74.7333	3.91333	9.414
2019-01-10 18:30:00	0	305.827	0	61.3733	7.74	34.1133	6.59333	31.7333	3.88	10.01
2019-01-10 18:45:00	0	270.267	0	70.2267	5.86	36	6.26	10.9333	3.73333	13.262
2019-01-10 19:00:00	0	310.653	0	72.6	6.90667	41.0867	7.04667	97.5333	3.70667	15.502
2019-01-10 19:15:00	0	312.233	0	75.6733	7.46	49.1	7.32667	51.6	3.72667	15.8253
2019-01-10 19:30:00	0	296.7	0	70.76	6.8	43.6467	6.55333	146.533	3.77333	12.496
2019-01-10 19:45:00	0	302.92	0	66.0533	6.40667	32.0467	6.26	282.4	3.73333	6.77333
2019-01-10 20:00:00	0	312.26	0	60.4867	6.58667	28.04	6.22	329.8	3.8	5.33
2019-01-10 20:15:00	0	306.647	0	55.0867	6.46	26.22	6.69333	348.533	3.86	8.31533
2019-01-10 20:30:00	0	305.727	0	50.0133	6.62667	22.08	6.56	325	3.90667	11.022
2019-01-10 20:45:00	0	226.66	0	56.3	6.51333	23.54	7.16667	346.133	3.92	9.938
2019-01-10 21:00:00	0	338.28	0	44.3	6.28667	16.2067	6.59333	323.333	3.78667	7.826
2019-01-10 21:15:00	0	307.32	0	39.04	6.23333	17.2933	6.91333	52.5333	3.72667	8.12333
2019-01-10 21:30:00	0	331.253	0	45.7067	6.52	19.5933	7.14	33	3.68667	9.08533
2019-01-10 21:45:00	0	222.187	0	43.2	6.40667	65.0267	6.61333	216.467	3.78667	7.39933
2019-01-10 22:00:00	0	50.64	0	19.7267	5.30667	53.4667	5.62667	348.133	3.66	5.11333
2019-01-10 22:15:00	0	92.42	0	17.3067	5.3	192.807	5.92	100.533	3.48	8.00933
2019-01-10 22:30:00	0	156.007	0	20.7933	5.51333	145.18	6.06667	194.2	3.27333	9.816
2019-01-10 22:45:00	0	167.107	0	21.5	5.56667	50.1733	5.77333	145.8	3.14667	9.33533
2019-01-10 23:00:00	0	281.34	0	24.72	5.46	72.41	5.33	38.9	3.13	7.796
2019-01-10 23:15:00	0	97.52	0	23.24	5.03333	167.98	4.98667	98.1333	3.12667	5.32467
2019-01-10 23:30:00	0	31.4533	0	19.9	3.9	49.46	4.89333	53.6	2.66	4.36467
2019-01-10 23:45:00	0	0	0	0	0	0	4.60667	258.333	0	3.29067
2019-01-11	0	0	0	0	0	0	5.16	121	0	3.26933
2019-01-11 00:15:00	0	0	0	0	0	0	4.52667	307.133	0	2.032
2019-01-11 00:30:00	0	0	0	0	0	0	4.26667	123.267	0	1.914
2019-01-11 00:45:00	0	0	0	0	0	0	4.43333	304.2	0	3.28733
2019-01-11 01:00:00	0	0	0	0	0	0	4.53333	300	0	3.97333
2019-01-11 01:15:00	0	0	0	0	0	0	4.88667	327.133	0	4.824
2019-01-11 01:30:00	0	0	0	0	0	0	4.91333	323.533	0	5.69067
2019-01-11 01:45:00	0	0	0	0	0	0	5.01333	353.733	0	5.754
2019-01-11 02:00:00	0	0	0	0	0	0	4.76667	122.867	0	4.198
2019-01-11 02:15:00	0	0	0	0	0	0	5.27333	190.533	0	5.06067
2019-01-11 02:30:00	0	0	0	0	0	0	4.68667	349.133	0	3.47267
2019-01-11 02:45:00	0	0	0	0	0	0	3.70667	32.1333	0	1.70667
2019-01-11 03:00:00	0	0	0	0	0	0	3.66	8.93333	0	1.548
2019-01-11 03:15:00	0	0	0	0	0	0	3.60667	7.13333	0	1.03267
2019-01-11 03:30:00	0	0	0	0	0	0	3.74	27.0667	0	1.48467
2019-01-11 03:45:00	0	0	0	0	0	0	4.54667	351.467	0	3.30267
2019-01-11 04:00:00	0	0	0	0	0	0	4.69333	349	0	5.52667
2019-01-11 04:15:00	0	0	0	0	0	0	4.86	347.8	0	6.228
2019-01-11 04:30:00	0	0	0	0	0	0	4.95333	350.667	0	6.77
2019-01-11 04:45:00	0	0	0	0	0	0	5.17333	347.133	0	8.18267
2019-01-11 05:00:00	0	0	0	0	0	0	5.44	345.667	0	9.49467
2019-01-11 05:15:00	0	0	0	0	0	0	5.07333	345.867	0	7.43533
2019-01-11 05:30:00	0	0	0	0	0	0	4.97333	347.067	0	7.49333
2019-01-11 05:45:00	0	0	0	0	0	0	4.38667	345.467	0	4.59867
2019-01-11 06:00:00	0	0	0	0	0	0	4.5	344.8	0	3.64133
2019-01-11 06:15:00	0	0	0	0	0	0	4.76	345.4	0	4.628
2019-01-11 06:30:00	0	0	0	0	0	0	4.54667	118.4	0	4.43667
2019-01-11 06:45:00	0	0	0	0	0	0	4.42667	7.2	0	4.252
2019-01-11 07:00:00	0	0	0	0	0	0	5.29333	52.3333	0	4.792
2019-01-11 07:15:00	0	0	0	0	0	0	5.11333	10.7333	0	6.736
2019-01-11 07:30:00	0	0	0	0	0	0	4.63333	239.467	0	5.47467
2019-01-11 07:45:00	0	0	0	0	0	0	5.93333	118.4	0	6.01
2019-01-11 08:00:00	0	0	0	0	0	0	5.01333	4.6	0	5.16333
2019-01-11 08:15:00	0	0	0	0	0	0	4.08667	31.5333	0	4.24867
2019-01-11 08:30:00	0	0	0	0	0	0	3.20667	11.9333	0	2.07933
2019-01-11 08:45:00	0	0	0	0	0	0	3.98667	6.06667	0	1.89733
2019-01-11 09:00:00	0	31.8467	0	94.62	1.71333	85.6933	4.88667	352.333	1.03333	2.64133
2019-01-11 09:15:00	0	100.067	0	281.687	4.82	256.307	5.03333	345	3.14667	3.13733
2019-01-11 09:30:00	0	102.8	0	280.08	4.60667	253.187	5.06667	117.933	3.52667	3.38533
2019-01-11 09:45:00	0	103.807	0	277.533	4.39333	251.433	4.6	27.4	3.98	2.264
2019-01-11 10:00:00	0	98.98	0	278.007	3.74667	254.593	4.24667	192.267	4.01333	1.154
2019-01-11 10:15:00	0	101.553	0	273.113	3.28	247.833	3.84	238.333	4.2	0.645333
2019-01-11 10:30:00	0	102.927	0	274.44	4.92667	246.04	3.22667	143.133	4.60667	0.632
2019-01-11 10:45:00	0	92.8133	0	282.36	4.16667	256.567	1.62	282.533	4.80667	0.510667
2019-01-11 11:00:00	0	100.987	0	278.753	2.66	248.267	2.68667	322.8	5.21333	0.942
2019-01-11 11:15:00	0	106.673	0	265.62	3.00667	238.727	2.76	123.133	5.5	0.084
2019-01-11 11:30:00	0.32	148.027	0.073333	226.987	1.76	200.633	2.35333	212.733	6.08667	0
2019-01-11 11:45:00	0.24	165.46	0.426667	207.72	1.46667	182.92	2.56667	301.867	6.81333	0
2019-01-11 12:00:00	0.453333	175.84	0.866667	220.24	2.72	174.127	1.86667	225.067	6.74	0
2019-01-11 12:15:00	0.72	165.6	0.706667	222.167	2.55333	188.907	2.28667	86.8	6.68667	0
2019-01-11 12:30:00	1.71333	150.627	1.73333	229.72	3.61333	199.607	3.39333	83.0667	6.61333	0.054
2019-01-11 12:45:00	1.38667	156.08	1.82	241.227	4.16	212.373	3.69333	193.8	7.11333	0.260667
2019-01-11 13:00:00	1.76	140.453	2.00667	229.847	3.76	207.46	3.21333	192.333	7.16667	0.316667
2019-01-11 13:15:00	1.70667	156.68	2.50667	227.887	3.21333	194.12	3.5	168.333	7.38	0.182667
2019-01-11 13:30:00	1.28	175.593	1.54667	214.013	3.17333	185.94	3.16	348.667	7.20667	0.163333
2019-01-11 13:45:00	0.96	179.307	1.34667	216.333	2.76667	191.427	2.85333	325.333	7.16667	0.122667
2019-01-11 14:00:00	0.506667	172.967	0.86	202.1	2.09333	184.327	1.66	199.6	7.04667	0.027333
2019-01-11 14:15:00	0.48	222.207	0.5	139.367	1.89333	145.313	2.15333	274.333	7.19333	0.126
2019-01-11 14:30:00	0.266667	135.667	0.486667	232.247	3.39333	202.693	3.4	125.133	7.96	0.132
2019-01-11 14:45:00	0.32	149.913	0.22	250.3	3.56667	215.413	3.3	211.267	7.87333	0.158
2019-01-11 15:00:00	0.24	158.573	0.593333	234.513	3.06	217.873	3.08667	188.533	7.98	0.244
2019-01-11 15:15:00	0.4	151.287	0.513333	239.3	3.32667	202.54	3.19333	123.867	8.41333	0.132
2019-01-11 15:30:00	0.4	157.353	0.333333	200.227	1.88667	206.1	2.51333	140.533	8.27333	0.156
2019-01-11 15:45:00	0.4	146.733	0.366667	224.16	3.27333	202.26	4.10667	174.133	8.79333	0.04
2019-01-11 16:00:00	0.32	169.387	0.366667	219.653	3.60667	190.347	3.46667	168.8	8.70667	0.039333
2019-01-11 16:15:00	0.24	141.873	0.393333	245.687	3.54667	214.007	3.54	122.667	8.7	0
2019-01-11 16:30:00	0.48	164.147	0.553333	212.887	2.55333	182.513	3.04667	282.2	8.43333	0
2019-01-11 16:45:00	0.453333	166.653	0.44	228.667	2.02667	179.187	2.02	232.533	8.38667	0.17
2019-01-11 17:00:00	0.24	123.46	0.6	248.66	3.22667	212.06	3.5	151.067	8.25333	0.218
2019-01-11 17:15:00	0.08	144.18	0.073333	226.253	2.88	200.133	2.62667	213.8	8.02	0.045333
2019-01-11 17:30:00	0.48	148.74	0.513333	235.987	2.11333	206.407	2.39333	278.267	7.86	0
2019-01-11 17:45:00	0.08	233.1	0.146667	173.8	2.17333	154.807	2.78667	317.133	7.02	0.080667
2019-01-11 18:00:00	0	233.653	0.073333	146.693	3.17333	121.793	3.52667	199.467	6.04667	0.198
2019-01-11 18:15:00	0	233.68	0	145.28	3.87333	126.807	3.92	205.733	5.82	0.779333
2019-01-11 18:30:00	0	238.02	0	147.16	4.28	124.913	3.38	31.0667	5.63333	1.16133
2019-01-11 18:45:00	0	239.707	0	132.547	3.9	110.993	3.27333	165.133	5.37333	1.37067
2019-01-11 19:00:00	0	262.72	0	131.147	4.34	108.147	3.53333	211.133	4.99333	2.40867
2019-01-11 19:15:00	0	245.58	0	135.467	4.82	109.053	4.43333	279.333	4.91333	3.90267
2019-01-11 19:30:00	0	262.747	0	128.173	4.98	106.94	4.73333	303.067	4.57333	3.798
2019-01-11 19:45:00	0	257.02	0	128.427	5.35333	105.88	5.05333	346.4	3.97333	3.64067
2019-01-11 20:00:00	0	248.613	0	133.827	5.9	112.053	5.46	328.867	4.05333	4.84867
2019-01-11 20:15:00	0	245.927	0	138.4	5.68	116.627	5.26667	143.6	4.04	6.41667
2019-01-11 20:30:00	0	247.007	0	136.367	6.24	116.62	5.3	76.4	4.04	7.412
2019-01-11 20:45:00	0	253.88	0	135.873	6	114.787	6.16667	284.933	3.88667	8.08
2019-01-11 21:00:00	0	244.4	0	137.167	5.79333	114.893	5.50667	98.9333	3.68667	8.04
2019-01-11 21:15:00	0	249.833	0	136.86	5.03333	114.84	5.34667	11.2667	3.7	7.19333
2019-01-11 21:30:00	0	259.267	0	132.253	5.36	114.193	5.2	31.0667	3.56	7.16267
2019-01-11 21:45:00	0	256.893	0	131.747	5.14	113.973	5.43333	99.6667	3.29333	7.014
2019-01-11 22:00:00	0	259.64	0	138.72	5.03333	117.52	5.62	58	3.55333	6.692
2019-01-11 22:15:00	0	247.8	0	138.74	5.25333	124.273	5.11333	149.333	3.90667	5.85
2019-01-11 22:30:00	0	249.433	0	140.127	4.66	124.52	5.13333	191.533	4.02	5.718
2019-01-11 22:45:00	0	250.693	0	146.247	5.3	125.167	5.15333	213.667	4.05333	6.17133
2019-01-11 23:00:00	0	247.647	0	139.367	5.40667	120.253	4.78667	261.2	3.92667	5.79133
2019-01-11 23:15:00	0	246.26	0	139.753	5.19333	119.207	4.70667	260.2	3.86667	6.33133
2019-01-11 23:30:00	0	248.5	0	140.407	5.62	118.873	4.95333	282.533	3.93333	6.804
2019-01-11 23:45:00	0	259.847	0	133.187	5.68	112.4	5.10667	345.733	3.78667	6.17
2019-01-12	0	255.667	0	127.58	5.56667	106.747	5.79333	233.133	3.54667	6.44867
2019-01-12 00:15:00	0	259.11	0	126.93	5.63	104.47	6.14	357	3.36	6.658
2019-01-12 00:30:00	0	263.833	0	125.787	6.05333	103.233	6.04667	353.867	3.27333	6.148
2019-01-12 00:45:00	0	259.74	0	125.46	5.89333	102.613	5.86	355.067	3.22667	5.50133
2019-01-12 01:00:00	0	264.653	0	121.853	5.46	99.86	5.69333	353.4	3.06667	5.518
2019-01-12 01:15:00	0	257.253	0	116.667	5.24667	97.68	5.7	328.733	2.82	5.168
2019-01-12 01:30:00	0	275.487	0	110.62	5.14	90.2467	5.18	347.933	2.61333	4.416
2019-01-12 01:45:00	0	269.167	0	114.227	5.08667	94.3533	5.20667	350.333	2.52	3.838
2019-01-12 02:00:00	0	265.68	0	114.02	4.76667	94.1733	5.09333	329.067	2.4	3.46067
2019-01-12 02:15:00	0	270.5	0	116.5	4.60667	98.4867	5.18667	121.4	2.36	3.14533
2019-01-12 02:30:00	0	269.46	0	119.707	4.82	97.3867	5.14667	261.733	2.26667	3.22067
2019-01-12 02:45:00	0	271.02	0	118.713	4.60667	96.1267	5.17333	306.933	2.16	2.35867
2019-01-12 03:00:00	0	271.86	0	113.44	4.39333	95.06	4.95333	328.067	2.07333	2.50467
2019-01-12 03:15:00	0	279.28	0	114.513	4.66	94.2333	5.12	348.667	2.06667	2.848
2019-01-12 03:30:00	0	267.893	0	112.107	4.60667	91.3267	5.06667	322.6	2.04	2.56933
2019-01-12 03:45:00	0	267.62	0	109.353	4.66	85.3267	4.77333	190.867	2.14	2.16867
2019-01-12 04:00:00	0	278.393	0	110.433	4.71333	86.8867	4.50667	357.267	2.26	1.626
2019-01-12 04:15:00	0	274.453	0	106.087	4.71333	84.86	4.39333	332.267	2.38667	1.566
2019-01-12 04:30:00	0	277	0	101.96	4.66	85.2	4.48	355.8	2.49	1.278
2019-01-12 04:45:00	0	263.52	0	104.3	4.34	83.89	4.79	355.8	2.55	1.654
2019-01-12 05:00:00	0	280.34	0	104.013	4.5	80.66	4.68667	353.533	2.40667	2.088
2019-01-12 05:15:00	0	273.547	0	99.26	4.07333	77.1867	4.46	354.4	2.46	1.86467
2019-01-12 05:30:00	0	286.653	0	93.7133	4.02	71.72	4.19333	278.667	2.62	1.37133
2019-01-12 05:45:00	0	292.087	0	84.8267	4.23333	60.0667	4.36667	352.733	2.8	2.132
2019-01-12 06:00:00	0	292.707	0	81.6933	4.87333	54.9067	4.52	341.733	2.73333	3.728
2019-01-12 06:15:00	0	299.4	0	67.62	5.03333	45.9533	4.46	284.533	2.77333	2.83733
2019-01-12 06:30:00	0	311.413	0	57.64	5.08667	40.9933	4.58667	330	2.74	3.13733
2019-01-12 06:45:00	0	307.907	0	57.4	5.68	36.9467	5.21333	352.133	2.79333	5.97
2019-01-12 07:00:00	0	323.067	0	52.8267	6.01333	30.5867	5.66667	346	2.68667	8.23867
2019-01-12 07:15:00	0	323.74	0	47.8667	6.64	29.1267	6.12667	346.4	2.66	10.5227
2019-01-12 07:30:00	0	321.02	0	55.08	7.31333	25.3	6.64667	343.8	2.72	13.262
2019-01-12 07:45:00	0	308.4	0	56.9667	8.34	25.72	7.36	307.067	2.85333	14.3173
2019-01-12 08:00:00	0	310.433	0	55.2333	8.07333	28.3133	7.3	26.5333	2.96667	14.0813
2019-01-12 08:15:00	0	292.333	0	52.38	6.46667	32.2533	5.95333	11.4667	2.99333	9.38067
2019-01-12 08:30:00	0	291.18	0	78.66	5.79333	47.6733	5.23333	214.267	3.10667	5.98667
2019-01-12 08:45:00	0.12	255.19	0.11	48.33	5.48	27.08	5.2	315.5	3.14	5.592
2019-01-12 09:00:00	0	204.98	0	43.7	5.94	16.5067	5.46667	346.6	3.03333	5.326
2019-01-12 09:15:00	0	327.467	0	45.3533	4.28	20.1467	3.99333	351.867	3.20667	2.15
2019-01-12 09:30:00	0	251.573	0.133333	34.6133	5.19333	8.82	4.28667	120.2	3.60667	1.85733
2019-01-12 09:45:00	0	168.373	0	25.98	4.07333	7.74	3.35333	150.6	3.9	0.432667
2019-01-12 10:00:00	0	277.867	0	54.0867	3.57333	11.1	2.88	73.3333	4.15333	0.016667
2019-01-12 10:15:00	0.24	287.56	0	53.58	3.22667	28.5	2.84667	5.66667	4.44	0.121333
2019-01-12 10:30:00	0	305.733	0	83.58	3.44667	47.5467	3.04667	236	4.68667	0.129333
2019-01-12 10:45:00	0.213333	233.433	0	52.4133	1.94667	54.3533	2.27333	255.8	4.86667	0
2019-01-12 11:00:00	0.08	60.9667	0.146667	243.187	1.92	314.093	1.64	314.267	5.17333	0
2019-01-12 11:15:00	0.373333	66.82	0.073333	302.033	1.49333	318.833	1.82	270.467	5.17333	0
2019-01-12 11:30:00	0.08	132.453	0.073333	282.687	1.25333	234.247	1.82667	197.4	5.80667	0
2019-01-12 11:45:00	0.56	162.64	0.826667	201.82	1.68	227.667	2.34667	210.6	6.52667	0
2019-01-12 12:00:00	0.693333	101.66	0.84	259.76	1.94667	259.907	1.77333	283.667	6.7	0
2019-01-12 12:15:00	0.72	105.487	0.593333	244.107	2.29333	269.067	1.86667	282.067	7.03333	0
2019-01-12 12:30:00	0.4	61.3933	0.633333	240.133	2.19333	310.147	2.53333	291.2	7.15333	0
2019-01-12 12:45:00	0.613333	87.2067	0.5	298.14	2.38	284.007	1.81333	190.667	7.01333	0
2019-01-12 13:00:00	0.4	79.0667	0.613333	309.907	2.03333	301.553	1.72667	185	7.5	0
2019-01-12 13:15:00	0.373333	123.46	0.426667	203.293	2.4	262.013	2.14	182.2	7.77333	0.079333
2019-01-12 13:30:00	0.133333	93.9867	0.28	269.107	2.64	236.567	2.11333	293.867	8.26	0.083333
2019-01-12 13:45:00	0.24	106.373	0.366667	272.82	2.65333	250.527	1.94667	279.133	7.59333	0
2019-01-12 14:00:00	0.4	137.953	0.62	251.3	1.56	228.253	2.19333	242.6	8.36667	0
2019-01-12 14:15:00	0	81.3333	0	298.153	3.17333	274.16	1.91333	168.2	8.14	0
2019-01-12 14:30:00	0	93.5733	0	270.453	2.38	270.76	1.56	193.667	7.81333	0
2019-01-12 14:45:00	0.24	124.68	0	260.767	2.27333	232.713	1.94667	327.467	8.26667	0
2019-01-12 15:00:00	0.08	111.68	0.073333	264.487	3.11333	240.087	2.75333	289.8	8.26667	0
2019-01-12 15:15:00	0	105.433	0.073333	271.627	3.90667	240.573	2.58667	190.267	8.81333	0.080667
2019-01-12 15:30:00	0	123.087	0.073333	261.847	4.32667	228.953	3.00667	192.467	8.83333	0.312
2019-01-12 15:45:00	0.16	112.907	0.26	261.407	4.49333	225.393	3.79333	213.733	8.89333	0.922667
2019-01-12 16:00:00	0	133.353	0.073333	249.88	4.11333	218.327	3.35333	189.933	8.82	0.721333
2019-01-12 16:15:00	0	125.113	0	248.013	4.12	220.027	3.29333	74.8667	8.77333	0.854667
2019-01-12 16:30:00	0	111.687	0.073333	253.48	4.01333	223.433	3.5	122.933	8.64667	0.993333
2019-01-12 16:45:00	0	108.08	0	267.467	4.55333	241.133	3.40667	145.733	8.57333	1.328
2019-01-12 17:00:00	0	104.653	0	264.747	4.39333	238.353	3.44667	138.867	8.28	1.07067
2019-01-12 17:15:00	0	118.22	0	254.32	4.5	222.96	3.97333	168.067	8.16667	1.10533
2019-01-12 17:30:00	0	111.393	0	261	4.12667	229.76	3.79333	263.067	7.84667	0.985333
2019-01-12 17:45:00	0	109.427	0	261.427	4.07333	235.153	3.29333	284.667	7.4	0.489333
2019-01-12 18:00:00	0	127.14	0	252.333	3.51333	228.293	2.63333	257.333	7.14	0
2019-01-12 18:15:00	0	134.18	0	253.673	3.1	230.66	2.76667	167.6	6.94667	0
2019-01-12 18:30:00	0	131.187	0	249.24	3.04	226.693	2.71333	121.733	6.90667	0
2019-01-12 18:45:00	0	122.72	0	256.927	3.58	231.807	2.51333	144.467	6.92667	0
2019-01-12 19:00:00	0	126.007	0	255.04	2.92	232.64	2.44	56.3333	6.94667	0
2019-01-12 19:15:00	0	121.813	0	255.453	3.16	230.96	2.47333	28.0667	6.94	0
2019-01-12 19:30:00	0	117.32	0	257.587	2.81333	235.713	2.25333	15.4	7.04667	0
2019-01-12 19:45:00	0	105.82	0	265.56	2.59333	242.893	2.29333	26.4667	6.81333	0
2019-01-12 20:00:00	0	112.353	0	264.687	2.26667	239.28	1.88	17.3333	6.95333	0
2019-01-12 20:15:00	0	130.907	0	253.56	2.37333	232.147	1.92	124.667	7.04667	0
2019-01-12 20:30:00	0	139.193	0	247.793	2.8	219.04	2.12	280.867	6.84	0
2019-01-12 20:45:00	0.16	141.013	0.366667	238.153	2.16	214.7	1.82	339.2	6.56667	0
2019-01-12 21:00:00	0.24	146.94	0.22	224.92	2.05333	207.48	2	341.733	6.50667	0
2019-01-12 21:15:00	0	144.213	0.073333	240.133	2.76	216.82	2.59333	276.2	6.52667	0
2019-01-12 21:30:00	0	147.3	0	235.64	3.46	211.447	3.1	168.733	6.34667	0.525333
2019-01-12 21:45:00	0	148.047	0	232.04	3.78667	206.113	3.82	347.733	6.08667	1.31733
2019-01-12 22:00:00	0	140.753	0	241.64	3.46	214.567	3.17333	354.333	5.89333	0.955333
2019-01-12 22:15:00	0	145.427	0	236.22	3.79333	211.047	3.27333	330.467	5.74	1.71733
2019-01-12 22:30:00	0	132.613	0	244.707	4.66	218.827	4.28	73.2	5.33333	3.044
2019-01-12 22:45:00	0	131.94	0	249.187	4.5	227.047	3.56	31.8	4.96667	1.23333
2019-01-12 23:00:00	0	128.413	0	257.427	3.57333	239.107	3.02	146.733	4.88667	0.599333
2019-01-12 23:15:00	0	113.073	0	269.34	3.7	246.66	3.32667	58	4.93333	1.24133
2019-01-12 23:30:00	0	106.213	0	275.5	3.68	256.787	3.48	27.8667	4.82667	1.53467
2019-01-12 23:45:00	0	99.8733	0	284.527	3.91333	260.08	4.09333	167.6	4.73333	2.02667
2019-01-13	0	90.62	0	288.393	4.39333	259.467	4.06667	1.8	4.73333	1.57
2019-01-13 00:15:00	0	82.2133	0	291.647	4.5	260.013	3.76667	6.8	4.72	1.11667
2019-01-13 00:30:00	0	81.2867	0	291.3	4.87333	258.24	3.56	27.6	4.68	0.519333
2019-01-13 00:45:00	0	98.5133	0	278.713	4.71333	248.1	3.74667	325.267	4.78667	1.00667
2019-01-13 01:00:00	0	107.413	0	273.36	4.92667	246.147	4.34667	29.4667	4.83333	2.67733
2019-01-13 01:15:00	0	109.887	0	273.82	4.82	248.1	4.54667	168.267	4.71333	4.22933
2019-01-13 01:30:00	0	104.427	0	274.56	4.76667	246.393	4.35333	26.4667	4.76	3.90533
2019-01-13 01:45:00	0	110.813	0	271.653	4.71333	244.713	4.40667	213.8	4.81333	4.45267
2019-01-13 02:00:00	0	100.487	0	281.42	4.71333	254.607	4.41333	9.8	4.52	4.08733
2019-01-13 02:15:00	0	102.287	0	279.993	4.66	248.44	4.56	120.6	3.92	4.194
2019-01-13 02:30:00	0	100.76	0	278.873	3.84667	246.12	4.35333	74.0667	3.66667	3.82133
2019-01-13 02:45:00	0	100.833	0	276.507	4.34	250.707	4.36667	102	3.56667	3.79533
2019-01-13 03:00:00	0	91.6333	0	287.567	4.66	259.993	4.21333	325.8	3.30667	4
2019-01-13 03:15:00	0	107.807	0	277.387	3.8	251.447	4.38667	47.8667	3.44667	3.40667
2019-01-13 03:30:00	0	111.187	0	271.88	4.66	251.807	4.63333	122.267	3.56	3.57467
2019-01-13 03:45:00	0	95.2867	0	287.58	5.03333	261.213	4.74667	13.6	3.38667	4.122
2019-01-13 04:00:00	0	102.247	0	282.633	5.03333	257.713	4.49333	7.13333	3.66667	3.676
2019-01-13 04:15:00	0	94.3533	0	291.007	5.14	261.18	4.21333	10.8667	3.51333	3.02
2019-01-13 04:30:00	0	83.1667	0	296.567	5.35333	260.513	3.99333	13.8667	3.76	2.45133
2019-01-13 04:45:00	0	79.4267	0	297.3	4.34	258.207	3.80667	12	4.06667	1.54667
2019-01-13 05:00:00	0	81.8667	0	294.853	3.79333	254.473	3.38667	11.2667	4.39333	0.537333
2019-01-13 05:15:00	0	103.927	0	284.58	3.04667	248.307	3.25333	5.66667	4.94	0.092
2019-01-13 05:30:00	0	101.473	0	281.84	3.46	249.82	3.3	28.6667	5.09333	0.189333
2019-01-13 05:45:00	0	95.7733	0	280.573	3.46	252.087	3.14	5.6	4.97333	0.104
2019-01-13 06:00:00	0.08	104.227	0	278.927	3.28	251.76	3.33333	5.46667	5.22667	0.183333
2019-01-13 06:15:00	0	92.8667	0	285.56	3.28	255.447	2.91333	58.1333	5	0
2019-01-13 06:30:00	0	84.1467	0	298.307	3.34	263.113	2.66667	5.13333	5.26667	0
2019-01-13 06:45:00	0.08	66.5333	0	304.833	3.1	268.453	2.68	192.2	5.52667	0
2019-01-13 07:00:00	0	53.5667	0	311.893	2.69333	271.88	2.59333	97.4667	5.51333	0
2019-01-13 07:15:00	0.293333	25.3	0.073333	327.433	2.16	280.3	2.38667	26.2	5.62	0
2019-01-13 07:30:00	0.08	40.16	0.073333	320.093	2.37333	284.387	2.31333	307	5.94667	0
2019-01-13 07:45:00	0.56	43.1	0	320.08	1.73333	284.187	1.60667	345.667	5.99333	0
2019-01-13 08:00:00	0	43.0467	0	320.087	1.52	283.727	1.16667	342.867	5.9	0
2019-01-13 08:15:00	0.08	324.187	0.073333	274.553	0	283.8	0.933333	236.4	5.64	0
2019-01-13 08:30:00	0	319.36	0	65.56	0	234.147	0.886667	184.067	4.94	0
2019-01-13 08:45:00	0	321.167	0	59.1867	0.4	34.28	0.52	166.467	5.10667	0
2019-01-13 09:00:00	0	317.733	0	57.5533	1.44	38.7667	0.28	208.4	5.08	0
2019-01-13 09:15:00	0	325.967	0	55.1133	0.853333	31.3533	0.28	323.067	5.54	0
2019-01-13 09:30:00	0	303.86	0	63.36	2.54	34.8133	0.366667	137.667	5.36	0
2019-01-13 09:45:00	0	296.96	0	67.4	3.28	39.24	1.18667	138.6	5.02	0
2019-01-13 10:00:00	0	291.153	0	85.3867	3.85333	50.46	2.46	148.533	4.66	0
2019-01-13 10:15:00	0.08	282.327	0	92.22	4.12667	53.64	3.74667	232.2	4.96	0.002
2019-01-13 10:30:00	0	290.633	0	94.9133	3.90667	69.6467	3.60667	214.067	4.88	0.112667
2019-01-13 10:45:00	0	283.153	0	101.047	3.56667	76.44	3.56	29.4667	5.16667	0.328
2019-01-13 11:00:00	0.16	276.853	0	104.347	3.79333	81.9933	3.67333	7.53333	5.22	0.468667
2019-01-13 11:15:00	0	263.893	0	111.573	4.07333	84.3667	3.9	241.067	5.5	0.636
2019-01-13 11:30:00	0.08	281.573	0	106.573	4.28667	81.4333	4.05333	350.533	5.54667	0.971333
2019-01-13 11:45:00	0.08	264.94	0	116.053	4.44667	85.4067	4.37333	349.133	5.44	1.566
2019-01-13 12:00:00	0.08	280.993	0.353333	106.52	4.55333	81.74	4.46667	303.933	5.94	1.916
2019-01-13 12:15:00	0.24	300.267	0.293333	106.073	4.76667	79.38	4.35333	120.067	6.32667	1.51733
2019-01-13 12:30:00	0	272.94	0.373333	102.82	4.66	84.9667	3.93333	168.467	6.74667	0.956667
2019-01-13 12:45:00	0.08	274.293	0.073333	101.48	4.23333	84.6267	3.8	168.6	6.95333	0.67
2019-01-13 13:00:00	0.24	261.24	0.146667	105.593	4.60667	86.2933	3.82	101.267	7.27333	0.803333
2019-01-13 13:15:00	0	283	0.073333	101.527	4.55333	87.64	3.77333	124.333	7.22	0.839333
2019-01-13 13:30:00	0.16	273.467	0.313333	108.453	4.17333	83.7667	3.49333	148.067	7.29333	0.672667
2019-01-13 13:45:00	0.08	294.567	0.22	97.4867	4.55333	81.86	3.64667	122.533	7.28	0.789333
2019-01-13 14:00:00	0	258.867	0.426667	116.693	4.64667	87.88	3.70667	100.733	7.86667	1.18867
2019-01-13 14:15:00	0.08	250.193	0.073333	109.853	4.82	84.2467	3.35333	238.533	7.71333	1.07133
2019-01-13 14:30:00	0.08	246.6	0.446667	97.4533	4.92667	78.3067	3.5	257.933	8.06667	0.982
2019-01-13 14:45:00	0.16	250.953	0	105.42	4.42667	83.56	3.63333	213.133	7.76667	1.25467
2019-01-13 15:00:00	0.16	262.227	0.073333	99.7	5.58	80.78	4.12667	145.267	8.1	1.48
2019-01-13 15:15:00	0	267.667	0.146667	118.093	4.77333	95.8533	4.06667	214.6	7.70667	0.936667
2019-01-13 15:30:00	0.08	233.647	0.073333	122.247	4.76667	96.92	3.38	258.133	7.97333	1.21267
2019-01-13 15:45:00	0.08	270.733	0.3	112.98	4.82	81.7667	3.99333	261.6	8.32667	1.69333
2019-01-13 16:00:00	0.16	260.053	0.386667	108.393	4.5	89.0933	3.83333	55.8667	8.08667	1.76933
2019-01-13 16:15:00	0.08	239.967	0.813333	113.907	5.03333	84.4333	3.43333	216.667	8.18667	1.788
2019-01-13 16:30:00	0.24	245.947	0.133333	113.98	5.26	89.4	3.62	100.733	7.92667	2.55
2019-01-13 16:45:00	0.24	237.333	0.566667	103.64	6.46	81.1867	4.74667	188.8	7.43333	3.50267
2019-01-13 17:00:00	0	252.96	0	109.273	6.06	84.26	4.58	9.86667	6.44	3.07
2019-01-13 17:15:00	0	250.927	0	103.987	5.56667	82.14	4.50667	30.4667	6.06667	2.332
2019-01-13 17:30:00	0	252.987	0	108.573	5.56667	83.98	4.31333	9.26667	5.65333	2.01333
2019-01-13 17:45:00	0	282.52	0	107.94	5.46	82.1667	4.38	6.46667	5.21333	2.08067
2019-01-13 18:00:00	0	277.273	0	106.207	5.72667	81.6867	4.28667	6.33333	4.74	1.87867
2019-01-13 18:15:00	0	270.813	0	105.313	5.51333	81.06	4.46	2.46667	4.26667	2.00667
2019-01-13 18:30:00	0	266.047	0	116.593	5.68	85.7333	4.51333	27.1333	3.83333	1.93667
2019-01-13 18:45:00	0	281.513	0	115.927	5.51333	88.4933	4.62667	96.9333	3.38	1.96133
2019-01-13 19:00:00	0	255.747	0	115.18	5.83333	88.5267	4.88	73.9333	3.29333	2.584
2019-01-13 19:15:00	0	254.107	0	115.113	5.94	87.26	5.03333	6.53333	3.14	2.76267
2019-01-13 19:30:00	0	254.467	0	117.78	5.78	91.4667	4.92	13.9333	3.02	2.81733
2019-01-13 19:45:00	0	258.76	0	118.247	5.40667	91.1867	4.77333	310.267	2.88667	3.004
2019-01-13 20:00:00	0	272.34	0	114.753	4.76667	88.78	4.42	350.267	3.02	2.332
2019-01-13 20:15:00	0	275.247	0	103.98	4.76667	81.6467	4.24	186	3.36667	2.04067
2019-01-13 20:30:00	0	281.467	0	97.2267	4.5	75.52	4.30667	214.4	3.62667	2.21933
2019-01-13 20:45:00	0	283.387	0	91.36	4.28667	66.2133	4.12	354.333	3.77333	2.192
2019-01-13 21:00:00	0	292.62	0	86.7933	4.66	63.48	4.19333	351.733	3.89333	2.32133
2019-01-13 21:15:00	0	294.833	0	87.0067	4.60667	59.32	4.19333	350.6	3.98667	2.40733
2019-01-13 21:30:00	0	302.86	0	81.2733	4.87333	58.9267	4.52	346.8	4.05333	2.47267
2019-01-13 21:45:00	0	285.28	0	84.9867	4.60667	57.3533	4.64	321.8	4.06667	2.91133
2019-01-13 22:00:00	0	302.633	0	78.4333	3.96	53.5	4.15333	5.66667	4.14667	2.044
2019-01-13 22:15:00	0	290.28	0	86.7533	3.1	61.76	3.67333	33.9333	4.12667	1.12933
2019-01-13 22:30:00	0.08	288.98	0	87.9133	3.15333	62.1067	3.82	171.2	4.01333	0.954667
2019-01-13 22:45:00	0	297.533	0	84.8267	4.34	55.48	4.18667	351.467	4.04667	1.29733
2019-01-13 23:00:00	0.08	276.953	0	90.4667	3.22	53.9467	3.72667	350.8	4.23333	1.08667
2019-01-13 23:15:00	0	295.667	0.073333	79.8733	3.96	56.16	3.53333	304.733	4.28667	0.656
2019-01-13 23:30:00	0	313.207	0	74.0333	3.62667	54.4733	3.50667	352.4	4.28667	0.670667
2019-01-13 23:45:00	0	311.9	0	74.1	3.84667	54.4067	3.48	353.267	4.22667	0.720667
2019-01-14	0	311.78	0	73.04	3.72667	58.1467	2.83333	330.467	4.52	0.167333
2019-01-14 00:15:00	0	321.747	0	67.9733	3.09333	52.4533	2.42667	341	4.88	0
2019-01-14 00:30:00	0	314.387	0	62.4133	2.92	44.4133	2.64	297.067	4.95333	0
2019-01-14 00:45:00	0	308.487	0	48.5467	3.28	34.5667	2.78	283.467	4.76667	0
2019-01-14 01:00:00	0	252.487	0	36.1267	2.98667	26.9667	2.81333	237.467	4.63333	0
2019-01-14 01:15:00	0	279.027	0	32.4533	2.86667	13.3	2.33333	142.2	4.75333	0
2019-01-14 01:30:00	0	320.893	0	33.06	3.74	12.1067	2.52667	279.733	4.62667	0
2019-01-14 01:45:00	0	232.34	0	31.06	3.22	9.16667	3.14667	191.067	4.67333	0
2019-01-14 02:00:00	0	281.727	0	31.56	2.92	2.89333	3.04667	28	4.93333	0
2019-01-14 02:15:00	0	282.313	0	31.6133	2.98	7.78	2.76	79.3333	5.08	0
2019-01-14 02:30:00	0	210.187	0	26.7533	3.1	5.12	2.62	232.867	5.18	0
2019-01-14 02:45:00	0	121.253	0	19.3733	2.92	47.66	2.54667	143.067	5.25333	0
2019-01-14 03:00:00	0	22.9533	0	74.56	2.5	341.967	2.58667	336.533	5.24667	0
2019-01-14 03:15:00	0	40.9	0	352.24	2.92	331.1	3.14	327.4	5.02667	0
2019-01-14 03:30:00	0.16	48.9667	0.266667	338.44	2.75333	323.467	2.63333	187.533	5.1	0
2019-01-14 03:45:00	0.08	49.9533	0.146667	332.34	3.16	315.68	3.01333	239.933	5.04	0
2019-01-14 04:00:00	0.08	33.9867	0	227.96	2.99333	326.48	3.14667	308.2	4.84667	0
2019-01-14 04:15:00	0	20.94	0	72.0533	3.90667	338.107	3.38	166.667	4.64	0.237333
2019-01-14 04:30:00	0	33.0067	0	350.38	3.16	320.913	3.13333	329.667	4.67333	0.210667
2019-01-14 04:45:00	0	33.6133	0	349.3	3.51333	320.467	3.42	238	4.72	0.240667
2019-01-14 05:00:00	0	23.6667	0	350.153	3.69333	325.9	3.55333	143.267	4.78667	0.346
2019-01-14 05:15:00	0	21.1533	0	353.313	3.91333	327.58	3.94667	214.733	4.74667	0.872667
2019-01-14 05:30:00	0	57.3	0	81.2333	5.08667	253.407	4.98	10.3333	4.92	1.94533
2019-01-14 05:45:00	0	227.987	0	37.2533	5.73333	9.16	5.61333	172.6	5.39333	5.19933
2019-01-14 06:00:00	0	119.547	0	26.8667	5.35333	75.3867	5.30667	326	5.42	4.628
2019-01-14 06:15:00	0	257.693	0	17.42	4.66	327.467	5.18667	122.733	5.47333	4.34333
2019-01-14 06:30:00	0	231.793	0	29.7067	4.28667	5.22667	4.38	217.733	5.37333	5.066
2019-01-14 06:45:00	0	188.5	0	27.48	4.23333	144.213	4.12667	345.733	5.21333	4.42733
2019-01-14 07:00:00	0	232.547	0	26.4933	4.55333	25.38	4.6	346.467	5.2	4.002
2019-01-14 07:15:00	0	283.9	0	27.9133	4.76667	97.2867	4.93333	347.133	5.06	4.19133
2019-01-14 07:30:00	0	150.227	0	19.5267	5.08667	284.073	5.58	122.267	5.02	5.61467
2019-01-14 07:45:00	0	167.653	0	61.8	5.69333	306.293	6.51333	144.2	4.93333	7.534
2019-01-14 08:00:00	0	12.9333	0	11.78	5.03333	326.707	5.41333	190.933	4.81333	7.042
2019-01-14 08:15:00	0	40.2	0	57.58	4.98	324.533	5.39333	214.467	4.60667	5.78533
2019-01-14 08:30:00	0	63.0867	0	122.04	4.22667	347.207	5.10667	168.2	4.50667	4.99533
2019-01-14 08:45:00	0	81.66	0	33.4533	5.3	336.46	5.91333	168.867	4.45333	5.724
2019-01-14 09:00:00	0	61.3333	0	79.6133	6.74667	328.767	7.00667	73.2	4.48667	6.868
2019-01-14 09:15:00	0	39.62	0	34.2067	6.47333	327.293	7.19333	49.4667	4.51333	8.02667
2019-01-14 09:30:00	0	36.24	0	29.9267	6.48	344.613	7.26667	48.6667	4.59333	8.954
2019-01-14 09:45:00	0	42.3133	0	53.7933	6.37333	347.86	7.61333	168.2	4.50667	10.0307
2019-01-14 10:00:00	0	34.8333	0	10.6267	7.02	349.853	7.96	49.8	4.53333	11.154
2019-01-14 10:15:00	0	69.7867	0	37.2	7.36667	212.447	8.11333	4.26667	4.62667	11.5713
2019-01-14 10:30:00	0	237.093	0	24.52	7.30667	98.1733	8	98.9333	4.74	11.46
2019-01-14 10:45:00	0	263.38	0	41.1267	6.98	15.5	8.01333	52.0667	4.79333	11.8887
2019-01-14 11:00:00	0	269.087	0	48.6733	7.68667	19.6133	8.53333	334.067	4.76667	14.804
2019-01-14 11:15:00	0	289.38	0	50.64	6.79333	20.1067	8.28667	355.933	4.82	13.6207
2019-01-14 11:30:00	0	249.693	0	46	7.50667	18.6533	8.34	354.8	4.92	13.5327
2019-01-14 11:45:00	0	262.52	0	54.5133	6.96667	17.1067	8.03333	306.533	5.01333	10.48
2019-01-14 12:00:00	0	258.893	0	57.7267	7.08667	29.5333	6.92667	3.53333	5.04	9.97267
2019-01-14 12:15:00	0	299.387	0	62.0867	7.54	27.3733	7.73333	51.0667	5.02667	11.5007
2019-01-14 12:30:00	0	305.047	0	64.7733	6.62	31.9733	7.12	122.067	5.13333	10.3733
2019-01-14 12:45:00	0	305.813	0	67.7333	5.31333	35.12	5.97333	238.067	5.02667	9.06333
2019-01-14 13:00:00	0	304.48	0	65.9933	6.24667	33.4067	6.72	192.8	5.24	8.80067
2019-01-14 13:15:00	0	297.66	0	83.4467	6.74667	37.3067	6.35333	8.33333	5.36667	6.766
2019-01-14 13:30:00	0	303.18	0	84.48	6.35333	48.94	6.27333	13.2667	5.48667	7.332
2019-01-14 13:45:00	0	297.64	0	77.0933	6.06	44.3933	6.04667	13.8	5.53333	6.24533
2019-01-14 14:00:00	0	292.18	0	81.5533	6.46	49.92	6.17333	194	5.72	7.598
2019-01-14 14:15:00	0	283.593	0	76.1667	6.06	51.9267	6.3	349	5.95333	8.248
2019-01-14 14:30:00	0	295.64	0	85.4333	5.75333	52.9333	5.48667	348.6	6.07333	8.796
2019-01-14 14:45:00	0	314.533	0	67	5.46667	42.4533	5.82667	323	6.08667	8.80133
2019-01-14 15:00:00	0	308.84	0	62.4133	6.36	36.9	6.5	344.8	6.1	7.5
2019-01-14 15:15:00	0	174.427	0	35.92	3.44	20.3733	6.15333	347.067	3.2	6.168
2019-01-14 15:30:00	0	0	0	0	0	0	5.80667	350.133	0	6.40333
2019-01-14 15:45:00	0	0	0	0	0	0	5.36667	348.4	0	6.284
2019-01-14 16:00:00	0	0	0	0	0	0	5.08	349.4	0	6.08267
2019-01-14 16:15:00	0	0	0	0	0	0	5.83333	347.067	0	6.052
2019-01-14 16:30:00	0	0	0	0	0	0	6.10667	349.533	0	5.06
2019-01-14 16:45:00	0	0	0	0	0	0	6.36	329.533	0	5.33467
2019-01-14 17:00:00	0	0	0	0	0	0	6.34667	327.667	0	6.10067
2019-01-14 17:15:00	0	0	0	0	0	0	6.36	330.867	0	6.54267
2019-01-14 17:30:00	0	0	0	0	0	0	6.26667	260.2	0	6.42133
2019-01-14 17:45:00	0	0	0	0	0	0	6.74667	326.933	0	8.10267
2019-01-14 18:00:00	0	0	0	0	0	0	6.11333	344.867	0	6.16867
2019-01-14 18:15:00	0	0	0	0	0	0	5.76	326.533	0	5.20133
2019-01-14 18:30:00	0	294.247	0	71.4267	5.79333	43.5467	5.06667	189.133	5.89333	4.77333
2019-01-14 18:45:00	0	277.847	0	84.4267	5.14	55.8333	5.18667	214.533	5.54	4.76467
2019-01-14 19:00:00	0	272.453	0	92.7267	5.40667	54.56	5.16667	191.133	5.18	5.22133
2019-01-14 19:15:00	0	257.533	0	102.347	5.19333	63.44	5.40667	54.4	4.82	5.87867
2019-01-14 19:30:00	0	192	0	109.733	4.92667	74.72	4.82	149.8	4.62	5.45133
2019-01-14 19:45:00	0	234.613	0	112.753	4.55333	77.2733	4.70667	168	4.57333	4.028
2019-01-14 20:00:00	0	236.713	0	117.413	3.95333	83.26	4.01333	27.2	4.6	3.34067
2019-01-14 20:15:00	0	265.147	0	116.827	3.04667	78.4933	3.13333	284	4.64	1.74267
2019-01-14 20:30:00	0	268.1	0.513333	100.727	2.59333	60.5733	3	344.333	4.87333	0.285333
2019-01-14 20:45:00	0	295.78	0.206667	98.76	2.78	59.9467	3.06	121.867	5.10667	0.202
2019-01-14 21:00:00	0	213.753	0.146667	157.153	1.8	48.3	3.42667	281.267	5.18	0.445333
2019-01-14 21:15:00	0	139.48	0	38.0267	5.69333	110.567	5.42667	212.867	5.76667	2.17
2019-01-14 21:30:00	0	277.72	0	50.74	7.08	21.84	6.88	283.2	6.54667	5.166
2019-01-14 21:45:00	0	291.96	0	45.1267	6.74667	21.38	6.49333	325.933	6.75333	5.61467
2019-01-14 22:00:00	0	297.427	0	60.06	5.74667	17.5	6.41333	303.733	6.66	4.918
2019-01-14 22:15:00	0	317.72	0	61.9667	6.30667	30.7867	6.57333	307.267	6.60667	5.83533
2019-01-14 22:30:00	0	309.487	0	68.8533	5.84	36.02	6.40667	74.5333	6.44	7.73267
2019-01-14 22:45:00	0.08	295.547	0.206667	64.52	5.36667	36.8467	6.38	166.6	6.35333	9.832
2019-01-14 23:00:00	0	313.547	0	57.8333	5.51333	31.94	6.3	142.733	6.36667	8.53067
2019-01-14 23:15:00	0	290.973	0	55.42	6.01333	27.1133	6.86667	353.333	6.40667	10.834
2019-01-14 23:30:00	0	323.08	0	50.2067	6.08667	27.64	7.32	213.733	6.49333	13.916
2019-01-14 23:45:00	0	330.753	0	53.0333	7.69333	24.0533	8.43333	213.867	6.72	24.4987
2019-01-15	0	300.827	0	45.7733	9.07333	24.72	9.45333	145.2	6.90667	27.16
2019-01-15 00:15:00	0	280.253	0	52.94	9.07333	22.3667	9.36667	166.6	6.54667	27.9707
2019-01-15 00:30:00	0	277.66	0	46.8933	8.42667	11.0733	9.49333	236.733	6.24	31.71
2019-01-15 00:45:00	0	317.56	0	38.4933	8.85333	125.4	9.4	307.6	6.40667	31.692
2019-01-15 01:00:00	0	296.027	0	31.4867	9.29333	54.1667	9.83333	145.133	6.56667	33.8207
2019-01-15 01:15:00	0	284.173	0	39.24	9.96	81.5667	10.8733	191.333	6.54667	34.322
2019-01-15 01:30:00	0	255.74	0	40.0933	9.02	56.7267	9.91333	261.733	6.64667	32.3033
2019-01-15 01:45:00	0	294.767	0	46.0733	8.52667	36.2	9.28667	73.5333	6.52667	33.4547
2019-01-15 02:00:00	0	268.027	0	40.2467	8.25333	17.3733	8.81333	27.9333	6.52667	32.4687
2019-01-15 02:15:00	0	307.653	0	49.1133	8.85333	19.7667	9.1	237.533	6.63333	32.9487
2019-01-15 02:30:00	0	284.373	0	43.6133	7.80667	22.8333	8.39333	214.8	6.43333	32.8307
2019-01-15 02:45:00	0	304.733	0	52.3467	8.23333	28.4533	8.46667	97.5333	6.41333	31.972
2019-01-15 03:00:00	0	324.98	0	59.7467	8.36	26.1333	7.58	6.86667	6.4	30.358
2019-01-15 03:15:00	0	293.72	0	54.24	9.74667	24.7733	9.04667	122.933	6.5	30.962
2019-01-15 03:30:00	0	261.633	0	50.76	9.01333	23.3067	9.55333	190.467	6.51333	32.1047
2019-01-15 03:45:00	0	283.72	0	52.22	10.2867	24.18	10.0467	214.6	6.46667	31.7213
2019-01-15 04:00:00	0	321.613	0	60.6067	9.79333	25.38	10.2333	237.933	6.44667	32.9773
2019-01-15 04:15:00	0	304.667	0	64.7133	8.20667	32.48	8.16	191.667	6.36	32.2653
2019-01-15 04:30:00	0	260.093	0	64.28	9.2	34.6667	9.44667	190.933	6.20667	32.3587
2019-01-15 04:45:00	0	296.673	0	73.0333	8.18	37.26	8.44	167.867	6.09333	32.4547
2019-01-15 05:00:00	0	289.947	0	69.6867	8.35333	38.16	8.78667	259.933	5.95333	32.6087
2019-01-15 05:15:00	0	305.16	0	63.18	9.56667	30.8867	9.79333	50.7333	5.94	32.2893
2019-01-15 05:30:00	0	285.16	0	70.26	8.39333	39.54	9.39333	169.067	5.82	33.5853
2019-01-15 05:45:00	0	288.26	0	64.5867	11.2133	35.5267	10.8067	121.867	5.77333	33.4267
2019-01-15 06:00:00	0	308.393	0	64.16	10.9933	36.0667	11.0133	213.467	5.69333	33.5127
2019-01-15 06:15:00	0	291.1	0	62.3667	11.16	34.9	10.7467	283.333	5.59333	33.7487
2019-01-15 06:30:00	0	301.573	0	64.94	12.14	32.9133	11.0867	190.333	5.57333	34.318
2019-01-15 06:45:00	0	302.607	0	64.6267	10.34	31.1067	10.3133	236.533	5.46667	33.2927
2019-01-15 07:00:00	0	305.04	0	50.22	10.5067	27.3933	9.56	192.733	5.4	33.5607
2019-01-15 07:15:00	0	278.12	0	56.26	9.96	26.62	8.98667	74.4667	5.31333	33.6267
2019-01-15 07:30:00	0	256.913	0	53	9.08667	25.7333	8.85333	144.533	5.14667	32.5953
2019-01-15 07:45:00	0	237.873	0	54.5933	8.01333	24.02	7.80667	143.4	5.05333	31.3933
2019-01-15 08:00:00	0	309.327	0	50.0733	8.69333	42.7733	8.06667	328.867	4.98	29.6827
2019-01-15 08:15:00	0	314.3	0	55.0267	8.97333	60.5933	9.22	212.733	4.90667	29.11
2019-01-15 08:30:00	0	317.02	0	47.4067	11.6533	18.4467	11.2933	98.0667	4.77333	30.9513
2019-01-15 08:45:00	0	256.78	0	43.8333	11.44	22.72	11.0333	330.333	4.65333	33.128
2019-01-15 09:00:00	0	310.653	0	45.5	11.02	19.82	10.3	353.333	4.52	32.3807
2019-01-15 09:15:00	0	307.453	0	46.26	7.85333	22.2667	8.82667	238.267	4.35333	30.9667
2019-01-15 09:30:00	0	210.787	0	44.3133	10.3267	22.5667	10.18	98.2667	4.14667	30.022
2019-01-15 09:45:00	0	225.567	0	49.64	10.84	43.2267	10.3	97.5333	3.92667	32.0467
2019-01-15 10:00:00	0	324.313	0	49.2733	10.1267	18.58	9.77333	75.9333	3.66	32.82
2019-01-15 10:15:00	0	282.433	0	44.7733	9.26	18.0733	10.2867	168.133	3.42	32.164
2019-01-15 10:30:00	0	270.7	0	43.1867	10.6667	20.66	11.6667	99.9333	3.12667	31.736
2019-01-15 10:45:00	0	281	0	46.32	11.0667	23.32	11.4333	308.267	3	31.492
2019-01-15 11:00:00	0	298.127	0	55.9467	11.0733	27.76	9.7	286.133	3.01333	30.204
2019-01-15 11:15:00	0	300.66	0	53.3267	10.2333	27.9267	9.19333	145.867	3.01333	29.6587
2019-01-15 11:30:00	0	301.94	0	50.7067	9.95333	27.04	9.24	190.267	3.05333	28.7613
2019-01-15 11:45:00	0	247.387	0	46.8867	10.2867	20.04	10.5	215.333	2.94	26.9787
2019-01-15 12:00:00	0	259.46	0	56.2333	11.1733	27.3867	10.08	51.8	2.93333	27.4007
2019-01-15 12:15:00	0	355.4	0	44	8.6	27.8	8.89333	17.6667	2.9	27.1033
2019-01-15 12:30:00	0	355.4	0	44	8.6	27.8	8.9	18	2.9	25.2787
2019-01-15 12:45:00	0	355.4	0	44	8.6	27.8	8.9	18	2.9	26.396
2019-01-15 13:00:00	0	355.4	0	44	8.6	27.8	8.9	18	2.9	26.1153
2019-01-15 13:15:00	0	355.4	0	44	8.6	27.8	8.9	18	2.9	26.9513
2019-01-15 13:30:00	0	355.4	0	44	8.6	27.8	8.9	18	2.9	27.5653
2019-01-15 13:45:00	0	355.4	0	44	8.6	27.8	8.9	18	2.9	28.0893
2019-01-15 14:00:00	0	355.4	0	44	8.6	27.8	8.9	18	2.9	29.0307
2019-01-15 14:15:00	0	355.4	0	44	8.6	27.8	8.9	18	2.9	29.5647
2019-01-15 14:30:00	0	355.4	0	44	8.6	27.8	8.9	18	2.9	28.6593
2019-01-15 14:45:00	0	355.4	0	44	8.6	27.8	8.9	18	2.9	28.092
2019-01-15 15:00:00	0	355.4	0	44	8.6	27.8	8.9	18	2.9	25.6553
2019-01-15 15:15:00	0	355.4	0	44	8.6	27.8	8.9	18	2.9	25.756
2019-01-15 15:30:00	0	355.4	0	44	8.6	27.8	8.9	18	2.9	24.2013
2019-01-15 15:45:00	0	355.4	0	44	8.6	27.8	8.9	18	2.9	20.9573
2019-01-15 16:00:00	0	355.4	0	44	8.6	27.8	8.9	18	2.9	22.3887
2019-01-15 16:15:00	0	355.4	0	44	8.6	27.8	8.9	18	2.9	20.7133
2019-01-15 16:30:00	0	355.4	0	44	8.6	27.8	8.9	18	2.9	20.2893
2019-01-15 16:45:00	0	355.4	0	44	8.6	27.8	8.9	18	2.9	14.6693
2019-01-15 17:00:00	0	355.4	0	44	8.6	27.8	8.9	18	2.9	12.2167
2019-01-15 17:15:00	0.16	184.82	0.8	103.54	6.96667	72.1067	3.85333	95.8	5.52667	12.2987
2019-01-15 17:30:00	0.08	226.407	0.24	97.9867	7.51333	73.2	6.77333	124.067	4.93333	10.8387
2019-01-15 17:45:00	0	158.073	0	107.047	7.42667	85.0933	6.36	13.1333	4.57333	8.10533
2019-01-15 18:00:00	0	181.513	0	109.847	6.70667	82.6267	6.04	33.4	3.86667	5.61267
2019-01-15 18:15:00	0	150.533	0	100.18	5.78667	72.9267	5.22	76.0667	3.08	3.84133
2019-01-15 18:30:00	0	255.133	0	108.287	4.23333	82.9267	3.7	78.0667	2.50667	1.612
2019-01-15 18:45:00	0	265.893	0	122.413	3.86	94.46	3.16667	73.4	2.07333	0.492667
2019-01-15 19:00:00	0	240.673	0	132.193	3.32667	101.14	2.78667	30.4	2.20667	0.002
2019-01-15 19:15:00	0.08	239.633	0.146667	129.973	2.6	95.66	2.36667	123.867	2.54	0
2019-01-15 19:30:00	0.32	263.593	0.413333	123.087	2.26667	90.9667	2.14667	146	2.85333	0
2019-01-15 19:45:00	0.08	267.3	0.22	111.627	2.21333	81.28	2.37333	340.4	3.16	0
2019-01-15 20:00:00	0.08	267.3	0.573333	111.62	2.42667	70.74	2.30667	342.4	3.21333	0
2019-01-15 20:15:00	0	267.373	0.073333	108.567	1.89333	63.86	2	340.6	3.30667	0
2019-01-15 20:30:00	0	267.36	0	108.1	0.64	62.78	0.96	76.2667	3.30667	0
2019-01-15 20:45:00	0	267.313	0	108.1	0	62.8	0.746667	53.3333	3.16	0
2019-01-15 21:00:00	0	267.313	0	108.1	0	62.8	0.68	184.467	2.98	0
2019-01-15 21:15:00	0	267.307	0	108.1	0	62.7133	0.926667	320.533	2.64	0
2019-01-15 21:30:00	0	267.353	0	108.1	0.4	62.66	1.43333	314.533	2.89333	0
2019-01-15 21:45:00	0	267.373	0	108.053	1.09333	47.4	1.92	327.067	3.22667	0
2019-01-15 22:00:00	0	267.4	0	101.973	1.30667	39.8	1.79333	328.467	3.40667	0
2019-01-15 22:15:00	0.48	337.03	0.33	29.83	1.24	36.85	2.36	327.4	3.47	0
2019-01-15 22:30:00	0	51.9067	0	25.5	2	18.26	2.40667	316.6	3.27333	0
2019-01-15 22:45:00	0	252.507	0	40.8667	2.37333	31.5867	2.24	301.533	3.18	0
2019-01-15 23:00:00	0.08	348.807	0.073333	35.58	2.21333	27.58	2.09333	321.6	3.14667	0
2019-01-15 23:15:00	0.08	169.08	0.22	30	1.62667	18.2267	1.67333	324.133	3.2	0
2019-01-15 23:30:00	0	11.8867	0	3.35333	2.16	342.893	2.48667	291.667	3.06	0
2019-01-15 23:45:00	0	12.98	0	0.8	2.26667	340.92	2.26667	17.1333	2.95333	0
2019-01-16	0	12.7214	0	7.65	2.62857	300.843	1.69286	24.9286	2.70714	0
2019-01-16 00:15:00	0	11.4133	0	12.6067	2.26667	99.8867	1.45333	55.9333	2.7	0
2019-01-16 00:30:00	0.08	25.0067	0.146667	235.267	1.25333	142.607	0.666667	53.9333	2.52667	0
2019-01-16 00:45:00	0.24	75.26	0	309.207	0.986667	319.593	0.28	147.667	2.32667	0
2019-01-16 01:00:00	0.48	116.44	0	276.893	0.56	285.947	0.44	232.133	2.34667	0
2019-01-16 01:15:00	0.4	117.1	0.146667	276.9	0	284	0.813333	218	2.42667	0
2019-01-16 01:30:00	0	117.1	0	276.867	0.533333	212.84	1.68	215.533	2.62667	0
2019-01-16 01:45:00	0	117.1	0	276.9	0	175.3	1.23333	207.067	2.75333	0
2019-01-16 02:00:00	0	117.1	0	276.9	0.266667	186.253	1.15333	227	2.68667	0
2019-01-16 02:15:00	0.08	114.267	0.22	286.58	1.68	253.167	1.52	287.6	2.46	0
2019-01-16 02:30:00	0.24	112.773	0.146667	297.613	1.62667	262.053	1.24667	285.067	2.44667	0
2019-01-16 02:45:00	0.08	53.7467	0.22	326.933	1.33333	286.073	1.41333	314.467	2.42	0
2019-01-16 03:00:00	0.56	37.9	0.293333	326.98	1.30667	306.367	1.72	334.467	2.73333	0
2019-01-16 03:15:00	0.08	28.4467	0	340.813	2.16	314.073	2.42	314.4	2.85333	0
2019-01-16 03:30:00	0	23.5867	0	349.273	2.6	315.2	2.78667	213.733	2.77333	0
2019-01-16 03:45:00	0	22.6667	0	351.153	3.1	319.167	2.94	192.067	2.64	0
2019-01-16 04:00:00	0	22.0867	0	351.027	3.1	320.447	3.19333	214.933	2.68	0
2019-01-16 04:15:00	0	31.5733	0	346.44	2.98667	318.94	2.92	259.467	2.58667	0
2019-01-16 04:30:00	0	16.6667	0	235.373	3.22	328.973	2.75333	96.8	2.5	0
2019-01-16 04:45:00	0	34.4	0	0.686667	3.28	335.44	2.53333	190.467	2.40667	0
2019-01-16 05:00:00	0	4.31	0	5.76	2.81	340.9	2.54	282.5	2.38	0
2019-01-16 05:15:00	0	188.12	0	13.52	2.10667	350.387	2.12	14.1333	2.62667	0
2019-01-16 05:30:00	0	332.26	0	39.92	2.05333	55.9133	1.65333	27.8667	2.18667	0
2019-01-16 05:45:00	0	311.287	0	69.9467	2.48667	42.22	1.83333	59.8667	1.95333	0
2019-01-16 06:00:00	0	318.7	0	74.44	2.76	57.8667	2.24667	79.7333	2.19333	0
2019-01-16 06:15:00	0	312.447	0	80.3133	1.73333	72.06	1.46	74.3333	2.34667	0
2019-01-16 06:30:00	0	280.02	0	100.187	1.57333	83.98	1.38667	83.3333	2.39333	0
2019-01-16 06:45:00	0.16	279.953	0	117.693	1.46667	83.28	0.833333	75.2	2.35333	0
2019-01-16 07:00:00	0	278.527	0	131.747	1.22667	88.32	0.353333	182.067	2.36	0
2019-01-16 07:15:00	0.32	246.467	0.073333	141.293	0.32	132.78	0.66	252.733	2.34	0
2019-01-16 07:30:00	0	201.72	0	179.2	0.48	205.413	1.02	236.067	2.47333	0
2019-01-16 07:45:00	0.533333	214.5	0	177.8	0.64	208.4	1.27333	249.733	2.44667	0
2019-01-16 08:00:00	0	238.747	0	148.673	0.853333	153.08	1.06	208.067	2.23333	0
2019-01-16 08:15:00	0	242.713	0.073333	155.713	1.30667	152.427	1.1	241.333	2	0
2019-01-16 08:30:00	0	213.947	0	208.72	0.213333	166	1.26	214.867	1.8	0
2019-01-16 08:45:00	0	228.913	0	156.447	2.10667	128.04	1.95333	165.867	1.91333	0
2019-01-16 09:00:00	0	248.093	0.206667	139.413	1.46667	137.373	1.77333	199.267	2	0
2019-01-16 09:15:00	0.08	130.393	0.146667	252.113	1.36	219.88	1.26667	261.067	2.08	0
2019-01-16 09:30:00	0.08	99.34	0	280.84	1.68	255.253	1.34	270.733	2.26667	0
2019-01-16 09:45:00	0.16	101.06	0	274.753	1.06667	235.3	1.23333	248.467	2.54	0
2019-01-16 10:00:00	0	104.767	0	261.513	1.22667	229.133	1.33333	259.2	2.68	0
2019-01-16 10:15:00	0	97.8667	0.146667	284.013	1.33333	253.54	1.20667	275.067	2.92667	0
2019-01-16 10:30:00	0	111.18	0.28	268.9	2.10667	224.027	2.32	254.2	3.21333	0
2019-01-16 10:45:00	0	143.46	0.073333	244.38	2	211.427	2.14667	255.867	3.32667	0
2019-01-16 11:00:00	0	126.953	0.146667	246.4	1.86667	224.653	1.75333	262.2	3.38	0
2019-01-16 11:15:00	0	128.273	0	259.447	1.04	228.9	1.11333	241.2	3.61333	0
2019-01-16 11:30:00	0	259.96	0.073333	122.613	2	98.8533	1.2	132.6	3.92	0
2019-01-16 11:45:00	0.08	162.307	0.22	202.693	1.28	146.833	1.31333	203.733	4.04	0
2019-01-16 12:00:00	0.48	219.8	0.486667	116.093	0.986667	167.627	1.46	219.867	4.64	0
2019-01-16 12:15:00	0.24	191.453	0.22	124.553	0.693333	125.34	1.7	221.4	4.62667	0
2019-01-16 12:30:00	0.32	209.487	0.206667	147.513	1.30667	134.247	1.46667	228.733	5.46	0
2019-01-16 12:45:00	0.32	231	0.44	101.507	1.14667	75.8267	1.56667	225.533	4.72	0
2019-01-16 13:00:00	0	210.293	0.146667	61.3867	1.52	66.58	1.00667	148.667	4.34	0
2019-01-16 13:15:00	0.16	287.7	0.28	52.7133	1.22667	40.6267	1.06667	165	4.82	0
2019-01-16 13:30:00	0.24	247.7	0.293333	141.987	0.966667	135.213	1.57333	219.4	4.88	0
2019-01-16 13:45:00	0.346667	174.953	0.293333	198.6	1.01333	178.567	1.02667	246.533	5.47333	0
2019-01-16 14:00:00	0.266667	198.953	0.426667	178.327	1.25333	154.62	1.24	263.067	5.42667	0
2019-01-16 14:15:00	0.08	144.053	0.28	239.2	1.25333	210.58	1.60667	284.533	5.4	0
2019-01-16 14:30:00	0.16	156.507	0.073333	239.847	2.27333	216.013	1.77333	244.733	5.62667	0
2019-01-16 14:45:00	0	126.75	0	254.43	2.42	222.93	2.86	262.2	5.52	0
2019-01-16 15:00:00	0.08	167.167	0.22	221.273	2.16667	192.547	1.9	128.467	5.58667	0
2019-01-16 15:15:00	0.08	188.493	0.146667	156.36	1.38667	126.56	0.906667	105.067	5.62667	0
2019-01-16 15:30:00	0.08	199.48	0.366667	186.647	0.533333	162.36	0.78	154.6	5.70667	0
2019-01-16 15:45:00	0.16	284.347	0.206667	107.72	1.22667	88.66	1.12	259.067	5.60667	0
2019-01-16 16:00:00	0.08	230.727	0.146667	94.1067	1.70667	74.9733	1.68	264.2	5.39333	0
2019-01-16 16:15:00	0.16	298.233	0.56	99.8067	2.21333	77.3067	1.89333	249.867	5.36	0
2019-01-16 16:30:00	0	292.807	0.146667	91.8867	2.27333	70.92	2.24667	248.333	5.23333	0
2019-01-16 16:45:00	0	298.88	0	94.18	2.21333	70.0533	1.92	242.467	5.12667	0
2019-01-16 17:00:00	0	302.22	0.646667	104.427	2	77.5867	1.74	253.133	5.16	0
2019-01-16 17:15:00	0	287.107	0.5	103.107	1.89333	80.6267	1.69333	260.733	5.00667	0
2019-01-16 17:30:00	0.08	283.8	1.19333	102.7	1.73333	78.6867	1.83333	256.6	4.86667	0
2019-01-16 17:45:00	0.08	294.12	0	98.6467	2.32	68.7933	2.46667	235.933	4.70667	0
2019-01-16 18:00:00	0	304.187	0	87.7867	2.32	58.44	2.24667	232.867	4.7	0
2019-01-16 18:15:00	0	310.193	0.073333	67.3533	2.26667	38.1267	2.07333	223.133	4.7	0
2019-01-16 18:30:00	0.24	337.26	0	43.06	2.82	21	2.44	202	4.64	0
2019-01-16 18:45:00	0	266.4	0	40.36	3.22	20.72	3.40667	171.733	4.58	0
2019-01-16 19:00:00	0	292.18	0	41.7133	4.01333	19.8933	3.9	200.2	4.43333	1.37733
2019-01-16 19:15:00	0	295.307	0	100.767	4.60667	69.1267	4.33333	211.133	4.11333	3.21867
2019-01-16 19:30:00	0	291.84	0	81.3733	4.82	55.18	4.35333	347.933	4.08667	3.186
2019-01-16 19:45:00	0	295.72	0	97.7667	4.23333	68.3067	3.92667	52.0667	3.96	2.726
2019-01-16 20:00:00	0	287.247	0	107.533	4.76667	79.1333	4.34	5.33333	3.71333	3.68733
2019-01-16 20:15:00	0	184.873	0	109.96	5.51333	82.06	4.8	12.8	3.60667	4.21067
2019-01-16 20:30:00	0	232.78	0	107.927	5.62	82.32	4.89333	10.8	3.6	4.77933
2019-01-16 20:45:00	0	261.9	0	105.847	5.72667	83.1867	5.01333	11.9333	3.56667	4.36867
2019-01-16 21:00:00	0.08	164.34	0	112.367	5.14	87.3667	4.60667	151.867	3.52667	2.62267
2019-01-16 21:15:00	0	216.173	0	111.86	4.71333	89.2067	4.48667	353.733	3.6	2.07133
2019-01-16 21:30:00	0	147.493	0	110.307	4.28667	84.9267	4.18	353.8	3.54	1.076
2019-01-16 21:45:00	0	203.407	0	110.02	3.86	86.5267	3.88	352	3.48667	0.603333
2019-01-16 22:00:00	0	297.513	0	109.273	4.17333	84.8733	3.84667	351.267	3.4	0.357333
2019-01-16 22:15:00	0	200.68	0.22	112.2	3.86	83.44	3.44	350.8	3.44	0
2019-01-16 22:30:00	0	293.06	0	102.13	3.34	81.17	2.93	348.1	3.48	0
2019-01-16 22:45:00	0	292.18	0.073333	108.367	2.64	85.0667	2.48667	280.6	3.5	0
2019-01-16 23:00:00	0	291.733	0	114.78	2.86	86.56	2.44	328	3.52667	0
2019-01-16 23:15:00	0	278.247	0	112.613	3.4	83.0533	3.51333	139.867	3.55333	0
2019-01-16 23:30:00	0	260.213	0.44	117.06	2.44	82.5733	2.02	118.067	3.50667	0
2019-01-16 23:45:00	0	230.113	0.073333	138.127	2.48667	103.067	2.44667	38.2	3.55333	0
2019-01-17	0.085714	151.064	0	156.071	2.27857	185.9	1.60714	185.357	3.47857	0
2019-01-17 00:15:00	0	77.1	0	27.8933	0	228.64	0.493333	252.2	3.49333	0
2019-01-17 00:30:00	0.08	77.1	0	295.94	0.24	278.093	0.566667	180.267	3.5	0
2019-01-17 00:45:00	0	77.1467	0	315.04	0.08	233.34	0.553333	83.0667	3.58667	0
2019-01-17 01:00:00	0	77.2	0	314.92	0	160.6	0.686667	80.4	3.68667	0
2019-01-17 01:15:00	0	77.2	0	314.9	0	160.6	0.54	85.6667	3.70667	0
2019-01-17 01:30:00	0	77.2	0	314.9	0	174.467	0.526667	151.267	3.65333	0
2019-01-17 01:45:00	0	77.1733	0	314.9	0	230.1	0.54	205.8	3.53333	0
2019-01-17 02:00:00	0	77.2	0	314.9	0	230.02	0.3	196.8	3.55333	0
2019-01-17 02:15:00	0.08	77.2	0.073333	314.9	0.16	230.113	0.693333	200.133	3.57333	0
2019-01-17 02:30:00	0.08	77.1133	0	314.9	0.32	230.327	0.973333	202.667	3.51333	0
2019-01-17 02:45:00	0.08	77.1867	0.293333	314.273	1.25333	248.56	1.50667	186.6	3.55333	0
2019-01-17 03:00:00	0	77.2933	0	299.787	2.42667	260.1	1.85333	187.067	3.4	0
2019-01-17 03:15:00	0.08	77.38	0	299.8	1.94667	260.113	1.68667	189.533	3.41333	0
2019-01-17 03:30:00	0.32	77.3067	0.073333	299.86	2.05333	269.273	1.83333	203.667	3.45333	0
2019-01-17 03:45:00	0.4	77.12	0	300.027	1.6	281.047	1.67333	213.267	3.48	0
2019-01-17 04:00:00	0.24	68.4133	0.146667	326.793	1.09333	288.473	1.13333	219.667	3.53333	0
2019-01-17 04:15:00	0.16	55.4	0	344.427	0.64	294.6	0.933333	233.6	3.58667	0
2019-01-17 04:30:00	0	55.4	0.073333	344.473	1.09333	294.6	1.10667	252.333	3.5	0
2019-01-17 04:45:00	0.32	55.1	0.073333	336.973	1.28	295.533	1.63333	235.867	3.46	0
2019-01-17 05:00:00	0.08	55.28	0.293333	333.227	1.68	303.3	1.85333	243.133	3.41333	0
2019-01-17 05:15:00	0	64.0467	0.073333	330.193	1.6	302.267	1.94	228.333	3.46	0
2019-01-17 05:30:00	0.16	77.1	0.293333	316.387	1.57333	289.247	1.28	205.2	3.3	0
2019-01-17 05:45:00	0.08	76.3133	0	309.22	1.89333	280.973	1.62667	220.533	3.34667	0
2019-01-17 06:00:00	0.24	77.3067	0.22	309.36	2	283.253	1.95333	223.4	3.3	0
2019-01-17 06:15:00	0.373333	55.5533	0.22	318.433	1.57333	298.24	1.67333	242.667	3.38	0
2019-01-17 06:30:00	0.24	51.7667	0.22	318.387	1.01333	299.873	1.29333	229.533	3.36	0
2019-01-17 06:45:00	0.08	59.6933	0	314.273	1.44	293.193	1.45333	212.333	3.27333	0
2019-01-17 07:00:00	0	96.2733	0.146667	295.467	2.16	271.493	1.8	191.8	3.04667	0
2019-01-17 07:15:00	0.16	102.147	0.22	291.153	1.73333	269.22	1.33333	209.333	3.13333	0
2019-01-17 07:30:00	0.08	81.06	0	309.687	2.05333	275.933	1.6	198.067	3.01333	0
2019-01-17 07:45:00	0	85.3733	0	301.187	2.37333	276.72	1.97333	192.867	2.86667	0
2019-01-17 08:00:00	0.32	99.66	0.366667	294.4	2.10667	275.2	1.52	192.133	2.76667	0
2019-01-17 08:15:00	0	101.007	0	294.4	0.693333	275.2	0.7	175.6	2.88	0
2019-01-17 08:30:00	0	101.007	0.073333	294.4	0.24	275.2	0.32	176.667	3.10667	0
2019-01-17 08:45:00	0	101	0	294.407	0	275.2	0.706667	209.4	3.02667	0
2019-01-17 09:00:00	0	101	0	294.4	0	275.2	0.686667	188.6	3.11333	0
2019-01-17 09:15:00	0	101	0	294.4	0	275.2	0.313333	159.667	3.42667	0
2019-01-17 09:30:00	0	101	0	294.427	0	275.2	0.36	165.133	3.78	0
2019-01-17 09:45:00	0.72	101.1	0	294.42	0.88	264.653	1.2	157.067	3.98	0
2019-01-17 10:00:00	0.24	96.9667	0.22	281.493	1.28	247.84	1.07333	172.933	4.08667	0
2019-01-17 10:15:00	0.32	99.5333	0.146667	279.467	0.8	254.84	0.973333	170.533	4.78667	0
2019-01-17 10:30:00	0	166.333	0.073333	239.56	0.373333	232.487	0.726667	151.467	5.72667	0
2019-01-17 10:45:00	0.32	105.64	0	281.333	0.933333	258.733	1.18667	114.933	5.54667	0
2019-01-17 11:00:00	0.16	128.847	0.073333	270.553	0.986667	202.047	1.12	81.8667	5.43333	0
2019-01-17 11:15:00	0.16	225.127	0.073333	146.76	1.22667	117.113	0.853333	197.867	5.51333	0
2019-01-17 11:30:00	0	293.867	0.073333	99.4267	2.48667	82.0533	1.40667	230.4	4.68667	0
2019-01-17 11:45:00	0.16	292.753	0	96.0667	1.94667	87.3667	1.09333	121.2	4.61333	0
2019-01-17 12:00:00	0.16	267.927	0.146667	114.14	1.57333	81.3333	0.64	142.2	4.7	0
2019-01-17 12:15:00	0.16	257.927	0.146667	125.627	1.6	98.1267	0.746667	106.467	4.7	0
2019-01-17 12:30:00	0.08	268.453	0.146667	117.227	1.68	103.407	1.2	39.9333	4.72	0
2019-01-17 12:45:00	0.08	256.407	0	95.32	0.96	86.6533	0.68	44.8667	4.76667	0
2019-01-17 13:00:00	0.16	272.613	0.073333	106.233	1.78667	87.8667	1.32	105.933	4.87333	0
2019-01-17 13:15:00	0.08	274.187	0	115.8	2.53333	93.1333	1.75333	29.6	5.20667	0
2019-01-17 13:30:00	0	265.953	0.073333	119.467	2.87333	92.7533	2.32	16.0667	5.22667	0
2019-01-17 13:45:00	0	262.227	0	124.147	3.22667	98.6867	2.4	27.8	4.97333	0
2019-01-17 14:00:00	0	260.187	0	123.547	3.16	106.687	2.83333	124.8	4.82	0
2019-01-17 14:15:00	0	257.793	0	132.127	2.76667	113.847	2.90667	144.333	4.88	0.468
2019-01-17 14:30:00	0.08	243.847	0.206667	130.593	2.87333	112.04	2.49333	195	4.89333	0.892
2019-01-17 14:45:00	0.08	237.227	0.133333	146.847	2.61333	128.133	2.77333	168.733	4.85333	0.633333
2019-01-17 15:00:00	0	240.087	0	147.18	3.4	125.58	2.09333	235.667	4.95333	0.382667
2019-01-17 15:15:00	0	226.647	0.073333	117.613	3.33333	105.547	2.37333	329.867	5.02	0.110667
2019-01-17 15:30:00	0	250.073	0	134.073	3.68667	110.613	2.92	212.333	4.76	0.119333
2019-01-17 15:45:00	0	256.707	0	129.173	3.51333	111.213	2.29333	167.133	4.67333	0.069333
2019-01-17 16:00:00	0	246.767	0	122.667	3.22	102.513	2.43333	280.933	4.61333	0
2019-01-17 16:15:00	0	242.4	0	121.367	3.04667	92.7133	2.47333	186.933	4.74	0
2019-01-17 16:30:00	0	260.067	0	125.227	2.76667	105.153	1.65333	192	4.68	0
2019-01-17 16:45:00	0.08	263.54	0.22	128.073	1.78667	109.36	1.34667	88.8	4.50667	0
2019-01-17 17:00:00	0.08	266.993	0.146667	114.253	2.33333	92.5	2.18	342.733	4.38667	0
2019-01-17 17:15:00	0	268.473	0.073333	111.667	2.76667	89.54	2.31333	307.133	4.24667	0
2019-01-17 17:30:00	0	296.433	0.22	104.187	0.48	70.76	0.706667	284.4	4.09333	0
2019-01-17 17:45:00	0	307.953	0	104.6	0.906667	56.6133	1.61333	299	4.00667	0
2019-01-17 18:00:00	0	271.22	0.413333	106.373	2.26667	86.5067	1.55333	337.667	3.89333	0
2019-01-17 18:15:00	0	273.287	0	112.753	2.48667	89.2	2.06667	331.267	3.75333	0
2019-01-17 18:30:00	0	272.127	0.073333	119.653	2.98667	97.1267	2.75333	323.067	3.64	0
2019-01-17 18:45:00	0	273.727	0	112.3	3.21333	92.6067	3.1	97.0667	3.53333	0
2019-01-17 19:00:00	0	268	0	114.993	3.34	95.2333	3.00667	144.667	3.5	0
2019-01-17 19:15:00	0	265.853	0	122.907	3.4	103.407	3.07333	29.8	3.40667	0.018
2019-01-17 19:30:00	0	283.7	0	120.553	2.87333	93.2467	2.62	172.333	3.4	0
2019-01-17 19:45:00	0	266.867	0	113.713	2.87333	86.1	2.6	238.2	3.31333	0
2019-01-17 20:00:00	0	283.187	0	108.713	2.98667	82.5533	2.97333	147.067	3.30667	0
2019-01-17 20:15:00	0	272.92	0	108.567	3.28	82.06	3.08	167.867	3.27333	0
2019-01-17 20:30:00	0	269.38	0	112.32	3.52	89.6267	2.87333	99.9333	3.2	0
2019-01-17 20:45:00	0	270.867	0	114.7	4.01333	91.5933	3.45333	9.93333	3.2	0
2019-01-17 21:00:00	0	272.52	0	114.347	3.91333	91.3267	3.21333	10.2	3.13333	0
2019-01-17 21:15:00	0	271.947	0	117.74	3.8	95.98	3.38	96.8667	3.08667	0
2019-01-17 21:30:00	0	273.453	0	119.08	3.90667	102.447	3.70667	28.0667	3	0.098
2019-01-17 21:45:00	0	264.687	0	123.687	3.91333	99.44	3.7	262	3	0.186
2019-01-17 22:00:00	0	266.987	0	123.52	4.18	101.733	3.87333	167.533	3	0.367333
2019-01-17 22:15:00	0	261.707	0	122.767	4.34	101.46	4.17333	75.2667	3	0.583333
2019-01-17 22:30:00	0	267.367	0	125.113	4.55333	104.773	4.21333	6.53333	3	0.901333
2019-01-17 22:45:00	0	258.593	0	126.3	3.96667	102.5	3.92667	4.26667	2.96	0.832
2019-01-17 23:00:00	0	266.133	0	125.96	4.39333	102.713	4.07333	3.6	2.9	0.759333
2019-01-17 23:15:00	0	269.52	0	119.847	4.18	100.307	3.78667	262.667	2.90667	0.618667
2019-01-17 23:30:00	0	271.613	0	111.967	3.96667	95.2933	3.85333	356.2	3	0.494
2019-01-17 23:45:00	0	272.247	0	104.413	3.64	87.8933	3.67333	352.667	2.92	0.23
2019-01-18	0.085714	288.636	0	102.171	3.50714	83.3214	3.51429	351.143	2.94286	0.065
2019-01-18 00:15:00	0	287.4	0	101.32	3.64	82.06	3.51333	345.067	3.02	0.096667
2019-01-18 00:30:00	0	282.253	0	97.2467	3.46	76.9667	3.34667	166.533	3.1	0.042
2019-01-18 00:45:00	0	287.36	0	93.1133	3.16	75.1133	3.25333	121.2	3.11333	0.016667
2019-01-18 01:00:00	0	275.52	0	102.967	3.4	84.56	3.39333	3.73333	3.1	0.038667
2019-01-18 01:15:00	0	289.68	0	99.4733	3.68667	80.64	3.42667	48.8	3.16	0.139333
2019-01-18 01:30:00	0	292.093	0	92.0133	3.46	67.9067	3.22667	353.333	3.25333	0.086
2019-01-18 01:45:00	0	295.02	0	87.04	3.34	61.88	2.88	346.2	3.3	0
2019-01-18 02:00:00	0	304.513	0	77.9467	2.98	58.5667	2.62667	347	3.3	0
2019-01-18 02:15:00	0	300.893	0	85.3933	2.86667	59.1867	2.97333	306.333	3.39333	0
2019-01-18 02:30:00	0	316.107	0	75.5533	2.86	54.4867	3.08667	191.533	3.36667	0.101333
2019-01-18 02:45:00	0	311.3	0	72.5733	3.56667	52.32	3.46667	260.4	3.28	0.719333
2019-01-18 03:00:00	0	308.467	0	63.6933	3.85333	50.0133	3.78	348.067	3.1	1.36
2019-01-18 03:15:00	0	307.433	0	65.7533	4.07333	51.5133	3.86667	51.2	3.22667	1.46067
2019-01-18 03:30:00	0	285.727	0	75.1533	3.96667	48.3467	4.09333	7.53333	3.19333	2.19133
2019-01-18 03:45:00	0	301.72	0	66.72	5.03333	44.5467	4.36	97.6667	3.2	3.19533
2019-01-18 04:00:00	0	316	0	67.86	5.14	47.16	4.51333	167.667	3.22	3.89933
2019-01-18 04:15:00	0	320.307	0	48.2667	4.70667	32.6533	4.58667	283.2	3.18667	4.32
2019-01-18 04:30:00	0	274.88	0	34.6667	5.19333	14.7333	4.79333	326.467	2.96	6.05333
2019-01-18 04:45:00	0	229.52	0	35.0133	5.24667	15.04	4.72	326.2	2.9	5.80467
2019-01-18 05:00:00	0	213.553	0	21.4467	6.24	6.28	5.26667	352.667	2.92	6.03
2019-01-18 05:15:00	0	166.913	0	23.1067	6.82667	3.90667	5.6	352.4	3	6.46533
2019-01-18 05:30:00	0	191.16	0	49.28	7.29333	35.4133	6.28	347.867	2.98667	8.15267
2019-01-18 05:45:00	0	127.387	0	44.42	8.01333	52.06	6.98667	347.333	2.94667	10.3193
2019-01-18 06:00:00	0	211.62	0	24.58	7.84667	28.3067	7.32667	346.867	3	11.4373
2019-01-18 06:15:00	0	182.153	0	24.34	7.9	5.96	7.82667	257.4	3.02667	12.0647
2019-01-18 06:30:00	0	215.82	0	28.98	7.74	49.7533	7.96	286.333	3.1	11.8
2019-01-18 06:45:00	0	226.88	0	31.3067	7.85333	52.5867	8.05333	308.733	3.1	12.3247
2019-01-18 07:00:00	0	238.327	0	22.5667	7.13333	98.56	8.18	353.8	3.14667	13.616
2019-01-18 07:15:00	0	173.187	0	22.6867	7.24667	51.4733	8.4	3	3.2	14.6073
2019-01-18 07:30:00	0	194.527	0	31.16	7.06667	74.1067	8.20667	50.2667	3.2	14.7047
2019-01-18 07:45:00	0	200.633	0	20.8267	7.73333	67.1067	8.54667	144.133	3.22	16.1127
2019-01-18 08:00:00	0	181.987	0	25.7067	7.73571	255.193	8.37143	230.143	3.3	15.264
2019-01-18 08:15:00	0	167.867	0	19.3533	7.96667	119.34	8.48	357.333	3.37333	17.2093
2019-01-18 08:30:00	0	168.507	0	64.5267	8.42	196.187	8.68	355.2	3.39333	20.422
2019-01-18 08:45:00	0	98.66	0	14.7	8.24667	194.527	8.34667	189.933	3.5	18.5327
2019-01-18 09:00:00	0	58.38	0	15.98	7.79333	203.053	7.78667	26.8667	3.62	15.486
2019-01-18 09:15:00	0	208.047	0	69.6533	7.36667	3.43333	6.78	51.0667	3.7	12.9867
2019-01-18 09:30:00	0	202.033	0	33.1267	6.51333	6.58667	6.68667	5.13333	3.7	12.0447
2019-01-18 09:45:00	0	223.233	0	37.9	6.58667	12.76	6.4	9.4	3.85333	8.75733
2019-01-18 10:00:00	0	313.04	0	37.0667	6.13333	16.42	5.85333	238.467	4	6.40933
2019-01-18 10:15:00	0	250.527	0	35.34	5.78667	33.1933	6.1	282.8	3.96	6.62933
2019-01-18 10:30:00	0	232.287	0	30.3933	5.67333	7.7	5.99333	353.4	3.88667	6.05933
2019-01-18 10:45:00	0	102.033	0	26.0533	5.73333	10.94	5.66	27.6667	4.07333	5.922
2019-01-18 11:00:00	0	58.6	0	22.6533	5.46667	54.3933	5.28667	212.867	4.29333	4.96067
2019-01-18 11:15:00	0	46.91	0	49.34	5.86	150.97	5.87	346.9	4.19	5.619
2019-01-18 11:30:00	0	54.6933	0	45.9867	6.13333	9.16	6.69333	343.8	4.3	6.19333
2019-01-18 11:45:00	0	184.34	0	33.32	6.28667	27.4533	6.81333	345.267	4.37333	5.60067
2019-01-18 12:00:00	0	202.393	0	48.4	5.63333	121.12	6.98667	302.6	4.56667	5.45733
2019-01-18 12:15:00	0	167.32	0	29.1133	5.86	97.4267	6.82667	214.867	4.77333	6.18467
2019-01-18 12:30:00	0	234.84	0	33.0333	5.69333	164.28	6.3	97.2	4.86	6.798
2019-01-18 12:45:00	0	298.587	0	37.6067	6.08	84.78	5.5	54.7333	5.06667	6.324
2019-01-18 13:00:00	0	210.18	0	42.5867	3.99333	86.8933	4.98	166.933	5.26667	6.01133
2019-01-18 13:15:00	0	218.94	0	43.46	4.6	23.7133	5.07333	167.333	5.48667	5.28067
2019-01-18 13:30:00	0	285.433	0	44.84	4.54	28.9533	4.85333	101.2	5.57333	4.96
2019-01-18 13:45:00	0	285.207	0	62.7733	5.3	49.24	5.56	236.133	5.7	5.10867
2019-01-18 14:00:00	0	324.413	0	50.5	4.98	30.04	5.32	327.133	5.90667	5.674
2019-01-18 14:15:00	0	245.173	0	52.5667	5.24667	23.38	5.58	257.333	5.98667	5.45267
2019-01-18 14:30:00	0	317.267	0	53.8333	5.03333	21.82	4.94667	304.2	6.02667	5.94933
2019-01-18 14:45:00	0	278.687	0	53.68	3.72	24.96	4.07333	235.333	6.15333	6.004
2019-01-18 15:00:00	0	186.907	0	57.3267	4.25	23.9571	4.11429	298.786	6.29333	4.49
2019-01-18 15:15:00	0	340.68	0	43.8133	3.94	22.5533	4.1	235.667	6.2	4.174
2019-01-18 15:30:00	0	266.58	0	50.48	5.52667	29.2467	5.1	325.2	6.21333	4.586
2019-01-18 15:45:00	0	306.767	0	65.6467	3.66667	25.3267	3.93333	258.733	6.24667	4.01667
2019-01-18 16:00:00	0	236.8	0	54.1	4.82	24.0267	4.97333	350.333	6.22667	4.23933
2019-01-18 16:15:00	0	325.467	0	49.2	4.87333	19.4267	4.85333	326.2	6.15333	3.90267
2019-01-18 16:30:00	0	260.853	0	46.86	4.00667	66.0733	4.00667	215.6	6.26	3.69133
2019-01-18 16:45:00	0	252.387	0	40.26	4.17333	60.38	4.45333	283.067	6.26	4.16667
2019-01-18 17:00:00	0	281.467	0	32.82	3.73333	13.8133	4.26667	280.2	6.24	3.704
2019-01-18 17:15:00	0.16	212.913	0	32.8467	3.66667	29.82	4.05333	325.933	6.20667	3.28933
2019-01-18 17:30:00	0	254.067	0	47.0933	3.4	238.207	4.40667	349.133	6.12667	3.684
2019-01-18 17:45:00	0	259.527	0	24.82	4.22	76.26	4.71333	329.2	6.04667	3.278
2019-01-18 18:00:00	0	260.053	0	35.98	4.5	9.21333	4.90667	119.867	5.95333	3.45667
2019-01-18 18:15:00	0	187.84	0	31.3867	4.17333	9.67333	5.12	3.06667	5.89333	4.01333
2019-01-18 18:30:00	0	277.36	0	32.79	4.9	14.21	5.7	6.6	5.78	5.022
2019-01-18 18:45:00	0	275.13	0	36.57	5.06	16.24	5.74	9.5	5.75	4.924
2019-01-18 19:00:00	0.08	287.273	0	45.8933	5.24667	25.44	5.43333	310.933	5.86	3.824
2019-01-18 19:15:00	0	319.58	0	46.8067	4.71333	26.7	5.35333	333.8	5.86667	3.86467
2019-01-18 19:30:00	0	329.02	0.073333	41.22	5.35333	25.8	5.83333	307.467	5.9	5.14133
2019-01-18 19:45:00	0	275.127	0	42.08	5.40667	23.3133	5.88	356.733	5.92667	5.37867
2019-01-18 20:00:00	0.08	314.953	0	41.1533	5.24667	22.1333	5.90667	354.933	5.96	7.266
2019-01-18 20:15:00	0	303.353	0	42.44	5.14	20.16	6.26	349.667	6.00667	9.11133
2019-01-18 20:30:00	0	324.273	0	63.18	6.52	21.5333	6.83333	351.8	6.26	10.1013
2019-01-18 20:45:00	0	322.513	0	51.56	6.35333	23.2133	6.84667	349.8	6.29333	9.82
2019-01-18 21:00:00	0	323.247	0	52.62	6.8	25.44	6.98667	349.867	6.22	8.604
2019-01-18 21:15:00	0	283.32	0	50.72	6.06667	18.1333	6.26	349.267	6.03333	8.84933
2019-01-18 21:30:00	0	327.173	0	51.2733	6.81333	20.9333	6.94	328.133	5.74	10.362
2019-01-18 21:45:00	0	312.367	0	55.8	6.34	28.2267	6.46667	332.733	5.61333	10.0133
2019-01-18 22:00:00	0	314.727	0	58.5133	6.34	30.4867	6.81333	285.6	5.38	10.4733
2019-01-18 22:15:00	0	310.26	0	63.2	6.68667	29.4467	7.41333	353.867	5.37333	14.3647
2019-01-18 22:30:00	0	300.91	0	59.48	7.05	29.42	6.91	351.8	5.39	13.89
2019-01-18 22:45:00	0	320.167	0	55.5933	5.86667	23.9467	6.4	348.4	5.30667	9.258
2019-01-18 23:00:00	0	288.86	0	44.36	6.48	16.32	6.68	344.867	5.26	9.42133
2019-01-18 23:15:00	0	289.913	0	42.2867	6.96	12.6333	7.94667	206.333	5.02667	15.506
2019-01-18 23:30:00	0	273.433	0	39.5267	6.92	13.2733	8.5	286.6	5.04	16.6907
2019-01-18 23:45:00	0	247.553	0	32.22	6.63333	54.6733	7.81333	354.933	4.88667	11.936
2019-01-19	0	286.743	0	41.65	6.11429	9.6	7.62143	356.5	4.77857	10.6586
2019-01-19 00:15:00	0	256.033	0	31.4467	7.02667	5.68	7.76667	283.667	4.73333	12.8627
2019-01-19 00:30:00	0	142.747	0	19.3333	7.16	73.7333	7.76667	333.467	4.8	12.566
2019-01-19 00:45:00	0	30.8533	0	11.5133	6.4	166.513	6.88	284.333	4.68	9.39
2019-01-19 01:00:00	0	41.4733	0	144.593	5.24667	344.367	5.97333	237.333	4.66667	8.34867
2019-01-19 01:15:00	0	32.4467	0	325.193	4.44667	331.147	4.95333	347.933	4.58	6.09733
2019-01-19 01:30:00	0	27.3733	0	213.553	5.03333	338.573	5.99333	354.867	4.78667	8.60067
2019-01-19 01:45:00	0	60.0667	0	3.07333	6.06	343.147	6.72	308.533	4.88	11.738
2019-01-19 02:00:00	0	31.92	0	7.47333	6.31333	349.467	7.14667	144.133	5	14.4867
2019-01-19 02:15:00	0	11.2933	0	8.20667	6.16667	348.013	7.18667	214.6	5.02	16.0887
2019-01-19 02:30:00	0	9.02	0	9.50667	6.75333	349.62	7.26	285.933	5.12667	17.366
2019-01-19 02:45:00	0	170.633	0	14.96	7.32	353.82	7.42667	262.6	5.08	16.6947
2019-01-19 03:00:00	0	140.367	0	21.14	7.37333	297.447	7.43333	74.3333	5.21333	15.9767
2019-01-19 03:15:00	0	216.227	0	23.7333	7.26667	169.007	7.5	7.13333	5.24	15.3447
2019-01-19 03:30:00	0	148.987	0	28.9067	7.32	52.9467	7.84	33.6667	5.16667	14.2373
2019-01-19 03:45:00	0	224.667	0	32.1533	7.63333	6.48	8.47333	2	4.92	13.874
2019-01-19 04:00:00	0	278.013	0	31.24	7.74	6.49333	8.47333	25.7333	4.92667	14.6093
2019-01-19 04:15:00	0	319.68	0	39.0533	8.02	10.54	8.96667	5.13333	4.82667	18.7847
2019-01-19 04:30:00	0	302.26	0	39.9333	8.39333	13.54	9.30667	123	4.84667	20.77
2019-01-19 04:45:00	0	256.3	0	39.5067	8.74	15.4067	9.36	357.267	4.82667	20.528
2019-01-19 05:00:00	0	268.68	0	40.9733	8.57333	14.62	9.56667	356.133	4.8	19.7847
2019-01-19 05:15:00	0	267	0	37.9	8.68	13.3467	9.63333	354.333	4.76	19.15
2019-01-19 05:30:00	0	204.14	0	38.9333	9.25333	14.2733	9.65333	354.733	4.71333	18.4153
2019-01-19 05:45:00	0	270.72	0	47.4333	8.44667	14.54	9.30667	308.933	4.78	18.372
2019-01-19 06:00:00	0	335.433	0	46.96	8.55333	19.66	8.68	144.733	4.86	18.7333
2019-01-19 06:15:00	0	269.087	0	44.9333	8.39333	17.1733	8.76	355.8	4.62	17.616
2019-01-19 06:30:00	0	286.84	0	43.78	7.85333	20.0533	8.13333	357.067	4.35333	14.0227
2019-01-19 06:45:00	0	267.933	0	64.38	7.04	15.4733	8	331.133	4.04	11.8593
2019-01-19 07:00:00	0	309.727	0	39.96	9.13333	21.74	9.6	3	3.96	13.632
2019-01-19 07:15:00	0	319.08	0	44.2667	9.21333	23.3467	9.33333	146.8	4.22	15.044
2019-01-19 07:30:00	0	267.08	0	46.3467	8.85333	21.0467	8.94	356.933	4.16667	14.8113
2019-01-19 07:45:00	0	293.793	0	37.7667	8.62667	18.5533	8.84	259.267	4.32	16.3193
2019-01-19 08:00:00	0	237.813	0	38.0067	8.79333	13.9933	9.34667	95.8667	4.08	18.1187
2019-01-19 08:15:00	0	179.48	0	38.46	9.2	15.8133	9.66667	263	4.07333	17.5713
2019-01-19 08:30:00	0	146.467	0	37.0933	8.92667	13.5933	9.18667	286.667	4.17333	17.8607
2019-01-19 08:45:00	0	102.14	0	33.2933	8.07333	12.9333	9.07333	355.4	4.52	18.4807
2019-01-19 09:00:00	0	182.347	0	32.04	8.33333	11.8333	9.09333	354.6	4.86667	17.608
2019-01-19 09:15:00	0	300.853	0	40.1733	8.07333	13.4467	9.56667	355.333	5.08667	18.816
2019-01-19 09:30:00	0	336.68	0	42.0733	9.36667	11.3867	9.30667	354.333	5.42	16.056
2019-01-19 09:45:00	0	245.56	0	34.08	7.92667	42.0067	8.43333	352.667	5.71333	12.2007
2019-01-19 10:00:00	0	181.993	0	77.48	6.30667	14.2933	7.50667	306.8	6.00667	7.80533
2019-01-19 10:15:00	0	190.247	0	27.16	6.70667	126.527	7.26667	285.267	6.24667	5.494
2019-01-19 10:30:00	0	277.113	0	31.92	6.35333	6.69333	7.32667	215	6.56667	5.76267
2019-01-19 10:45:00	0	251.587	0	32.6133	7.25333	12.38	7.06667	121.467	6.69333	6.68133
2019-01-19 11:00:00	0	287.293	0	55.36	6.25333	22.2667	7.05333	6.73333	6.80667	5.798
2019-01-19 11:15:00	0	282.713	0.266667	52.92	6.36667	27.44	5.72667	54.4	6.94	4.632
2019-01-19 11:30:00	0.72	311.08	0.653333	54.5867	5.58	36.7067	5.18	214.333	7.48	4.87267
2019-01-19 11:45:00	1.2	329.8	0.44	68.1	6.26	34.9	5.01333	303.6	7.78667	4.31933
2019-01-19 12:00:00	0.64	300.66	0.28	68.5933	6.18667	37.9	5.44	258.467	8.05333	4.51267
2019-01-19 12:15:00	0.373333	274.947	0.366667	78.1467	5.68	44.2333	5.1	255.6	8.40667	4.80867
2019-01-19 12:30:00	0.4	328.64	0.586667	59.8733	5.14667	34.96	4.74	144.8	8.46667	4.07267
2019-01-19 12:45:00	0	274.567	0.146667	52.58	5.26	51.3133	4.54667	257.267	8.66667	3.79133
2019-01-19 13:00:00	0.08	217.993	0.353333	91.0667	4.81333	81.1133	4.12667	146.2	8.96	2.80667
2019-01-19 13:15:00	0.16	246.08	0.293333	64.4133	3.94	36.7933	3.68667	214	9.09333	2.17467
2019-01-19 13:30:00	0.453333	320.5	0.353333	70.0067	3.61333	39.3933	3.34	169	9.35333	0.554
2019-01-19 13:45:00	0.32	195.567	0.146667	55.3733	3.39333	39.18	3.04667	212.2	9.22667	0.090667
2019-01-19 14:00:00	0.426667	233.793	0.693333	66.06	3.11333	43.4	2.5	167.733	9.7	0.008667
2019-01-19 14:15:00	0.48	284.107	0.366667	87.6333	3.02	62.36	2.61333	217	9.66	0.008
2019-01-19 14:30:00	0.24	163.293	0.22	95.9	3.14667	70.4667	1.88667	320.6	10.1067	0
2019-01-19 14:45:00	0.24	276.993	0.366667	74.1533	3.62	49.4533	3.15333	171.467	10.3933	0
2019-01-19 15:00:00	0.373333	217.4	0.5	93.6267	2.28667	88.46	2.24667	193	10.12	0
2019-01-19 15:15:00	0.08	334.247	0.22	56.7733	3.89333	31.7267	3.14667	170.2	10.2267	0.014667
2019-01-19 15:30:00	0.4	183.987	0.073333	95.8867	2.62	90.04	2.06	195.533	10.0667	0
2019-01-19 15:45:00	0.08	230.007	0.206667	72.1067	4.11333	42.6667	4.56667	200.533	10.82	0
2019-01-19 16:00:00	0.293333	296.073	0.146667	61.1733	3.77333	33.3667	3.24667	282.533	10.1867	0.080667
2019-01-19 16:15:00	0.16	228.02	0.893333	89.5333	2.66667	60.9733	2.83333	85.6	10.68	0.306667
2019-01-19 16:30:00	0.32	271.847	0.52	74.6133	4.55333	53.22	3.72	188.133	10.7133	1.01067
2019-01-19 16:45:00	0	263.14	0	60.66	4.25	34.07	3.9	214.7	10.26	1.921
2019-01-19 17:00:00	0	312.407	0	67.86	5.14667	40.3	4.80667	122.267	9.96	6.13533
2019-01-19 17:15:00	0	308.84	0	66.6467	5.40667	43.1867	4.81333	76.8	9.61333	6.45133
2019-01-19 17:30:00	0	298.773	0.073333	73.34	5.04	41.22	4.24667	55.8	9.25333	4.18933
2019-01-19 17:45:00	0	303.327	0	75.8067	3.96667	48.14	3.64	349.467	8.97333	4.01267
2019-01-19 18:00:00	0	310.593	0	74.6267	4.06	48.6933	3.87333	254.533	8.66667	2.906
2019-01-19 18:15:00	0	307.927	0	62.6733	3.80667	36.5933	3.53333	5.46667	8.53333	1.78333
2019-01-19 18:30:00	0	306.093	0	64.7933	3.52	43.5	3.08667	11.4667	8.43333	1.09667
2019-01-19 18:45:00	0	303.713	0	84.2067	3.23333	54.7667	2.34667	88.8667	8.38	0.104667
2019-01-19 19:00:00	0	279.567	0.133333	110.413	2.83333	83.42	2.63333	29.2	8.14	0
2019-01-19 19:15:00	0	246.94	0	133.413	2.86	115.74	2.77333	237.267	7.61333	0
2019-01-19 19:30:00	0	250.553	0	136.493	3.1	114.8	2.85333	308.267	7.74	0
2019-01-19 19:45:00	0.08	262.413	0	130.633	3.52	107.767	3.34667	329.667	7.30667	0.082
2019-01-19 20:00:00	0	271.6	0	122.967	3.58	101.213	3.45333	346.267	6.84667	0.336667
2019-01-19 20:15:00	0	258.827	0	120.407	3.85333	99.7933	3.66	346.133	6.52667	0.747333
2019-01-19 20:30:00	0	278.353	0	123.773	3.8	104.127	3.28	349.2	6.44667	0.422
2019-01-19 20:45:00	0	252.033	0	134.14	3.28	111.9	2.67333	281.667	7.24	0
2019-01-19 21:00:00	0	271.833	0	125.44	2.99333	107.307	2.24	211.733	7.15333	0
2019-01-19 21:15:00	0	261.48	0	124.693	2.37333	102.94	2.14	345.933	7.56667	0
2019-01-19 21:30:00	0	263.727	0	124.767	2.58667	99.5733	2.32	345.333	7.24	0
2019-01-19 21:45:00	0.08	265.253	0	124.727	2.05333	97.5	1.86667	349.133	7.32	0
2019-01-19 22:00:00	0.24	257.66	0.073333	124.727	1.57333	95.3333	1.76	351.2	7.72	0
2019-01-19 22:15:00	0	242	0.073333	124.753	1.68	93.28	1.68667	344.8	7.54	0
2019-01-19 22:30:00	0.32	246.353	0	124.76	1.17333	96.7733	1.28	191.133	7.78	0
2019-01-19 22:45:00	0	246.3	0	124.727	0	107.8	0.9	314	7.76	0
2019-01-19 23:00:00	0	265.64	0.293333	214.42	0.56	81.06	1.54667	302.333	7.58667	0
2019-01-19 23:15:00	0.12	331.4	0.66	79.46	2.08	59.38	2.29	312.9	7.95	0
2019-01-19 23:30:00	0	286.08	0	62.79	0	72.9	1.13	295.4	7.92	0
2019-01-19 23:45:00	0.24	90.0733	0.146667	256.687	0.56	243.853	0.826667	259.867	7.46	0
2019-01-20	0	30	0	305.2	0	312.707	0.814286	269.857	7.25714	0
2019-01-20 00:15:00	0.08	39.08	0	303.873	0	311.187	0.413333	248.467	7.54	0
2019-01-20 00:30:00	0	98.0533	0.293333	286.013	1.01333	284.393	1.15333	219.067	7.39333	0
2019-01-20 00:45:00	0	98	0.586667	286.1	0.72	276.4	1.42667	244.467	7.42667	0
2019-01-20 01:00:00	0	98	0	286.1	1.73333	315.267	2.47333	290.933	7.6	0
2019-01-20 01:15:00	0	182.013	0.073333	36.26	2.32	187.787	2.24	32.4	7.64	0
2019-01-20 01:30:00	0	153.247	0	34.2733	2.26667	88.72	2.62	76.4667	7.22667	0
2019-01-20 01:45:00	0	323.287	0	60.0467	2.42667	42.4533	2.24	31.9333	7.11333	0
2019-01-20 02:00:00	0	312.153	0	68.4	2.05333	54.2533	2.39333	29.6	7.11333	0
2019-01-20 02:15:00	0	318.1	0	69.4467	2.21333	48.14	2.79333	214.867	6.94	0
2019-01-20 02:30:00	0.08	289.453	0	91.2	3.66667	62.5067	4.12	260.933	6.5	0.381333
2019-01-20 02:45:00	0	258.113	0	111.693	4.98	74.98	4.79333	74.2	5.90667	1.88
2019-01-20 03:00:00	0	260.907	0	112.353	4.66	77.3333	4.62	168.4	5.60667	1.654
2019-01-20 03:15:00	0	263.407	0	99.9067	4.98	67.8267	5.38	351.733	5.8	2.43533
2019-01-20 03:30:00	0	300.86	0	80.6	5.56667	52.6667	5.46	275.933	6.66	4.85733
2019-01-20 03:45:00	0	308.447	0	61.84	5.79333	35.5267	5.60667	306.067	6.97333	9.706
2019-01-20 04:00:00	0	319.953	0	50.76	6.8	30.1333	6.82667	348.4	6.82667	12.3273
2019-01-20 04:15:00	0	286.36	0	52.1867	7.19333	20.6933	7.53333	236.4	6.67333	14.1293
2019-01-20 04:30:00	0	303.233	0	50.0933	7.63333	22.0067	8.46667	355.8	6.42	18.048
2019-01-20 04:45:00	0	300.487	0	45.7267	8.84667	19.2133	9.16667	189.267	6.14667	20.018
2019-01-20 05:00:00	0	227.133	0	37.8867	7.95333	11.2267	9.54667	238.533	5.81333	21.982
2019-01-20 05:15:00	0	307.993	0	40.96	8.37333	12.3667	9.63333	238.8	5.76	23.534
2019-01-20 05:30:00	0	179.6	0	35.0333	8.96667	12.1067	9.87333	285.6	5.68	25.2813
2019-01-20 05:45:00	0	246.133	0	38	9.31333	10.8267	10.5667	119.933	5.66	26.8453
2019-01-20 06:00:00	0	290.533	0	35.4933	9.69333	14.58	10.6867	167.667	5.67333	27.3067
2019-01-20 06:15:00	0	259.92	0	41.3667	9.18	17.1867	10.9867	97	5.72667	28.776
2019-01-20 06:30:00	0	282.747	0	74.8533	9.56	17.2933	11.2333	168.267	5.79333	30.68
2019-01-20 06:45:00	0	258.887	0	39.8333	9.78667	15.12	10.94	238.533	5.87333	30.0373
2019-01-20 07:00:00	0	232.267	0	41.8067	9.96667	12.78	11.1267	355.6	5.92	29.8273
2019-01-20 07:15:00	0	274.433	0	37.6133	10.3533	58.08	11.1067	308.533	5.84667	28.7493
2019-01-20 07:30:00	0	265.9	0	47.04	8.96	15.9733	10.5867	286.667	5.76667	26.5367
2019-01-20 07:45:00	0	288.387	0	49.7	9.02667	24.0467	10.0467	26.3333	5.72	26.2773
2019-01-20 08:00:00	0	326.34	0	50.78	8.96667	23.6667	9.92667	4.26667	5.69333	26.3533
2019-01-20 08:15:00	0	308.133	0	49.1133	9.91333	22.8933	9.83333	29.6	5.68667	27.1073
2019-01-20 08:30:00	0	263.3	0	57.4533	9.34	25.7667	9.98	354.933	5.66	27.5273
2019-01-20 08:45:00	0	259.167	0	50.7867	9.01333	22.4933	9.58	330.267	5.78	23.5
2019-01-20 09:00:00	0	326.087	0	54.1667	8.74667	26.78	8.77333	285.8	5.95333	21.074
2019-01-20 09:15:00	0	320.667	0	61.18	9.23333	23.44	9.01333	261.6	6.13333	22.0833
2019-01-20 09:30:00	0	302.753	0	46.0533	9.14667	23.3267	9.94	285.2	6.30667	23.2413
2019-01-20 09:45:00	0	279.413	0	51.8	10.5067	26.38	10.2333	354.933	6.49333	24.166
2019-01-20 10:00:00	0	304.853	0	54.66	11.3933	22.4333	10.38	354.867	6.57333	23.5127
2019-01-20 10:15:00	0	321.9	0	55.3067	9.79333	31.8267	9.83333	284.4	6.81333	24.2507
2019-01-20 10:30:00	0	299.927	0	58.9	10.2333	47.8067	9.67333	214.333	7.06	25.572
2019-01-20 10:45:00	0	320.72	0	57.68	10.0133	26.4133	9.23333	261.067	7.16	25.3413
2019-01-20 11:00:00	0	297.087	0	57.18	9.29333	27.0533	9.21333	261.333	7.44	25.1333
2019-01-20 11:15:00	0	268.673	0	61.1867	9.30667	25.6067	8.38	237.733	7.70667	23.8513
2019-01-20 11:30:00	0	320.46	0	56.5267	9.12667	25.78	8.52667	281.333	7.93333	26.7613
2019-01-20 11:45:00	0	302.707	0	50.98	8.41333	26.84	7.64	144.133	8.12	27.1027
2019-01-20 12:00:00	0	299.827	0	48.8533	8.46667	23.5333	7.60667	262.8	7.83333	24.024
2019-01-20 12:15:00	0	243.493	0	55.5933	8.24667	24.28	8.11333	122.467	8.05333	23.4333
2019-01-20 12:30:00	0	276.607	0	60.98	7.92	40.8933	8.06	191.6	8.43333	21.092
2019-01-20 12:45:00	0	308.34	0	64.1533	7.78667	33.7667	7.2	170.8	8.43333	17.5733
2019-01-20 13:00:00	0	283.353	0	53.86	6.91333	23.5933	6.52667	233.6	8.6	17.2027
2019-01-20 13:15:00	0	271.08	0	48.3267	7.90667	22.2467	6.44667	260.6	8.7	18.4907
2019-01-20 13:30:00	0.16	311.027	0.186667	58.3267	8.18667	36.6533	6.98	213.8	9.04667	19.918
2019-01-20 13:45:00	0	322.36	0	56.7067	9.68	28.1267	7.96667	121.933	9.07333	17.7293
2019-01-20 14:00:00	0	283.3	0	74.3533	7.64	43.1267	7.49333	99.2667	9.20667	18.9553
2019-01-20 14:15:00	0	296.26	0	55.4933	8.73333	26.3933	7.72	146.4	9.12	17.7947
2019-01-20 14:30:00	0	298.433	0	79.2667	8.2	38.6933	7.35333	215.467	9.3	15.146
2019-01-20 14:45:00	0.08	277.28	0	67.2133	7.36	34.7333	6.7	144.533	9.7	15.0047
2019-01-20 15:00:00	0	258.987	0	69.3667	6.81333	39.9067	5.84	103.2	9.5	16.1
2019-01-20 15:15:00	0	306.933	0	44.7933	7.34	26.1667	7.09333	237.8	9.18	17.4513
2019-01-20 15:30:00	0.08	307.78	0.133333	64.68	7.81333	31.3667	7.82	146.267	9.15333	18.104
2019-01-20 15:45:00	0	258.86	0	61.1467	7.80667	32.3667	7.92667	193.267	9.24667	20.4633
2019-01-20 16:00:00	0	304.2	0	51.9133	8.01333	25.7733	6.72667	190.467	9.08667	22.308
2019-01-20 16:15:00	0.08	305.087	0	75.0467	7.84667	42.1267	7.73333	216.2	9.08	21.462
2019-01-20 16:30:00	0	299.153	0	61.8133	8.06667	29.2733	7.58	168.133	8.81333	25.604
2019-01-20 16:45:00	0	308.12	0	65.3333	8.52667	37.4333	8.1	144.867	8.54	26.9207
2019-01-20 17:00:00	0	308.18	0	63.7533	9.62667	36.9667	8.58667	213.867	8.28667	27.814
2019-01-20 17:15:00	0	312.61	0	70.9	8.04	32.86	7.71	217.1	8.11	28.468
2019-01-20 17:30:00	0	245.84	0	58.9533	9.51333	28.1467	7.88667	192.4	7.74	27.802
2019-01-20 17:45:00	0	323.573	0	64.2067	9.74	39.36	9.70667	284.6	7.50667	29.5133
2019-01-20 18:00:00	0	304.993	0	48.7867	7.67333	27.8467	7.46	215.4	7.28	28.0813
2019-01-20 18:15:00	0	305.687	0	67.5133	8.96667	31.9333	8.22667	53	7.08667	26.8113
2019-01-20 18:30:00	0	311.533	0	57.7933	7.28667	37.9933	7.86	98.8	6.87333	26.6887
2019-01-20 18:45:00	0	309.107	0	73.24	9.02	41.8667	8.54667	213.933	6.68667	27.3393
2019-01-20 19:00:00	0	303.34	0	55.8333	8.62	36.36	8.78667	238.733	6.56667	28.176
2019-01-20 19:15:00	0	298.173	0	71.2067	8.57333	39.5	8.78667	214.933	6.41333	30.0587
2019-01-20 19:30:00	0	289.987	0	67.6667	9.23333	38.8667	9.13333	214.4	6.38667	32.1713
2019-01-20 19:45:00	0	310.613	0	59.5	10.38	34.78	9.40667	260.533	6.19333	33.392
2019-01-20 20:00:00	0	311.98	0	72.0333	8.74667	42.6467	8.94667	239.867	6	32.6687
2019-01-20 20:15:00	0	312.507	0	66.1467	9.08	37.64	9.18	190.533	5.81333	32.6593
2019-01-20 20:30:00	0	301.073	0	58.3733	9.97333	30.8067	8.84	143.8	5.64667	32.9433
2019-01-20 20:45:00	0	287.013	0	54.1067	9.51333	28.9467	8.84667	237.867	5.50667	33.4447
2019-01-20 21:00:00	0	314.06	0	62.97	9.46	33.17	9.63	215	5.46	33.817
2019-01-20 21:15:00	0	287.627	0	69.8933	10.52	30.9667	10.1	282.8	5.43333	33.6587
2019-01-20 21:30:00	0	320.92	0	50.6667	9.19333	32.36	9.72667	101.333	5.30667	33.264
2019-01-20 21:45:00	0	320.28	0	65.2733	9.63333	30.16	10	100.333	5.22667	33.5193
2019-01-20 22:00:00	0	315.7	0	62.02	10.56	33.4667	10.06	167.067	5.11333	33.5373
2019-01-20 22:15:00	0	273.28	0	60.52	9.72667	31.6467	10.0067	283.867	5.05333	31.9447
2019-01-20 22:30:00	0	312.687	0	60.9067	8.74	36.8867	8.6	167.933	4.94	31.5687
2019-01-20 22:45:00	0	317.513	0	62.66	8.46667	35.1333	9.36	98.1333	4.72667	31.7167
2019-01-20 23:00:00	0	284.673	0	66.2933	9.3	41.4667	9.15333	191.267	4.66	32.1113
2019-01-20 23:15:00	0	304.407	0	67.1467	9.46667	40.8	9.34667	237.2	4.51333	32.2853
2019-01-20 23:30:00	0	307.387	0	61.46	8.89333	35.3467	9.03333	212.667	4.3	29.8567
2019-01-20 23:45:00	0	306.7	0	69.5933	8.79333	35.3667	8.33333	167.133	4.14667	27.6267
2019-01-21	0	294.743	0	64.9643	8.75	37.7357	8.89286	178.786	4.05	28.5636
2019-01-21 00:15:00	0	301.327	0	68.8667	8.42	35.06	7.99333	191.133	3.82667	28.0547
2019-01-21 00:30:00	0	316.92	0	69.44	8.18	36.8333	7.79333	332.533	3.70667	26.456
2019-01-21 00:45:00	0	306.187	0	68.9667	8.42	34.5	8.83333	307.933	3.58667	29.3173
2019-01-21 01:00:00	0	308.987	0	65.4933	8.73333	33.8933	9.24	330.133	3.45333	30.094
2019-01-21 01:15:00	0	308.267	0	74.0533	8.54667	37.3667	9.00667	354.733	3.31333	28.9753
2019-01-21 01:30:00	0	295.873	0	62.3733	8.25333	28.6667	9.18667	120.4	3.1	28.222
2019-01-21 01:45:00	0	314.593	0	58.6467	9.47333	25.5533	9.31333	192.067	2.95333	28.34
2019-01-21 02:00:00	0	302.76	0	52.2733	8.18	28.98	8.48667	76	2.96667	27.3773
2019-01-21 02:15:00	0	314.733	0	44.42	7.97333	19.3667	9.66	262.267	2.82667	26.41
2019-01-21 02:30:00	0	282.007	0	46.22	8.51333	17.2867	9.58	354.667	2.85333	27.4293
2019-01-21 02:45:00	0	327.087	0	47.3867	8.74	25.2867	9.41333	166.733	2.68667	27.162
2019-01-21 03:00:00	0	297.92	0	55.42	8.40667	22.4	9.90667	238.4	2.61333	27.3853
2019-01-21 03:15:00	0	215.607	0	48.2667	9.08	20.8667	10.82	355.2	2.65333	26.006
2019-01-21 03:30:00	0	288.14	0	49.2867	9.86667	21.38	11.2467	354.867	2.64	25.774
2019-01-21 03:45:00	0	334.493	0	39.64	9.29333	13.68	10.94	235.933	2.47333	26.1587
2019-01-21 04:00:00	0	269.88	0	39.3133	9.56	8.08	10.7867	26.6	2.35333	24.534
2019-01-21 04:15:00	0	317.7	0	46.1667	9.08667	14.6867	10.8067	6.06667	2.33333	26.2453
2019-01-21 04:30:00	0	268.113	0	53.4133	10.2133	17.2733	11.5867	332.267	2.28	28.2
2019-01-21 04:45:00	0	304.773	0	43.26	11.1067	15.92	11.8867	355.267	2.35333	29.486
2019-01-21 05:00:00	0	240.56	0	41.29	10.37	14.16	11.5	353.4	2.34	27.583
2019-01-21 05:15:00	0	247.727	0	40.9267	9.84667	16.0333	11.4867	354.2	2.2	25.0573
2019-01-21 05:30:00	0	242.967	0	42.6733	10.7267	18.0067	11.4133	333.667	2.15333	25.4307
2019-01-21 05:45:00	0	298.573	0	53.38	9.74	22.94	11.2	167.867	2.12667	24.2087
2019-01-21 06:00:00	0	305.093	0	47.0333	10.2467	17.7333	10.8467	143.867	2.16667	19.044
2019-01-21 06:15:00	0	212.813	0	44.5	8.58	56.3733	9.57333	353.133	1.87333	13.6887
2019-01-21 06:30:00	0	186.027	0	29.9733	8.96667	8.57333	9.04	5.33333	1.77333	13.288
2019-01-21 06:45:00	0	137.373	0	25.8	7.64667	144.933	8.32	261.467	1.70667	15.122
2019-01-21 07:00:00	0	80.3933	0	21.06	7.8	170.427	8.10667	353.933	1.56667	16.8947
2019-01-21 07:15:00	0	213.893	0	28.2333	7.24	75.18	8.18667	96.6	1.58667	17.1013
2019-01-21 07:30:00	0	258.133	0	33.9	8.08667	28.4867	8.9	97.3333	1.49333	19.9453
2019-01-21 07:45:00	0	182.947	0	33.6667	8.9	51.2067	9.78667	25.6	1.55333	22.148
2019-01-21 08:00:00	0	142.44	0	21.9067	9.69333	137.64	10.1667	239.133	1.46667	22.048
2019-01-21 08:15:00	0	233.727	0	29.1533	8.34667	32.2667	10.0867	3.13333	1.50667	21.0307
2019-01-21 08:30:00	0	186.893	0	33.5067	8.72667	53.44	9.88	5.06667	1.6	21.1767
2019-01-21 08:45:00	0	295.2	0	29.3867	9.51333	99.72	10.1267	3.6	1.89333	21.6393
2019-01-21 09:00:00	0	263.8	0	37.6533	9.95333	8.04	10.4933	2.66667	2.32667	22.336
2019-01-21 09:15:00	0	324.593	0	41.1	8.02	52.0467	9.22667	2.8	2.65333	20.774
2019-01-21 09:30:00	0	282.287	0	38.0933	8.24667	17.0533	9.01333	147.133	2.65333	18.5507
2019-01-21 09:45:00	0	327.38	0	50.18	7.08667	21.1867	7.47333	145.067	3.06667	16.21
2019-01-21 10:00:00	0.08	277.433	0	52.8533	7.24	26.6467	6.40667	79	3.36667	15.0607
2019-01-21 10:15:00	0	313.027	0	55.9267	6.52	89.1733	5.02	193.2	3.81333	13.2453
2019-01-21 10:30:00	0.08	251.047	0	68.8067	5.68667	26.3267	4.62667	216.867	4.17333	11.2013
2019-01-21 10:45:00	0.16	219.073	0	61.1533	4.33333	35.5933	5.01333	211.533	4.76	11.0747
2019-01-21 11:00:00	0.08	294.827	0.073333	63.6533	5.27333	35.6067	4.36667	166.4	4.7	9.922
2019-01-21 11:15:00	0	317.68	0	62.9933	5.15333	69.8667	4.56667	258.933	4.7	5.928
2019-01-21 11:30:00	0	326.647	0	48.22	4.20667	72.1133	3.47333	167.867	4.95333	3.262
2019-01-21 11:45:00	0.08	242.06	0	104.3	4.5	80.82	3.96	258.867	5.74667	3.15533
2019-01-21 12:00:00	0.24	220.973	0.22	51.54	3.72	23.2733	3.77333	232.8	5.9	2.53733
2019-01-21 12:15:00	0	253.32	0.146667	51.7867	4.71333	26.3133	4.04667	212.667	6.14	1.97533
2019-01-21 12:30:00	0.16	282.2	0.266667	77.6533	4.88	49.1067	4.64667	237.867	6.62	1.618
2019-01-21 12:45:00	0.24	226.873	0	73.44	4	39.34	3.61333	189.133	6.82667	0.656
2019-01-21 13:00:00	0.133333	295.993	0.073333	53.8333	3.28	31.3533	3.31333	213.8	6.84	0.312667
2019-01-21 13:15:00	0	248.467	0	78.74	3.66667	61.7933	3.44667	168.4	7.22667	0.378
2019-01-21 13:30:00	0	266.713	0	73.0533	3.22	43.0133	2.85333	168.267	7.61333	0
2019-01-21 13:45:00	0.48	172.573	0.28	134.32	2.71333	90.5533	2.32	107.267	7.97333	0
2019-01-21 14:00:00	0.16	203.98	0.366667	93.7667	1.99333	148.88	1.68	62.9333	8.11333	0
2019-01-21 14:15:00	0.16	140.58	0.413333	66.6	1.72	86.3533	1.23333	176.533	7.84	0
2019-01-21 14:30:00	0.48	67.5	0.22	191.627	2.02667	290.133	1.60667	251.067	8.4	0
2019-01-21 14:45:00	0.48	114.327	0.293333	281.953	0.853333	257.253	0.9	243.467	8.98667	0
2019-01-21 15:00:00	0.506667	68.12	0.82	302.273	2.98667	309.773	1.48667	283.8	9.03333	0
2019-01-21 15:15:00	0.4	147.83	0.33	75.21	0.88	121.25	1.39	154.2	9.15	0
2019-01-21 15:30:00	0.64	253.127	0.72	121.493	1.54	87.3133	1.39333	137.6	9.8	0
2019-01-21 15:45:00	0.373333	180.287	0.206667	256.207	0.72	188.38	1.20667	224.2	9.56	0
2019-01-21 16:00:00	0.08	126.16	0	250.193	2.12	263.667	1.22	213.933	9.45333	0
2019-01-21 16:15:00	0.426667	174.453	0.646667	250.613	2	251.173	2.17333	234.867	9.76	0
2019-01-21 16:30:00	0.48	160.647	0.56	231.893	1.54667	193.053	1.62667	179.333	9.97333	0
2019-01-21 16:45:00	0	126.873	0	235.447	2.10667	212.033	2.31333	180.267	10	0
2019-01-21 17:00:00	0.08	109.227	0.073333	262.96	3.36	226.16	3.68	286.2	9.54	0.338
2019-01-21 17:15:00	0	114.973	0	243.633	4.00667	214.687	4.2	305	9.08	1.43067
2019-01-21 17:30:00	0	110.467	0.3	248.66	4.98	221.267	4.30667	192.4	8.56	2.98933
2019-01-21 17:45:00	0	108.807	0	253.38	4.71333	220.74	4.3	53.1333	8.05333	3.286
2019-01-21 18:00:00	0	112.207	0	256.673	4.60667	226.687	4.57333	192.267	7.29333	5.41467
2019-01-21 18:15:00	0	118.047	0	252.34	5.62667	228.353	5.23333	31.4667	6.40667	7.33
2019-01-21 18:30:00	0	111.62	0	264.82	5.67333	238.58	4.82667	219.4	5.84667	7.01
2019-01-21 18:45:00	0	110.467	0	262.067	6.06	235.813	5.10667	236.333	5.77333	7.226
2019-01-21 19:00:00	0	100.893	0	262.24	6.16	237.293	5.54	331.933	5.58667	7.662
2019-01-21 19:15:00	0	98.96	0	266.01	6.99	239.66	5.93	108	5.47	8.701
2019-01-21 19:30:00	0	99.1467	0	272.36	6.46	243.027	6.34667	74.9333	5.49333	9.67533
2019-01-21 19:45:00	0	103.427	0	271.64	7.02667	242.873	6.76	168.933	5.43333	12.4693
2019-01-21 20:00:00	0	108.633	0	266.307	7.74667	237.193	6.66	261.933	5.42	11.6767
2019-01-21 20:15:00	0	102.88	0	262.533	7.19333	234.953	6.46	306.467	5.18667	11.3073
2019-01-21 20:30:00	0	98.76	0	266.96	7.16	237.1	6.62	319.8	5.06	11.253
2019-01-21 20:45:00	0	104.18	0	270.887	7.26667	239.847	6.64	285.133	5.06	12.9467
2019-01-21 21:00:00	0	107.96	0	270.46	7.08667	241.18	6.64667	96.8667	5.29333	12.5487
2019-01-21 21:15:00	0	111.107	0	268.38	7.32	244.9	6.7	26.5333	5.52667	11.4447
2019-01-21 21:30:00	0	109.78	0	273.553	6.96667	244.547	6.66	74	5.44	11.0887
2019-01-21 21:45:00	0	110.387	0	267.147	6.91333	242.507	7.11333	4.93333	5.21333	13.2253
2019-01-21 22:00:00	0	109.433	0	271.307	7.74667	245.853	7.36667	9.86667	5.10667	14.21
2019-01-21 22:15:00	0	108.707	0	271.087	7.19333	243.133	7.22667	4.86667	5.01333	13.3933
2019-01-21 22:30:00	0	110.287	0	271.56	7.64	244.347	7.24667	4.13333	4.89333	13.838
2019-01-21 22:45:00	0	104.127	0	272.707	7.64	245.793	7.38667	121.667	4.77333	12.3687
2019-01-21 23:00:00	0	102.273	0	268.527	8.56667	242.633	7.15333	262.067	4.86	14.1627
2019-01-21 23:15:00	0	102.573	0	271.28	8.28	243.627	7.36667	49.2	4.88	14.2133
2019-01-21 23:30:00	0	107.013	0	270.16	7.85333	244.193	7.36	97.0667	4.71333	12.9273
2019-01-21 23:45:00	0	99.6467	0	270.993	7.96667	243.307	7.38667	284.467	4.59333	14.8907
2019-01-22	0	102.86	0	270.94	8.44	242.24	7.37	319.8	4.52	15.936
2019-01-22 00:15:00	0	108.76	0	265.44	8.12	241.52	6.14	144.2	4.32	11.798
2019-01-22 00:30:00	0	100.46	0	270.9	6.3	238.92	5.85	249.5	4.23	11.72
2019-01-22 00:45:00	0	110.493	0	263.313	6.17333	240.513	5.44	120.533	3.94667	12.9547
2019-01-22 01:00:00	0	113.36	0	265.64	6.40667	242.447	5.51333	167.467	3.86667	13.038
2019-01-22 01:15:00	0	109.653	0	267.373	6.16	241.22	5.5	306.8	3.92667	12.2167
2019-01-22 01:30:00	0	106.907	0	264.587	5.88667	239.66	5.3	307.533	3.84	11.68
2019-01-22 01:45:00	0	105.927	0	267.76	5.84667	244.973	4.92667	236.2	3.84	14.0433
2019-01-22 02:00:00	0	104.827	0	273.053	6.48667	242.013	5.27333	305.933	3.74667	13.538
2019-01-22 02:15:00	0	100.56	0	277.08	6.16667	245.033	5.28667	212.133	3.30667	15.022
2019-01-22 02:30:00	0	103.947	0	267.753	5.52	237.813	5.77333	349.8	3.1	16.1213
2019-01-22 02:45:00	0	108.013	0	269.707	5.68667	239.5	5.8	349.8	3.19333	15.176
2019-01-22 03:00:00	0	107.26	0	260.207	5.46667	234.807	5.92	347.867	3.18667	15.158
2019-01-22 03:15:00	0	105.44	0	265.873	5.97333	236.067	6.17333	350.467	3.13333	16.5253
2019-01-22 03:30:00	0	111.18	0	264.693	6.08	240.193	6.1	352.267	3.19333	14.512
2019-01-22 03:45:00	0	105.14	0	264.987	5.40667	233.733	5.56	350.8	3.13333	11.912
2019-01-22 04:00:00	0	104.607	0	268.407	5.40667	245.72	5.28	353.933	3.09333	9.76133
2019-01-22 04:15:00	0	108.513	0	268.12	5.19333	242.353	5.18	285	3.16	6.72267
2019-01-22 04:30:00	0	103.83	0	269.5	4.58	242.5	4.85	215.3	3.04	4.301
2019-01-22 04:45:00	0	111.7	0	274.8	3.68	237.51	3.37	348	2.92	2.114
2019-01-22 05:00:00	0	103.513	0	273.58	3.23333	243.12	3.20667	190.8	2.97333	1.24067
2019-01-22 05:15:00	0	103.14	0	275.713	3.66667	247.387	3.44667	327.733	2.78667	0.607333
2019-01-22 05:30:00	0	106	0	268.913	3.86	245.187	3.96667	348.4	2.87333	0.631333
2019-01-22 05:45:00	0	112.747	0	266.213	3.04	232.32	3.88	256.133	2.93333	0.473333
2019-01-22 06:00:00	0	112.027	0	253.187	3.34	217.033	3.55333	351.267	3.04667	0.263333
2019-01-22 06:15:00	0.08	149.56	0	235.293	2.69333	208.973	3.18	349.2	2.95333	0
2019-01-22 06:30:00	0	250.193	0	148.807	2.21333	193.013	2.88667	350.067	2.43333	0
2019-01-22 06:45:00	0	258.887	0	139.04	1.65333	163.967	2.64667	352.067	2.42	0
2019-01-22 07:00:00	0	259.627	0	129.88	1.62667	159.993	2.53333	166.333	2.45333	0
2019-01-22 07:15:00	0	265.74	0	121.22	2	131.353	2.52667	346.667	2.42667	0
2019-01-22 07:30:00	0	270.473	0	118.973	2	116.427	2.4	62.6667	2.5	0
2019-01-22 07:45:00	0	276.62	0	114.487	2.10667	118.193	2.36	49.2667	2.55333	0
2019-01-22 08:00:00	0	268.7	0	117.387	2.21333	95.86	1.85333	275.933	2.24667	0
2019-01-22 08:15:00	0	261.333	0	118.54	2.26667	104.067	2.26667	300.867	2.28667	0
2019-01-22 08:30:00	0	263.51	0	118.57	2.8	96.58	2.06	343.4	2.36	0
2019-01-22 08:45:00	0	257.607	0	122.827	2.32	92.8467	2.31333	333.267	2.83333	0
2019-01-22 09:00:00	0	266.22	0	124.927	2.8	96.8	2.67333	321.6	3.39333	0
2019-01-22 09:15:00	0	259.693	0	122.087	2.74667	99.0867	2.76667	183.333	3.68	0
2019-01-22 09:30:00	0	259.72	0	119.433	3.27333	93.1267	3.22	185.8	3.99333	0
2019-01-22 09:45:00	0	274.22	0	115.847	2.87333	96.5133	2.68	29.4	4.50667	0
2019-01-22 10:00:00	0.24	274.193	0	109.24	3.56667	90.1867	2.92	193.267	4.34667	0.012
2019-01-22 10:15:00	0	275.813	0	110.16	4.23333	97.48	3.75333	168.067	4.6	0.476
2019-01-22 10:30:00	0.08	272.027	0	110.26	4.17333	89.1333	3.58667	328.067	4.70667	0.763333
2019-01-22 10:45:00	0	282.553	0.426667	112.867	3.66667	94.9	3.42	146	4.4	0.726667
2019-01-22 11:00:00	0.16	283.933	0	109.047	3.74	86.9267	3.36	190.667	4.56667	0.522667
2019-01-22 11:15:00	0.56	277.207	0.413333	104.96	3.21333	93.5867	3.12	167.333	4.64	0.256
2019-01-22 11:30:00	0.32	264.353	0.146667	116.92	3.28667	92.5067	2.74667	124.4	4.95333	0.078
2019-01-22 11:45:00	0.08	272.827	0	94.4933	3.12667	97.9733	2.02	91.0667	5.20667	0
2019-01-22 12:00:00	0.08	273.7	0.073333	96.9333	3.00667	79.2133	2.00667	71.8	5.28	0
2019-01-22 12:15:00	0.24	269.147	0.22	104.28	3.21333	72.8933	1.75333	61.8667	5.70667	0
2019-01-22 12:30:00	0	259.887	0	99.2333	3.14667	76.34	2.06	155.8	6.4	0.103333
2019-01-22 12:45:00	0.16	265.367	0.26	93.9133	2.76667	66.0067	1.69333	220.733	6.62	0.021333
2019-01-22 13:00:00	0.16	132.92	0	158.92	2.11333	164.58	1.9	93.4	7.08667	0.306
2019-01-22 13:15:00	0.24	151.807	0.146667	217.227	2.92	200.18	3.2	106.4	7.58	0.484667
2019-01-22 13:30:00	0	150.267	0.073333	218.873	3.54	191.673	3.7	121.533	7.8	0.845333
2019-01-22 13:45:00	0.08	189.74	0.146667	183.473	3.13333	154.56	3.71333	122.867	8.08667	1.12867
2019-01-22 14:00:00	0	221.207	0.146667	171.14	3.88	131.66	3.76	211.733	8.01333	0.854667
2019-01-22 14:15:00	0.16	224.2	0.186667	149.313	3.27333	122.72	3.2	170.133	8.22667	0.529333
2019-01-22 14:30:00	0	211.193	0.48	183.367	3.66	173.627	3.50667	145.6	8.80667	0.312667
2019-01-22 14:45:00	0.08	218.953	0.146667	162.42	3.67333	148.507	3.16667	214.733	8.4	0.128667
2019-01-22 15:00:00	0.32	202	0.44	160.493	3.16667	124.287	3.26	142.333	9.12667	0.078
2019-01-22 15:15:00	0.16	203.42	0.146667	187.913	2.25333	161.153	3.26667	148	9.25333	0.04
2019-01-22 15:30:00	0.48	168.88	0.293333	196.287	2.78667	166.027	2.04667	143.8	9.21333	0
2019-01-22 15:45:00	0.16	215.267	0.073333	174.453	3.46667	152.913	2.98667	100.067	9.22	0.065333
2019-01-22 16:00:00	0.08	212.2	0.073333	178.493	2.72	129.393	2.47333	159.133	8.92	0.125333
2019-01-22 16:15:00	0.08	200.853	0.266667	177.92	2.48	134.5	3.09333	100.933	9.37333	0
2019-01-22 16:30:00	0	193.947	0.426667	174.36	2.77333	146.547	2.46667	234.2	9.52667	0
2019-01-22 16:45:00	0.16	213.773	0.146667	171.04	2.98667	153.26	3.13333	232.8	9.38	0
2019-01-22 17:00:00	0.16	196.1	0.146667	186.573	1.86667	148.813	2.00667	172.333	9.71333	0
2019-01-22 17:15:00	0	199.22	0.546667	210.98	2.60667	181.54	2.16	104.533	9.24667	0
2019-01-22 17:30:00	0.08	188.233	0.266667	188.72	1.74667	179.913	2.32667	61.1333	9.2	0
2019-01-22 17:45:00	0	255.22	0.22	149.007	1.01333	127.373	1.7	200.8	8.67333	0
2019-01-22 18:00:00	0.08	241.333	0.073333	114.253	2.44	85.9133	1.88	255.267	7.62667	0
2019-01-22 18:15:00	0.16	258.407	0	112.367	3.52	84.92	2.46667	280.4	6.44	0
2019-01-22 18:30:00	0	273.393	0.793333	107.873	2.48	86.2533	1.58667	146.733	6.11333	0
2019-01-22 18:45:00	0	275.613	0.266667	109.28	2.69333	88.44	1.93333	103.133	6.28667	0
2019-01-22 19:00:00	0.24	289.067	0.146667	103.78	2.64	85.3	1.72	303.667	6.32	0
2019-01-22 19:15:00	0.16	289.967	0	110.313	2.05333	89.5	1.74	145.533	6.48	0
2019-01-22 19:30:00	0	280.52	0.073333	110.167	2	95.6	1.88	78.5333	6.60667	0
2019-01-22 19:45:00	0.16	278.327	0	115.74	2.16	93.52	2.23333	126.8	6.45333	0
2019-01-22 20:00:00	0.08	270.147	0.073333	124.347	2.26667	104.88	2.92667	58.2667	6.48	0
2019-01-22 20:15:00	0	256.36	0	127.393	2.42667	107.013	2.42667	145.333	6.37333	0
2019-01-22 20:30:00	0	260.373	0.146667	126.993	2.21333	103.367	2.08	77.2667	6.25333	0
2019-01-22 20:45:00	0	248.033	0.146667	139.813	2.26667	112.453	1.63333	11.2	6.37333	0
2019-01-22 21:00:00	0	254.127	0	130.64	2.21333	104.413	2.05333	98.9333	5.98	0
2019-01-22 21:15:00	0	263.127	0	117.68	2.37333	98.4333	2.54	324	6.10667	0
2019-01-22 21:30:00	0	266.7	0	117.26	2.10667	95.8267	2.64667	54.5333	6.33333	0
2019-01-22 21:45:00	0.08	263.133	0	126.587	2.32	106.66	2.08667	171.6	6.3	0
2019-01-22 22:00:00	0.08	249.807	0	138.833	2.42667	113.26	1.78667	18.6	6.22667	0
2019-01-22 22:15:00	0	252.7	0	140.907	2.58667	116.84	1.67333	17.1333	6.20667	0
2019-01-22 22:30:00	0	238.293	0	143.2	2.64	123.467	1.60667	24.5333	6.20667	0
2019-01-22 22:45:00	0	235.047	0	145.9	2.05333	126.753	1.42667	26.1333	6.28667	0
2019-01-22 23:00:00	0	229.827	0	145.947	2	126.54	1.40667	30.6667	6.24667	0
2019-01-22 23:15:00	0	229.82	0	146	1.44	126.6	1.06	31.4667	6.35333	0
2019-01-22 23:30:00	0	229.7	0	146	0.4	126.6	0.873333	51.6	6.58	0
2019-01-22 23:45:00	0.08	229.547	0	146.18	1.01333	126.707	0.8	33.9333	6.48	0
2019-01-23	0.08	229.36	0.22	146.2	0	126.7	0.52	22.8667	6.48	0
2019-01-23 00:15:00	0	229.373	0	146.2	0	126.7	0.333333	189.8	6.42667	0
2019-01-23 00:30:00	0	229.4	0	146.2	0	126.7	0.386667	165.8	6.19333	0
2019-01-23 00:45:00	0	229.4	0	146.2	0	126.787	0.52	138.867	6.22667	0
2019-01-23 01:00:00	0	229.413	0	146.2	0	126.8	0.333333	144.067	5.86667	0
2019-01-23 01:15:00	0	229.4	0	146.2	0	126.8	0.553333	146.467	5.80667	0
2019-01-23 01:30:00	0	229.4	0	146.2	0	126.8	0.28	183	5.66	0
2019-01-23 01:45:00	0	229.5	0	146.18	0	126.8	0.233333	224.333	6.02	0
2019-01-23 02:00:00	0	229.5	0	146.12	0	126.8	0.246667	265.4	6.11333	0
2019-01-23 02:15:00	0	229.5	0	146.133	0	126.8	0.293333	142.2	6.15333	0
2019-01-23 02:30:00	0	229.5	0	146.113	0	126.8	0.273333	59.9333	6.05333	0
2019-01-23 02:45:00	0	229.5	0	146.187	0	126.8	0.293333	97.4667	5.92667	0
2019-01-23 03:00:00	0	229.487	0	146.2	0.16	126.8	0.646667	84.8667	5.90667	0
2019-01-23 03:15:00	0	229.4	0	146.2	0.72	126.893	0.966667	92.4667	6.00667	0
2019-01-23 03:30:00	0	229.4	0	146.2	0.96	127.1	0.666667	99.6	5.94667	0
2019-01-23 03:45:00	0	229.4	0	146.2	0.8	142.7	0.653333	105	5.95333	0
2019-01-23 04:00:00	0	229.4	0	146.2	1.2	185.607	0.773333	99.5333	5.91333	0
2019-01-23 04:15:00	0	197.787	0	146.2	1.04	185.687	0.666667	103.133	5.88667	0
2019-01-23 04:30:00	0	156.54	0	241.273	1.2	193.067	1.07333	111.933	5.86	0
2019-01-23 04:45:00	0.08	141.1	0.22	255.9	1.04	195.193	0.78	107.533	5.86667	0
2019-01-23 05:00:00	0	141.1	0.146667	255.9	0.88	195.18	0.74	101.933	5.84	0
2019-01-23 05:15:00	0.48	141.1	0.073333	255.9	1.01333	195.2	1.34667	90.2	5.82667	0
2019-01-23 05:30:00	0	141.1	0	255.9	0.96	195.253	0.693333	100.6	5.64667	0
2019-01-23 05:45:00	0	141.1	0.146667	255.9	1.01333	195.253	1.05333	91.5333	5.49333	0
2019-01-23 06:00:00	0.16	141.073	0.44	255.9	1.46667	201.347	0.953333	98.9333	5.55333	0
2019-01-23 06:15:00	0.16	141.1	0.44	255.9	1.46667	219.447	1.10667	98.4	5.43333	0
2019-01-23 06:30:00	0	141.093	0.806667	255.9	1.36	219.427	1.13333	98.9333	5.46	0
2019-01-23 06:45:00	0	141.1	0.586667	255.9	1.2	219.407	0.906667	97.1333	5.47333	0
2019-01-23 07:00:00	0	141.1	0.66	255.9	0.88	219.42	0.98	94.3333	5.67333	0
2019-01-23 07:15:00	0	141.1	0.513333	255.9	0.56	219.407	0.946667	95.2	5.66	0
2019-01-23 07:30:00	0.08	141.093	0.366667	255.9	0.56	219.447	0.693333	103.4	5.51333	0
2019-01-23 07:45:00	0	141.087	0	255.9	0.8	219.5	0.686667	106.067	5.24667	0
2019-01-23 08:00:00	0	141.087	0	255.9	0.56	219.5	0.64	107.867	5.2	0
2019-01-23 08:15:00	0	141.093	0	255.9	0.32	219.48	0.58	98.1333	5.18667	0
2019-01-23 08:30:00	0	141.1	0	255.9	0	219.4	0.966667	70.8	5.12	0
2019-01-23 08:45:00	0	141.1	0	255.9	0	219.4	0.953333	65.0667	5.28667	0
2019-01-23 09:00:00	0.16	141.173	0.293333	255.847	0	219.38	1.34667	57.9333	5.44	0
2019-01-23 09:15:00	0	141.2	0	255.807	0	219.247	1.33333	56.4667	5.68	0
2019-01-23 09:30:00	0.16	141.233	0	255.8	1.04	183.64	1.35333	45	5.62	0
2019-01-23 09:45:00	0.16	169.393	0.146667	182.38	0.96	165.427	1.42	40.3333	5.62667	0
2019-01-23 10:00:00	0	219.453	0	153.447	0.88	161.993	1.31333	56.7333	6.06	0
2019-01-23 10:15:00	0	287.74	0.293333	131.233	0.32	130.1	1.00667	41.2667	6.8	0
2019-01-23 10:30:00	0.453333	273.853	0.146667	107.373	0.693333	92.3533	0.94	29.4	7.06	0
2019-01-23 10:45:00	0.133333	245.667	0.5	108.62	1.01333	92.1933	0.906667	32.9333	7.11333	0
2019-01-23 11:00:00	0.16	285.173	0.146667	117.707	1.14667	108.787	0.793333	72.4667	6.99333	0
2019-01-23 11:15:00	0.16	281.413	0.22	81.3533	0.853333	103.967	0.686667	110.6	7.03333	0
2019-01-23 11:30:00	0	280.573	0.133333	102.933	1.62667	89.8133	0.793333	59.4	6.95333	0
2019-01-23 11:45:00	0	293.39	0.11	106.08	1.84	99.42	1.2	340.5	6.33	0
2019-01-23 12:00:00	0.08	263.04	0.293333	107.987	1.36	90.16	1.07333	131.8	6.38667	0
2019-01-23 12:15:00	0	278.74	0.073333	109.613	1.84667	108.56	1.38	272.6	6.07333	0
2019-01-23 12:30:00	0.08	274.047	0.073333	116.087	1.68	101.447	1.02	217.2	6.16667	0
2019-01-23 12:45:00	0	281.247	0.073333	113.32	2.33333	80.2467	1.26667	252.6	6.26667	0
2019-01-23 13:00:00	0.16	280.647	0.146667	106.107	2.42667	83.2133	1.83333	315	6.14667	0
2019-01-23 13:15:00	0.08	287.473	0	99.7733	2.21333	70.9667	1.37333	147.733	5.91333	0
2019-01-23 13:30:00	0.16	299.527	0.073333	101.233	2	82.1267	1.7	194.867	6.02667	0
2019-01-23 13:45:00	0.32	283.087	0.146667	113.467	1.65333	86.5267	1.35333	120.067	6.32667	0
2019-01-23 14:00:00	0	284.267	0.206667	103.2	1.73333	82.48	1.52667	173.4	6.49333	0
2019-01-23 14:15:00	0.16	288.433	0	100.033	2.16	80.6733	1.46667	277.133	6.26667	0
2019-01-23 14:30:00	0.08	300.567	0.293333	82.8467	2.02667	67.2133	0.94	193.8	6.53333	0
2019-01-23 14:45:00	0.08	294.967	0.28	107.147	2	86.88	1.24	87.3333	6.61333	0
2019-01-23 15:00:00	0.08	244.04	0.073333	126.147	2.26667	99.7667	1.57333	43	6.83333	0
2019-01-23 15:15:00	0.16	222.793	0.206667	144.233	1.73333	126.04	1.67333	44.4667	7.02	0
2019-01-23 15:30:00	0	209.9	0.2	157.56	0.96	147.47	2.02	47.6	7.04	0
2019-01-23 15:45:00	0.12	178.59	0	117.67	2.5	90.05	1.41	31.1	7.2	0
[truncated: 68,000 more rows]
