# Supplementary material
Source: PeerJ journal article supplement (doi:10.7717/peerj-cs.3610)
Supplement: Wind_farm_site_6_Nominal_capacity96MW.xlsx [file Wind_farm_site_6_Nominal_capacity96MW.xlsx]

## Sheet: 2019
Time(year-month-day h:m:s)	Wind speed at height of 10 meters (m/s)	Wind direction at height of 10 meters (˚)	Wind speed at height of 30 meters (m/s)	Wind direction at height of 30 meters (˚)	Wind speed at height of 50 meters (m/s)	Wind direction at height of 50 meters (˚)	Wind speed - at the height of wheel hub (m/s)	Wind speed - at the height of wheel hub (˚)	Air temperature (°C)	Atmosphere (hpa)	Relative humidity (%)	Power (MW)
2019-01-01	9.95	33.54	12.35	31.01	14.18	26.39	15.37	31.64	10.57	1089.58	80.05	93.186
2019-01-01 00:15:00	9.95	33.54	12.35	31.01	14.18	26.39	15.37	31.64	10.57	1089.58	80.05	93.628
2019-01-01 00:30:00	9.95	33.54	12.35	31.01	14.18	26.39	15.37	31.64	10.57	1089.58	80.05	93.53
2019-01-01 00:45:00	9.95	33.54	12.35	31.01	14.18	26.39	15.37	31.64	10.57	1089.58	80.05	87.713
2019-01-01 01:00:00	9.92	35.69	12.4	30.45	14.2	28.83	15.46	33.56	10.58	1089.58	78.75	92.794
2019-01-01 01:15:00	8.5	36.55	10.54	33.57	11.92	29.42	13.1	35.72	10.47	1088.92	78.67	92.843
2019-01-01 01:30:00	10.02	39.15	12.7	32.35	14.16	30.95	15.27	36.22	10.61	1088.92	77.85	94.181
2019-01-01 01:45:00	9.99	38.37	12.72	33.26	14.4	31.14	14.97	36.86	10.53	1088.92	77.54	91.099
2019-01-01 02:00:00	9.53	38.5	12.18	32.38	13.64	32.36	14.67	37.46	10.65	1088.92	77.21	92.478
2019-01-01 02:15:00	10.05	39.2	12.85	35.64	14.21	33.93	14.86	38.21	10.69	1088.92	76.85	92.867
2019-01-01 02:30:00	9.65	35.54	12.32	31.35	14.1	32.24	15.16	37.43	10.9	1088.92	77.04	91.206
2019-01-01 02:45:00	9.83	38.62	12.37	29.81	14.19	34.37	15.63	40.87	10.91	1088.92	76.95	93.263
2019-01-01 03:00:00	9.2	38.55	11.66	33.6	12.87	31.34	13.6	36.22	10.9	1088.92	76.51	93.976
2019-01-01 03:15:00	10.05	36.81	12.39	28.15	14.19	31.03	15.21	36.11	10.94	1088.92	75.93	93.381
2019-01-01 03:30:00	10.08	42.21	13.5	37.5	14.96	37.67	16.22	42.27	10.86	1088.92	75.78	94.224
2019-01-01 03:45:00	9.72	40.52	12.69	33.8	13.9	34.9	15.04	39.86	10.96	1088.92	75.8	92.478
2019-01-01 04:00:00	10.2	45.27	13.44	39.57	14.8	36.9	15.25	40.66	10.98	1088.92	76.2	94.751
2019-01-01 04:15:00	9.47	39.84	12.35	25.82	14.03	33.8	15.26	37.75	11.01	1089.58	76.06	92.518
2019-01-01 04:30:00	9.81	41.13	12.68	19.64	13.93	35.38	15.44	39.69	11.05	1088.92	76.26	92.95
2019-01-01 04:45:00	10.08	41.02	13.25	22.17	14.57	34.07	15.03	37.19	11.31	1088.92	75.77	92.56
2019-01-01 05:00:00	9.6	37.7	12.1	33.13	13.53	30.35	14.33	35.14	11.25	1088.92	75.97	90.507
2019-01-01 05:15:00	9.84	40.78	13.07	39.47	14.44	35.15	15.19	39.07	11.18	1088.92	75.95	87.692
2019-01-01 05:30:00	9.19	35.43	11.88	31.27	13.15	28.27	14.47	33.87	11.34	1088.92	76.24	93.69
2019-01-01 05:45:00	9.59	38.68	11.92	36.32	13.48	32.76	14.55	36.69	11.29	1088.92	76.62	93.468
2019-01-01 06:00:00	9.84	44.12	12.95	39.24	14.31	35.03	15.4	40.12	11.28	1088.92	75.92	89.105
2019-01-01 06:15:00	10.05	41.2	13.69	39.57	15.37	36.27	16.21	40.93	11.33	1088.92	75.19	91.155
2019-01-01 06:30:00	9.72	43.15	12.81	40.27	14.07	36.57	15	41.54	11.3	1089.58	75.45	88.968
2019-01-01 06:45:00	9.28	37.94	12.04	36.15	13.38	33.45	14.09	39.22	11.32	1088.92	75.77	87.9
2019-01-01 07:00:00	9.99	37.41	12.38	35.34	13.69	32.21	13.92	37.35	11.39	1089.58	75.46	90.707
2019-01-01 07:15:00	10.11	40.78	13.11	36.71	14.59	32.57	15.15	37.65	11.31	1088.92	74.86	89.694
2019-01-01 07:30:00	10.56	37.23	13.19	33.7	14.73	30.01	15.81	35.49	11.37	1089.58	75.39	91.812
2019-01-01 07:45:00	9.48	38.78	12.3	37.06	13.69	33.36	14.73	36.82	11.34	1088.92	76.24	94.644
2019-01-01 08:00:00	11.3	42.37	13.9	38.74	15.27	34.71	16.15	39.22	11.21	1088.92	77.02	94.155
2019-01-01 08:15:00	10.02	42.49	12.63	38.35	14.2	33.83	15.12	37.47	11.14	1088.92	76.31	94.528
2019-01-01 08:30:00	9.84	34.91	12.01	32.6	13.23	27.89	14.21	33.18	11.28	1088.92	76.56	93.076
2019-01-01 08:45:00	9.75	37.68	12.14	35.26	13.65	31.63	14.97	36.28	11.3	1088.92	75.79	92.789
2019-01-01 09:00:00	9.21	37.7	11.17	33.43	12.41	30.37	13.53	34.45	11.46	1089.58	76.13	92.739
2019-01-01 09:15:00	10.04	33.71	12.38	29.21	14.14	24.68	15.26	28.51	11.44	1088.92	76.02	93.538
2019-01-01 09:30:00	10.04	35.71	12.29	32.18	13.64	29.05	14.85	36.25	11.41	1088.92	76.04	92.491
2019-01-01 09:45:00	9.87	37.55	12.45	33.81	14.45	30.76	15.57	35.66	11.34	1089.58	75.77	94.72
2019-01-01 10:00:00	9.8	36.65	12.39	33.33	14.09	28.79	15.3	33.44	11.47	1089.58	76.13	93.302
2019-01-01 10:15:00	9.43	33.96	11.52	32.05	13.32	29.9	14.36	33.59	11.47	1088.92	75.87	91.348
2019-01-01 10:30:00	10	33	12.57	29.28	14.22	24.79	15.42	29.01	11.47	1088.92	75.41	88.433
2019-01-01 10:45:00	10.77	33.73	13.19	29.77	14.93	26.52	16.22	30.86	11.33	1089.58	74.14	91.437
2019-01-01 11:00:00	10.12	32.1	12.64	28.95	14.4	26.13	15.69	31.11	11.58	1089.58	73.77	88.609
2019-01-01 11:15:00	9.07	30.89	11.32	28.31	13.01	24.72	14.16	29.29	11.48	1088.92	74.65	88.971
2019-01-01 11:30:00	9.55	35.07	11.61	31.45	12.72	27.29	13.85	31.09	11.5	1088.92	74.89	89.231
2019-01-01 11:45:00	9.43	32.75	11.78	29.4	13.53	25.21	15.16	28.74	11.48	1088.92	75.25	89.346
2019-01-01 12:00:00	10.08	32.55	12.67	26.47	14.11	22.66	15.18	26.88	11.52	1088.92	75.62	89.118
2019-01-01 12:15:00	9.78	31.25	11.87	26.2	13.27	23.08	14.84	29.65	11.34	1088.92	74.84	83.496
2019-01-01 12:30:00	10.21	30.51	12.43	23.5	13.79	24.22	15	28.85	11.53	1088.92	74.14	87.425
2019-01-01 12:45:00	9.85	32.03	12.27	28.89	13.92	23.42	15.31	29.25	11.49	1088.92	73.86	89.839
2019-01-01 13:00:00	10.51	31.61	13.27	29.75	15.26	25.11	16.6	30.9	11.52	1088.92	74.07	90.439
2019-01-01 13:15:00	9.31	32.11	11.78	26.66	13.55	23.97	15.14	29.29	11.42	1088.92	75.34	92.347
2019-01-01 13:30:00	9.45	37.66	12.1	32.77	13.39	29.36	13.91	35.41	11.41	1088.92	75.57	94.187
2019-01-01 13:45:00	8.94	35.86	11.48	31.74	13.25	31.13	14.94	35.5	11.41	1088.92	75.61	90.074
2019-01-01 14:00:00	8.46	38.38	10.87	32.09	12.45	28.76	13.34	34.22	11.5	1088.92	75.54	91.931
2019-01-01 14:15:00	9.35	37.57	11.88	33.55	13.33	29.75	14.04	33.61	11.7	1088.92	74.11	93.978
2019-01-01 14:30:00	9.37	41.6	12.32	38.62	13.47	35.48	14.22	39.57	11.64	1088.92	72.98	93.961
2019-01-01 14:45:00	10.08	40.53	12.8	10.02	14.23	36.3	15.02	40.13	11.51	1088.92	74.44	93.863
2019-01-01 15:00:00	8.91	35.05	11.2	26.39	12.78	30.17	14.15	35.42	11.49	1088.92	74.75	94.728
2019-01-01 15:15:00	10.54	32.06	13.18	30.25	14.72	28.15	15.63	34.17	11.37	1088.92	73.16	94.785
2019-01-01 15:30:00	9.63	35.61	12.71	24.99	14.4	29.12	15.48	34.78	11.3	1088.92	73.78	94.973
2019-01-01 15:45:00	9.48	34.34	12.08	32.42	13.89	30.75	15.29	35.24	11.36	1089.58	74.86	95.197
2019-01-01 16:00:00	10.22	37.2	12.74	33.54	14.6	33.14	15.24	35.96	11.36	1088.92	75.24	94.953
2019-01-01 16:15:00	9.94	39.28	12.31	34.9	13.61	32.3	14.48	37.3	11.4	1089.58	75.31	95
2019-01-01 16:30:00	10.71	40.8	13.9	18.44	15.34	34.1	16.04	38.9	11.22	1088.92	75.13	93.886
2019-01-01 16:45:00	10.64	35.76	13.68	34.11	15.62	30.97	16.97	34.69	11.03	1088.92	75.31	93.602
2019-01-01 17:00:00	10.35	36.62	12.9	32.94	14.64	28.64	16.27	34.34	11.23	1088.92	76.27	94.79
2019-01-01 17:15:00	10.37	40.49	13.02	35.21	14.07	31.3	14.74	35.32	11.13	1088.92	75.71	93.905
2019-01-01 17:30:00	10.48	32.78	13.46	29.79	15.27	26.59	16.71	31.19	11.18	1088.92	76.42	94.987
2019-01-01 17:45:00	10.29	32.15	12.84	30.08	14.55	26.85	16.14	32.11	11.1	1088.92	78.18	95.678
2019-01-01 18:00:00	11.09	33.69	13.95	29.03	16.01	24.89	17.37	31.17	11.19	1088.92	79.36	95.644
2019-01-01 18:15:00	10.15	34.4	12.59	30.89	14.45	27.96	15.79	32.99	11.09	1088.92	80.33	96.452
2019-01-01 18:30:00	10.62	33.92	13.28	30.41	15.35	26.94	16.89	32.01	11.12	1089.58	80.72	95.566
2019-01-01 18:45:00	11.09	31.14	13.69	26.9	15.35	23.24	16.77	28.97	10.98	1088.92	81.48	95.673
2019-01-01 19:00:00	11.72	34.01	14.62	29.58	16.54	25.76	18.25	31.76	10.91	1088.92	82.34	95.784
2019-01-01 19:15:00	10.89	35.04	13.57	30.59	15.07	26.1	16.31	32.05	11.07	1088.92	82.75	95.598
2019-01-01 19:30:00	10.12	35.37	12.47	30.97	13.97	26.56	15.02	31.58	11.11	1089.58	82.19	95.455
2019-01-01 19:45:00	11.71	33.11	14.36	30.63	16.06	26.47	17.46	31.27	11.16	1089.58	81.25	95.888
2019-01-01 20:00:00	12.27	32.96	14.87	29.46	16.5	25.94	17.81	31.09	11.23	1089.58	81.09	95.154
2019-01-01 20:15:00	10.69	35.53	12.81	32.38	14.41	28	15.58	34.66	11.2	1088.92	80.97	92.214
2019-01-01 20:30:00	11.65	34.97	14.56	30.59	16.3	27.22	17.14	32.49	11.2	1089.58	80.29	91.919
2019-01-01 20:45:00	10.72	30.78	13.3	28.48	15.08	24.92	16.16	29.78	11.23	1088.92	79.67	93.574
2019-01-01 21:00:00	11.04	30.25	13.45	27.09	14.95	23.78	16.71	29.03	11.19	1088.92	79.34	95.086
2019-01-01 21:15:00	12.07	32.63	14.68	28.73	16.69	25.03	18.3	30.37	11.38	1088.92	79.04	94.053
2019-01-01 21:30:00	10.51	35.63	13.53	31.25	15.12	26.85	15.98	31.79	11.36	1089.58	80.24	94.293
2019-01-01 21:45:00	9.55	34.76	12.23	31.72	13.53	28.39	14.66	33.54	11.18	1089.58	80.6	94.634
2019-01-01 22:00:00	9.84	35.45	12.34	30.28	14.04	26.93	15.15	32.82	11.11	1089.58	82.19	94.12
2019-01-01 22:15:00	9.32	35.26	11.78	32.59	13.43	29.73	14.99	34.25	11.18	1088.92	83.54	95.4
2019-01-01 22:30:00	10.53	32.43	12.7	31.23	14.44	27.26	15.7	33.73	10.99	1088.92	84.74	94.459
2019-01-01 22:45:00	9.82	36.18	11.94	32.83	13.6	31.34	14.73	37.15	10.9	1088.92	85.47	94.184
2019-01-01 23:00:00	10.47	35.78	13.21	30.17	14.91	27.38	16.49	32.18	10.75	1088.92	85.9	95.021
2019-01-01 23:15:00	11.13	32.65	13.57	29.17	15.68	26.6	17.7	31.55	10.81	1089.58	85.85	93.408
2019-01-01 23:30:00	9.85	32.07	11.9	28.33	13.74	25.86	15.64	30.73	10.75	1088.92	85.51	93.884
2019-01-01 23:45:00	10.4	36.56	13.06	33.35	14.72	29.4	15.88	34.44	10.71	1088.92	85.72	94.305
2019-01-02	10.31	33.97	12.8	29.42	14.44	26.07	15.5	33.2	10.62	1089.58	85.81	94.882
2019-01-02 00:15:00	10.43	34.58	12.65	32.6	14.21	28.48	15.66	32.88	10.63	1088.92	84.64	95.487
2019-01-02 00:30:00	10.78	32.97	13.24	28.99	15.14	25.89	17.13	31.56	10.61	1088.92	83.42	94.396
2019-01-02 00:45:00	9.87	34.89	12.1	31.89	14.23	26.79	15.99	31.75	10.57	1088.92	82.87	95.429
2019-01-02 01:00:00	10.09	36.41	12.83	33.85	14.86	29.25	15.92	35.32	10.63	1088.92	83.13	94.815
2019-01-02 01:15:00	10.06	34.11	12.47	31.43	14.07	25.99	15.41	31.33	10.37	1088.92	84.26	95.203
2019-01-02 01:30:00	10.19	34.97	12.63	33.05	14.88	28.43	16.75	33.8	10.3	1088.92	84.3	95.08
2019-01-02 01:45:00	9.66	40.35	11.94	36.4	13.37	30.79	14.74	36.53	10.33	1089.58	83.93	95.646
2019-01-02 02:00:00	9.51	40.78	12.02	35.23	13.62	33.11	14.35	36.08	10.38	1088.92	84.01	95.285
2019-01-02 02:15:00	10.59	37.07	13.46	36.12	15.38	31.26	16.36	36.38	10.07	1088.92	84.11	95.476
2019-01-02 02:30:00	10.22	36.32	13.07	34.42	14.76	30.12	15.94	34.93	10.02	1088.92	83.86	95.725
2019-01-02 02:45:00	10.11	37.43	12.59	32.9	14.4	29.79	15.62	34.45	10	1089.58	84.66	94.723
2019-01-02 03:00:00	9.81	35.54	12.47	31.88	14.27	28.19	15.39	33.47	10.03	1089.58	85.08	95.26
2019-01-02 03:15:00	9.81	35.54	12.82	32.67	14.3	27.72	15.27	34.69	9.94	1088.92	85.64	94.855
2019-01-02 03:30:00	10.86	42.58	14.17	38.79	15.66	35.31	16.61	38.78	10.04	1089.58	85.51	94.145
2019-01-02 03:45:00	9.86	40.35	12.34	36.91	14.08	34.59	14.79	38.2	9.97	1088.92	85.04	92.156
2019-01-02 04:00:00	9.5	32.24	11.54	26.87	13.07	26.66	14.07	33.3	10.04	1088.92	85.35	92.497
2019-01-02 04:15:00	9.87	35.82	12.4	33.75	13.65	30.75	14.49	35.03	9.98	1088.92	85.33	94.269
2019-01-02 04:30:00	9.57	32.92	12.42	29.89	14.09	27.41	14.85	33.82	10.04	1088.92	85.28	94.649
2019-01-02 04:45:00	9.47	38.07	11.77	35.74	13.14	34.08	13.95	38.39	9.93	1089.58	85.79	93.272
2019-01-02 05:00:00	10	40.25	12.93	35.89	14.6	32.54	15.79	38.55	10.06	1088.92	85.33	93.249
2019-01-02 05:15:00	9.99	31.89	12.81	27.54	14.74	24.97	16.19	30.59	10.04	1089.58	85.04	91.788
2019-01-02 05:30:00	9.54	32.6	11.72	28.77	13.46	27.03	14.61	32.29	10.16	1089.58	84.94	94.121
2019-01-02 05:45:00	9.87	36.44	12.14	28.65	13.84	25.98	15.3	30.76	10.05	1088.92	84.91	94.45
2019-01-02 06:00:00	9.98	43.81	12.78	38.81	14.02	34.86	14.82	38.39	9.98	1088.92	85.48	92.919
2019-01-02 06:15:00	9.58	37.56	11.79	32.68	12.71	28.22	13.57	35.06	9.93	1088.92	86.47	94.918
2019-01-02 06:30:00	9.39	35.54	11.7	31.67	13.13	29.13	13.93	34.41	9.9	1088.92	86.23	94.661
2019-01-02 06:45:00	10.52	34.55	12.9	27.85	14.56	26.63	16.09	32.71	9.74	1088.92	86.05	94.218
2019-01-02 07:00:00	10.5	34.98	13.15	19.86	15.17	27.14	16.5	31.91	9.81	1088.25	86.05	92.42
2019-01-02 07:15:00	9.96	32.42	12.64	30.98	13.79	28.2	14.71	33.41	9.71	1088.92	85.05	95.333
2019-01-02 07:30:00	10.11	38.16	12.69	29.24	14.1	29	15.12	34.6	9.85	1088.92	83.35	94.961
2019-01-02 07:45:00	9.88	33.13	12.04	25.61	13.08	28.06	13.96	34.96	9.93	1089.58	81.02	94.308
2019-01-02 08:00:00	10.8	38.58	14.29	28.86	15.81	32.46	16.51	37.23	10.23	1089.58	80.18	94.759
2019-01-02 08:15:00	10.27	33.63	12.71	25.12	14.25	27.31	15.26	32.37	10.11	1089.58	79.81	94.831
2019-01-02 08:30:00	9.96	36.02	12.88	29.67	14.22	29.83	15.02	35.04	10.18	1089.58	79.66	93.749
2019-01-02 08:45:00	10.62	39.61	13.51	33.58	14.82	31.82	15.61	37.28	10.33	1089.58	79.09	94.816
2019-01-02 09:00:00	10.74	36.27	13.05	29.14	14.53	27.87	15.95	33.41	10.33	1088.92	79.88	93.097
2019-01-02 09:15:00	10.28	37.34	13.21	28.83	14.51	31.41	15.4	35.25	10.26	1088.92	79.99	92.518
2019-01-02 09:30:00	10.73	38.6	13.36	34.16	15.03	30	16.26	34.94	10.25	1089.58	79.49	94.141
2019-01-02 09:45:00	10.89	35.42	13.54	32.91	15.06	29.14	15.91	34.07	10.12	1089.58	80.61	91.907
2019-01-02 10:00:00	8.94	35.88	11.57	35.61	13.06	32.26	13.76	36.39	10.16	1089.58	81.92	93.252
2019-01-02 10:15:00	9.73	35.91	12.39	33.26	14.18	29.33	14.95	34.56	10.04	1089.58	82.15	91.45
2019-01-02 10:30:00	9.75	38.75	12.13	36.1	13.47	33.18	14.1	37.81	10	1088.92	81.92	89.023
2019-01-02 10:45:00	10.23	31.56	12.44	27.67	14.35	23.81	15.58	29.41	10.12	1089.58	81.83	86.812
2019-01-02 11:00:00	8.72	35.94	11.15	33.44	12.49	29.64	13.58	35.43	10.02	1089.58	83.57	91.82
2019-01-02 11:15:00	8.67	37.28	11.13	34.46	12.32	29.26	13.72	34.82	9.77	1089.58	85.02	88.566
2019-01-02 11:30:00	8.44	35.83	11.09	30.84	12.97	26.87	14.57	31.88	9.73	1088.92	85.74	91.453
2019-01-02 11:45:00	9.63	33.68	11.61	30.93	13.63	25.48	15.37	30.7	9.87	1088.92	85.33	87.586
2019-01-02 12:00:00	9.32	32.72	11.64	31.78	13.17	28.13	14.14	32.28	9.95	1089.58	85.14	85.76
2019-01-02 12:15:00	8.68	31.6	10.88	27.87	12.34	24.95	13.64	30.87	10.07	1088.92	84.15	86.992
2019-01-02 12:30:00	8.78	35.78	10.76	15.55	12.46	29.51	13.74	33.03	10.11	1088.92	83.02	90.875
2019-01-02 12:45:00	9.47	34.48	12.05	13.5	13.74	28.28	15.02	33.23	10.27	1088.92	82.49	87.961
2019-01-02 13:00:00	8.68	32.78	10.57	28.79	12.23	27.99	13.07	32.39	10.22	1088.92	82.64	88.671
2019-01-02 13:15:00	9.59	33.25	12.18	29.84	14.06	25.7	15.35	31.28	10.41	1088.92	82.31	84.68
2019-01-02 13:30:00	8.7	34.28	10.44	30	11.35	25.21	12.67	28.54	10.28	1089.58	81.95	78.445
2019-01-02 13:45:00	8.88	35.22	10.85	33.3	12.31	29.42	13.2	34.41	10.51	1088.92	81.5	76.809
2019-01-02 14:00:00	8.87	36.67	11.49	32.35	12.99	25.95	14.17	31.01	10.65	1088.92	81.08	73.374
2019-01-02 14:15:00	8.26	34.33	10.47	31.09	11.96	25.78	12.92	28.89	10.76	1088.92	80.75	78.903
2019-01-02 14:30:00	9.79	30.69	12.01	0.53	13.35	22.96	14.73	28.42	10.96	1089.58	80.16	81.908
2019-01-02 14:45:00	8.57	36.24	10.51	33.2	12.05	28.07	13.29	33.42	10.81	1089.58	81.07	81.433
2019-01-02 15:00:00	7.96	39.33	9.89	35.38	10.99	30.63	12.06	35.78	10.94	1088.92	81.36	82.758
2019-01-02 15:15:00	7.98	36.67	10.07	33.32	11.62	28.08	12.53	34.06	11	1089.58	81.77	82.44
2019-01-02 15:30:00	9.1	35.33	11.34	33.47	12.64	28.61	13.63	33.81	10.97	1088.92	81.11	84.626
2019-01-02 15:45:00	9.42	39.11	11.93	35.92	13.05	32.21	13.91	38.14	11	1089.58	81.18	88.954
2019-01-02 16:00:00	8.73	36.73	10.87	35.09	12.04	32.11	12.97	36.47	10.95	1089.58	80.76	85.334
2019-01-02 16:15:00	9.15	37.52	11.6	36.28	13.01	32.7	14.08	37.78	10.95	1088.92	80.25	83.37
2019-01-02 16:30:00	10.22	41.57	13.19	39.03	14.35	34.13	15.35	39.08	11.11	1088.92	80.78	74.908
2019-01-02 16:45:00	9.23	38.11	12.08	36.78	13.63	32.66	14.47	36.32	11.28	1089.58	82.06	73.971
2019-01-02 17:00:00	8.62	36.29	11.62	32.49	13.65	29.28	14.89	34.27	11.23	1088.92	80.41	63.767
2019-01-02 17:15:00	9.04	41.64	11.23	39.33	12.57	34.95	13.22	39.84	11.3	1089.58	80.57	80.351
2019-01-02 17:30:00	7.99	38.21	10.18	33.53	11.35	30.02	12.38	36.25	11.48	1088.92	80.58	89.647
2019-01-02 17:45:00	9.78	39.95	12.38	38.8	14.16	35.19	15.16	40	11.26	1088.92	80.05	85.846
2019-01-02 18:00:00	8.67	36.85	10.94	34.87	12.37	32.64	13.58	36.53	11.32	1088.92	80.18	91.081
2019-01-02 18:15:00	10.26	41.83	13.44	13.07	14.83	35.3	15.67	37.22	11.28	1088.92	80.54	89.268
2019-01-02 18:30:00	9.76	38.65	12.51	0.8	14.12	32.04	14.85	37.82	11.18	1089.58	81.09	88.19
2019-01-02 18:45:00	8.58	39.25	11.01	0.44	12.38	34.16	13.32	37.81	11.33	1089.58	81.82	91.111
2019-01-02 19:00:00	9.62	42.84	12.63	0.44	14.3	35.14	15.16	39.85	11.26	1089.58	82.23	86.946
2019-01-02 19:15:00	10.08	38.07	12.52	4.26	13.73	31.4	15.25	37.17	11.16	1088.92	82.49	84.779
2019-01-02 19:30:00	9.75	37.55	12.41	0.43	14.1	29.15	15.05	33.79	11.06	1089.58	83.12	90.657
2019-01-02 19:45:00	8.76	35.19	10.77	17.13	12	28.84	12.85	34.32	11.16	1089.58	83.66	84.169
2019-01-02 20:00:00	8.31	40.48	10.96	18.95	11.99	32.37	12.91	35.41	10.96	1089.58	83.39	86.055
2019-01-02 20:15:00	9.74	35.44	12.2	13.61	13.22	27.27	13.8	32.23	11.09	1088.92	83.37	91.617
2019-01-02 20:30:00	10.1	36.24	12.52	23.53	13.79	28.16	14.6	32.65	11.13	1088.92	83.64	91.733
2019-01-02 20:45:00	8.93	34.66	11.24	31.74	12.62	27.65	13.7	32.38	11.02	1088.92	83.92	87.9
2019-01-02 21:00:00	9.49	42.67	12.02	37.86	13.13	34.06	13.91	37.16	10.92	1089.58	84.15	88.076
2019-01-02 21:15:00	9.22	35.83	11.01	31.57	12.53	26.09	13.63	31.6	10.91	1089.58	85.09	87.576
2019-01-02 21:30:00	9.12	35.8	11.26	31.05	12.46	25.72	13.71	30.21	10.86	1088.92	86.23	89.42
2019-01-02 21:45:00	9.01	34.25	10.84	30.25	11.86	25.29	12.94	30.86	10.77	1088.92	86.87	88.118
2019-01-02 22:00:00	8.4	33.12	10.33	15.44	11.52	22.55	12.66	28.73	10.73	1088.92	87.73	79.334
2019-01-02 22:15:00	9.22	33.37	11.15	23.91	12.48	25.81	14.24	29.85	10.72	1088.92	88.05	83.82
2019-01-02 22:30:00	8.94	35.08	11.33	27.9	12.46	26.81	13.61	31.88	10.78	1088.92	88.06	83.879
2019-01-02 22:45:00	9.15	33.14	11.39	28.26	12.81	27.65	13.66	32.86	10.72	1089.58	87.87	73.887
2019-01-02 23:00:00	7.96	36.89	10.25	30.63	11.51	30.55	12.02	34.29	10.88	1088.92	87.7	74.406
2019-01-02 23:15:00	8.89	34.43	11.46	24.25	13.29	26.83	14.11	30.88	10.93	1089.58	87.18	73.476
2019-01-02 23:30:00	9.18	34.61	11.29	26.54	12.72	29.19	13.71	34.22	10.91	1088.92	86.8	72.199
2019-01-02 23:45:00	8.07	34.48	10.2	31.61	11.58	27.44	12.58	32.07	11.08	1088.92	86.78	65.753
2019-01-03	9.11	33.67	11.11	23.99	12.57	26.79	13.53	29.57	11.07	1088.92	86.43	61.078
2019-01-03 00:15:00	8.3	31.36	9.93	27.54	11.2	23.11	12.7	27.37	11.13	1088.92	86.68	53.863
2019-01-03 00:30:00	7.95	34.95	10.35	31.61	11.85	26.93	12.83	29.55	11.29	1089.58	87.35	47.377
2019-01-03 00:45:00	7.82	33.23	9.71	29.39	10.98	26.77	11.65	32.28	11.38	1089.58	87.72	46.307
2019-01-03 01:00:00	6.85	28.08	7.97	24.86	8.5	21.21	9.45	28.35	11.06	1089.58	88.75	53.88
2019-01-03 01:15:00	7.14	26.98	7.96	20.87	8.68	15.71	9.85	22.6	10.96	1088.92	90.1	53.917
2019-01-03 01:30:00	6.92	34.66	8.7	26.52	9.67	24.68	10.71	29.62	11.01	1089.58	90.93	50.017
2019-01-03 01:45:00	6.28	30.78	7.66	25.02	8.49	16.9	9.9	23.98	10.9	1089.58	91.43	53.889
2019-01-03 02:00:00	6.99	32.3	8.1	26.97	9	23.24	10.12	27.62	10.95	1089.58	91.89	57.513
2019-01-03 02:15:00	6.38	30.57	7.43	26.23	8.44	20.89	9.29	26.95	10.9	1088.92	92.2	54.798
2019-01-03 02:30:00	7.57	28.43	8.78	26.72	9.93	24.11	10.89	31.2	10.9	1089.58	92.31	58.386
2019-01-03 02:45:00	6.79	31.2	8.26	28.61	9.23	24.59	10.5	29.15	10.85	1088.92	92.26	56.267
2019-01-03 03:00:00	5.94	36.47	7.8	33.15	8.75	28.76	9.69	33.57	10.99	1089.58	92.13	60.655
2019-01-03 03:15:00	6.66	32.15	8.41	29.59	9.2	26	10.18	32.31	10.84	1089.58	91.98	63.351
2019-01-03 03:30:00	6.85	33.4	8.54	29.99	9.78	22.32	10.8	27.83	10.95	1089.58	91.68	57.615
2019-01-03 03:45:00	7	30.85	9.05	27.41	10.13	23.52	10.99	30.89	11.09	1089.58	91.52	59.79
2019-01-03 04:00:00	7.52	32.54	9.75	11.4	10.96	25.32	12.48	31.13	11.23	1089.58	91.28	65.341
2019-01-03 04:15:00	7.23	37.28	9.12	30.79	10.16	28.86	11.19	33.51	11.34	1089.58	90.8	58.415
2019-01-03 04:30:00	8.39	34.99	10.83	30.62	12.27	28.73	13.24	33.29	11.47	1088.92	90.17	56.799
2019-01-03 04:45:00	6.71	37.39	8.58	29.17	9.72	28.18	10.33	33.23	11.48	1089.58	89.91	62.309
2019-01-03 05:00:00	8.45	40.54	10.81	17.66	11.95	32.7	12.7	37.35	11.5	1088.92	89.41	55.896
2019-01-03 05:15:00	7.14	35.97	8.66	31.82	9.96	28.8	10.98	35.17	11.61	1088.92	89.52	61.91
2019-01-03 05:30:00	8.31	38.05	10.37	19.38	11.48	30.95	12.63	34.38	11.59	1088.92	89.44	58.257
2019-01-03 05:45:00	6.97	37.94	9.01	20.96	10.25	30.78	10.63	37	11.68	1089.58	89.27	64.092
2019-01-03 06:00:00	7.66	38.66	9.89	19.01	11.46	34.46	12.52	39.36	11.49	1089.58	88.56	66.308
2019-01-03 06:15:00	8.09	44.09	10.92	32.1	12.25	37.29	13.24	43.04	11.67	1088.92	87.15	76.768
2019-01-03 06:30:00	8.32	42.99	10.49	33.02	11.58	36.35	12.57	41.38	11.68	1089.58	86.72	80.073
2019-01-03 06:45:00	8.1	43.24	10.59	21.24	11.97	35.9	13.1	41.73	11.82	1088.92	86.01	81.059
2019-01-03 07:00:00	8.19	36.4	9.98	10.26	10.73	31.93	11.69	38.8	11.88	1089.58	86.01	79.152
2019-01-03 07:15:00	7.77	41.66	10.06	21.11	12.05	37.17	12.65	42.36	11.94	1088.92	85.96	79.643
2019-01-03 07:30:00	8.11	37.97	9.86	20.06	11	31.38	11.17	36.73	11.89	1088.92	86.4	81.317
2019-01-03 07:45:00	7.84	37.66	9.9	28.58	11.35	29.64	12.43	34.99	11.78	1088.92	86.61	65.645
2019-01-03 08:00:00	8.72	35.52	10.79	19.7	12.15	27.87	13.02	32.53	11.77	1088.92	86.79	61.009
2019-01-03 08:15:00	8.16	42.37	10.36	30.62	10.83	31.72	11.43	35.64	11.83	1088.92	86.68	64.439
2019-01-03 08:30:00	8.1	40.7	9.77	24.42	10.84	31.26	12.4	37.32	11.76	1089.58	86.66	68.947
2019-01-03 08:45:00	8.6	45.07	11.42	31.56	12.6	36.75	13.23	42.49	11.87	1088.92	86.53	69.348
2019-01-03 09:00:00	8.77	36.84	10.76	30.99	12.04	31.09	12.75	37.6	11.91	1088.92	86.12	77.42
2019-01-03 09:15:00	9.23	44.06	11.86	30.78	12.79	36.21	13.36	39.63	11.92	1089.58	86.11	78.829
2019-01-03 09:30:00	9.05	41.29	11.45	17.65	12.6	33.86	13.51	37.66	11.82	1089.58	85.96	76.648
2019-01-03 09:45:00	8.5	36.26	10.52	18.98	11.43	30.84	12.67	36.46	11.63	1089.58	86.13	76.958
2019-01-03 10:00:00	8.54	33.66	10.32	16.66	11.37	28.29	12.21	33.6	11.64	1088.92	86.56	74.377
2019-01-03 10:15:00	8.14	41.88	10.14	22.54	11.2	34.19	11.82	38.05	11.71	1089.58	87.07	78
2019-01-03 10:30:00	7.99	39.6	9.71	35.36	10.69	31.7	11.47	38.27	11.68	1088.92	88.03	75.205
2019-01-03 10:45:00	8.09	38.98	10.23	18.08	11.5	30.83	12.35	35.4	11.61	1089.58	88.42	73.596
2019-01-03 11:00:00	7.99	36.21	10.05	12.92	11.26	26.91	12.32	31.66	11.6	1088.92	88.64	68.529
2019-01-03 11:15:00	7.13	36.55	8.88	16.45	10	27.04	11.1	30.44	11.52	1088.92	88.99	62.643
2019-01-03 11:30:00	7.8	36.97	9.75	34.01	11.08	29.36	12.32	35.68	11.65	1089.58	89.65	62.557
2019-01-03 11:45:00	7.8	31.48	9.31	29.27	10.42	24.97	11.36	31.1	11.74	1089.58	90.3	64.351
2019-01-03 12:00:00	8.56	41.49	11.11	13.12	12.15	35.42	12.64	38.78	11.86	1088.92	90.48	57.421
2019-01-03 12:15:00	7.99	44.03	11.08	27.53	12.2	37.88	13.08	42.52	11.86	1088.92	90.56	57.801
2019-01-03 12:30:00	7.43	36.04	9.17	8.64	10.61	26.41	11.62	29.45	11.87	1088.92	90.3	58.599
2019-01-03 12:45:00	7.04	34.43	9.22	32.8	10.38	27.34	11.46	30.81	11.87	1089.58	90.24	54.547
2019-01-03 13:00:00	7.04	37.2	8.72	24.45	9.89	27.06	10.73	30.44	11.91	1089.58	90.18	54.469
2019-01-03 13:15:00	6.46	33.75	8.12	26.96	9.3	26.29	10	33.72	12.02	1088.92	90.24	53.46
2019-01-03 13:30:00	7.48	38.07	9.29	36.47	10.61	32.1	11.4	36.88	12.03	1088.92	90.15	54.538
2019-01-03 13:45:00	6.91	37.97	8.95	33.72	9.83	28.72	10.58	32.25	11.98	1088.92	90.15	55.953
2019-01-03 14:00:00	7.57	35.63	9.75	14.41	10.9	24.73	12.1	29.06	12.11	1088.92	90.41	56.975
2019-01-03 14:15:00	6.77	33.31	8.6	11.31	10.13	25.89	11.51	30.76	12.11	1088.92	90.56	61.4
2019-01-03 14:30:00	7.1	35.87	9.15	16.45	10.17	27.88	11.65	33.13	12.09	1088.92	90.35	57.1
2019-01-03 14:45:00	7.97	37.7	10.13	19.9	11.48	30.48	12.6	34.7	12.17	1088.92	90.28	68.061
2019-01-03 15:00:00	8.62	33.64	11.38	24.8	13.19	27.11	14.21	31.84	12.15	1088.92	90.19	67.959
2019-01-03 15:15:00	7.65	33.33	9.52	23.97	10.51	24.15	11.38	29.61	12.29	1088.92	89.55	65.882
2019-01-03 15:30:00	8.88	33.78	11.43	7.26	12.91	26.07	14.63	31.62	12.3	1088.92	88.73	67.061
2019-01-03 15:45:00	8.59	33.95	10.75	11.81	12.24	30.73	13.26	34.04	12.51	1089.58	88.21	71.192
2019-01-03 16:00:00	8.41	39.06	10.72	14.71	12.05	27.56	13.41	32.92	12.25	1088.92	88.26	71.044
2019-01-03 16:15:00	8.72	35.15	11.02	20.29	12.55	29.09	13.49	35.06	12.47	1088.92	88.06	71.305
2019-01-03 16:30:00	8.21	39.41	9.94	5.53	11.18	32.76	12	37.02	12.31	1088.92	88.07	71.172
2019-01-03 16:45:00	8.82	34.06	11.33	32.34	12.8	28.43	13.96	33.45	12.37	1089.58	88.18	68.388
2019-01-03 17:00:00	7.81	35.19	9.96	32.47	11.1	28.15	11.94	34.2	12.45	1089.58	88.27	72.064
2019-01-03 17:15:00	7.36	33.59	9.11	33.48	10.5	29.67	11.59	35.13	12.38	1089.58	88.46	71.804
2019-01-03 17:30:00	8.64	33.61	10.83	23.64	12.13	27.6	12.81	34.19	12.39	1088.92	88.13	79.227
2019-01-03 17:45:00	7.88	39.5	10.1	30.49	11.05	31.68	12.07	34.83	12.5	1088.92	87.63	76.32
2019-01-03 18:00:00	8.21	36.75	10.95	28.25	12.41	30.58	13.8	34.82	12.59	1088.92	86.99	76.338
2019-01-03 18:15:00	9.19	33.44	11.78	21.22	13.44	25.86	14.29	31.65	12.72	1089.58	85.53	77.123
2019-01-03 18:30:00	7.66	34.72	9.79	33.38	11.16	27.73	12.3	31.68	12.71	1089.58	85.06	76.74
2019-01-03 18:45:00	8.21	31.05	9.96	26.33	11.41	22.44	12.53	25.49	12.75	1088.25	84.14	80.967
2019-01-03 19:00:00	9.38	33.95	11.16	28.98	12.29	23.62	13.7	29.2	12.79	1088.92	83.59	78.679
2019-01-03 19:15:00	9.2	31.57	11.13	28.43	12.72	24.26	14.33	26.71	12.77	1088.25	83.89	77.092
2019-01-03 19:30:00	9.17	30.82	10.76	26.46	12.05	22.84	13.83	26.96	12.71	1088.92	84.34	83.619
2019-01-03 19:45:00	9.36	31.06	10.88	25.71	12	21.51	13.53	25.71	12.74	1088.92	84.56	85.883
2019-01-03 20:00:00	8.88	30.96	10.74	28.25	12	22.33	13.67	27.58	12.65	1088.92	85.19	86.294
2019-01-03 20:15:00	9.74	30.99	11.69	28.88	13.01	22.86	14.31	28.75	12.55	1088.92	86.65	84.887
2019-01-03 20:30:00	9.26	26.52	10.76	24.39	11.92	19.49	13.3	23.95	12.49	1089.58	88.62	82.402
2019-01-03 20:45:00	9.29	29.27	10.78	24.86	12.19	22.02	13.91	26.42	12.35	1089.58	89.57	81.788
2019-01-03 21:00:00	9.29	29.27	10.78	24.86	12.19	22.02	13.91	26.42	12.35	1089.58	89.57	77.299
2019-01-03 21:15:00	9.29	29.27	10.78	24.86	12.19	22.02	13.91	26.42	12.35	1089.58	89.57	69.868
2019-01-03 21:30:00	9.29	29.27	10.78	24.86	12.19	22.02	13.91	26.42	12.35	1089.58	89.57	69.906
2019-01-03 21:45:00	9.29	29.27	10.78	24.86	12.19	22.02	13.91	26.42	12.35	1089.58	89.57	68.395
2019-01-03 22:00:00	9.29	29.27	10.78	24.86	12.19	22.02	13.91	26.42	12.35	1089.58	89.57	71.109
2019-01-03 22:15:00	9.29	29.27	10.78	24.86	12.19	22.02	13.91	26.42	12.35	1089.58	89.57	70.17
2019-01-03 22:30:00	9.29	29.27	10.78	24.86	12.19	22.02	13.91	26.42	12.35	1089.58	89.57	65.996
2019-01-03 22:45:00	9.29	29.27	10.78	24.86	12.19	22.02	13.91	26.42	12.35	1089.58	89.57	65.554
2019-01-03 23:00:00	7.83	27.02	9.04	22.46	10.07	17.36	11.32	23.55	12.97	1088.92	85.99	61.157
2019-01-03 23:15:00	8.98	27.8	10.09	24	11.19	19.72	12.45	23.7	13.04	1088.92	85.82	58.848
2019-01-03 23:30:00	7.53	26.47	8.55	20.27	9.5	15.54	10.4	18.97	13.05	1088.92	86.47	59.68
2019-01-03 23:45:00	7.61	23.1	8.73	16.73	9.77	12.86	10.6	20.53	12.89	1088.92	87.06	61.38
2019-01-04	7.23	24.78	8.62	19.3	9.73	16.3	10.52	21.08	12.74	1088.92	88.25	60.682
2019-01-04 00:15:00	7.43	23.86	8.22	21.49	9.27	17	10.75	22.39	12.57	1088.92	89.51	58.276
2019-01-04 00:30:00	7.15	25.76	8.37	19.51	9.21	13.73	10.6	19.29	12.5	1089.58	90.35	57.076
2019-01-04 00:45:00	7.69	23.66	8.64	20.59	9.44	17.18	10.81	23.05	12.53	1088.92	91.1	53.161
2019-01-04 01:00:00	7.25	23.31	8.17	18.67	9.1	15.35	10.33	20.81	12.56	1089.58	91.58	54.454
2019-01-04 01:15:00	7.3	26.45	8.29	21.61	9.13	15.3	10.42	20.54	12.53	1088.92	91.91	53.297
2019-01-04 01:30:00	6.01	30.88	7.47	26.16	8.37	18.56	9.47	24.51	12.57	1089.58	92.09	58.235
2019-01-04 01:45:00	5.29	33.12	6.37	30.01	7.32	25.1	8.73	24.74	12.61	1088.92	92.36	58.667
2019-01-04 02:00:00	5.81	32.05	6.95	27.01	7.91	20.16	9.62	23.26	12.64	1089.58	92.62	59.499
2019-01-04 02:15:00	6.71	27.65	7.92	24.14	8.92	19.21	9.89	22.95	12.64	1088.92	92.9	57.236
2019-01-04 02:30:00	6.24	28.15	7.65	27.57	8.83	21.47	10.11	24.57	12.64	1088.92	93.24	57.723
2019-01-04 02:45:00	6.73	25.75	7.54	19.67	8.43	17.22	9.67	23.04	12.74	1088.92	93.34	64.675
2019-01-04 03:00:00	7.64	26.4	8.91	22.02	10.02	16.78	11.38	24.1	12.7	1088.92	93.49	58.969
2019-01-04 03:15:00	8.05	28.91	9.3	23.07	10.29	15.36	11.44	17.29	12.76	1088.92	93.48	64.49
2019-01-04 03:30:00	7.65	22.64	8.97	20.61	9.71	17.64	10.86	20.23	12.89	1088.92	93.32	60.445
2019-01-04 03:45:00	6.87	30.33	7.71	18.64	8.2	14.21	9.45	17.93	12.96	1088.92	92.91	58.617
2019-01-04 04:00:00	6.85	25.14	7.75	17.75	8.61	12.95	9.48	17.29	13.08	1089.58	92.24	56.507
2019-01-04 04:15:00	7	25.56	8.11	22.77	8.85	17.59	10.41	21.15	13.15	1088.25	91.27	55.044
2019-01-04 04:30:00	6.8	25.45	7.88	21.29	8.62	16.48	9.82	20.74	13.21	1088.92	90.74	47.028
2019-01-04 04:45:00	7.28	26.58	8.23	21.2	8.57	15.88	9.67	20.83	13.23	1088.92	90.22	55.679
2019-01-04 05:00:00	7.93	22.83	8.66	16.01	9.51	13.57	10.8	18.26	13.54	1088.92	88.66	59.064
2019-01-04 05:15:00	8.2	20.08	9.45	14.44	10.14	10.22	11.35	14.72	13.85	1088.25	87	59.337
2019-01-04 05:30:00	9.05	26.08	10.14	21.22	10.95	16.31	12.61	21.15	13.98	1088.92	85.66	55.263
2019-01-04 05:45:00	6.66	31.43	8.06	26.38	9.13	20.29	10.7	24.65	13.99	1088.92	85.25	50.936
2019-01-04 06:00:00	7.36	26.26	8.63	21.29	9.46	15.43	10.81	22.19	14.16	1088.25	84.57	44.443
2019-01-04 06:15:00	6.64	25.98	7.6	19.15	8.44	15.33	9.7	19.76	14.23	1088.25	83.8	41.461
2019-01-04 06:30:00	6.94	22.51	7.74	14.81	8.66	10.48	9.43	17.98	14.32	1088.92	83.05	43.186
2019-01-04 06:45:00	6.25	24.21	7.24	21.32	7.8	15.45	9.16	20.07	14.32	1088.92	83.03	41.487
2019-01-04 07:00:00	5.9	28.35	7.23	22.36	8.18	17.46	9.63	22.72	14.32	1088.92	83.11	40.051
2019-01-04 07:15:00	5.55	32.27	6.81	26.59	8.21	21.53	9.7	26.05	14.28	1088.92	83.3	37.881
2019-01-04 07:30:00	6.08	34.49	7.9	32.14	8.95	24.45	9.96	26.66	14.34	1088.92	83.5	33.77
2019-01-04 07:45:00	5.85	29.31	6.83	23.66	7.17	17.23	8.06	22.56	14.41	1088.25	84.05	33.704
2019-01-04 08:00:00	5.66	35.97	7.21	30.53	7.89	24.06	8.43	26.04	14.16	1088.92	85.86	33.568
2019-01-04 08:15:00	5.92	33.63	7.6	30.02	8.76	23.09	9.89	27.39	14.07	1088.92	87.33	33.217
2019-01-04 08:30:00	6.26	34.21	8.06	30.3	9.31	24.91	10.19	28.55	13.97	1088.92	88.33	28.345
2019-01-04 08:45:00	6.48	30.53	7.76	26.63	8.64	21.55	9.65	27.26	13.98	1088.92	88.81	31.376
2019-01-04 09:00:00	5.65	30.98	7.15	28.11	7.71	23.94	8.3	29.8	13.95	1088.92	89.11	31.612
2019-01-04 09:15:00	5.46	32.06	6.55	25.51	7.32	20.27	8.21	25.48	14.03	1088.92	89.39	30.731
2019-01-04 09:30:00	5.57	24.9	6.43	23.5	6.97	17.87	7.8	23.37	13.97	1088.92	89.49	30.303
2019-01-04 09:45:00	5.58	31.52	6.95	27.38	7.83	21.36	9.04	25.14	13.97	1088.92	89.75	30.799
2019-01-04 10:00:00	5.27	35.32	6.29	27.52	6.87	19.77	7.68	21.8	14.03	1088.92	89.95	32.833
2019-01-04 10:15:00	5.8	36.47	7.15	29.49	8	24.85	9.01	28.68	14.14	1088.92	90.18	33.772
2019-01-04 10:30:00	6.45	22.55	7.34	18.87	7.93	15.84	8.92	20.71	14.32	1088.25	89.9	26.688
2019-01-04 10:45:00	5.67	27.56	6.58	21.45	7.31	15.94	8.21	20.05	14.43	1088.92	89.47	24.948
2019-01-04 11:00:00	5.57	29.25	6.51	23.76	7.1	18.66	7.89	22	14.7	1088.25	88.61	24.958
2019-01-04 11:15:00	5.02	32.25	5.81	26.83	6.36	21.98	6.9	24.52	14.94	1088.92	87.28	19.339
2019-01-04 11:30:00	4.28	28.97	5.34	27.3	5.79	19.63	6.36	20.64	15.29	1088.25	85.99	14.683
2019-01-04 11:45:00	4.3	35.25	5.82	30.81	6.28	22	6.69	20.86	15.37	1088.25	85.4	10.952
2019-01-04 12:00:00	5.51	25.75	6.38	18.77	6.79	14.41	7.56	18	15.89	1088.92	83.08	8.921
2019-01-04 12:15:00	4.7	26.78	5.33	20.08	6.17	14	6.8	16.1	16.13	1088.25	81.79	8.456
2019-01-04 12:30:00	4.63	31.5	5.52	23.8	6.06	16.74	6.67	20.43	16.2	1088.25	81.04	7.87
2019-01-04 12:45:00	4.36	33.32	5.13	28.09	5.72	21.06	6.21	22.92	16.32	1088.25	80.97	11.769
2019-01-04 13:00:00	4.85	28.46	5.66	23.16	6.03	16.76	6.53	21.93	16.5	1088.25	80.75	10.504
2019-01-04 13:15:00	5.21	35.81	6.48	28.62	6.86	19.83	6.94	20.81	16.5	1088.25	80.65	9.945
2019-01-04 13:30:00	5	35.56	6.47	30.85	7.26	23.44	8.19	27.41	16.45	1088.25	80.88	9.226
2019-01-04 13:45:00	4.57	33.55	5.74	29.4	6.39	23.27	7.42	26.54	16.65	1088.25	80.66	5.03
2019-01-04 14:00:00	3.63	31.84	4.13	22.88	4.7	15.32	5.32	20.03	16.79	1088.25	79.93	5.385
2019-01-04 14:15:00	3.88	31.1	4.79	27.06	5.03	15.89	5.23	17.91	17.06	1088.25	79.97	4.424
2019-01-04 14:30:00	3.38	35.25	4.5	24.27	5.23	14.42	5.73	17.23	17.1	1088.25	79.52	1.163
2019-01-04 14:45:00	2.89	44.85	4.18	37.73	4.37	28.29	3.5	23.89	17.01	1088.25	80.18	1.429
2019-01-04 15:00:00	2.37	24.97	2.78	15.56	3.21	9.82	3.73	13.73	17.23	1088.25	79.8	0.996
2019-01-04 15:15:00	2.06	11.96	2.64	6.77	2.87	3.43	3.2	11.08	17.25	1088.25	79.59	1.537
2019-01-04 15:30:00	2.62	30.61	3.12	26.43	3.6	15.85	4.37	22.48	17.38	1088.25	79.7	2.098
2019-01-04 15:45:00	2.38	41.95	3.25	36.78	3.87	29.9	4.79	34.95	16.97	1088.92	80.44	1.143
2019-01-04 16:00:00	2.16	43.92	3.23	22.6	3.98	30.01	4.32	31.84	16.94	1088.25	80.89	1.622
2019-01-04 16:15:00	1.69	48.89	2.02	0.42	2.29	35.8	3.54	44.44	16.63	1088.25	82.06	1.026
2019-01-04 16:30:00	0.69	56.24	2.21	0.38	3.27	45.05	4.22	46.45	16.56	1088.25	83.05	1.51
2019-01-04 16:45:00	1.16	48.11	2.37	34.34	3.07	42.36	3.29	45.04	16.43	1088.25	83.46	2.011
2019-01-04 17:00:00	2.22	27.14	2.8	8.9	3.45	25.71	4	38.17	16.69	1088.25	82.78	0.642
2019-01-04 17:15:00	0.38	24.77	0.95	39.14	1.69	50.84	2.56	54.87	16.76	1088.25	82.39	0.493
2019-01-04 17:30:00	0.14	78.73	1.15	42.51	1.65	49.33	2.55	47.08	16.47	1088.92	82.86	-0.342
2019-01-04 17:45:00	0.1	78.75	0.62	53.56	1.72	59.17	2.77	57.92	16.57	1088.25	83	-0.617
2019-01-04 18:00:00	0	78.73	0	56.93	0.92	68.24	2.59	69.98	16.7	1088.25	82.67	-0.654
2019-01-04 18:15:00	0.22	78.76	1.36	55.35	2.06	74.25	3.11	70.15	16.54	1088.25	82.66	-0.684
2019-01-04 18:30:00	0.3	78.8	0.7	54.37	1.35	74.46	2.57	81.09	16.39	1088.25	82.85	-0.699
2019-01-04 18:45:00	0.44	163.44	1.48	107.75	1.95	103.27	2.82	96.38	16.24	1088.92	83.61	-0.824
2019-01-04 19:00:00	1.02	174.82	1.91	123.3	2.31	105.21	2.72	92.81	16.2	1088.92	84.2	-0.851
2019-01-04 19:15:00	0	190.33	0.03	132.64	1.52	110.15	2.18	94.38	16.59	1088.92	83.98	-0.743
2019-01-04 19:30:00	0	190.18	0.29	133.1	1.45	110.14	2.48	90.07	16.53	1088.92	83.56	-0.401
2019-01-04 19:45:00	1.22	176.3	2.14	131.72	2.59	117.42	3.38	87.24	16.43	1088.92	83.79	-0.559
2019-01-04 20:00:00	0.12	156.83	1.34	118.76	2.08	107.08	3.1	86.7	16.43	1088.92	84.01	-0.451
2019-01-04 20:15:00	0.12	156.84	0.66	117.26	2.1	100.38	2.92	82.98	16.5	1088.92	83.9	-0.083
2019-01-04 20:30:00	0	155.88	1.47	117.29	2.47	114.53	3.6	95.56	16.33	1088.92	83.88	0.265
2019-01-04 20:45:00	0.56	134.64	2.66	108.73	3.08	104.18	4.4	99.37	16.09	1088.25	84.9	0.788
2019-01-04 21:00:00	1.31	146.73	3.12	114.73	3.62	114.41	4.83	103.79	15.88	1088.25	85.76	1.013
2019-01-04 21:15:00	2.72	169.28	3.04	123.89	3.72	112.5	5.12	103.32	15.85	1088.25	86.87	0.775
2019-01-04 21:30:00	2.26	168.73	2.91	116.59	3.44	107.6	4.74	103.1	15.83	1088.92	87.36	-0.476
2019-01-04 21:45:00	0.13	123.4	1.86	118.97	2.77	112.01	4.24	103.65	15.71	1088.92	87.47	-0.037
2019-01-04 22:00:00	0.94	152.29	2.34	102.25	3.34	101.82	4.37	97.64	15.49	1088.25	87.81	1.11
2019-01-04 22:15:00	0.56	145.87	2.87	106.56	4.54	103.14	5.13	98.71	15.47	1088.25	88.19	0.782
2019-01-04 22:30:00	0.73	139.08	2.23	113.48	3.73	106.99	5.02	98.84	15.48	1088.25	88.55	-0.077
2019-01-04 22:45:00	0.01	139.85	1.04	105.8	2.87	99.14	4	90.99	15.59	1088.25	88.65	-0.205
2019-01-04 23:00:00	0.38	139.88	2.04	111.77	3.29	110.18	4.19	98.66	15.67	1088.25	88.64	-0.71
2019-01-04 23:15:00	0	139.9	0.19	105.29	1.69	107.58	3.06	102.73	15.52	1088.25	88.34	-0.803
2019-01-04 23:30:00	0	139.89	0	105.54	1.04	107.65	2.81	103.55	15.39	1088.92	88.32	-0.463
2019-01-04 23:45:00	0.4	139.74	1.67	99.25	2.5	96.7	3.63	102.93	15.42	1088.92	88.36	-0.536
2019-01-05	0.01	135.51	1.42	73.42	1.77	74.27	3.1	93.61	15.4	1088.25	88.24	-0.487
2019-01-05 00:15:00	0.76	113.35	2.06	76.52	2.7	88.64	3.98	103.49	15.4	1088.92	88.68	-0.359
2019-01-05 00:30:00	0.56	74.21	1.99	78.16	2.86	82.87	4.02	98.19	15.24	1088.25	89.07	-0.477
2019-01-05 00:45:00	0.58	103.48	2.51	83.01	3.15	90.64	3.81	98.52	15.31	1088.92	89.43	-0.639
2019-01-05 01:00:00	0.39	79.75	1.9	79.05	2.4	86.53	3.15	95.78	15.25	1088.92	89.69	-0.261
2019-01-05 01:15:00	0.46	49.04	2.14	71.85	2.9	81.75	3.15	89.29	15.27	1088.92	89.87	-0.119
2019-01-05 01:30:00	0.8	91.61	2.31	79.74	2.58	87.09	2.88	88.84	15.25	1088.92	90.01	0.135
2019-01-05 01:45:00	0.61	61.58	2.42	56.99	2.76	64.64	2.88	75.11	15.19	1088.92	90.17	0.61
2019-01-05 02:00:00	2.04	65.47	3.44	56.86	3.89	62.23	3.82	69.03	15.15	1088.25	90.48	0.173
2019-01-05 02:15:00	2.02	75.3	2.89	48.32	3.31	56.26	3.85	66.79	15.12	1088.92	90.94	0.735
2019-01-05 02:30:00	0.48	79.06	1.7	36.25	2.3	45.48	3.19	55.86	15.06	1088.25	91.16	1.682
2019-01-05 02:45:00	1.89	16.63	2.32	15.89	2.52	21.92	2.97	38.24	15.13	1088.92	91.43	3.358
2019-01-05 03:00:00	2.67	17.92	3.03	13.21	3.47	17.79	3.72	38.81	15.13	1088.92	91.63	2.808
2019-01-05 03:15:00	1.57	44.6	2.44	36.49	2.92	42.32	3.39	55.18	14.93	1088.25	91.65	1.988
2019-01-05 03:30:00	2.36	41.15	3.82	26.01	4.25	47.33	4.47	57.51	14.8	1088.92	91.92	1.373
2019-01-05 03:45:00	1.96	42.86	2.86	21.19	3.14	42.52	3.38	56.55	14.79	1088.25	92.28	1.735
2019-01-05 04:00:00	2.05	24.22	2.67	4.18	3.27	24.08	3.71	37.92	14.61	1088.25	92.73	4.829
2019-01-05 04:15:00	2.64	43.87	3.83	15.12	4.4	39.47	4.78	49	14.49	1088.25	93.28	2.844
2019-01-05 04:30:00	2.55	37.05	3.45	12.56	3.74	36.26	4.1	49.71	14.41	1088.92	93.68	3.099
2019-01-05 04:45:00	2.58	28.82	3.27	2.62	3.7	19.94	4.62	30.65	14.41	1088.25	94.08	2.266
2019-01-05 05:00:00	2.03	31.31	2.5	2.04	2.94	24.56	3.67	35.58	14.43	1088.25	94.28	3.116
2019-01-05 05:15:00	1.7	34.97	2.69	0.6	3.12	31.53	3.77	38.79	14.45	1088.25	94.56	3.786
2019-01-05 05:30:00	2.39	27.47	2.88	10.67	3.4	24.2	4.41	36.07	14.4	1088.92	94.75	4.146
2019-01-05 05:45:00	2.25	34.93	3.13	0.47	3.54	33.16	4.24	43.34	14.39	1088.92	94.9	4.155
2019-01-05 06:00:00	2.39	41.24	3.23	4.41	3.84	35.01	4.32	40.72	14.34	1088.25	95.01	5.195
2019-01-05 06:15:00	2.03	30.67	2.59	0.33	3.18	31.94	4.27	40.04	14.32	1088.25	95.03	5.215
2019-01-05 06:30:00	2.4	35.75	3.07	0.33	3.85	24.86	4.7	36.92	14.36	1088.92	95.05	3.724
2019-01-05 06:45:00	2.63	27.56	3.04	8.85	3.4	21.1	4.25	31.64	14.3	1088.25	95	4.304
2019-01-05 07:00:00	2.4	34.62	3.06	36.87	3.62	31.9	3.9	40.64	14.36	1088.92	94.98	5.224
2019-01-05 07:15:00	1.76	40.86	2.86	6.75	3.31	39.11	4.17	48.09	14.32	1088.92	94.81	6.837
2019-01-05 07:30:00	2.39	39.72	3.24	0.48	4.14	38.33	4.79	47.54	14.3	1088.25	94.7	9.82
2019-01-05 07:45:00	3.11	34.17	3.84	0.56	4.44	27.91	5.17	33.52	14.27	1088.92	94.45	10.681
2019-01-05 08:00:00	3.36	34.73	4.38	0.54	4.9	29.88	5.41	37.25	14.16	1088.25	94.09	9.22
2019-01-05 08:15:00	3.21	49.13	4.74	0.47	5	36.98	5.74	44.98	14.17	1088.92	93.62	10.049
2019-01-05 08:30:00	3.09	40.8	4.01	0.5	4.51	31.65	5.37	39.01	14.32	1088.92	93.25	14.111
2019-01-05 08:45:00	3.87	40.12	5.04	0.52	5.67	30.78	6.36	34.87	14.31	1088.25	92.79	15.813
2019-01-05 09:00:00	4.93	44.45	5.93	0.44	6.51	36.52	7.26	41.84	14.24	1088.92	92.28	16.83
2019-01-05 09:15:00	4.3	47.23	5.71	0.41	6.2	40.14	6.84	45.65	14.3	1088.92	91.9	17.097
2019-01-05 09:30:00	3.8	49.19	5.75	0.4	6.23	42.86	6.7	49.19	14.39	1088.25	91.77	17.078
2019-01-05 09:45:00	3.66	57.22	5.08	0.39	5.14	44.45	5.54	50.52	14.35	1088.92	91.75	19.79
2019-01-05 10:00:00	4.41	46.67	5.8	0.44	6.09	39.31	6.78	44.88	14.28	1088.92	91.88	24.016
2019-01-05 10:15:00	4.72	44.55	6.12	0.47	6.8	37.4	7.18	43.58	14.24	1088.25	92.19	25.106
2019-01-05 10:30:00	5.4	41.66	6.97	0.48	7.55	35.21	8.34	42.08	14.15	1088.92	92.48	23.389
2019-01-05 10:45:00	4.78	40.31	6.63	0.48	7.55	34.37	8.43	40.94	13.99	1088.25	92.79	25.479
2019-01-05 11:00:00	5.68	46.74	7.1	0.46	7.8	35.87	8.46	41.46	14.02	1088.92	93.21	25.943
2019-01-05 11:15:00	5.51	38.16	6.93	0.49	7.66	32.85	8.6	38.83	13.83	1088.92	93.4	23.947
2019-01-05 11:30:00	5.13	34.96	6.66	0.54	7.13	27.64	7.93	33.21	13.82	1089.58	93.55	24.894
2019-01-05 11:45:00	5.16	35.44	6.23	0.55	6.64	25.12	7.15	30.3	13.81	1088.92	93.72	26.032
2019-01-05 12:00:00	4.89	38.41	6.27	0.52	6.79	27.4	7.69	31.4	13.72	1088.92	93.99	22.744
2019-01-05 12:15:00	4.9	35.74	6.41	0.53	7.2	26.14	7.92	30.25	13.68	1088.92	94.08	22.687
2019-01-05 12:30:00	5.33	32.51	6.53	0.58	7.2	21.18	8.32	28.09	13.6	1088.92	94.17	23.022
2019-01-05 12:45:00	5.35	31.74	6.36	0.59	7.11	22.87	8.33	27.26	13.57	1088.25	94.43	20.948
2019-01-05 13:00:00	5.28	33.59	6.5	0.54	7.35	25.13	8.44	29.1	13.51	1088.25	94.48	20.135
2019-01-05 13:15:00	5.59	27.01	6.47	19.87	7.1	15.74	7.71	22.46	13.59	1088.92	94.55	18.768
2019-01-05 13:30:00	5.39	25.7	6.11	23.08	6.43	20.01	7.81	24.27	13.62	1088.92	94.62	18.383
2019-01-05 13:45:00	5.04	30.61	6.4	25.09	6.74	18.53	7.73	24.5	13.65	1088.25	94.68	17.653
2019-01-05 14:00:00	5.05	30.16	6.22	20.1	6.93	22.99	8.09	28.85	13.64	1088.92	94.71	18.159
2019-01-05 14:15:00	4.96	30.47	6.4	27.48	7.1	23.05	8.27	30.69	13.76	1088.92	94.75	17.784
2019-01-05 14:30:00	4.98	28.98	5.73	26.64	6.37	24.79	7.59	30.95	13.75	1088.25	94.8	18.49
2019-01-05 14:45:00	4.2	33.12	5.12	30.91	5.75	28.08	7.02	34.68	13.79	1088.92	94.81	22.021
2019-01-05 15:00:00	4.64	41.52	5.8	37.99	6.51	32.57	7.74	36.25	13.72	1088.92	94.77	20.889
2019-01-05 15:15:00	4.99	41.49	6.22	39.6	7.04	37.04	7.72	40.16	13.68	1088.92	94.78	24.222
2019-01-05 15:30:00	5.14	39.32	6.49	0.47	7.42	33.6	8.13	39.9	13.58	1088.92	94.83	29.192
2019-01-05 15:45:00	4.79	40.82	6.16	35.77	6.87	31.21	7.97	35.72	13.58	1088.92	94.79	30.92
2019-01-05 16:00:00	4.91	38.52	6.52	36.38	7.53	33.43	8.49	40.13	13.51	1088.25	94.83	31.053
2019-01-05 16:15:00	5.02	39.11	7.07	38.87	8.08	34.61	8.58	42.24	13.48	1088.25	94.81	28.172
2019-01-05 16:30:00	4.75	35.78	5.85	33.72	6.62	29.29	7.68	35.08	13.43	1088.25	94.73	28.994
2019-01-05 16:45:00	5.18	37.59	6.7	29.92	7.33	29.72	8.09	36.25	13.42	1088.25	94.75	30.632
2019-01-05 17:00:00	4.93	37.5	6.43	0.48	7.24	31.83	7.9	39.6	13.38	1088.25	94.64	30.235
2019-01-05 17:15:00	5.61	41.68	7.06	38.73	7.66	34.83	8.36	39.98	13.34	1088.25	94.55	31.694
2019-01-05 17:30:00	5.18	39.32	6.76	37.83	7.45	34.56	8.58	37.97	13.34	1088.25	94.54	34.022
2019-01-05 17:45:00	5.18	39.32	6.76	37.83	7.45	34.56	8.58	37.97	13.34	1088.25	94.54	35.63
2019-01-05 18:00:00	5.18	39.32	6.76	37.83	7.45	34.56	8.58	37.97	13.34	1088.25	94.54	36.282
2019-01-05 18:15:00	5.18	39.32	6.76	37.83	7.45	34.56	8.58	37.97	13.34	1088.25	94.54	40.047
2019-01-05 18:30:00	5.46	38.39	7.07	34.62	7.9	28.91	8.27	34.55	13.2	1088.25	94.42	37.934
2019-01-05 18:45:00	5.56	35.83	6.79	29.2	7.76	24.91	8.74	31.53	13.13	1088.25	94.41	39.189
2019-01-05 19:00:00	5.46	36.65	6.88	31.55	8.07	26.35	9.45	31.26	13.06	1088.25	94.37	38.246
2019-01-05 19:15:00	5.49	38.93	7.35	33.98	8.46	27.77	9.29	32.13	13.04	1088.92	94.31	38.333
2019-01-05 19:30:00	6.12	34.33	7.64	31.36	8.59	27.91	9.65	34.78	13.02	1088.25	94.3	42.747
2019-01-05 19:45:00	6.18	42.35	7.65	37.56	8.36	31.52	8.9	36.61	13	1088.92	94.29	43.849
2019-01-05 20:00:00	5.49	34.85	6.92	33.52	7.88	28.45	8.97	33.09	12.93	1088.92	94.22	39.986
2019-01-05 20:15:00	5.2	35.81	6.43	35.94	7.52	30.25	8.21	35.87	12.85	1088.92	94.29	44.773
2019-01-05 20:30:00	6.2	40.83	8	40.43	9.05	36.69	9.78	42.67	12.81	1088.25	94.4	43.757
2019-01-05 20:45:00	5.77	39.11	7.31	36.87	8.26	33.37	9.19	39.56	12.82	1088.25	94.38	40.869
2019-01-05 21:00:00	6.1	38.78	7.57	34.43	8.57	31.19	9.3	36.35	12.82	1088.25	94.48	40.675
2019-01-05 21:15:00	5.67	31.74	7.4	29.25	8.22	25.38	9.17	32.48	12.73	1088.92	94.36	41.032
2019-01-05 21:30:00	5.73	34.65	7.27	2.21	8.22	28.85	8.85	33.84	12.77	1088.25	94.28	37.932
2019-01-05 21:45:00	6.31	39.06	8.09	0.48	8.85	32.89	9.56	37.29	12.76	1088.92	94.12	41.725
2019-01-05 22:00:00	5.25	38.97	7.2	7.4	7.94	34.54	8.37	40.93	12.7	1088.92	93.95	42.656
2019-01-05 22:15:00	5.78	41.28	7.45	18.42	8.12	30.53	9.1	39.1	12.76	1088.25	93.73	39.352
2019-01-05 22:30:00	5.45	35.79	6.65	32.38	7.27	28.31	7.7	37.53	12.78	1088.92	93.58	36.251
2019-01-05 22:45:00	6.22	34.94	7.21	0.49	8.08	30.06	8.61	35.52	12.77	1088.92	93.42	40.485
2019-01-05 23:00:00	6.39	33.83	8.02	7.31	8.95	25.81	9.71	31.64	12.76	1088.92	92.74	35.492
2019-01-05 23:15:00	5.49	35.37	6.86	31.5	7.52	24.77	8.6	31.32	12.82	1088.92	92.38	39.804
2019-01-05 23:30:00	6.33	33.87	7.85	2.36	8.7	27.21	9.69	34.6	12.75	1088.92	92.54	36.018
2019-01-05 23:45:00	6.39	32.81	7.69	29.68	8.35	24.87	9.19	29.96	12.7	1088.92	92.87	37.768
2019-01-06	6.45	31.76	7.36	27.69	8.22	22.68	9.19	30.14	12.68	1088.92	93.25	35.034
2019-01-06 00:15:00	6.37	37.58	8.15	33.86	8.89	29.71	9.71	36.62	12.55	1088.92	93.55	31.919
2019-01-06 00:30:00	6.22	43.46	7.49	42.45	8.15	37.43	8.96	44.65	12.69	1089.58	93.76	26.317
2019-01-06 00:45:00	4.15	43.65	5.59	36.62	6.26	36.81	6.86	43.9	12.74	1088.92	93.94	24.287
2019-01-06 01:00:00	5.06	66.96	7.23	56.08	7.99	51.29	8.41	57.78	12.49	1088.92	94	35.981
2019-01-06 01:15:00	4.78	49.12	6.94	4.32	7.5	43.03	7.4	49.24	12.5	1088.25	93.84	34.914
2019-01-06 01:30:00	5.73	50.5	7.54	46.88	8.04	40.7	8.4	49.09	12.54	1088.92	93.44	40.117
2019-01-06 01:45:00	6.16	47	8.42	46.92	9.07	41.24	9.29	48.78	12.49	1088.92	93.13	37.808
2019-01-06 02:00:00	4.94	55.7	8.15	50.94	8.67	46.73	8.89	51.09	12.67	1088.25	92.77	37.445
2019-01-06 02:15:00	5.1	50	7.58	48.16	8.16	41.69	8.53	47.05	12.64	1088.92	92.5	33.727
2019-01-06 02:30:00	5.06	50.18	7.48	48.98	8.34	42.84	8.92	48.92	12.67	1088.92	92.18	33.12
2019-01-06 02:45:00	5.37	45.67	7.22	46.05	7.85	40.41	8.28	47.22	12.74	1088.92	91.73	39.657
2019-01-06 03:00:00	5.44	51.63	8.35	50.68	9.18	44.14	9.39	50.9	12.77	1088.92	91.31	40.308
2019-01-06 03:15:00	5.41	46.76	7.61	48.24	8.02	42.02	8.24	50.1	12.79	1088.92	90.84	39.58
2019-01-06 03:30:00	5.07	47.08	6.48	44.81	6.97	39.88	7.18	46.12	12.73	1088.92	90.02	38.791
2019-01-06 03:45:00	5.86	38.37	7.35	40.07	8.34	35.51	9.22	41.86	12.91	1088.92	89.31	39.063
2019-01-06 04:00:00	6.27	41.11	7.93	42.4	8.66	39.3	9.21	46.26	12.83	1088.92	89.29	35.457
2019-01-06 04:15:00	6.61	44.2	8.62	41.2	9.37	37.96	9.7	43.25	12.89	1088.92	88.6	34.351
2019-01-06 04:30:00	5.7	39.5	7.58	35.9	8.55	31.36	9.2	35.74	12.91	1088.92	88.98	37.322
2019-01-06 04:45:00	5.68	39.03	7.34	12.79	8.41	32.87	9.13	37.1	12.92	1088.92	88.39	32.904
2019-01-06 05:00:00	5.59	36.32	6.99	32.21	8.13	28.52	9.02	34.11	12.93	1088.92	88.1	30.085
2019-01-06 05:15:00	5.85	40.64	7.31	36.7	8.44	33.15	9.21	39.16	13.11	1088.92	87.42	26.754
2019-01-06 05:30:00	5.81	39.52	7.38	37.68	8.25	33.45	8.85	40.5	13.1	1088.25	87.07	31.345
2019-01-06 05:45:00	6.57	43.11	8.32	40.05	9.31	37.7	10.13	44.28	13.17	1089.58	86.24	33.94
2019-01-06 06:00:00	6.61	37.69	8.06	13.04	9.22	34.03	10.07	40.66	13.3	1089.58	86.12	36.214
2019-01-06 06:15:00	6.76	40.42	8.23	3.11	9.09	35.43	9.67	41.51	13.28	1088.92	84.77	35.873
2019-01-06 06:30:00	6.29	39.83	8.13	38.21	9.46	34.46	10.35	41.49	13.33	1088.92	84.31	36.297
2019-01-06 06:45:00	6.14	42.06	8.29	40.67	9.4	36.1	9.91	41.92	13.46	1088.92	83.82	41.517
2019-01-06 07:00:00	6.72	46.2	9.11	44.12	9.99	40.61	10.73	46.92	13.29	1088.92	82.73	48.923
2019-01-06 07:15:00	5.96	46.37	8.32	46.56	8.99	41.92	9.37	47.08	13.4	1088.92	82.61	49.415
2019-01-06 07:30:00	6.03	45.01	8.15	44.73	9.05	42.49	9.38	49.52	13.37	1088.92	83.61	55.637
2019-01-06 07:45:00	7	47.04	9.65	47.39	10.31	43.53	10.48	49.38	13.25	1088.92	83.06	63.002
2019-01-06 08:00:00	7.57	45.05	10.51	45.49	11.86	41.98	12.76	48.68	13.27	1088.92	83.46	57.902
2019-01-06 08:15:00	6.99	54.15	10.55	50.83	11.62	46.09	11.58	53.99	13.27	1088.25	83.6	58.006
2019-01-06 08:30:00	6.85	53.63	9.83	49.37	10.66	45.41	10.92	51.8	13.38	1089.58	82.65	66.304
2019-01-06 08:45:00	7.51	49.04	10.43	47.78	11.39	43.71	12.18	48.75	13.32	1088.92	81.65	65.566
2019-01-06 09:00:00	8.57	44.66	11.05	44.45	12.15	40.43	12.83	46.56	13.39	1088.92	81.58	65.392
2019-01-06 09:15:00	8.34	48.92	11.55	47.39	12.7	41.73	13.32	47.07	13.44	1088.92	81.18	71.035
2019-01-06 09:30:00	7.39	48.05	10.27	44.24	11.38	39.12	12	46.22	13.42	1089.58	81.72	65.547
2019-01-06 09:45:00	7.96	43.51	10.52	41.49	11.6	38.09	12.09	45.21	13.38	1089.58	82.76	60.99
2019-01-06 10:00:00	7.11	44.36	9.25	42.85	10.37	38.73	10.93	46.43	13.48	1088.92	83.62	59.044
2019-01-06 10:15:00	8.09	39.73	10.01	38.48	10.81	35.74	11.37	43.98	13.48	1088.92	83.55	56.198
2019-01-06 10:30:00	6.97	43.69	9.22	41.25	10.35	36.19	11.16	44.87	13.49	1088.92	83.77	50.5
2019-01-06 10:45:00	7.36	43.59	9.67	41.12	10.55	36.47	10.95	42.17	13.35	1088.92	83.83	51.628
2019-01-06 11:00:00	7.39	42.03	9.37	39.68	10.42	35.03	11.09	41.55	13.44	1088.92	83.23	50.885
2019-01-06 11:15:00	7.38	41.15	9.78	40.46	10.69	36.36	11.13	43.02	13.38	1088.92	83.43	52.237
2019-01-06 11:30:00	7.63	42.3	9.67	39.55	10.58	34.72	11.29	41.43	13.57	1088.92	83.78	53.724
2019-01-06 11:45:00	7.8	40.26	9.87	35.43	10.66	35.04	11.19	42.16	13.58	1088.92	83.74	58.366
2019-01-06 12:00:00	7.27	41.41	9.47	39.3	10.48	34.97	10.92	42.1	13.68	1088.92	83.27	65.007
2019-01-06 12:15:00	7.59	48.62	10.61	45.18	11.67	40.44	12.2	44.43	13.78	1088.92	82.09	68.765
2019-01-06 12:30:00	8.1	43.11	10.75	10.98	12.22	35.94	13.35	42.23	13.68	1088.92	82.1	64.94
2019-01-06 12:45:00	7.5	40.61	9.46	37.7	10.12	32.79	10.63	37.2	13.54	1088.92	83.46	64.403
2019-01-06 13:00:00	7.51	42.4	9.5	0.46	10.35	32.78	10.44	35.11	13.32	1088.92	83.93	64.97
2019-01-06 13:15:00	7.9	41.04	9.83	39.2	10.77	34.07	11.07	38.9	13.34	1088.92	83.35	64.334
2019-01-06 13:30:00	8.11	44.84	10.53	41.28	11.84	37.06	12.81	41.55	13.35	1088.25	79.18	68.719
2019-01-06 13:45:00	8.85	42.81	10.96	40.28	12.3	36.5	13.01	41.19	13.38	1088.92	79.12	62.75
2019-01-06 14:00:00	7.76	44.45	10.1	42.68	10.95	37.53	11.27	43.32	13.36	1088.92	80.21	64.546
2019-01-06 14:15:00	6.76	42.65	9	43.12	10.03	37.53	10.69	44.31	13.36	1088.92	80.9	66.07
2019-01-06 14:30:00	7.72	40.48	10.01	39.76	11.3	36.67	12.02	42.36	13.21	1088.92	80.9	64.255
2019-01-06 14:45:00	7.63	38.49	10.02	36.89	11.16	33.25	12.12	38.61	13.11	1088.92	80.68	64.107
2019-01-06 15:00:00	7.28	40.21	9.94	0.34	10.96	36.24	11.7	41.87	13.22	1088.92	79.89	62.223
2019-01-06 15:15:00	8.19	40.1	10.48	2.18	11.69	36.1	12.62	42.42	13.31	1088.92	77.28	61.194
2019-01-06 15:30:00	7.21	38.67	9.06	36.07	10.26	32.88	10.81	38.81	13.25	1088.92	78.44	57.471
2019-01-06 15:45:00	6.87	44.02	8.44	40.66	9.06	36.68	9.37	40.22	13.25	1088.92	80.78	57.968
2019-01-06 16:00:00	7.51	42.99	9.9	8.07	10.95	38.1	11.89	43.49	13.19	1088.92	79.44	57.395
2019-01-06 16:15:00	7.02	43.27	8.95	0.43	10.1	37.85	11.17	42.74	13.2	1088.25	78.49	61.637
2019-01-06 16:30:00	6.9	44.61	8.73	16.52	9.84	38.83	10.32	43.47	12.96	1088.25	77.97	60.558
2019-01-06 16:45:00	6.53	41.56	8.63	39.02	9.42	34.95	10.11	42.47	13.04	1088.92	75.66	63.312
2019-01-06 17:00:00	7.01	45.26	9.14	43.89	9.89	39.21	10.55	45.06	13.08	1088.92	75.82	58.764
2019-01-06 17:15:00	6.89	45.14	8.97	43.57	9.42	38.22	9.58	42.94	12.95	1088.25	76.71	55.071
2019-01-06 17:30:00	7.41	43.44	9.46	38.66	10.77	34.95	11.39	40.25	13	1088.92	75.98	54.061
2019-01-06 17:45:00	6.87	42.53	8.75	38.81	9.81	35.81	10.79	41.57	13.08	1088.92	77.04	62.424
2019-01-06 18:00:00	7.27	51.23	9.96	44.88	10.55	42.45	11.12	47.31	12.98	1088.92	76.49	54.266
2019-01-06 18:15:00	7.09	41.77	9.34	41.16	10.39	37.99	11.19	43.8	13.04	1088.92	75.84	52.703
2019-01-06 18:30:00	6.29	38.54	8.07	37.12	9.31	34.57	10	39.56	13.14	1088.92	76.03	61.737
2019-01-06 18:45:00	7.1	40.47	9.08	39.67	10.29	37.14	11.73	43.49	13.12	1088.92	74.78	64.757
2019-01-06 19:00:00	6.86	41.13	8.83	0.42	9.99	37.36	10.66	43.7	13.09	1088.92	74.32	67.106
2019-01-06 19:15:00	7.78	38.74	9.75	0.44	11.06	35.68	11.73	42.5	13.22	1088.92	73.21	66.13
2019-01-06 19:30:00	7.05	40.53	8.97	0.46	10.33	35.74	11.17	41.38	13.26	1088.92	73.92	64.968
2019-01-06 19:45:00	6.93	41.93	8.96	21.01	9.69	36.61	10.27	40.95	13.22	1088.92	73.54	64.892
2019-01-06 20:00:00	7.51	45.98	9.77	43.11	10.34	39.15	10.68	44.75	13.2	1088.92	74.78	63.707
2019-01-06 20:15:00	6.94	41.44	8.78	39.33	10	36.52	10.73	43.46	13.29	1088.92	76.67	69.281
2019-01-06 20:30:00	7.6	46.14	10.08	44.43	11.14	40.05	11.91	44.47	13.12	1088.92	76.4	72.003
2019-01-06 20:45:00	7.22	44.17	9.47	42.6	10.35	38.95	10.61	43.98	13.04	1088.92	76.98	73.209
2019-01-06 21:00:00	7.97	41.39	10.22	39.8	11.63	37.07	12.49	43.68	13.11	1088.92	78.1	76.446
2019-01-06 21:15:00	8.28	41.65	10.8	37.52	12.28	35.05	13.06	40.56	13.05	1088.92	79.15	77.62
2019-01-06 21:30:00	8.4	40.89	10.74	38.59	12.2	36.91	12.94	42.95	12.79	1088.92	78.43	79.295
2019-01-06 21:45:00	8.31	40.47	10.34	37.4	11.16	32.71	11.8	38.54	12.77	1088.92	78.27	78.096
2019-01-06 22:00:00	8.62	43.38	11.79	39.51	13.03	35.98	13.89	40.4	12.8	1088.92	78.52	74.078
2019-01-06 22:15:00	7.95	40.91	10.35	36.79	11.41	34.26	12.22	40.51	12.79	1088.92	77.83	71.55
2019-01-06 22:30:00	8.26	41.02	10.65	38.73	11.71	36.83	12.28	42.24	12.68	1088.92	77.61	71.059
2019-01-06 22:45:00	7.78	43.26	9.59	41.11	10.46	37.11	10.77	42.23	12.76	1088.92	77.65	77.608
2019-01-06 23:00:00	7.81	45.4	9.83	41.79	10.69	37.15	11.2	41.65	12.72	1088.92	76.49	73.691
2019-01-06 23:15:00	8.9	38.95	10.88	34.82	11.87	31.49	12.6	36.76	12.79	1088.92	76.56	70.528
2019-01-06 23:30:00	8.05	43.47	10.24	38.48	11.22	35.24	11.86	41.23	12.76	1088.25	77.56	69.023
2019-01-06 23:45:00	8.08	39.62	10.24	37.12	11.16	33.2	11.64	38.01	12.67	1088.25	77.9	70.061
2019-01-07	8.85	45.12	11.03	40.19	12.2	37.5	13.03	42.84	12.71	1088.92	78.65	68.521
2019-01-07 00:15:00	8.49	40.07	10.53	37.66	11.68	34.24	12.29	39.53	12.76	1089.58	79.4	66.591
2019-01-07 00:30:00	7.13	41.52	9.07	38.86	9.75	35.71	10.31	40.9	12.67	1088.25	78.62	67.981
2019-01-07 00:45:00	7.08	38.8	8.81	36.48	9.6	33.98	10.08	40.07	12.73	1088.92	79.32	72.205
2019-01-07 01:00:00	7.88	39.13	9.66	34.16	10.77	32.13	11.43	35.22	12.59	1088.92	78.85	71.579
2019-01-07 01:15:00	7.18	43.53	9.23	38.69	10.14	35.11	10.75	39.06	12.65	1088.92	79.21	68.479
2019-01-07 01:30:00	7.66	40.05	9.46	36.12	10.66	33.36	11.11	38.49	12.62	1088.92	78.61	63.268
2019-01-07 01:45:00	6.19	39.33	7.84	33.85	8.91	29.05	9.84	33.62	12.6	1088.92	79.47	63.012
2019-01-07 02:00:00	7.1	33.64	8.8	30	10.1	26.1	10.56	32.07	12.45	1088.92	79.67	63.244
2019-01-07 02:15:00	7.76	36.7	10.09	31.88	11.18	28.5	12.22	33.74	12.4	1088.92	80.67	64.684
2019-01-07 02:30:00	6.66	33.39	8.19	30.47	9.22	27.54	10.35	32.51	12.37	1089.58	82.35	68.979
2019-01-07 02:45:00	8.67	31.25	10.85	27.3	12.22	24.56	12.83	30.77	12.36	1088.92	82.33	72.468
2019-01-07 03:00:00	8.48	32.19	10.2	28.88	11.39	26.11	12.17	32.77	12.11	1088.92	82.84	70.432
2019-01-07 03:15:00	7.81	35.82	9.55	28.44	10.44	24.51	11.37	28.72	12.01	1088.92	81.99	66.547
2019-01-07 03:30:00	7.76	28.98	9.28	27.08	10.38	24.15	11.91	30.2	12.01	1088.92	81.7	66.483
2019-01-07 03:45:00	7.65	37.47	9.82	32.41	10.99	29.5	11.81	34.97	11.95	1088.92	81.57	64.925
2019-01-07 04:00:00	7.27	34.99	9.05	31.7	10.29	28.56	11.09	31.36	11.87	1088.92	82.02	62.949
2019-01-07 04:15:00	7.59	36.38	9.43	29.24	10.74	26.77	11.71	30.9	11.94	1089.58	81.95	58.95
2019-01-07 04:30:00	7.14	37.08	9.23	33.94	10.43	29.79	11.21	33.43	11.93	1088.92	82.41	51.463
2019-01-07 04:45:00	8.06	28.84	10.2	25.55	11.27	21.85	12.21	27.93	11.98	1089.58	82.53	58.138
2019-01-07 05:00:00	7.36	36.62	9.51	33.4	11.06	30.66	11.94	32.59	11.97	1088.92	83.17	51.044
2019-01-07 05:15:00	7.62	37.39	9.6	31.19	10.62	29.8	11.05	36.14	11.87	1088.25	84.39	48.817
2019-01-07 05:30:00	6.99	38.79	9.24	35.31	10.56	31.68	11.49	36.97	12.03	1088.92	84.73	47.972
2019-01-07 05:45:00	6.92	34.96	8.72	31.61	9.88	29.23	10.63	33.66	11.93	1088.92	85.1	45.717
2019-01-07 06:00:00	6.76	33.1	8.11	24.76	8.97	19.76	10.25	23.98	11.91	1088.92	85.52	44.825
2019-01-07 06:15:00	6.75	34.99	8.03	31.16	9.25	26.77	10.35	31.55	11.94	1088.92	85.99	42.891
2019-01-07 06:30:00	6.5	30.22	8.09	26.78	8.96	23.34	9.79	30.05	11.93	1088.25	86.44	35.036
2019-01-07 06:45:00	6.43	39.74	8.38	33.72	9.45	30.27	10.33	33.23	11.98	1088.92	87.3	34.29
2019-01-07 07:00:00	5.47	32.36	6.63	29.13	7.45	23.49	7.99	27.35	11.97	1088.92	88.29	25.019
2019-01-07 07:15:00	5.86	30.78	7.32	25.09	8.03	19.29	8.79	25.73	11.75	1088.92	88.97	27.999
2019-01-07 07:30:00	6.65	28.4	7.56	22.64	7.98	18.1	8.73	23.58	11.61	1088.92	90.48	27.049
2019-01-07 07:45:00	5.7	37.49	7.29	30.71	8.19	25.88	9.11	28.87	11.62	1088.92	91.43	27.117
2019-01-07 08:00:00	5.14	30.53	5.93	24.86	6.68	19.91	8.14	27.36	11.64	1088.92	92.07	33.378
2019-01-07 08:15:00	5.61	36.07	6.98	30.19	7.72	25.88	8.34	32.17	11.57	1089.58	92.5	30.549
2019-01-07 08:30:00	5.78	31.08	7.02	28.82	7.87	24.9	8.87	29.44	11.7	1089.58	92.67	33.479
2019-01-07 08:45:00	5.88	34.06	7.41	29.65	8.6	24.75	9.5	29.99	11.79	1088.92	92.69	32.544
2019-01-07 09:00:00	5.6	32.02	7.05	29.8	8.07	24.38	9.16	28.84	11.83	1088.92	92.86	28.022
2019-01-07 09:15:00	6.1	33.59	7.62	30.77	8.7	26.21	9.68	31.61	11.81	1088.92	92.94	28.398
2019-01-07 09:30:00	5.84	30.2	7.24	14.97	8.19	23.88	9.3	29.69	11.82	1088.92	93.02	31.675
2019-01-07 09:45:00	5.99	28.23	6.93	22.32	7.6	19.33	8.47	25.33	11.99	1088.92	93.22	31.975
2019-01-07 10:00:00	5.74	36.42	6.99	32.6	7.55	26.99	8.47	32.33	12.1	1088.92	93.35	33.761
2019-01-07 10:15:00	6.12	34.89	7.31	31.93	7.99	26.65	8.7	32.19	12.1	1088.92	93.36	27.831
2019-01-07 10:30:00	5.4	38.49	6.6	34.74	6.94	30.17	7.19	36.48	12.2	1088.92	93.2	30.077
2019-01-07 10:45:00	5.4	31.07	6.66	30.32	7.46	24.89	8.39	30.02	12.16	1089.58	93.06	26.168
2019-01-07 11:00:00	5.93	34.95	7.22	33.25	7.89	28.79	8.33	33.24	12.31	1088.92	92.81	22.92
2019-01-07 11:15:00	5.08	36.14	6.7	30.46	7.28	27.03	8.16	33.12	12.4	1088.92	92.27	28.388
2019-01-07 11:30:00	5.96	35.51	7.6	32.46	8.26	28.23	8.97	32.25	12.54	1088.92	91.84	28.56
2019-01-07 11:45:00	5.5	34.39	7.12	33.97	7.66	26.8	8.39	31.29	12.54	1088.92	91.6	28.083
2019-01-07 12:00:00	5.65	37.05	6.68	31.42	7.21	25.55	8.04	31.3	12.39	1088.92	91.78	28.881
2019-01-07 12:15:00	5.96	39.14	7.4	33.5	8.11	27.01	8.7	29.74	12.46	1088.92	91.6	29.242
2019-01-07 12:30:00	5.57	32.72	6.69	27.47	6.99	20.97	7.46	22.95	12.49	1088.92	91.63	25.466
2019-01-07 12:45:00	5.79	24.02	6.49	17.23	6.89	14.06	7.66	20.03	12.45	1088.92	91.83	27.235
2019-01-07 13:00:00	5.79	26.01	6.69	20.28	7.08	14.33	8	20.61	12.52	1088.92	91.84	22.952
2019-01-07 13:15:00	4.93	28.94	5.85	21.49	6.18	17.4	7.08	23.21	12.57	1088.92	91.42	22.802
2019-01-07 13:30:00	5.4	35.28	6.55	28.71	6.82	20.74	7.69	25.35	12.73	1088.92	91.1	24.202
2019-01-07 13:45:00	6.1	29.97	7.49	26.92	8.2	23.16	8.75	27.79	12.7	1088.92	90.7	25.951
2019-01-07 14:00:00	6.67	30.22	8.09	1.09	9.03	20.61	10.02	24.96	12.85	1088.92	90.27	21.412
2019-01-07 14:15:00	5.75	24.85	6.58	19.65	7.14	15.27	7.7	21.01	12.98	1088.92	89.03	17.537
2019-01-07 14:30:00	4.75	22.88	5.2	16.55	5.26	14.41	6.16	20.46	13.23	1088.25	88	14.323
2019-01-07 14:45:00	4.69	35.3	5.73	30.3	6.4	24.04	6.66	25.17	13.29	1088.92	86.92	14.356
2019-01-07 15:00:00	5.35	35.01	6.9	31.19	7.6	25.42	8.62	28.59	13.38	1088.25	86.3	14.069
2019-01-07 15:15:00	5.34	32.91	6.86	30.75	7.56	26.12	8.37	30.14	13.53	1088.25	85.53	14.718
2019-01-07 15:30:00	4.62	36.33	5.82	32.55	6.55	27.27	7.26	32.18	13.58	1088.25	85.22	13.559
2019-01-07 15:45:00	5.12	34.1	6.35	30.58	6.76	25.44	7.05	31.92	13.63	1088.92	85.15	15.365
2019-01-07 16:00:00	5.3	35.29	6.71	31.94	7.24	26.85	7.87	31.13	13.72	1088.25	85.23	15.308
2019-01-07 16:15:00	4.96	38.26	6.59	32.43	7.37	27.21	7.92	31.29	13.71	1088.25	85.34	15.766
2019-01-07 16:30:00	4.76	36.92	6.36	32.65	7.03	28.62	7.69	32.92	13.72	1088.25	85.53	14.128
2019-01-07 16:45:00	4.7	38.67	5.92	32	6.63	27.13	7.26	30.16	13.69	1088.92	85.41	13.395
2019-01-07 17:00:00	3.97	37.79	5.16	34.72	5.8	31.32	6.27	36.6	13.66	1088.92	85.75	13.343
2019-01-07 17:15:00	4.1	33.78	5.05	32.74	5.73	28.95	6.3	32.86	13.66	1088.92	86.09	16.533
2019-01-07 17:30:00	4.71	26.73	5.63	21.21	5.99	16.96	6.71	24.58	13.65	1088.92	86.36	19.665
2019-01-07 17:45:00	4.64	29.79	5.67	26.59	6.41	22.41	7.3	25.09	13.67	1088.92	86.22	19.76
2019-01-07 18:00:00	4.53	25.11	5.22	20.08	5.98	15.84	7.05	20.23	13.77	1088.92	86.2	18.621
2019-01-07 18:15:00	4.63	38.47	5.98	31.3	6.7	26.27	7.5	31.43	13.82	1089.58	86.07	18.621
2019-01-07 18:30:00	4.74	32.87	5.82	29.35	6.46	24.41	7.38	27.98	13.79	1088.92	86.01	18.621
2019-01-07 19:00:00	4.45	33.04	5.67	30.23	6.46	25.69	7.12	30.59	13.84	1088.92	86.14	18.856
2019-01-07 19:15:00	4.2	33.59	5.49	33.57	6.38	29.3	7.34	34.82	13.85	1088.92	86.18	18.148
2019-01-07 19:30:00	4.07	36.55	5.36	31.87	6.38	28.28	7.22	31.82	13.9	1088.25	85.75	18.591
2019-01-07 19:45:00	4.33	34.78	5.51	32.72	6.42	28.46	7.04	34.49	14	1088.92	85.78	17.137
2019-01-07 20:00:00	3.87	37.69	5.11	33.05	5.82	30.82	6.4	38.25	13.96	1088.92	86.07	14.107
2019-01-07 20:15:00	4.22	41.72	5.31	40.54	5.85	34.29	6.54	37.84	13.97	1088.92	86.18	19.429
2019-01-07 20:30:00	4.44	36.38	6.01	31.83	6.77	26.7	7.3	32.58	13.98	1088.92	85.68	18.97
2019-01-07 20:45:00	4.62	34.89	5.75	33.13	6.68	27.35	7.64	31.24	14.06	1088.92	85.31	17.991
2019-01-07 21:00:00	4.32	36.27	5.62	37.23	6.68	32.67	7.29	36.04	14.08	1088.92	85.29	12.427
2019-01-07 21:15:00	3.53	32.54	4.52	32.52	5.32	27.76	6	32.4	14.1	1088.92	85.39	13.958
2019-01-07 21:30:00	3.84	33.46	5.05	30.61	5.96	27.3	6.88	32.34	14.13	1088.92	85.29	12.93
2019-01-07 21:45:00	3.03	41.44	4.06	38.28	4.78	32.15	5.52	36.33	13.97	1088.92	85.83	16.468
2019-01-07 22:00:00	4.02	39.56	5.31	37.47	6.02	33.2	6.99	38.33	14.01	1088.92	86.33	14.412
2019-01-07 22:15:00	3.45	39.19	4.79	36	5.46	32.08	6.2	35.52	14.04	1088.92	86.23	14.177
2019-01-07 22:30:00	3.31	34.35	4.08	31.13	4.6	26.45	5.66	30.66	14.05	1088.92	86.47	16.967
2019-01-07 22:45:00	3.84	40.37	5.13	36.21	5.66	30.37	6.37	33.76	14.09	1088.92	86.68	14.426
2019-01-07 23:00:00	4.1	44.08	5.57	39.47	6.2	34.39	6.82	40.38	13.94	1089.58	86.75	16.198
2019-01-07 23:15:00	4.65	46.21	5.98	44.33	6.5	38.23	7.19	43.22	13.94	1088.92	86.71	14.011
2019-01-07 23:30:00	4.68	41.95	6.18	39.28	6.91	35.56	7.5	38.97	14.04	1088.92	86.73	12.252
2019-01-07 23:45:00	4.54	39.14	5.98	35.18	6.77	30.57	7.81	36.74	13.95	1088.92	86.83	13.038
2019-01-08	4.73	33.1	6.03	30.71	6.98	26.6	7.66	32.77	13.9	1088.92	87.37	17.113
2019-01-08 00:15:00	4.28	35.94	5.59	34.83	6.29	31.02	7.02	35.02	13.87	1088.92	87.89	16.948
2019-01-08 00:30:00	4.74	32.23	5.97	29.53	6.53	25.74	7.02	31.93	13.8	1088.92	88.06	17.824
2019-01-08 00:45:00	4.32	39.79	5.65	35.94	6.08	31.89	6.41	35.53	13.86	1088.92	88.52	15.509
2019-01-08 01:00:00	3.56	39.48	4.96	37.36	5.93	34.48	6.7	38.81	13.83	1088.92	88.85	13.91
2019-01-08 01:15:00	4.2	36.61	5.02	33.87	5.57	31.41	6.68	37.43	13.87	1088.92	88.45	17.485
2019-01-08 01:30:00	4.19	38.2	5.4	35.42	6.22	33.34	6.89	39.72	13.91	1088.92	88.32	17.376
2019-01-08 01:45:00	4.08	34.75	4.9	31.9	5.35	28.44	6.02	35.3	13.95	1089.58	88.25	17.328
2019-01-08 02:00:00	3.68	39.32	4.83	37.92	5.76	34.78	6.48	41.22	13.95	1088.25	88.16	19.807
2019-01-08 02:15:00	3.54	39.54	4.61	39.92	5.51	38.27	6.13	43.36	14.03	1088.92	88.25	19.856
2019-01-08 02:30:00	4.64	37.25	5.84	35.67	6.84	32.81	7.71	39.47	14.06	1088.92	88.23	17.944
2019-01-08 02:45:00	4.11	32.36	4.89	29.97	5.49	26.85	6.19	32.89	13.99	1088.92	88.68	16.859
2019-01-08 03:00:00	4.26	25.91	5.09	24.56	5.42	21.34	5.84	30.5	13.93	1089.58	89.15	18.996
2019-01-08 03:15:00	4.35	34.21	5.4	25.91	6.32	30.71	6.91	36.89	13.84	1088.92	89.79	20.437
2019-01-08 03:30:00	4.98	38.72	6.37	35.61	7.12	31.99	7.66	37.75	13.77	1088.92	90.62	22.777
2019-01-08 03:45:00	4.71	38.29	6.51	39.37	7.66	34.58	8.51	39.26	13.72	1088.92	91.03	25.008
2019-01-08 04:00:00	4.9	41.24	6.15	39.22	6.94	35.5	7.85	42.54	13.74	1088.92	91.2	25.15
2019-01-08 04:15:00	4.24	35.53	5.63	2.46	6.46	34.97	7.11	41.31	13.66	1088.25	91.38	21.005
2019-01-08 04:30:00	4.72	37.75	5.92	0.5	7.19	30.74	8.04	37.68	13.51	1088.92	91.69	22.911
2019-01-08 04:45:00	5.26	36.08	6.43	0.49	7.17	28.88	8.14	35.25	13.39	1088.92	91.93	23.012
2019-01-08 05:00:00	5.1	30.6	6.64	0.57	7.56	24.7	8.09	33.61	13.35	1088.92	91.9	18.677
2019-01-08 05:15:00	4.65	33.21	5.84	10.57	6.66	29.89	7.59	36.06	13.37	1088.25	91.8	20.217
2019-01-08 05:30:00	4.21	42.36	5.57	0.3	5.99	41.45	6.78	47.42	13.42	1088.25	91.78	20.003
2019-01-08 05:45:00	3.75	44.28	4.98	5.26	5.29	38.54	5.49	42.96	13.45	1088.92	91.78	27.866
2019-01-08 06:00:00	4.45	66.95	6.23	23.25	6.73	51.05	6.74	55.54	13.47	1089.58	91.72	24.234
2019-01-08 06:15:00	4.62	39.87	6.01	0.47	6.47	37.71	6.97	45.59	13.43	1088.25	91.55	23.067
2019-01-08 06:30:00	5.51	50.86	7.38	17.87	8.12	42.08	8.96	47.46	13.33	1088.92	91.58	28.732
2019-01-08 06:45:00	5.26	51.55	7.3	48.66	7.74	43.69	7.9	47.99	13.28	1088.92	91.4	35.557
2019-01-08 07:00:00	5.99	51.33	8.38	47.55	9.14	41.97	9.5	45.99	13.24	1088.92	90.9	45.617
2019-01-08 07:15:00	6.42	43.26	8.17	41.41	8.94	37.37	10.01	43.26	13.19	1088.92	89.81	55.775
2019-01-08 07:30:00	6.5	47.47	8.92	46.24	9.41	39.93	10.16	44.43	13.31	1088.92	88.88	65.393
2019-01-08 07:45:00	6.76	52.28	9.68	47.97	10.22	42.85	10.65	48.19	13.19	1088.92	88.6	60.349
2019-01-08 08:00:00	7.29	39.03	9.04	39.1	10.52	35.28	11.55	40.01	13.22	1088.92	87.77	58.903
2019-01-08 08:15:00	7.44	41.19	9.8	0.38	10.85	37.72	11.65	42.66	13.27	1088.92	87.53	65.775
2019-01-08 08:30:00	7.46	46.82	9.99	5.31	10.72	38.3	11.46	43.09	13.31	1088.92	87.62	67.554
2019-01-08 08:45:00	7.46	46.82	9.99	5.31	10.72	38.3	11.46	43.09	13.31	1088.92	87.62	56.684
2019-01-08 09:00:00	7.64	39.27	9.83	38.51	11.29	35.38	12.14	40.29	13.26	1088.92	88.19	50.995
2019-01-08 09:15:00	8.34	40.11	10.41	38.24	11.2	34.29	11.84	39.49	13.12	1088.92	89.35	55.137
2019-01-08 09:30:00	8.43	40.71	10.56	27.98	11.91	37.81	13.06	43.16	13.02	1088.92	89.54	53.957
2019-01-08 09:45:00	8.79	40.95	11.61	23.05	13.02	36.23	13.88	41.33	13	1089.58	89.34	54.336
2019-01-08 10:00:00	8.1	37.49	9.76	34.88	10.84	30.31	11.72	36.64	12.94	1088.92	89.18	57.443
2019-01-08 10:15:00	7.39	35.58	9.46	33.68	10.89	29.78	11.8	35.29	12.92	1089.58	89.54	58.54
2019-01-08 10:30:00	7.26	40.47	9.03	39.15	9.99	35.01	11.05	40.28	13.01	1088.92	89.49	58.712
2019-01-08 10:45:00	7.31	40.83	9.31	28.18	10.01	35.85	10.85	40.86	13.15	1088.92	88.61	62.823
2019-01-08 11:00:00	8	40.55	10.4	9.9	11.17	32.65	12.01	38.38	13.14	1089.58	87.62	68.294
2019-01-08 11:15:00	7.32	48.44	9.75	0.43	10.57	36.51	11.16	40.59	13.22	1088.92	87.32	67.678
2019-01-08 11:30:00	7.44	42.35	9.93	25.18	10.78	37.66	11.46	43.17	13.22	1088.92	86.5	69.693
2019-01-08 11:45:00	7.11	42.9	8.99	37.79	9.96	33.21	10.5	38.81	13.26	1088.92	85.64	72.492
2019-01-08 12:00:00	7.85	32.25	9.52	29.37	10.34	25.76	11.33	32.28	13.24	1088.92	85.66	69.318
2019-01-08 12:15:00	7.79	43.82	9.88	41.21	10.86	37.85	11.61	43.43	13.19	1088.92	85.45	63.089
2019-01-08 12:30:00	7.7	40.56	9.89	38.54	10.78	34.42	11.1	42.4	13.14	1088.92	84.89	65.748
2019-01-08 12:45:00	7.95	42.48	9.98	40.99	11.08	36.2	11.89	41.86	13.29	1088.92	84.07	66.508
2019-01-08 13:00:00	7.32	40.58	9.16	36.18	10.05	32.1	10.69	36.96	13.27	1088.92	84.32	70.676
2019-01-08 13:15:00	8.31	36.1	10.24	34.33	11.38	30.68	12.25	36.16	13.19	1088.25	84.51	71.809
2019-01-08 13:30:00	7.97	40.93	10.12	38.15	11.31	33.85	12.12	38.73	13.07	1088.92	84.95	75.665
2019-01-08 13:45:00	8.25	40.15	9.97	36.41	10.68	31.29	11.48	37.01	13.15	1088.92	84.4	76.492
2019-01-08 14:00:00	8.25	36.65	10.22	32.5	11.26	29.05	11.8	35.33	13.01	1088.92	83.98	72.564
2019-01-08 14:15:00	8	35.72	9.8	32.82	11.33	29.64	12.11	34.65	13.05	1088.92	83.67	70.883
2019-01-08 14:30:00	8.4	40.02	11	39.42	12.2	34.4	13.24	39.68	12.98	1088.92	83.83	71.97
2019-01-08 14:45:00	8.21	39.73	10.56	38.81	11.73	34.95	12.47	40.78	13.07	1088.92	83.7	71.353
2019-01-08 15:00:00	8	41.13	10.4	39.13	11.67	35.33	12.75	41.65	12.94	1088.92	83.88	70.697
2019-01-08 15:15:00	7.63	39.35	9.9	38.51	11.11	36.34	11.65	41.41	12.81	1088.92	84.39	70.492
2019-01-08 15:30:00	7.67	36.71	9.63	37.41	11.35	34.44	12.35	40.83	12.76	1088.92	83.78	75.485
2019-01-08 15:45:00	7.91	39.06	10.17	38.18	11.27	33.71	12.44	39.49	12.73	1088.92	83.76	71.154
2019-01-08 16:00:00	8.37	45.4	11.06	40.94	12.25	37.34	12.93	42.6	12.8	1088.92	83.93	71.519
2019-01-08 16:15:00	7.93	42.54	10.48	40.33	11.86	36.5	12.82	41.5	12.75	1088.25	83.92	77.386
2019-01-08 16:30:00	7.83	40.97	9.9	38.62	11.03	35.2	11.54	38.65	12.7	1088.92	84.79	80.48
2019-01-08 16:45:00	7.34	35.78	9.24	33.67	10.42	30.48	11.21	36.17	12.53	1088.92	87.33	83.462
2019-01-08 17:00:00	8.22	39.55	10.62	39.01	11.89	35.39	12.7	38.69	12.3	1088.92	89.84	83.657
2019-01-08 17:15:00	7.52	41.36	9.4	39.72	10.41	33.86	11.16	38.54	12.13	1088.25	91.13	84.277
2019-01-08 17:30:00	7.33	35.82	9.35	33.2	10.45	30.01	11.6	35.97	12.05	1088.92	91.81	79.692
2019-01-08 17:45:00	7.38	38.21	9.28	36.18	10.73	32.28	12.47	39.02	12.02	1089.58	92.36	82.927
2019-01-08 18:00:00	7.88	35.19	9.57	34.06	10.96	30.45	11.83	38.2	12.03	1088.92	92.63	83.762
2019-01-08 18:15:00	7.72	37.62	9.86	36.59	11.05	30.43	12.25	37.07	12.09	1088.92	92.98	83.709
2019-01-08 18:30:00	7.68	33.98	9.5	32.05	10.77	28.94	11.65	36.09	12.01	1088.92	93.27	85.664
2019-01-08 18:45:00	8.49	33.49	10.54	32.85	12.15	27.99	13.16	34.81	11.92	1088.92	93.32	86.144
2019-01-08 19:00:00	8.84	34.37	10.97	31.73	12.31	27.52	13.02	35.18	11.92	1088.92	93.44	84.824
2019-01-08 19:15:00	8.46	33.75	10	33.87	11.46	30.31	12.32	37.08	11.92	1088.92	93.58	89.009
2019-01-08 19:30:00	8.87	41.07	10.81	38.34	11.7	33.99	12.67	38.15	11.93	1088.92	93.35	89.042
2019-01-08 19:45:00	7.82	37.62	10.01	37.08	11.17	32.63	12	38.34	11.99	1088.92	93.17	89.97
2019-01-08 20:00:00	9.16	32.83	11.52	31.49	13.08	27.86	14.04	33.67	11.84	1088.92	92.86	88.561
2019-01-08 20:15:00	8.54	32.21	10.46	30.59	11.81	27.94	13.1	35.91	11.83	1088.92	92.39	89.437
2019-01-08 20:30:00	9.35	38.99	11.73	35.8	13.15	32.24	13.74	36.57	11.63	1088.92	91.81	86.914
2019-01-08 20:45:00	9.11	35.39	11.44	34.68	13.32	31.25	14.49	36.01	11.67	1088.92	91.85	90.189
2019-01-08 21:00:00	9.46	38.66	11.63	35.19	12.95	30.46	14.36	36.21	11.76	1088.92	91.7	90.345
2019-01-08 21:15:00	9.06	38.92	11.51	35.61	13.01	31.74	14.37	36.23	11.68	1088.92	91.63	90.969
2019-01-08 21:30:00	9.29	35.61	11.53	32.58	12.76	29.31	14.05	35.78	11.59	1088.92	91.78	92.087
2019-01-08 21:45:00	9.41	35.32	11.38	34.3	12.7	31.32	14.04	37.23	11.41	1088.92	91.86	93.64
2019-01-08 22:00:00	9.45	35.81	12.1	21.27	13.45	29.34	14.61	35.53	11.3	1088.92	91.87	93.68
2019-01-08 22:15:00	9.25	34.2	11.41	0.5	12.68	29.89	14.14	35.34	11.37	1088.92	91.96	90.164
2019-01-08 22:30:00	10	39.54	12.17	0.47	13.48	32.05	14.83	38.98	11.34	1089.58	91.85	89.451
2019-01-08 22:45:00	9.47	36.02	12.22	0.51	13.88	27.58	14.57	33.97	11.12	1089.58	92.01	89.611
2019-01-08 23:00:00	9.38	35.99	11.55	12.56	13.23	29.36	14.08	37.27	11.21	1089.58	92.23	91.819
2019-01-08 23:15:00	7.68	38.85	9.79	36.8	10.93	30.82	12.2	35.16	11.11	1088.92	92.18	89.113
2019-01-08 23:30:00	9.22	38.15	11.77	31.22	12.84	27.41	13.57	34.94	11.16	1088.92	91.98	86.814
2019-01-08 23:45:00	10.19	35.57	12.3	32.56	13.64	27.21	14.36	32.69	11.01	1088.92	91.55	86.435
2019-01-09	9.1	34.68	11.14	31.39	12.64	27.53	14.1	34.06	11.01	1088.92	91.03	89.09
2019-01-09 00:15:00	10.24	32.95	12.23	0.77	13.45	23.9	14.76	30.19	10.98	1088.25	90.64	89.673
2019-01-09 00:30:00	8.5	35.14	10.54	32.65	12.24	29.16	13.31	33.66	11.14	1088.92	90.01	88.386
2019-01-09 00:45:00	9.53	33.75	11.86	29.8	13.09	25.7	14.01	33.27	11.19	1088.92	89.37	87.935
2019-01-09 01:00:00	8.95	38.09	11.03	29.57	12.36	29.38	13.51	33.16	11.06	1088.92	89.06	88.732
2019-01-09 01:15:00	10.4	40.48	13.53	34.66	14.86	31.47	15.55	35.6	11.19	1088.92	88.63	92.233
2019-01-09 01:30:00	9.5	38.44	11.96	11.41	13.56	29.87	14.43	36.57	11.23	1088.92	87.2	92.051
2019-01-09 01:45:00	10.04	36.89	12.44	22.65	13.77	27.47	14.91	34.1	11.3	1088.92	86.22	91.833
2019-01-09 02:00:00	9.93	35.96	12.54	35.16	14.08	31.4	15.28	37.28	11.01	1088.92	85.72	94.413
2019-01-09 02:15:00	10.34	34.62	13.71	33.57	15.39	29.51	16.45	34.6	10.99	1088.92	84.6	93.135
2019-01-09 02:30:00	10.75	39.43	13.95	36.9	15.54	32.28	17.04	37.41	11.02	1088.92	83.37	91.784
2019-01-09 02:45:00	9.42	39.17	11.89	37.5	13.28	32.71	14.13	37.52	11.07	1088.92	83.02	91.721
2019-01-09 03:00:00	10.16	35.97	12.86	33.68	14.32	29.93	15.16	34.11	11.13	1088.92	82.35	92.127
2019-01-09 03:15:00	9.91	40.16	12.58	38.53	13.97	34.16	14.74	37.29	11.24	1089.58	81.53	92.062
2019-01-09 03:30:00	8.98	39.15	11.58	34.95	12.82	31.55	13.63	36.04	11.2	1089.58	80.91	91.472
2019-01-09 03:45:00	10.42	38.42	12.86	38.72	14.38	33.37	15.46	37.21	11.19	1088.92	80.08	93.168
2019-01-09 04:00:00	9.18	41.16	11.74	38.69	12.88	34.49	13.7	39.61	11.19	1088.92	82.45	91.992
2019-01-09 04:15:00	9.49	37.22	11.92	36.46	13.33	32.8	13.65	39.42	11.07	1088.92	83.58	92.175
2019-01-09 04:30:00	9.89	42.41	12.82	40.85	14.44	36.61	15.22	40.98	11.01	1088.92	82.46	92.338
2019-01-09 04:45:00	10.12	43.82	12.52	40.77	13.72	36.74	14.47	41.05	11	1089.58	82.56	91.974
2019-01-09 05:00:00	9.04	40.19	11.25	37.81	12.66	35.29	13.94	40.99	11.01	1089.58	82.38	91.163
2019-01-09 05:15:00	9.24	43.4	12.36	42.74	13.64	39.03	14.44	44.53	10.97	1089.58	81.83	91.57
2019-01-09 05:30:00	8.53	35.93	10.56	35.67	12.01	31.28	13.02	37.76	11.04	1088.92	81.58	88.632
2019-01-09 05:45:00	9.1	38.12	11.33	35.83	12.49	33	13.27	37.34	10.94	1088.92	82.15	91.525
2019-01-09 06:00:00	8.99	37.48	11.26	28.05	12.73	30.11	14	36.68	10.87	1089.58	82.03	91.119
2019-01-09 06:15:00	9.65	37.95	12.05	36.93	13.36	33.59	14.38	38.86	11.01	1089.58	81.27	91.491
2019-01-09 06:30:00	9.46	39.44	11.76	37.85	13.32	33.9	14.34	39.1	11	1089.58	80.56	90.307
2019-01-09 06:45:00	9.14	35.84	11.67	24.33	13.15	30.78	14.24	36.3	11.07	1088.92	79.82	90.394
2019-01-09 07:00:00	9	43.56	11.53	38.7	12.64	36.76	13.42	41	11.18	1089.58	79	87.326
2019-01-09 07:15:00	10.09	40.25	12.88	37.09	14.22	33.88	15.4	39.08	11.01	1088.92	78	89.228
2019-01-09 07:30:00	8.84	41.25	11.39	14.5	12.95	33.53	13.36	37.76	11.19	1088.92	77.97	90.545
2019-01-09 07:45:00	9.1	38.35	11.48	0.47	12.48	32.74	13.07	36.03	11.2	1088.92	77.86	89.795
2019-01-09 08:00:00	8.81	35.84	10.89	21	12.17	29.74	13.34	34.93	10.92	1088.92	77.79	89.223
2019-01-09 08:15:00	9.2	36.82	11.7	17.1	13.08	33.02	13.76	38.5	11.06	1088.92	77.65	90.815
2019-01-09 08:30:00	9.08	34.02	11.2	32.43	12.56	29.2	13.8	34.91	11	1088.92	77.77	91.381
2019-01-09 08:45:00	9.09	42.21	11.57	37.01	12.7	33.95	13.29	38.28	10.94	1088.92	78.01	89.345
2019-01-09 09:00:00	9.26	39.08	12.28	34.49	13.75	31.72	14.31	35.85	10.85	1089.58	79.12	90.791
2019-01-09 09:15:00	8.87	37.83	10.28	22.01	11.48	28.81	12.34	34.65	10.87	1088.92	79.97	89.408
2019-01-09 09:30:00	8.92	34.75	11.39	29.63	13.34	26.69	14.8	31.03	10.87	1089.58	82.23	88.948
2019-01-09 09:45:00	9.19	33.68	11.43	30.23	13.19	26.79	14.33	31.32	10.76	1089.58	83.52	86.307
2019-01-09 10:00:00	8.35	37.81	10.91	33.27	12.2	30.64	12.58	34	10.75	1088.92	83.77	87.67
2019-01-09 10:15:00	8.63	39.02	10.84	34.94	11.91	31.5	12.38	36.37	11.04	1089.58	83.02	79.783
2019-01-09 10:30:00	9.12	37.22	10.94	32.76	11.97	29.99	12.58	35.15	11.14	1089.58	81.94	76.636
2019-01-09 10:45:00	8.79	34.76	10.72	31.82	12.29	28.57	13.02	33.5	11.04	1089.58	81.98	79.556
2019-01-09 11:00:00	7.71	40.73	9.95	34.71	11.05	32.63	11.66	38.31	11.09	1089.58	82.49	83.571
2019-01-09 11:15:00	8.48	40.79	11	37.77	11.95	36.15	12.7	39.69	11.12	1088.92	82.31	74.201
2019-01-09 11:30:00	8.53	40.06	10.86	35.45	11.94	32.03	12.59	36.78	11	1088.92	81.3	79.639
2019-01-09 11:45:00	8.55	33.52	10.77	12.66	12.01	25.13	13.26	30.04	11.17	1088.92	80.98	76.192
2019-01-09 12:00:00	8.3	39.1	10.67	0.47	11.6	31.68	12.31	35.59	11.25	1088.92	81.42	71.088
2019-01-09 12:15:00	7.88	41.98	10.11	0.53	10.99	33.08	11.22	36.05	11.12	1088.92	81.44	75.408
2019-01-09 12:30:00	9.13	47.75	11.32	0.75	12.3	37.33	12.79	41.36	11.27	1089.58	81.41	75.406
2019-01-09 12:45:00	8.45	34.88	10.2	0.64	11.59	27.91	12.5	34.08	11.2	1089.58	82.11	79.388
2019-01-09 13:00:00	8.46	40.37	10.43	36.39	11.66	32.51	12.28	37.45	10.99	1088.92	83.18	73.461
2019-01-09 13:15:00	8.04	40.15	10.3	33.78	11.44	30.39	12.39	35.93	11.15	1088.25	83.86	70.285
2019-01-09 13:30:00	9.35	46.74	12.2	43.25	13.34	38.84	13.72	42.06	11.19	1088.92	84.04	71.902
2019-01-09 13:45:00	8.87	41.24	11.21	38.56	12.15	35.09	12.79	40.17	11.06	1088.92	83.95	79.565
2019-01-09 14:00:00	8.23	36.57	10.91	31.89	12.49	28.03	13.3	31.58	11.06	1088.92	83.81	76.703
2019-01-09 14:15:00	8.04	39.89	10.27	1.94	11.46	31.84	11.99	35.98	11.09	1088.92	84.68	72.222
2019-01-09 14:30:00	8.97	36.77	10.74	0.56	11.73	29.59	12.79	33.67	11.22	1088.92	85.22	75.968
2019-01-09 14:45:00	8.74	40.28	11.3	0.54	12.66	33.56	13.43	38.65	11.16	1088.92	85	71.693
2019-01-09 15:00:00	8.16	35.52	10.34	0.66	11.51	30.57	12	34.76	11.23	1088.92	84.85	67.858
2019-01-09 15:15:00	9.17	30.97	11.63	0.61	12.73	24.45	13.6	30.31	11.3	1089.58	85.19	58.253
2019-01-09 15:30:00	8.14	37.75	10.09	0.59	11.48	30.9	12.58	34.82	11.24	1088.92	86.59	61.831
2019-01-09 15:45:00	8.25	41.57	10.41	37.07	11.45	34.26	12.05	38.13	11.23	1088.92	87.48	70.649
2019-01-09 16:00:00	8.27	39.79	10.76	37.91	12.13	35.47	12.69	39.43	11.18	1088.92	88.51	66.193
2019-01-09 16:15:00	8.17	42.28	11.08	40.42	12.01	37.35	12.73	41.35	11.11	1088.92	89.09	65.826
2019-01-09 16:30:00	8.08	38.78	9.77	34.36	10.98	31.55	12.06	35.76	11.07	1088.92	88.76	67.64
2019-01-09 16:45:00	8.54	41.72	10.82	38.13	11.88	34.93	12.63	39.02	11.12	1088.92	88.91	61.984
2019-01-09 17:00:00	8.98	39.48	10.88	37.05	11.89	34.29	12.81	38.41	11.09	1088.92	89.52	67.734
2019-01-09 17:15:00	7.95	34.85	9.76	33.69	10.87	30.99	11.61	36.29	11.09	1088.92	90.34	69.919
2019-01-09 17:30:00	8.7	38.95	10.88	36.03	11.95	33.54	12.93	39.33	11.14	1088.92	90.34	61.522
2019-01-09 17:45:00	7.95	34.17	10.3	32.43	12.06	28.13	12.97	34.31	11.08	1088.92	91.17	65.949
2019-01-09 18:00:00	8.57	36.61	10.78	34.26	11.92	31.16	12.65	37.83	11.01	1089.58	91.42	68.696
2019-01-09 18:15:00	7.74	39.71	9.43	35.62	10.88	31.31	11.97	35.57	11.09	1088.92	91.66	70.456
2019-01-09 18:30:00	8.5	42.19	10.6	40.3	11.51	35.27	12.42	38.24	11.08	1089.58	92.02	65.203
2019-01-09 18:45:00	8.15	39.97	10.08	37.91	11.39	34.61	12.25	39.38	11.18	1089.58	92.16	66.962
2019-01-09 19:00:00	7.62	34.42	9.73	31.64	11.2	26.78	12.62	31.89	11.13	1089.58	92.14	63.165
2019-01-09 19:15:00	7.41	29.91	8.89	26.78	9.89	19.94	10.84	26.52	11.19	1089.58	91.85	57.099
2019-01-09 19:30:00	7.14	31.71	8.66	28.03	9.63	22.77	10.96	28.51	11.2	1089.58	91.96	45.099
2019-01-09 19:45:00	6.56	37.5	8.28	31.53	9.25	26.53	10.86	30.06	11.21	1088.92	92.1	47.13
2019-01-09 20:00:00	6.78	35.77	8.44	30.48	9.17	23.49	10.01	30.25	11.19	1088.92	92.26	52.603
2019-01-09 20:15:00	7.07	40.6	9.04	38.46	10.14	34.06	10.86	38.48	11.38	1089.58	92.56	54.983
2019-01-09 20:30:00	7.49	36.78	9.49	34.72	10.52	30.95	11.32	38.02	11.33	1088.92	92.78	55.848
2019-01-09 20:45:00	7.89	38.1	10.18	26.61	11.41	31.42	12.63	36.92	11.32	1088.92	92.85	63.47
2019-01-09 21:00:00	7.98	37.51	9.78	34.22	10.82	28.27	11.54	33.55	11.4	1089.58	92.73	58.592
2019-01-09 21:15:00	7.08	34.61	8.86	13.25	9.87	27.41	10.92	32.47	11.44	1088.92	92.59	52.254
2019-01-09 21:30:00	7.35	30.05	9.06	8.01	9.99	21.62	11.21	26.62	11.54	1088.92	92.38	38.543
2019-01-09 21:45:00	6.64	33.76	8.22	24.52	9.53	28.58	10.6	33.74	11.63	1089.58	91.92	40.044
2019-01-09 22:00:00	6.33	32.61	7.91	7.98	8.59	26.19	9.48	30.48	11.67	1089.58	91.8	29.185
2019-01-09 22:15:00	6.15	29.13	7.16	21.6	7.38	17.41	7.81	23.26	11.72	1089.58	91.99	32.71
2019-01-09 22:30:00	5.8	29.54	6.57	25.63	7.13	21.07	8.84	26.45	11.59	1089.58	92.56	39.152
2019-01-09 22:45:00	6.53	25.95	7.45	21.04	7.96	18.68	8.97	24.47	11.57	1088.92	92.84	35.526
2019-01-09 23:00:00	6.53	25.95	7.45	21.04	7.96	18.68	8.97	24.47	11.57	1088.92	92.84	29.807
2019-01-09 23:15:00	6.53	25.95	7.45	21.04	7.96	18.68	8.97	24.47	11.57	1088.92	92.84	32.157
2019-01-09 23:30:00	6.53	25.95	7.45	21.04	7.96	18.68	8.97	24.47	11.57	1088.92	92.84	29.132
2019-01-09 23:45:00	6.53	25.95	7.45	21.04	7.96	18.68	8.97	24.47	11.57	1088.92	92.84	31.122
2019-01-10	6.53	25.95	7.45	21.04	7.96	18.68	8.97	24.47	11.57	1088.92	92.84	23.549
2019-01-10 00:15:00	6.53	25.95	7.45	21.04	7.96	18.68	8.97	24.47	11.57	1088.92	92.84	25.071
2019-01-10 00:30:00	6.53	25.95	7.45	21.04	7.96	18.68	8.97	24.47	11.57	1088.92	92.84	25.657
2019-01-10 00:45:00	6.53	25.95	7.45	21.04	7.96	18.68	8.97	24.47	11.57	1088.92	92.84	22.271
2019-01-10 01:00:00	5.24	29.9	6.12	24.28	6.49	20.13	7.45	24.04	12.65	1088.92	88.41	20.454
2019-01-10 01:15:00	4.72	34.79	5.84	7.71	6.39	24.67	7.15	26.98	12.69	1088.92	88.05	27.206
2019-01-10 01:30:00	4.89	29.79	5.9	4.95	6.44	20.4	7.06	27.35	12.85	1088.92	87.77	22.427
2019-01-10 01:45:00	5.43	32.49	6.12	27.7	6.76	22	7.69	26.78	12.89	1088.92	87.48	22.594
2019-01-10 02:00:00	4.2	35.26	5.53	26.45	6.21	26.78	7.28	29.19	12.95	1088.25	87.44	20.511
2019-01-10 02:15:00	4.85	31.58	5.78	24.67	6.27	22.64	7.68	27.6	12.92	1088.92	87.22	22.085
2019-01-10 02:30:00	4.36	28.85	5.08	26.39	5.72	20.46	7.01	26.83	12.98	1088.92	87.12	19.034
2019-01-10 02:45:00	4.62	31.7	5.68	26.11	6.06	21.6	7.06	25.82	13.03	1088.92	86.83	18.628
2019-01-10 03:00:00	3.8	28.53	4.67	23.29	5.2	17.83	6.46	23.82	13.09	1088.92	86.69	19.703
2019-01-10 03:15:00	5.33	23.72	6.14	19.06	6.46	13.41	7.44	18.97	13.27	1088.25	86.01	22.08
2019-01-10 03:30:00	4.54	24.98	5.25	16.56	5.78	11.93	7.09	19.92	13.36	1088.92	85.61	12.421
2019-01-10 03:45:00	4.54	27.4	5.28	20.86	5.53	13.71	6.12	20.66	13.42	1088.92	85.41	11.166
2019-01-10 04:00:00	4.51	29.71	5.63	25.25	6.39	20.9	7.16	25.8	13.54	1088.25	85.75	13.214
2019-01-10 04:15:00	4.42	32.8	5.22	29.19	6.06	22.85	6.98	29	13.75	1088.92	85.95	12.926
2019-01-10 04:30:00	4.7	39.97	6.36	36.86	7.35	29.88	8.25	33.31	13.75	1088.92	86.43	10.523
2019-01-10 04:45:00	4.32	34.43	5.53	29.07	5.99	21.65	6.4	27.13	13.87	1088.92	86.84	8.303
2019-01-10 05:00:00	3.35	30.88	4.56	22.62	5.35	17.6	6.59	19.79	13.87	1088.25	87.18	8.937
2019-01-10 05:15:00	3.5	26.95	4.63	21.07	4.96	14.5	5.56	20.24	14.04	1088.92	86.61	5.903
2019-01-10 05:30:00	3.46	34.91	4.59	30.38	5.56	25.39	6.49	26.52	14.04	1088.92	86.5	5.51
2019-01-10 05:45:00	2.84	37.75	3.81	34.61	4.19	24.8	5.09	29.88	13.99	1088.25	87.08	6.887
2019-01-10 06:00:00	3.48	26.43	4.54	21.96	5.19	17.03	6.23	23.86	14.07	1088.92	87.12	5.568
2019-01-10 06:15:00	2.76	31.99	3.83	29.95	4.23	25.51	5.33	30	13.88	1088.25	87.64	6.178
2019-01-10 06:30:00	4.35	23.88	4.99	20.18	5.57	17.19	6.65	24.55	13.85	1088.92	88.49	8.106
2019-01-10 06:45:00	2.76	44.1	3.97	39.72	4.09	33.99	4.91	36.86	13.9	1088.92	88.6	4.503
2019-01-10 07:00:00	3.1	35.36	4.26	35.58	4.99	33.5	5.99	38.01	13.9	1088.25	88.75	5.403
2019-01-10 07:15:00	2.51	28.78	3.82	29.31	4.66	28.15	5.9	32.58	14.04	1089.58	88.63	4.929
2019-01-10 07:30:00	3.19	30.01	3.89	24.48	4.59	21.01	5.91	27.78	14.13	1088.92	88.22	4.205
2019-01-10 07:45:00	3.64	29.93	4.28	24.3	4.76	16.97	5.54	20.59	14.34	1088.25	87.55	8.203
2019-01-10 08:00:00	3.36	36.61	4.48	35.55	5.03	26.73	5.98	32.82	14.48	1088.92	86.91	6.758
2019-01-10 08:15:00	3.75	41.92	4.88	37.7	5.73	31.35	6.32	33.05	14.46	1088.92	86.83	5.867
2019-01-10 08:30:00	3.49	39.82	4.66	40.75	5.79	33.67	6.56	34.5	14.65	1088.25	86.4	4.906
2019-01-10 08:45:00	2.88	55.51	4.56	46.79	5.14	39.09	5.53	41	14.72	1088.92	86.2	4.01
2019-01-10 09:00:00	2.75	49.52	3.74	46.56	4.12	43.09	4.89	45.32	14.64	1088.25	86.15	4.522
2019-01-10 09:15:00	3.17	47.83	4.35	42.47	4.95	35.66	5.45	36.57	14.68	1088.25	85.64	5.767
2019-01-10 09:30:00	3.42	44.24	4.7	43.18	5.45	36.91	5.92	38.31	14.74	1088.25	84.92	7.535
2019-01-10 09:45:00	3.43	47.4	4.88	46.08	5.35	40.28	5.23	41.84	14.86	1088.25	84.24	9.377
2019-01-10 10:00:00	3.68	40.4	5.05	39.71	5.9	33.75	6.79	38.36	15.02	1088.92	83.63	14.949
2019-01-10 10:15:00	3.91	45.47	5.38	42.81	5.92	37.11	6.63	41.14	15.06	1088.25	82.81	15.853
2019-01-10 10:30:00	3.88	51.36	5.46	45.97	5.68	37.32	6.08	38.76	15.01	1088.25	82.65	15.382
2019-01-10 10:45:00	3.87	39.89	5.31	41.92	6.08	37.72	6.82	41.65	14.94	1088.92	82.95	17.772
2019-01-10 11:00:00	4.33	42.97	5.88	40.6	6.46	35.16	6.77	39.5	14.89	1088.92	83.38	18.995
2019-01-10 11:15:00	4.4	44.52	6.03	42.54	6.61	36.55	6.76	40.04	14.78	1088.92	84.2	18.561
2019-01-10 11:30:00	4.4	50.43	5.9	43.82	6.42	37.28	6.65	40.43	14.73	1088.25	85.17	16.106
2019-01-10 11:45:00	4.24	45.38	5.9	42.54	6.48	37.62	6.72	41.73	14.75	1088.25	85.88	15.604
2019-01-10 12:00:00	4.09	44.11	5.28	24.3	5.77	36.84	6.29	43.24	14.99	1088.25	85.44	14.633
2019-01-10 12:15:00	3.91	46.06	5.13	19.5	5.64	36.33	6.27	42.74	14.84	1088.25	86.08	15.329
2019-01-10 12:30:00	3.4	74.41	4.11	52.8	4.4	53.63	4.43	56.39	14.54	1088.25	86.7	15.749
2019-01-10 12:45:00	2.78	60.96	3.64	16.29	4.51	48.67	5.36	54.51	14.48	1088.92	87.25	15.741
2019-01-10 13:00:00	3.36	59.71	4.73	15.68	4.96	41.78	5.2	44.78	14.65	1088.25	87.3	17.532
2019-01-10 13:15:00	3.48	65.66	4.71	54.79	5.08	45.91	5.48	50.13	14.46	1088.25	87.24	19.536
2019-01-10 13:30:00	3.49	61.95	4.52	0.72	5.06	45.02	5.57	49.29	14.53	1088.25	87.75	14.281
2019-01-10 13:45:00	3.76	52.35	5.12	4.98	5.65	45.34	5.96	49.18	14.45	1088.25	87.58	12.71
2019-01-10 14:00:00	3.67	48.52	5.02	2.34	5.56	41.77	6.14	46.24	14.59	1088.25	86.71	12.256
2019-01-10 14:15:00	3.63	55.65	4.88	0.22	5.56	42.6	5.87	46.09	14.48	1088.25	86.21	9.37
2019-01-10 14:30:00	3.55	50.42	4.8	13.35	5.29	41.67	5.6	49.93	14.42	1088.25	87.17	11.149
2019-01-10 14:45:00	4.23	60.82	6.05	53.07	6.31	46.2	6.19	50.39	14.33	1088.92	87.89	14.252
2019-01-10 15:00:00	4.98	60.88	6.63	0.38	7.02	46.07	7.06	48.72	14.23	1088.25	88.49	13.36
2019-01-10 15:15:00	4.58	54.42	6.72	1.85	7.28	44.17	7.23	47.12	14.23	1087.58	89.1	16.324
2019-01-10 15:30:00	4.57	54.45	6	25.73	6.39	43.02	7.43	46.94	14.22	1088.25	89.64	16.053
2019-01-10 15:45:00	4.36	55.14	6.07	41.02	6.79	43.16	7.43	47.44	14.31	1088.25	90.22	15.194
2019-01-10 16:00:00	4.8	67.84	6.92	49.67	7.73	48.81	7.98	52.42	14.07	1088.92	90.7	17.086
2019-01-10 16:15:00	4.33	60.14	6.37	35.58	6.87	45.82	7.37	49.33	14.01	1088.25	91.42	16.692
2019-01-10 16:30:00	5.81	50.55	7.59	27.23	8.36	43.09	8.58	47.38	14.11	1088.25	91.96	18.263
2019-01-10 16:45:00	5.07	44.17	6.74	42.41	7.55	39.99	7.86	46.17	13.91	1088.25	92.23	20.199
2019-01-10 17:00:00	4.15	58.36	6.2	46.96	6.95	44.73	7.34	48.77	13.69	1088.92	92.51	26.413
2019-01-10 17:15:00	4.78	52.57	6.71	45.41	7.46	44.14	7.98	47.67	13.69	1088.25	92.95	30.402
2019-01-10 17:30:00	5.27	49.25	7.72	43.53	8.2	42.75	8.55	48.4	13.56	1088.92	93.17	30.762
2019-01-10 17:45:00	5.06	50.08	6.13	37.56	6.59	40.42	6.79	44.9	13.55	1088.92	93.52	28.106
2019-01-10 18:00:00	3.98	44.96	5.22	19.21	5.65	38.13	6.28	44.47	13.5	1088.92	93.62	27.238
2019-01-10 18:15:00	4.61	40.57	5.65	38.16	6.62	34.37	7.38	40.09	13.53	1088.92	93.79	25.861
2019-01-10 18:30:00	5.24	40.13	6.38	37.34	7.01	32.38	7.6	36.88	13.39	1088.92	93.76	21.652
2019-01-10 18:45:00	5	42.29	6.18	41.08	7.1	36.74	7.74	42.95	13.41	1088.25	93.79	19.351
2019-01-10 19:00:00	4.89	47.44	6.79	48.83	7.15	42.62	7.38	46.08	13.42	1088.92	93.79	18.143
2019-01-10 19:15:00	5.07	40.65	6.29	39.12	7.36	33.86	8.43	40.65	13.48	1088.92	93.6	17.556
2019-01-10 19:30:00	3.82	39.5	4.71	36.27	5.68	33.98	6.74	41.14	13.65	1088.92	93.42	17.776
2019-01-10 19:45:00	5.25	41.88	6.56	36.56	7.69	33.35	8.52	40.08	13.66	1089.58	93.22	23.215
2019-01-10 20:00:00	5.32	38.54	6.96	38.1	7.8	32.71	8.99	38.37	13.63	1088.92	93.11	25.208
2019-01-10 20:15:00	5.09	40.48	6.8	38.49	7.58	32.85	8.27	36.46	13.48	1088.92	93	25.118
2019-01-10 20:30:00	4.98	34.54	6.32	32.48	7.26	28.58	7.98	35.91	13.47	1088.92	92.86	23.002
2019-01-10 20:45:00	4.95	37.61	6.17	33.49	7.01	29.58	7.95	36.61	13.52	1089.58	93	23.946
2019-01-10 21:00:00	5.05	37.75	6.16	35.75	7.22	31.88	8.16	35.96	13.53	1088.92	93.22	19.881
2019-01-10 21:15:00	4.51	37.89	5.45	34.93	6.33	30.35	7.24	34.84	13.44	1088.92	93.43	21.423
2019-01-10 21:30:00	4.24	35.28	5	34.24	5.84	27.5	7.04	34.28	13.47	1088.92	93.65	23.759
2019-01-10 21:45:00	4.32	39.51	5.61	39.03	6.42	35.19	7.43	37.49	13.38	1088.92	93.77	27.159
2019-01-10 22:00:00	4.83	38.4	6.11	38.29	6.92	33.51	7.85	39.12	13.36	1088.92	93.82	22.128
2019-01-10 22:15:00	4.04	36.28	5.31	36.97	5.96	33.93	6.62	39.93	13.49	1088.92	93.8	16.884
2019-01-10 22:30:00	3.02	34.25	3.89	35.6	4.42	32.96	5.22	38.26	13.57	1089.58	93.76	11.605
2019-01-10 22:45:00	3.65	32.03	3.95	32.58	4.51	27.67	5.51	34.36	13.62	1088.92	93.72	14.464
2019-01-10 23:00:00	4.24	36.98	5.39	37.08	6.16	32.77	7.03	38.85	13.58	1088.92	93.74	16.828
2019-01-10 23:15:00	5.38	39.16	6.68	36.72	7.69	33.09	8.3	39.02	13.58	1088.92	93.9	16.112
2019-01-10 23:30:00	4.46	40.71	5.72	37.23	6.7	32.96	7.72	39.04	13.47	1088.92	93.93	14.656
2019-01-10 23:45:00	5.53	37.73	6.87	36.86	8.01	33.88	8.75	40.48	13.46	1088.92	94.07	20.16
2019-01-11	4.4	37.25	5.42	37.44	6.31	34.3	7.13	40.97	13.49	1088.92	94.18	20.281
2019-01-11 00:15:00	4.66	41.7	6.04	0.45	6.65	33.75	7.36	39.09	13.43	1088.92	94.27	20.251
2019-01-11 00:30:00	3.65	51.46	5.15	46.92	5.65	41.56	5.92	44.9	13.26	1088.92	94.35	19.195
2019-01-11 00:45:00	3.85	45.43	4.52	39.82	4.91	33.93	5.84	39.75	13.39	1088.92	94.42	23.228
2019-01-11 01:00:00	4.11	52.43	5.18	50.18	5.6	42.53	6.18	46.98	13.26	1088.92	94.34	25.374
2019-01-11 01:15:00	4.42	45.41	5.88	43.14	6.48	39.21	6.93	43.21	13.24	1088.92	94.31	19.708
2019-01-11 01:30:00	4.25	42.36	5.09	39.17	5.47	33.15	5.91	38.07	13.29	1088.92	94.44	18.883
2019-01-11 01:45:00	3.93	48.84	5.04	0.34	5.32	36.77	5.76	42.8	13.22	1088.92	94.37	17.981
2019-01-11 02:00:00	3.32	28.09	3.85	0.65	3.86	21.04	4.38	31.04	13.23	1088.92	94.47	12.375
2019-01-11 02:15:00	3.47	49.55	4.78	0.28	5.36	42.97	5.79	47.31	13.11	1088.92	94.45	14.068
2019-01-11 02:30:00	4.48	48.93	6.3	0.25	6.8	40.73	7.12	45.47	13.07	1088.92	94.56	15.854
2019-01-11 02:45:00	4.41	50.29	5.12	0.13	5.16	39.93	4.94	41.93	13.09	1088.92	94.63	16.306
2019-01-11 03:00:00	4.46	49.36	5.81	0.15	6.21	42.24	6.27	45.93	13.05	1088.25	94.72	15.621
2019-01-11 03:15:00	3.69	47.02	4.44	41.93	4.72	36.87	4.91	42.1	13.02	1088.25	94.79	16.98
2019-01-11 03:30:00	4.39	48.53	5.69	48.15	6.09	43.94	6.55	49.81	13.13	1088.25	94.85	17.601
2019-01-11 03:45:00	3.72	40.75	4.56	39.59	4.92	36.01	5.33	41.49	13.16	1088.25	94.82	11.207
2019-01-11 04:00:00	3.54	24.46	3.8	22.38	4	19.1	4.66	27.21	13.24	1088.92	94.9	12.763
2019-01-11 04:15:00	3.33	42.34	4.25	20.26	4.66	35.13	5.41	41.78	13.17	1088.92	94.94	14.462
2019-01-11 04:30:00	3.23	51.32	4.71	20.24	4.98	45.01	5.37	46.89	13.23	1088.25	94.93	13.591
2019-01-11 04:45:00	3.65	61.42	5.01	54.99	5.39	48.82	5.51	52.77	13.12	1088.25	94.91	11.336
2019-01-11 05:00:00	4.15	47.37	5.63	45.51	5.75	39.6	5.99	43.4	13.18	1088.92	94.97	13.84
2019-01-11 05:15:00	4.16	52.23	4.95	48.58	4.99	41.13	4.96	43.76	13.23	1088.25	94.99	14.065
2019-01-11 05:30:00	4.33	48.56	5.17	8.32	5.3	38.9	5.48	43.35	13.23	1088.92	94.97	12.811
2019-01-11 05:45:00	3.24	34.93	4.23	0.47	4.61	35.16	5.08	40.5	13.23	1088.25	94.99	10.277
2019-01-11 06:00:00	3.06	48.46	4.37	0.17	4.58	39.63	5.15	41.93	13.26	1088.92	94.89	10.376
2019-01-11 06:15:00	3.68	36.04	4.72	0.28	5.58	30.33	6.3	37.16	13.33	1088.92	94.83	8.383
2019-01-11 06:30:00	3.88	42.45	4.88	0.37	5.83	35.74	6.54	42.44	13.39	1088.92	94.74	10.006
2019-01-11 06:45:00	2.75	41.17	3.55	40.65	3.8	38.36	4.22	44.54	13.41	1088.25	94.62	7.224
2019-01-11 07:00:00	2.43	58.81	3.52	51.95	3.68	47.14	3.82	51.97	13.37	1088.25	94.47	5.583
2019-01-11 07:15:00	3.32	62.53	5.04	13.96	5.4	47.46	5.29	50.28	13.3	1088.25	94.48	6.844
2019-01-11 07:30:00	3.03	36.3	3.54	34.16	4.15	31.24	4.93	39.28	13.4	1088.92	94.45	5.226
2019-01-11 07:45:00	1.96	24.45	2.4	19.72	2.44	20.22	3.2	31.23	13.52	1088.92	94.37	1.987
2019-01-11 08:00:00	2.29	44.19	3.33	40.92	3.64	33.3	4.45	41.38	13.63	1088.92	94.24	4.644
2019-01-11 08:15:00	1.81	43.64	2.56	1.68	2.41	33.29	2.35	31.63	13.57	1088.92	94.08	5.039
2019-01-11 08:30:00	3.79	26.05	4.38	11.41	4.86	20.94	5.59	31.15	13.55	1088.92	93.93	4.531
2019-01-11 08:45:00	4	26.06	4.29	18.37	4.65	21.56	5.36	29.61	13.58	1088.92	93.81	4.654
2019-01-11 09:00:00	3.15	37.45	3.78	3.17	4.29	29.25	4.45	34.31	13.7	1088.92	93.77	3.984
2019-01-11 09:15:00	3.1	30.9	3.55	0.38	4.09	28.19	4.6	34.12	13.76	1088.92	93.78	5.076
2019-01-11 09:30:00	2.45	44.96	3.49	20.37	3.71	40.02	4.18	47.29	13.79	1089.58	93.76	4.918
2019-01-11 09:45:00	2.05	62.47	3.18	52.43	3.02	43.35	3.15	44.81	13.72	1089.58	93.78	4.004
2019-01-11 10:00:00	1.7	51.74	2.75	51.25	2.8	44.13	3.02	46.93	13.77	1088.25	93.92	2.213
2019-01-11 10:15:00	2.7	43.23	3.61	49.15	3.3	39.25	3.21	41.33	13.61	1088.92	93.91	3.778
2019-01-11 10:30:00	2.57	43.86	3.21	40.16	3.17	30.17	3.62	27.14	13.83	1088.92	94.07	4.568
2019-01-11 10:45:00	2.41	42.12	3.23	46.65	3.19	36.98	3.42	33.65	13.89	1088.92	94.09	5.773
2019-01-11 11:00:00	2.24	76.66	2.75	66.27	2.37	57.31	2.48	57.32	13.71	1088.92	94.12	5.814
2019-01-11 11:15:00	1.82	54.57	3.14	49.93	2.98	45.27	2.82	44.72	13.7	1088.92	94.07	4.764
2019-01-11 11:30:00	2.54	63.3	3.35	23.13	3.19	49.28	3.53	52.37	13.76	1088.25	94.06	4.69
2019-01-11 11:45:00	1.52	58.02	3.04	46.36	2.93	49.03	2.95	51.01	13.79	1088.92	94.02	2.468
2019-01-11 12:00:00	1.56	59.27	2.77	30.46	2.66	38.67	2.7	41.78	14.03	1088.92	93.91	1.356
2019-01-11 12:15:00	1.92	55.49	2.71	14.89	2.69	40.79	2.68	45.1	14.33	1088.25	93.65	0.96
2019-01-11 12:30:00	1.72	53.54	2.59	48.97	2.43	45.69	2.25	46.77	14.41	1088.25	93.19	0.102
2019-01-11 12:45:00	1.88	51.21	2.79	41.03	2.8	37.92	2.45	32.05	14.38	1088.25	92.6	0.022
2019-01-11 13:00:00	1.26	49.3	2.35	37.6	2.27	33.17	2.22	21.57	14.4	1088.25	92.3	-0.219
2019-01-11 13:15:00	1.64	73.1	2.14	39.78	2.3	39.77	2.66	30.38	14.5	1088.25	91.97	0.064
2019-01-11 13:30:00	2.14	80.42	2.01	57.41	2.06	57.34	2.57	47.3	14.27	1088.92	91.74	0.663
2019-01-11 13:45:00	1.67	65.08	2.37	50.33	2.55	48.2	2.53	59.04	14.38	1088.25	91.57	1.221
2019-01-11 14:00:00	2.04	52.04	3.08	38.44	3.27	39.8	3.04	51.09	14.64	1088.92	91.47	0.727
2019-01-11 14:15:00	2.15	40.6	2.86	34.97	3.18	36.03	2.93	46.96	14.73	1088.25	90.83	0.954
2019-01-11 14:30:00	2.33	74.87	2.73	48.52	2.83	49.61	2.81	53.85	14.42	1088.25	90.61	0.611
2019-01-11 14:45:00	1.63	68.1	2.22	3.7	2.11	63.51	2.33	71.89	14.47	1088.25	90.86	0.323
2019-01-11 15:00:00	1.45	69.6	2.01	51.83	2.09	68.48	2.41	72.48	14.48	1088.92	90.96	0.638
2019-01-11 15:15:00	1.43	89.44	2.19	91.85	2.92	81.48	3.56	82.46	14.51	1088.25	90.94	0.609
2019-01-11 15:30:00	1.75	87.97	2.36	37.66	2.96	81.33	3.74	87.99	14.38	1088.25	91.22	0.074
2019-01-11 15:45:00	2.04	85.53	2.63	47.99	3.49	82.31	2.77	84.4	14.32	1088.25	91.39	0.194
2019-01-11 16:00:00	2.19	89.91	3.94	82.69	3.89	89.17	3.96	88.66	14.34	1088.25	91.68	0.589
2019-01-11 16:15:00	2.15	77.84	3.19	73.48	3.55	73.23	3.38	79.95	14.4	1088.25	92.07	0.458
2019-01-11 16:30:00	2.15	77.84	3.19	73.48	3.55	73.23	3.38	79.95	14.4	1088.25	92.07	0.498
2019-01-11 16:45:00	2.15	77.84	3.19	73.48	3.55	73.23	3.38	79.95	14.4	1088.25	92.07	-0.355
2019-01-11 17:00:00	2.15	77.84	3.19	73.48	3.55	73.23	3.38	79.95	14.4	1088.25	92.07	-0.428
2019-01-11 17:15:00	2.15	77.84	3.19	73.48	3.55	73.23	3.38	79.95	14.4	1088.25	92.07	-0.389
2019-01-11 17:30:00	0.23	55.64	1.3	21.91	0.92	32.81	2.02	51.8	14.25	1087.58	92.23	-0.489
2019-01-11 17:45:00	0.26	71.58	1.53	65.49	1.82	68.49	3.09	79.93	14.28	1088.25	92.27	-0.542
2019-01-11 18:00:00	0.84	55.14	1.8	55.44	1.99	53.88	3.27	66.13	14.27	1088.92	92.34	-0.391
2019-01-11 18:15:00	1.1	81.61	1.91	72.58	2.24	67	3.35	78.43	14.14	1088.25	92.56	-0.364
2019-01-11 18:30:00	1.78	66.25	2.89	61.25	2.76	68.85	3.23	87.33	14.18	1088.25	92.75	-0.44
2019-01-11 18:45:00	2.29	32.86	2.96	32.78	3.31	29.84	3.38	46.66	14.23	1088.25	92.88	1.603
2019-01-11 19:00:00	1.51	44.13	2.59	45.36	2.59	45.21	3.23	55.66	14.14	1088.25	92.79	2.377
2019-01-11 19:15:00	1.71	31.37	2.41	32.84	2.6	27.37	3.04	30.79	14.16	1088.92	92.89	4.302
2019-01-11 19:30:00	1.97	42.43	2.74	37.53	3	29.32	3.49	35.55	14.05	1088.92	93.18	4.215
2019-01-11 19:45:00	1.08	73.24	2.27	58.23	2.54	57.33	3.27	67.22	13.99	1088.25	93.39	3.441
2019-01-11 20:00:00	2.48	45.34	3.54	47.47	3.7	44.02	3.94	49.46	13.99	1088.92	93.78	2.451
2019-01-11 20:15:00	1.35	49.78	1.92	47.31	2.04	44.99	2.66	52	13.92	1088.92	94.02	1.931
2019-01-11 20:30:00	1.29	71.18	2.12	61.1	2.47	54.68	3.38	61.68	13.96	1088.92	94.28	1.56
2019-01-11 20:45:00	1.22	63.49	2.35	56.87	2.88	49.96	3.12	55.66	13.89	1088.25	94.45	0.731
2019-01-11 21:00:00	1.13	67.74	1.66	58	1.91	50.75	2.37	59.71	13.82	1088.25	94.6	0.979
2019-01-11 21:15:00	1.26	48.08	1.86	43.69	1.82	39.97	2.28	44.28	13.84	1088.25	94.67	1.56
2019-01-11 21:30:00	0.65	33.68	1.19	33.78	1.27	23.48	1.87	22.37	13.8	1088.25	94.84	1.551
2019-01-11 21:45:00	1.39	56.31	2.23	44.39	2.39	39.14	2.58	45.26	13.64	1088.92	94.99	1.255
2019-01-11 22:00:00	0.6	57.06	1.49	58.61	1.13	52.93	1.76	65.63	13.66	1088.25	95.1	0.989
2019-01-11 22:15:00	2.14	22.37	2.27	18.73	2.07	16.4	2.27	27.36	13.62	1088.25	95.26	1.493
2019-01-11 22:30:00	1.19	31.93	1.73	26.84	1.99	20.51	2.45	28.2	13.65	1088.25	95.34	2.583
2019-01-11 22:45:00	0.41	51.99	0.7	47.6	0.26	37.1	1.25	47.09	13.69	1088.92	95.42	2.818
2019-01-11 23:00:00	2.27	20.82	2.44	20.68	2.67	15.16	3.3	22.14	13.61	1088.25	95.53	3.36
2019-01-11 23:15:00	2.3	23.79	2.66	21.94	2.71	17.32	3.29	23.28	13.6	1088.92	95.62	3.5
2019-01-11 23:30:00	1.76	35.38	2.12	35.82	2.14	29.86	2.74	36.6	13.61	1088.92	95.73	3.323
2019-01-11 23:45:00	1.36	62.28	2.08	50.93	2.06	43.73	2.64	48.25	13.49	1088.92	95.78	1.896
2019-01-12	2.22	85.75	2.59	78.02	2.38	72.47	2.7	77.9	13.51	1088.92	95.9	0.753
2019-01-12 00:15:00	0.7	101.85	1.43	94.56	1.33	84.81	2.16	89.31	13.51	1088.92	95.88	-0.113
2019-01-12 00:30:00	0.01	57.02	0	47.35	0	71.77	0.89	68.01	13.53	1088.92	95.87	1.463
2019-01-12 00:45:00	1.66	24.06	1.73	15.93	1.91	14.37	2.41	22.76	13.52	1088.92	96.05	1.887
2019-01-12 01:00:00	1.11	49.5	2.16	44.43	2.45	37.97	3.06	44.37	13.46	1088.25	96	2.086
2019-01-12 01:15:00	1.35	45.21	2.26	41.83	2.07	36.11	2.21	37.81	13.51	1088.92	96.11	1.833
2019-01-12 01:30:00	1.73	19.61	2.25	16.73	2.47	13.38	3.26	24.03	13.47	1088.92	96.17	1.392
2019-01-12 01:45:00	1.34	39.33	1.78	35.62	2.01	32.69	2.53	37.05	13.43	1089.58	96.23	2.249
2019-01-12 02:00:00	0.88	43.64	1.75	45.97	1.92	43.64	2.49	51.1	13.53	1088.92	96.31	2.69
2019-01-12 02:15:00	1.41	79.05	1.82	65.27	1.49	56.96	1.81	60.49	13.49	1088.92	96.34	0.355
2019-01-12 02:30:00	1	82.35	1.81	72.2	1.68	67.81	1.95	73.05	13.42	1088.92	96.35	-0.507
2019-01-12 02:45:00	0.39	66.1	0.97	60.54	0.81	61.13	1.71	59.6	13.53	1088.92	96.46	-0.784
2019-01-12 03:00:00	0.73	10.27	1.19	5.96	1.14	6.49	1.91	17.17	13.5	1088.25	96.44	-0.215
2019-01-12 03:15:00	1.03	46.06	1.85	43.69	1.56	39.32	2	43.97	13.49	1088.92	96.44	0.225
2019-01-12 03:30:00	0.82	46.9	2.32	47.56	2.39	43.74	2.57	52.39	13.56	1088.92	96.56	-0.283
2019-01-12 03:45:00	0.48	39.7	1	38.87	0.85	29.92	1.59	34.01	13.53	1088.92	96.56	-0.117
2019-01-12 04:00:00	0.09	30.32	0.4	10.63	0.04	20	1.47	19.79	13.55	1088.92	96.57	0.206
2019-01-12 04:15:00	1.15	44.47	1.94	5.09	1.8	39.06	2.25	38.86	13.53	1088.92	96.59	0.282
2019-01-12 04:30:00	0.44	56.85	1.7	21.23	1.57	55.47	2.43	61.4	13.57	1088.92	96.67	1.704
2019-01-12 04:45:00	2.41	86.65	2.92	71.13	2.87	70.9	3.23	71	13.54	1088.92	96.72	3.399
2019-01-12 05:00:00	1.81	28.93	2.68	25.95	2.69	20.06	3.31	24.61	13.5	1088.25	96.73	5.058
2019-01-12 05:15:00	2.7	32.94	3.63	29.22	4.02	24.29	4.49	30.11	13.54	1088.92	96.79	7.581
2019-01-12 05:30:00	3.78	43.96	4.65	41.52	5.06	36.41	5.45	41.42	13.54	1088.92	96.8	10.777
2019-01-12 05:45:00	3.82	45.81	5.02	30.77	5.4	41.53	5.77	46.5	13.56	1088.92	96.83	9.527
2019-01-12 06:00:00	3.12	68.43	4.82	57.95	4.77	53.95	4.95	60.49	13.58	1088.92	96.85	12.126
2019-01-12 06:15:00	3.91	42.46	5.02	39.88	5.27	35.01	5.83	41.05	13.66	1088.92	96.89	17.685
2019-01-12 06:30:00	3.68	39.79	4.84	39.21	5.24	34.88	5.69	40.3	13.66	1088.92	96.95	19.631
2019-01-12 06:45:00	3.76	43.72	4.92	9.05	5.29	37.69	5.57	45.01	13.69	1088.25	96.96	20.552
2019-01-12 07:00:00	3.18	47.71	4.3	3.02	4.48	40.59	4.95	44.7	13.73	1089.58	97.05	17.9
2019-01-12 07:15:00	3.46	49.4	4.46	1.5	4.95	39.59	5.64	45.2	13.78	1088.92	97.04	18.421
2019-01-12 07:30:00	2.81	57.9	4.3	50.69	4.46	46.22	4.73	51.73	13.8	1088.92	97.1	18.642
2019-01-12 07:45:00	2.84	65.9	4.51	57.29	4.82	52.47	5.27	58.87	13.81	1088.92	97.1	13.209
2019-01-12 08:00:00	2.54	65.1	4.07	56.82	4.41	50.32	4.85	54.3	13.8	1088.92	97.1	10.561
2019-01-12 08:15:00	3.23	58.05	4.87	51.89	5.14	46.88	5.42	52.68	13.81	1088.92	97.17	11.002
2019-01-12 08:30:00	3.22	55.02	5.14	27.3	5.35	45.04	5.58	51.04	13.84	1088.92	97.13	6.79
2019-01-12 08:45:00	3.13	40.51	3.98	3.42	4.57	33.82	5.45	39.68	13.91	1088.92	97.19	8.119
2019-01-12 09:00:00	3.18	37.94	4.13	27.23	4.95	32.19	5.81	38.16	13.88	1088.92	97.2	9.96
2019-01-12 09:15:00	4.41	42.61	5.44	38.69	5.87	36.18	5.84	43.35	13.97	1088.92	97.21	9.931
2019-01-12 09:30:00	3.22	48.01	5.15	48.44	5.29	47.2	5.31	53.3	14.21	1088.92	97.18	11.186
2019-01-12 09:45:00	3.55	59.37	5.12	50.2	5.41	45.23	5.39	51.67	14.18	1088.25	97.21	13.7
2019-01-12 10:00:00	3.62	47.45	5	47.02	5.23	42.11	5.35	45.66	14.06	1088.92	97.16	11.156
2019-01-12 10:15:00	3.89	39.62	5.06	40.41	5.51	36.17	5.86	41.35	14.15	1088.92	97.15	9.506
2019-01-12 10:30:00	4.51	40.15	5.72	36.12	6.21	34.83	6.55	38.65	14.26	1088.92	97.19	10.981
2019-01-12 10:45:00	3.67	38.72	4.46	2.67	4.99	28.4	5.6	33.81	14.25	1088.92	97.1	14.512
2019-01-12 11:00:00	4.99	32.6	6.39	0.53	7.32	25.4	8.11	27.74	14.24	1088.25	97.08	19.153
2019-01-12 11:15:00	4.85	31.02	6.53	2.36	7.22	26.42	7.7	33.2	14.34	1088.92	96.99	22.835
2019-01-12 11:30:00	5.47	39.36	6.7	19.28	7.33	30.44	7.9	35.82	14.1	1088.92	96.78	27.186
2019-01-12 11:45:00	6.57	35.66	8.07	33.73	9.14	29.42	9.84	35.08	13.85	1088.92	96.68	36.938
2019-01-12 12:00:00	7.28	42.92	9.01	40.61	9.72	36	10.49	39.96	13.47	1088.25	96.47	34.973
2019-01-12 12:15:00	6.32	44.75	8.46	42.84	9.43	37.97	9.99	43.74	13.4	1088.92	96.19	36.208
2019-01-12 12:30:00	6.02	37.9	7.82	37.52	8.85	35.38	9.34	41.79	13.41	1088.92	96.01	36.301
2019-01-12 12:45:00	5.67	42.39	7.3	39.96	8	34.06	8.79	39.61	13.33	1088.92	95.93	34.392
2019-01-12 13:00:00	6.36	36.45	7.58	34.96	8.48	32.9	9.41	40.4	13.19	1088.92	95.94	36.903
2019-01-12 13:15:00	6.49	36.06	8.35	33.48	9.18	29.77	9.87	34.98	13.21	1088.92	95.94	37.792
2019-01-12 13:30:00	6.26	38.06	7.71	35.86	8.57	31.37	9.46	37.42	13.2	1088.25	95.9	33.945
2019-01-12 13:45:00	6.38	35.94	8.07	31.27	9.17	26.8	9.96	33	13.22	1088.92	95.87	36.721
2019-01-12 14:00:00	6.31	37.23	7.93	35.43	8.58	31.69	9.51	37.9	13.18	1088.25	95.82	42.164
2019-01-12 14:15:00	6.35	37.22	8.35	34.03	9.49	28.97	10.02	34.27	13.14	1088.92	95.69	45.748
2019-01-12 14:30:00	6.63	43.5	8.28	38.71	8.96	32.4	10	39.05	13.1	1088.92	95.5	50.814
2019-01-12 14:45:00	7.13	42.92	8.75	36.71	9.52	31.96	10.33	38.73	13.21	1088.92	95.26	55.295
2019-01-12 15:00:00	7.46	45.59	9.54	41.2	10.38	36.74	11.08	41.13	13.11	1088.25	94.96	53.963
2019-01-12 15:15:00	7.62	43.18	9.74	40.12	10.75	36.51	11.61	41.72	13.16	1088.92	94.9	56.616
2019-01-12 15:30:00	6.63	42.41	8.53	37.03	9.47	32.41	10.3	38.24	13.05	1088.25	94.67	56.767
2019-01-12 15:45:00	6.73	39.32	8.61	35.59	9.86	30.09	10.62	36.77	13.12	1088.92	94.01	53.98
2019-01-12 16:00:00	6.08	41.86	8.1	37.27	8.79	31.78	9.57	36.13	13.21	1088.92	93.12	48.718
2019-01-12 16:15:00	6.27	37.63	8.26	33.44	9.01	29.59	9.67	35.5	13.3	1088.92	91.46	46.226
2019-01-12 16:30:00	6.26	41.71	7.99	40.33	8.56	35.19	9.19	38.6	13.44	1089.58	89.37	45.878
2019-01-12 16:45:00	6.4	37.52	7.77	34.91	8.84	31.24	9.68	37.39	13.4	1088.92	87.7	49.573
2019-01-12 17:00:00	6.66	35.33	8.2	33.14	9.19	28.78	10.17	34.89	13.42	1088.92	87.63	47.422
2019-01-12 17:15:00	6.88	32.48	8.63	32.11	9.54	27.85	10.44	32.92	13.3	1088.92	88.08	43.655
2019-01-12 17:30:00	6.29	43.4	8.1	39.69	9.27	36.24	10.1	40.5	13.44	1088.92	86.88	43.443
2019-01-12 17:45:00	6.41	42.33	8.16	41.7	9.13	36.35	10.2	40.79	13.45	1089.58	85.97	41.654
2019-01-12 18:00:00	5.99	38.15	7.57	33.09	8.56	28.15	9.3	36.24	13.48	1089.58	86.22	36.682
2019-01-12 18:15:00	5.84	34.06	7.19	31.79	8.29	27.92	9.62	32.31	13.58	1088.92	86.03	37.287
2019-01-12 18:30:00	6.11	31.91	7.67	29.24	8.87	25.39	9.92	30.16	13.44	1088.92	86.62	36.211
2019-01-12 18:45:00	6.71	31.2	8.6	27.95	9.3	23.89	10.15	30.89	13.42	1089.58	86.22	33.799
2019-01-12 19:00:00	6.5	39.86	8.1	33.36	8.75	27.72	9.52	32.36	13.43	1088.92	86.26	38.432
2019-01-12 19:15:00	5.9	38.08	7.89	35.73	9.12	29.72	9.81	35.8	13.35	1088.92	85.94	33.953
2019-01-12 19:30:00	5.72	36.88	7.14	34.61	8.09	29.45	8.73	36.79	13.43	1089.58	85.82	31.252
2019-01-12 19:45:00	5.45	34.06	7.03	31.36	8.22	27.33	9.18	33.71	13.46	1088.92	85.67	28.764
2019-01-12 20:00:00	5.62	32.47	7.13	28.33	8.09	25.36	9.27	31.51	13.33	1088.92	85.94	32.533
2019-01-12 20:15:00	5.93	35.79	7.29	31.7	8.22	27.24	9.29	33.81	13.33	1088.92	85.92	33.113
2019-01-12 20:30:00	6.69	34.88	8.72	32.69	9.95	27.49	10.64	32.54	13.28	1088.92	85.62	34.868
2019-01-12 20:45:00	5.44	32.86	6.86	27.21	7.98	27	9.2	31.2	13.24	1088.92	85.53	33.973
2019-01-12 21:00:00	5.89	31.31	7.24	29.33	8.66	25.35	10.11	30.49	13.29	1088.92	84.83	39.424
2019-01-12 21:15:00	6.4	31.22	8.12	30.03	9.38	23.26	10.57	29.93	13.26	1088.25	84.66	45.03
2019-01-12 21:30:00	5.8	32.44	7.21	29.23	8.16	25.91	9.53	31.72	13.26	1088.25	84.85	50.541
2019-01-12 21:45:00	6.42	33.49	8.25	30.92	9.51	25.48	10.8	30.54	13.24	1088.92	85.13	55.108
2019-01-12 22:00:00	6.09	36.49	8.44	32.03	9.97	26.03	11.08	31.77	13.27	1088.92	85.32	61.524
2019-01-12 22:15:00	7.98	31.46	9.78	27.56	11.2	23.21	12.09	27.64	12.99	1088.92	87.79	64.664
2019-01-12 22:30:00	8.02	28.39	9.67	26.99	10.92	22.69	12.33	26.15	12.74	1088.92	90.16	66.024
2019-01-12 22:45:00	7.5	32.85	9.07	27.1	9.95	21.61	11.51	26.06	12.57	1088.92	91.34	68.985
2019-01-12 23:00:00	7.15	32.17	9.13	28.12	10.59	22.68	11.99	28.41	12.62	1088.92	90.61	65.728
2019-01-12 23:15:00	6.8	34.53	9.16	29.59	10.71	25.86	11.58	28.73	12.33	1088.25	91.52	59.519
2019-01-12 23:30:00	6.51	30.33	8	28.39	9.02	24.07	10.17	30.52	12.26	1088.92	91.71	54.993
2019-01-12 23:45:00	7.36	30.73	9	27.65	9.9	23.77	11.02	29.08	12.31	1089.58	92.05	54.283
2019-01-13	5.74	30.49	7.24	28.99	8.44	23.12	9.6	30.93	12.24	1088.92	92.29	53.094
2019-01-13 00:15:00	6.03	34.51	7.8	31.05	8.7	26.39	9.75	31.58	12.31	1088.25	91.36	50.967
2019-01-13 00:30:00	6.54	33.51	8.18	29.2	9.03	24.41	10.25	30.56	12.43	1088.92	89.61	49.041
2019-01-13 00:45:00	7	33.18	8.57	27.86	9.78	22.54	10.74	29.98	12.35	1088.92	88.74	49.179
2019-01-13 01:00:00	6.75	30.87	8.07	25.56	8.85	20.2	9.96	25.21	12.31	1088.92	89.41	47.763
2019-01-13 01:15:00	6.51	34.35	8.62	29.63	9.34	24.98	9.75	27.39	12.38	1088.92	88.63	47.733
2019-01-13 01:30:00	6.39	33.73	7.79	30.79	8.67	26.28	9.59	30.97	12.56	1088.92	87.01	47.904
2019-01-13 01:45:00	6.73	30.55	8.24	28.35	9.37	23.72	10.54	30.11	12.7	1088.25	85.44	48.725
2019-01-13 02:00:00	6.92	38.66	9.03	35.22	9.78	31.05	10.49	35.8	12.85	1088.92	83.62	48.59
2019-01-13 02:15:00	7.16	46.32	9.8	44.31	10.85	38.6	11.52	43.52	12.82	1088.92	83.13	44.899
2019-01-13 02:30:00	6.89	41.37	9.04	37.85	9.77	34.26	9.91	42.52	12.78	1088.92	83.58	41.072
2019-01-13 02:45:00	6.83	41.08	8.41	38.17	9.49	35.31	10.36	40.77	12.77	1088.92	83.2	40.114
2019-01-13 03:00:00	7.08	38.52	8.99	36.63	9.81	31.86	10.54	36.55	12.73	1088.92	82.82	41.4
2019-01-13 03:15:00	6.88	34.26	8.63	31.67	9.48	26.08	10.51	31.17	12.65	1088.92	82.54	44.986
2019-01-13 03:30:00	7.77	32.76	9.75	30.85	10.96	27.01	11.7	31.74	12.71	1089.58	82.3	47.121
2019-01-13 03:45:00	7.26	35.05	8.9	30.95	9.77	26.51	10.84	31.5	12.66	1088.92	81.34	39.903
2019-01-13 04:00:00	6.24	32.77	8.57	30.77	9.82	26.05	10.78	30.72	12.59	1089.58	81.7	40.124
2019-01-13 04:15:00	6.67	27.67	7.9	24.91	8.63	20.83	9.3	28.49	12.39	1089.58	82.64	40.285
2019-01-13 04:30:00	6.72	30.46	8.6	27.63	9.53	23.51	10.32	30.45	12.41	1089.58	82.56	43.168
2019-01-13 04:45:00	6.26	33.92	7.71	30.43	9.11	26.16	10.28	30.88	12.33	1088.92	82.46	45.417
2019-01-13 05:00:00	6.26	33.92	7.71	30.43	9.11	26.16	10.28	30.88	12.33	1088.92	82.46	48.399
2019-01-13 05:15:00	6.26	33.92	7.71	30.43	9.11	26.16	10.28	30.88	12.33	1088.92	82.46	51.417
2019-01-13 05:30:00	6.26	33.92	7.71	30.43	9.11	26.16	10.28	30.88	12.33	1088.92	82.46	50.515
2019-01-13 05:45:00	6.26	33.92	7.71	30.43	9.11	26.16	10.28	30.88	12.33	1088.92	82.46	49.249
2019-01-13 06:00:00	6.08	32.08	7.65	30.86	8.63	25.15	9.66	30.46	12.13	1088.92	82.35	47.635
2019-01-13 06:15:00	6.14	38.07	7.74	37.58	8.83	32.87	9.64	36.08	12.11	1088.92	81.99	46.093
2019-01-13 06:30:00	6.99	35.02	9.04	32.57	10.22	27.47	11.1	31.06	12.26	1088.92	82.14	53.799
2019-01-13 06:45:00	6.83	36.74	8.52	34.87	9.81	28.85	10.98	34.28	12.17	1088.92	82.25	58.903
2019-01-13 07:00:00	6.49	36.21	8.2	34.36	9.29	29.02	10	33	12.24	1089.58	82.53	55.356
2019-01-13 07:15:00	6.49	36.21	8.2	34.36	9.29	29.02	10	33	12.24	1089.58	82.53	52.558
2019-01-13 07:30:00	6.49	36.21	8.2	34.36	9.29	29.02	10	33	12.24	1089.58	82.53	49.122
2019-01-13 07:45:00	6.49	36.21	8.2	34.36	9.29	29.02	10	33	12.24	1089.58	82.53	42.116
2019-01-13 08:00:00	6.49	36.21	8.2	34.36	9.29	29.02	10	33	12.24	1089.58	82.53	30.702
2019-01-13 08:15:00	6.49	36.21	8.2	34.36	9.29	29.02	10	33	12.24	1089.58	82.53	31.766
2019-01-13 08:30:00	6.49	36.21	8.2	34.36	9.29	29.02	10	33	12.24	1089.58	82.53	38.481
2019-01-13 08:45:00	6.49	36.21	8.2	34.36	9.29	29.02	10	33	12.24	1089.58	82.53	45.038
2019-01-13 09:00:00	6.36	37.65	7.69	10.33	8.69	30.38	9.48	34.94	12.15	1088.92	83.18	42.369
2019-01-13 09:15:00	6.31	32.28	7.9	14.04	8.65	28.63	9.18	35.35	12.12	1089.58	81.81	41.05
2019-01-13 09:30:00	6.1	35.99	7.59	33.24	8.85	30.14	9.75	34.63	12.27	1089.58	82.35	40.014
2019-01-13 09:45:00	5.66	36.23	6.82	35.16	7.65	31.31	8.54	35.41	12.23	1088.92	81.03	34.702
2019-01-13 10:00:00	6.05	38.29	7.11	36.3	7.7	30.42	8.11	34.33	12.24	1088.92	81.45	38.285
2019-01-13 10:15:00	6.04	31.5	7.1	28.27	8.02	26.42	8.57	32.62	12.35	1088.92	81.89	41.457
2019-01-13 10:30:00	6.49	34.58	8.13	32.02	9	26.58	9.59	31.92	12.27	1089.58	81.49	37.613
2019-01-13 10:45:00	6.25	32.17	7.54	30.54	8.43	26.51	9.34	31.69	12.28	1088.92	81.17	36.766
2019-01-13 11:00:00	5.8	34.69	6.89	33.57	7.49	28.15	8.19	32.44	12.31	1089.58	81.29	29.731
2019-01-13 11:15:00	5.58	38.5	6.64	17.93	7.56	30.69	8.26	37.02	12.37	1088.92	81.87	36.485
2019-01-13 11:30:00	6.34	32.34	7.63	29.97	8.79	25.89	9.58	32.06	12.47	1088.92	81.2	39.213
2019-01-13 11:45:00	6.01	39.13	7.36	36.35	8.19	32.06	8.81	36.74	12.48	1089.58	81.51	37.486
2019-01-13 12:00:00	6.21	43.17	7.95	24.35	8.73	31.87	9.08	34.21	12.29	1088.92	81.04	35.921
2019-01-13 12:15:00	5.89	32.53	6.64	9.98	7.12	28.49	7.68	33.3	12.37	1089.58	81.53	30.715
2019-01-13 12:30:00	5.75	39.67	6.86	37.13	7.39	33.38	7.78	37.11	12.57	1088.92	80.69	31.011
2019-01-13 12:45:00	5.89	41.77	7.25	37.87	7.95	31.16	8.32	36.45	12.69	1088.92	80.8	39.502
2019-01-13 13:00:00	6.97	44.56	8.93	41.59	9.47	36.4	10.01	41.33	12.55	1088.92	80.94	40.918
2019-01-13 13:15:00	6.21	41.71	8.18	37.92	9.13	33.72	9.75	39.9	12.68	1088.92	81.54	42.595
2019-01-13 13:30:00	6.27	44.25	8.2	43.12	8.75	38.13	9.06	41.98	12.63	1088.92	82.01	42.969
2019-01-13 13:45:00	6.44	48.74	8.58	45.95	9.23	39.91	9.23	43.99	12.23	1088.92	81.4	43.205
2019-01-13 14:00:00	6.82	50.59	9.2	2	9.85	42.96	9.96	46.43	12.34	1088.92	80.96	46.854
2019-01-13 14:15:00	7.22	50.44	9.57	0.37	10.01	41.36	10.47	46.34	12.41	1088.92	81.57	51.496
2019-01-13 14:30:00	7.28	45.88	9.95	0.4	10.94	38.78	11.35	43.57	12.19	1088.92	81.59	50.911
2019-01-13 14:45:00	7.32	41.76	9.21	40.15	10.28	38.25	10.79	44.63	12.18	1088.92	81.49	51.537
2019-01-13 15:00:00	7.25	51.59	9.81	46.54	10.68	40.76	10.91	44.69	12.09	1088.25	81.57	53.529
2019-01-13 15:15:00	7.41	51.9	9.87	19.55	10.44	41.18	10.42	46.36	12.1	1089.58	81.66	53.225
2019-01-13 15:30:00	7.02	50.11	9.11	3.25	9.81	42.63	9.85	48.56	12.24	1088.92	82.11	50.809
2019-01-13 15:45:00	6.31	46.79	8.43	46.5	9.1	42.87	9.32	49.63	12.27	1088.92	82.22	43.508
2019-01-13 16:00:00	6.14	52.63	7.82	48.52	8.45	43.03	8.51	48.68	12.37	1089.58	82.23	38.484
2019-01-13 16:15:00	6.84	50.25	9.08	6.1	9.73	43.01	9.64	48.51	12.24	1088.92	81.59	42.255
2019-01-13 16:30:00	6.24	49.69	7.97	0.22	8.72	41.81	8.93	46.82	12.44	1088.92	81.07	40.769
2019-01-13 16:45:00	6.57	52.12	8.74	13.42	9.39	42.35	9.67	48.21	12.42	1088.92	79.9	44.064
2019-01-13 17:00:00	6.15	55.67	8.33	52.25	8.97	45.75	8.62	49.65	12.33	1089.58	81.18	43.967
2019-01-13 17:15:00	7.42	46.32	9.51	45.25	9.94	40.89	10.15	45.76	12.44	1088.92	79.98	41.599
2019-01-13 17:30:00	6.64	40.2	8.37	38.99	9.24	35.76	9.35	42.5	12.36	1088.92	78.9	39.87
2019-01-13 17:45:00	7.26	49.44	9.54	44.61	10.33	40.01	10.44	43.32	12.39	1089.58	82.16	41.621
2019-01-13 18:00:00	6.35	41.79	7.95	40.12	9.1	35.82	9.75	42.54	12.26	1088.92	82.28	38.58
2019-01-13 18:15:00	7.94	38.28	9.77	38.74	10.82	35.59	11.12	42.4	12.16	1088.92	82.72	39.374
2019-01-13 18:30:00	7.29	49.53	9.83	48.78	10.45	41.54	10.96	45.07	12.22	1088.92	82.39	39.015
2019-01-13 18:45:00	7.83	43.46	10.29	42.24	11.47	38.45	12.16	43.27	12.21	1088.92	81.91	47.775
2019-01-13 19:00:00	8.27	43.74	10.53	42.8	11.55	37.01	12.37	40.65	12.15	1088.92	81.5	52.808
2019-01-13 19:15:00	8.58	39.2	10.43	38.55	11.52	34.23	12.38	39.5	12	1088.92	81.42	70.739
2019-01-13 19:30:00	8.41	40.64	10.04	36.93	11.22	32.38	12.15	37.38	12.08	1088.92	81.6	74.665
2019-01-13 19:45:00	8.37	36.63	11.21	32.29	12.9	27.47	13.75	32.6	12	1088.92	80.98	72.816
2019-01-13 20:00:00	8.34	37.25	10.74	32.69	12.15	28.21	12.8	33.83	11.97	1088.92	81.98	70.403
2019-01-13 20:15:00	8.12	35.24	9.93	32.54	11.11	28.87	12.05	33.85	12.08	1088.92	82.9	68.787
2019-01-13 20:30:00	7.28	32.84	8.96	30	10.37	26.61	11.57	31.74	11.93	1089.58	82.89	68.485
2019-01-13 20:45:00	6.61	35.73	8.32	34.95	9.49	30.48	10.03	36.64	11.92	1088.25	83.95	72.174
2019-01-13 21:00:00	7.83	36.87	10.33	30.05	11.77	26.89	12.97	33.03	11.65	1088.25	85.19	73.602
2019-01-13 21:15:00	7.93	35.2	10.12	31.86	11.54	27.95	12.67	32.93	11.66	1088.92	85.58	70.353
2019-01-13 21:30:00	6.96	38.1	8.87	33.7	10.17	28.66	11.48	35.22	11.58	1088.92	86.37	72.468
2019-01-13 21:45:00	7.87	36.76	9.72	30.64	11.39	26.56	12.63	32.31	11.49	1088.92	87.41	71.766
2019-01-13 22:00:00	7.97	35.3	10.16	33.8	11.8	29.19	12.8	35	11.43	1088.25	87.16	72.987
2019-01-13 22:15:00	7.23	38.71	9.11	34.46	10.02	30.63	10.83	33.95	11.42	1088.25	87.43	67.464
2019-01-13 22:30:00	7.31	35.19	9.36	33.7	10.69	29.97	11.69	33.85	11.47	1088.92	86.51	68.938
2019-01-13 22:45:00	8.14	35.56	10.3	34.55	11.97	30.16	12.56	35.67	11.48	1088.92	86.17	69.429
2019-01-13 23:00:00	8.05	33.23	9.74	30.53	10.95	26.36	11.97	30.41	11.47	1088.92	86.18	71.521
2019-01-13 23:15:00	8.26	33.81	10.25	32.02	11.65	28.23	12.93	32.78	11.49	1088.92	85.65	72.923
2019-01-13 23:30:00	8.5	32.88	11.03	30.76	12.39	26.65	13.46	31.56	11.53	1088.92	85.05	70.957
2019-01-13 23:45:00	8.4	30.58	10.05	31.89	11.43	27.9	12.48	32.43	11.55	1088.92	85.62	72.026
2019-01-14	8.04	32.48	9.82	29.53	11.01	25.21	11.85	29.47	11.4	1088.92	86.85	77.556
2019-01-14 00:15:00	7.87	30.85	9.5	27.81	10.59	24.88	11.72	30.23	11.33	1088.92	86.07	78.187
2019-01-14 00:30:00	8.18	33.43	9.85	29.84	11.17	26.95	12.18	32.53	11.32	1088.92	85.38	74.178
2019-01-14 00:45:00	8.16	33.09	10.02	29.51	11.54	25.53	12.92	31.87	11.35	1088.92	84.12	73.705
2019-01-14 01:00:00	8.91	31.45	11.2	28.11	12.61	24.85	13.56	30.67	11.37	1088.25	83.29	72.411
2019-01-14 01:15:00	9.06	35.91	11.55	31.96	13.24	27.82	14.25	33.22	11.41	1088.92	82.46	72.115
2019-01-14 01:30:00	8.33	31.41	10.25	30.07	11.43	25.79	12.34	30.99	11.44	1088.92	82.11	71.464
2019-01-14 01:45:00	8.05	32.73	9.77	30.48	10.71	25.25	11.72	32.42	11.43	1088.92	81.95	71.167
2019-01-14 02:00:00	8.81	36.18	11.01	30.29	12.66	25.41	13.78	32.63	11.42	1088.92	81.89	70.257
2019-01-14 02:15:00	8.8	33.41	11.17	30.83	12.72	27.65	13.77	33.43	11.36	1088.92	81.95	72.187
2019-01-14 02:30:00	8.29	34.15	10.53	29.32	12.16	26.09	13.49	32.88	11.43	1088.92	82.18	70.761
2019-01-14 02:45:00	8.07	35.35	9.55	33.69	10.54	31.91	11.49	38.12	11.42	1089.58	81.77	66.4
2019-01-14 03:00:00	7.91	37.53	9.64	33.26	10.69	29.72	11.37	36.51	11.38	1088.92	81.15	55.929
2019-01-14 03:15:00	7.61	34.57	9.66	30.58	10.97	26.65	12.05	34.25	11.51	1088.92	81.14	46.726
2019-01-14 03:30:00	7.09	36.44	9.08	31.03	10.24	26.52	11.01	32.99	11.62	1088.92	81.42	41.532
2019-01-14 03:45:00	7.09	34.92	9.33	31.16	10.32	26.9	11.1	34.62	11.57	1088.92	81.14	38.704
2019-01-14 04:00:00	6.88	33.21	8.42	30.74	9.57	27.38	10.56	34.29	11.73	1088.92	80.9	35.73
2019-01-14 04:15:00	7.15	37.15	9.06	34.21	10.35	30.98	10.83	37.77	11.83	1089.58	81.83	36.532
2019-01-14 04:30:00	7.31	40.3	9.05	37.67	10.13	33.1	10.89	39.99	11.77	1088.92	80.53	36.567
2019-01-14 04:45:00	7.45	40.96	9.84	38.08	11.16	35.09	11.71	42.17	11.72	1088.92	80.54	36.104
2019-01-14 05:00:00	7.26	41.72	9.2	41.35	10.13	38.33	10.5	45.63	11.87	1088.92	80.18	34.932
2019-01-14 05:15:00	6.82	38.99	8.53	34.9	9.49	32.35	9.94	40.84	11.78	1089.58	80.55	37.716
2019-01-14 05:30:00	6.2	34.61	7.88	33.64	8.98	30.43	9.62	39.71	11.81	1088.92	80.94	45.545
2019-01-14 05:45:00	6.79	38.74	8.67	34.91	9.68	32.06	10.51	36.41	11.7	1089.58	80.28	46.481
2019-01-14 06:00:00	6.3	44.47	8.02	41.1	8.83	36.41	9.43	41.79	11.83	1088.92	80.48	43.46
2019-01-14 06:15:00	6.29	32.31	7.99	30.19	9.05	26.97	9.59	32.1	11.69	1088.92	79.68	44.963
2019-01-14 06:30:00	6.69	37.13	8.14	34.15	8.94	30.51	9.92	35.82	11.84	1089.58	79.32	41.117
2019-01-14 06:45:00	6.62	36.86	8.71	30.15	10.11	26.34	11.04	32.1	11.97	1088.92	80.36	44.312
2019-01-14 07:00:00	6.74	32.94	8.53	31.43	9.86	28.72	10.65	35.36	12	1088.92	80.3	43.334
2019-01-14 07:15:00	6.31	36.13	8.08	31.53	9.12	27.79	9.9	31.75	11.88	1089.58	80	46.379
2019-01-14 07:30:00	7.17	35.79	8.89	30.32	10.04	26.03	11.04	32.5	11.94	1088.92	79.59	49.745
2019-01-14 07:45:00	7.06	37.12	9.28	33.09	10.73	29.99	11.46	35.39	12.04	1088.92	79.4	48.798
2019-01-14 08:00:00	5.92	38.87	7.39	11.83	8.8	31.15	9.69	34.51	12.16	1088.92	80.25	45.634
2019-01-14 08:15:00	6.78	33.14	8.45	31.57	9.67	27.62	10.44	35.38	12.11	1088.92	78.86	49.446
2019-01-14 08:30:00	6.2	40.32	7.63	37.12	8.43	33.02	9.06	38.68	12.28	1088.92	79.87	40.893
2019-01-14 08:45:00	6.18	41.26	7.57	36.73	7.95	33.04	8.69	37.41	12.26	1088.92	79.43	37.456
2019-01-14 09:00:00	6.67	37.43	8.31	33.31	9.08	29.74	9.55	33.89	12.46	1088.92	78.95	37.343
2019-01-14 09:15:00	7.1	27.36	8.64	25.67	9.6	24.67	10.16	31.71	12.63	1088.92	79.05	36.474
2019-01-14 09:30:00	6.27	37.43	7.65	29.43	8.45	25.78	9.18	30.51	12.68	1088.92	77.79	38.957
2019-01-14 09:45:00	6.57	31.62	8.46	22.93	9.32	24.11	9.99	29.85	12.77	1088.92	77.66	38.314
2019-01-14 10:00:00	6.84	34.85	8.85	29.13	10.11	25.97	10.84	32.39	13.06	1088.92	77.17	28.626
2019-01-14 10:15:00	7.34	32.93	9.07	27.36	9.82	23.05	10.75	29.45	13.07	1088.92	76.66	40.167
2019-01-14 10:30:00	7.09	34.99	8.69	30.05	9.29	26.31	9.5	30.27	13.25	1088.25	76.46	35.79
2019-01-14 10:45:00	6.84	34.48	8.43	28.56	9.31	25.22	9.68	29.33	13.45	1088.25	76.11	28.585
2019-01-14 11:00:00	7.42	28.33	8.69	24.15	9.59	19.47	10.17	24.02	13.66	1088.92	75.88	27.017
2019-01-14 11:15:00	6.92	28.23	7.69	22.6	8.29	18.53	8.97	26.06	13.81	1088.92	74.87	27.082
2019-01-14 11:30:00	6.14	39.68	7.85	35.22	8.41	30.94	8.48	31.69	14.03	1088.92	74.95	25.864
2019-01-14 11:45:00	6.76	29.48	8.12	21.12	8.99	18.48	9.52	23.74	14.3	1088.25	73.82	28.382
2019-01-14 12:00:00	6.96	39.15	8.84	7.36	9.63	26.89	9.93	28.69	14.08	1088.25	74.25	29.086
2019-01-14 12:15:00	7.07	37.41	8.74	22.37	10.07	26.84	10.08	28.72	14.11	1088.25	74.62	28.234
2019-01-14 12:30:00	6.6	34.35	8.02	29.61	9.16	25.76	9.44	30.3	14.12	1088.92	76.27	26.569
2019-01-14 12:45:00	6.77	35.4	8.4	29.31	9.19	26.04	9.75	31.62	14.04	1088.92	76.45	28.823
2019-01-14 13:00:00	6.75	35.51	8.12	31.03	9.16	27.1	9.76	33.16	14	1088.25	76.33	22.339
2019-01-14 13:15:00	6.58	44.68	9.04	44.24	9.41	38.57	9.11	39.16	13.75	1088.25	77.67	25.128
2019-01-14 13:30:00	6.22	44.43	8.5	42.53	9.38	38.26	9.71	40.64	13.89	1088.25	77.66	21.721
2019-01-14 13:45:00	6.54	44.87	8.49	41.22	9.04	37.78	9.44	42.12	13.94	1088.92	77.21	22.405
2019-01-14 14:00:00	6.5	44.12	8.51	40.66	9.26	37.45	9.6	42.23	13.91	1088.25	77.19	29.752
2019-01-14 14:15:00	5.93	41.58	7.27	40.17	7.81	36.25	8.25	42.9	13.68	1088.25	78.8	25.558
2019-01-14 14:30:00	6.86	41.28	8.52	16.5	9.2	38.6	9.97	43.6	13.56	1088.25	78.35	25.937
2019-01-14 14:45:00	6.83	48.63	9.22	43.87	9.85	40.95	10.53	45.6	13.69	1088.92	79.45	35.461
2019-01-14 15:00:00	7.09	44.76	9.1	43.05	9.76	38.53	10.35	44.03	13.89	1088.92	79.52	37.366
2019-01-14 15:15:00	7.46	43.26	9.76	24.99	10.69	38.01	11.28	43.81	13.74	1088.25	78.91	50.704
2019-01-14 15:30:00	7.66	50.09	10.62	43.85	11.49	39.13	12.03	41.88	13.48	1088.25	79.39	65.888
2019-01-14 15:45:00	8.3	45.56	10.64	0.42	11.91	37.02	12.43	42.44	13.54	1088.25	79.79	65.404
2019-01-14 16:00:00	7.51	43.35	9.51	0.43	10.29	36.09	10.67	40.18	13.59	1087.58	79.02	59.829
2019-01-14 16:15:00	7.19	41.26	8.89	32.15	9.95	35.75	10.47	41.07	13.38	1088.25	79.58	51.815
2019-01-14 16:30:00	7.06	45.97	9.17	7.12	10.09	35.3	10.64	40.58	13.46	1088.25	80.03	55.356
2019-01-14 16:45:00	6.97	41.6	8.94	34.88	9.75	30.81	10.49	36.46	13.38	1088.92	80.54	52.796
2019-01-14 17:00:00	7.94	47.23	10.11	41.36	11.09	38.21	11.79	41.72	13.19	1088.25	81.35	55.075
2019-01-14 17:15:00	7.56	46.38	10.25	12.68	11.02	37.64	11.74	41.86	13.31	1088.92	81.99	54.689
2019-01-14 17:30:00	7.02	39.09	8.97	0.44	9.91	34.41	10.6	39.21	13.19	1088.92	81.04	53.413
2019-01-14 17:45:00	7.04	38.68	9.22	0.45	10.16	30.87	11.24	36.8	13.25	1088.92	81.1	56.048
2019-01-14 18:00:00	7.07	43.36	8.84	0.43	9.74	34.93	10.78	38.17	13.32	1088.92	81.74	52.182
2019-01-14 18:15:00	7.16	39.31	8.61	26.08	9.55	29.57	10.53	34.59	13.44	1088.25	81.06	47.812
2019-01-14 18:30:00	6.63	42.08	8.42	37.4	9.39	34.31	10.14	38.76	13.36	1088.92	81.51	47.253
2019-01-14 18:45:00	6.64	33.31	8.41	31.17	9.47	28.62	10.53	34.89	13.47	1088.92	82.14	48.449
2019-01-14 19:00:00	7.53	34.22	9.33	30.32	10.36	27.95	11.42	31.52	13.38	1088.92	81.18	46.157
2019-01-14 19:15:00	7.16	34.92	8.64	29.25	9.73	27.06	11.14	31.31	13.54	1088.92	80.4	46.387
2019-01-14 19:30:00	7.15	34.2	8.8	29.84	9.96	25.74	11.34	30.12	13.59	1088.92	79.79	41.787
2019-01-14 19:45:00	7.16	34.87	8.85	29.89	10.24	27.48	11.09	32.26	13.6	1088.92	79.9	39.438
2019-01-14 20:00:00	6.52	35.14	7.82	29.73	8.75	25.95	10.23	30.82	13.64	1088.92	80.27	39.745
2019-01-14 20:15:00	6.78	38.38	8.16	31.88	9.35	29.05	10.72	33.64	13.61	1088.92	80.07	38.624
2019-01-14 20:30:00	6.61	38.29	8.1	32.71	9.16	28.62	9.76	31.65	13.64	1088.92	80.12	34.165
2019-01-14 20:45:00	6.39	32.23	7.57	26.63	8.52	24.91	9.73	29.31	13.72	1088.92	79.93	26.495
2019-01-14 21:00:00	6.63	33.53	8.19	27.03	9.22	23.64	10.33	30.06	13.71	1088.92	79.92	31.201
2019-01-14 21:15:00	6.7	29	7.95	23.95	8.94	19.48	10.33	25.21	13.82	1088.92	80.79	28.626
2019-01-14 21:30:00	6.06	25.96	6.86	18.21	7.31	14.71	8.25	22.33	13.82	1088.92	80.47	19.374
2019-01-14 21:45:00	4.34	19.6	5.01	9.17	5.79	5.16	6.36	10.14	13.88	1088.92	80.37	12.245
2019-01-14 22:00:00	5.49	31.04	6.54	25.5	7.12	20.76	7.94	24.05	13.92	1088.92	80.18	16.527
2019-01-14 22:15:00	6.47	27.53	7.33	22.97	7.93	17.1	8.77	21.06	13.96	1088.92	80.11	19.273
2019-01-14 22:30:00	6.31	23.83	7.1	18.89	7.68	14.31	8.88	18.93	14.08	1088.25	78.73	17.486
2019-01-14 22:45:00	6.38	26.02	6.93	19.99	7.6	14.43	8.67	20.39	14.19	1088.92	78.12	17.421
2019-01-14 23:00:00	6.68	23.84	7.19	16.51	7.65	11.13	8.39	14.5	14.33	1088.92	77.48	12.083
2019-01-14 23:15:00	5.61	18.9	6.37	10.78	7.32	5.65	8.26	8.81	14.45	1088.92	77.16	10.911
2019-01-14 23:30:00	5.27	22.5	5.94	16.28	6.28	12.1	7.35	15.03	14.6	1088.92	76.82	9.561
2019-01-14 23:45:00	5.11	28.5	6.19	23.91	6.68	18.66	7.76	21.62	14.6	1088.92	77.04	12.192
2019-01-15	4.36	29.23	5.47	22.89	6.21	16.91	7.51	21.77	14.45	1088.25	78.34	11.946
2019-01-15 00:15:00	4.27	28.86	5.28	22.33	5.94	15.87	6.71	20.52	14.6	1088.92	78.25	11.755
2019-01-15 00:30:00	4.23	24.47	4.83	16.62	5.36	12.04	7	17.27	14.87	1088.25	76.47	11.418
2019-01-15 00:45:00	4.63	20.36	5.44	12.95	5.79	9.86	7.06	13.41	15.15	1088.92	75.09	11.047
2019-01-15 01:00:00	4.6	22.76	5.5	15.52	6.22	12.25	7.53	14.85	15.23	1088.25	74.95	12.744
2019-01-15 01:15:00	4.92	20.14	5.71	10.16	6.57	7.38	7.84	10.78	15.39	1089.58	73.98	8.423
2019-01-15 01:30:00	4.05	20.45	4.95	15.09	5.64	11.83	6.72	14.71	15.42	1088.92	73.78	7.423
2019-01-15 01:45:00	4.22	26.57	5.2	22.04	6	14.91	7.26	18.71	15.28	1088.92	74.73	12.903
2019-01-15 02:00:00	3.41	34.28	4.74	33.72	5.83	27.44	6.85	33.74	15.04	1088.25	76.78	12.305
2019-01-15 02:15:00	3.99	26.12	4.52	21.94	5.09	17.02	6.37	24.81	14.95	1088.25	77.47	8.188
2019-01-15 02:30:00	2.92	30.9	3.92	26.97	4.65	22.6	5.7	27.91	14.72	1088.92	79.56	10.87
2019-01-15 02:45:00	4.15	32.16	5.2	27.38	5.94	24.47	7.25	30.56	14.66	1088.92	80.03	15.507
2019-01-15 03:00:00	3.98	28.62	5.09	25.26	5.99	19.73	7.72	24.91	14.54	1088.92	80.87	11.79
2019-01-15 03:15:00	4.65	29.16	5.46	24.08	6.39	16.82	7.6	22.45	14.56	1088.92	80.33	12.319
2019-01-15 03:30:00	3.87	30.54	4.92	27.32	5.68	20.41	6.77	22.58	14.73	1088.25	79.13	11.312
2019-01-15 03:45:00	4.15	32.6	5.32	27.36	6.06	20.85	7.01	22.87	14.81	1088.92	79.13	13.511
2019-01-15 04:00:00	4.48	26.34	4.99	20.79	5.44	13.49	6.62	18.29	14.99	1088.25	77.61	9.854
2019-01-15 04:15:00	4.23	24.49	4.71	18.31	5.36	11.34	6.57	16.28	15.2	1088.92	76.38	6.946
2019-01-15 04:30:00	3.32	25.08	4.32	20.33	5.18	14.02	6.8	17.93	15.08	1088.25	77.78	7.761
2019-01-15 04:45:00	3.27	30.89	4.56	25.66	5.58	18.09	7.14	21.67	15.16	1088.25	77.69	6.357
2019-01-15 05:00:00	3.25	34.43	4.41	30.37	5.46	24.97	6.84	28.26	15.05	1088.25	79.42	6.199
2019-01-15 05:15:00	2.45	30.58	3.52	27.04	4.64	22.15	6.05	27.75	14.64	1088.92	82.46	3.029
2019-01-15 05:30:00	2.15	29.21	3.34	18.83	4.2	12.62	5.49	15.94	14.75	1088.92	81.73	2.25
2019-01-15 05:45:00	3.23	45.39	4.71	41.24	5.45	36.02	6.9	35.42	14.99	1088.92	79.97	5.767
2019-01-15 06:00:00	4.48	29.5	5.56	27.92	6.58	26.53	7.94	31.82	14.94	1088.92	79.91	6.732
2019-01-15 06:15:00	4.32	25.25	5.31	23.02	6.61	21.25	8.41	26.41	14.81	1088.92	81.86	10.243
2019-01-15 06:30:00	3.43	37.77	4.51	35.68	5.46	30.82	6.9	33.18	15.04	1088.92	79.47	10.937
2019-01-15 06:45:00	3.46	28.31	3.88	26.33	4.64	23.63	6.22	30.06	15.1	1088.92	79.09	7.928
2019-01-15 07:00:00	3.26	38.47	4.24	31.29	5.69	26.94	7.26	32.98	15.19	1088.92	78.85	10.981
2019-01-15 07:15:00	3.67	43.97	4.74	40.07	5.5	33.28	6.97	37.09	15.12	1088.92	79.21	9.243
2019-01-15 07:30:00	3.81	37.92	5.06	36.42	5.88	30.48	6.97	34.38	15.2	1088.25	77.97	9.273
2019-01-15 07:45:00	3.81	37.92	5.06	36.42	5.88	30.48	6.97	34.38	15.2	1088.25	77.97	15.663
2019-01-15 08:00:00	3.81	37.92	5.06	36.42	5.88	30.48	6.97	34.38	15.2	1088.25	77.97	10.544
2019-01-15 08:15:00	3.81	37.92	5.06	36.42	5.88	30.48	6.97	34.38	15.2	1088.25	77.97	10.72
2019-01-15 08:30:00	3.81	37.92	5.06	36.42	5.88	30.48	6.97	34.38	15.2	1088.25	77.97	7.202
2019-01-15 08:45:00	2.82	29.54	3.98	26.15	4.65	19.91	5.64	21.74	15.04	1088.92	80.59	6.891
2019-01-15 09:00:00	2.49	30.58	3.21	29.09	4.07	24.08	4.92	29.4	15.13	1088.25	80.72	10.607
2019-01-15 09:15:00	3.88	36.64	5.18	36.26	6.18	32.49	6.78	34.12	14.92	1088.92	81.89	12.076
2019-01-15 09:30:00	4.14	46.26	5.76	46.42	6.29	41.41	7	45	15.15	1088.92	81.9	12.118
2019-01-15 09:45:00	3.05	70.56	4.51	58.97	5.02	48.65	5.54	46.47	15.1	1088.92	82.67	12.566
2019-01-15 10:00:00	2.85	53.3	4.66	48.84	5.37	41.57	6.18	43.58	15.19	1088.92	82.21	12.104
2019-01-15 10:15:00	3.57	43.66	4.86	41.64	5.27	38.8	5.98	43.53	15.52	1088.25	80.14	12.394
2019-01-15 10:30:00	2.61	41.34	3.4	44.93	4.2	40.43	5.06	45.69	15.75	1088.25	77.75	9.701
2019-01-15 10:45:00	3.44	59.9	4.85	49.83	5.35	43.66	6.05	46.51	15.82	1088.92	76.4	12.171
2019-01-15 11:00:00	3.01	67.31	3.77	52.24	3.98	41.67	4.51	43.61	15.65	1088.92	77.12	16.151
2019-01-15 11:15:00	5.22	42.87	7.13	44.47	7.56	39.58	8.22	44.58	15.64	1088.92	76.67	15.954
2019-01-15 11:30:00	5.81	47.56	7.29	43.91	7.64	38.52	8.11	42	15.53	1088.92	77.19	18.886
2019-01-15 11:45:00	5.61	41.79	6.94	38.69	7.57	34.16	8.49	39.02	15.43	1087.58	77.46	15.57
2019-01-15 12:00:00	4.98	37.68	6.2	0.43	7.13	31.16	7.8	34.51	15.32	1088.25	79.89	17.369
2019-01-15 12:15:00	5.93	43.52	7.49	0.42	8.26	35.85	9.04	41.65	14.99	1088.92	82.44	25.096
2019-01-15 12:30:00	4.53	64.85	6.34	2.03	6.51	47.34	6.78	51.5	14.58	1088.92	84	20.645
2019-01-15 12:45:00	5.13	42.87	6.48	38.35	7.31	35.73	8.07	41.8	14.42	1088.25	84.18	29.967
2019-01-15 13:00:00	6.23	41.8	7.98	0.4	8.89	34.76	9.65	41.19	14.22	1088.25	85.09	38.84
2019-01-15 13:15:00	6.24	39.71	7.86	36.7	8.8	34.28	9.7	41.1	14.28	1088.25	85.46	46.992
2019-01-15 13:30:00	5.89	51.63	8.76	47.68	9.44	44.93	10.3	50.15	14.19	1088.92	85.38	39.406
2019-01-15 13:45:00	5.58	57.29	7.42	49.88	7.84	43.95	7.95	49.06	14.09	1088.92	86.74	36.707
2019-01-15 14:00:00	4.98	49.46	6.57	44.08	7.29	39.45	8.08	45.41	13.87	1088.92	87.19	36.731
2019-01-15 14:15:00	5.73	46.65	7.88	43.87	8.86	40.01	9.78	44.6	13.86	1088.25	87.71	39.23
2019-01-15 14:30:00	6.61	42.55	8.46	38.82	9.38	34.15	10.3	40.24	13.86	1088.25	86.57	44.586
2019-01-15 14:45:00	6.4	36.11	8.03	36.16	9.03	33.67	9.65	40.11	13.96	1088.25	85.92	48.714
2019-01-15 15:00:00	6.07	43	7.44	41.31	8.41	37.77	9.22	42.49	13.79	1088.92	86.6	60.424
2019-01-15 15:15:00	6.83	40.75	8.63	38.45	9.59	36.4	10.1	39.67	13.84	1088.92	87.05	65.132
2019-01-15 15:30:00	7.12	35	9.13	35.37	10.19	32.99	11.38	37.31	13.72	1088.92	86.86	68.034
2019-01-15 15:45:00	7.32	39.86	8.94	34.98	9.76	31.38	10.39	36.34	13.52	1088.92	87.81	69.838
2019-01-15 16:00:00	9.45	30.84	11.29	29.05	12.42	26.47	13.08	32.69	13.15	1088.92	88.92	71.11
2019-01-15 16:15:00	8.59	38.38	11.01	32.13	12.21	29.1	12.81	35.84	13.08	1088.92	89.31	73.663
2019-01-15 16:30:00	7.44	37.89	9.24	32.59	10.32	29.76	10.91	35.72	13.04	1088.25	89.72	69.541
2019-01-15 16:45:00	7.87	34.12	9.36	30.11	10.49	28.46	11.05	34.65	12.99	1088.25	89.59	64.265
2019-01-15 17:00:00	8.64	42.57	10.54	36.09	11.83	34.85	12.33	38.62	12.98	1088.92	89.69	70.057
2019-01-15 17:15:00	6.95	38.77	8.87	34.17	9.88	31.37	10.49	37.85	13.03	1088.92	89.82	77.301
2019-01-15 17:30:00	8.21	40.15	10.31	38.26	11.31	35.24	12.07	42.75	13	1088.25	90.06	81.12
2019-01-15 17:45:00	7.31	35.98	9.27	31.62	10.14	30.14	10.73	39.33	12.77	1088.92	90.44	76.447
2019-01-15 18:00:00	8.37	47.73	11.19	44.1	12.28	40.88	12.95	45.69	12.8	1088.25	90.77	82.607
2019-01-15 18:15:00	8.89	54.46	12.02	49.24	12.84	45.85	13.26	51.16	12.8	1088.92	90.66	77.471
2019-01-15 18:30:00	8.34	46.66	11.43	45.24	12.66	43.16	12.89	50.48	12.7	1088.25	90.3	77.947
2019-01-15 18:45:00	8.37	49.08	11.68	46.67	12.4	43.37	12.71	50.04	12.62	1088.92	89.36	75.357
2019-01-15 19:00:00	8.38	49.96	11.99	46.28	12.89	42.09	13.23	47.56	12.6	1088.92	89.06	78.233
2019-01-15 19:15:00	8.71	48.28	12.07	44.71	13.25	40.66	13.84	46.27	12.72	1088.92	88.81	84.291
2019-01-15 19:30:00	9.07	43.51	11.91	41.53	13.35	38.63	13.89	44.53	12.64	1088.92	88.06	85.734
2019-01-15 19:45:00	8.58	42.33	10.8	40.43	12.38	38.3	12.95	44.22	12.5	1088.92	88.27	85.56
2019-01-15 20:00:00	9.13	46.72	11.95	44.58	13.02	38.97	13.69	43.39	12.34	1088.25	88.05	86.818
2019-01-15 20:15:00	9.4	45.39	12.02	43	12.92	39.59	13.48	45.69	12.49	1088.92	88.14	85.264
2019-01-15 20:30:00	8.57	41.71	10.63	39.54	11.99	37.08	12.83	43.49	12.44	1088.92	87.76	84.188
2019-01-15 20:45:00	8.4	40.37	10.61	40.01	11.86	36.93	12.64	43.12	12.42	1088.92	87.28	85.109
2019-01-15 21:00:00	9.65	41.81	12.43	40.89	14	38.21	15.08	42.91	12.38	1088.92	86.24	85.437
2019-01-15 21:15:00	8.5	42.72	10.73	40.22	11.93	37.35	12.59	42.37	12.34	1088.92	86.38	84.032
2019-01-15 21:30:00	9.42	39.82	12.03	39.89	13.87	36	15.03	41.34	12.31	1088.92	85.6	84.377
2019-01-15 21:45:00	8.64	37.03	10.83	36.3	12.63	33.57	13.63	39.5	12.22	1088.25	85.3	83.564
2019-01-15 22:00:00	9.58	39.25	11.88	36.73	12.98	34.37	14.26	39.58	12.1	1088.92	86.27	82.264
2019-01-15 22:15:00	9.86	41.73	12.87	40.36	14.31	36.25	15.54	41.39	11.68	1088.92	87.67	87.689
2019-01-15 22:30:00	8.57	39.79	10.81	36.91	12.11	34.61	12.88	38.64	11.59	1088.92	88.22	81.452
2019-01-15 22:45:00	9.65	42.11	12.43	39.74	13.84	37.15	15	42.78	11.7	1088.92	88.35	86.034
2019-01-15 23:00:00	9.68	38.81	11.88	36.48	13.02	33.32	14.38	37.93	11.41	1088.92	89.04	87.891
2019-01-15 23:15:00	9.71	43.18	11.94	38.45	13.14	35.69	14.57	41.11	11.34	1088.92	89.28	87.645
2019-01-15 23:30:00	8.97	38.91	11.46	35.78	12.84	33.4	13.87	37.4	11.22	1088.25	88.18	87.107
2019-01-15 23:45:00	9.21	38.29	11.41	35.89	12.79	33.77	14.06	38.7	11.45	1088.92	87.3	88.209
2019-01-16	9.83	39.44	12.3	37.73	13.69	32.04	14.98	36.85	11.4	1088.92	85.66	88.983
2019-01-16 00:15:00	9.7	40.98	12.22	37.93	13.55	35.27	14.75	41.47	11.55	1088.92	83.39	86.429
2019-01-16 00:30:00	9.63	42.47	12.4	39.51	14	36.9	14.97	42.21	11.66	1088.92	82.96	88.001
2019-01-16 00:45:00	10.39	44.32	13.64	23.55	14.8	39.49	15.89	44.88	11.76	1088.92	81.84	87.031
2019-01-16 01:00:00	9.59	45.65	12.44	6.51	13.94	38.67	14.89	44.57	11.65	1088.92	80.63	86.69
2019-01-16 01:15:00	9.46	39.22	12.58	0.42	14.3	35.76	15.43	42.17	11.63	1088.92	80.61	86.819
2019-01-16 01:30:00	9.78	40.32	12.25	0.43	13.79	37.02	14.87	42.87	11.63	1089.58	81.09	89.309
2019-01-16 01:45:00	9.68	44.99	13.11	0.42	14.73	36.87	15.7	42.96	11.69	1088.92	80.72	90.533
2019-01-16 02:00:00	9.34	46.33	12.89	43.88	14.24	40.11	15.22	45.06	11.66	1088.92	80.81	88.967
2019-01-16 02:15:00	9.74	46.99	12.77	43.68	13.97	39.37	14.45	43.61	11.59	1088.92	80.79	88.834
2019-01-16 02:30:00	9.8	38.46	12.87	38.85	14.68	36.5	15.52	41.98	11.5	1088.92	80.42	89.36
2019-01-16 02:45:00	9.46	40.03	12.39	38.74	13.98	36.03	14.98	42.17	11.47	1089.58	78.97	89.058
2019-01-16 03:00:00	9.79	44.57	13.78	46	15.04	41.85	15.74	46.71	11.45	1088.92	80.21	89.544
2019-01-16 03:15:00	9.01	46.23	12.47	44.07	14.02	40.27	14.75	45.82	11.54	1089.58	80.31	86.755
2019-01-16 03:30:00	9.89	49.78	13.98	47.09	15.45	41.74	16.26	45.97	11.49	1088.92	80.25	89.808
2019-01-16 03:45:00	10	40.24	12.69	39.25	13.92	36.09	14.94	43.25	11.45	1088.92	80.47	88.908
2019-01-16 04:00:00	10.23	42.19	13.49	39.76	15.17	35.87	16.36	41.47	11.29	1088.92	81.02	89.517
2019-01-16 04:15:00	9.14	41.61	12.39	40.53	13.99	37.32	14.73	41.85	11.23	1088.92	80.01	88.573
2019-01-16 04:30:00	8.89	40.1	12.41	38.62	14.05	36.72	15.29	41.54	11.17	1088.92	79.86	89.492
2019-01-16 04:45:00	9.6	42.82	12.68	40.57	13.79	37.36	14.75	42.61	11.11	1088.92	81.38	89.846
2019-01-16 05:00:00	8.47	37.74	10.83	37.71	12.12	35.42	13.03	40.7	11.06	1088.92	81.23	88.519
2019-01-16 05:15:00	9.2	39.69	12.44	38.16	14.1	33.99	15.09	39.77	11.09	1089.58	80.73	88.736
2019-01-16 05:30:00	10.62	50.53	14.29	46.19	15.74	41.91	16.28	47.75	11.22	1088.92	79.6	89.555
2019-01-16 05:45:00	9.15	44.52	11.86	42.88	13.03	39.31	13.6	44.25	11.22	1089.58	82.11	87.96
2019-01-16 06:00:00	9.25	45.59	12.12	42.14	13.53	39.79	14.35	45.08	11.09	1088.92	82.45	86.031
2019-01-16 06:15:00	9.72	44.99	12.57	41.16	13.67	37.02	14.37	42.22	10.91	1088.92	83.03	87.035
2019-01-16 06:30:00	9.19	38.44	11.56	35.81	13.08	33.38	13.54	40.31	10.79	1088.25	83.37	88.416
2019-01-16 06:45:00	8.61	43.06	11.17	41.06	12.62	38.37	13.3	42.46	10.83	1088.92	82.58	84.19
2019-01-16 07:00:00	9.88	38.69	12.22	36.43	13.5	34.86	14.27	41.15	10.78	1088.92	81.78	87.045
2019-01-16 07:15:00	9.7	42.19	12.39	39.83	13.83	35.77	14.31	40.17	10.63	1088.92	84.45	88.054
2019-01-16 07:30:00	8.96	41.67	11.7	39.75	13.15	36.99	13.72	40.5	10.29	1088.25	83.77	87.266
2019-01-16 07:45:00	8.87	42.41	10.94	38.58	12.11	36.08	12.65	42.46	10.51	1088.25	83.87	87.84
2019-01-16 08:00:00	9.12	39.26	12.21	37.77	13.52	34.73	14.09	41.54	10.67	1088.92	82.31	91.007
2019-01-16 08:15:00	9.71	46.22	13.31	44.45	14.59	39.88	15.2	45.46	10.68	1088.92	81.04	89.585
2019-01-16 08:30:00	9.39	40.99	11.89	40.12	13.2	36.85	13.56	42.63	10.69	1089.58	80.96	89.788
2019-01-16 08:45:00	8.54	47.9	11.93	47.33	13.26	40.64	13.91	46.77	10.74	1089.58	81.33	88.649
2019-01-16 09:00:00	9.41	51.4	13.69	47.36	14.79	42.66	15.35	47.14	10.7	1088.92	79.73	89.72
2019-01-16 09:15:00	9.98	38.83	13.11	41.61	14.23	37.76	15.14	42.76	10.77	1089.58	80.43	89.692
2019-01-16 09:30:00	9.96	43.99	12.78	43.24	14.15	38.3	14.81	43.62	10.76	1088.92	78.01	89.613
2019-01-16 09:45:00	9.99	45.37	13.13	42.9	14.23	37.9	15.17	42.53	10.94	1088.92	78.75	90.416
2019-01-16 10:00:00	10.23	38.27	12.89	36.94	14.24	33.09	14.75	38.86	10.97	1088.25	77.79	90.602
2019-01-16 10:15:00	9.64	40.43	12.32	37.38	13.92	34.3	15.27	40.2	10.9	1088.25	77.1	89.501
2019-01-16 10:30:00	9.76	42.1	12.44	40.24	13.47	36.48	14.58	41.02	11.04	1088.92	78.67	90.371
2019-01-16 10:45:00	9.42	42.37	12.32	42.5	13.3	38.03	14.21	41.49	10.87	1088.92	78.54	87.818
2019-01-16 11:00:00	9.31	43.39	11.8	41.81	13.07	38.73	13.74	44.19	10.71	1088.92	77.22	89.563
2019-01-16 11:15:00	9.73	40.99	12.48	11.34	14.12	34.69	14.92	40.32	10.6	1088.92	76.65	89.046
2019-01-16 11:30:00	9.18	41.35	11.94	0.41	13.05	37.22	13.75	42.49	10.66	1088.92	78.36	86.82
2019-01-16 11:45:00	7.78	46.17	11.25	0.39	12.04	40.18	12.61	45.14	10.97	1088.92	78.64	83.298
2019-01-16 12:00:00	8.78	41.38	11.26	0.43	12.59	35.71	13.91	41.85	10.86	1088.92	78.63	85.843
2019-01-16 12:15:00	9.22	40.19	11.66	0.45	12.89	34.86	13.36	40.68	10.88	1088.92	78.62	82.867
2019-01-16 12:30:00	9.08	40.43	11.08	38.18	12.27	33.61	12.77	38.31	10.9	1088.92	78.22	81.943
2019-01-16 12:45:00	8.65	39.89	11.13	36.77	12.05	33.19	12.83	37.2	10.73	1088.25	78.04	84.233
2019-01-16 13:00:00	8.18	41.08	9.95	0.42	10.97	35.91	11.72	40.1	10.66	1088.92	77.58	78.603
2019-01-16 13:15:00	8.55	33.88	10.31	4.87	12.01	27.56	13.18	32.66	10.4	1088.92	79.47	84.546
2019-01-16 13:30:00	9.19	36.43	11.57	21.08	12.8	29.59	13.71	35.4	10.51	1088.92	79.98	85.352
2019-01-16 13:45:00	9.26	33.47	12.04	30.1	13.54	28.28	14.29	33.08	10.4	1088.92	80.42	87.301
2019-01-16 14:00:00	9.78	33.61	12.45	29.32	14.14	26.62	15.57	31	10.48	1088.92	79.91	84.009
2019-01-16 14:15:00	7.9	35.67	10.25	31.61	11.49	28.21	12.23	34.69	10.23	1088.92	82.17	77.199
2019-01-16 14:30:00	9.37	34.56	11.97	30.91	13.64	26.95	15.23	31.8	10.2	1088.25	83.19	83.19
2019-01-16 14:45:00	9.32	31.61	11.84	29.59	13.97	25.37	14.94	31.99	10.16	1088.25	83.85	85.362
2019-01-16 15:00:00	8.49	36.34	10.87	33	12.59	29.86	13.47	35.02	10.09	1088.25	83.5	82.368
2019-01-16 15:15:00	8.04	39.17	10.04	34.72	11.34	30.7	11.97	35.45	10.12	1088.25	84.32	83.698
2019-01-16 15:30:00	8.71	38.29	11.09	34.29	12.31	30.04	13.25	34.94	10.11	1088.25	83.47	84.299
2019-01-16 15:45:00	9.77	34.85	12.21	32.87	14.21	28.52	15.09	33.2	10.12	1088.92	83.77	89.135
2019-01-16 16:00:00	9.93	34.06	12.38	29.83	13.81	26.54	14.72	32.74	9.98	1088.25	84.75	89.083
2019-01-16 16:15:00	10.45	30.03	12.87	28.46	14.51	24.02	15.57	30.34	10.04	1088.25	82.62	89.668
2019-01-16 16:30:00	9.32	32.39	11.3	28.1	12.88	24.15	13.73	30.3	10.05	1088.92	82.12	82.09
2019-01-16 16:45:00	9.23	35.66	12.08	34.88	13.25	30.91	14.1	35.08	10.14	1088.92	82.59	87.078
2019-01-16 17:00:00	9.01	41.03	11.75	36.97	13.03	32.52	14.07	36.45	10.12	1088.25	84.64	90.747
2019-01-16 17:15:00	8.72	32.76	10.84	30.13	12.05	25.83	12.65	33.1	9.94	1088.92	84.46	88.183
2019-01-16 17:30:00	9.02	31.54	11.26	28.76	12.98	25.27	13.66	31.79	9.97	1088.25	83.25	83.194
2019-01-16 17:45:00	8.9	33.67	11.09	32.05	12.29	29.06	12.82	35.14	10.2	1088.25	84.46	86.656
2019-01-16 18:00:00	8.94	39.38	11.65	35.97	12.65	32.75	13.36	38.65	10.08	1088.92	84.15	83.892
2019-01-16 18:15:00	8.98	42.84	11.32	39.59	12.57	36.06	13.01	41.16	10.1	1088.92	84.6	83.965
2019-01-16 18:30:00	9.02	42.12	12.23	38.46	14.07	34.62	14.95	39.2	10.16	1088.92	84.62	84.026
2019-01-16 18:45:00	8.56	45.76	11.35	43.68	12.36	38.98	13.46	42.63	10.17	1088.92	84.82	82.003
2019-01-16 19:00:00	8.22	38.24	10.3	35.23	11.68	31.4	12.4	37.57	10.2	1088.25	84.05	81.708
2019-01-16 19:15:00	10.34	34.31	13.16	31.31	15.07	27.52	15.83	33.23	10.21	1088.92	82.76	85.165
2019-01-16 19:30:00	8.99	39.4	11.78	36.16	12.93	31.09	13.61	35.21	10.23	1089.58	82.05	84.32
2019-01-16 19:45:00	10.19	31.7	12.33	29.55	13.93	25.82	15.02	31.77	10.27	1088.92	80.56	86.076
2019-01-16 20:00:00	8.11	34.96	10.33	32.58	11.63	29.64	12.62	35.59	10.24	1088.92	79.37	79.226
2019-01-16 20:15:00	8.75	42.26	11.4	38.58	12.47	34.46	13.38	40.41	10.55	1089.58	80.72	81.932
2019-01-16 20:30:00	9.15	45.35	11.68	43.6	12.62	39.24	13.24	42.85	10.43	1088.92	79.36	85.506
2019-01-16 20:45:00	8.84	44.09	11.73	41.38	12.93	37.26	13.91	42.16	10.36	1088.92	79.44	85.786
2019-01-16 21:00:00	9.1	41.88	11.6	36.68	12.99	34.78	13.69	40.01	10.44	1088.92	79.37	83.435
2019-01-16 21:15:00	9.1	41.88	11.6	36.68	12.99	34.78	13.69	40.01	10.44	1088.92	79.37	80.166
2019-01-16 21:30:00	9.1	41.88	11.6	36.68	12.99	34.78	13.69	40.01	10.44	1088.92	79.37	81.599
2019-01-16 21:45:00	9.1	41.88	11.6	36.68	12.99	34.78	13.69	40.01	10.44	1088.92	79.37	78.879
2019-01-16 22:00:00	9.1	41.88	11.6	36.68	12.99	34.78	13.69	40.01	10.44	1088.92	79.37	83.82
2019-01-16 22:15:00	9.1	41.88	11.6	36.68	12.99	34.78	13.69	40.01	10.44	1088.92	79.37	84.245
2019-01-16 22:30:00	9.1	41.88	11.6	36.68	12.99	34.78	13.69	40.01	10.44	1088.92	79.37	85.797
2019-01-16 22:45:00	9.1	41.88	11.6	36.68	12.99	34.78	13.69	40.01	10.44	1088.92	79.37	87.209
2019-01-16 23:00:00	9.1	41.88	11.6	36.68	12.99	34.78	13.69	40.01	10.44	1088.92	79.37	88.222
2019-01-16 23:15:00	9.1	41.88	11.6	36.68	12.99	34.78	13.69	40.01	10.44	1088.92	79.37	86.948
2019-01-16 23:30:00	9.1	41.88	11.6	36.68	12.99	34.78	13.69	40.01	10.44	1088.92	79.37	85.752
2019-01-16 23:45:00	9.1	41.88	11.6	36.68	12.99	34.78	13.69	40.01	10.44	1088.92	79.37	81.709
2019-01-17	9.1	41.88	11.6	36.68	12.99	34.78	13.69	40.01	10.44	1088.92	79.37	80.729
2019-01-17 00:15:00	9.11	41.78	11.55	39.33	12.36	35.98	13.11	41.14	10.42	1088.92	77.98	84.389
2019-01-17 00:30:00	8.81	42.3	11.37	38.29	12.81	36.44	13.83	42.04	10.42	1088.92	79.55	81.946
2019-01-17 00:45:00	8.83	40.46	10.87	40.77	12.12	36.77	12.9	42.36	10.26	1088.92	79.16	84.395
2019-01-17 01:00:00	8.94	39.87	11.38	39.57	12.73	37.76	13.26	42.78	10.23	1088.92	79.33	85.161
2019-01-17 01:15:00	7.82	41.2	9.94	37.41	10.88	34.45	11.03	42.07	10.32	1088.92	79.62	78.94
2019-01-17 01:30:00	8.9	43.5	11.69	40.54	12.89	38.18	13.43	42.47	10.17	1088.92	78.91	79.094
2019-01-17 01:45:00	7.84	45.64	11.09	44.78	11.99	40.13	12.58	42.63	10.24	1089.58	79.33	75.058
2019-01-17 02:00:00	7.6	39.24	10.15	40.16	11.18	37.58	12.16	43.5	10.21	1088.92	77.31	72.523
2019-01-17 02:15:00	7.64	40.43	10.04	40.49	11.3	38.57	11.82	43.21	10.11	1088.92	76.78	75.581
2019-01-17 02:30:00	7.73	38.91	9.92	38.75	11.02	36.01	11.44	42.98	10.13	1088.92	76.65	78.285
2019-01-17 02:45:00	8.53	46.82	11.06	41.1	12.04	38.6	12.75	43.97	10.14	1088.92	77.84	77.395
2019-01-17 03:00:00	8.11	46.69	10.32	42.45	10.87	39.69	11.16	44.44	10.11	1088.92	77.39	74.801
2019-01-17 03:15:00	8.11	43.42	10.84	42.52	11.88	39.35	12.46	43.6	10.2	1088.92	77.47	78.204
2019-01-17 03:30:00	8.36	41.76	10.46	37.69	11.4	35.31	11.91	39.56	10.08	1088.25	77.43	79.174
2019-01-17 03:45:00	9	45.54	11.81	42.79	12.82	40.43	13.49	44.78	10.15	1088.92	77.27	80.09
2019-01-17 04:00:00	7.87	45.64	10.42	43.5	11.32	39.87	12.04	44.29	10.22	1088.92	76.79	81.281
2019-01-17 04:15:00	7.52	39.59	9.62	36.94	10.78	34.22	11.46	39.14	10.18	1088.25	77.14	80.977
2019-01-17 04:30:00	8.82	42.56	11.37	39.98	12.75	39.28	13.62	44.23	10.24	1088.92	78.24	81.841
2019-01-17 04:45:00	8.58	39.82	11.28	36.02	12.56	35.69	13.08	41.46	10.23	1088.92	77.62	78.426
2019-01-17 05:00:00	7.97	43.81	10.82	40.12	12.05	38.73	12.63	43.96	10.23	1088.92	78.34	78.276
2019-01-17 05:15:00	8.59	39.11	10.91	35.08	12.18	35.12	12.92	41.04	10.12	1088.92	75.87	75.666
2019-01-17 05:30:00	7.44	37.08	9.56	32.5	10.66	32.97	11.16	40.69	10.19	1088.92	76.2	68.98
2019-01-17 05:45:00	9.19	41.29	11.62	35.77	12.58	34.34	12.88	39.66	10.2	1088.92	76.99	69.563
2019-01-17 06:00:00	8.41	32.8	10.16	29.95	11.09	28.57	12.04	34.69	10.36	1088.92	76.82	72.452
2019-01-17 06:15:00	8.45	43.49	10.71	38.44	12.19	36.67	13.15	39.99	10.23	1089.58	76.23	72.682
2019-01-17 06:30:00	8.75	34.98	10.7	29.24	12.06	27.17	12.73	33.54	10.14	1088.92	75.73	69.804
2019-01-17 06:45:00	7.85	41.19	9.92	35.6	10.96	34.11	11.39	36.89	10.27	1088.92	76.8	69.367
2019-01-17 07:00:00	7.8	47.34	10.28	41.86	11.11	39.17	11.49	41.01	10.29	1088.92	76.09	62.913
2019-01-17 07:15:00	8.28	50.45	10.58	44.6	11.47	40.95	11.97	44.8	10.36	1088.92	77.22	60.438
2019-01-17 07:30:00	6.69	43.9	8.92	39.3	9.76	36.74	10.61	41.68	10.33	1088.92	76.72	58.42
2019-01-17 07:45:00	7.81	35.97	9.5	30.44	10.38	30.47	10.74	36.41	10.51	1088.92	75.41	61.362
2019-01-17 08:00:00	6.99	35.49	8.52	28.96	9.47	27.95	9.91	33.57	10.65	1088.92	71.64	50.901
2019-01-17 08:15:00	6.77	42.29	8.72	39.95	9.34	37.36	9.75	42.41	10.76	1088.92	68.47	49.102
2019-01-17 08:30:00	6.9	42.77	8.63	40.28	9.6	37.39	10.34	41.73	10.65	1089.58	71.67	50.257
2019-01-17 08:45:00	6.77	44.7	8.84	40.65	9.36	37.49	9.86	42.51	10.54	1088.92	73.63	54.082
2019-01-17 09:00:00	7.42	43.61	9.31	38.73	10.07	37.34	10.58	41.17	10.69	1088.92	73.87	58.227
2019-01-17 09:15:00	7.12	44.97	9.39	40.89	10.14	39.42	10.47	43.71	10.61	1088.92	74.99	52.242
2019-01-17 09:30:00	7.61	42.47	9.68	37.76	10.59	34.47	11.46	40.01	10.61	1088.92	75.25	54.807
2019-01-17 09:45:00	7.7	41.94	10.07	37.17	11.2	35.72	11.5	40.41	10.67	1088.92	76.87	57.331
2019-01-17 10:00:00	6.93	36.72	8.13	32.48	8.96	30.62	9.62	36.63	10.67	1088.92	75.95	53.37
2019-01-17 10:15:00	6.75	39.1	8.54	35.41	9.59	33.21	10.29	37.26	10.71	1088.92	74.97	49.319
2019-01-17 10:30:00	7.67	31.71	9.72	28.52	10.93	26.94	11.56	31.65	10.71	1088.92	73.57	47.127
2019-01-17 10:45:00	7.06	39.19	8.85	35.02	9.9	33.96	10.32	37.26	10.98	1088.92	74.42	45.48
2019-01-17 11:00:00	7.19	42.54	9.4	39.91	9.94	37.38	10.06	38.91	10.99	1088.92	73.67	42.705
2019-01-17 11:15:00	7.12	44.1	9.36	41.01	10.1	38.63	10.31	43.31	11.06	1088.92	75.58	42.133
2019-01-17 11:30:00	7.14	44.41	9.39	38.42	10.05	36.18	10.5	40.97	10.97	1088.92	76.3	44.222
2019-01-17 11:45:00	7.21	39.65	9.38	36.97	10.24	35.59	10.7	39.9	10.85	1088.92	76.17	50.038
2019-01-17 12:00:00	6.76	44	9.08	41.2	9.92	38.99	10.41	42.24	11.01	1088.92	77.79	51.885
2019-01-17 12:15:00	6.68	40.98	8.61	35.08	9.69	35.12	10.19	39.49	10.88	1088.25	76.04	55.831
2019-01-17 12:30:00	7.36	41.98	9.82	39.03	10.84	37.11	11.54	40.89	11.43	1088.92	74.87	54.523
2019-01-17 12:45:00	8.05	42.52	9.99	39.25	10.87	38.46	11.19	41.71	11.23	1088.92	73.74	54.342
2019-01-17 13:00:00	7.76	42.61	9.89	36.52	10.6	34.09	11.22	38.93	11.59	1088.92	75.08	55.127
2019-01-17 13:15:00	7.2	41.03	9.04	19.85	10	34.7	10.57	40.03	11.57	1088.92	74.43	55.746
2019-01-17 13:30:00	7.17	47.76	9.51	14.56	9.84	40.99	9.95	44.64	11.3	1088.92	74.41	58.466
2019-01-17 13:45:00	6.96	41.56	8.73	38.1	9.6	38.53	10.13	47.38	11.46	1088.92	73.81	54.614
2019-01-17 14:00:00	7.79	40.28	9.87	24.52	10.9	35.38	11.46	41.44	11.58	1088.92	73.71	58.312
2019-01-17 14:15:00	7.31	47.76	9.75	40.88	10.25	42.14	10.52	47.4	11.68	1088.92	74.85	60.016
2019-01-17 14:30:00	7.44	49.3	10.24	46.14	10.7	44.08	10.72	49.2	11.31	1088.92	73.01	57.028
2019-01-17 14:45:00	6.99	57.93	9.65	52.32	10.11	45.99	9.97	51.64	11.27	1088.25	73.54	57.195
2019-01-17 15:00:00	7.94	44.79	10.11	26.83	10.9	41.37	10.84	48.96	11.45	1088.25	72.88	56.404
2019-01-17 15:15:00	6.58	52.68	9.18	47.49	9.7	45.33	9.5	53.22	11.59	1088.92	71.95	53.062
2019-01-17 15:30:00	6.11	49.41	8.93	47.11	9.55	44.85	9.65	51.44	11.39	1088.92	70.88	54.056
2019-01-17 15:45:00	6.07	48.1	8.85	48.34	9.72	46.56	9.48	53.19	11.45	1089.58	72.91	54.147
2019-01-17 16:00:00	6.84	60.56	9.65	54.29	10.36	50.31	10.37	56.5	11.54	1088.92	72.98	52.427
2019-01-17 16:15:00	6.49	57.4	9.41	30.34	10.1	47.52	10.08	53.48	11.42	1088.92	72.98	50.665
2019-01-17 16:30:00	6.5	62.18	9.32	55.46	10.14	51.41	10.21	57.43	11.28	1088.92	71.58	50.972
2019-01-17 16:45:00	6.14	63.71	9.18	56.18	9.91	51.63	10.18	58.77	11.53	1088.92	71.35	50.965
2019-01-17 17:00:00	7.21	59.78	10.27	45.29	11.5	50.69	11.82	58.86	11.44	1088.92	70.96	59.011
2019-01-17 17:15:00	7.71	69.98	10.44	21.29	11.3	54.71	11.63	61.2	11.41	1088.92	70.6	59.649
2019-01-17 17:30:00	7.58	70.87	9.97	51.92	10.6	56.03	10.73	63.7	11.45	1088.25	71.92	61.493
2019-01-17 17:45:00	7.35	70.85	10.16	60.8	10.9	56.22	11.01	62.22	11.18	1088.92	69.52	59.832
2019-01-17 18:00:00	7.93	67.36	10.54	19.69	11.07	54.67	11.28	60.6	11.4	1088.92	69.97	59.754
2019-01-17 18:15:00	6.83	62.41	9.47	26.54	10.21	50.9	10.47	55.69	11.4	1088.25	67.3	59.868
2019-01-17 18:30:00	7.08	48.95	9.53	20.46	10.38	42.85	10.45	49.47	11.42	1088.92	65.32	62.04
2019-01-17 18:45:00	7.62	59.83	10.15	23.04	10.94	49.67	10.82	55.35	11.46	1088.92	66.02	56.859
2019-01-17 19:00:00	7.6	44.17	10.08	40.59	11.21	38.43	11.77	44.06	11.69	1088.92	64.71	58.418
2019-01-17 19:15:00	7.17	42.48	9.12	38.19	10.13	37.48	10.56	42.84	11.66	1088.92	63.32	59.931
2019-01-17 19:30:00	7.8	48.56	10.19	43.29	11.06	39.99	12.17	43.79	11.84	1088.92	61.72	60.739
2019-01-17 19:45:00	7.28	43.32	9.34	38.65	10.23	37.53	10.82	42.6	11.92	1088.92	60.56	63.607
2019-01-17 20:00:00	6.77	43.1	9.22	41.03	10.11	38.48	10.76	43.32	11.88	1089.58	63.22	65.814
2019-01-17 20:15:00	6.91	47.74	9.58	41.96	10.49	39.34	10.95	44.92	11.82	1088.92	66.59	65.163
2019-01-17 20:30:00	7.52	42.91	9.87	38.74	10.65	37.94	11.2	44.01	11.73	1088.92	69.61	65.012
2019-01-17 20:45:00	7.59	41.18	9.8	38.83	10.81	37.54	11.41	41.83	11.8	1088.92	70.75	66.544
2019-01-17 21:00:00	7.61	40.53	9.4	34.81	10.31	36.78	10.66	43.54	11.76	1088.92	70.56	63.754
2019-01-17 21:15:00	7.29	41.54	9.49	36.92	10.78	37	12.03	42.31	11.93	1089.58	68.95	66.553
2019-01-17 21:30:00	7.56	42.51	9.95	38.81	11.16	36.48	11.95	41.75	11.99	1088.92	67.64	65.856
2019-01-17 21:45:00	7.86	38.98	10.14	35.37	11.07	35.1	11.49	42.82	12.3	1088.92	66.49	65.963
2019-01-17 22:00:00	7.74	44.61	10.02	38.27	10.93	38.11	11.31	45.11	12.32	1088.92	63.95	64.67
2019-01-17 22:15:00	6.8	49.31	10.02	44.23	11.06	43.78	11.5	52	12.46	1088.92	62.44	69.604
2019-01-17 22:30:00	6.16	49.17	9.07	45.9	9.8	44.5	10.13	51.08	12.52	1088.92	64.2	69.302
2019-01-17 22:45:00	6.7	53.6	10.19	49.23	11.16	46.7	11.37	54.18	12.43	1089.58	63.23	66.979
2019-01-17 23:00:00	7.22	67.08	9.85	54.07	10.85	52.28	11.1	58.94	12.42	1088.92	65.78	66.034
2019-01-17 23:15:00	6.84	62.65	9.67	51.35	10.27	49.86	10.61	56.86	12.39	1088.92	64.97	66.064
2019-01-17 23:30:00	6.62	54.25	10.62	51.21	11.52	47.76	11.67	53.77	12.39	1089.58	63.54	56.174
2019-01-17 23:45:00	7.05	54.85	10.73	48.14	11.73	46.28	12.05	53.17	12.38	1088.92	64.72	57.184
2019-01-18	6.34	34.76	7.71	28.25	8.61	27.98	9.57	33.84	11.78	1088.92	72.72	56.759
2019-01-18 00:15:00	6.25	36.12	8.32	30.47	9.46	30.25	10.43	36.04	11.7	1088.92	73.17	55.939
2019-01-18 00:30:00	6.31	36.4	8.15	32.33	9.14	32.58	9.57	38.63	11.63	1088.92	70.46	53.461
2019-01-18 00:45:00	6.97	42.04	9.53	39.11	10.54	38.77	10.83	44.18	11.66	1089.58	69.54	59.185
2019-01-18 01:00:00	8.01	38.34	10.06	34.64	11.37	35.34	12.25	41.3	11.45	1088.92	69.8	64.334
2019-01-18 01:15:00	7.08	42.12	9.25	36.12	10.37	35.9	11.12	40.09	11.33	1088.92	70.22	60.246
2019-01-18 01:30:00	7.59	38.22	9.89	33.91	11.08	32.42	11.65	37.3	11.24	1088.92	72.14	58.37
2019-01-18 01:45:00	7.24	35.11	9.15	30.74	10.22	29.89	10.98	36.36	11.16	1088.92	71.87	59.051
2019-01-18 02:00:00	7.53	33.7	9.8	28.7	11.37	27.36	12.53	32.58	11.14	1088.92	71.32	59.236
2019-01-18 02:15:00	7.14	38.06	9.32	30.46	10.74	27.79	11.76	32.97	11.14	1088.92	72.52	54.597
2019-01-18 02:30:00	7.22	32.82	9.28	26.44	10.49	26.32	11.79	31.88	11.19	1088.92	72.39	56.967
2019-01-18 02:45:00	7.05	33.72	8.97	27.43	10.24	26.68	11.37	32.01	11.13	1089.58	72.62	60.322
2019-01-18 03:00:00	7.74	38.23	10.49	31.01	11.66	29	12.55	34.15	11.11	1089.58	70.57	66.222
2019-01-18 03:15:00	7.6	41.33	9.55	32.46	10.83	32.39	11.65	36.65	11.08	1088.92	69.84	66.193
2019-01-18 03:30:00	7.87	38.38	10.06	29.55	11.63	29.57	12.68	34.59	10.99	1088.92	68.76	67.727
2019-01-18 03:45:00	8	35.35	10.27	29.57	11.88	30.04	12.99	36.31	10.95	1088.25	68.33	67.164
2019-01-18 04:00:00	8.31	35.67	10.18	29.79	11.51	28.01	12.6	33.66	10.86	1088.92	70.21	64.519
2019-01-18 04:15:00	8.56	35.01	10.69	28.26	12.47	26.99	13.67	33.24	10.88	1089.58	70.8	62.452
2019-01-18 04:30:00	7.67	34.53	10.05	28.33	11.15	26.51	12.26	32.94	10.84	1088.92	70.3	62.968
2019-01-18 04:45:00	6.63	38.15	8.79	30.78	10.06	28.04	11.36	34	10.86	1088.25	69.39	62.738
2019-01-18 05:00:00	7.68	36	9.99	27.38	11.48	26.56	12.47	31.78	10.88	1088.92	68.72	63.178
2019-01-18 05:15:00	8.42	32.69	10.59	26.85	12.04	26.79	13.17	30.62	10.82	1088.92	70.4	64.937
2019-01-18 05:30:00	8.25	36.99	10.5	27.72	11.77	27.31	12.68	30.76	10.8	1088.92	70.9	63.548
2019-01-18 05:45:00	8.14	34.09	9.94	27.51	11.08	26.59	12.27	32.39	10.72	1088.92	71.38	65.133
2019-01-18 06:00:00	7.69	33.71	9.64	26.38	11.18	26.86	12.56	31.81	10.75	1089.58	71.79	63.196
2019-01-18 06:15:00	8.8	34.35	11.01	27.66	12.43	26.72	13.42	31.91	10.72	1088.92	72.37	58.606
2019-01-18 06:30:00	8.74	31.11	10.91	24.57	12.16	23.44	13.49	28.12	10.53	1089.58	72.78	65.909
2019-01-18 06:45:00	8.83	25.71	10.26	21.23	11.47	20.5	12.66	26.05	10.47	1088.92	73.19	66.937
2019-01-18 07:00:00	9.44	26.97	11.08	21.68	12.39	19.7	13.67	27.38	10.55	1088.92	73.74	65.198
2019-01-18 07:15:00	8.48	32.93	10.17	24.78	11.26	23.26	12.56	28.31	10.54	1088.92	74.79	67.584
2019-01-18 07:30:00	9.26	30.71	11.33	25.43	12.56	24.07	13.98	30.59	10.49	1088.92	73.94	67.396
2019-01-18 07:45:00	8.76	32.97	10.92	25.51	12.42	24.56	13.59	31.04	10.51	1089.58	73.05	68.325
2019-01-18 08:00:00	8.89	33.88	11.17	27.19	12.54	25.44	13.6	30.32	10.71	1088.92	73.37	68.917
2019-01-18 08:15:00	9.46	29.63	11.35	25.11	12.62	22.35	13.64	28.22	10.79	1088.92	71.91	70.869
2019-01-18 08:30:00	8.56	36.24	10.78	28.22	11.72	25.01	12.32	29.05	10.97	1088.92	70.79	66.84
2019-01-18 08:45:00	8.72	31.92	10.64	26.41	11.64	23.54	12.45	29.39	11.15	1088.92	69.68	68.082
2019-01-18 09:00:00	9.14	32.29	11.1	26.66	12.55	22.73	13.93	29.63	11.22	1088.92	69	64.573
2019-01-18 09:15:00	9.11	30.69	10.96	25.67	12.06	23.51	12.94	30.4	11.22	1088.92	68.38	63.484
2019-01-18 09:30:00	8.68	29.63	10.06	23.98	10.84	19.59	11.91	26.33	11.43	1088.92	67.37	62.225
2019-01-18 09:45:00	9.98	27.35	10.95	21.83	12.01	18.6	12.73	24.56	11.52	1088.25	67.07	61.764
2019-01-18 10:00:00	8.89	32.86	10.91	25.9	12.04	23.3	13.01	28.64	11.54	1088.92	67.03	60.88
2019-01-18 10:15:00	8.45	31.13	10.05	26.31	11.08	25.73	11.94	30.47	11.63	1088.92	65.82	66.113
2019-01-18 10:30:00	8.12	36.9	10.74	29.91	12.17	28.23	12.66	32.26	11.75	1088.25	65.41	64.5
2019-01-18 10:45:00	8.94	28.42	10.75	24.27	12.32	23.48	13.23	30.28	11.83	1088.25	65.23	65.837
2019-01-18 11:00:00	8.49	35.67	10.45	29.28	11.76	27.27	12.48	31.17	11.93	1088.92	64.78	66.525
2019-01-18 11:15:00	7.84	34.66	9.99	28.13	11.31	25.53	11.97	31.56	12.09	1088.92	66.41	67.661
2019-01-18 11:30:00	8.3	32.51	10.35	25.41	11.86	24.18	12.79	29.85	12.28	1088.92	65.57	66.849
2019-01-18 11:45:00	8.77	30.54	11.18	24.91	12.55	22.1	13.14	28.89	12.18	1088.92	64.86	66.919
2019-01-18 12:00:00	7.68	36.38	9.5	29.14	10.7	28.14	11.55	31.81	12.43	1088.92	65.43	64.79
2019-01-18 12:15:00	7.8	34.48	9.71	28.15	10.81	27.92	11.9	31.84	12.54	1088.92	65.69	64.872
2019-01-18 12:30:00	7.24	39.1	8.81	32.85	9.48	31.3	9.74	36.47	12.64	1088.92	64.89	60.149
2019-01-18 12:45:00	7.28	36.52	9.04	31.15	9.74	29.93	10.6	34.98	12.77	1088.92	63.77	63.281
2019-01-18 13:00:00	8.1	32.95	9.99	26.98	10.92	27.11	11.41	31.28	12.76	1088.92	64.07	60.913
2019-01-18 13:15:00	7.49	34.06	8.89	27.67	9.84	25.07	10.81	29.42	12.89	1088.25	63.6	60.854
2019-01-18 13:30:00	9.46	32.91	11.5	26.91	12.72	23.86	13.63	27.81	12.87	1088.25	63.34	63.415
2019-01-18 13:45:00	9.31	34.29	11.22	26.87	12.94	26.7	14.21	31.55	13.08	1088.92	61.98	60.821
2019-01-18 14:00:00	7.71	30.55	9.44	25.08	10.58	24.37	11.41	29.95	13.43	1088.92	61.31	46.844
2019-01-18 14:15:00	6.51	36.83	8.01	31.24	8.7	32.38	9.23	35.57	13.8	1088.92	60.76	41.686
2019-01-18 14:30:00	6.67	40.73	8.27	34.56	8.86	33.37	9.51	36.98	13.88	1088.25	62.04	41.094
2019-01-18 14:45:00	7.67	31.28	9.42	25.31	10.15	23.04	10.65	28.51	14.04	1088.92	62.51	39.336
2019-01-18 15:00:00	7.64	30.42	9.44	23.64	10.29	24.39	10.8	29.23	14.02	1088.92	61.44	44.558
2019-01-18 15:15:00	6.69	33.56	8.21	27.26	9.23	23.57	9.86	27.06	13.9	1088.25	62.16	42.149
2019-01-18 15:30:00	7.75	31.59	10.05	5.05	10.86	24.6	11.44	29.87	13.89	1088.92	62.16	44.691
2019-01-18 15:45:00	7.25	32.03	9	23.61	9.84	21.14	10.76	24.74	14.09	1088.25	62.02	38.171
2019-01-18 16:00:00	7.28	29.69	9.18	25.3	10.33	24.21	11.12	27.31	13.9	1088.25	62.45	39.289
2019-01-18 16:15:00	6.27	27.68	6.86	22.11	7.51	18.3	8.46	22.54	14.04	1088.25	62.75	32.936
2019-01-18 16:30:00	6.15	26.02	6.92	21.31	7.59	20.97	8.46	27.09	13.94	1088.25	63.68	33.748
2019-01-18 16:45:00	5.63	38.48	7.45	20.11	8.6	25.23	9.28	27.55	13.82	1088.25	63.53	32.392
2019-01-18 17:00:00	5.55	38.51	6.7	31.79	7.28	29.19	7.79	30.4	13.77	1088.25	63.92	28.285
2019-01-18 17:15:00	5.58	35.8	7.18	27.4	7.95	26.36	8.88	32.07	13.69	1089.58	64.32	30.392
2019-01-18 17:30:00	5.43	32.54	6.36	28.15	7.41	27.04	8.68	29.75	13.53	1088.25	65.76	28.412
2019-01-18 17:45:00	5.15	30.75	6.53	22.88	7.22	22.81	8.45	29.8	13.59	1088.92	64.83	24.991
2019-01-18 18:00:00	5.64	33.4	6.72	9.97	7.64	26.47	8.65	30.12	13.68	1088.92	64.77	23.162
2019-01-18 18:15:00	5.65	32.06	6.8	26	7.82	24.02	8.85	29.96	13.58	1088.92	66.45	24.276
2019-01-18 18:30:00	5.27	33.04	6.79	28.33	7.45	25.73	8.32	29.59	13.59	1088.25	68.17	25.417
2019-01-18 18:45:00	5.84	33.12	7.27	27.99	8.27	27.34	9.32	33.13	13.47	1088.92	69.31	35.839
2019-01-18 19:00:00	5.54	37.85	6.96	31.51	8.29	29.46	9.7	33.85	13.39	1088.25	69.55	36.402
2019-01-18 19:15:00	4.77	30.88	5.84	27.17	6.45	25.68	7.73	30.82	13.41	1088.25	70.28	29.393
2019-01-18 19:30:00	4.82	26.3	5.84	23.45	6.38	23.09	7.67	29.1	13.39	1088.25	68.66	25.508
2019-01-18 19:45:00	4.94	24.63	5.82	21.29	6.66	18.92	7.96	27.57	13.31	1088.92	68.68	20.164
2019-01-18 20:00:00	4.69	25.54	5.35	22.53	6.12	21.25	7.33	28.53	13.22	1088.92	68.77	18.289
2019-01-18 20:15:00	4.12	33.95	4.98	29.14	5.73	26.05	7.19	31.98	13.36	1088.25	69.59	18.319
2019-01-18 20:30:00	5.21	37.85	6.91	33.29	7.88	31.16	8.71	35.71	13.32	1088.25	69.3	18.051
2019-01-18 20:45:00	5.21	28.16	5.97	24.49	6.82	24.03	8.06	32.08	13.14	1088.92	70.42	15.283
2019-01-18 21:00:00	5.85	27.73	6.76	22.47	7.6	21.1	8.86	27.24	13.19	1088.92	71.32	14.951
2019-01-18 21:15:00	4.5	28.21	5.61	23.47	6.71	22.45	8.04	27.24	13.1	1088.25	72.51	16.149
2019-01-18 21:30:00	4.67	28.97	6.27	24.47	7.13	22.05	8.68	27.35	13.05	1088.25	72.01	14.589
2019-01-18 21:45:00	4.66	28.95	5.78	23.86	6.69	22.25	8.43	27.9	13.03	1088.92	72.23	16.989
2019-01-18 22:00:00	5.01	28.3	6.12	22.08	6.88	17.7	8.4	22.66	13.22	1088.25	71.73	18.938
2019-01-18 22:15:00	6.07	23.94	7.27	18.14	8.03	13.32	9.24	19.55	13.41	1088.92	66.13	16.152
2019-01-18 22:30:00	5.42	25.86	6.71	21.1	7.7	17.12	8.89	22.46	13.29	1088.92	67	13.045
2019-01-18 22:45:00	3.47	19.86	4.34	13.08	5.11	9.6	6.39	16.11	13.43	1088.92	66.7	7.731
2019-01-18 23:00:00	3.57	13.01	4.53	7.62	5.18	5.28	6.57	11.42	13.69	1088.92	66.59	4.313
2019-01-18 23:15:00	3.07	14.63	3.82	11.08	4.71	9.59	5.81	15.75	13.62	1088.25	67.19	4.876
2019-01-18 23:30:00	3.28	18.08	4.17	11.44	5.39	8.75	6.67	15.21	13.69	1088.92	67.13	5.301
2019-01-18 23:45:00	3.42	35.15	4.88	28.01	6.08	24.16	7.84	29.18	13.63	1088.25	69.44	6.318
2019-01-19	4.34	24.65	5.36	21.09	6.42	17.49	8.21	22.24	13.64	1089.58	70.07	5.892
2019-01-19 00:15:00	3.4	24.49	4.24	18.83	5.29	13.87	6.9	20.14	13.54	1089.58	71.72	5.159
2019-01-19 00:30:00	3.34	25.54	4.18	21.28	5.58	18.94	7.33	24.13	13.47	1088.92	73.06	5.681
2019-01-19 00:45:00	3.46	29.92	4.82	26.34	6.16	24.52	8.18	28.18	13.54	1089.58	73.07	8.872
2019-01-19 01:00:00	4.16	21.19	5.05	20.81	6.38	19.13	8.04	23.41	13.52	1088.92	74.33	7.631
2019-01-19 01:15:00	3.15	20.66	4.39	10.9	5.49	10.16	6.93	15.24	13.17	1088.92	71.96	5.679
2019-01-19 01:30:00	2.3	327.8	2.77	354.03	3.47	6.33	5.33	16.48	12.89	1089.58	75.41	4.947
2019-01-19 01:45:00	2.71	316.68	3.27	334.09	3.31	351.45	4.48	5.31	12.6	1088.92	76.86	4.458
2019-01-19 02:00:00	2.58	314.71	3.26	329.92	3.32	344.45	4.41	2.64	12.6	1088.92	75.29	4.729
2019-01-19 02:15:00	1.62	337.08	2.76	339.43	3.42	346.9	4.62	1.47	12.3	1088.25	76.46	2.967
2019-01-19 02:30:00	1.14	17.46	2.89	21.43	4.27	20.96	5.78	31.03	12.33	1088.25	78.21	3.48
2019-01-19 02:45:00	1.43	25.58	3.41	26.36	3.85	23.83	5.48	31.44	12.49	1088.25	77.17	5.098
2019-01-19 03:00:00	0.78	2.95	2.28	19.64	3.54	26.1	5.48	32.1	12.97	1088.25	75.46	3.185
2019-01-19 03:15:00	1.1	336.45	1.6	339.74	1.89	8.45	3.58	27.58	13.44	1088.92	73.3	2.398
2019-01-19 03:30:00	0.12	353.34	0.04	333.33	0.08	351.69	2.11	20.2	13.36	1088.92	72.37	1.059
2019-01-19 03:45:00	0	353.36	0.28	33.12	0.03	15.94	2.35	45.15	12.89	1088.92	72.75	0.081
2019-01-19 04:00:00	0.52	341.41	1.46	337.41	0.74	5.51	2.36	32.43	12.83	1088.92	75.35	-0.641
2019-01-19 04:15:00	2.1	307.33	1.73	314.45	1.94	324.92	2.62	359.05	13.09	1088.92	72.67	-0.674
2019-01-19 04:30:00	2.01	310.72	2.3	324.2	2.2	321.54	2.3	357.75	12.99	1088.92	72.73	0.172
2019-01-19 04:45:00	1.59	312.95	2.55	327.21	3.22	324.6	3.29	340.05	12.4	1088.92	74.54	0.101
2019-01-19 05:00:00	0.74	315.9	2.32	342.01	3.22	342.74	3.76	351.35	12.33	1088.92	76.13	0.463
2019-01-19 05:15:00	0	330.92	1.99	359.79	2.89	357.48	3.19	8.53	11.89	1088.92	76.57	0.63
2019-01-19 05:30:00	0	330.92	2.07	19.75	2.64	0.09	3.81	6.55	11.56	1088.92	79.85	0.406
2019-01-19 05:45:00	0.01	24.87	1.82	14.72	2.7	4.54	2.97	10.04	11.65	1088.92	79.48	0.408
2019-01-19 06:00:00	0	23.64	1.9	20.55	2.25	5.26	3.36	19.03	11.81	1088.92	79.45	-0.784
2019-01-19 06:15:00	0.44	20.88	1.24	21.22	2.37	11.25	3.06	32.35	12.47	1088.25	77.22	-1.067
2019-01-19 06:30:00	1.59	334.01	1.71	350.76	1.36	359.85	1.86	28.3	12.79	1088.92	74.82	-1.052
2019-01-19 06:45:00	0.99	316.14	1.67	0.12	1.73	16.56	2.07	44.32	12.35	1088.92	76.8	-1.003
2019-01-19 07:00:00	1.12	297.69	1.98	351.82	1.08	16.46	1.25	48.8	12.02	1088.92	77.95	-1.042
2019-01-19 07:15:00	0	179.2	0.01	322.68	0.72	16.47	1.2	49.88	11.89	1088.25	78.92	-1.019
2019-01-19 07:30:00	0	179.18	0	322.37	0.05	16	0.97	48.42	12.36	1088.92	78.71	-0.874
2019-01-19 07:45:00	0	179.18	0	319.9	0	16.01	1.35	50.69	13.59	1088.25	76.09	-0.822
2019-01-19 08:00:00	0	179.18	0.06	322.77	0.02	16.17	1.81	69.88	13.06	1088.25	76.08	-0.688
2019-01-19 08:15:00	0.48	231.04	0.35	318.22	0	16.14	1.96	39.17	13.43	1088.25	74.78	-0.538
2019-01-19 08:30:00	0.5	302.97	1.01	309.41	0.2	16.12	2.06	22.5	13.49	1088.25	75.88	-0.505
2019-01-19 08:45:00	0.73	329.26	0.84	305.98	1.19	314.42	1.41	15.4	13.92	1088.25	75.47	-0.483
2019-01-19 09:00:00	0.87	326.86	1.75	329.06	1.88	356.98	2.64	26.24	14.13	1088.25	74.82	-0.472
2019-01-19 09:15:00	0.35	349.38	1.14	21.9	1.64	16.41	2.87	24.98	14.92	1088.25	71.75	-0.208
2019-01-19 09:30:00	0.1	358.4	1.37	31.89	1.9	27.25	2.7	30.76	15.99	1088.25	64.98	-0.26
2019-01-19 09:45:00	2.31	85.95	2.49	16.22	2.48	51.02	3.1	42.59	15.47	1088.25	65.56	-0.484
2019-01-19 10:00:00	2	68.69	2.41	15.25	2.3	34.92	2.65	31.2	15.53	1088.25	66.71	-0.507
2019-01-19 10:15:00	2.87	65.33	3.26	16.37	3.47	39.12	3.77	40.73	15.51	1088.25	66.15	-0.319
2019-01-19 10:30:00	2.87	34.77	3.73	6.11	4.17	19.33	4.41	25.33	16.05	1088.25	62.71	0.231
2019-01-19 10:45:00	3.19	43.73	4.08	18.98	4.17	27.49	4.01	28.39	16.13	1088.25	62.15	1.368
2019-01-19 11:00:00	3.34	48.42	4.51	38.61	4.83	32.34	5.18	37.66	16.23	1088.25	61.14	1.476
2019-01-19 11:15:00	3.42	40.69	4.86	35.94	5.59	30.57	5.97	34.3	16.26	1088.25	60.92	2.741
2019-01-19 11:30:00	4.14	31.82	5.1	26.52	5.53	24.66	5.88	31.58	16.26	1088.25	60.7	6.151
2019-01-19 11:45:00	4.11	50.73	5.66	1.23	6.12	38.4	6.15	41.35	15.96	1088.25	62.35	8.274
2019-01-19 12:00:00	3.51	49.44	5.11	39.31	5.31	36.7	5.7	38.62	16.07	1088.92	63.27	8.833
2019-01-19 12:15:00	3.64	50.64	4.89	0.75	5.16	38.69	5.35	39.8	16.27	1088.25	61.65	10.086
2019-01-19 12:30:00	3.75	55.28	5.31	45.68	5.77	42.25	6.28	46.9	16.57	1088.25	60.91	9.102
2019-01-19 12:45:00	2.79	71.01	4.13	60.75	4.2	51.6	4.6	53.01	16.33	1088.25	63.33	6.735
2019-01-19 13:00:00	3.36	81.18	4.35	43.63	4.7	56.47	4.24	56.44	16.27	1088.25	63.44	6.488
2019-01-19 13:15:00	2.89	84.84	3.99	67.66	4.35	57.35	4.56	63.42	16.44	1088.25	64.51	6.936
2019-01-19 13:30:00	3.21	70.15	4.35	2.38	4.62	49.66	4.76	53.57	17.36	1088.25	60.99	6.071
2019-01-19 13:45:00	3.96	43.89	5.38	44.25	5.57	41.75	5.41	53.06	17.54	1088.92	60.35	6.591
2019-01-19 14:00:00	4.01	42.03	5.28	42.85	5.56	41.25	5.86	49.99	17.69	1087.58	61.44	7.323
2019-01-19 14:15:00	3.74	69.8	4.73	56.47	4.82	53.53	5.02	57.11	17.53	1088.25	62.28	7.07
2019-01-19 14:30:00	3.32	72.09	4.14	59.5	4.67	54.87	4.97	67.42	17.54	1088.25	62.37	5.588
2019-01-19 14:45:00	3.76	73.72	4.42	58.39	4.36	53.09	4.26	69.62	17.66	1088.25	62.27	3.335
2019-01-19 15:00:00	3.22	76.3	3.68	66.08	4.01	62.95	4.15	83.02	17.23	1088.25	64.71	2.094
2019-01-19 15:15:00	2.02	65.97	2.87	60.99	2.86	62.59	3.7	79.15	17.72	1087.58	64.57	1.174
2019-01-19 15:30:00	2.32	71.74	3.22	20.62	3.4	61.46	4.51	78.61	17.57	1088.25	65.17	1.935
2019-01-19 15:45:00	2.87	79.03	3.3	13.51	3.43	65.38	4	75.71	17.72	1087.58	65.24	1.678
2019-01-19 16:00:00	2.38	63.51	3.65	12.45	4.05	56.29	4.92	70.45	17.31	1088.25	66.22	2.035
2019-01-19 16:15:00	2.41	73.72	3.6	24.48	3.92	58.64	4.5	71.2	17.06	1088.25	66.96	0.96
2019-01-19 16:30:00	2.15	63.73	2.85	50.22	3.25	60.52	3.96	78.8	16.9	1087.58	68.68	0.54
2019-01-19 16:45:00	2.55	80.82	3.05	21.24	3.56	77.67	4.05	91.24	16.64	1087.58	71.83	0.742
2019-01-19 17:00:00	1.91	74.38	3.08	39.12	3.55	69.49	3.98	85.63	16.4	1087.58	71.41	0.371
2019-01-19 17:15:00	1.69	89.91	2.21	81.64	2.67	101.97	4.34	107.51	15.78	1087.58	73.4	0.178
2019-01-19 17:30:00	0.19	96.26	1.36	104.57	3.1	98.23	3.47	109.43	15.31	1088.25	74.95	-0.676
2019-01-19 17:45:00	0.34	130.93	2.16	105.22	3.7	103.59	3.23	125.7	15.22	1087.58	75.18	-0.526
2019-01-19 18:00:00	2.28	165.12	3.51	160.13	4.25	157.02	4.35	165.1	14.99	1088.25	75.62	-0.234
2019-01-19 18:15:00	2	176.55	3.25	161.27	4.25	146.42	4.55	144.95	15.09	1088.25	74.06	-0.87
2019-01-19 18:30:00	1.45	175.85	2.94	165.69	3.58	150.58	3.38	147.6	15.14	1088.25	73.18	-0.869
2019-01-19 18:45:00	0.3	199.95	1.23	183.77	1.94	150.95	1.58	139.75	15.24	1088.25	72.99	-1.158
2019-01-19 19:00:00	0.34	232.42	0.53	170.12	0	152.64	0.75	139.58	15.24	1088.25	74.85	-1.097
2019-01-19 19:15:00	0	0.56	0	170.13	0	152.63	0.22	142.49	14.91	1088.92	75.85	-1.067
2019-01-19 19:30:00	0.21	332.13	1.15	330.12	0.26	3.29	0.14	140.96	14.77	1088.25	77.11	-1.04
2019-01-19 19:45:00	1.73	326.51	2.99	333.44	2.72	330.35	2.12	340.41	14.8	1088.25	78.54	-0.815
2019-01-19 20:00:00	1.89	322.37	2.85	340.35	2.33	324.79	0.13	325.27	14.87	1087.58	76.96	-0.78
2019-01-19 20:15:00	2.34	317.77	3.39	330.22	2.63	320.16	1.04	325.68	14.98	1088.25	75.95	-0.775
2019-01-19 20:30:00	1.54	307.96	2.53	321.14	2.44	325.17	0.46	326.08	14.92	1088.25	76.09	-0.562
2019-01-19 20:45:00	0.83	305.53	2.06	321.76	2.07	323.24	0.93	326.08	14.9	1088.25	75.57	-0.544
2019-01-19 21:00:00	1.94	312.25	2.68	317.64	2.55	311.03	1.34	329.29	15.02	1088.92	74.71	-0.54
2019-01-19 21:15:00	0.79	307.08	1.84	311.32	2.32	313.12	1.77	320.91	15.16	1088.25	72.97	-0.545
2019-01-19 21:30:00	0.89	314.11	1.86	325.74	2.41	325.24	2.02	323.9	14.94	1088.25	73.6	-0.544
2019-01-19 21:45:00	0.39	346.19	1.81	334.27	2.07	334.36	2.4	335.85	14.87	1088.25	73.57	-0.538
2019-01-19 22:00:00	2.23	322.01	2.72	329.42	2.8	333.14	3.5	348	14.93	1088.25	72.95	0.125
2019-01-19 22:15:00	2.38	308.2	3.31	320.01	3.58	320.09	4.68	328.6	14.78	1088.25	72.79	-0.052
2019-01-19 22:30:00	1.76	306.22	2.67	313.1	3.15	313.65	4.04	321.88	15.09	1088.25	71.26	0.27
2019-01-19 22:45:00	1.39	302.67	2.27	316.69	2.92	315.27	4.48	322.31	14.85	1088.25	72.49	0.189
2019-01-19 23:00:00	0.31	312.39	2.04	327.07	2.66	323.35	3.46	336.44	14.83	1088.25	72.97	0.087
2019-01-19 23:15:00	0.24	312.45	1.06	322.13	1.18	327.81	1.94	335.82	15.13	1088.25	71.9	-0.635
2019-01-19 23:30:00	0.79	312.44	1.54	322.1	1.11	325.68	2.34	322.91	15.25	1088.25	71.23	-0.677
2019-01-19 23:45:00	0	312.49	0	322.12	0	324.86	1.43	323.05	15	1088.92	71.74	-0.908
2019-01-20	0	312.52	0.64	322.14	0.96	324.95	1.78	324.64	14.69	1088.92	74.09	-0.72
2019-01-20 00:15:00	0.06	312.47	0.42	322.13	0.69	324.93	2.13	333.21	14.92	1088.92	73.42	-0.781
2019-01-20 00:30:00	0.01	243.86	0.29	225.32	0.24	324.94	2.19	353.32	14.99	1088.25	73.01	-0.527
2019-01-20 00:45:00	0.04	243.89	0	225.37	0	324.94	1.3	359.69	14.98	1088.92	73.4	-0.847
2019-01-20 01:00:00	0	243.89	0	225.38	0	324.95	2.26	359.28	14.86	1088.92	73.46	-0.902
2019-01-20 01:15:00	0.15	243.74	0.9	185.54	0	324.95	1.66	356.95	14.64	1088.25	75.28	-0.918
2019-01-20 01:30:00	0	243.78	0.07	182.51	0.32	325.06	2.55	360	14.37	1088.25	78.36	-0.601
2019-01-20 01:45:00	1.55	298.95	1.64	346.67	2.83	326.67	3.98	355.63	14.17	1088.25	81.45	-0.61
2019-01-20 02:00:00	0.25	236.04	0.08	338.08	0.89	328.42	2.69	358.93	14.88	1088.92	77.13	-0.603
2019-01-20 02:15:00	0	236.07	0.07	337.99	1.46	338.06	3.42	358.86	14.72	1088.25	78.6	-0.259
2019-01-20 02:30:00	0.56	236.64	1.77	338.11	2.83	341.85	4.02	352.08	14.81	1088.92	77.16	-0.251
2019-01-20 02:45:00	0.93	315.83	2.09	330.85	3.08	345.4	4.58	347.06	15.14	1088.92	74.08	0.157
2019-01-20 03:00:00	1.95	318.81	2.67	329.04	2.74	340.13	4.36	344.6	15.1	1088.92	74.76	0.653
2019-01-20 03:15:00	1.73	315.27	2.75	332.99	3.14	334.08	4.58	340.61	15.16	1088.92	75.51	0.746
2019-01-20 03:30:00	1.13	318.93	2.12	328.67	2.59	334.17	3.31	343.51	15.06	1088.25	76.37	0.321
2019-01-20 03:45:00	0	322.68	0.01	348.05	0.93	349.91	2.56	357.3	14.82	1088.92	76.8	-0.657
2019-01-20 04:00:00	0	322.65	0.72	354.08	1.21	34.93	1.69	13.51	14.6	1088.92	79.16	-0.871
2019-01-20 04:15:00	0	119.07	1.32	99.52	1.61	73.18	2.24	7.52	14.47	1088.92	80.33	-0.646
2019-01-20 04:30:00	0	119	1.22	75.22	1.72	32.94	2.7	0.25	14.36	1088.92	83.29	-0.654
2019-01-20 04:45:00	0	118.97	1.26	71.03	1.24	0.87	3.02	0.15	14.31	1088.92	83.93	-0.422
2019-01-20 05:00:00	0	118.95	1.46	42.76	1.76	18.14	2.78	15.72	14.19	1088.92	83.89	0.014
2019-01-20 05:15:00	0.13	27.23	1.65	16.41	1.85	36.99	3.2	26.18	14.4	1088.92	82.38	0.114
2019-01-20 05:30:00	0.03	4.38	1.57	1.82	1.96	52.4	2.51	28.36	14.63	1088.25	80.19	-0.212
2019-01-20 05:45:00	0	4.37	1.13	0.86	2.03	52.03	3.21	61.75	14.7	1088.25	79.67	-0.508
2019-01-20 06:00:00	0	4.36	0.51	2.59	1.68	36.74	1.71	52.36	14.72	1088.25	79.68	-0.866
2019-01-20 06:15:00	0	4.38	1.28	5.3	2.21	36.91	2.45	43.26	14.71	1088.92	79.81	-0.819
2019-01-20 06:30:00	0	4.38	1.77	11.2	2.7	45.13	2.86	59.08	14.73	1088.25	79.23	-0.731
2019-01-20 06:45:00	0	4.41	1.43	5.64	2.48	51.16	3.2	65.16	14.74	1088.92	79.37	0.597
2019-01-20 07:00:00	1.15	74.22	2.11	8.18	2.8	43.68	3.85	54.34	14.4	1088.92	83.9	2.131
2019-01-20 07:15:00	2.59	83.87	3.62	3.01	4.6	61.96	5.78	67.33	14.45	1088.25	84.52	16.327
2019-01-20 07:30:00	4.41	46.27	5.95	0.67	6.68	37.91	7.54	45.06	14.69	1088.92	82.05	32.865
2019-01-20 07:45:00	4.55	56.69	6.31	11.97	7.12	44.2	8.09	49.25	14.54	1088.92	82.96	49.401
2019-01-20 08:00:00	6.08	44	7.97	42.73	8.93	39.06	10.07	44.48	14.38	1088.25	79.79	60.607
2019-01-20 08:15:00	6.98	41.61	9.07	40.15	10.22	36.45	10.98	42.61	13.91	1088.92	83.9	77.044
2019-01-20 08:30:00	8.51	42.94	10.82	38.68	11.84	35.26	12.92	40.86	13.66	1088.92	86.96	73.255
2019-01-20 08:45:00	7.24	49.04	9.2	42.91	10.26	39.87	11.09	44.26	13.31	1088.25	89.75	76.311
2019-01-20 09:00:00	7.38	64.56	9.64	56.08	10.25	51.75	10.4	57.45	13.2	1088.25	91.11	71.708
2019-01-20 09:15:00	7.28	50.36	9.63	44.46	10.15	40.5	10.76	45.67	13.3	1088.25	91.49	59.368
2019-01-20 09:30:00	7.79	35.26	9.6	30.72	10.7	27.52	11.31	31.72	13.21	1088.25	91.21	59.203
2019-01-20 09:45:00	7.88	40.17	9.63	35.15	10.56	31.36	11.26	36.32	13.47	1088.92	88.94	70.076
2019-01-20 10:00:00	7.97	39.06	9.79	32.19	10.94	28.44	12.08	35.08	13.61	1088.25	87.74	68.187
2019-01-20 10:15:00	7.64	39.52	9.87	32.47	10.78	30.53	11.56	34.27	13.48	1088.92	87.02	72.722
2019-01-20 10:30:00	8.44	41.68	10.52	35.35	11.36	30.88	12.15	35.49	13.49	1088.92	87.02	69.467
2019-01-20 10:45:00	8.56	37.94	10.38	33.45	11.57	30.14	12.48	35.98	13.45	1088.92	86.9	69.362
2019-01-20 11:00:00	7.74	35.15	9.49	30.82	10.7	29.83	11.59	33.91	13.35	1088.25	87.07	70.24
2019-01-20 11:15:00	7.44	37.73	9.68	30.4	11.09	26.31	12.47	32.4	13.25	1088.92	86.92	66.092
2019-01-20 11:30:00	7.73	34.27	9.59	30.27	10.69	28.74	11.11	36.04	13.32	1088.92	86.96	65.419
2019-01-20 11:45:00	7.67	35.9	9.84	30.31	10.77	28.79	11.24	34.8	13.21	1088.92	86.97	69.986
2019-01-20 12:00:00	8.3	35.05	10.15	31.69	11.34	30.23	11.99	35.98	13.14	1088.92	86.76	70.428
2019-01-20 12:15:00	8.28	41.74	10.16	34.87	10.94	32.78	11.53	38	13.17	1088.92	86.78	73.61
2019-01-20 12:30:00	8.22	35.63	10.42	29.8	11.4	25.46	12.48	30.85	13.18	1088.92	86.74	73.531
2019-01-20 12:45:00	7.61	36.83	9.39	30.51	10.82	29.07	11.82	34.57	13.16	1088.92	86.42	77.117
2019-01-20 13:00:00	7.52	38.26	9.27	34.26	10.52	31.88	10.98	36.51	13.05	1088.92	86.16	73.851
2019-01-20 13:15:00	8.24	33.68	10.1	28.17	11.37	27.05	12.38	32.74	13.09	1088.25	85.83	76.253
2019-01-20 13:30:00	7.7	33.78	9.55	29.86	10.96	28.2	11.66	35.25	13.06	1088.92	85.43	77.892
2019-01-20 13:45:00	7.75	40.72	10.02	37.03	11.32	34.58	11.87	39.12	12.92	1088.25	84.75	78.238
2019-01-20 14:00:00	7.49	40.83	8.97	35.22	9.76	32.51	10.61	36.8	12.98	1088.25	84.39	72.983
2019-01-20 14:15:00	8.4	38.77	10.16	33.3	11.52	32.38	12.42	38.58	12.91	1088.92	83.61	74.784
2019-01-20 14:30:00	7.87	40.59	10.03	36.98	10.99	34.73	11.7	41.42	12.86	1088.25	84.09	72.92
2019-01-20 14:45:00	7.81	43.64	10.47	39.4	11.55	38.08	12.01	44.25	12.76	1088.25	84.17	73.96
2019-01-20 15:00:00	7.93	42.64	10.56	38.71	12.08	38.49	12.87	43.32	12.64	1088.92	84.84	71.92
2019-01-20 15:15:00	7.63	40.77	9.9	36.84	11.28	35.85	12.17	40.8	12.45	1088.25	84.55	72.054
2019-01-20 15:30:00	7.89	41.06	9.82	36.18	10.92	34.01	11.5	41.14	12.48	1088.92	83.9	67.016
2019-01-20 15:45:00	7.17	40.43	9.01	35.27	10.13	34.32	10.9	39.03	12.57	1088.92	83.44	62.014
2019-01-20 16:00:00	6.83	35.03	8.27	31.28	9.41	29.08	10.18	34.09	12.53	1088.92	82.05	59.652
2019-01-20 16:15:00	7.21	34.89	8.86	30.46	10.49	28.69	11.09	35.17	12.58	1088.25	80.46	57.867
2019-01-20 16:30:00	7.56	42.32	9.7	37.55	10.62	36.16	11.08	40.71	12.66	1088.92	79.74	56.906
2019-01-20 16:45:00	7.54	39.88	9.65	37.17	10.84	36.53	11.55	42.22	12.72	1088.92	78.91	59.499
2019-01-20 17:00:00	7.74	42.89	9.63	37.16	10.73	36.5	11.74	42.82	12.78	1088.92	78.49	63.812
2019-01-20 17:15:00	7.83	39.85	9.91	38.18	10.88	37.78	11.52	42.58	12.7	1088.92	79.17	70.712
2019-01-20 17:30:00	7.98	42.39	10.08	37.3	11.29	36.66	12.05	43.75	12.66	1088.92	80.2	67.35
2019-01-20 17:45:00	7.6	41.6	10.3	38.28	11.54	37.05	12.61	42.75	12.71	1088.92	80.7	69.594
2019-01-20 18:00:00	7.34	47.3	9.65	41.11	10.47	40.19	11.47	45.55	12.64	1088.92	80.29	67.58
2019-01-20 18:15:00	7.21	43.94	9.64	36.91	10.8	37.2	11.5	43.64	12.72	1088.92	79.04	70.966
2019-01-20 18:30:00	7.19	48.59	9.63	45.51	10.48	42.8	11.12	47.81	12.73	1088.92	75.8	70.728
2019-01-20 18:45:00	6.67	58.17	10.35	50.68	11.27	47.7	11.67	53.55	13	1088.92	72.19	73.352
2019-01-20 19:00:00	8.31	57.18	11.31	50.92	12.04	48.06	12.41	53.67	12.97	1088.92	72.15	74.801
2019-01-20 19:15:00	7.78	49.54	10.79	46.25	11.88	44.52	11.93	49.5	13.01	1088.25	71.92	76.492
2019-01-20 19:30:00	7.4	51.86	9.96	46.5	10.69	43.88	10.99	50.25	13.07	1088.92	74.16	77.185
2019-01-20 19:45:00	7.64	51.65	10.45	45.46	11.51	43.13	12.29	49.16	13.06	1088.92	73.26	77.692
2019-01-20 20:00:00	7.82	47.56	10.45	42.74	11.44	42.02	11.95	47.33	13.08	1089.58	75.33	83.765
2019-01-20 20:15:00	7.95	46.38	10.46	40.63	11.36	39.26	12.32	45.04	12.81	1088.92	74.61	83.369
2019-01-20 20:30:00	8	44.52	10.14	38.77	11.31	38.22	12.05	44.14	12.8	1088.92	75.38	84.62
2019-01-20 20:45:00	8.67	44.03	10.9	37.85	12.05	37.06	13.03	42.77	12.67	1088.92	73.66	83.271
2019-01-20 21:00:00	8.11	40.03	10.27	36.74	11.45	37.04	12.36	41.9	12.76	1088.92	74.82	82.409
2019-01-20 21:15:00	8.3	39.74	10.24	32.59	11.13	32.21	11.37	36.63	12.67	1089.58	73.09	80.738
2019-01-20 21:30:00	9.13	39.91	11.23	34.45	12.2	33.87	12.65	39.18	12.4	1088.92	74.96	86.329
2019-01-20 21:45:00	9.31	50.77	11.87	42.66	12.45	40.75	13.06	47.11	12.44	1088.92	73.93	85.621
2019-01-20 22:00:00	8.81	47.72	11.02	40.83	11.94	38.87	12.99	43.64	12.38	1088.92	74.76	85.17
2019-01-20 22:15:00	8.8	49.83	11.37	41.42	12.11	39.78	12.9	44.63	12.39	1089.58	73.64	82.162
2019-01-20 22:30:00	9.52	49.95	11.77	43.29	12.6	42.26	13.05	47.68	12.45	1088.92	74.91	80.562
2019-01-20 22:45:00	8.55	55.1	10.89	47.63	11.82	46.54	12.43	52.89	12.52	1088.92	73.17	80.38
2019-01-20 23:00:00	8.52	46.43	10.95	39.92	11.82	39.27	12.71	45.6	12.44	1088.92	71.35	82.826
2019-01-20 23:15:00	9.43	42.56	11.84	40.41	12.86	36.79	13.59	41.39	12.4	1088.92	71.52	84.585
2019-01-20 23:30:00	8.46	47.83	11.03	42.9	11.83	40.76	12.67	46.32	12.41	1088.92	71.13	86.182
2019-01-20 23:45:00	8.97	41.34	11.84	37.5	13.35	35.71	14.51	42.7	12.29	1088.92	69.95	85.729
2019-01-21	8.86	35.46	11.16	32.9	12.16	31.47	13.05	38.49	12.21	1088.92	71.87	86.628
2019-01-21 00:15:00	9.69	40.95	12.39	15.58	13.7	35.74	14.45	39.8	12.1	1088.92	71.45	87.57
2019-01-21 00:30:00	10.15	40.69	13.12	19.47	14.8	35.32	15.97	40.81	11.88	1088.92	70.92	86.839
2019-01-21 00:45:00	9.31	40.62	11.69	23.51	12.9	32.53	13.44	38.07	11.76	1088.25	69.82	87.19
2019-01-21 01:00:00	9.14	37.39	11.52	30.55	12.79	29.49	13.77	34.47	11.48	1088.92	72.26	85.626
2019-01-21 01:15:00	8.16	40.74	10.76	34.65	12.53	35.73	13.72	40.56	11.28	1088.92	73.77	87.185
2019-01-21 01:30:00	8.66	43.59	11.59	39.21	13.05	38.59	13.83	44.05	11.26	1088.92	74.58	85.694
2019-01-21 01:45:00	9.71	39.35	12.45	12.87	13.86	35.87	14.52	42.9	11.19	1088.92	73.9	84.794
2019-01-21 02:00:00	9.37	46.63	12.73	25.87	14.01	39.58	15.04	45.24	11.34	1088.92	71.18	85.051
2019-01-21 02:15:00	8.93	51.34	11.45	4.87	12.41	44.57	12.8	49.13	11.27	1088.25	69.1	85.05
2019-01-21 02:30:00	8.18	46.84	11.51	1.02	12.53	39.44	12.9	44.44	11.42	1088.92	69.88	84.488
2019-01-21 02:45:00	8.89	43.63	11.65	38.38	12.8	39.23	13.76	45.27	11.38	1088.92	68.23	85.848
2019-01-21 03:00:00	8.54	45.84	11.43	40.45	12.39	40.09	12.65	48.87	11.37	1088.92	65.64	84.581
2019-01-21 03:15:00	8.24	47.34	12.18	46.71	13.27	43.78	13.85	49.13	11.37	1088.92	65.21	85.639
2019-01-21 03:30:00	9.34	42.62	12.18	38.41	13.63	37.75	14.53	44.25	11.32	1088.25	65.76	86.8
2019-01-21 03:45:00	7.68	47.84	11.71	23.52	12.68	41.37	13.35	47.28	11.27	1088.92	64.58	84.551
2019-01-21 04:00:00	9.29	48.43	12.2	25.67	13.4	40.58	14.06	46.64	11.24	1088.92	66	84.019
2019-01-21 04:15:00	8.34	47.47	11.73	45.37	12.62	43.2	12.79	48.61	11.12	1088.92	65.36	83.366
2019-01-21 04:30:00	7.84	41.2	10.46	36.91	11.69	38.05	12.3	44.49	11.14	1088.92	66.95	85.337
2019-01-21 04:45:00	9.68	40.82	12.24	36.53	13.81	35.48	15.05	41.11	11.04	1088.25	65.81	86.449
2019-01-21 05:00:00	9	44.08	12.04	37.76	13.41	37.77	14.61	43.42	10.96	1088.92	66.71	86.135
2019-01-21 05:15:00	7.92	47.7	11.02	31.52	11.8	42.16	12.16	47.25	10.89	1088.92	66.74	85.255
2019-01-21 05:30:00	8.45	45.84	11.29	33.58	12.06	40.51	12.16	45.03	10.7	1088.92	66.77	87.249
2019-01-21 05:45:00	9.68	38.35	12.34	34.89	13.66	34.5	14.63	40.81	10.74	1088.25	67.64	89.076
2019-01-21 06:00:00	8.79	43.81	12.03	38.14	13.27	36.82	14.12	41.13	10.72	1088.25	65.34	89.776
2019-01-21 06:15:00	9.12	43.21	11.52	0.29	13.16	36.11	14.4	42.21	10.72	1088.92	64.15	87
2019-01-21 06:30:00	9.3	41.5	12.16	0.36	13.57	36.17	14.72	41.57	10.69	1088.92	65.05	81.327
2019-01-21 06:45:00	8.57	37.68	10.9	32.76	12.17	33.64	13.27	41.22	10.61	1088.25	64.35	83.202
2019-01-21 07:00:00	8.32	38.97	10.56	32.97	11.81	33.38	11.98	39.66	10.57	1088.25	65.1	85.095
2019-01-21 07:15:00	9.21	44.83	11.99	39.71	13.1	38.63	13.85	44.49	10.43	1088.92	61.87	87.958
2019-01-21 07:30:00	9.48	41.51	12.71	9.24	14.36	36.97	15.39	42.62	10.54	1089.58	62.72	87.757
2019-01-21 07:45:00	8.75	38.24	11.25	22.96	12.54	32.91	13.73	38.37	10.51	1088.92	62.67	87.973
2019-01-21 08:00:00	9.2	41.5	11.33	34.42	12.68	35.5	13.6	40.11	10.61	1088.92	59.18	88.16
2019-01-21 08:15:00	8.45	36.5	10.52	29.57	11.7	30.45	12.43	36.87	10.57	1088.92	58.28	86.497
2019-01-21 08:30:00	8.3	35.99	10.02	29.11	11.59	29.33	12.71	34.98	10.4	1088.92	60.47	86.032
2019-01-21 08:45:00	9.08	41.16	11.51	7.21	12.63	31.23	13.33	36.73	10.44	1088.92	62.6	88.951
2019-01-21 09:00:00	8.71	41.69	10.54	33.29	11.5	33.65	12.06	39.41	10.41	1088.92	62.11	84.598
2019-01-21 09:15:00	8.9	36.22	11.41	28.39	12.57	27.11	13.23	35.34	10.11	1088.92	65.87	83.734
2019-01-21 09:30:00	8.72	39.09	10.65	30.52	11.73	30.58	12.49	35.21	10.27	1088.92	65.18	83.489
2019-01-21 09:45:00	8.9	36.26	11.02	29.82	11.97	28.44	12.73	34.62	10.62	1088.25	65.96	80.073
2019-01-21 10:00:00	8.58	38.33	10.43	29.73	11.25	28.54	11.56	33.41	10.43	1088.25	65.89	78.773
2019-01-21 10:15:00	8.83	36.07	10.89	27.33	12	23.89	13.17	28.71	10.47	1088.92	63.91	75.001
2019-01-21 10:30:00	9.08	35.37	11.12	27.18	12.35	25.97	12.93	29.48	10.54	1088.92	64	77.292
2019-01-21 10:45:00	9.33	29.07	10.61	23.78	11.62	22.18	12.33	27.85	10.58	1088.92	63.26	81.181
2019-01-21 11:00:00	9.01	41.09	11.02	33.33	11.78	32.31	12.55	37.33	10.69	1088.25	65.75	79.047
2019-01-21 11:15:00	9.41	34.93	11.34	27.5	12.41	24.75	13.41	29.19	10.65	1088.92	63.74	82.704
2019-01-21 11:30:00	9.88	32.8	11.27	25.77	12.11	24.72	13.23	31.01	10.69	1088.92	63.6	82.673
2019-01-21 11:45:00	9.39	31.29	11.25	26.67	12.44	23.9	13.07	27.68	10.56	1088.92	62.91	76.955
2019-01-21 12:00:00	8.76	31.33	10.22	23.75	11.22	21.03	11.69	25.66	10.78	1088.92	62.89	70.839
2019-01-21 12:15:00	9.07	31.48	10.88	25.61	11.88	24.32	12.26	30.05	10.64	1088.92	65.07	69.617
2019-01-21 12:30:00	9.21	29.71	10.74	24.33	11.29	22.65	12.09	27.07	10.62	1088.92	64.07	69.156
2019-01-21 12:45:00	8.8	34.97	10.83	25.86	11.82	26.72	12.4	31.3	10.61	1088.92	64.79	65.29
2019-01-21 13:00:00	8.53	33.75	10.05	26.12	10.77	25.23	11.57	30.73	10.59	1088.92	63.2	62.944
2019-01-21 13:15:00	8.72	30.35	10.35	10.12	11.12	21.49	11.93	27.04	10.74	1088.92	62.32	65.87
2019-01-21 13:30:00	8.39	40.11	10.68	29.11	11.7	30.31	12.45	33.76	10.6	1088.92	60.7	63.953
2019-01-21 13:45:00	7.55	34.49	9.77	26.94	11.03	25.77	11.86	32.23	10.82	1088.92	61.98	59.777
2019-01-21 14:00:00	7.51	35.58	9.26	28.12	10.48	28.68	11.27	33.56	10.74	1088.92	64.61	58.304
2019-01-21 14:15:00	7.7	30.23	9.04	25.16	9.93	24.18	10.44	30.47	10.68	1088.92	62.71	56.279
2019-01-21 14:30:00	7.24	33.73	9.02	27.61	9.93	26.84	10.99	31.21	10.63	1088.25	61.83	54.138
2019-01-21 14:45:00	7.5	41.85	9.17	20.38	9.55	31.39	10.12	36.21	10.64	1089.58	62.94	52.13
2019-01-21 15:00:00	7.95	32.82	9.76	1.87	10.59	28.13	11.05	32.33	10.75	1088.25	62.42	51.394
2019-01-21 15:15:00	7.93	43.7	9.98	36.18	11.09	36.19	11.45	40.25	10.54	1088.92	62.81	53.391
2019-01-21 15:30:00	7	41.04	8.6	16.64	9.76	33.42	10.52	39.33	10.61	1088.25	61.52	54.671
2019-01-21 15:45:00	7.63	30.59	9.4	25.46	10.32	25.57	11.04	32.76	10.57	1088.92	61.87	55.848
2019-01-21 16:00:00	7.48	40.9	9.56	33.91	10.23	35.29	11.27	39.66	10.57	1088.92	61.96	55.67
2019-01-21 16:15:00	7.22	38.98	8.81	21.34	9.72	33.46	10.19	39.29	10.51	1088.92	60.71	55.135
2019-01-21 16:30:00	6.9	39.79	9.12	26.33	10.35	34.94	11.08	41.63	10.55	1088.92	63.14	52.553
2019-01-21 16:45:00	7.1	36.83	9.05	33.49	10.1	35.16	10.6	38.74	10.57	1088.92	64.77	49.379
2019-01-21 17:00:00	7.17	35.18	9.12	29.76	10.36	33.04	11.17	37.27	10.6	1088.92	62.69	44.708
2019-01-21 17:15:00	6.3	40.25	8.22	33.78	8.76	34.56	9.39	38.82	10.51	1088.25	63.99	46.381
2019-01-21 17:30:00	6.16	33.49	7.67	28.15	8.77	28.73	9.23	36.07	10.47	1088.25	62.01	42.875
2019-01-21 17:45:00	6.98	31.5	8.72	25.73	9.81	25.83	10.24	31.42	10.57	1088.92	61.44	42.905
2019-01-21 18:00:00	7.09	36.58	9.41	27.55	10.72	29.27	11.28	34.88	10.66	1089.58	62.33	43.139
2019-01-21 18:15:00	7.28	42.66	9.19	34.17	10.01	35.93	10.57	39.83	10.5	1088.92	64.72	40.129
2019-01-21 18:30:00	6.67	37.08	8.61	30.82	9.53	32.93	10.31	37.55	10.59	1088.25	65.31	42.067
2019-01-21 18:45:00	6.1	38.42	7.93	32.29	8.88	32.73	9.43	39.21	10.6	1088.92	64.68	39.858
2019-01-21 19:00:00	6.4	39.2	8.04	32.92	8.72	32.58	9.49	39.55	10.63	1088.92	63.32	44.196
2019-01-21 19:15:00	6.41	36.22	8.01	28.86	8.77	28.63	9.37	32.56	10.71	1088.92	63.46	49.49
2019-01-21 19:30:00	6.41	36.22	8.01	28.86	8.77	28.63	9.37	32.56	10.71	1088.92	63.46	51.333
2019-01-21 19:45:00	7.23	41.42	9.16	34.05	10.09	35.54	10.43	40.67	10.8	1088.25	59.42	53.506
[truncated: 68,177 more rows]
